# Supplementary material for: Wnt signaling mediates acquisition of blood–brain barrier properties in naïve endothelium derived from human pluripotent stem cells
Source: eLife journal article supplement (doi:10.7554/elife.70992), 2021-11-10
Supplement: supp [file elife-70992-supp-v2.zip]

**Passage1\_GLUT-1.tif**

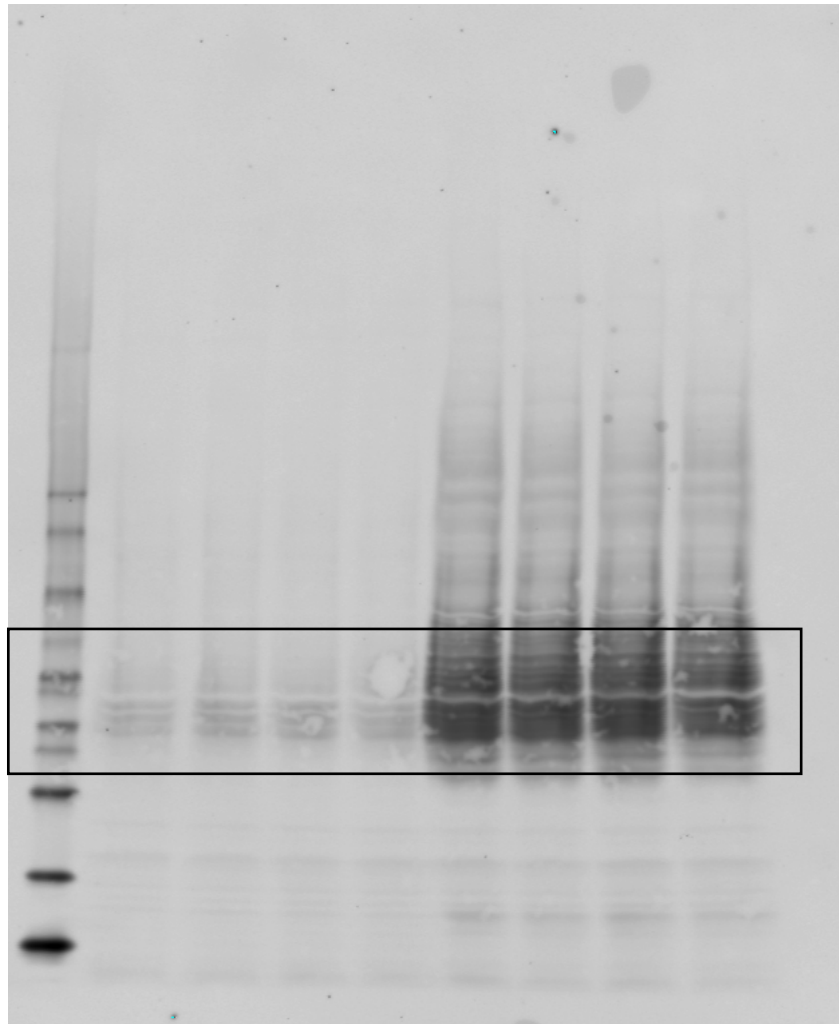

**GLUT-1**

**Passage1\_Cldn5.tif**

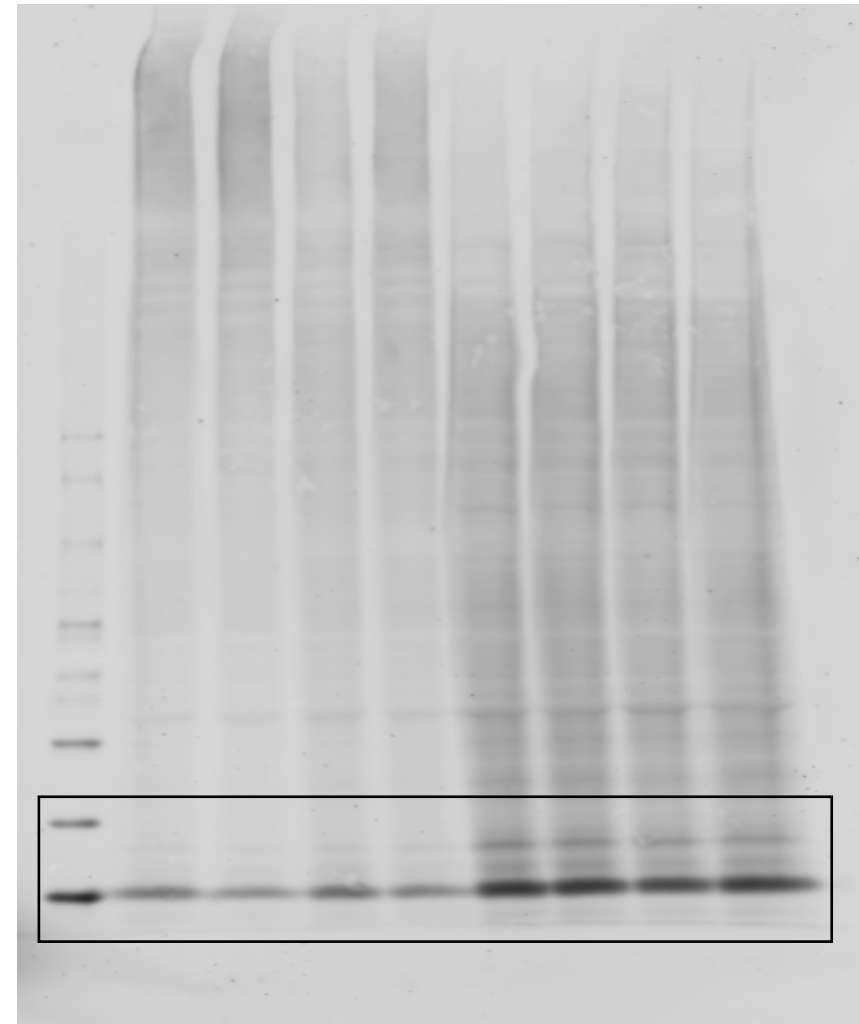

**Claudin-5**

Passage1\_PLVAP.tif

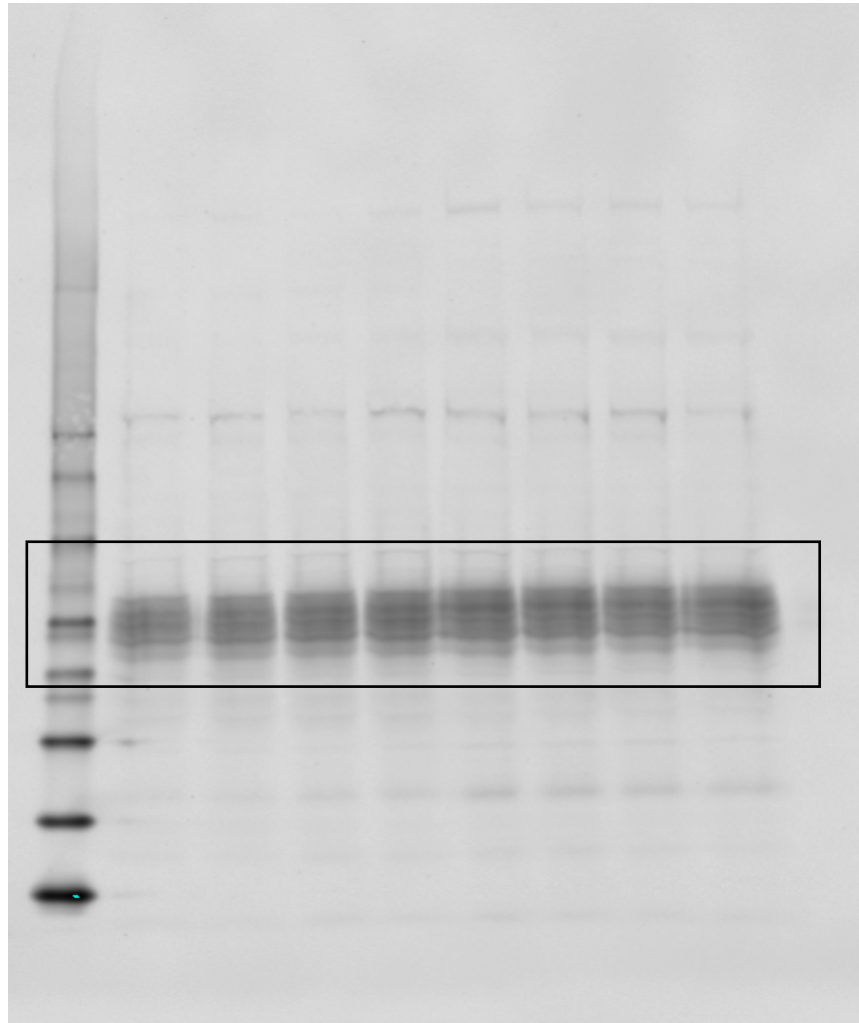

PLVAP

Passage1\_VE-cad\_PLVAP\_Cldn5.tif

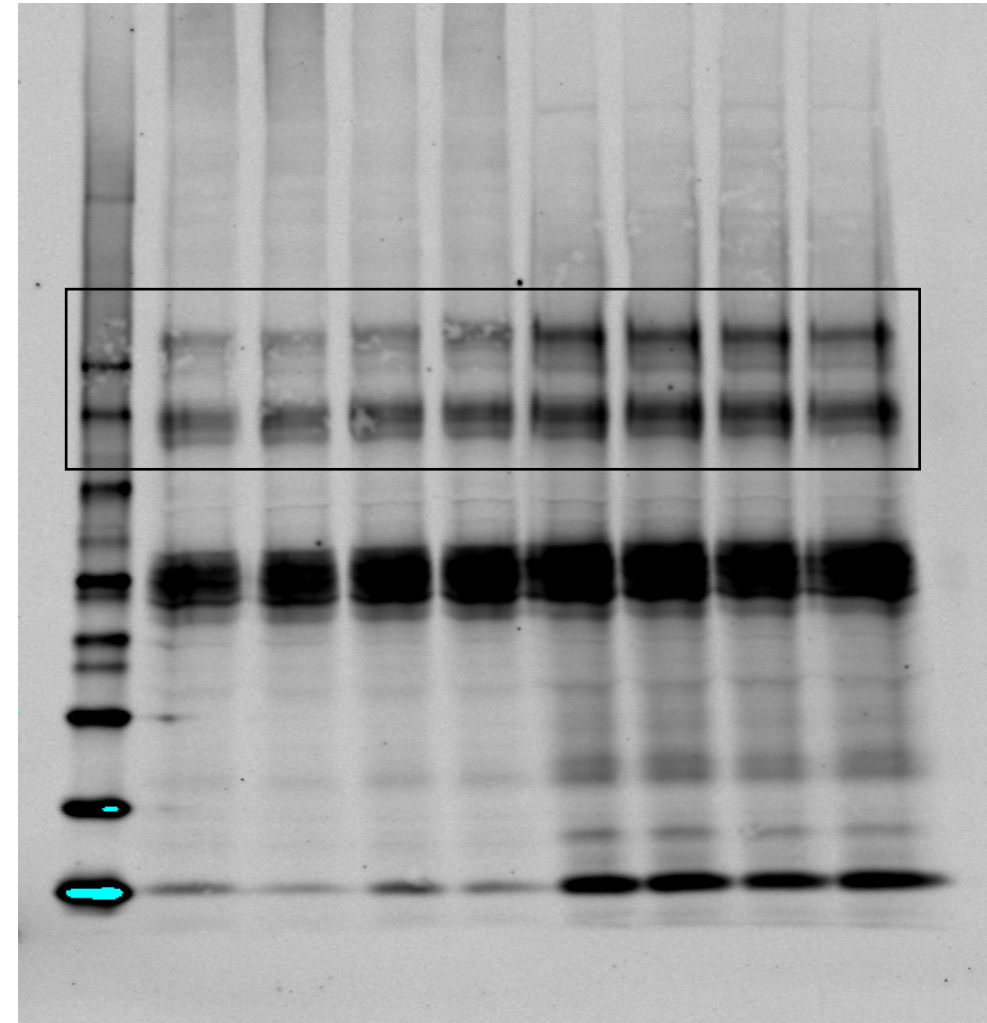

VE-cadherin

(PLVAP)

(Claudin-5)

Passage1\_LSR\_B-actin.tif

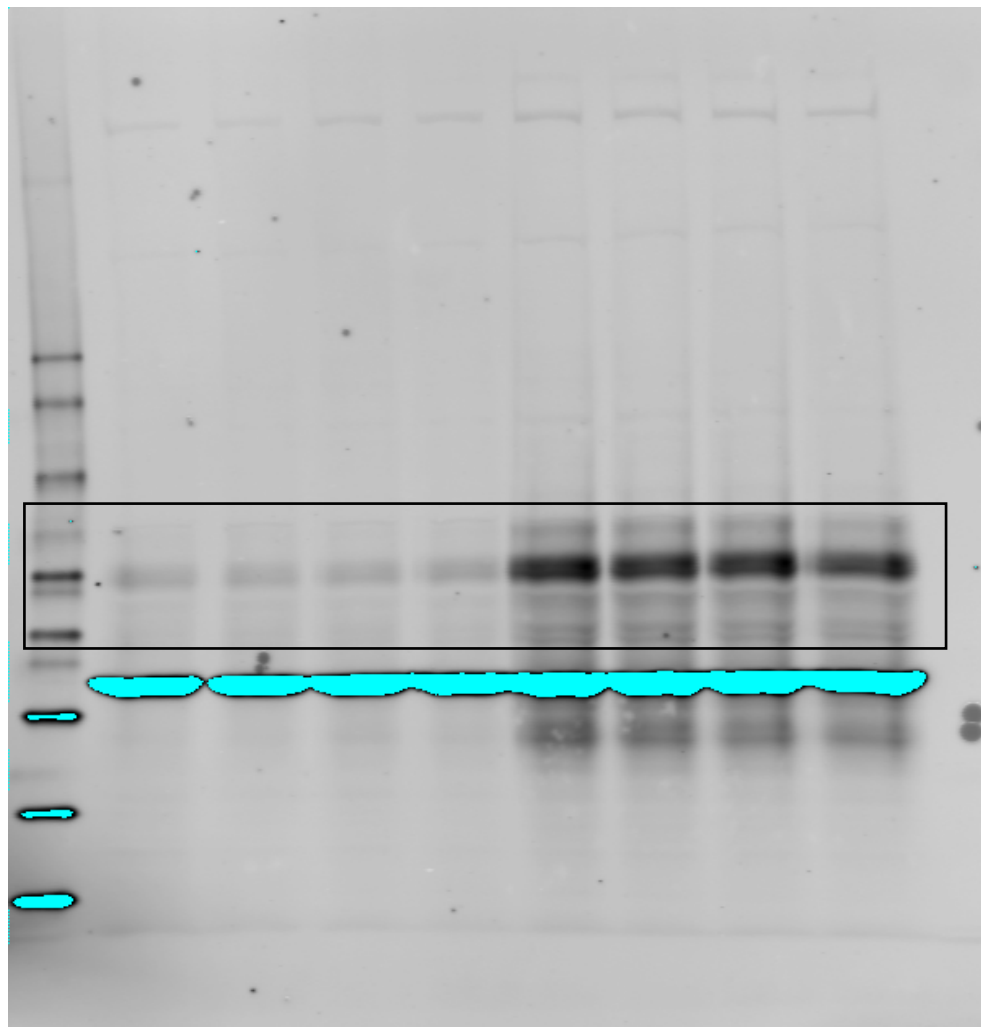

LSR  
( $\beta$ -actin)

Passage1\_B-actin.tif

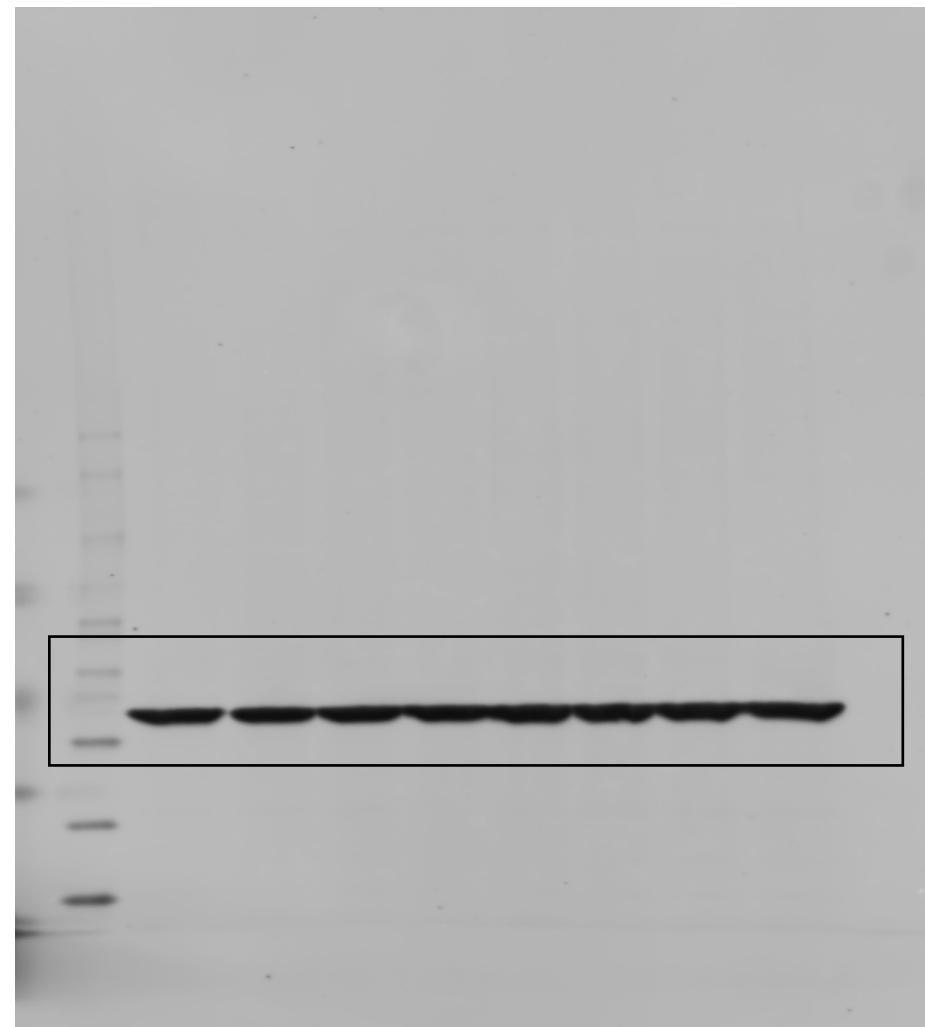

$\beta$ -actin

**Passage3\_GLUT-1.tif**

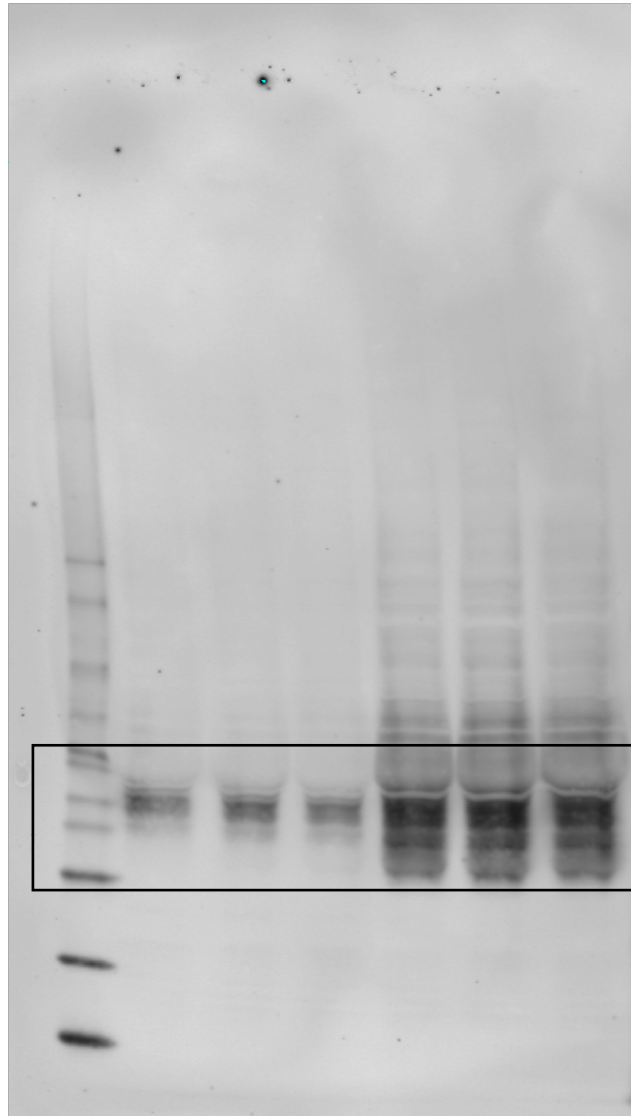

**GLUT-1**

**Passage3\_VE-cad\_Cldn5.tif**

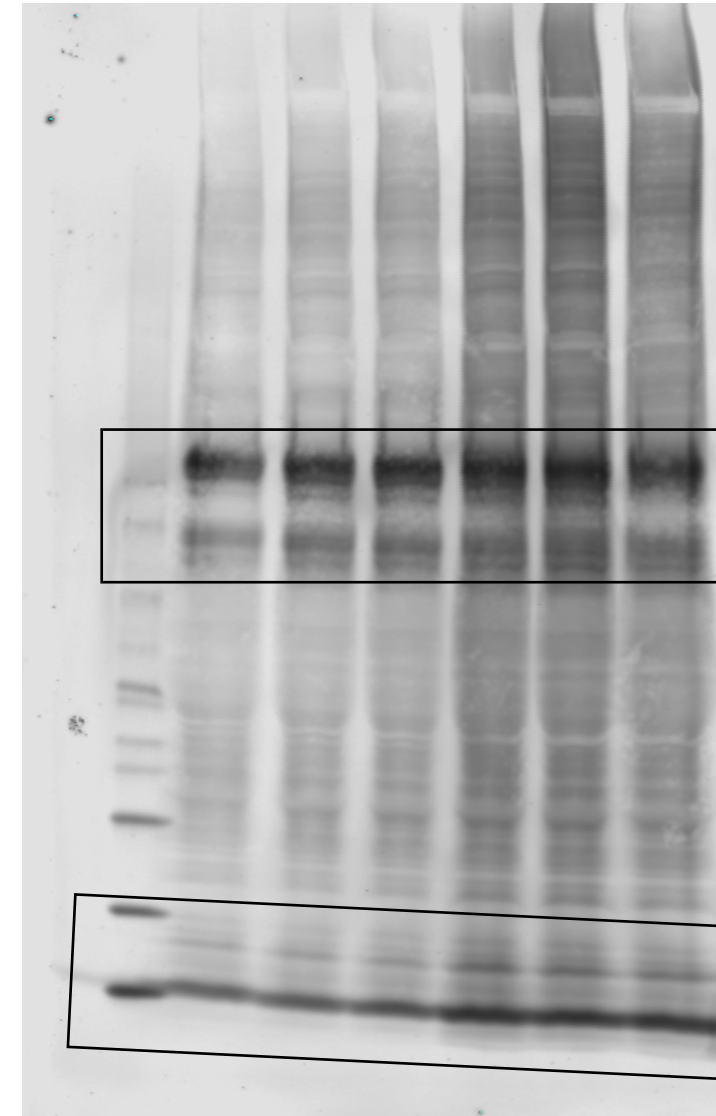

**VE-cadherin**

**Claudin-5**

Passage3\_PLVAP.tif

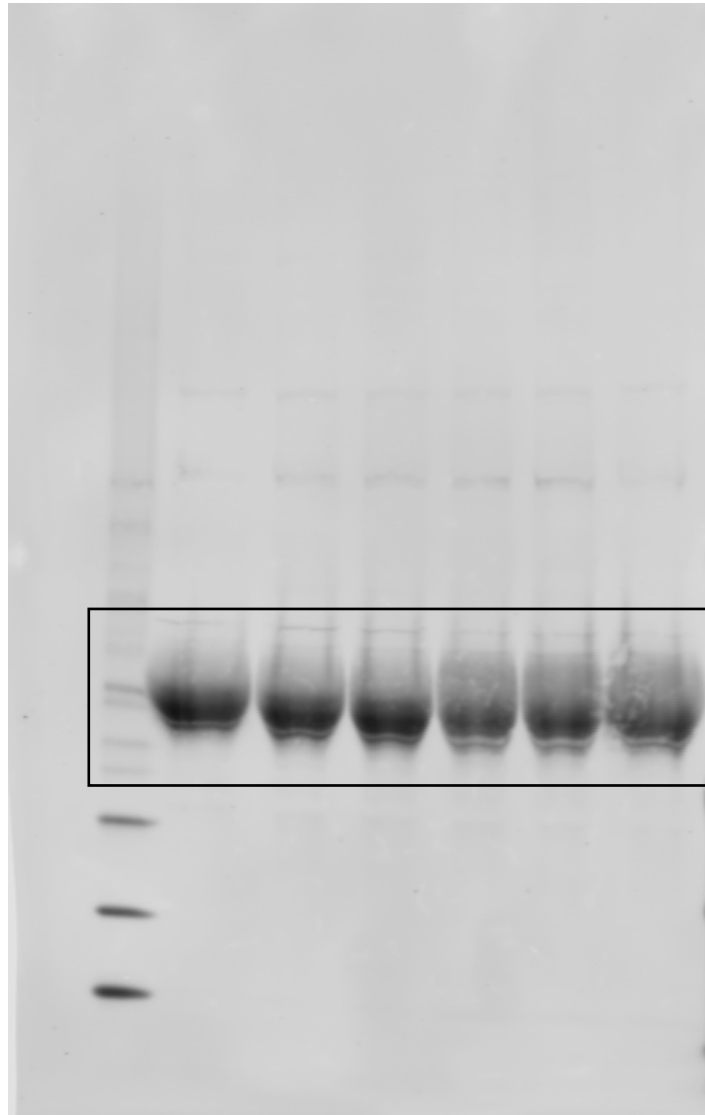

PLVAP

Passage3\_B-actin\_LSR.tif

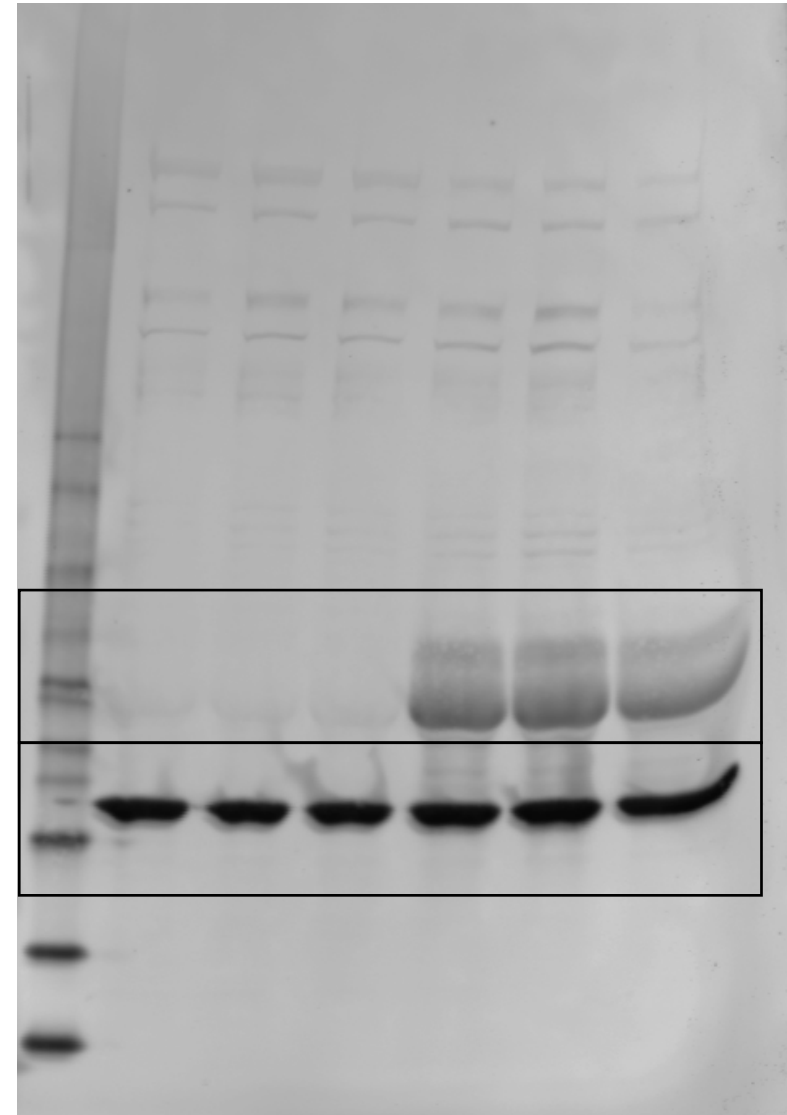

LSR

$\beta$ -actin
