# Supplementary material for: Wnt signaling mediates acquisition of blood–brain barrier properties in naïve endothelium derived from human pluripotent stem cells
Source: eLife journal article supplement (doi:10.7554/elife.70992), 2021-11-10
Supplement: supp [file elife-70992-supp-v2.zip]

A

## hPSC EC, Passage 1, CHIR/DMSO

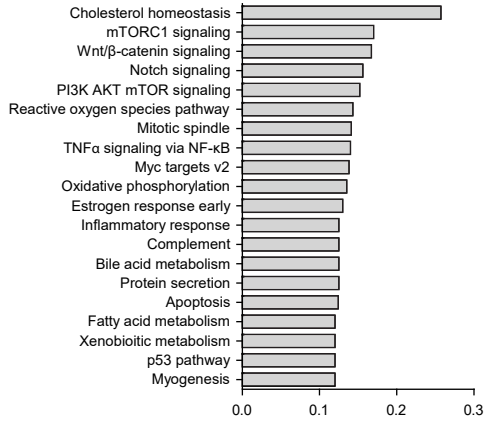

## hPSC EC, Passage 3, CHIR/DMSO

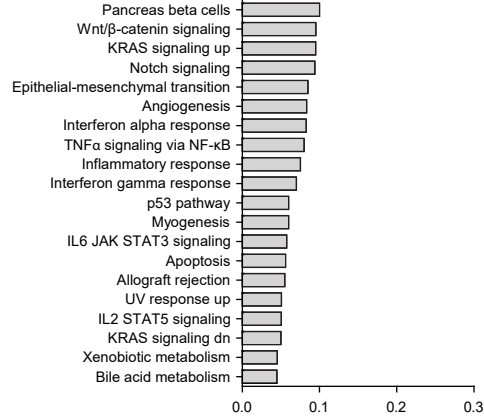

## Pituitary EC, β-cat-GOF/control

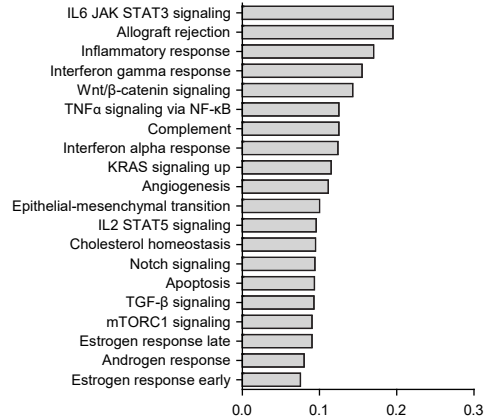

K/K

B

hPSC EC,  
Passage 1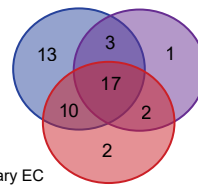hPSC EC,  
Passage 3

C

Wnt/β-catenin signaling

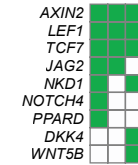

Notch signaling

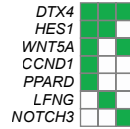

TGF-β signaling

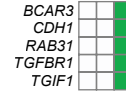

TNFα signaling via NF-κB

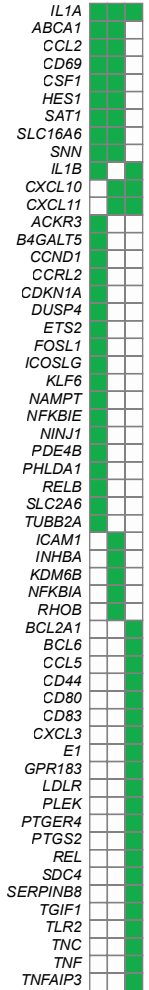

IL6 JAK STAT3 signaling

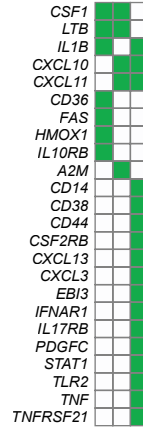

KRAS signaling up

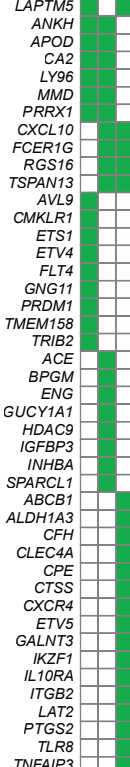

PI3K AKT mTOR signaling

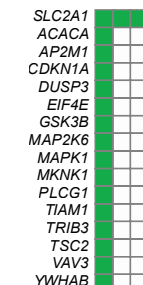

mTORC1 signaling

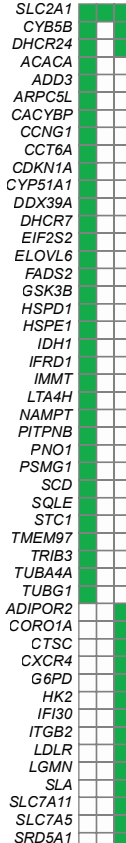

Pituitary EC, β-cat-GOF/control  
hPSC EC, Passage 3, CHIR/DMSO  
hPSC EC, Passage 1, CHIR/DMSO

Up,  $P_{adj} < 0.05$
