# Supplementary material for: Wnt signaling mediates acquisition of blood–brain barrier properties in naïve endothelium derived from human pluripotent stem cells
Source: eLife. 2021 Nov 10;10:e70992. doi: 10.7554/eLife.70992 (PMC8664294; doi:10.7554/eLife.70992)
Supplement: Supplementary file 1. — Abundances are provided in transcripts per million (TPM). [file elife-70992-supp1.xlsx]

## Sheet: TPM
geneid	genename	P1DMSO2	P1DMSO3	P1DMSO5	P1DMSO6	P1CHIR2	P1CHIR3	P1CHIR5	P1CHIR6	P3DMSO2	P3DMSO3	P3DMSO6	P3CHIR2	P3CHIR3	P3CHIR6	P1SMLC3	P1SMLC6
ENSG00000121410.11	A1BG	18.99	30.92	34.41	23.69	30.8	39.16	45.05	17.15	76.74	57.94	77.71	148.5	50.36	49.45	63.25	25.95
ENSG00000268895.5	A1BG-AS1	6.44	5.18	10.19	7.02	5.46	5.15	6.8	6.11	12	8.96	10.04	6.38	6.35	7.54	7.54	8.56
ENSG00000148584.14	A1CF	0	0	0	0	0	0	0	0	0	0	0	0	0	0	0	0
ENSG00000175899.14	A2M	36.44	58.82	123.87	122.54	37.73	53.98	92.84	106.36	26.28	17.06	40.86	43.46	133.7	183.04	1.13	1.41
ENSG00000245105.3	A2M-AS1	1.55	1.35	1.15	3.25	1.1	2.17	0.81	3.1	1.08	0.72	1.35	0.68	0.59	1.24	0.35	0.81
ENSG00000166535.19	A2ML1	0	0	0	0	0	0	0	0	0	0	0	0	0	0	0	0
ENSG00000256661.1	A2ML1-AS1	0	0	0	0	0	0	0	0	0	0	0	0	0	0	0	0
ENSG00000256904.1	A2ML1-AS2	0	0	0	0	0	0	0	0	0	0	0	0	0	0	0	0
ENSG00000256069.7	A2MP1	0	0	0	0	0	0	0	0	0	0.07	0	0	0	0	0	0
ENSG00000184389.9	A3GALT2	0	0	0	0	0	0	0	0	0	0	0	0	0	0	0	0
ENSG00000128274.16	A4GALT	1.16	2.29	6.03	3.22	0.58	0.23	1.3	0.41	1.63	1.78	3.48	4	3.09	6.03	4.31	3
ENSG00000118017.3	A4GNT	0	0	0	0	0	0	0	0	0	0	0	0	0	0	0.05	0
ENSG00000265544.1	AA06	0	0	0	0	0	0	0	0	0	0	0	0	0	0	0	0
ENSG00000094914.12	AAAS	82.7	63.49	62.57	87.69	73.42	61.66	72.51	85.26	56.32	59.95	59.41	27.29	48.55	48.31	70.22	87.52
ENSG00000081760.16	AACS	23.03	26.19	25.15	24.17	28.3	30.46	28.6	22.51	28.41	22.85	29.63	13.35	25.27	25.02	31.62	25.67
ENSG00000250420.8	AACSP1	0	0.17	0	0.08	0.06	0.13	0.02	0	0	0	0.04	0.19	0.02	0.02	0.05	0
ENSG00000114771.13	AADAC	0	0	0	0.03	0	0	0	0	0	0	0.08	0	0	0	0	0
ENSG00000197953.5	AADACL2	0	0	0	0	0	0	0	0	0	0	0	0	0	0	0	0
ENSG00000242908.6	AADACL2-AS1	0	0	0	0	0	0	0	0	0	0	0	0	0	0	0	0
ENSG00000188984.11	AADACL3	0	0	0	0	0	0	0	0	0	0	0	0	0	0	0	0
ENSG00000204518.2	AADACL4	0	0	0	0	0	0	0	0	0	0	0	0	0	0	0	0
ENSG00000240602.7	AADACP1	2.81	2.02	1.43	1.29	0.52	0.89	0.33	1.22	2.08	4.15	2.82	2.35	0.89	2.11	0.09	0
ENSG00000109576.13	AADAT	6.33	6.22	5.69	10.07	6.6	8.92	5.79	9.94	4.63	7.93	7.62	2.67	10.08	12.32	7.85	15.59
ENSG00000103591.12	AAGAB	103.06	97.84	82.86	90.76	108.84	84.82	101.23	117.65	80.27	91.71	79.53	22.43	106.15	99.4	67.21	79.87
ENSG00000115977.18	AAK1	22.92	20.11	32.92	37.62	24.27	22.73	29.53	21.49	30.61	18.42	24.76	64.3	24.69	24.59	8.35	10.13
ENSG00000087884.14	AAMDC	123.52	113.47	131.08	108.2	107.49	104.97	130.46	97.3	148.02	132.04	161.25	231.43	126.03	123.29	123.25	109.64
ENSG00000127837.9	AAMP	151.08	166.1	151.47	173.5	140.16	156.42	128.03	148.9	117.93	114.21	108.87	103.39	101.54	108.13	139.12	144.86
ENSG00000129673.9	AANAT	0	0.24	0.08	0	0.21	0	0	0	0	0.1	0	0.13	0.17	0	0	0
ENSG00000131043.11	AAR2	60.85	60.01	62.69	64.22	54.49	42.25	52.3	45.87	46.92	44.48	50.08	26.21	41.32	41.56	53.16	52.98
ENSG00000205002.3	AARD	0.73	0	0.04	0.06	0.05	0.03	0	0.62	0.02	0	0	0.11	0	0.08	0	0.19
ENSG00000090861.15	AARS	118.2	95.78	107.74	109.52	90.01	81.72	88.75	114.25	74.88	72.01	83.68	23.33	62.91	67.29	103.72	137.91
ENSG00000124608.4	AARS2	12.99	16.39	18.58	22.57	12.99	13.25	15.05	14.77	9.85	10.92	12.06	1.81	9.28	8.11	13.19	17.22
ENSG00000266967.6	AARSD1	69.95	69.43	60.29	84	75.74	67.69	67.54	84.47	55.96	53.07	47.17	64.91	52.38	59.99	57.03	71.82
ENSG00000249038.2	AARSP1	0	0	0	0	0	0	0	0	0	0	0	0	0	0	0	0
ENSG00000157426.13	AASDH	7.68	11.16	6.21	7.41	3.3	4.28	3.9	8.3	2.2	6.48	3.23	1.66	5.85	5.14	5.56	4.68
ENSG00000149313.10	AASDHPPT	78.63	68.74	54.8	63.09	47.65	54	45.08	62.84	48.94	68.38	67.76	29.81	58.8	65	76.82	93.59
ENSG00000008311.14	AASS	6.35	11.59	13.53	14.86	5.71	7.52	7.86	17.94	6.91	8.62	11.05	1.58	7.22	11.94	16.64	49.7
ENSG00000215458.8	AATBC	0	0	0.13	0.06	0	0	0	0	0.12	0.15	0	0	0.14	0	0.01	0.03
ENSG00000275700.4	AATF	55.96	43.67	51.27	56.09	57.8	46.55	54.76	73.46	39.74	35.73	39.86	34.52	46.18	34.72	48.76	78.91
ENSG00000181409.12	AATK	1.44	2.41	3.75	3.01	0.9	0.95	0.9	1.65	2.34	2.24	3.17	0.54	1.4	0.8	0	0.02
ENSG00000254180.1	AB015752.1	0	0	0	0	0	0	0	0	0	0	0.24	0	0	0	0	0
ENSG00000281376.1	ABALON	1.12	1.79	1.11	1.59	1.51	1.92	1.81	1.73	2.35	1.36	0.95	4.68	2.61	2.69	0.75	2.1
ENSG00000183044.11	ABAT	2.9	1.17	1.82	1.39	0.74	0.41	1.69	1.27	1.79	2.64	2.37	0.66	2.06	3.29	0.76	0.57
ENSG00000283544.1	ABBA01000935.2	0	0	0	0	0	0	0	0	0	0	0	0	0	0	0	0
ENSG00000265233.1	ABBA01006766.1	0	0	0	0	0	0	0	0	0	0	0	0	0	0	0	0
ENSG00000165029.15	ABCA1	2.42	4.59	6.37	6.44	4.18	8.11	7.33	11.3	1.31	2.09	2.27	1.14	7.44	11.07	3.76	1.03
ENSG00000154263.17	ABCA10	0.1	0.13	0.02	0.13	0.02	0.17	0.12	0.79	0	0.05	0.07	0.06	0.18	0.65	0.02	0.01
ENSG00000251595.7	ABCA11P	3.4	3.4	3.34	3.77	3.01	3.2	2.6	4.96	2.86	3.9	2.62	1.94	2.46	3.45	2.06	2.28
ENSG00000144452.14	ABCA12	0	0	0	0	0	0	0	0	0	0	0	0	0	0	0.06	0.02
ENSG00000179869.14	ABCA13	0.01	0.11	0	0	0	0	0.42	0	0.02	0.05	0.01	0.05	0.1	0.1	0.03	0
ENSG00000238098.9	ABCA17P	0	0.08	0	0.16	0	0	0	0	0	0	0.03	0	0.23	0.03	0	0
ENSG00000107331.16	ABCA2	1.79	2.34	2.94	1.7	0.08	0.3	0.91	0.72	2.29	6.5	3.8	1.07	2.02	3	1.99	1.72
ENSG00000167972.13	ABCA3	23.69	6.87	26.29	14.89	15.04	13.29	36.33	9.35	44.73	45.7	71.55	11.59	37.86	46.48	1.19	1.2
ENSG00000198691.12	ABCA4	3.61	1.49	1.16	2.17	5.11	5.05	6.14	2.89	2.73	1.9	2.31	4.72	7.46	13.41	0.21	0.44
ENSG00000154265.15	ABCA5	7.47	6.02	3.3	2.44	9.96	12.48	11.34	7.89	9.12	6.34	6.55	17.77	11.66	8.82	0.75	1.82
ENSG00000154262.12	ABCA6	0.35	0.48	0.96	0.4	0.96	0.66	1.59	0.83	0.17	1.11	0.37	0.52	0.95	1.62	0	0
ENSG00000064687.12	ABCA7	3.48	3.33	3.65	4.34	0.36	1.91	2.01	0.87	1.68	2.21	3.33	2.4	1.03	1.91	0.54	0.61
ENSG00000141338.13	ABCA8	0	0	0.22	0.36	1.84	1.41	0.58	0.98	0.02	0.39	0.91	0.03	0.71	1.76	0	0
ENSG00000154258.16	ABCA9	0.11	0.01	0.16	0.08	0.08	0.17	0.46	0.31	0.27	0.56	0.23	0.94	1.47	0.61	0	0.01
ENSG00000231749.3	ABCA9-AS1	0	0	0	0	18.48	10.74	19.58	0.51	18.08	7.86	9.28	61.47	42.72	5.61	0	0
ENSG00000085563.14	ABCB1	0.53	0	0.42	0.44	0.4	0.37	0.52	0.26	0.03	0.04	1.19	0.4	0.41	1.08	0.97	0.02
ENSG00000135776.4	ABCB10	20.69	18.57	18.84	20.63	20.83	15.13	20.19	22.07	20.83	20.58	24.41	7.57	22.29	16.1	13.16	24.97
ENSG00000274099.1	ABCB10P1	0.17	0	0.2	0.17	0.08	0	0.06	0	0	0	0	0.05	0	0.14	0	0
ENSG00000261524.1	ABCB10P3	0	0	0.02	0	0.32	0.15	0.05	0	0.04	0	0.06	0.15	0.17	0.08	0	0
ENSG00000260053.2	ABCB10P4	0	0	0	0	0	0	0.05	0.02	0	0	0	0.14	0	0	0	0
ENSG00000073734.9	ABCB11	0.14	0.19	0.24	0.1	0.03	0.03	0.06	0.12	0.08	0.03	0.09	0.11	0.11	0.1	0.27	0.14
ENSG00000005471.17	ABCB4	0.38	0.14	0.48	0.08	0.43	0.54	0.09	0.62	0.56	0.17	0	0.52	0.6	1.92	0	0.06
ENSG00000004846.16	ABCB5	0	0	0	0	0	0	0.02	0	0.09	0	0	0.03	0.07	0.05	0	0
ENSG00000115657.13	ABCB6	4.53	7.83	9.82	9.19	4.95	4.84	5.44	3.58	9.96	7.78	8.57	3.01	3.09	3	10.97	11.28
ENSG00000131269.16	ABCB7	11.67	12.43	10.58	13.61	12.3	15.77	11.1	14.79	5.79	6.71	5.54	4.35	7.86	4.87	5.41	7.35
ENSG00000197150.12	ABCB8	12.84	13.24	19.64	16.58	15.29	12.87	18.05	10.63	20.97	12.48	24.14	6.68	9.36	11.56	39.27	29.64
ENSG00000150967.17	ABCB9	2.8	3.72	2.34	3.57	2.23	2.36	5.88	2.06	5.44	2.89	7.05	5.78	13.05	13.47	5.7	4.99
ENSG00000103222.18	ABCC1	11.97	11.67	14.96	15.07	7.25	6.94	8.31	8.84	7.61	9.6	11.9	4.2	9.45	14.52	8.68	12.58
ENSG00000124574.14	ABCC10	26.27	25.85	28.65	26.76	26.68	25.46	25.28	19.08	20.42	19.22	28.89	15.72	20.23	24.95	17.36	13.86
ENSG00000121270.15	ABCC11	0.08	0.24	0.11	0.24	0.14	0.17	0.21	0.05	0.16	0.36	0.14	0.02	0.1	0.11	0.39	0.16
ENSG00000140798.16	ABCC12	0	0	0	0	0	0	0	0	0	0	0.03	0.01	0	0	0.04	0
ENSG00000243064.8	ABCC13	0	0	0	0	0	0	0	0	0.04	0.02	0	0.04	0	0.05	0	0
ENSG00000023839.11	ABCC2	0.43	1.72	0.93	0.78	0.71	1.84	0.78	1.83	0.47	0.45	0.61	1.2	0.8	1.4	0.11	0.34
ENSG00000108846.15	ABCC3	0	0.58	0	0.18	0.2	0	0	0.07	0	0	0.19	0.02	0.03	0	0.24	0.07
ENSG00000125257.14	ABCC4	16.27	23.04	23.3	24.3	7.15	13.69	13.59	19.42	5.49	9.26	13.58	1.35	10.74	9.71	26.19	24.73
ENSG00000114770.16	ABCC5	30.12	25.34	31.21	25.49	21.7	24.81	22.43	22.33	12.58	15.36	14.46	7.66	15.63	21.11	15.99	13.76
ENSG00000223882.1	ABCC5-AS1	0	0	0	0	0	0	0	0	0	0	0	0	0	0	0	0
ENSG00000091262.15	ABCC6	0.41	0.61	1.65	0.69	0.08	0.23	0.23	0.05	1.03	0.41	1.09	0.1	0.04	0.09	2.07	0.09
ENSG00000256340.8	ABCC6P1	0.98	1.21	2.08	0.62	0	0	0.17	0	1.36	1.67	0.82	0.09	0	0	0.68	0
ENSG00000255277.3	ABCC6P2	0.19	0.14	0.34	0	0	0	0	0	0	0.95	0.53	0	0	0	0.9	0.1
ENSG00000006071.13	ABCC8	0	0	0	0	0	0	0	0	0	0	0	0	0	0	0.03	0
ENSG00000069431.11	ABCC9	0.08	0.22	0.13	0.2	0.14	0.11	0.44	0.22	0.16	0.22	0.22	0.23	0.13	0.22	0.08	0.24
ENSG00000101986.11	ABCD1	8.67	10.14	12.63	12.12	3.32	4.17	7.46	5.13	4.65	5.42	4.31	3.29	4.1	5.66	10.52	3.39
ENSG00000215151.4	ABCD1P2	0	0	0	0	0	0	0	0	0	0	0	0	0	0	0	0
ENSG00000261233.2	ABCD1P3	0	0	0	0	0	0	0	0	0	0	0	0	0	0	0	0
ENSG00000225293.1	ABCD1P4	0	0	0	0	0	0	0	0	0	0	0	0	0	0	0	0
ENSG00000214330.4	ABCD1P5	0	0	0	0	0	0	0	0	0	0	0	0	0	0	0	0
ENSG00000173208.3	ABCD2	0	0.04	0.3	0.11	0	0	0	0	0	0.02	0	0	0	0.21	0.57	0.65
ENSG00000117528.12	ABCD3	43.31	39.96	42.18	34.7	37.03	38.84	46.91	49.69	33.13	45.11	41.12	16.43	56.15	53.16	33.88	42.22
ENSG00000119688.20	ABCD4	84.68	106.57	89.95	101.46	72.47	82.79	78.28	103.99	90.68	86.08	88.93	50.34	79	95.36	27.56	31.74
ENSG00000164163.10	ABCE1	125.69	102.16	79.77	100.81	111.7	106	96.53	158.61	76.53	123.74	108.6	19.7	108.16	106.31	133.72	209.82
ENSG00000204574.12	ABCF1	51.32	52.56	66.49	67.36	75.67	67.09	84.31	98.03	74.18	62.44	64.86	60.4	74.54	68.65	35.51	56.61
ENSG00000033050.8	ABCF2	49.58	38.99	41.85	46.04	55.97	46.58	47.07	45.91	38.8	42.09	50.87	23.36	40.55	46.45	41.82	57.93
ENSG00000242159.1	ABCF2P1	0	0	0	0	0	0	0	0	0	0	0	0	0	0	0	0
ENSG00000228769.1	ABCF2P2	0	0	0	0	0	0	0	0	0	0	0	0	0	0	0	0
ENSG00000161204.11	ABCF3	58.55	58.46	57.05	53.3	76.1	67.92	64.73	61.68	56.53	51.1	55.36	42.1	58.32	64.12	32.24	44.14
ENSG00000160179.18	ABCG1	46.57	34.92	47.49	24.2	28.09	33.17	35.64	20.22	24.68	25.76	19.3	16.27	25.22	44.62	0.5	0
ENSG00000118777.11	ABCG2	36.9	15.62	40.91	36.28	132	172.72	127.18	140.17	6.87	5.73	1.71	4.7	33.42	26.03	0.57	1.28
ENSG00000172350.9	ABCG4	0	0.08	0	0.17	0	0	0.13	0	0	0.1	0.48	0	0	0	0.17	0.06
ENSG00000138075.12	ABCG5	0.02	0	0	0	0	0	0	0	0	0	0	0	0	0	0	0.09
ENSG00000143921.7	ABCG8	0	0	0	0.01	0	0.01	0.02	0	0	0	0.04	0	0	0.03	0	0
ENSG00000143994.13	ABHD1	0.45	0	0.1	0.18	0	0	0.59	0.5	0.04	0	0.04	0	0.06	0.05	0	0
ENSG00000144827.8	ABHD10	39.27	38.29	40.87	34.61	36.97	39.54	32.21	42.96	24.65	32.43	34.38	11.48	33.73	31.53	40.45	39.66
ENSG00000106077.18	ABHD11	9.16	8.56	9.94	16.79	5.87	5.81	7.25	7.21	19.91	14.87	20.14	8.95	7.63	8.41	19.55	23.11
ENSG00000225969.2	ABHD11-AS1	0.21	0.61	1.47	0.7	0.52	0	0.21	0	3.13	1.53	2.13	3.1	1.38	0.38	2.51	0.53
ENSG00000100997.18	ABHD12	88.53	65.13	78.81	90.43	80.64	58.69	88.96	81.7	59.88	68.24	86.03	33.29	72.31	66.95	112.73	120.55
ENSG00000131969.14	ABHD12B	0	0	0	0	0	0.41	0	0.09	0.06	0	0.01	0.02	0.43	0	0.11	0.16
ENSG00000139826.5	ABHD13	20.58	18.32	16.02	16.8	14.91	16.68	12.08	19.74	9.92	16.43	11.92	5.36	13.35	14.32	11.45	14.44
ENSG00000248487.8	ABHD14A	20.7	30.3	21.81	26.32	11.27	13.53	18.8	11.83	25.93	25.75	23.15	20.38	14.84	16.53	28.2	16.56
ENSG00000114786.16	ABHD14A-ACY1	3.74	2.66	0.59	1.43	1.47	0.95	2.43	0.48	0.86	2.54	1.82	2.89	1.32	2.16	1.67	0.91
ENSG00000114779.19	ABHD14B	9.59	12.7	12.85	16.21	2.27	3.14	3.55	4.03	14.34	8.69	10.63	3.34	3.42	2.43	8.38	4.99
ENSG00000168792.4	ABHD15	1.32	2.54	3.62	2.56	2.7	2.42	3.1	1.96	4.55	5.24	6.68	2.41	3.85	4.42	2.57	1.23
ENSG00000264031.1	ABHD15-AS1	0	0	0	0	0	0	0	0	0	0	0	0	0	0	0	0
ENSG00000204427.11	ABHD16A	69.36	74.34	76.2	74.5	64.92	76.98	75.12	53.49	64.21	64.13	71.96	38.59	59.61	60.18	50.57	28.74
ENSG00000183260.7	ABHD16B	0.73	1.97	1.6	0.18	0.35	0.08	0.48	0	0.29	0	1.57	0	0	0	0.68	0
ENSG00000129968.15	ABHD17A	142.96	174.84	190.24	179.17	183.36	233.01	241.79	123.04	202.04	126.76	184.23	230.68	162.67	159.15	63.12	34.15
ENSG00000198658.4	ABHD17AP1	0.06	0	0.07	0	0.08	0	0	0	0	0	0.07	0	0	0	0	0
ENSG00000250536.1	ABHD17AP3	0.05	0.07	0	0.05	0	0	0	0	0.09	0	0.04	0	0	0	0.05	0
ENSG00000229107.2	ABHD17AP4	0	0.09	0.14	0.17	0	0.01	0	0.07	0.06	0.13	0	0	0.02	0	0	0
ENSG00000263366.2	ABHD17AP5	0	0	0.07	0	0	0	0.12	0	0.12	0	0	0	0	0.06	0	0
ENSG00000226981.2	ABHD17AP6	0	0	0	0.05	0	0	0	0	0	0	0	0.12	0	0	0	0
ENSG00000260864.1	ABHD17AP7	0	0	0	0	0	0	0	0	0	0	0	0	0	0	0	0
ENSG00000260540.2	ABHD17AP8	0	0	0	0	0	0	0	0	0	0	0	0	0	0	0	0
ENSG00000261536.2	ABHD17AP9	0	0	0	0	0	0	0	0	0	0	0	0	0	0	0	0
ENSG00000107362.13	ABHD17B	38.02	42.14	37.23	35.74	42.04	42.12	40.58	49.58	27.14	31.89	30.85	14.15	42.99	53.16	29.9	23.8
ENSG00000136379.11	ABHD17C	7.95	6.14	6.18	11.75	3.43	3.41	5.39	5.17	5.9	6.85	9.19	2.5	5.18	5.82	7.69	13.64
ENSG00000164074.15	ABHD18	3.99	5.35	4.52	7.57	3.5	2.21	4.02	6.53	4.31	13.44	4.86	1.26	5.77	7.7	4.58	4.56
ENSG00000140526.17	ABHD2	19.72	15.54	14.01	11.98	15.83	14.81	16.7	15.1	8.14	13.13	17.59	3.63	10.5	16.26	19.02	30.96
ENSG00000158201.9	ABHD3	7.49	8.01	6.17	10.67	7.29	5.94	7.39	8.22	3.02	4.47	8.05	3.38	6.72	7.06	9.9	15.21
ENSG00000100439.10	ABHD4	62.86	50.78	59.76	58.36	43.59	40.37	33.89	45.28	29.7	33.91	37.49	24.1	32.37	44.24	21.85	19.27
ENSG00000011198.9	ABHD5	25.57	24.62	21.23	19.79	16.98	16.81	13.66	18.43	14.99	14.22	13.35	10.48	14.53	15.06	15.01	15.2
ENSG00000163686.14	ABHD6	24.34	24.45	28.67	27.46	26.63	39.84	29.7	35.82	20.34	25.11	23.77	10.54	29.92	24.83	6.71	5.53
ENSG00000127220.5	ABHD8	9.61	7.14	11.5	9.49	7.93	10.59	9.67	5.15	8.3	5.64	7.37	8.61	6.52	8.24	5.16	2.17
ENSG00000136754.17	ABI1	65.11	52.5	53.68	54.96	64.34	61.67	51.44	60.39	47.26	53.87	63.85	17.32	53.86	69.46	34.8	44.89
ENSG00000271484.1	ABI1P1	0	0	0	0	0	0	0	0	0	0	0	0	0	0	0	0
ENSG00000138443.15	ABI2	83.89	68.75	74.36	85.12	84.18	82.51	71.34	105.35	50.05	62.98	71.32	24.84	80.29	90.85	53.43	62.95
ENSG00000108798.8	ABI3	16.54	20.18	21.14	16.26	20.23	13.96	16.08	19.16	9.6	6.14	7.92	2.25	2.16	1.54	5.27	6.94
ENSG00000154175.16	ABI3BP	0	1.65	1.85	0.13	0.13	1.11	0.19	0.1	0	0.05	0.04	0.09	0.08	0.03	0.03	0.13
ENSG00000097007.17	ABL1	33.2	30.66	40.38	40.2	28.27	28.06	43.04	36.9	27.58	27.71	46.52	14.39	34.93	53.79	15.18	27.54
ENSG00000143322.19	ABL2	28.22	20.62	19.84	15.25	17.67	15.5	17.5	26.39	16.27	12.4	18.53	20.65	22.46	38.24	7.86	10.88
ENSG00000099204.19	ABLIM1	351.53	351.65	294.02	332.98	139.45	225.24	256.27	400.75	106.98	182.74	133.16	27.5	303.8	511.53	3.43	11.73
ENSG00000163995.19	ABLIM2	0	0.15	0.78	0.89	3.31	0.28	1.95	0.17	2.56	1.19	1.17	0.78	1.5	0.89	0.16	0.15
ENSG00000173210.19	ABLIM3	14.35	4.78	16.06	10.26	19.57	18.02	24.58	18.77	15.39	14.45	13.9	6.64	17.88	7.54	7.94	3.63
ENSG00000175164.14	ABO	0.18	0.2	0.75	1.53	0	0	0	0	0.32	0.12	0.4	0	0	0	1.01	0.83
ENSG00000159842.15	ABR	12.99	12.9	18.64	12.38	5.87	5.05	7.99	6.01	10.82	12.49	15.25	5.82	4.1	10.97	20.38	19.32
ENSG00000174429.3	ABRA	0	0	0	0.11	0	0.02	0	0	0	0	0	0	0	0	0	0
ENSG00000146386.7	ABRACL	381.1	295.62	233.87	370.17	400.69	349.81	284.38	376.2	344.4	376.08	328.36	560.7	357.54	256.11	138.77	144.52
ENSG00000163322.13	ABRAXAS1	7.71	7.8	8.27	10.44	5.84	6.51	5.45	13.42	2.41	4.52	4.59	1.73	4.38	3.58	8.26	9.03
ENSG00000165660.7	ABRAXAS2	20.16	14.86	13.29	15.03	17.82	15.41	14.83	20.56	12.07	13.02	12.92	5.4	13.95	16.99	13.81	20.63
ENSG00000146109.4	ABT1	57.47	61.89	58.37	60.37	59.46	61.84	51.16	57.71	47.48	41.91	38.55	35.12	35.74	34.23	44.02	41.45
ENSG00000250496.2	ABT1P1	0	0	0	0.07	0	0	0	0	0.07	0	0	0	0	0	0	0
ENSG00000114626.17	ABTB1	2.8	7.03	7.32	10.7	0.64	1.18	0.62	0.75	5.18	5.28	9.23	0.39	1.1	0.58	4.29	2.97
ENSG00000166016.5	ABTB2	55.4	12.54	14.16	15.31	39.49	33.52	42.66	16.61	16.81	11.15	15.9	14.58	25.7	36.13	2.2	2.44
ENSG00000260246.1	AC000032.1	0	0	0	0	0	0	0	0	0	0	0	0.26	0	0	0	0.35
ENSG00000282816.1	AC000035.1	0	0	0	0	0	0	0	0	0	0	0	0	0	0	0	0
ENSG00000225929.1	AC000036.1	0	0	0	0	0	0	0	0.08	0.05	0	0	0	0	0	0	0
ENSG00000242156.1	AC000041.1	0	0	0	0	0	0	0	0	0	0	0	0	0	10.1	0	7.91
ENSG00000223665.1	AC000058.1	0	0	0	0	0	0	0	0	0	0	0	0	0	0	0	0
ENSG00000083622.8	AC000061.1	0	0	0	0	0	0	0	0	0	0	0	0	0	0	0	0
ENSG00000225007.1	AC000067.1	0	0	0	0	0	0	0	0	0	0	0	0	0	0	0	0
ENSG00000185065.6	AC000068.1	0.51	1.18	0.1	0.67	0.03	0	0.15	0.35	0.26	0.61	0.23	0.08	0.27	0.65	0.09	0.65
ENSG00000273212.1	AC000068.2	0	0	0	0	0	0	0	0	0	0	0	0	0	0	0	0
ENSG00000273300.1	AC000068.3	0	0.5	0	0	0	0	0	0	0	0.14	0	0	0	0.62	0.08	1.62
ENSG00000230485.1	AC000077.1	0	0	0	0	0	0	0	0	0	0	0	0	0	0	0	0
ENSG00000232926.1	AC000078.1	0	0	0	0	0.12	0	0	0	0	0	0.09	0	0	0	0	0
ENSG00000230194.1	AC000081.1	0	0	0	0	0	0	0	0	0	0	0	0	0	0	0	0
ENSG00000235776.2	AC000089.1	0	0	0	0	0	0	0	0	0	0	0	0	0	0	0	0
ENSG00000270393.1	AC000095.1	0	0	0	0.07	0	0	0	0.18	0	0	0	0	0	0	0	0
ENSG00000283366.2	AC000095.2	0	0	0	0	0	0	0	0	0	0	0	0	0	0	0	0
ENSG00000236340.5	AC000099.1	0	0	0	0	0	0	0	0	0	0	0	0	0	0	0	0
ENSG00000234001.1	AC000111.1	0	0	0	0	0	0	0	0	0	0	0	0	0	0	0	0
ENSG00000237974.1	AC000111.2	0	0	0	0	0	0	0	0	0	0	0	0	0	0	0	0
ENSG00000243107.1	AC000120.1	0	0	0	0	0	0	0.41	0	0	0.06	0	0	0	0.18	0	0
ENSG00000285772.1	AC000120.2	0	0	0	0	0.18	0.19	0	0	0	0	0	0	0	0	0	0
ENSG00000285953.1	AC000120.3	0.82	2.25	0	1.09	1.05	1.48	0	2.16	0.16	1.01	1.83	0.34	0	3.18	0	0.58
ENSG00000224138.1	AC000123.1	0	0	0	0	0.83	0	0	0.19	0	0	0	0.26	0	0.79	0.31	0
ENSG00000279265.1	AC000123.2	0	0	0	0	0	0	0.44	0	0.8	0	0	1.85	0	1.6	0	0.4
ENSG00000280347.1	AC000123.3	0.11	0.18	0.04	0	0.02	0	0.12	0.01	0.12	0.16	0	0.26	0.07	0	0	0.07
ENSG00000226770.1	AC000124.1	0	0	0	0	0	0	0	0	0	0	0	0	0	0	0	0
ENSG00000230820.2	AC000362.1	0	0	0	0	0	0	0	0	0	0	0	0	0	0	0	0
ENSG00000224981.1	AC000367.1	0	0	0	0	0	0	0	0	0	0	0	0	0	0	0	0
ENSG00000241921.1	AC000372.1	0	0	0	0	0	0	0	0	0	0	0	0	0	0	0	0
ENSG00000227249.1	AC000374.1	0	0	0	0	0	0	0	0	0	0	0	0	0	0	0	0
ENSG00000278727.1	AC000403.1	0.34	0.04	0.42	0.23	0.29	0.07	0.59	0.22	0.22	0.37	0.92	0.75	0.9	0.97	0.1	0.04
ENSG00000274898.1	AC001226.1	0	0	0	0	0	0	0	0	0	0	0	0	0	0	0	0
ENSG00000283208.1	AC001226.2	0.36	0.33	0	0.17	0.11	0.25	0.27	0.32	0.04	0	0.18	0.24	0.04	0	0	0.03
ENSG00000272330.1	AC002044.1	0	0	0	0	0	0	0	0	0	0	0	0	0	0	0	0
ENSG00000279591.1	AC002044.2	0.24	0.34	0.06	0.06	0	0.32	0	0	0.06	0	0.38	0.56	0.19	0.06	0.34	0.06
ENSG00000280092.1	AC002044.3	0	0.22	0.17	0	0	0	0	0	0	0	0.14	0	0.33	0.29	0	0
ENSG00000213683.4	AC002056.1	0	0	0.09	0	0.52	0	0	0.29	0.24	0.1	0	0.06	0.09	0.25	0.16	0.26
ENSG00000254499.1	AC002056.2	0	0	0	0	0	0	0	0	0	0	0	0	0	0	0	0
ENSG00000273216.1	AC002059.1	0	0	0	0.37	0.25	0	0	0.68	0.19	0	0	0	0	0	0	0
ENSG00000285697.1	AC002059.2	0	0.26	0.41	0.4	0.11	0.45	0.14	0.43	0.38	0.7	0.28	0.02	0.46	0.36	0	0
ENSG00000225498.1	AC002064.1	0	0	0	0	0	0	0	0	0	0	0.08	0	0	0	0.26	0
ENSG00000234459.1	AC002064.2	0	0	0	0	0	0	0	0	0	0	0	0	0	0	0	0
ENSG00000280440.1	AC002064.3	0	0	0	0	0	0	0	0	0	0	0	0	1	0	0	0
ENSG00000237813.3	AC002066.1	0.1	0	0	0	0	0	0.29	0.43	0	0	0	0	0.63	0.09	0	0
ENSG00000235639.1	AC002069.1	0	0	0	0	0	0	0	0	0	0	0	0	0	0	0	0
ENSG00000270812.1	AC002069.2	0	0	0	0	0	0	0	0	0	0	0	0	0	0	0	0
ENSG00000248636.6	AC002070.1	0.9	3.01	3.15	2.14	3.99	2.87	4.3	2.47	1.03	0.87	3.4	15.29	5.09	2.73	0.17	0.7
ENSG00000285090.1	AC002074.1	0	0.08	0.23	0.16	0	0	0	0	0.05	0	0	0	0	0	0.84	0.51
ENSG00000285964.1	AC002074.2	0	0	0	0	0	0	0	0.11	0.58	0	0	0	0	0	0	0
ENSG00000225898.1	AC002075.1	0	0	0	0	0	0	0	0	0	0	0	0	0	0	0	0
ENSG00000237729.2	AC002075.2	0	0	10.53	0	0	0	0	0	0	3.51	0	0	0	0	0	1.27
ENSG00000234695.1	AC002076.1	0.98	3.28	0.18	0	0	0	0	0.18	1.98	0.58	0.29	0.45	0	0.15	0	0
ENSG00000278388.1	AC002076.2	0	0	0	0	0	0	0	0	0	0	0	0	0	0	0	0
ENSG00000279743.1	AC002090.1	0	0	0	0	0	0	0	0	0	0	0	0	0	0	0	0
ENSG00000265975.1	AC002091.1	0	0	0	0.14	0	0	0	0	0	0	0	0	0	0	0	0
ENSG00000266389.1	AC002091.2	0	0	0	0	0	0.39	0	0	0	0	0	0	0	0	0	0
ENSG00000258924.4	AC002094.1	0.9	1.63	0	2.89	2.53	0	0.05	1.29	1.67	4.09	4.73	1.94	2.3	4.59	5.59	5.3
ENSG00000265618.1	AC002094.2	0	0	0	0	0	0	0	0	0	0	0	0	0	0	0	0
ENSG00000273171.1	AC002094.3	0	0	0	0	0	0	0	0	0	0	0	0	0	0	0	0
ENSG00000277450.1	AC002094.4	0	0	0	0.64	0.87	0	0	0	0	1.55	0	0.85	0.76	0.61	3.73	2.33
ENSG00000279532.1	AC002094.5	0.12	0	0	0.66	0.14	0.31	0	0.13	0.66	0	1.16	0.49	1.51	0	0.66	0
ENSG00000261018.1	AC002101.1	0	0	0	0	0	0	0	0	0	0	0	0	0	0	0	0
ENSG00000267626.1	AC002115.1	0	0	0	0	0	0	0	0	0	0	0	0	0	0	0	0
ENSG00000248101.2	AC002116.1	0	0.01	0.33	0.26	0.23	0	0.45	0.06	0	0.14	0.39	0.44	0	0	0	0
ENSG00000267698.1	AC002116.2	0.11	0	0.12	0	0.14	0.15	0	0.13	0	0.4	0.51	0	0	0.11	0.32	0.44
ENSG00000227979.1	AC002127.1	0	0	0	0	0	0	0	0	0	0	0	0	0	0	0	0
ENSG00000233420.1	AC002127.2	0	0	0	0	0	0	0	0	0	0	0	0	0	0	0	0
ENSG00000268947.1	AC002128.1	0.28	0	0.18	0	0.07	0	0	0	0.05	0	0.05	0.24	0.12	0	0	0.06
ENSG00000271366.1	AC002128.2	0	0	0	0	0	0	0	0	0	0	0	0	0	0	0	0
ENSG00000259242.2	AC002306.1	0	0	0	0	0	0	0	0	0	0	0	0	0	0	0	0
ENSG00000235560.3	AC002310.1	1.75	4.3	1.92	2.24	1.32	1.84	0.87	1.3	0.94	1.15	1.36	1.14	0.66	1.1	0.8	0.59
ENSG00000239791.1	AC002310.2	0.15	0	0	0	0	0.37	0	0	0.2	0	0.46	0	0	0.13	0	0
ENSG00000260494.1	AC002310.3	0	0.53	0.4	0	0	0	0.36	0.1	0.18	0	0.08	0	0	0	0	0.46
ENSG00000260869.1	AC002310.4	0	0	0	0	0	0	0	0	0.62	1.54	0	0	0	0.13	0	0
ENSG00000261459.1	AC002310.5	0.49	0	0	0	0.45	1.35	0.29	0.81	0.89	0.61	0.91	0	0.37	0	0	0
ENSG00000278922.1	AC002310.6	0.3	0.11	0.08	0.11	0.05	0.41	0.25	0.08	0.04	0.14	0.58	0.14	0.24	0.04	0.14	0.23
ENSG00000261433.1	AC002347.1	0	0	0.17	0	0	0	0	0	0	0	0	0	0	0	0	0
ENSG00000263388.1	AC002347.2	0	0	0	0	0	0	0	0	0	0	0	0	0	0	0	0
ENSG00000278993.1	AC002350.1	0.43	0.15	0.5	0.68	0.36	0.51	0.46	0.18	0.67	0.36	1.9	1	0.52	0.71	0.49	0.33
ENSG00000258240.5	AC002351.1	0	0	0	0	0	0	0	0	0	0	0	0	0	0	0	0
ENSG00000232392.1	AC002366.1	0	0	0	0	0	0	0	0	0	0	0	0	0	0	0	0
ENSG00000226436.1	AC002367.1	0	0	0	0	0	0	0	0	0	0	0	0	0	0	0	0
ENSG00000237741.1	AC002368.1	0	0	0	0	0	0	0	0	0	0	0	0	0	0	0	0
ENSG00000257268.1	AC002375.1	0	0	0	0	0	0	0	0	0	0	0	0	0	0	0	0
ENSG00000225676.1	AC002378.1	0	0	0	0	0	0	0	0	0	0	0	0.47	0	0	0	0
ENSG00000228341.1	AC002381.1	0	0	0	0	0	0	0	0	0	0	0	0	0	0	0	0
ENSG00000227863.2	AC002383.1	0	0	0	0	0	0	0	0	0	0	0	0	0	0	0	0
ENSG00000230941.1	AC002386.1	0	0	0	0	0	0	0	0	0	0	0	0	0	0	0	0
ENSG00000267049.1	AC002398.1	0	0	0	0	0	0	0	0	0	0	0	0	0	0	0	0.72
ENSG00000267328.1	AC002398.2	0	0	0	0	0	0	0	0	0	0	0	0	0	0.21	0	0.23
ENSG00000261528.2	AC002400.1	0	0	0	0	0	0	0	0	0	0	0	0	0	0	0	0
ENSG00000236472.1	AC002401.1	0	0	0	0	0	0	0	0	0	0	0	0	0	0	0	0
ENSG00000250282.1	AC002401.2	0	0	0	0	0	0	0	0	0	0	0	0	0	0	0	0
ENSG00000275025.1	AC002401.3	0	0	0.27	0	0	0	0	0	0	0	0	0	0	0	0	0
ENSG00000276851.1	AC002401.4	0	0.38	0	0	0	0	0	0	0.13	0	0.84	0.56	0	0	0.25	0
ENSG00000283638.2	AC002407.1	0.03	0.02	0	0.01	0	0.03	0	0.06	0.03	0	0	0.11	0.06	0	0	0
ENSG00000253927.1	AC002428.1	0	0	0	0	0	0	0	0	0	0	0	0	0	0	0	0
ENSG00000254239.1	AC002428.2	0	0	0	0	0	0	0	0	0	0	0	0	0	0	0	0
ENSG00000231153.1	AC002429.1	0	0	0	0	0	0	0	0	0	0	0	0	0	0	0	0
ENSG00000236197.3	AC002429.2	0	0	0	0	0	0	0.08	0.09	0	0.07	0.02	0.02	0.02	0	0	0
ENSG00000231170.5	AC002451.1	0	0	0.45	0	0	0.19	1.57	0	1.32	0	0.15	0.49	0.09	0	0	0
ENSG00000279525.1	AC002451.2	0	0.03	0	0	0	0	0	0	0.09	0	0.09	0.04	0.02	0	0.02	0
ENSG00000237819.5	AC002454.1	7.06	3.28	0.34	2.23	1.97	2.29	6.09	3.55	6.93	12.94	17.07	4.76	7.27	10.92	2.59	3.47
ENSG00000223969.5	AC002456.1	0.65	0	0	0.64	0	0	0	0	0.55	0	0.61	0	0	1.09	0.42	0.61
ENSG00000251154.1	AC002456.2	0	0	0	0	0	0	0	0	0	0	0	0	0	0	0	0
ENSG00000249317.1	AC002460.1	0	0	0	0	0	0	0	0	0	0	0	0	0	0	0	0
ENSG00000223646.1	AC002463.1	0	0	0	0	0	0	0	0	0	0	0	0	0	0	0	0
ENSG00000260188.1	AC002464.1	0	0	0	0	0	0	0	0	0	0	0	0	0	0	0	0
ENSG00000238202.1	AC002465.1	0	0	0	0	0	0	0	0	0	0	0	0	0	0	0	0
ENSG00000241764.3	AC002467.1	6.06	2.02	4.21	5.16	6.04	7.31	4.63	4.85	6.08	4.12	8.18	9.86	9.38	6.63	2.51	1.42
ENSG00000272829.1	AC002470.1	0.97	3.22	0.73	0.58	0.39	0	1.34	0	0.29	1.09	1.12	0.21	1.36	0.86	4.04	2.28
ENSG00000285314.1	AC002470.2	0	0	0	0	0	0	0	0	0	0	0.4	0	0	0	0	0
ENSG00000226872.1	AC002472.1	0	0	0	0	0	0	0	0	0	0	0	0	0	0	0	0
ENSG00000284060.1	AC002472.2	0	0.21	0	0	0	0	0	0	0	0	0.18	0.2	0	0	0	0.31
ENSG00000284130.1	AC002472.3	0	0	0	0	0	0	0	0	0	0	0	0	0	0.11	0	0
ENSG00000284665.1	AC002472.4	0	0	0	0	0	0	0	0	0	0	0	0	0	0	0	0
ENSG00000232759.1	AC002480.1	0	0.83	0.04	0	0.16	0.66	2.22	0.43	0.26	0.52	0.36	1.37	1.91	3.16	0.15	0.02
ENSG00000232949.1	AC002480.2	0	0.42	0	0	1.07	0.39	0	0	0.27	1.21	0.13	1.21	0.94	0.96	0.14	0
ENSG00000223866.1	AC002486.1	0	0	0	0	0	0	0.34	0	0	0	0	0	0	0	0	0
ENSG00000231525.1	AC002486.2	0.13	0	0	0	0.8	0	0.13	0	0.12	0	0	0.09	0	0.12	0	0
ENSG00000270425.1	AC002487.1	0	0	0	0	0	0	0	0	0	0	0	0	0	0	0	0
ENSG00000214111.3	AC002504.1	0	0	0	0	0	0	0	0	0	0	0	0	0	0	0	0
ENSG00000232680.2	AC002511.1	0	0	0	0	0	0	0	0	0	0	0	0	0	0	0	0
ENSG00000233214.1	AC002511.2	0	0	0	0	0	0	0	0	0	0	0	0	0	0	0	0
ENSG00000283479.1	AC002511.3	0	0	0	0	0	0	0	0	0	0	0	0	0	0	0	0
ENSG00000259810.2	AC002519.1	0	0	0.03	0	0	0	0	0	0	0	0	0.02	0.13	0.02	0	0
ENSG00000261457.3	AC002519.2	0	0	0	0	0	0	0	0	0	0	0	0	0	0	0	0
ENSG00000233247.3	AC002524.1	0	0	0	0	0	0	0	0	0	0	0	0	0	0	0	0
ENSG00000279314.1	AC002525.1	0	0	0	0	0	0	0.03	0	0	0	0	0.02	0	0	0.03	0
ENSG00000279067.1	AC002540.1	0	0	0	0	0	0	0	0	0	0	0	0	0	0	0	0.16
ENSG00000227532.1	AC002542.1	0	0	0	0	0	0	0	0	0	0	0	0	0	0	0	0
ENSG00000235945.1	AC002543.1	0.05	0	0	0	0	0	0	0.41	0	0	0	0	0	0	0	0
ENSG00000267184.1	AC002545.1	0	0	0	0	0	0	0	0	0	0	0	0	0	0	0	0
ENSG00000267653.1	AC002546.1	0	0	0.29	0	0	0	0.27	0	0	0	0	0	0	0	0	0
ENSG00000261312.1	AC002550.1	0.22	0.24	0	0.46	0	0	0	0.49	0.45	0.11	0	0.25	0	0.07	0.25	0
ENSG00000276571.1	AC002550.2	0	0	0	0.29	0	0	0	0	0	0.73	0.28	0	0.34	0	0	0
ENSG00000261736.1	AC002551.1	0	0	0	0	0	0	0	0	0	0	0	0	0	0	0	0
ENSG00000227782.2	AC002553.1	0	0.23	0	0	0	0	0.08	0.09	0.22	0.09	0.28	0	0	0.3	0	0
ENSG00000275413.1	AC002553.2	0	0	0.65	0	0	0	0	0	1.44	0	0	1.01	0.58	0.95	0.48	0
ENSG00000239291.1	AC002558.1	0.08	0.11	0	0.22	0.19	0.11	0.23	0.09	0.37	0	0.5	0.62	0.51	0.08	0.15	0.16
ENSG00000261872.1	AC002558.2	0	0	0	0.29	0	0	0.31	0	0.1	0	0	0	0.45	0.2	0	0.31
ENSG00000262265.2	AC002558.3	0.05	0	0.05	0.05	0	0.21	0.2	0.14	0.05	0	0	1.04	0.14	0.03	0.12	0.11
ENSG00000255692.1	AC002563.1	0	0	0	0	0	0	0	0	0	0	0	0	0	0	0	0
ENSG00000267005.1	AC002984.1	0	0	0	0	0	0	0	0	0	0	0	0.31	0	0	0	0
ENSG00000268193.5	AC002985.1	0.48	0	0	0	0.35	0	0.11	0.25	0	0.14	0.11	0.34	0.63	0	0.41	0
ENSG00000257767.2	AC002996.1	6.55	19.16	35.24	17.3	12.07	5.54	11.57	11.15	10.01	27.69	21.69	3.44	14.62	20.06	36.83	36.21
ENSG00000235461.1	AC003001.1	0	0	0	0	0	0	0	0	0	0	0	0	0	0	0	0
ENSG00000276391.1	AC003001.2	0	0	0	0	0	0	0	0	0	0	0	0	0	0	0	0
ENSG00000268133.1	AC003002.1	0	0	0	0	0	0	0	0	0.46	0	0	0	0	0	0	0
ENSG00000268533.1	AC003002.2	0	0	0	0	0	0	0	0	0	0	0	0	0	0	1.79	0
ENSG00000269533.5	AC003002.3	0	0.67	0.37	0.77	0.41	0.02	0.14	0.95	0	1.46	2.01	0.11	0.45	0.54	0	0
ENSG00000268107.5	AC003005.1	0	0.26	0.21	0	0.17	0.19	0	0	0.18	0.2	0	0	0.22	0	0	0
ENSG00000268266.1	AC003005.2	0	0	0	0.29	0.38	0	0	0	0	0	0.14	0	0	0	0	0
ENSG00000269026.2	AC003006.1	0	0	0	0	0	0	0	0	0	0	0	0	0	0.83	0	0
ENSG00000262011.1	AC003009.1	0	0	0	0	0	0	0	0	0	0	0	0	0	0	0	0
ENSG00000212663.2	AC003035.1	2.24	2.23	2.07	2.58	2.35	2.72	1.79	2.45	2.32	1.84	1.38	2.35	1.23	3.42	3.18	3.79
ENSG00000233535.1	AC003035.2	0	0	0	0	0	0	0	0	0	0	0	0	0	0	0	0
ENSG00000267211.1	AC003043.1	0	0	0	0	0	0	0	0	0	0	0	0	0	0	0	0
ENSG00000285486.1	AC003043.2	0	0	0	0	0	0	0	0	0	0	0	0	0	0	0	0
ENSG00000214684.2	AC003045.1	0	0	0	0	0	0	0	0	0	0	0	0	0	0	0	0
ENSG00000267344.1	AC003070.1	0	0	0	0	0	0	0	0	0	0	0	0	0	0.41	0	0
ENSG00000267446.1	AC003070.2	0	0	0	0	0	0	0	0	0	0	0	0	0	0	0	0
ENSG00000285757.1	AC003070.7	0	0	0	0	0	0	0	0	0	0	0	0	0	0	0	0
ENSG00000225971.1	AC003071.1	0	0	0	0	0	0	0	0	0	0	0	0	0	0	0	0
ENSG00000226573.1	AC003071.2	0	0	0	0	0	0	0	0	0	0	0	0	0	0	0	0
ENSG00000250318.1	AC003072.1	0.37	0	0	0	0.3	0.33	0.36	0	1.04	0.15	0.77	0.68	0.53	0.47	0	0.24
ENSG00000234358.1	AC003080.1	0	0	0	0	0	0	0	0	0	0	0	0	0	0	0	0
ENSG00000234826.1	AC003084.1	0	0	0	0	0	0	0	0	0	0	0	0	0	0	0	0
ENSG00000227930.1	AC003087.1	0	0	0	0.34	0	0	0	0	0	0	0	0	0	0	0	0
ENSG00000236453.5	AC003092.1	0.71	1.08	2.07	0.91	0.14	0	0	0.2	0.66	0	1.29	1.94	0	0.17	5.22	1.82
ENSG00000236938.1	AC003092.2	0.24	0	0	0	0	0	0	0	0	0	0	0.31	0	0	0	0
ENSG00000267604.1	AC003098.1	0	0	0	0	0	0	0	0	0	0	0	0	0	0	0	0
ENSG00000228768.3	AC003101.1	0	0	0	0	0	0	0	0	0	0	0	0	0	0	0	0
ENSG00000278546.1	AC003101.2	0.48	0.34	0	0.44	0	0	0	0	0	0	0	0	0	0	0.22	0.22
ENSG00000278977.1	AC003101.3	0	0	0	0	0	0	0	0	0	0.09	0	0	0	0	0	0
ENSG00000260793.2	AC003102.1	0.08	0.08	0.14	0.03	0	0	0	0	0	0	0.25	0	0	0.13	0.27	0.03
ENSG00000237994.1	AC003659.1	0	0	0	0	0	0	0	0	0	0	0	0	0	0	0	0
ENSG00000227042.1	AC003666.1	0	0	0	0	0	0	0.24	0	0	0	0	0	0	0	0	0
ENSG00000237539.1	AC003669.1	0	0	0	0	0	0	0	0	0	0	0	0	0	0	0	0
ENSG00000279159.1	AC003681.1	0.03	0.02	0.01	0.01	0.02	0.02	0.01	0.04	0.02	0.03	0.02	0.03	0	0.02	0.03	0.06
ENSG00000268392.1	AC003682.1	0	0	0	0	0	0	0	0	0	0	0	0	0	0	0	0
ENSG00000228543.1	AC003684.1	0	0	0	0	0	0	0	0	0	0	0	0	0	0	0	0
ENSG00000229012.1	AC003685.1	0	0	0	0	0	0	0	0	0	0	0	0	0	0	0	0
ENSG00000231619.1	AC003685.2	0	0	0	0	0	0	0	0	0	0	0	0	0	0	0	0
ENSG00000257807.1	AC003686.1	0	0	0	0	0	0	0	0	0	0	0	0	0	0	0	0
ENSG00000264598.1	AC003687.1	0	0	0	0	0	0	0	0	0	0	0	0	0	0	0	0
ENSG00000262302.1	AC003688.1	0	0	0	0	0	0	0	0	0	0	0	0.16	0	0	0	0
ENSG00000263342.1	AC003688.2	0	0	0	0	0	0	0	0	0	0	0	0	0	0	0	0
ENSG00000285785.1	AC003950.1	0	0	0	0	0	0	0	0	0	0	0	0	0	0	0	0
ENSG00000268564.1	AC003956.1	0	0	0	0	0	0	0	0	0	0	0	0	0	0	0	0
ENSG00000279825.1	AC003957.1	0.01	0.04	0.04	0.04	0	0	0	0.31	0	0	0.06	0.01	0.17	0.17	0.04	0
ENSG00000108516.5	AC003958.1	0	0	0	0	0	0	0	0	0	0	0	0	0	0	0	0
ENSG00000234859.5	AC003958.2	0	0	0	0	0	0	0	0	0	0	0	0	0	0	0	0
ENSG00000263280.1	AC003965.1	0.42	0	0	0.4	0.39	1.13	0.1	0	0.1	0.25	0.38	0.37	0.34	0	0	0
ENSG00000263325.1	AC003965.2	0	0	0	0	0	0	0	0	0	0	0	0	0	0	0	0
ENSG00000269199.1	AC003973.1	0	0	0	0	0	0	0	0	0	0	0	0	0	0	0	0
ENSG00000269504.1	AC003973.2	0	0	0	0	0	0	0	0	0	0	0	0	0	0	0	0
ENSG00000279377.1	AC003973.3	0	0	0	0	0	0	0	0	0	0	0	0	0	0	0	0
ENSG00000197462.3	AC003975.1	0.43	0	0	0.07	0.09	0	0	0	0	0	0.07	0	0	0	0	0
ENSG00000256695.1	AC003982.1	0	0	0	0	0	0	0	0	0	0	0	0	0	0	0	0
ENSG00000235139.2	AC003984.1	0	0	0	0	0	0	0	0	0	0	0	0	0	0	0	0
ENSG00000233824.1	AC003985.1	0	0	0	0	0	0	0	0	0	0	0	0	0	0	0	0
ENSG00000260951.1	AC003985.2	0	0	0	0.23	0	0	0	0	0	0	0	0	0	0	0	0
ENSG00000229533.1	AC003986.1	0	0	0	0	0	0	0	0	0	0	0	0	0	0	0	0
ENSG00000232821.1	AC003986.2	0	0	0	0.03	0	0	0	0	0	0	0	0	0	0	0.06	0
ENSG00000236536.1	AC003986.3	0	0	0	0	0	0	0	0	0	0	0	0	0	0	0	0
ENSG00000234223.2	AC003988.1	0	0	0	0	0	0	0	0	0	0	0	0	0	0	0	0
ENSG00000227948.4	AC003989.1	0	0	0	0	0	0	0	0	0	0	0	0	0	0	0	0
ENSG00000243621.1	AC003989.2	0	0	0	0	0	0	0	0	0	0	0	0	0	0	0	0
ENSG00000228113.7	AC003991.1	0.1	0.1	0	0.18	0.31	1.04	0	0.28	0.07	0.25	0.23	0.11	0.58	0.67	0.2	0
ENSG00000254003.1	AC003991.2	0	0.39	0.45	0.26	0	0.18	0	0	0.51	0	0.37	0.19	0.29	0	0.13	0.13
ENSG00000282859.1	AC003992.1	0	0	0	0	0	0	0.15	0	0	0	0	0	0	0	0	0
ENSG00000237903.1	AC004000.1	0	0	0	0.46	0	0	0	0	0	0	0.44	0	0	0	0	0
ENSG00000270317.1	AC004004.1	0	0	0	0	0	0	0	0	0	0	0	0	0	0	0	0
ENSG00000228711.1	AC004006.1	0	0	0	0	0	0	0	0	0	0	0	0	0	0	0	0
ENSG00000224322.1	AC004009.1	0	0	0	0	0	0	0	0	0	0	0	0	0	0	0	0
ENSG00000279429.1	AC004009.2	0	0	0	0	0	0.12	0	0	0	0	0	0	0	0	0	0
ENSG00000279655.1	AC004009.3	0	0	0	0	0	0	0	0	0	0	0	0	0	0	0	0
ENSG00000233942.1	AC004012.1	0	0	0	0	0	0	0	0	0.15	0	0	0	0.34	0.15	0	0
ENSG00000229603.1	AC004014.1	0	0	0	0	0	0	0	0	0	0	0	0	0	0	0	0
ENSG00000279043.1	AC004014.2	0	0	0	0	0	0.01	0	0.01	0.12	0	0	0	0.07	0.05	0	0
ENSG00000228751.1	AC004022.1	0	0	0	0	0	0	0	0	0	0	0	0	0	0	0	0
ENSG00000237160.2	AC004022.2	0	0	0	0	0	0	0	0	0	0	0	0	0	0	0	0
ENSG00000261462.1	AC004023.1	0	0	0	0	0	0	0.16	0.06	0	0	0	0	0	0	0	0
ENSG00000257624.1	AC004024.1	0	0	2.34	0	0	0	0	0	0	0	0	0	0	0	0	0
ENSG00000262482.1	AC004034.1	0	0	0	0	0	0	0	0	0	0	0	0	0	0	0	0
ENSG00000230612.3	AC004039.1	0.6	0.12	0.37	0.74	0	0.2	0	0.45	0	0.07	0.31	0.17	0.35	0.08	0.13	0.14
ENSG00000251170.5	AC004052.1	0	0	0	0	0	0	0	0	0	0	0	0	0	0	0	0
ENSG00000248242.1	AC004053.1	0	0	0	0	0	0	0	0	0	0	0	0	0	0	0	0
ENSG00000248984.1	AC004054.1	0	0	0	0	0	0	0	0	0	0	0	0	0	0	0	0
ENSG00000196656.7	AC004057.1	718.51	750.78	643.02	744.8	865.69	852.29	728.15	710.37	818.55	779.23	784.02	1357.34	752.05	687.08	805.74	820.56
ENSG00000251312.2	AC004062.1	0	0	0	0	0	0	0	0	0	0	0	0	0	0	0	0
ENSG00000250670.1	AC004063.1	0	0	0	0	0	0	0	0	0	0	0	0	0	0	0	0
ENSG00000216425.4	AC004066.1	0	0	0	0	0	0	0	0	0	0	0	0	0	0	0	0
ENSG00000250522.1	AC004066.2	0	0	0	0	0	0	0	0	0	0	0	0	0	0	0	0
ENSG00000273447.1	AC004067.1	0	0.28	0	0.37	0	1.17	0.29	0	0	0.93	0.09	0	0.21	0	0	0
ENSG00000251259.1	AC004069.1	0.6	0	0	0.14	0.37	0	0.15	0.17	0.23	0	0.27	0	0	0	0	0
ENSG00000251473.2	AC004069.2	0	0	0	0	0	0	0	0	0	0	0	0	0	0	0	0
ENSG00000237014.1	AC004074.1	0	0	0	0	0	0	0	0	0	0	0	0	0	0	0	0
ENSG00000268163.1	AC004076.1	0.69	0.41	0	0	0	0.18	0.44	1.4	0.83	0	0.22	0	0.77	0	0	0.72
ENSG00000276449.1	AC004076.2	0.16	0.08	0	0.28	0.02	0.26	0.14	0.3	0.07	0.02	0.05	0.29	0.07	0.17	0	0.13
ENSG00000253308.2	AC004080.1	0	0	0	0	0	0	0	0	0	0	0	0	0	0	0	0
ENSG00000253508.1	AC004080.2	0	0	0	0	0	0	0	0.16	0	0	0	0	0.47	0	0	0
ENSG00000257184.3	AC004080.3	0.13	0.34	0.13	0.22	0.14	0.15	0.44	0.79	0	0	0.11	1.08	0.66	0.93	0	0.16
ENSG00000270182.1	AC004080.4	0	0.17	0	0	0	0.15	0.11	0	0	0	0.21	0	0	0.22	0	0
ENSG00000272801.1	AC004080.5	0.4	2.88	1.67	4.51	0	1.49	0.53	0	0	0	1.11	0	1.85	0.89	0.45	0.62
ENSG00000273433.1	AC004080.6	0	0	0	0	0	0.24	0	0.71	0	0	0	0	0	0	0	0
ENSG00000226851.1	AC004112.1	0	0	0	0	0	0	0	0	0	0	0	0	0	0	0	0
ENSG00000213798.3	AC004129.1	0	0	0	0	0	0	0	0	0	0	0	0	0	0	0	0
ENSG00000234406.1	AC004129.2	0	0	0	0	0	0	0	0	0	0	0	0	0	0	0	0
ENSG00000285716.1	AC004129.3	0	0	0	0	0	0	0	0	0	0	0	0	0	0	0	0
ENSG00000271133.5	AC004130.1	2.29	0.3	0	0.27	0.88	1.2	0.79	1	1.2	3.36	1.05	1.99	0.58	1.99	0	1.15
ENSG00000267592.1	AC004134.1	0	0	0	0	0	0	0	0	0	0	0	0	0	0	0	0
ENSG00000263485.1	AC004147.1	0	0	0	0	0	0	0	0	0	0	0	0	0	0	0	0
ENSG00000263571.2	AC004147.2	0	0	0	0	0	0	0	0	0	0	0	0	0	0	0	0
ENSG00000264791.1	AC004147.3	0	0	0	0	0	0	0	0	0	0	0	0	0	0	0	0
ENSG00000265356.2	AC004147.4	0	0	0	0	0	0	0	0	0	0	0	0	0	0	0	0
ENSG00000265775.1	AC004147.5	0	0	0	0	0	0	0	0	0	0	0	0	0	0	0	0
ENSG00000262099.1	AC004148.1	0	0	0	0	0	0	0	0	0	0	0	0	0	0	0	0.28
ENSG00000263272.1	AC004148.2	0.19	0.1	0.48	0.36	0.07	0.7	0.18	1.3	0.75	0.14	0.1	0.98	0.32	0.19	0.36	1.25
ENSG00000267666.2	AC004156.1	0.1	0.08	0	0.06	0.05	0	0.04	0.02	0.08	0.02	0	0.01	0.03	0	0.05	0.03
ENSG00000260664.2	AC004158.1	0	0	0	0	0	0	0	0	0	0	0	0	0	0	0	0
ENSG00000230333.6	AC004160.1	0.34	2.24	0.38	0.39	0.71	0.8	0.64	0.55	2.98	3.32	2.94	1.06	3.52	2.89	0	0
ENSG00000230435.1	AC004160.2	0	0	0	0	0	0	0	0	0.54	0.34	0.38	0	0.46	0	0	0
ENSG00000257494.1	AC004217.1	0	0	0	0	0	0	0	0	0	0	0	0	0	0	0	0
ENSG00000257658.1	AC004217.2	0	0	0	0	0	0	0	0	0	0	0	0	0	0	0	0
ENSG00000267778.1	AC004221.1	0	0	0	0.07	0	0	0	0	0	0	0	0	0	0	0	0
ENSG00000243423.1	AC004223.1	0	0	0	0	0	0	0	0	0	0	0	0	0	0	0	0
ENSG00000267457.1	AC004223.2	0	0	0	0	0	0	0	0	0	0	0	0	0	0	0	0
ENSG00000273687.1	AC004223.3	0	0	0	1.46	0	0	0	0	0	0	0	0	0	0	0	0
ENSG00000240311.1	AC004224.1	0	0	0	0	0	0	0.14	0	0	0	0	0	0	0	0	0
ENSG00000263212.2	AC004224.2	0	0	0	0	0.89	1.1	0	0	0	0	1.03	0.59	0	0	0	0
ENSG00000234477.1	AC004231.1	0	0	0	0.14	0	0.1	0	0.09	0	0	0	0	0	0.07	0.29	0
ENSG00000265359.1	AC004231.3	0	0	0	0	0	0	0	0	0	0	3.67	0	0	0	0	0
ENSG00000262554.1	AC004232.1	0	28.14	0	3.61	2.87	0	0	0	0	0	0	0	1.67	0	0	0
ENSG00000262899.1	AC004232.2	0	0	0	0	0	0	0	0	0	0	0	0	0.52	0	0	0.03
ENSG00000279031.1	AC004232.3	0	0	0	0.46	0	0	0	0.18	0	1.35	0.29	0.56	0	0	0	0
ENSG00000262362.1	AC004233.1	0	0	0	0	0	0	0	0	0	0	0	0	0	0	0	0
ENSG00000270168.2	AC004233.2	0	0	0	0.04	0	0	0	0	0	0	0	0	0	0	0	0
ENSG00000272079.2	AC004233.3	0	0	0	0.12	0	0	0	0	0.36	0	0.15	0.12	0.09	0	0.08	0.13
ENSG00000274367.1	AC004233.4	0	0	0	0	0	0	0	0	0	0	0	0	0	0	0.5	0
ENSG00000257433.5	AC004241.1	0.32	0.16	1.09	1.05	0.78	1.26	1.12	0.53	0.35	0.19	0.58	0.89	0.51	0.21	1.48	1.22
ENSG00000274902.1	AC004241.2	0	0.34	0	0	0	0	0	0	0	0	0	0	0	0	0	0
ENSG00000276390.1	AC004241.3	1.02	0.49	0.19	0.79	0	0.67	0	0.38	0.63	0.4	0	0.12	0.36	0.32	0.63	0.8
ENSG00000277173.1	AC004241.4	0	0	0	0	0	0	0	0	0	0	0	0	0	0	0	0
ENSG00000280054.1	AC004241.5	0	0.06	0.02	0	0	0	0	0.23	0	0.19	0	0.03	0	0.09	0	0.12
ENSG00000263990.1	AC004253.1	0	0	0	0.89	0	0	0.19	0.43	0.18	0	0	0.13	0.2	0.18	0.35	0.36
ENSG00000265046.1	AC004253.2	0	0	0	0	0	0	0	0	0	0	0	0	0	0	0	0
ENSG00000269635.1	AC004257.1	0	0	0	0	0	0	0	0	0	0	0	0	0	0	0	0
ENSG00000275936.1	AC004263.1	0	0	0	0.48	0	0	0	0	0	0	0	0	0	0	0.1	0
ENSG00000268812.3	AC004264.1	0	0	0	0	0	0	0	0	0	0	0	0.06	0	0	0.08	0
ENSG00000279699.1	AC004264.2	0	0	0	0	0	0	0	0	0	0	0	0	0	0	0	0
ENSG00000260510.1	AC004381.1	0	0	0	0	0	0	0	0	0	0	0	0	0	0	0	0.77
ENSG00000283399.1	AC004381.2	0	0	0	0	0	0	0.08	0	0.04	0	0.14	0.09	0.21	0	0	0
ENSG00000285303.1	AC004381.3	0	0.06	0.13	0.08	0.05	0	0.12	0.23	0.31	0.1	0.52	0.36	0.36	0.36	0	0
ENSG00000226107.1	AC004383.1	0	0	0	0	0	0	0	0	0	0	0	0	0	0	0	0
ENSG00000213269.2	AC004386.1	0	0	0	0	0	0	0	0	0	0	0	0	0	0	0	0
ENSG00000226515.1	AC004386.2	0	0	0	0	0	0	0	0	0	0	0	0	0	0	0	0
ENSG00000266101.1	AC004408.1	0	0	0	0	0	0	0	0	0	0	0	0	0	0	0	0
ENSG00000280177.1	AC004408.2	0	0	0	0	0	0	0	0	0	0	0	0	0	0	0	0
ENSG00000236414.1	AC004415.1	0	0	0	0	0	0	0	0	0	0	0	0	0	0	0	0
ENSG00000231477.2	AC004448.1	0	0	0	0	0	0	0	0	0	0	0	0	0	0	0	0
ENSG00000235979.8	AC004448.2	0	0	0	0	0	0	0	0	0	0	0	0	0	0	0	0
ENSG00000265126.1	AC004448.3	0	0	0	0	0	0	0	0	0	0	0	0	0	0	0	0
ENSG00000261204.1	AC004449.1	0	0	0	0	0	0	0	0	0	0.29	0	0	0	0.46	0	0
ENSG00000146677.7	AC004453.1	0	0	0	0	0	0	0	0	0	0	0.26	0	0	1.86	0	0.53
ENSG00000279853.1	AC004453.2	0	0	0	0	0	0	0	0	0	0	0	0	0.07	0	0	0
ENSG00000237347.2	AC004461.1	0	0	0	0	0	0	0	0	0	0	0	0	0	0	0	0
ENSG00000281530.1	AC004461.2	0	0	0	0	0	0	0	0.09	0	0	0	0	0	0	0	0
ENSG00000268069.2	AC004466.1	0.72	0.33	0	0	0	0	0.07	0.19	0	0	0.2	0.13	0.55	0	0.05	0.02
ENSG00000274737.1	AC004466.2	0.17	1.22	2.82	0.47	0	1.12	0.69	0.38	1.27	0	0.15	0	1.28	0.16	0.31	0.16
ENSG00000276691.1	AC004466.3	0	0	0	0	0	0	0	0	0	0	0	0	0	0	0	0
ENSG00000275194.1	AC004467.1	0	0	0	0	0	0	0	0	0	0	0	0	0	0	0	0
ENSG00000237019.1	AC004470.1	0	0	0	0	0	0.89	0	0	0	0	0	0.67	1.12	0	0	0
ENSG00000223461.1	AC004471.1	0	0	0	0.38	0.33	0.18	0	0.6	0.5	0.8	1.09	0.09	0	0.25	1.63	0.91
ENSG00000272682.1	AC004471.2	0	0.08	0	0.03	0	0	0	0	0	0	0	0	0	0.07	0	0
ENSG00000263412.1	AC004477.1	0.46	0.05	0.86	0.13	0.15	0.62	0.06	0	0.09	0.71	0.4	0.31	0.19	0.78	0.72	0.74
ENSG00000266341.1	AC004477.2	0	0	0	0	0	0	0	0	0	0	0	0	0	0	0	0
ENSG00000278765.1	AC004477.3	0.39	1.69	2.28	1.71	1.44	1.22	0.52	0.88	0.62	2.49	0.71	0.82	0.85	0.62	0.86	2.41
ENSG00000228944.1	AC004485.1	0	0	0	0	0	0.21	0	0	0	0	0	0	0	0	0	0
ENSG00000257905.1	AC004486.1	0	0	0	0	0	0	0	0	0	0	0	0	0	0	0	0
ENSG00000267122.1	AC004490.1	0	0	0	0.02	0	0	0	0	0	0	0	0	0	0	0	0
ENSG00000279996.1	AC004491.1	0	0	0	0.1	0	0	0	0	0	0	0.21	0	0	0.08	0	0.03
ENSG00000272072.1	AC004492.1	0	0	0	0.17	0	0	0	0	0	0	0	0	0	0	0	0
ENSG00000262312.2	AC004494.1	0.02	0	0.07	0.02	0	0	0	0	0	0	0.05	0.05	0.09	0.05	0	0.17
ENSG00000278942.1	AC004494.2	0	0.34	0	0	0	0.2	0	0	0	0	0	0	0	0	0	0
ENSG00000235713.1	AC004522.1	0	0	0	0	0	0	0	0	0	0	0	0	0	0	0	0
ENSG00000237640.1	AC004522.2	0.31	0.44	0.11	0.48	0	0.82	0.3	0.34	0.1	0	0	0.36	0	0	0	0
ENSG00000266990.1	AC004528.1	0.11	0.63	0	0.44	0.12	0.13	0	0.23	0.32	0	0.27	0.55	0	0.36	0.32	0.25
ENSG00000274177.1	AC004528.2	0	0	0	0	0	0	0	0	0	0	0	0	0	0	0	0
ENSG00000214870.8	AC004540.1	8.3	9.46	7.91	8.11	8.79	8.56	8.69	6.33	16.45	6.43	12.83	13.96	9.62	9.5	1.07	0.13
ENSG00000225792.1	AC004540.2	42.32	27.85	28.57	26.98	27.63	24.11	34.66	39.81	47.11	60.74	53.64	35.23	43.55	38.72	0.23	0.24
ENSG00000269972.1	AC004542.1	0	0	0	0	0	0	0	0	0	0	0	0	0	0	0	0
ENSG00000269987.1	AC004542.2	0	0	0	0	0	0	0	0	0	0	0	0	0	0	0	0
ENSG00000237921.2	AC004543.1	0	0	0	0	0	0	0	0	0	0	0	0	0	0	0	0
ENSG00000257452.1	AC004551.1	0	0	0	0	0	0	0	0	0	0	0	0	0	0	0	0
ENSG00000225071.1	AC004552.1	0	0	0	0	0	0	0	0	0	0	0.44	0.3	0	0	0	0.41
ENSG00000223418.1	AC004554.1	0.17	0	0.11	0	0	0	0	0	0	0	0	0	0	0	0	0
ENSG00000282840.1	AC004554.2	0	0.11	0	0	0	0	0	0	0	0.03	0	0	0	0	0	0
ENSG00000262298.1	AC004584.1	0	0	0	0.14	0	0	0	0	0	0	0	0	0	0	0	0
ENSG00000262623.1	AC004584.2	0	0	0	0	0	0	0	0	0	0	0	0	0	0	0	0
ENSG00000263120.1	AC004584.3	0	0	0.1	0	0	0	0	0	0	0	0	0	0	0	0	0
ENSG00000266088.5	AC004585.1	0	0	0.09	0	0	0	0	0	0	0	0	0	0	0	0	0
ENSG00000279775.1	AC004585.2	0	0	0	0	0	0	0	0	0	0	0	0	0	0	0	0
ENSG00000251239.1	AC004590.1	0	0	0	0	0	0	0	0	0	0	0	0	0	0	0	0
ENSG00000235669.1	AC004593.1	0	0	0	0	0	0	0.23	0	0	0	0	0	0	0	0	0
ENSG00000285081.1	AC004593.2	0	0	0	0	0	0	0	0	0	0	0	0	0	0	0	0
ENSG00000285162.1	AC004593.3	0	0	0	0.05	0.04	0	0.03	0	0	0	0	0	0	0	0.03	0.13
ENSG00000240499.7	AC004594.1	0	0	0	0	0	0	0	0	0	0	0	0	0	0	0	0
ENSG00000267394.1	AC004596.1	0	0	0	0	0	0	0	0	0	0	0	0	0	0	0	0
ENSG00000268673.3	AC004597.1	0	0	0	0	0	0	0	0	0	0	0	0	0	0	0	0
ENSG00000279488.1	AC004623.1	0	0	0	0	0	0	0.11	0.12	0.11	0	0.12	0	0	0	0.04	0.12
ENSG00000267304.1	AC004637.1	0	0	0	0	0	0	0	0	0	0	0	0	0	0	0	0
ENSG00000260822.1	AC004656.1	3.58	4.43	3.57	4.74	1.76	4.4	2.66	3.93	1.97	1.55	1.39	1.43	2.4	0.96	1.13	1.13
ENSG00000249028.2	AC004672.1	0	0	0	0	0	0	0	0	0	0	0	0.05	0.07	0.02	0	0
ENSG00000267285.1	AC004672.2	0	0	0	0	0	0	0	0	0	0	0	0	0	0	0	0
ENSG00000235592.1	AC004674.1	0	0	0	0	0	0	0	0	0	0	0	0	0	0	0	0
ENSG00000275468.1	AC004678.1	0	0	0	0	0	0	0	0	0	0	0	0	0	0	0	0
ENSG00000279653.1	AC004678.2	0	0.08	0	0	0	0	0	0	0.05	0	0	0	0	0	0.16	0
ENSG00000265206.5	AC004687.1	0	0	0	0	0	0	0	0	0	0	0	0	0	0	0	0
ENSG00000285897.1	AC004687.2	0.01	0.04	0	0	0.01	0	0	0	0	0	0	0	0.01	0	0.04	0
ENSG00000225583.1	AC004690.1	0	0	0	0	0	0	0	0	0	0	0	0	0	0	0	0
ENSG00000241345.1	AC004690.2	0	0	0	0	0	0	0	0	0	0	0	0	0	0	0	0
ENSG00000229263.1	AC004691.1	0	0	0	0	0	0	0	0	0	0	0	0	0	0	0	0
ENSG00000250424.4	AC004691.2	0	0	0	0	0	0	0.51	0	0	0	0	0	0	0	0	0
ENSG00000213717.3	AC004692.1	0	0	0	0	0	0	0	0	0	0	0	0	0	0	0	0
ENSG00000228680.1	AC004692.2	0	0	0	0	0	0	0	0	0	0	0	0	0	0	0	0
ENSG00000276578.1	AC004696.1	0	0	0	0	0	0	0	0	0	0	0	0	0	0	0	0
ENSG00000279405.1	AC004696.2	0	0	0	0	0	0	0	0	0	0	0	0	0	0	0	0
ENSG00000263494.1	AC004702.1	0	0	0	0	0	0	0	0	0	0	0	0	0	0	0	0
ENSG00000249815.1	AC004704.1	0	0	0	0	0.66	0.18	0	0	0.13	0	0	0.56	0.29	0	0	0
ENSG00000261996.1	AC004706.1	0.14	0.1	0	0.06	0	0.19	0	0	0.2	0	0	0.39	0	0.07	0	0
ENSG00000262990.1	AC004706.2	0	0	0	0	0	0	0	0	0	0	0	0	0	0	0	0
ENSG00000282936.1	AC004706.3	0	0	0	0.01	0	0	0	0	0	0	0	0	0	0	0	0
ENSG00000253102.1	AC004707.1	0	0	0.43	0	0	0.14	0.61	0	0.39	0	0.09	0	0	0.2	0.89	0.2
ENSG00000269881.1	AC004754.1	0.32	0	0.68	0.23	0.38	0.1	0.49	0.24	0.43	0.4	0.07	0.23	0.53	0.4	0.11	0
ENSG00000285704.1	AC004765.1	0	0	0	0	0	0	0	0	0	0	0	0	0	0	0	0
ENSG00000227495.1	AC004771.1	0	0.19	0	0	0.16	0	0	0	0	0	0.48	0.28	0	0	0	0
ENSG00000234203.1	AC004771.2	0	0	0	0	0	0	0	0	0	0	0	0	0	0	0	0
ENSG00000262227.1	AC004771.3	0.3	0.43	2.12	0.42	0	0	0.3	0.33	0.28	0.35	0	0	0.16	0.28	0.14	0.72
ENSG00000262429.1	AC004771.4	0	0	0	0	0	0	0	0	0	0	0	0	0	0	0	0
ENSG00000262678.1	AC004771.5	0	0.44	0	0.5	0	0.34	0.45	0	0.29	0	0.31	0	0	0.1	0	0
ENSG00000272203.1	AC004775.1	0	0	0	0	0	0	0	0	0	0	0	0	0	0	0	0
ENSG00000279370.1	AC004777.1	0	0	0	0	0	0	0	0	0	0	0	0	0	0	0	0
ENSG00000282943.1	AC004784.1	0	0	0	0	0	0	0	0	0	0	0	0	0	0	0	0
ENSG00000277766.1	AC004790.1	0	0	0	0	0	0	0	0	0	0	0	0	0	0	0	0
ENSG00000280412.1	AC004790.2	0	0	0	0	0	0	0	0	0	0	0	0	0	0	0	0
ENSG00000274777.1	AC004792.1	0	0	0	0	0	0	0	0	0	0	0	0	0	0	0	0
ENSG00000226138.4	AC004801.1	0	0	0	0	0	0	0	0	0	0	0	0	0	0	0	0
ENSG00000240399.1	AC004801.2	0	0	0.09	0	0.2	0.33	0	0.09	0.08	0.4	0	0.53	0	0.32	0	0
ENSG00000257955.1	AC004801.3	0	0	0	0	0	0	0	0	0	0	0	0	0	0	0	0
ENSG00000257985.1	AC004801.4	0	0	0	0	0	0	0	0	0	0	0	0	0	0	0	0
ENSG00000258203.5	AC004801.5	0	0	0	0	0	0	0	0	0	0	0	0	0	0	0	0
ENSG00000276814.1	AC004801.6	0.12	0.17	0.12	0.45	0.29	0.16	0	0.52	0.23	0.14	0	0.34	0	0.17	0.06	0
ENSG00000279840.1	AC004801.7	0	0	0	0	0	0	0	0	0	0	0	0	0	0	0	0
ENSG00000250132.6	AC004803.1	0.94	0.23	0.15	1.44	0.21	0.49	0.38	0.83	0.32	0.02	0.17	0.03	0.08	0.15	1.2	1.94
ENSG00000266076.1	AC004805.1	0	0	0.12	0	0	0	0	0	0	0	0	0	1.34	0.31	0	0.13
ENSG00000270870.1	AC004805.2	0	0	0	0	0	0	0	0	0	0	0	0	0	0	0	0.18
ENSG00000271587.1	AC004805.3	0	0	0	0	0	0	0	0	0	0	0	0	0	0	0	0
ENSG00000280958.1	AC004808.1	0	0	0	0	0	0	0	0	0	0	0	0	0	0	0	0
ENSG00000281008.1	AC004808.2	0	0	0	0	0	0	0	0	0	0	0	0	0	0	0	0
ENSG00000255575.1	AC004812.1	0	0	0	0	0	0	0	0	0	0	0	0	0	0	0	0
ENSG00000277283.1	AC004812.2	2.35	2.47	2.03	2.47	1.59	1.12	1.48	1.87	2.19	1.24	2.41	0.91	0.79	0.97	2.27	3.77
ENSG00000259153.1	AC004816.1	0.79	0	0.91	0.33	0.96	0.95	0.7	0.26	0	0	0.63	0.93	0.79	0	1.84	2.27
ENSG00000275630.1	AC004816.2	0	5.67	1.19	7.74	0	0	0	0	0	0	0	0	1.03	0	0.84	3.07
ENSG00000258517.1	AC004817.1	0	0	0	0	0	0	0	0	0	0	0	0	0	0	0	0
ENSG00000259907.1	AC004817.2	0	0	0	0	0	0	0	0	0	0	0	0	0	0	0	0
ENSG00000269927.1	AC004817.3	0	0	0	0	0	0	0	0	0	0	0.02	0	0	0	0.15	0.07
ENSG00000269945.1	AC004817.4	0.02	0.04	0.08	0.12	0.03	0.12	0.02	0.08	0.03	0.02	0.05	0.09	0.07	0.15	0.05	0.11
ENSG00000227751.1	AC004824.1	0	0	0	0	0	0	0	0	0	0	0	4.53	1.22	0	0	0
ENSG00000258431.1	AC004825.1	0	0	0	0	0	0	0	0	0	0	0	0	0	0	0	0
ENSG00000274818.1	AC004825.2	0.68	1.29	1	3.31	1.37	0.29	0.92	2.01	1.03	2.08	0.4	0.9	1.2	1.86	0.21	2.07
ENSG00000258871.1	AC004828.1	0	0	0	0.2	0	0	0	0	0	0	0	0	0	0	0	0
ENSG00000228204.2	AC004830.1	0	0	0	0	0	0	0	0	0	0	0	0	0	0	0	0
ENSG00000181123.8	AC004832.1	0	0	0	0	0	0	0	0	0	0	0	0	0	0	0	0
ENSG00000230137.1	AC004832.2	0	0	0	0	0	0	0	0	0	0	0	0	0	0	0	0
ENSG00000249590.7	AC004832.3	0	0	0.41	0	0	0	0	0	0	0.01	0.33	0.48	0	0	0.35	0.93
ENSG00000272689.1	AC004832.4	0.56	0.79	0	1.96	0	2.02	0	0	0	0	0	0	0	0	1.92	0
ENSG00000273350.1	AC004832.5	0.62	0.44	0.7	0	0	0	0	0	0.28	0	0	0.2	0	0	0	0
ENSG00000273428.3	AC004832.6	0	0.55	0	0	0	0	0	0	0	0	0	0.48	0	0	0	0
ENSG00000284523.1	AC004834.1	0	0	0	0	0.03	0	0	0	0	0	0.05	0	0	0	0	0
ENSG00000230392.1	AC004835.1	0.03	0.02	0.07	0.01	0.02	0.02	0.02	0.05	0.06	0.1	0.11	0.03	0	0.08	0.06	0.07
ENSG00000270625.1	AC004835.2	0	0	0	0	0	0	0	0	0	0	0	0	0	0	0	0
ENSG00000280439.1	AC004836.1	0	0	0	0	0	0	0	0.38	0	0.27	0	0	0	0.22	0	0
ENSG00000106540.4	AC004837.1	0	0.52	0.06	0.24	0.17	0.75	0.6	0.64	0	1.45	1.07	0	0.74	0.26	0.14	0
ENSG00000228554.1	AC004837.2	0	0	0.29	0.26	0.11	0.37	0.18	0.2	0.43	0	0.08	0	0.39	0.17	0	0
ENSG00000231951.1	AC004837.3	0	0	0	0	0.35	0	0	0.11	0	0	0	0	0	0	0	0
ENSG00000272854.1	AC004839.1	0.73	0	1.8	0.17	0.89	0	0	0	0.34	0	0.97	0.61	0	0.34	0	0
ENSG00000230914.3	AC004840.1	0	0	0	0.58	0	0	0	0	0	0	0	0	0	0	0	0
ENSG00000271163.1	AC004840.2	0	0	0	0	0	0	0	0	0	0	0	0	0	0	0	0
ENSG00000258376.2	AC004846.1	0.31	0.13	0.12	0.03	0.09	0	0	0	0.12	0.06	0.12	0	0	0	0.26	0.02
ENSG00000258944.1	AC004846.2	1.82	0.36	0.2	0	1.01	0.33	0	0.09	0.16	0.1	0.07	0.53	0.27	0.56	0.39	0.25
ENSG00000260997.1	AC004847.1	0	0	0	0	0	0	0	0	0	0	0	0	0	0	0	0
ENSG00000271526.1	AC004852.1	0	0	0	0	0	0	0	0	0	0	0	0	0	0	0	0
ENSG00000278254.4	AC004852.2	0	0	0	0	0	0	0	0	0	0	0	0	0	0	0	0
ENSG00000278446.1	AC004852.3	0	0	0	0	0	0	0	0	0	0	0	0	0	0	0	0
ENSG00000270729.1	AC004853.1	0	0	0	0	0	0	0	0	0	0	0	0	0	0	0	0
ENSG00000230160.1	AC004854.1	0	0	0	0	0	0	0	0	0	0	0	0	0	0	0	0
ENSG00000272768.1	AC004854.2	0.17	0.51	0.37	0.24	0.36	0.13	0.31	0	0.36	0.34	0.87	0.45	1.35	0.87	0.67	0.13
ENSG00000259109.1	AC004858.1	0	0	0	0	0	0	0	0	0	0	0	0	0	0	0	0
ENSG00000232667.10	AC004862.1	0	0	0	0	0	0	0	0	0	0	0	0	0	0	0	0
ENSG00000236274.1	AC004865.1	0	0	0	0	0	0	0	0	0	0	0.1	0	0	0	0	0
ENSG00000239636.1	AC004865.2	0.14	0	0	0.07	0.26	0	0	0	0.27	0.09	0	0	0.16	0	0	0
ENSG00000223514.1	AC004866.1	0	0	0	0	0	0	0	0	0	0	0	0	0	0	0	0
ENSG00000224134.1	AC004866.2	0	0	0	0	0	0	0	0	0	0	0	0	0	0	0	0
ENSG00000230680.2	AC004869.1	0	0	0	0	0	0	0	0	0	0	0	0	0	0	0	0
ENSG00000240355.1	AC004869.2	0	0	0	0	0	0	0	0	0	0	0	0	0	0	0	0
ENSG00000214754.3	AC004870.1	0	0	0	0	0	0	0	0	0	0	0	0	0	0	0	0
ENSG00000223829.5	AC004870.2	0	0	0	0	0	0	0	0	0	0	0	0	0	0	0	0
ENSG00000229192.6	AC004870.3	0	0	0	0	0	0	0	0	0	0	0	0	0	0	0	0
ENSG00000232072.1	AC004870.4	0	0	0	0	0	0	0	0	0	0	0	0	0	0	0	0
ENSG00000233417.1	AC004872.1	0	0	0	0	0	0	0	0	0	0	0	0	0	0	0	0
ENSG00000227743.2	AC004875.1	0	0	0	0	0	0	0	0	0	0	0	0	0	0	0	0
ENSG00000273419.1	AC004877.1	0	0	0	0.08	0	0	0	0	0	0	0	0	0	0.05	0	0.01
ENSG00000280149.1	AC004877.2	1.28	0.18	0	0.48	0	0	0.38	0	1.08	0.3	0.57	0.8	0.41	0	0.36	0.37
ENSG00000232396.2	AC004882.1	0	0	0	0	0	0	0	0	0	0	0	0	0	0	0	0
ENSG00000239446.1	AC004882.2	0	0	0	0	0	0	0	0	0	0	0	0	0	0	0	0
ENSG00000213361.2	AC004884.1	0	0	0	0	0	0	0	0	0	0	0	0	0	0	0	0
ENSG00000242154.1	AC004884.2	0.15	0.44	1	0	0.37	0.2	0.3	0	0.57	0.54	0.41	0.31	0	0	0	0
ENSG00000231295.1	AC004888.1	0	0	0	0	0	0	0	0	0	0	0	0	0	0	0	0
ENSG00000244198.6	AC004889.1	5.36	3.72	3.82	4.25	7.39	7.57	4.08	8.62	2.78	4.07	2.41	5.22	3.31	2.17	1.12	2.55
ENSG00000239719.1	AC004890.1	0	0	0	0	0	0	0	0	0	0	0	0	0	0	0	0
ENSG00000244560.7	AC004890.2	0.26	0	0.24	0.47	0.23	0.38	0.88	0.24	0	0.22	0.68	0.31	0.11	2.21	0.23	0.15
ENSG00000271664.1	AC004890.3	0	0	0	0	0	0	0	0	0	0	0	0	0	0	0	0
ENSG00000238109.1	AC004893.1	0	0	0	0	0	0	0	0	0	0	0.03	0	0	0	0	0
ENSG00000284840.1	AC004893.2	0	0	0	0	0	0	0	0	0	0	0	0	0	0	0	0
ENSG00000231704.5	AC004895.1	0	0	0	0	0	0	0	0	0	0	0	0	0	0	0	0
ENSG00000236018.2	AC004898.1	0	0	0	0	0	0	0	0	0	0	0	0	0.09	0	0	0
ENSG00000225705.2	AC004899.1	0	0	0	0	0	0	0	0	0	0	0	0	0	0.03	0	0
ENSG00000279578.1	AC004899.2	0	0	0	0	0	0	0	0	0	0	0	0	0	0	0	0
ENSG00000285518.1	AC004900.1	0	0	0	0	0	0	0	0	0	0	0	0	0	0	0.07	0
ENSG00000237286.1	AC004906.1	0	0	0	0	0	0	0	0	0	0	0	0	0	0	0	0
ENSG00000272240.1	AC004908.1	0	0	0.17	0	0.19	0	0	1.04	0	0	0.14	0	0	0.87	0	0.15
ENSG00000272812.1	AC004908.2	0.37	0.4	0	1.16	0.17	0	0.28	0.15	0.13	0	0.37	0.1	0	0.39	1.03	1.2
ENSG00000273402.1	AC004908.3	0	0	0	0	0	0	0	0	0	0	0	0.25	0	0.22	0	0
ENSG00000228429.1	AC004910.1	0	0	0	0	0	0	0	0	0	0.2	0	0	0	0.16	0.11	0
ENSG00000226592.1	AC004911.1	0	0	0	0	0	0	0	0	0	0	0	0	0	0	0	0
ENSG00000243797.6	AC004917.1	0	0	0	0	0	0	0	0	0.14	0	0	0	0	0	0	0
ENSG00000244701.1	AC004918.1	5.71	5.82	5.85	3.02	1.28	3.57	2.95	2.13	6.21	7.55	4.72	8.85	5.37	14.76	0.6	1.18
ENSG00000270157.1	AC004918.3	8.29	3.29	4.06	3.91	3.98	2.16	2.48	3.75	2.31	3.4	3.29	5.45	5.93	8.28	0.54	2.2
ENSG00000236046.1	AC004920.1	0	0	0	0	0	0	0	0	0	0	0	0	0	0	0	0
ENSG00000273341.1	AC004921.1	0	0	0	0	0	0	0	0	0	0.11	0	0	0	0	0	0
ENSG00000284292.1	AC004922.1	6	6.34	8.58	8.41	8.51	14.72	14.73	6.37	11.75	10.94	13.61	9.59	9.97	10.24	10.98	6.47
ENSG00000254610.3	AC004923.1	0	0	0	0	0	0	0	0	0	0	0	0	0	0	0	0
ENSG00000254850.2	AC004923.2	0	0	0	0	0	0	0	0	0	0	0	0	0	0	0	0
ENSG00000255230.1	AC004923.3	0	0	0	0	0	0	0	0	0	0	0	0	0	0	0	0
ENSG00000255306.1	AC004923.4	0	0	0	0	0	0	0	0	0	0	0.16	0	0	0	0	0
ENSG00000279419.1	AC004925.1	0.66	0.34	0.32	0.13	0.25	0.19	0.16	0.64	0.71	1.28	0.51	0.2	0.41	0.35	0.66	0.39
ENSG00000241324.1	AC004930.1	0	0	0	0	0	0	0	0	0	0	0	0	0	0	0	0
ENSG00000235431.1	AC004936.1	0	0	0	0	0	0	0	0	0	0	0	0	0	0	0	0
ENSG00000225443.1	AC004938.1	0	0	0	0	0	0	0	0	0	0	0	0	0	0	0	0
ENSG00000228151.1	AC004941.1	0	0	0	0	0	0	0	0	0	0	0	0	0	0	0	0
ENSG00000231397.1	AC004941.2	0	0	0	0	0	0	0	0	0	0	0	0	0	0	0	0
ENSG00000259209.3	AC004943.1	0.59	0.56	0	0.05	0.25	0.35	0	0.43	0.18	0	0	0	0.06	0.1	0.05	0.96
ENSG00000259768.5	AC004943.2	0.46	0.5	1.08	0.78	0.93	0.13	0.79	1.13	0.97	0.39	0.5	0.21	0.63	0.19	0.5	0.95
ENSG00000279206.1	AC004943.3	0	0.18	0	0	0	0	0	0	0	0	0	0	0	0	0	0
ENSG00000253510.1	AC004944.1	0	0	0	0	0	0	0	0	0	0	0	0	0	0	0	0
ENSG00000222024.2	AC004945.1	0	0	0	0	0	0	0	0	0	0	0	0.3	0	0.17	0	0
ENSG00000233969.1	AC004946.1	0	0	0	0	0	0	0	0	0	0	0	0	0	0	0	0
ENSG00000233760.1	AC004947.1	0	0	0	0	0	0	0	0	0	0	0	0	0	0	0	0
ENSG00000280255.1	AC004947.2	0	0.05	0.18	0.2	0	0.21	0	0.06	0	0	0.11	0.06	0.47	0.02	0	0
ENSG00000272745.1	AC004948.1	0	0	0	0	0	0	0	0	0	0	0	0	0	0	0	0
ENSG00000283117.1	AC004949.1	0	0	0	0	0	0	0	0	0.01	0	0	0	0.03	0	0.03	0
ENSG00000228434.1	AC004951.1	0.68	1.5	1.23	1.41	0.8	0.5	1.12	1.13	1.35	0.77	1.54	1.74	1.16	1.26	0.72	1.82
ENSG00000239556.4	AC004951.2	0.3	0.03	0.54	0.36	0.86	0.17	0.87	0	0.39	0.3	0.36	0	0	0.15	0.59	0
ENSG00000241057.2	AC004951.3	0	0	0	0	0	0	0	0	0	0	0	0	0	0	0	0
ENSG00000273432.1	AC004951.4	0.12	0.23	0.22	0	0.21	0.02	0.31	0.35	0.06	0.26	0.13	0.15	0.3	0.33	0.04	0.12
ENSG00000233683.1	AC004965.1	0	0	0	0	0	0	0	0	0	0	0	0	0	0	0	0
ENSG00000243554.1	AC004967.1	0	0	0	0	0	0	0	0	0	0	0.21	0	0	0	0	0
ENSG00000285725.1	AC004967.2	0.67	0.73	0.81	0.51	0.78	0.25	0.58	1.07	0.44	0.29	0.08	0.13	0.14	0.23	2.38	2.01
ENSG00000238358.2	AC004969.1	0.41	0.2	0	0.51	0.17	0.18	0	0.61	0.26	0.16	0.49	0.75	0.59	0.51	0	0
ENSG00000279326.1	AC004972.1	0	0	0	0	0	0	0	0	0	0	0	0	0	0	0	0
ENSG00000226661.1	AC004973.1	0	0	0	0	0	0	0	0	0	0	0	0	0	0	0	0
ENSG00000285612.1	AC004974.1	0	0	0	0	0	0	0	0	0	0	0	0	0	0	0	0
ENSG00000224629.1	AC004975.1	0	0	0	0	0	0	0	0	0	0	0	0	0	0	0	0
ENSG00000229660.1	AC004975.2	0	0	0	0	0	0	0	0	0	0	0	0	0	0	0	0
ENSG00000205485.13	AC004980.1	1.33	2.17	3.61	3.31	1.6	1.57	1.07	1.58	2.97	1.9	1.71	1.15	1.66	2.42	1.5	0.87
ENSG00000214243.3	AC004980.2	0	2.11	0.41	0.17	0.45	0	0	0.21	0	0.22	0.16	0	0.39	0.51	0	0.17
ENSG00000230305.2	AC004980.3	1.15	0	1.59	0.73	0.98	0	0.88	2.26	1.73	2.67	1.38	2.14	1.33	0	0.72	0
ENSG00000250778.1	AC004980.4	0	0	0	0	0	0	0	0	0	0	0	0	0	0	0	0
ENSG00000272732.1	AC004982.1	0.03	0.17	0.03	0.11	0	0	0	0	0	0	0	0.07	0	0.06	0	0.03
ENSG00000272894.5	AC004982.2	0.03	0.14	2.39	0.06	0	0	0.09	0.11	0.03	0.04	0.09	0.07	0.03	0.5	0.03	0
ENSG00000227573.2	AC004986.1	0	0	0	0	0	0	0	0	0	0	0	0	0	0	0	0
ENSG00000231198.1	AC004987.1	0	0	0	0	0	0	0	0	0	0	0	0	0	0	0	0
ENSG00000233225.3	AC004987.2	0	0	0	0	0.06	0.07	0.05	0	0	0	0	0	0	0	0	0
ENSG00000237251.2	AC004987.3	0	0	0	0.16	0	0	0	0	0	0	0	0	0	0	0	0
ENSG00000270797.1	AC004987.4	0	0	0	0	0	0	0	0	0	0	0	0	0	0	0	0
ENSG00000203446.2	AC004988.1	0	0	0.09	0.11	0.03	0	0	0	0	0	0.03	0.01	0	0	0	0
ENSG00000232756.1	AC004990.1	0	0	0	0	0	0	0	0	0	0	0	0	0	0	0	0
ENSG00000226522.1	AC004994.1	0	0	0	0	0	0	0	0	0	0	0	0	0	0	0	0
ENSG00000248751.6	AC004997.1	0.18	1.9	0.66	1.33	0.98	0.89	0.69	0.16	1.55	0.98	2.14	1.99	1.45	1.81	0.54	0.39
ENSG00000228532.4	AC005000.1	0	0	0	0.66	0	0	0	0	0	0	0	0	0	0	0	0
ENSG00000270431.1	AC005000.2	0	0	0	0	0	0	0	0	0	0	0	0	0	0	0	0
ENSG00000224314.1	AC005002.1	0	0	0	0	0	0	0	0	0	0	0	0	0	0	0	0
ENSG00000238066.1	AC005002.2	0	0	0	0	0	0	0	0	0	0	0	0	0	0	0	0
ENSG00000214125.2	AC005005.1	0	0	0	0	0	0	0	0	0	0	0	0	0	0	0	0
ENSG00000235573.2	AC005005.2	0	0	0	0	0	0	0	0	0	0	0	0	0	0.32	0	0
ENSG00000273387.1	AC005005.3	0.26	0.05	0.12	0.59	0.45	0.2	0.14	0.04	0.42	0.04	0.47	0.03	0.44	0.25	0.14	0.34
ENSG00000278920.1	AC005005.4	0	0	0	0.01	0	0	0	0	0.01	0	0	0	0	0.01	0.01	0.01
ENSG00000223831.1	AC005006.1	0	0	0	0	0	0	0	0	0	0	0	0	0	0	0	0
ENSG00000226671.1	AC005008.1	0	0	0	0	0	0	0	0	0	0	0	0	0	0	0	0
ENSG00000237896.6	AC005008.2	0	0	0	0	0	0	0	0	0	0	0	0	0	0	0	0
ENSG00000231255.1	AC005009.1	0	0	0	0	0	0	0	0	0	0	0	0	0	0	0	0
ENSG00000233073.1	AC005009.2	0	0	0.87	0	0	0.14	0	0.22	0.67	0.09	0.78	0.57	0.32	0	0	0
ENSG00000235581.1	AC005011.1	0	0	0	0	0	0	0	0	0	0	0	0	0	0	0	0
ENSG00000228421.2	AC005013.1	0	0.38	0	0	0	0	0	0	0	0	0	0	0	0	0	0
ENSG00000224280.1	AC005014.1	0	0	0	0	0	0.02	0.04	0	0	0.08	0	0	0	0.06	0	0
ENSG00000272361.2	AC005014.2	0	0.37	0.14	0.24	0	0.34	0.13	0.28	0.36	0.15	0.46	0	0.27	0	0	0.25
ENSG00000272537.1	AC005014.3	0	0	0	0	0	0	0	0	0	0	0	0	0	0	0	0
ENSG00000213875.3	AC005019.1	0	0	0	0	0	0	0	0	0	0.29	0	0	0	0	0	0
ENSG00000224330.1	AC005019.2	0	0	0	0	0	0	0	0	0	0	0	0	0	0	0	0
ENSG00000224448.1	AC005020.1	0	0	0	0	0	0	0.33	0	0	0	0	0	0	0	0	0
ENSG00000272647.3	AC005020.2	0	0	0	0	0	0	0	0	0	0	0	0	0	0	0	0.21
ENSG00000273138.1	AC005021.1	0	0	0	0	0	0.54	0	0	0	0	0	0	0	0	0	0
ENSG00000233872.1	AC005033.1	0	0	0	0	0	0	0	0	0	0	0	0	0	0	0	0
ENSG00000230477.1	AC005034.1	0	0	0	0	0	0	0	0	0	0	0	0	0	0	0	0
ENSG00000270462.1	AC005034.2	0	0	0	0.26	0	0	0	0	0	0	0.99	0	0	0.26	0	0
ENSG00000270696.1	AC005034.3	4.98	3.6	6.08	7.77	3.87	5.36	6.67	9.48	4.72	5.39	5.31	3.24	5.9	7.7	3.32	5.38
ENSG00000270996.1	AC005034.4	0.07	0	0	0	0	0	0.39	0	0.44	0	0	0.19	0	0.19	0.06	0.13
ENSG00000271452.1	AC005034.5	0	0	0	0.2	0	0	0.43	0	0.39	0.74	0	0	0	0	0	0
ENSG00000183308.6	AC005037.1	2.17	0.28	1.94	1.19	0.47	2.28	0.98	1.52	0	1.56	0.69	0.61	0	0	0.14	1.39
ENSG00000226905.1	AC005040.1	0	0	0	0	0	0	0	0	0	0	0	0	0	0	0	0
ENSG00000159239.13	AC005041.1	0	0	0	0.02	0	0	0.03	0	0.02	0	0.02	0	0	0.02	0.01	0.01
ENSG00000234521.2	AC005041.2	0	0	0	0	0	0	0	0	0	0	0	0	0	0	0	0
ENSG00000272183.1	AC005041.3	0.89	0.32	0.6	0.41	0.14	0.15	0.55	0.49	0.84	0.92	0.5	0	0	0.21	0	0
ENSG00000227331.1	AC005042.1	0	0	0	0.3	0	0	0	0	0	0.1	0	0	0	0.15	0	0
ENSG00000228586.1	AC005042.2	0	0	0	0	0	0	0	0	0	0	0	0	0	0	0	0
ENSG00000231675.1	AC005042.3	0	0	0	0	0	0	0	0	0	0	0	0	0	0	0	0
ENSG00000273055.1	AC005046.1	0	0	0.38	0.33	0.14	0.16	0.12	0.13	0.22	0.56	0.42	3.75	0.51	1.18	0.77	0.46
ENSG00000267052.2	AC005050.1	0.09	0.26	0.28	0.23	0.22	0.28	0.88	0.26	0.09	0.18	0.38	1.47	1.16	0.66	0.03	0.61
ENSG00000279601.1	AC005052.1	0	0	0	0	0	0	0	0	0	0	0	0	0	0	0	0
ENSG00000243004.5	AC005062.1	9.08	14.46	10.54	16.49	15.93	20.92	11.07	17.3	17.78	18.8	8.92	29.48	18.65	16.44	15.97	21.1
ENSG00000234715.1	AC005064.1	0	0	0	0	0	0.05	0	0	0	0	0	0	0.02	0	0	0
ENSG00000273978.1	AC005066.1	0	0	0	0	0	0	0	0	0	0	0	0	0.06	0	0	0
ENSG00000270764.1	AC005070.1	0	0	0	0	0	0	0	0	0	0	0	0	0	0	0	0
ENSG00000271482.1	AC005070.2	0	0	0	0	0	0	0	0	0	0	0	0	0	0	0	0
ENSG00000272918.1	AC005070.3	0.05	0	0.31	0.08	0.02	0.14	0.12	0.35	0.05	0	0.1	0.08	0.06	0.03	0.07	0.09
ENSG00000272219.1	AC005072.1	0	0.04	0.09	0.16	0	0.11	0.13	0.18	0	0.24	0	0.06	0	0.27	0	0.2
ENSG00000224046.1	AC005076.1	2.5	0.12	0.87	0.08	0	0.56	0.41	1.25	0.32	4.73	0.89	2.13	2.7	0.97	0.55	0.42
ENSG00000213549.3	AC005077.1	0	0	0	0	0	0	0	0	0	0	0	0	0	0.66	0	0
ENSG00000224273.2	AC005077.2	0	0	0	0	0	0	0	0	0	0	0.36	0	0	0	0	0
ENSG00000228829.1	AC005077.3	0	0	0	0	0	0	0	0	0	0	0	0	0	0	0	0
ENSG00000230882.1	AC005077.4	0	0	0	0	0	0	0	0	0	0	0	0	0	0	0	0
ENSG00000226816.3	AC005082.1	0	0	0	0	0	0	0	0	0	0	0	0	0	0	0	0
ENSG00000285926.1	AC005082.2	0	0	0	0	0	0	0	0	0	0	0	0	0	0	0	0
ENSG00000233834.6	AC005083.1	0	0	0.23	0	0	0	0	0	0	0	0	0.07	0	0.4	0	0
ENSG00000271330.1	AC005084.1	0	0	0	0	0	0	0	0	0	0	0	0	0	0	0	0
ENSG00000261535.1	AC005086.1	0	0	0	0.07	0	0	0	0.18	0	0.57	0.43	0.39	0.09	0.08	0	0
ENSG00000279724.1	AC005086.2	0	0	0	0	0	0	0	0	0	0	0	0	0	0	0	0
ENSG00000280004.1	AC005086.3	0	0	0	0	0	0	0	0	0	0	0	0	0	0	0	0
ENSG00000280404.1	AC005086.4	0	0	0	0	0	0	0	0	0	0	0	0	0	0	0	0
ENSG00000278586.1	AC005088.1	0	0	0	0	0	0	0	0	0	0	0	0	0	0	0	0
ENSG00000274080.1	AC005089.1	0	0	0	0	0	0	0	0	0	0	0	0	0	0	0	0.02
ENSG00000231418.1	AC005090.1	0	0	0	0	0	0	0	0	0	0	0	0	0	0	0	0
ENSG00000229893.2	AC005091.1	0	0	0	0	0	0	0	0	0	0	0	0.03	0	0	0	0
ENSG00000229949.1	AC005094.1	0	0	0	0	0	0	0	0	0	0	0	0	0	0	0	0
ENSG00000259294.1	AC005096.1	0	0	0	0	0	0	0	0	0	0	0	0	0	0	0	0
ENSG00000226624.1	AC005099.1	0	0.35	0	0	0	0	0	0	0	0	0.11	0	0	0	0	0
ENSG00000285960.1	AC005100.1	0	0	0	0	0	0	0	0	0	0	0	0	0	0	0	0
ENSG00000219039.2	AC005102.1	0	0	0	0	0	0	0	0	0	0	0	0	0	0.92	0	0
ENSG00000223374.1	AC005104.1	0.24	0	0	0	0	0	0	2.16	0	0	0	0	0	0	0.44	0.22
ENSG00000224232.1	AC005104.2	0	0	0	0	0	0	0	0	0	0	0	0	0	0.1	0	0
ENSG00000225286.1	AC005105.1	0	0	0	0	0	0	0	0	0	0	0	0	0	0	0	0
ENSG00000283517.1	AC005144.1	0	0	0	0	0	0	0	0	0	0	0	0	0	0	0	0
ENSG00000248431.1	AC005150.1	0	0	0	0	0	0	0	0	0	0	0	0	0	0	0	0.11
ENSG00000226874.1	AC005154.1	0	0	0	0	0	0	0	0	0	0	0	0	0	0	0	0
ENSG00000244480.1	AC005154.2	0	0	0.04	0	0	0	0	0.12	0.07	0	0	0.11	0.08	0.22	0.04	0
ENSG00000263683.1	AC005154.3	0	0	0	0	0	0	0	0	0	0	0	0	0	0	0	0
ENSG00000264520.1	AC005154.4	0	0	0	0	0	0	0	0	0.35	0	0	0	0	0	0	0
ENSG00000281039.1	AC005154.5	0	0	0	0	0	0.86	0.3	0	0	0	0	0	0	0	0	0
ENSG00000278819.1	AC005156.1	0	0	0	0	0	0	0	0	0	0	0	0	0	0	0	0
ENSG00000227658.1	AC005160.1	0	0	0	0	0	0	0	0	0	0	0	0	0	0	0	0
ENSG00000229452.1	AC005162.1	0	0	0	0	0	0	0	0	0	0	0	0	0	0	0	0
ENSG00000233517.1	AC005162.2	0	0	0	0	0	0	0	0	0	0	0	0	0	0	0.25	0
ENSG00000272568.5	AC005162.3	0	0	0.19	0.03	0	0	0	0	0.16	0	0	0	0	0.07	0.43	0
ENSG00000223561.6	AC005165.1	0.08	0	0.11	0.05	0.1	0.07	0	0	0	0	0	0	0	0	0	0.18
ENSG00000239622.1	AC005165.2	0	0	0	0	0	0	0	0	0	0	0	0	0	0	0	0
ENSG00000268153.5	AC005176.1	0	0	0	0	0	0	0	0	0	0	0	0	0.03	0	0	0
ENSG00000269519.1	AC005176.2	0	0	0	0	0	0	0	0	0	0	0	0	0	0	0	0
ENSG00000251243.1	AC005178.1	0	0	0	0	0	0	0	0	0	0	0	0	0	0	0	0
ENSG00000267405.1	AC005180.1	0.26	0.19	0.43	0	0	0	0	0	0	0	0	0	0	0	0.25	0.77
ENSG00000267505.1	AC005180.2	0	0	0	0	0	0	0	0	0	0	0	0	0	0	0.13	0
ENSG00000271101.1	AC005181.1	0	0	0	0	0	0	0	0	0	0	0	0	0	0	0	0
ENSG00000271500.1	AC005183.1	0	0	0.18	0	0.09	0.03	0.07	0	0.02	0	0.04	0	0.05	0	0.12	0.15
ENSG00000270794.1	AC005185.1	0	0	0	0	0	0	0	0	0	0	0	0	0	0	0	0
ENSG00000275212.2	AC005186.1	0	0	0	0	0	0	0	0	0	0	0	0	0	0	0	0
ENSG00000229497.1	AC005189.1	0	0	0	0	0	0	0	0	0	0	0	0	0	0	0	0
ENSG00000271421.1	AC005191.1	0	0	0	0	0	0	0	0	0	0	0	0	0	0	0	0
ENSG00000269694.1	AC005197.1	0	0	0	0	0	0	0	0	0	0	0.09	0	0	0	0	0
ENSG00000230258.6	AC005208.1	0	0	0	0	0	0	0	0	0	0	0	0	0	0	0	0
ENSG00000263684.1	AC005209.1	0	0	0	0	0	0	0	0	0	0	0	0	0	0	0	0
ENSG00000236352.1	AC005220.1	0	0.1	0	0	0	0	0	0	0.06	0	0.25	0	0	0	0	0.14
ENSG00000231595.1	AC005224.1	0	0.09	0	0.22	0.4	0.09	0.09	0	0.09	0.04	0.09	0.12	0.36	0.32	0	0.17
ENSG00000262786.1	AC005224.2	0	0	0	0	0.09	0	0	0	0	0	0	0	0	0	0	0
ENSG00000266378.1	AC005224.3	0	0	0	0.02	0	0	0	0	0.06	0.03	0.02	0	0	0.04	0	0
ENSG00000258443.1	AC005225.1	0	0	0	0	0	0	0	0	0	0	0	0.05	0	0	0	0
ENSG00000258603.3	AC005225.2	0	0	0	0	0	0	0	0	0.11	0	0	0	0	0	0	0
ENSG00000258695.2	AC005225.3	0	0	0	0	0	0	0	0	0	0	0	0	0	0	0	0
ENSG00000279026.1	AC005225.4	0	0	0	0	0	0	0	0	0	0.03	0	0	0	0	0.18	0.09
ENSG00000213209.2	AC005229.1	0	0	0	0	0	0	0	0	0	0	0	0.95	0	0	0	0
ENSG00000213210.4	AC005229.2	0	0	0	0	0	0	0	0	0	0	0	0	0	0	0	0
ENSG00000270200.1	AC005229.3	0	0	0	0	0	0	0	0	0	0	0	0	0	0	0	0
ENSG00000273314.1	AC005229.4	4.09	3.28	3.48	3.69	3.06	3.28	2.39	2.94	4.66	4.69	4.09	3.24	3.56	1.81	1.41	1.44
ENSG00000258930.1	AC005230.1	0	0	0	0	0	0	0	0	0	0	0	0	0	0	0.82	0
ENSG00000285412.1	AC005232.1	0	0	0	0	0	0	0	0	0	0	0	0	0	0	0	0
ENSG00000235035.1	AC005234.1	0	0	0	0	0	0	0	0	0	0	0	0	0	0	0	0
ENSG00000225521.1	AC005237.1	0	0	0	0	0	0	0	0	0	0.17	0	0	0	0	0	0
ENSG00000235861.1	AC005237.2	0	0	0	0	0	0	0	0	0	0	0	0	0	0	0	0
ENSG00000263648.1	AC005244.1	0	0	0	0	0	0	0	0	0	0	0	0	0	0	0.45	0
ENSG00000265400.1	AC005244.2	0	0	0	0	0	0	0	0	0	0	0	0	0	0	0	0
ENSG00000271184.1	AC005252.1	0	0	0	0	0	0	0	0	0	0	0	0	0	0	0	0
ENSG00000280125.1	AC005252.2	0	0	0	0	0	0	0	0	0	0	0	0	0	0	0	0
ENSG00000280415.1	AC005252.3	0	0	0	0	0	0	0	0	0	0	0	0	0	0	0	0
ENSG00000268030.1	AC005253.1	0.05	0.62	0.1	0.05	0.09	0.39	0.15	0	0.11	0.27	0.34	0.24	0.03	0.27	0.64	0.48
ENSG00000268983.1	AC005253.2	0	0	0	0	0	0	0	0	0	0	0	0	0	0	0	0
ENSG00000256210.3	AC005255.1	0	0	0	0	0	0	0	0	0	0	0	0	0	0	0	0
ENSG00000267073.1	AC005256.1	0	0	0	0	0	0	0	0	0	0	0	0	0	0	0	0
ENSG00000273734.1	AC005258.1	0	0	0	0	0	0	0	0	0	1.26	0	0.18	0	0.15	0	0
ENSG00000268205.1	AC005261.1	2.09	2.26	3.39	3.76	1.98	2.36	2.57	3.53	1.85	2.07	2.2	2.06	2.7	3.7	1.2	2.78
ENSG00000268678.1	AC005261.2	0	0	0.06	0.1	0	0	0.27	0	0	0	0.15	0.19	0.18	0	0.21	0
ENSG00000268713.1	AC005261.3	7.09	5.84	3.89	5.13	4.35	4.64	4.71	7.41	3.19	4.75	4.72	4.17	3.73	6.44	3.32	5.2
ENSG00000268723.1	AC005261.4	0	0	0	0.39	0	0	0	0	0	0	0	0	0	0	0	0
ENSG00000279541.1	AC005261.5	0.29	0.52	0.31	0.19	0.25	0.2	0.15	0.99	0.13	0.17	0.19	0.24	0.59	1.27	0.41	0.64
ENSG00000266944.1	AC005262.1	0	0	0	0.37	1	0	0.87	0	0	1.84	0	0.26	0	0	0.37	0.36
ENSG00000267139.1	AC005262.2	0	0	0	0	0	0	0	0	0	0	0	0	0	0	0	0
ENSG00000267551.3	AC005264.1	0.2	0	0.02	0.19	0	0	0.02	0	0.1	0.1	0.5	0.28	0.18	0.18	0	0
ENSG00000280168.1	AC005274.1	0	0	0	0	0	0	0	0	0	0	0	0	0	0	0	0
ENSG00000263707.1	AC005277.1	0	0.68	0	0	0	0	0	0	0	0	0	0	0	0	0	0
ENSG00000277621.1	AC005277.2	0	0	0	0	0	0	0	0	0	0	0	0	0	0	0	0
ENSG00000251393.3	AC005280.1	0	0	0	0.14	0	0	0	0	0	0	0	0	0	0	0	0
ENSG00000284930.1	AC005280.2	0.31	0.37	0.28	0.21	0	0	0	0	0	0	0	0	0	0	0.55	0
ENSG00000285006.1	AC005280.3	0.25	0	0	0	0	0	0	0	0	0	0.3	0.11	0	0	0	0
ENSG00000225606.1	AC005281.1	0	0	0	0	0	0	0	0	0	0	0	0	0	0	0	0
ENSG00000266469.1	AC005288.1	1.35	2.85	1.73	2.4	1.39	1.15	2.07	4.64	3.17	3.43	2.12	6.34	4.06	1.37	0.47	1.57
ENSG00000264067.1	AC005291.1	0	0	0	0	0	0	0	0	0	0	0	0	0	0	0	0
ENSG00000273388.1	AC005291.2	0	0	0	0	0	0	0	0	0	0	0	0	0	0	0	0
ENSG00000285555.1	AC005293.1	0	0	0	0.06	0.08	0	0	0	0.06	0	0.12	0	0.07	0	0	0.1
ENSG00000256835.1	AC005294.1	0	0	0	0	4.98	0	1.14	0	0	0	0	0.59	8.64	0	0	0
ENSG00000274923.1	AC005296.1	0	0	0	0	0	0	0	0	0	0	0	0	0	0	0	0
ENSG00000227511.1	AC005297.1	0	0	0	0	0	0	0	0	0	0	0	0	0	0	0	0
ENSG00000232644.1	AC005297.2	0	0	0	0	0	0	0	0	0	0	0	0	0	0	0	0
ENSG00000237171.1	AC005297.3	0	0	0	0	0	0	0	0	0	0	0	0	0	0	0	0
ENSG00000236325.1	AC005300.1	0	0	1.31	0.34	0.46	0	0	0.42	0	0	0	0.24	0.8	0.33	0	0
ENSG00000273244.1	AC005301.1	0	0	0	0	0	0	0	0	0	0	0	0	0	0	0	0
ENSG00000273098.2	AC005303.1	0	0	0	0	0	0	0	0	0	0	0	0	0	0	0	0
ENSG00000233852.1	AC005304.1	0	0	0	0	0.37	0	0	0	0	0	0	0	0	0	0	0
ENSG00000265494.1	AC005304.2	0.05	0.14	0.03	0	0.15	0.06	0.07	0.11	0	0.15	0.09	0.07	0.03	0	0.09	0.05
ENSG00000266744.1	AC005304.3	0	0	0	0.16	0	0	0	0	0	0	0	0	0	0	0	0
ENSG00000267283.1	AC005306.1	0	0	0	0.51	0	0.27	0.64	0.59	0.35	0.51	0.19	2.34	0	0.1	0	0
ENSG00000260725.1	AC005307.1	0	0	0	0	0	0.04	0.03	0	0	0	0	0	0.03	0	0	0
ENSG00000214970.8	AC005323.1	0	0	0	0	0	0	0	0	0	0	0	0	0	0	0	0
ENSG00000272736.5	AC005323.2	0	0	0	0	0	0	0	0	0	0	0	0	0	0	0	0
ENSG00000233002.2	AC005324.1	0	0	0	0	0	0	0	0	0	0	0	0	0	0	0	0
ENSG00000233193.1	AC005324.2	0	0	0	0	0	0	0	0	0	0	0	0	0	0	0	0
ENSG00000251537.4	AC005324.3	0	0	0	0	0.03	0.26	0	0	0.14	0.12	0.04	0.07	0.06	0.05	0	0
ENSG00000255104.8	AC005324.4	0	0	0	0.42	0	0.78	0.61	0	0	0	0	0	0.31	0	0	0
ENSG00000266261.1	AC005324.5	0	0	0	0	0	0	0	0	0	0	0	0	0	0	0	0.19
ENSG00000267227.1	AC005324.6	0	0	0	0	0	0	0	0	0	0	0	0	0	0	0	0
ENSG00000226744.1	AC005326.1	0	0	0	0	0	0	0	0	0	0	0	0	0	0	0	0
ENSG00000248015.6	AC005329.1	0.18	0.05	0.39	0.25	0.04	0.1	0.08	0.18	0.06	0.84	0.32	0.07	0	0.25	0.04	0.02
ENSG00000267755.1	AC005329.2	0	0	0	0	0	0	0	0	0	0	0	0	0	0	0	0
ENSG00000280486.1	AC005329.3	0	0	0	0	0	0	0	0	0	0	0	0	0	0.19	0	0
ENSG00000267372.2	AC005330.1	0.09	0	0	0.12	0	0	0	0	0.08	0	0	0	0	0	0	0
ENSG00000265100.1	AC005332.1	0	0	0	0.04	0	0.11	0.04	0	0	0	0.11	0	0	0.12	0.15	0
ENSG00000267731.1	AC005332.2	0	0	0	0	0	0.02	0	0	0	0	0	0	0	0	0	0
ENSG00000274561.1	AC005332.3	3.07	2.36	3.7	4.11	0.86	3.95	4.34	2.37	1.08	4.62	2.7	4.68	4.26	3.23	0.21	1.3
ENSG00000274712.1	AC005332.4	3.93	3.37	3.83	3.03	3.2	3.64	5.35	6.47	2.49	3.03	2.32	1.99	5.5	5.57	1.06	1.2
ENSG00000277476.1	AC005332.5	0.55	1.31	1.41	0.96	0.36	0.96	0.97	0.76	0.73	1.01	1.54	0.56	1.02	1.06	0.54	0.43
ENSG00000278730.1	AC005332.6	6.45	5.02	4.52	5.54	7.36	7.96	8.63	9.95	8.98	7.98	6.4	12.99	13.66	10.65	1.75	2.78
ENSG00000278740.1	AC005332.7	0	0.34	0	0	0	1.12	0	0	0	0	0	0	0	0.11	0	0
ENSG00000267056.2	AC005336.1	0.13	0	0	0	0	0	0.04	0.14	0	0.05	0.08	0	0.09	0	0	0.09
ENSG00000267218.2	AC005336.2	0	0	0	0	0	0	0	0	0	0	0	0	0	0	0	0
ENSG00000279717.1	AC005336.3	0	0	0	0	0	0	0	0	0	0	0	0	0	0	0.02	0
ENSG00000268565.1	AC005339.1	0	0	0.66	0	0	0	0.69	0	0	0	0	86.75	0	0	0	0
ENSG00000263252.1	AC005341.1	0	0	0	0	0	0	0	0	0	0	0	0	0	0	0	0
ENSG00000203593.3	AC005342.1	0	0	0.38	0.11	0	0	0	0.13	0.09	0	0.11	0.16	0	0	0	0.11
ENSG00000256706.1	AC005342.2	0	0	0	0	0	0	0	0	0	0	0	0	0	0	0	0
ENSG00000285627.1	AC005343.1	0	0	0.01	0	0	0	0.12	0.06	0.01	0.05	0	0.1	0.01	0	0	0.1
ENSG00000278255.1	AC005344.1	0	0	0	0	0	0	0	0	0	0	0	0	0	0	0	0
ENSG00000236160.1	AC005345.1	0	0	0	0	0	0	0	0	0	0	0	0	0	0	0	0
ENSG00000248493.1	AC005351.1	0	0	0.09	0	0	0	0	0	0	0	0	0	0	0	0	0
ENSG00000250994.1	AC005355.1	0	0	0	0	0	0	0	0	0	0	0	0	0	0	0	0
ENSG00000280420.1	AC005355.2	0	0	0	0	0	0	0	0	0	0	0	0	0	0	0	0
ENSG00000266906.1	AC005357.1	0	0	0	0	0	0	0	0	0	0	0	0	0	0	0	0
ENSG00000267623.3	AC005357.2	0	0	0	0	0	0	0	0	0	0	0	0	0	0	0	0
ENSG00000227274.1	AC005358.1	0	0	0	0	0	0	0	0	0	0	0	0	0	0	0	0
ENSG00000265489.1	AC005358.2	0	0	0.04	0.03	0	0	0	0.01	0.01	0.04	0	0.02	0	0.1	0	0
ENSG00000255513.1	AC005363.1	0	0	0	0	0	0	0	0	0	0	0.43	0	2.49	1.02	0	0
ENSG00000277602.1	AC005363.2	4.41	0	0	0	0	0	0	0	5.14	0	0	0	0	0	3.51	0
ENSG00000270512.1	AC005377.1	0	0	0	0	0	0	0	0	0	0	0	0	0	0	0	0
ENSG00000267159.2	AC005379.1	0	0	0	0	0	0	0	0	0	0	0	0	0	0	0	0
ENSG00000267243.6	AC005381.1	0	0	0	0	0	0	0	0	0	0	0	0	0	0	0	0
ENSG00000275024.1	AC005383.1	0	0	0.17	0	0.19	0	0	0.18	0.74	0.37	0.99	0.44	0.17	1.64	0	0.45
ENSG00000268938.2	AC005387.1	0	0	0	0	0	0	0	0	0	0	0	0	0	0	0	0
ENSG00000269191.1	AC005387.2	0	0	0	0	0	0	0	0	0	0	0	0	0	0	0	0
ENSG00000275162.1	AC005391.1	0	0	0	0	0	0	0	0	0	0	0	0	0	0	0	0
ENSG00000227606.2	AC005392.1	0	0	0	0	0	0	0	0	0	0	0	0	0	0	0	0
ENSG00000231412.2	AC005392.2	0	0	0	0	0	0	0	0	0	0	0	0	0	0	0	0
ENSG00000272396.1	AC005392.3	0	0	0	0	0	0	0	0	0	0	0	0	0	0	0	0
ENSG00000276445.1	AC005393.1	0.13	0.38	0.15	0.5	0	0	0.4	0	0	0	0	0.09	0	0.13	0.12	0.13
ENSG00000266893.1	AC005394.1	0	0	0	0	0	0	0	0	0	0	0	0	0	0	0	0
ENSG00000283403.1	AC005394.2	0	0	0	0	0	0	0	0	0	0	0	0	0	0.01	0	0.02
ENSG00000241185.2	AC005410.1	0	0	0	0	0	0	0	0	0.56	0	0	0.13	0	0	0	0
ENSG00000266368.1	AC005410.2	0	0	0	0.2	0	0	0	0	0	0.25	0	0.29	0	0	0	0
ENSG00000264050.1	AC005412.1	0	0	0	0	0	0	0	0	0	0	0	0	0	0	0	0
ENSG00000285734.1	AC005414.1	0	0	0	0	0	0	0	0	0	0	0	0	0	0	0	0
ENSG00000259079.1	AC005476.1	0	0	0	0	0	0	0	0	0	0	0	0	0	0.28	0	0
ENSG00000259146.3	AC005476.2	0	0	0	0	0	0	0	0	0	0	0	0	0	0	0	0
ENSG00000259005.1	AC005479.1	0.53	0.19	0.29	0.12	0.16	0	0	0	0	0.31	0.24	0	0.14	0.25	0	0
ENSG00000270000.1	AC005479.2	0.51	0	0	0	0.31	0	0	0	0	0	0	0	0	0	0.23	0
ENSG00000258891.1	AC005480.1	0.04	0	0	0.01	0	0	0	0	0	0	0	0.03	0.01	0.03	0	0.12
ENSG00000279461.2	AC005480.2	0	0	0	0	0	0	0	0	0	0	0	0	0	0	0	0
ENSG00000222012.1	AC005481.1	0	0	0	0	0	0	0	0	0	0	0	0	0	0	0	0
ENSG00000233423.1	AC005482.1	0	0	0	0	0	0	0	0	0	0	0	0	0	0	0	0
ENSG00000243018.1	AC005486.1	0	0	0	0	0	0	0	0	0	0	0	0	0	0	0	0
ENSG00000225647.1	AC005487.1	0	0	0	0	0	0	0	0	0	0	0	0	0	0	0	0
ENSG00000285931.1	AC005495.1	0	0	0	0	0	0	0	0	0	0	0	0	0	0	0	0
ENSG00000267224.1	AC005498.1	0	0	0	0	0	0	0	0	0	0	0	0	0	0	0	0
ENSG00000267421.6	AC005498.2	0	0	0	0.78	0.35	0.36	0.59	0.66	0.51	0.63	0.3	0.19	6.1	0.5	0.26	0
ENSG00000269696.1	AC005498.3	0.26	0.37	0.64	0.69	0.03	0.51	0.16	0.36	0.02	0.23	0.3	0.17	0.28	0.23	0.04	0.24
ENSG00000279599.1	AC005514.1	0	0	0	0	0	0	0	0	0	0	0	0	0	0	0	0
ENSG00000269460.1	AC005515.1	0	0	0	0	0	0	0	0	0	0	0	0	0	0	0	0
ENSG00000230190.1	AC005518.1	0	0	0	0	0	0	0	0	0	0	0	0	0	0	0	0
ENSG00000270634.1	AC005518.2	0	0	0	0	0	0	0	0	0	0	0	0	0	0	0	0
ENSG00000258559.2	AC005519.1	0.23	0.41	0.08	0.25	0.56	0.21	0.04	0.72	0.28	0.05	0.79	0.26	0.15	0.38	0.11	0
ENSG00000258653.3	AC005520.1	0.31	0.15	0.06	0.05	0.21	0.09	0.08	0.04	0.2	0.43	0.38	0.07	0.07	0.2	0.04	0.23
ENSG00000259065.1	AC005520.2	0.78	5.39	0.34	0.65	0.34	0.41	0.94	1.57	1.69	1.05	0.54	1.76	0.67	0.44	0	0.3
ENSG00000270140.1	AC005520.3	0	0	0	0.35	0	0	0	0.87	0	0	0.33	0	0	0	0	0
ENSG00000270576.1	AC005520.4	0	0	0	0	0	0	0	0	0	0	0	0	0	0	0	0
ENSG00000273711.2	AC005520.5	0	0	0.04	0	0.04	0.06	0	0.04	0	0.2	0.07	0.07	0.09	0	0	0
ENSG00000213296.4	AC005521.1	1.04	0.9	0.59	0.98	0.76	2.06	0.95	1.46	1.06	0.42	0.75	0.99	1.8	0.4	0.72	0.98
ENSG00000250614.1	AC005522.1	0	0	0	0	0	0	0	0	0	0	0	0	0	0	0	0
ENSG00000268536.1	AC005523.1	0	0	0	0	0	0	0	0	0	0	0	0	0	0	0	0
ENSG00000269604.1	AC005523.2	31.34	27.11	33.78	35.29	34.89	30.72	31.45	29.59	25.54	22.9	28.76	7.66	24.74	26.04	23.81	26.79
ENSG00000283269.1	AC005524.1	0	0	0.03	0	0	0	0	0.31	0	0	0	0	0	0	0.1	0.33
ENSG00000234208.1	AC005529.1	0	0	0	0	0	0	0	0	0	0	0	0	0	0	0	0
ENSG00000253183.1	AC005531.1	0	0	0	0.04	0	0.03	0.04	0.17	0.15	0	0	0.12	0	0	0	0
ENSG00000230825.1	AC005532.1	0	0	0	0	0	0	0	0	0	0.42	0	0	0	0	0	0
ENSG00000244167.1	AC005532.2	0	0	0	0	0	0	0	0	0	0	0	0	0	0	0	0
ENSG00000224903.1	AC005534.1	0	0	0	0.17	0	0	0	0	0	0	0	0	0	0.34	0	0
ENSG00000234450.1	AC005534.2	0.25	0	0	0	0	0	0	0	0	0	0	0	0	0	0	0
ENSG00000232006.8	AC005537.1	0	0.66	0	0.07	0	0	0.38	0	0.27	0	0.07	0.05	0.23	0.3	0.59	0
ENSG00000237581.1	AC005538.1	0	0	0	0	0	0	0	0	0	0	0	0	0	0	0	0
ENSG00000279809.1	AC005538.2	1.13	3.58	2.39	2.19	4.42	4.22	2.16	2.52	1.24	0	4.42	1.06	3.28	3.44	1.34	5.79
ENSG00000228937.1	AC005539.1	0	0	0	0	0	0	0	0	0	0	0	0	0	0	0	0
ENSG00000235852.1	AC005540.1	0.43	0.25	0.94	0.66	0.71	0.29	2.36	0.54	0.34	0.36	0.86	0	0.31	0.32	0.77	0.63
ENSG00000264491.1	AC005544.1	0	0	0	0	0	0	0	0	0	0	0	0	0	0	0	0
ENSG00000265664.1	AC005544.2	0	0	0	0	0	0	0	0	0	0	0	0	0	0	0	0
ENSG00000266897.1	AC005546.1	0	0	0	0	0.4	0	0	0	0.3	0	0.29	0	0	0.3	1.48	0
ENSG00000285541.1	AC005548.1	0	0	0	0	0	0	0	0	0.02	0	0.05	0.05	0	0	0	0
ENSG00000264990.1	AC005549.1	0	0	0	0	0	0	0	0	0	0	0	0	0	0	0	0
ENSG00000225974.1	AC005550.1	0	0	0	0	0	0	0	1.54	0	0	0	0	0	0	0	0
ENSG00000237070.1	AC005550.2	0	0	0	0	0	0	0	0	0	0	0	0	0	0	0	0
ENSG00000284638.1	AC005551.1	0	0	0	0	0	0	0	0	0	0	0	0	0	0	0	0
ENSG00000264174.1	AC005552.1	0	0	0	0	0	0	0	0	0	0	0	0	0	0	0	0
ENSG00000267036.2	AC005559.1	0	0	0	0	0	0	0	0	0	0	0	0	0	0	0	0
ENSG00000273609.1	AC005562.1	0	0	0	0	0	0	0	0	0	0	0	0	0	0	0	0
ENSG00000280247.1	AC005578.1	0	0	0.18	0	0	0	0	0	0	0	0	0.2	0	0	0.26	0
ENSG00000267320.5	AC005580.1	0	0	0	0	0	0	0	0	0	0	0	0	0	0	0	0
ENSG00000240449.1	AC005586.1	0.14	0.2	0.15	0.25	0.67	0.18	0.54	0	0.26	0	0.24	0	1.03	0	0	0
ENSG00000261305.2	AC005586.2	0	0	0	0	0	0	0	0	0	0	0	0	0	0	0.07	0
ENSG00000216917.2	AC005587.1	0	0	0	0	0	0	0	0	0	0	0	0	0	0.25	0	0
ENSG00000226509.1	AC005588.1	0	0	0	0	0	0	0	0	0	0	0	0	0	0	0	0
ENSG00000261757.1	AC005592.1	0	0	0	0.03	0	0	0	0	0	0	0	0	0	0	0.03	0
ENSG00000279584.1	AC005593.1	0	0.25	0.38	0	0	0.22	0	0	0.48	0.2	0.3	0.93	0.92	0	0.32	0.65
ENSG00000267223.1	AC005597.1	0	0	0	0	0	0	0	0	0	0	0	0	0	0	0	0
ENSG00000260107.1	AC005606.1	0	0	0	0	0	0	0	0	0.11	0	0	0	0	0	0	0
ENSG00000261790.1	AC005606.2	0.92	0.46	0	1.48	0	0	0	0	1.44	0.43	0.55	0	0	2.41	0	1.5
ENSG00000278901.1	AC005609.1	0	0	0	0	0.09	0	0	0	0	0	0	0	0	0	0	0
ENSG00000278907.1	AC005609.2	0	0	0	0	0.15	0	0	0	0	0	0	0	1.27	0	0	0.02
ENSG00000278915.1	AC005609.3	2.78	2.61	6.33	2.4	7.89	5.07	0	4.41	7.85	7.79	3.54	10.27	6.26	7.83	1.4	0.25
ENSG00000278946.1	AC005609.4	0	0	0.25	0	0	0	0.24	0	0.84	0.02	0	0	0.14	0.01	0.32	0
ENSG00000279726.1	AC005609.5	0.52	0.08	0.67	0.71	0	0	0	0.39	0.48	0.2	0	0.01	0.33	0.25	0	0
ENSG00000269296.1	AC005614.1	0	0.02	0.03	0	0	0.07	0.01	0	0	0	0.01	0	0.09	0.01	0.05	0.04
ENSG00000269749.1	AC005614.2	0	0	0	0	0	0	0	0	0	0	0	0	0	0	0	0
ENSG00000267423.1	AC005616.1	0	0	0	0	0	0	0	0	0.25	0.16	0	0.09	0	0	0	0
ENSG00000272070.1	AC005618.1	0.14	0.06	0.32	0.62	0	0.28	0.12	1.22	0.21	0.36	0.66	0.03	0.73	1.06	0.01	0.08
ENSG00000279855.1	AC005618.2	0	0	0.7	0	0	0	0.43	0	0	0.25	0.14	0	0	0	0	0
ENSG00000280026.1	AC005618.3	0	0.17	0.01	0	0.54	0.39	1.29	0	0	0	0.22	0.26	0.48	0	0	0
ENSG00000283525.1	AC005622.1	0	0	0	0	0	0	0	0	0	0	0	0	0	0	0	0
ENSG00000266963.1	AC005625.1	0	0	0	0	0	0	0	0	0	0	0	0	0	0	0	0
ENSG00000257639.1	AC005632.1	0	0	0	0	0	0	0	0	0	0	0	0	0	0	0	0
ENSG00000261596.2	AC005632.2	0.37	0.22	0.4	0.07	0.73	0.2	0	0.08	0.43	0.09	0.68	0.64	0.4	0.51	0.14	0.6
ENSG00000271609.1	AC005632.3	0	0	0	0	0	0	0	0	0	0	0	0	0	0	0	0
ENSG00000273956.1	AC005632.4	0	0	0	0	0	0	0	0	0	0	0	0	0	0	0	0
ENSG00000261886.1	AC005670.1	0	0	0	0	0	0	0	0	0	0	0	0	0	0	0.29	0
ENSG00000262633.2	AC005670.2	1.61	2.24	1.87	1.36	1.31	0.75	5.2	1.89	1.76	1.79	1.47	2.02	1.22	2.11	4.49	0.86
ENSG00000250413.1	AC005674.1	0	0.63	0	0	0.27	0	0.22	0	0	0	0	0	0	0	0	0
ENSG00000261490.1	AC005674.2	0.41	0.28	0.07	0.16	0.03	0.21	0.02	0.24	0.37	0.22	0.26	0.54	0.39	1.27	0.14	0.08
ENSG00000226329.2	AC005682.1	0	0	0	0	0	0	0	0	0	0	0	0	0	0	0	0
ENSG00000278860.1	AC005691.1	0	0	0	0	0	0	0	0	0	0	0	0	0	0	0	0
ENSG00000204990.3	AC005692.1	0	0	0	0	0	0	0	0	0	0	0	0	0	0	0	0
ENSG00000261629.1	AC005692.2	0	0	0	0	0	0	0	0	0	0	0	0	0	0	0	0
ENSG00000285841.1	AC005692.3	0	0	0	0	0	0	0	0	0	0	0	0	0	0	0	0
ENSG00000262966.2	AC005695.1	0	0	0	0	0	0	0	0	0	0	0	0	0	0	0	0
ENSG00000263708.2	AC005695.2	0	0	0	0	0	0	0	0	0	0	0	0	0	0	0	0
ENSG00000273816.1	AC005695.3	0	0	0	0	0	0	0	0	0	0	0	0	0	0	4.43	0
ENSG00000262050.1	AC005696.1	0.24	0	0	0.44	0	0	0	0	0	1.1	0.42	0.48	0.25	0.22	0	0
ENSG00000272770.1	AC005696.2	0	0	0	0	0	0	0	0	0	0	0	0	0	0	0	0
ENSG00000272911.1	AC005696.3	0	0	0	0	0	0	0	0	0	0	0	0	0	0	0	0
ENSG00000277200.1	AC005696.4	0.04	0.04	0.05	0.06	0	0.1	0	0.06	0.03	0.02	0.03	0.03	0	0.07	0	0.1
ENSG00000266202.1	AC005697.1	0	0	0	0	0	0	0	0	0	0	0	0	0	0	0	0
ENSG00000266527.1	AC005697.2	0	0	0	0	0	0	0	0.03	0	0	0	0	0	0	0	0
ENSG00000249631.5	AC005699.1	2.37	1.17	3.07	1.74	1.36	2.7	2.01	2.23	1.22	0.71	0.58	0.96	1.04	0.17	0.71	0.26
ENSG00000267318.1	AC005702.1	0	0	0.44	0	0	0.26	0	0	0.15	0	0.53	0.13	1.48	0	0	0
ENSG00000267526.1	AC005702.2	0	0	0	0	0	0	0	0	0.07	0	0	0	0	0	0	0.26
ENSG00000274378.1	AC005702.3	0	0	0	0	0	0	0	0	0	0	0	0	0	0	0	0
ENSG00000275860.1	AC005702.4	0	0	0	0	0	0	0	0	0	0	0	0	0	0	0	0
ENSG00000230971.1	AC005703.1	0	0	0	0	0	0	0	0	0	0	0	0	0	0	0	0
ENSG00000237377.2	AC005703.2	0	0	0	0	0	0	0	0	0	0	0	0	0	0	0	0
ENSG00000265445.1	AC005703.3	0	0	0	0	0	0	0	0	0	0	0	0	0	0.67	0	0
ENSG00000266667.1	AC005703.4	0	0	0	0	0	0	0	0	0	0	0	0	0	0	0	0
ENSG00000279567.1	AC005703.5	0	0	0	0	0	0	0	0	0	0	0	0	0	0	0	0
ENSG00000279660.1	AC005703.6	0.79	0.4	0.7	0.97	0.67	0.48	1.36	0.74	1.02	0.34	1.11	0.37	0.77	0.46	0.45	0.73
ENSG00000230607.3	AC005722.1	0	0	0	0	0	0	0	0	0	0	0	0	0	0	0	0
ENSG00000262681.2	AC005722.2	0	0	0	0	0	0	0	0	0	0	0	0	0	0	0	0
ENSG00000264785.1	AC005722.3	0	0	0	0	0	0	0	0	0	0	0	0	0	0	0	0
ENSG00000264727.1	AC005725.1	0	0	0	0	0	0	0	0	0	0	0	0	0	0	0	0
ENSG00000258472.8	AC005726.1	0.09	0.5	0.68	0.55	0.64	0.43	0.4	0.32	0.5	0.45	0.59	0.99	0.49	0.53	0.15	1.07
ENSG00000264044.1	AC005726.2	0	0	0	0.05	0	0	0	0.29	0.05	0	0.21	0	0	0	0	0
ENSG00000264608.1	AC005726.3	0	0.32	0	0	0	0	0	0.5	0	0	0	0	0	0	0	0
ENSG00000265168.1	AC005726.4	0	3.46	1.98	0.27	0	0	2.07	0	0	0	0	2.79	1.87	0	0	2.57
ENSG00000265287.2	AC005726.5	0.11	0.11	0	0	0	0	0	0	0.31	0.06	0.09	0.11	0	0.24	0	0.01
ENSG00000225681.2	AC005730.1	0	0	0	0	0	0	0	0	0	0	0	0	0	0	0	0
ENSG00000261033.1	AC005730.2	0	0	0	0	0	0	0	0	0.04	0.11	0	0	0.05	0.31	0.35	0
ENSG00000266126.1	AC005730.3	0	0	0	0	0	0	0	0	0	0	0	0	0	0	0	0
ENSG00000262185.2	AC005736.1	0.12	0.11	0	0.04	0	0	0	0.08	0	0.05	0.03	0.09	0.12	0.04	0.23	0.08
ENSG00000263159.1	AC005736.2	0	0	0	0	0	0	0	0	0	0	0	0	0	0	0	0
ENSG00000226040.3	AC005740.1	0	0	0	0	0	0	0	0	0	0	0	0	0	0	0	0
ENSG00000250347.1	AC005740.2	0	0	0	0	0	0	0	0	0.5	0	0	0	0	0	0	0
ENSG00000254099.1	AC005740.3	0	0	0	0	0	0	0	0	0	0	0	0	0	0	0	0
ENSG00000271871.1	AC005740.4	0	0.44	0.26	0.11	0.07	0	0.35	0	0.06	0.29	0.06	0	0.13	0.12	0	0
ENSG00000249418.2	AC005741.1	0	0	0	0	0	0	0	0	0	0	0	0	0	0	0	0
ENSG00000266934.1	AC005746.1	0	0	0	0	0	0	0	0	0	0	0	0	0	0	0	0
ENSG00000267131.1	AC005746.2	0	0	0	0	0	0	0	0	0	0	0	0	0	0	0	0
ENSG00000273982.1	AC005746.3	0	0	0	0	0	0	0	0	0	0	0	0	0	0	0	0
ENSG00000278925.1	AC005753.1	0	0	0	0	0	0	0	0	0	0	0	0	0	0.34	0	0
ENSG00000267044.1	AC005757.1	0	0	0	0.19	0	0	0	0	0	0	0	0	0	0	0	0
ENSG00000267630.1	AC005758.1	0	0	0	0	0	0	0	0	0	0	0	0	0	0	0	0
ENSG00000268650.3	AC005759.1	0	0	0	0	0	0	0	0	0	0	0	2.17	0	0	0	0
ENSG00000267471.1	AC005771.1	0	0	0	0	0	0	0	0	0	0	0	0	0	0	0	0
ENSG00000232058.1	AC005772.1	0	0	0	0	0	0	0	0	0	0	0	0	0	0	0	0
ENSG00000261198.1	AC005774.1	0	0	0	0	0	0	0	0	0	0	0	0	0	0	0	0
ENSG00000266933.2	AC005775.1	3.7	3.66	4.26	4.43	3.95	4.12	3.98	2.25	4.45	2.05	2.06	6.34	2.54	3.93	3.02	1.07
ENSG00000270802.2	AC005776.1	0	0	0	0.79	0	0	0	0	0	0	0	0	0	0	0	0
ENSG00000273218.1	AC005776.2	0	0	0	0	0	0	0	0.03	0	0	0	0	0	0	0	0
ENSG00000267148.1	AC005777.1	0	0	0	0	0	0	0	0	0	0	0	0	0	0	0	0
ENSG00000266958.1	AC005779.1	0	0	0	0	0	0	0	0	0	0	0	0	0	0.15	0	0
ENSG00000267545.1	AC005779.2	0	0	0	0	0	0	0	0	0	0	0	0	0.16	0.14	0	0
ENSG00000268189.2	AC005785.1	0.08	0.24	0.03	0.05	0.03	0.04	0.03	0.12	0.05	0	0	0.08	0	0.03	0.24	0
ENSG00000279203.1	AC005785.2	0	0	0	0.11	0	0	0	0.13	0	0	0.21	0	0	0.55	0	0
ENSG00000266959.1	AC005786.1	0	0	0	0	0	0	0	0	0	0	0	0	0	0	0	0
ENSG00000267231.1	AC005786.2	0	0	0	0	0	0	0	0	0	0	0	0	0	0	0	0
ENSG00000267436.1	AC005786.3	0	0	0	0	0	0	0	0	0	0	0	0	0	0	0	0
ENSG00000279590.1	AC005786.4	0	0	0	0	0	0	0	0	0	0	0	0	0	0	0	0
ENSG00000267090.1	AC005789.1	0	0	0	0	0	0	0	0	0	0	1.76	0	0	0	0	0
ENSG00000274447.1	AC005790.1	0	0	0	0.21	0	0	0	0	0	0	0	0	0	0	0.42	0.21
ENSG00000279617.1	AC005796.1	0	0	0	0	0	0	0	0	0	0	0	0	0	0	0	0
ENSG00000248188.2	AC005798.1	0	0	0	0	0	0	0	0	0	0	0	0	0	0	0	0
ENSG00000235415.1	AC005808.1	0	0	0	0	0	0	0	0	0	0	0	0	0	0	0	0
ENSG00000265702.1	AC005821.1	0.63	0.15	0.14	0	0.27	0.26	0	0.09	0	0.41	0	0	0.22	0	0	0
ENSG00000235554.1	AC005822.1	0.33	0	0	0.1	0	0	0	0	0	0	0	0.04	0.36	0.27	0	0
ENSG00000249658.1	AC005823.1	0	0	0	0	0	0	0	0	0	0	0	0	0	0	0	0
ENSG00000249982.1	AC005823.2	0	0	0	0	0	0	0	0	0	0	0	0	0	0	0	0
ENSG00000226797.1	AC005828.1	0.17	0	0	0	0	0	0	0	0.15	0	0.29	0	0	0	0	0
ENSG00000263501.1	AC005828.2	0	0	0.16	0	0	0	0	0	0	0	0	0	0	0	0.4	0
ENSG00000263644.1	AC005828.3	0	0	0	0	0	0	0	0	0	0	0	0.04	0	0	0	0
ENSG00000265282.1	AC005828.4	0	0	0	0	0	0	0	0	0	0	0	0	0	0	0	0
ENSG00000265971.1	AC005828.5	0	0	0	0	0	0	0	0	0	0	0	0	0	0	0	0
ENSG00000271749.1	AC005828.6	0	0	0	0	0	0	0	0	0	0	0	0	0	0	0	0
ENSG00000271919.1	AC005828.7	0.29	0	0	0	0.18	0	0	0	0.41	0	0	0	0	0	0	0
ENSG00000261575.2	AC005829.1	0	0	0	0.91	0	0	0	0.44	0	0	0.7	0	0.84	0	0.54	0.55
ENSG00000262539.1	AC005829.2	0.03	0	0	0.08	0	0	0	0.06	0	0.06	0	0	0	0.05	0	0
ENSG00000280202.1	AC005831.1	0	0.04	0	0.11	0	0	0.22	0.1	0.03	0	0.08	0	0.03	0.09	0	0.06
ENSG00000256381.1	AC005832.1	0	0	0	0	0	0	0	0	0	0	0	0	0.15	0	0	0
ENSG00000256748.1	AC005832.2	0	0	0	0	0	0	0	0	0	0	0	0	0	0	0	0
ENSG00000256799.1	AC005832.3	0	0	0	0	0	0	0	0	0	0	0	0	0.12	0	0.22	0
ENSG00000272921.1	AC005832.4	80.76	59.84	55.94	59.27	76.92	80.39	71.24	107.5	41.12	67.08	52.54	43.59	72.03	54.79	85.39	95.74
ENSG00000255639.3	AC005833.1	18.62	12.45	10.53	12.85	17.46	18.16	13.93	16.67	11.13	12.18	11.72	9.79	12.55	10.19	16.26	18.29
ENSG00000256988.1	AC005833.2	0	0	0	0	0	0	0	0	0	0	0	0	0	0	0	0
ENSG00000261335.1	AC005837.1	0	0.09	0.06	0.2	0.08	0.09	0.09	0.2	0.11	0.48	0.56	0.04	0.1	0.03	0.11	0.24
ENSG00000267168.1	AC005837.2	0	0	0	0	0	0	0	0	0	0	0	0	0	0	0	0
ENSG00000277382.1	AC005837.3	0	0	0	2.51	0	0	0	0	0	0	0.79	0.55	1	0	0	2.24
ENSG00000223544.1	AC005838.1	0	0	0	0	0	0	0	0	0.43	3.44	0	0	0.1	0	0	0
ENSG00000266538.1	AC005838.2	1.95	0	0	0	0	0	0	0	2.22	0	0	2.3	0	2.19	0	0
ENSG00000279089.1	AC005839.1	0.78	0.67	0.54	0.2	0.19	0.56	0.05	0.58	0.1	0.19	0.49	0.17	0.55	0.32	0.31	0.36
ENSG00000213942.3	AC005840.1	0	1.05	0	0	0.45	0	0	0	0	0	0	0	0.39	0.33	0	0
ENSG00000256433.2	AC005840.2	0	0	0	0.05	0.1	0	0.05	0	0	0.07	0.12	0.06	0	0	0	0
ENSG00000256913.1	AC005840.3	0	0	0	0	0	0	0	0	0	0	0	0	0	0	0	0
ENSG00000276718.1	AC005840.4	0.13	0	0	0.36	0	0	0	0.43	0.24	0	0	0.09	0	0	0	0
ENSG00000258092.1	AC005841.1	0	0	0	0	0	0	0	0	0	0	0	0	0	0	0	0
ENSG00000256862.2	AC005842.1	0.39	0.47	0.12	0	0	0.3	0	0.12	0.37	0.2	0.1	0	0.36	0	0.21	0.06
ENSG00000255775.1	AC005845.1	0.11	0	0	0	0.13	0	0	0.24	0	0	0	0	0	0	0	0
ENSG00000267667.1	AC005856.1	0	0	0	0	0	0	0	0	0	0	0	0	0	0	0	0
ENSG00000280272.1	AC005858.1	0	0	0	0	0	0	0	0	0	0	0	0	0	0	0	0
ENSG00000280364.1	AC005858.2	0	0	0	0	0	0	0	0	0	0	0	0	0	0	0	0
ENSG00000280398.1	AC005858.3	0	0	0	0	0	0	0	0	0	0	0	0	0	0	0	0
ENSG00000205325.1	AC005863.1	0	0	0	0	0	0	0	0	0	0	0	0	0.02	0	0	0
ENSG00000236908.2	AC005865.1	0	0	0	0	0	0	0	0	0	0	0	0	0	0	0	0
ENSG00000250770.3	AC005865.2	0	0	0	0	0	0	0	0	0	0	0	0	0	0	0.08	0.07
ENSG00000256125.1	AC005868.1	0	0	0	0	0	0	0	0	0	0	0	0	0	0	0	0
ENSG00000235198.1	AC005871.1	0	0	0	0	0	0	0	0	0	0	0	0	0	0	0	0
ENSG00000258114.1	AC005871.2	0	0	0	0	0	0	0	0	0	0	0	0	0	0	0	0
ENSG00000267207.1	AC005884.1	0	0	0	0	0	0	0	0	0	0	0	0	0	0	0	0
ENSG00000267449.1	AC005884.2	0	0	0	0	0	0	0	0	0	0	0	0	0	0	0	0
ENSG00000264083.1	AC005899.1	0	0	0	0	0	0	0	0	0	0	0	0	0	0	0	0
ENSG00000264373.1	AC005899.2	0	0	0	0	0	0	0	0	0	0	0	0	0	0	0	0
ENSG00000265139.1	AC005899.3	0.56	0	0	2.1	0	4.23	1.35	0	3.02	0	0.98	3.4	0	0	0	0.38
ENSG00000265794.5	AC005899.4	0	0	0	0	0	0	0	0	0	0	0	0	0	0	0	0
ENSG00000266385.1	AC005899.5	0	0	0	0	0	0	0	0	0	0	0	0.2	0	0	0	0
ENSG00000274341.1	AC005899.6	0	0	0	0	0	0	0	0	0	0	0	0.48	0	0	0	0
ENSG00000278668.1	AC005899.7	0	0	0	0	0	0.17	0	0	0	0	0	0	0	0	0	0
ENSG00000279762.3	AC005899.8	0.04	0	0.08	0.04	0	0.04	0.06	0.02	0.03	0	0.09	0	0.05	0.03	0.1	0.02
ENSG00000267137.1	AC005901.1	0	0	0	0	0	0	0	0	0	0	0	0	0	0	0	0
ENSG00000255996.1	AC005906.1	0	0	0	0	0	0	0	0	0	0	0	0	0	0	0	0
ENSG00000256654.3	AC005906.2	0	0	0	0	0	0	0	0	0	0	0	0	0	0	0	0
ENSG00000285523.1	AC005906.3	0	0	0	0	0	0	0	0	0	0	0	0	0	0	0	0
ENSG00000243507.1	AC005908.1	0	0	0	0	0	0	1	0	0	0	0	0	0	0	0	0
ENSG00000256691.1	AC005908.2	0	0	0	0	0	0	0	0	0	0	0	0	0	0	0	0
ENSG00000265425.1	AC005909.1	0	0	0	0	0	0	0	0	0	0	0	0	0	0	0	0
ENSG00000278356.1	AC005911.1	0	0	0	0.62	1.36	0.29	0	0.75	1.44	0.26	2.17	0.15	0	0	0.82	1.03
ENSG00000227081.5	AC005912.1	0	0	0	0	0	0	1.82	0	0	0	0	0	0	0	0	0
ENSG00000275850.1	AC005912.2	0	0	0	0	0	0	0	0	0.04	0	0	0	0	0	0	0.04
ENSG00000279446.1	AC005915.1	0	0	0	0	0	0	0	0	0	0	0	0	0	0	0	0
ENSG00000247011.2	AC005920.1	0	0	0	0	0	0	0	0	0	0.06	0	0	0.05	0	0	0
ENSG00000249870.1	AC005920.2	0	0	0	0	0	0	0	0	0	0	0	0	0	0	0	0
ENSG00000251665.1	AC005920.3	0	0	0	0	0	0	0	0	0	0	0	0	0	0	0	0
ENSG00000262006.1	AC005920.4	0	0	0	0	0	0	0	0	0	0	0	0	0	0	0	0
ENSG00000248702.1	AC005921.1	0	0	0	0	0	0	0	0	0	0	0	0	0	0	0	0
ENSG00000262967.1	AC005921.2	0.55	3.78	0.83	5.54	3.34	5.42	6.91	4.41	4.48	1.78	1.55	7.44	2.71	0.13	0	0
ENSG00000278963.1	AC005921.3	0	0	0.07	0.08	0	0.03	0.04	0.15	0.11	0	0	0.03	0	0	0.08	0.09
ENSG00000285829.1	AC005921.4	0	0	0	0	0	0	0	0	0	0	0	0	0	0	0	0
ENSG00000267059.2	AC005943.1	0	0.47	0.41	0.67	0.33	0.77	0	0.41	0.51	0.74	1.04	0	0	0	2.48	1.85
ENSG00000279009.1	AC005943.2	0	0	0	0	0	0	0	0	0	0	0	0	0	0	0	0
ENSG00000267469.1	AC005944.1	12.44	6.17	4.62	5.27	1.58	4.69	0.41	8.08	2.19	11.19	9.38	14.95	14.99	16.65	2.59	11.23
ENSG00000263199.1	AC005951.1	0	0	0	0	0	0	0	0	0	0	0	0	0	0	0	0
ENSG00000267138.1	AC005954.1	0	0	0	0	0	0	0	0	0	0	0	0	0	0	0	0
ENSG00000267205.1	AC005954.2	0.15	0	0	0.72	0.18	0.19	0.15	0	0.14	0	0.13	0.51	0.47	0.78	0	0.05
ENSG00000278627.1	AC005962.1	0	0	0	0.51	0	0.29	0	0	0	0	0	0	0	0	0	0
ENSG00000270324.1	AC005972.1	0	0	0	0	0	0	0	0	0	0	0	0	0	0	0	0
ENSG00000272164.1	AC005972.2	0	0	0	0	0	0	0	0	0	0	0	0	0	0	0	0
ENSG00000283538.2	AC005972.3	0.46	0.49	0.45	0.29	0.32	0.36	0	0.22	0.55	0.12	0.47	0.84	0.14	0.19	0.09	0.59
ENSG00000266869.1	AC005993.1	0	0	0	0	0	0	0	0	0	0	0	0	0	0	0	0
ENSG00000241456.1	AC005996.1	0	0	0	0	0	0	0	0	0	0	0	0	0	0	0	0
ENSG00000229403.1	AC005999.1	0	0	0	0	0	0	0	0	0	0	0	0	0	0	0	0
ENSG00000285741.1	AC005999.2	0	0	0	0	0	0	0	0	0	0	0	0	0	0	0	0
ENSG00000177418.2	AC006001.1	0	0	0	0	0	0	0	0	0	0	0	0	0	0	0	0
ENSG00000226824.6	AC006001.2	0	0	0.19	0.16	0.65	1.15	0.53	0.98	0.33	0.41	0.78	0.12	0.38	0.49	2.59	0.6
ENSG00000229180.7	AC006001.3	19.52	20.59	15.36	21.84	22.04	16.44	15.86	17.06	20.31	20.67	15.56	18.21	19.44	20.15	21.18	26.8
ENSG00000275400.1	AC006001.4	20.67	8.83	8.76	11	2.74	9.73	5.21	13.65	4.44	6.45	7.13	5.84	6.59	11.3	16.35	12.07
ENSG00000231515.1	AC006003.1	0	0	0	0	0	0	0	0	0	0	0	0	0	0	0	0
ENSG00000236795.1	AC006004.1	0	0	0	0	0	0	0	0	0	0	0	0	0	0	0	0
ENSG00000271611.1	AC006006.1	0	0	0	0	0	0	0	0	0	0	0	0	0	0	0	0
ENSG00000230746.1	AC006007.1	0	0	0	0	0	0	0	0	0	0	0	0	0	0	0	0
ENSG00000244563.1	AC006011.1	11.33	7.72	7.32	21.57	0	14.14	19.85	16.35	5.8	20.77	18.31	15.6	10.89	10.92	25.1	26.68
ENSG00000274010.1	AC006011.2	0.09	0	0.05	0	0	0.06	0	0	0	0	0	0	0	0	0	0
ENSG00000234215.2	AC006012.1	0	0.57	0	0	0	0	0	0	0	0	0	0	0	0	0	0
ENSG00000236531.2	AC006013.1	0	0	0	0	0	0	0	0	0	0	0	0	0	0	0	0
ENSG00000226401.3	AC006015.1	0	0	0	0	0	0	0	0	0	0	0	0	0	0	0	0
ENSG00000229591.1	AC006017.1	0	0	0	0	0	0.42	0	0.46	0.2	0	0.09	0	0	0	0	0
ENSG00000203335.4	AC006019.1	0	0	0	0	0	0	0	0	0	0	0	0	0	0	0.02	0
ENSG00000233363.1	AC006019.2	0	0	0	0	0	0	0	0	0	0	0	0	0	0	0	0
ENSG00000270114.1	AC006019.3	0	0	0	0	0	0	0	0	0	0	0	0	0	0	0	0
ENSG00000226636.1	AC006020.1	0	0	0	0	0	0	0	0	0	0	0	0	0	0	0	0
ENSG00000223419.1	AC006022.1	0	0	0	0	0	0	0	0	0	0	0	0	0	0	0	0
ENSG00000270577.1	AC006023.1	0	0	0	0	0	0	0	0	0	0	0	0.83	0	1.21	0	0
ENSG00000273444.1	AC006023.2	0	0	0	0	0	0	0	0	0	0	0	0	0	0	0	0
ENSG00000224785.1	AC006026.1	0	0	0	0.1	0.03	0	0.05	0	0.03	0.13	0.02	0	0	0	0.03	0.06
ENSG00000228953.1	AC006026.2	0	0	0	0	0	0	0	0	0	0	0	0	0	0	0	0
ENSG00000234286.1	AC006026.3	0	0	0	0	0	0	0	0	0	0	0	0	0	0	0	0
ENSG00000272638.1	AC006027.1	0	0	0	0	0	0.81	0	7.27	1.03	3.41	0	8.61	4.62	1.6	0	0
ENSG00000231357.1	AC006028.1	0	0	0	0	0	0	0	0	0	0	0	0	0	0	0	0
ENSG00000264324.1	AC006030.1	0	0	0	0	0	0	0	0	0	0	0	0	0	0	0	0
ENSG00000231916.1	AC006033.1	0	0	0	0	0	0	0	0	0	0	0	0	0	0	0	0
ENSG00000272908.1	AC006033.2	0	0	0	0	0.09	0	0	0	0	0	0	0	0.05	0	0	0.23
ENSG00000226442.2	AC006037.1	0	0	0	0	0	0	0	0	0	0	0	0	0	0	0	0
ENSG00000279218.1	AC006037.2	0	0	0	0	0	0	0	0	0	0	0	0	0	0	0	0
ENSG00000229379.1	AC006041.1	0	0	0	0	0	0	0	0	0	0	0	0	0	0	0	0
ENSG00000227719.1	AC006042.1	0	0	0	0	0	0	0	0	0	0	0	0	0	0.15	0	0
ENSG00000233108.1	AC006042.2	0	0	0	0	0	0	0	0	0	0	0	0	0	0	0	0
ENSG00000233264.2	AC006042.3	0	0	0	0	0	0	0	0	0	0	0	0	0	0	0	0
ENSG00000234141.1	AC006042.4	0.2	0.14	0.21	0.19	0.49	0.27	0.39	0.66	0	0.48	0	0	0.11	0	0.47	0.1
ENSG00000285892.1	AC006043.1	0	0	0	0	0	0	0	0	0	0	0	0	0	0	0	0
ENSG00000235886.1	AC006055.1	0	0	0	0	0	0	0	0	0	0	0	0	0	0	0	0
ENSG00000261786.1	AC006058.1	0	0	0	0	0	0	0	0	0	0	0	0	0	0	0	0
ENSG00000271192.1	AC006058.2	0	0	0	0	0	0	0	0	0	0	0	0	0	0	0	0
ENSG00000272121.1	AC006058.3	0	0.3	0	0.25	0	0	0.1	0	0.15	0	0	0	0	0	0.15	0.27
ENSG00000280435.1	AC006058.4	0	0	0	0	0	0	0	0	0	0	0	0	0	0	0	0
ENSG00000230084.5	AC006059.1	0	0	0.73	0	0	0	0	0	0	0	0	0	0	0.2	0	0.2
ENSG00000280571.2	AC006059.2	0	0	0	0	0.53	0	0	0.38	0.02	1.01	0.35	0.26	0	0.66	0.65	0
ENSG00000285539.1	AC006059.3	0	0	0	0	0	0	0	0	0	0	0	0	0	0	0	0
ENSG00000255608.1	AC006063.1	0	0.21	0	0.27	0	0	0	0	0	0	0	0	0	0	0	0
ENSG00000284513.1	AC006063.2	0	0	0	0	0	0	0	0	0	0	0	0	0	0	0	0
ENSG00000245667.2	AC006064.1	0	0	0	0	0	0	0	0	0	0.17	0	0	0	0.27	0	0
ENSG00000247853.2	AC006064.2	0.07	0	0.07	0	0.04	0	0.04	0.1	0.11	0.17	0	0	0.09	0	0.04	0.19
ENSG00000255966.1	AC006064.3	0	0	0	0	0	0	0	0	0	0	0	0	0	0	0.19	0
ENSG00000269968.1	AC006064.4	0	0	0	1.14	0.68	1.91	0	0	1.75	0	0.74	8.15	1.45	0	0.38	1.06
ENSG00000276232.1	AC006064.5	0	0	0	0	0	0	0	0	1.51	0	0	1.01	0	0	1.55	0
ENSG00000285238.2	AC006064.6	0	0	0	6.08	1.86	0	9.1	0.35	0	7.55	0.06	0	6.55	1.02	0	0.03
ENSG00000255853.1	AC006065.1	0	0	0	0	0	0	0	0	0	0	0	0	0	0	0	0
ENSG00000255900.1	AC006065.2	0	0	0	0	0	0	0	0	0	0	0	0	0	0	0	0
ENSG00000255944.1	AC006065.3	0	0	0	0	0	0	0	0	0	0	0	0	0	0	0	0
ENSG00000256732.1	AC006065.4	0	0	0	0	0	0	0	0	0	0	0	0	0	0	0	0
ENSG00000278866.1	AC006065.5	0	0	0	0	0	0	0	0	0	0	0	0	0	0	0	0
ENSG00000279171.1	AC006065.6	0	0	0	0	0	0	0	0	0	0	0	0	0	0	0	0
ENSG00000225563.1	AC006076.1	0	0	0	0	0	0	0	0	0	0	0	0	0	0	0	0
ENSG00000270892.1	AC006077.1	0	0	0	0	0	0	0	0	0	0	0	0	0	0	0	0
ENSG00000279799.1	AC006077.2	0.22	0.64	0.5	1.02	0.27	0.29	2.04	0.75	3.27	0.26	2.16	1.18	0.47	0.2	4.67	1.44
ENSG00000261938.1	AC006111.1	0	0	0	0	0	0	0	0	0	0	0	0	0	0	0	0
ENSG00000263235.1	AC006111.2	0.23	0.09	0.5	0.42	0	0.25	0	0.81	0	0.14	0.51	0.29	0.06	0.35	0.06	0.09
ENSG00000276754.1	AC006111.3	0	0	0	0	0	0	0	0	0	0	0	0	0	0	0	0
ENSG00000268352.1	AC006115.1	0	0	0	0	0	0	0	0	0	0	0	0	0	0	0	0
ENSG00000268407.1	AC006115.2	0	0	0	0	0	0	0	0	0	0	0	0	0	0	0	0
ENSG00000284729.1	AC006115.3	0	0	0	0	0	0	0	0	0	0	0	0	0	0	0	0
ENSG00000266907.1	AC006116.1	0	0	0	0	0	0.03	0	0	0.06	0	0	0	0	0	0	0
ENSG00000267776.1	AC006116.10	0	0	0.47	0	0	0	0	0	0	0	0.42	0	0	0.35	0	0
ENSG00000266932.1	AC006116.2	0	0	0	0	0	0	0	0	0	0	0	0	0	0	0	0
ENSG00000267145.1	AC006116.3	0	0	0	0	0	0	0	0	0	0	0	0	0	0	0	0
ENSG00000267192.1	AC006116.4	0	0	0	0	0	0	0	0	0	0	0	0	0	0	0	0
ENSG00000267298.1	AC006116.5	0	0	0	0	0	0	0	0	0.14	0	0	0.1	0	0.27	0	0
ENSG00000267429.1	AC006116.6	0	0	0.32	0	0	0.07	0.15	0	0.19	0	0.23	0	0.11	0.05	0	0
ENSG00000267459.1	AC006116.7	2.34	3.76	3.88	6.82	5.65	6.04	4.6	4.77	3.62	4.35	8.74	0	4.53	5.81	1.82	6.15
ENSG00000267549.5	AC006116.8	0.06	0	0.07	0	0	0.13	0.06	0.27	0.03	0.12	0	0	0	0.06	0.28	0.07
ENSG00000267606.1	AC006116.9	0	0	0	0	0	0	0	0	0	0	0	0	0	0	0	1.01
ENSG00000213970.4	AC006122.1	2.42	1.2	1.43	2.04	2.04	3.35	2.28	1.2	2.14	2.09	3.83	3.85	2.43	2.49	3.72	4.42
ENSG00000279716.1	AC006128.1	0.24	1	0.5	1.62	0.45	0.84	0.15	1.27	2.4	2.21	2.54	1.81	2.05	2.33	0.09	0.17
ENSG00000267063.1	AC006130.1	0	0	0	0	0	0	0	0	0	0	0	0	0	0	0	0
ENSG00000267398.1	AC006130.2	0	0	0	0	0	0	0	0	0	0	0	0	0	0	0	0
ENSG00000278813.1	AC006133.1	0	0	0	0	0	0	0	0	0	0	0	0	0	0	0	0
ENSG00000264895.1	AC006141.1	0	0.13	0.25	0.17	0.03	0.03	0	0.02	0.02	0	0.14	0.03	0.02	0.04	0.1	0
ENSG00000233433.1	AC006144.1	0	0	0	0	0	0	0	0	0	0	0	0.05	0	0	0	0
ENSG00000223770.5	AC006145.1	0	0.03	0	0	0	0	0	0	0	0	0	0	0	0	0	0
ENSG00000258660.1	AC006146.1	0	0.14	0	0	0.04	0	0	0	0	0	0	0	0	0.25	0	0
ENSG00000242593.5	AC006148.1	0	0	0	0	0	0	0	0	0	0	0	0	0	0	0	0
ENSG00000243574.1	AC006148.2	0	0	0	0	0	0	0	0	0	0	0	0	0	0	0	0
ENSG00000226323.1	AC006150.1	0	0	0	0	0	0	0	0	0	0	0	0	0	0	0	0
ENSG00000273299.1	AC006153.1	0	0	0	0	0	0	0	0.43	0	0	0	0	0	0	0	0
ENSG00000278847.1	AC006157.1	0	0	0	0	0	0	0	0	0	0	0	0	0	0	0	0
ENSG00000275310.1	AC006158.1	0	0	0	0	0	0	0	0	0	0	0	0	0	0	0	0
ENSG00000235427.1	AC006159.1	0	0	0	0	0	0	0	0	0	0	0	0	0	0	0	0
ENSG00000243220.1	AC006159.2	0	0	0	0	0	0	0	0	0	0	0	0	0	0	0	0
ENSG00000249502.1	AC006160.1	0	0.38	0	0.08	0	0	0	0	0	0	0	0	0	0	0	0.09
ENSG00000283219.1	AC006160.2	0	0	0	0	0	0	0	0	0	0	0	0	0	0	0	0
ENSG00000238090.1	AC006195.1	0	0	0	0	0	0.17	0	0	0	0	0	0.05	0	0	0.12	0
ENSG00000257128.1	AC006197.1	0	0	0	0	0	0	0	0	0	0	0	0	0	0	0	0
ENSG00000257629.1	AC006199.1	0	0	0	0	0	0	0	0	0	0	0	0	0	0	0	0
ENSG00000255825.1	AC006205.1	0	0	0	0	0	0	0	0	0	0	0	0	0	0	0	0
ENSG00000256020.1	AC006205.2	0	0	0	0	0	0	0	0	0	0	0	0	0	0	0	0
ENSG00000256146.1	AC006206.1	0	0	0	0	0.05	0	0	0	0	0	0	0	0	0	0	0
ENSG00000256417.1	AC006206.2	0	0.08	0	0.05	0	0	0	0	0	0	0	0	0	0	0	0
ENSG00000283138.1	AC006207.1	0	0	0	0	0	0	0	0	0	0	0	0.47	0	0	0	0
ENSG00000223391.2	AC006210.1	0	0	0	0	0	0	0	0	0	0	0	0	0	0	0	0
ENSG00000238247.2	AC006210.2	0.1	0	0	0	0	0	0.03	0	0	0	0	0	0	0	0	0
ENSG00000266921.1	AC006213.1	0.72	0.51	1.05	0.57	0.63	0.62	0.12	0.12	0.46	0.54	0.8	1.79	0.79	0.56	0.05	0.18
ENSG00000267058.1	AC006213.2	10.31	4.9	5.29	7.68	6.41	7.9	4.01	9.37	6.6	9.11	6.42	23.38	10.4	10.73	3.53	4.08
ENSG00000267191.1	AC006213.3	0	0	0	0	0.21	0	0	0	0	0	0	0	0	0	0	0.16
ENSG00000277806.1	AC006213.4	0	0	0.75	0.32	0	0	0.34	0.51	0.43	0	0.1	0.4	0.25	0.66	0	0
ENSG00000278492.1	AC006213.5	0	0	0	0	0	0	0	0	0	0	0.76	0	0.97	0	0	0
ENSG00000278917.1	AC006213.6	0.05	0.08	0.03	0.03	0.04	0.05	0	0.07	0	0.1	0.03	0.19	0.17	0.03	0.01	0
ENSG00000262961.1	AC006236.1	0	0	0	0	0	0	0	0	0	0	0	0	0	0	0	0
ENSG00000271392.1	AC006237.1	0.2	0	0	0	0	0	0	0	0	0	0	0	0	0.18	0	0
ENSG00000272799.1	AC006238.1	0.48	5.47	3.84	7.83	0	0	0.32	0.89	0.59	0	0	0.65	0	0	0.74	0.61
ENSG00000285653.1	AC006238.2	0	0	0.06	0	0.13	0	0	0	0.1	0	0	0	0.06	0	0	0
ENSG00000274578.1	AC006249.1	0	0.3	0.69	0	0	0.27	0	0	0	0	0	0.14	0.22	0	0	0
ENSG00000243224.1	AC006252.1	0	0.22	0.34	0.65	0.13	0.2	0	0	0.25	0.65	0.18	0.19	0	0.05	0.86	0.51
ENSG00000243696.4	AC006254.1	0	0	0	0.02	0	0	0	0.01	0	0	0.01	0.01	0.02	0.05	0	0
ENSG00000270941.1	AC006254.2	0	0	0	0	0	0	0	0	0	0	0	0	0	0	0	0
ENSG00000271137.1	AC006254.3	0	0	0	0	0	0	0	0	0	0	0	0	0	0	0	0
ENSG00000268460.1	AC006262.1	0	0	0	0	0	0.02	0	0	0	0	0	0.01	0	0	0	0
ENSG00000269729.1	AC006262.2	0.25	0	0	0	0.3	0.16	0.49	0	0	0.15	0	0	0.13	0	0	0
ENSG00000269745.1	AC006262.3	0	0	0	0	0	0	0	0	0	0	0	0	0	0	0	0
ENSG00000277748.1	AC006262.4	0	0	0	0	0	0	0	0	0	0	0	0	0	0	0	0
ENSG00000264513.1	AC006270.1	0	0	0	0	0	0	0	0	0	0	0	0	0	0	0	0
ENSG00000264529.1	AC006270.2	0	0	0	0	0	0	0	0	0	0	0	0	0	0	0	0
ENSG00000272383.1	AC006270.3	0	0	0	0	0	0	0	0	0	0	0	0	0	0	0	0
ENSG00000268316.1	AC006272.1	0	0	0	0	0	0	0	0	0	0	0	0	0	0	0	0
ENSG00000269483.2	AC006272.2	0	0	0	0	0	0	0	0	0	0	0	0	0	0	0	0
ENSG00000272473.1	AC006273.1	0.21	0.1	0.3	0	0	0	0.34	0.16	1.35	0.77	0.64	0.82	0.08	0.14	0.07	0.14
ENSG00000279452.1	AC006277.1	0.16	0.31	0.29	0	0	0	0.06	0.03	0.15	0	0.06	0.25	0	0.18	0.68	0.9
ENSG00000260970.1	AC006288.1	0	0	0	0	0	0	0	0	0	0	0	0	0	0	0	0
ENSG00000248425.1	AC006296.1	0	0	0	0	0	0	0	0	0	0	0	0	0	0	0	0
ENSG00000251412.1	AC006296.2	0	0	0	0	0	0	0	0	0	0	0	0	0	0	0	0
ENSG00000246225.6	AC006299.1	0.23	1.01	1.04	0.11	0.28	0.31	0	0	0.88	0.7	1.37	0.08	0.28	1.56	0.33	0.8
ENSG00000206129.4	AC006305.1	0.05	0.16	0.14	0	0.07	0	0.13	0.03	0	0	0	0	0.03	0.05	0.05	0.03
ENSG00000267399.1	AC006305.2	0	0	0	0	0	0	0	0	0	0	0	0	0	0	0	0
ENSG00000267732.1	AC006305.3	0	0	0	0	0	0	0	0	0	0	0	0	0	0	0	0
ENSG00000230785.2	AC006326.1	0	0	0	0	0	0	0	0	0	0	0	0	0	0	0	0
ENSG00000233619.1	AC006328.1	0	0	0	0	0	0	0	0	0	0	0	0	0	0	0	0
ENSG00000284380.1	AC006328.2	0	0	0	0	0	0	0	0	0	0	0	0	0	0	0	0
ENSG00000232445.1	AC006329.1	0	0.55	0.52	1.63	0	0	0	0.32	0.09	0	0	0	0	0	1.81	5.53
ENSG00000278683.1	AC006329.2	0	0	0	0.59	0	0	0	0	0	0	0	0	0	0	0	0
ENSG00000280388.1	AC006330.1	0.12	0.07	0.18	0	0	0.07	0	0.16	0.12	0.12	0.11	0.04	0.24	0.1	0.12	0.28
ENSG00000230442.5	AC006333.1	0	0	0	0	0	0	0	0	0	0	0	0	0	0	0	0
ENSG00000272686.1	AC006333.2	3.63	5.55	4.02	5.07	2.92	3.55	1.7	2.47	3.26	5.17	3.32	1.67	2.69	2.53	3.12	2.8
ENSG00000235094.2	AC006335.1	0	0	0	0	0	0	0	0	0	0	0	0	0	0	0	0
ENSG00000242879.1	AC006335.2	0	0	0	0	0	0	0	0	0	0	0	0	0	0	0	0
ENSG00000275352.1	AC006335.3	0	0	0	0	0	0	0	0	0	0	0	0	0	0	0	0
ENSG00000278197.1	AC006338.1	0	0	0	0	0	0	0	0	0	0	0	0	0	0	0	0
ENSG00000278602.1	AC006338.2	0	0	0	0	0	0	0	0	0	0	0	0	0	0	0	0
ENSG00000258513.1	AC006349.1	0	0	0	0	0	0	0	0	0	0	0	0	0	0	0	0
ENSG00000229110.1	AC006355.1	0	0.24	0	0	0	0	0	0	0	0	0	0	0	0	0	0
ENSG00000281120.1	AC006355.2	0	0	0	0	0	0	0	0	0	0	0	0	0	0	0	0
ENSG00000230033.1	AC006357.1	0	0	0	0	0	0	0	0	0	0	0	0	0	0	0	0
ENSG00000261778.1	AC006362.1	0	0	0	0	0	0	0	0	0	0	0	0	0	0	0	0
ENSG00000270611.1	AC006363.1	0	0	0	0	0	0	0	0	0	0	0	0	0	0	0	0
ENSG00000244000.1	AC006366.1	0	0	0	0	0	0	0	0	0	0	0	0	0	0	0	0
ENSG00000236213.1	AC006369.1	0	0	0	0	0	0	0	0	0	0	0	0	0	0	0	0
ENSG00000236572.1	AC006369.2	0	0	0	0	0	0	0	0	0	0	0	0	0	0	0	0
ENSG00000223872.1	AC006372.1	0	0	0	0	0	0	0	0	0	0	0	0	0	0	0	0
ENSG00000233191.2	AC006372.2	0	0	0	0	0	0	0	0	0	0	0	0	0	0	0	0
ENSG00000234210.1	AC006372.3	0	0	0	0	0	0	0	0	0	0.01	0	0	0	0	0	0
ENSG00000280266.1	AC006372.4	0	0	0	0	0	0	0	0	0	0	0	0	0	0	0	0
ENSG00000236861.6	AC006378.1	0	0	0	0	0	0	0	0	0	0	0	0	0	0	0	0
ENSG00000278959.1	AC006378.2	0	0	0	0	0	0.03	0	0.02	0	0	0	0	0.02	0	0	0
ENSG00000271027.1	AC006380.1	0	0	0	0	0	0	0	0	0	0	0	0	0	0	0	0
ENSG00000274899.1	AC006386.1	0	0	0	0	0	0	0	0	0	0	0	0	0	0	0	0
ENSG00000279115.2	AC006386.2	0	0	0	0	0	0	0	0	0	0	0	0	0	0	0	0
ENSG00000243193.4	AC006387.1	0.43	0	0	0	0	0.53	0.16	0	0	0	0.23	1.59	0.11	0.15	0	0
ENSG00000251638.1	AC006390.1	0	0	0	0	0	0	0	0	0	0	0	0	0	0	0	0
ENSG00000248851.1	AC006427.1	0	0	0	0	0	0	0	0	0	0	0	0	0	0	0	0
ENSG00000262456.1	AC006435.1	0.31	0.19	0.29	0.2	0	0	0	0.09	0.31	0	0.11	0.09	0	0	0	0.24
ENSG00000263345.1	AC006435.2	0	0.34	0	0.07	0	0	0	0.32	0	0	0	0	0	0	0	0
ENSG00000274758.1	AC006435.3	0	0	0	0	0	0	0	0	0	0	0	0	0	0	0	0
ENSG00000279872.1	AC006435.4	14.98	7.66	22.48	8.49	10.33	4.5	6.62	7.15	9.31	6.78	9.48	5.42	13.08	19.34	13.87	22.09
ENSG00000280280.1	AC006435.5	0	0	0	0	0	0	0	0	0	0	0	0	0	0	0	0
ENSG00000263466.1	AC006441.1	0	0	0	0.23	0	0	0	0	0	0	0	0	0	0	0	0
ENSG00000265428.1	AC006441.2	0	0	0	0	0	0	0	0	0	0	0	0	0	0	0	0
ENSG00000265784.1	AC006441.3	0	0	0	0	0	0	0	0	0	0	0	1.15	0	0	0	0
ENSG00000266588.1	AC006441.4	0	0	0	0	0	0	0	0	0	0	0	0	0	0	0	0
ENSG00000277426.1	AC006441.5	0	0	0	0	0	0	0	0	0	0	0	0	0	0	0	0
ENSG00000242209.1	AC006445.1	0	0	0	0	0	0	0	0	0	0	0	0	0	0	0	0
ENSG00000249148.2	AC006445.2	0	0	0	0	0	0	0	0	0	0	0	0	0	0	0	0.58
ENSG00000274996.1	AC006449.1	0	0	0	0	0	0	0	0	0	0	0	0	0	0	0	0
ENSG00000275532.1	AC006449.2	0	0	0	0	0.24	0	0	0	0	0	0	0	0	0	0	0
ENSG00000275665.1	AC006449.3	0	0	0	0	0	0	0	0	0	0	0	0	0	0	0	0
ENSG00000277182.1	AC006449.5	0.52	0.35	0.24	0.39	0.14	0	0.16	0.32	0.24	0.31	0.44	0.28	0.2	0.51	0.46	0.21
ENSG00000277969.1	AC006449.6	1.13	1.44	0.96	1.52	0.4	0.39	0.63	1	1.74	1.82	0.94	1.22	1.56	1.09	0.3	0.26
ENSG00000279119.1	AC006449.7	0.41	1.69	4.36	0	0.12	1.97	1.37	0	0.04	0.08	0.59	0	0	0	0	0
ENSG00000231227.1	AC006450.1	0	0	0	0	0	0	0	0	0	0	0	0	0	0	0	0
ENSG00000234921.1	AC006450.2	0	0	0	0	0	0	0	0	0	0	0	0	0	0	0	0
ENSG00000236668.2	AC006450.3	0	0	0	0	0	0	0	0	0	0	0	0	0	0	0	0
ENSG00000285904.1	AC006452.1	0	0	0.01	0	0	0	0	0	0.02	0	0	0	0	0.01	0	0
ENSG00000283132.1	AC006453.1	0	0	0	0	0	0	0	0	0	0	0	0	0	0	0	0
ENSG00000283196.2	AC006453.2	20.93	21.24	19.03	13.12	15.85	10.49	9.85	5.4	29.6	28.08	16.41	37.6	14.38	8.98	66.9	45.61
ENSG00000283214.1	AC006453.3	0	0	0	0	0	0	0	0	0	0	0	0	0	0	0	0
ENSG00000283427.1	AC006453.4	0	0	0	0	0	0	0	0	0	0	0	0	0	0	0	0
ENSG00000283659.1	AC006453.5	0	0	0	0	0	0	0	0	0	0	0	0	0	0	0	0
ENSG00000226587.1	AC006455.1	0	0	0	0	0	0	0	0	0	0	0	0	0	0	0	0
ENSG00000227545.1	AC006455.2	0	0	0	0	0	0	0	0	0	0	0	0	0	0	0	0
ENSG00000227923.1	AC006455.3	0	0	0	0	0	0	0	0	0	0	0	0	0	0	0	0
ENSG00000229301.1	AC006455.4	0	0	0	0	0	0	0	0	0	0	0	0	0	0	0	0
ENSG00000230000.2	AC006455.5	0	0	0	0	0	0	0	0	0	0	0	0	0	0	0	0
ENSG00000232165.1	AC006455.6	0	0	0	0	0	0	0	0	0	0	0	0	0	0	0	0
ENSG00000236638.1	AC006455.7	0	0	0	0	0	0	0	0	0	0	0	0	0	0	0	0
ENSG00000244550.1	AC006455.8	0	0	0	0	0	0	0	0	0	0	0	0	0	0	0	0
ENSG00000230132.1	AC006457.1	0	0	0	0	0	0	0	0	0	0	0	0	0	0	0	0
ENSG00000227489.1	AC006458.1	0	0	0	0	0	0	0	0	0	0	0	0	0	0	0	0
ENSG00000228509.5	AC006460.1	0	0.11	0	0.26	0	0	0	0	0	0	0	0	0	0	0	0
ENSG00000284052.1	AC006460.2	1.2	0.1	0.15	0.2	0	0	0.02	0.02	0.04	0.07	0	0	0	0	0.1	0.28
ENSG00000228568.1	AC006461.1	0	0	0	0	0	0	0	0	0	0	0	0	0	0	0	0
ENSG00000225795.1	AC006463.1	0	0	0	0	0	0	0	0	0	0	0	0	0	0	0	0
ENSG00000232887.1	AC006466.1	0	0	0	0	0	0	0	0	0	0	0	0	0	0	0	0
ENSG00000228019.1	AC006480.1	0	0	0	0	0	0	0	0	0	0	0	0	0	0	0	0
ENSG00000273448.1	AC006480.2	0.1	0.26	0.13	0.38	0.35	0.06	0.05	0.15	0.13	0.29	0.39	0.75	0.19	0.24	0.25	0.12
ENSG00000228675.1	AC006482.1	0	0	0	0	0	0	0	0	0	0	0	0	0	0	0	0
ENSG00000228974.5	AC006483.1	0	0	0	0	0	0	0	0	0.58	0	0	0	0	0	0	0
ENSG00000272719.1	AC006483.2	0	0	0	0.32	0	0	0	0	0	0	0	0	0	0	0	0
ENSG00000223841.1	AC006484.1	0	0	0	0	0	0	0	0	0	0	0	0	0	0	0	0
ENSG00000268643.1	AC006486.1	0	0	0	0	0	0	0	0	0	0	0	0	0	0	0	5.54
ENSG00000279539.1	AC006486.2	0.3	0.19	0.11	0.27	0.05	0.12	0.02	0	0.25	0.13	0.2	0.44	0.21	0.11	0.31	0.07
ENSG00000249906.1	AC006487.1	0	0	0	0.01	0	0	0	0	0	0	0	0	0	0	0	0
ENSG00000250310.2	AC006487.2	0	0	0	0	0	0	0	0	0	0	0	0	0	0	0	0
ENSG00000248777.1	AC006499.1	0	0	0	0	0	0	0	0	0	0	0	0	0	0	0	0
ENSG00000250074.1	AC006499.2	0	0	0	0	0	0	0	0	0	0	0	0	0	0	0	0
ENSG00000250505.1	AC006499.3	0	0	0	0	0	0	0	0	0	0	0	0	0	0	0	0
ENSG00000250573.1	AC006499.4	0	0	0	0	0	0	0	0	0	0	0	0	0	0	0	0
ENSG00000251278.1	AC006499.5	0	0	0	0	0	0	0	0	0	0	0	0	0	0	0	0
ENSG00000251296.1	AC006499.6	0	0	0	0	0	0	0	0	0	0	0	0	0	0	0	0
ENSG00000251338.1	AC006499.7	0	0	0	0	0	0	0	0	0	0	0	0	0	0	0	0
ENSG00000271544.1	AC006499.8	0	0	0	0	0	0	0	0	0	0	0	0	0	0	0	0
ENSG00000261770.1	AC006504.1	0	0.61	0.09	0	0.03	0	0	0	0.08	0	0.2	0.04	0.21	0	0	0.17
ENSG00000266977.1	AC006504.2	0	0	0	0	0	0	0	0	0	0	0	0	0	0	0	0
ENSG00000267264.1	AC006504.3	0	0	0.18	0	0	0	0	0	0	0	0.15	0	0.71	0	0.31	0.63
ENSG00000267389.2	AC006504.4	0	0	0	0	0	0	0.09	0	0	0	0	0	0	0	0	0
ENSG00000267575.6	AC006504.5	3.59	5.16	4.5	10.32	5.62	4.48	5.18	6.23	6.96	7.02	10.37	2.87	4.32	7.22	6.95	8.19
ENSG00000267768.1	AC006504.6	0	0	0	0	0	0	0	0	0	0	0	0	0	0	0	0
ENSG00000272635.1	AC006504.7	0	0	0	0	0	0	0	0	0	0	0	0	0	0	0	0
ENSG00000281468.1	AC006504.8	0.11	0	0.62	1.29	0.42	0.15	0	0.9	0.22	0	0.52	0	0.12	0.55	0.54	0.79
ENSG00000224058.2	AC006509.1	0	0	0	0	0	0	0	0	0	0	0	0	0	0	0	0
ENSG00000224443.1	AC006509.2	0	0	0	0	0	0	0	0	0	0	0	0	0	0	0	0
ENSG00000240739.1	AC006511.1	0	0	0	0	0	0	0	0	0	0	0	0	0	0	0	0
ENSG00000255581.1	AC006511.2	0	0.46	0	0	0	0	0	0.12	0	0.13	0.19	0	0	0	0	0.11
ENSG00000279865.1	AC006511.3	0	0	0.2	0.16	0.2	0.23	0	0.18	0.29	0.27	0.15	0.1	0	0.11	0.37	0.14
ENSG00000282080.1	AC006511.4	0	0	0	0	0	0	0	0	0	0	0	0	0	0	0	0
ENSG00000284697.1	AC006511.5	0	0.52	0	0	0	0	0	0	0	0	0	0.09	0	0.23	0	0
ENSG00000239701.1	AC006512.1	0	0	0	0	0	0	0	0	0	0	0	0	0	0	0	0
ENSG00000257078.1	AC006512.2	0	0	0	0	0	0	0	0	0	0	0	0	0	0	0	0
ENSG00000241828.2	AC006517.1	0	0	0	0	0	0	0	0	0	0	0	0	0	0	0	0
ENSG00000256651.1	AC006518.1	0	0	0	0	0	0	0	0	0.06	0	0	0.31	0	0	0	0.06
ENSG00000256682.2	AC006518.2	0.06	0.36	0	0	0.15	0.08	0	0	0	0	0.11	0	0	0.18	0	0
ENSG00000284826.1	AC006518.7	1.2	0.93	1.35	3.34	0.58	0.23	0.79	2.48	0.72	0.6	1.05	0.96	1.11	1.54	0.6	0.2
ENSG00000240579.1	AC006529.1	0	0	0.25	0.11	0	0	0	0.38	0	0	0	0	0	0	0	0.11
ENSG00000258587.1	AC006530.1	0	0.4	0	0	0	0	0	0	0	0	0	0	0	0	0	0
ENSG00000261342.1	AC006538.1	0.13	0.14	0.23	0.33	0.04	0.22	0.18	0.28	0.24	0.12	0.09	0.09	0.03	0.44	0	0.46
ENSG00000267001.1	AC006538.2	0	0	0	0	0	0	0	0	0	0	0	0	0	0	0	0
ENSG00000276097.1	AC006538.3	0	0	0	0	0	0	0	0	0	0	0	0	0	0	0	0
ENSG00000240673.1	AC006539.1	0.18	1.04	0	0.34	0.22	0.47	0.37	0.61	0.17	0.64	0.48	0.61	0.19	0.34	0	0.17
ENSG00000268070.1	AC006539.2	0.14	0	0	0	0	0	0	0	0.39	0	0	0	0	0	0	0
ENSG00000274033.1	AC006539.3	0	0	0	0	0	0	0	0	0	0	0	0	0	0	0	0
ENSG00000236540.7	AC006547.1	0.82	1.06	0.4	0.82	0.82	0.95	0.29	1.93	0.28	0.7	0.87	2.23	1.53	3.24	0.21	0.71
ENSG00000243762.1	AC006547.2	0	0.88	0	0	0	1.61	0	0	2.98	0	0	1.89	0	0	0	0
ENSG00000268292.1	AC006547.3	0	0	0	0	0	0	0	0	0	0	0.57	0	0	0	0	0
ENSG00000225480.1	AC006548.1	0	0	0	0	0	0	0	0	0	0	0	0	0	0	0	0
ENSG00000270226.1	AC006548.2	0	0	0	0	0	0	0	0	0	0	0	0	0	0	0	0
ENSG00000285045.1	AC006548.3	0	0	0	0	0	0	0	0	0	0	0	0	0	0	0	0
ENSG00000267150.1	AC006557.1	0	0	0.16	0	0	0	0	0.28	0	0	0	0	0	0	0	0.1
ENSG00000267324.1	AC006557.2	0	0	0	0	0	0	0	0	0	0	0	0	0	0	0	0
ENSG00000267356.1	AC006557.3	0	0	0	0	0	0	0	0	0	0	0	0	0	0	0	0
ENSG00000267756.1	AC006557.4	0	0.68	0	0	0	0	0.17	0	0	0	0	0	0	0	0.17	0
ENSG00000270469.1	AC006557.5	0	0	0	0	0	0	0	0	0.15	0	0	0	0.33	0	0	0
ENSG00000279352.1	AC006557.6	9.92	12.17	14.37	11.37	5.03	11.52	7.85	17.35	5.33	8.03	11.62	14.34	9.4	8.47	6.57	8.67
ENSG00000273368.1	AC006566.1	0.17	0.49	0.19	0.16	0	0	0.35	0.77	0.8	1.41	0.31	0.94	0.74	0.32	0	0
ENSG00000257105.1	AC006581.1	0	0	0	0	0	0	0	0	0	0	0	0	0	0	0	0
ENSG00000282022.1	AC006581.2	0.9	0.32	0	0	0	0	0	0	0	0	0	0	0	0	0	0
ENSG00000261882.1	AC006600.1	0	0	0	0	0	0	0	0	0	0	0	0	0	0	0	0
ENSG00000279606.1	AC006600.2	0	0	0	0	0	0	0	0	0	0	0	0	0	0	0	0
ENSG00000279918.1	AC006840.1	0	0	0	0	0	0	0	0	0	0	0	0	0	0	0	0
ENSG00000275314.1	AC006924.1	0	0	0	0	0	0	0	0	0	0	0	0	0	0	0	0
ENSG00000255977.1	AC006927.1	0	0	0	0	0	0.72	0	0.21	0	0	0.33	0	0.2	0	0	0
ENSG00000284327.1	AC006927.2	0	0	0	0	0	0	0	0	0	0	0	0	0	0	0	0
ENSG00000284522.1	AC006927.3	0	0	0	0	0	0	0	0	0	0	0	0	0	0	0	0
ENSG00000284591.1	AC006927.4	0	0	0	0	0	0	0	0	0	0	0	0	0	0	0	0
ENSG00000285142.1	AC006927.5	0	0	0	0	0	0	0	0	0	0	0	0	0	0	0	0
ENSG00000269194.1	AC006942.1	0.17	0.96	0	0	0.21	0.44	0	0	0.31	0	0.3	0	0	0	0.47	0
ENSG00000235328.1	AC006946.1	0	0	0	0	0	0	0	0	0	0	0	0	0	0	0	0
ENSG00000273203.1	AC006946.2	0	0	0	0	0	0	0	0	0	0	0	0	0	0	0	0
ENSG00000273442.1	AC006946.3	0	0	0	0	0	0	0	0	0	0	0	0	0	0	0	0
ENSG00000229330.2	AC006947.1	0	0	0	0	0	0	0	0	0	0	0	0	0	0	0	0
ENSG00000234457.1	AC006960.1	0	0	0	0	0	0	0	0	0	0	0	0	0	0	0	0
ENSG00000237400.1	AC006960.2	0	0	0	0	0	0	0	0	0	0	0	0	0	0	0	0
ENSG00000260070.1	AC006960.3	0	0	0	0	0	0.26	0	0	0	0	0	0	0	0	0	0
ENSG00000279587.1	AC006963.1	0.21	0.38	0.11	0.1	0	0	0	0.41	0.36	0.13	0.15	0.12	0.06	0	0.2	0
ENSG00000224341.1	AC006965.1	0	0	0	0	0	0	0	0	0	0	0	0	0	0	0	0
ENSG00000229365.3	AC006967.1	0	0	0	0	0	0	0	0	0	0	0	0	0	0	0	0
ENSG00000236102.2	AC006967.2	0	0	0	0	0	0	0	0	0	0	0	0	0	0	0	0
ENSG00000269446.2	AC006967.3	0	0	0	0	0	0	0	0	0	0	0	0	0	0	0	0.1
ENSG00000230191.1	AC006970.1	0	0	0	0	0	0	0	0	0	0	0	0	0	0	0	0
ENSG00000233028.1	AC006970.2	0	0	0	0	0	0	0	0	0	0	0	0	0	0	0	0
ENSG00000285670.1	AC006970.3	0	0	0	0	0	0	0	0	0	0	0	0	0	0	0	0
ENSG00000218586.3	AC006971.1	0	0	0.02	0	0	0	0.02	0.05	0.02	0	0	0	0	0	0	0
ENSG00000285666.1	AC006972.1	0	0	0	0	0	0	0	0	0	0	0	0	0	0	0	0
ENSG00000283504.1	AC006974.1	0	0	0	0	0	0	0	0	0	0	0	0	0	0	0	0
ENSG00000283648.1	AC006974.2	0	0	0	0	0	0	0	0	0.04	0	0	0	0	0	0	0
ENSG00000235859.5	AC006978.1	0.43	0.5	0.18	0.49	0.42	0.59	0.08	0.48	1.2	0.21	0.55	0.19	0.09	0.13	0.16	0.31
ENSG00000281593.1	AC006978.2	0	0	0	0	0	0	0	0	0	0	0	0.15	0.36	0	0	0
ENSG00000274445.1	AC006986.1	0	0	0	0	0	0	0	0	0	0	0	0	0	0	0	0
ENSG00000226975.1	AC006987.1	0	0.23	0	0	0	0	0	0	0	0	0	0	0	0	0	0
ENSG00000235193.1	AC006987.2	0	0	0	0	0	0	0	0	0	0	0	0	0	0	0	0
ENSG00000235691.1	AC006987.3	0	0	0	0	0	0	0	0	0	0	0	0	0	0	0	0
ENSG00000278478.1	AC006987.4	0	0	0	0	0	0	0	0	0	0	0	0	0	0	0	0
ENSG00000224518.2	AC006989.1	0	0	0	0	0	0	0	0	0	0	0	0	0	0	0	0
ENSG00000231063.1	AC006994.1	0	0	0	0	0	0	0	0	0	0	0	0	0	0	0	0
ENSG00000279317.2	AC006994.2	0	0	0	0	0	0	0	0.2	0	0	0	0	0	0	0	0
ENSG00000213542.3	AC007000.1	0.08	0	0.51	0.08	0	0	0	0.15	0	0	0	0.06	0.09	0.15	0.3	0.08
ENSG00000225726.1	AC007000.2	0	0	0	0	0	0	0	0	0	0	0	0.13	0	0.36	0	0
ENSG00000259628.1	AC007000.3	0	0	0	0	0	0	0	0	0	0	0	0	0	0	0	0
ENSG00000267055.1	AC007001.1	0	0	0	0	0	0	0	0	0	0	0	0	0	0	0	0
ENSG00000231183.3	AC007003.1	0	0	0	0	0	0	0	0	0	0	0	0	0	0	0	0
ENSG00000244239.1	AC007009.1	8.58	14.48	12.26	14	11.92	20.76	14.85	11.89	24.35	22.56	17.04	40.95	21.75	20.93	0.7	0
ENSG00000259963.1	AC007012.1	0	0	0	0	0	0	0	0	0	0	0	0	0	0	0	0
ENSG00000278975.1	AC007012.2	0	0	0	0	0	0	0	0	0	0	0	0	0	0	0	0
ENSG00000262020.1	AC007014.1	0	0	0	0	0	0	0	0	0	0	0	0	0	0	0	0
ENSG00000274038.1	AC007014.2	0	1.15	0.22	0.74	0	0.78	0	1.34	0.55	0	0.18	0.4	0.43	1.85	0	0.37
ENSG00000249930.1	AC007016.1	0	0	0	0	0	0	0	0	0	0	0	0	0	0	0	0
ENSG00000271185.1	AC007029.1	0	0	0	0	0	0	0	0	0	0	0	0	0.71	0	0	0
ENSG00000273320.1	AC007032.1	0	0	0	0.76	0.31	0.76	1.13	0	0	0	0.48	0	0	0.11	0.81	1.24
ENSG00000227017.1	AC007036.1	0	0	0	0	0	0	0	0	0	0	0	0	0	0	0	0
ENSG00000230751.1	AC007036.2	0	0	0	0	0	0	0	0	0	0	0	0	0	0	0	0
ENSG00000251660.1	AC007036.3	0.55	1.47	1.16	0.76	0	0.04	0.18	0	0.11	0.1	0	0.11	0	0	0.78	0
ENSG00000229127.1	AC007038.1	0	0.06	0	0.18	0	0.09	0.06	0.07	0	0	0.04	0	0.05	0.06	0.02	0.07
ENSG00000272807.1	AC007038.2	0.53	0.64	0	0.08	0.33	0.36	0	0.59	0.17	0	0.16	0.57	0.1	0.09	0	0.09
ENSG00000228384.4	AC007040.1	0	0	0	0	0	0	0	0	0	0	0	0	0	0	0	0
ENSG00000258881.6	AC007040.2	0.01	0	0.01	0.01	0	0	0	0.01	0.01	0.03	0	0.02	0.03	0	0.23	0.16
ENSG00000235411.1	AC007041.1	0.09	0	0.15	0	0.06	0	0	0.1	0	0	0	0	0	0	0.04	0
ENSG00000237358.1	AC007064.1	0	0	0	0	0	0	0	0	0	0	0	0	0	0	0	0
ENSG00000237689.1	AC007064.2	0	0	0	0	0	0	0	0	0	0	0	0	0	0	0.5	0
ENSG00000237835.1	AC007064.3	0	0	0	0	0	0	0	0	0	0	0	0	0	0	0	0
ENSG00000283535.1	AC007064.4	0	0	0	0	0	0	0	0	0	0	0	0	0	0	0	0
ENSG00000213216.2	AC007066.1	0	0	1.22	0	0	0.45	0	0.8	0	0.4	0	0.23	0	0	0.63	0.31
ENSG00000261094.2	AC007066.2	0.48	0.87	0.05	0.18	0.38	0.2	0.13	0.85	0.22	0.27	0.51	0.09	0	0.02	1.61	1.14
ENSG00000213443.2	AC007068.1	0.61	1.61	0.18	1.52	0.07	0.59	1.15	1.41	0.48	0.3	0.48	1.89	0.88	1.64	0.49	1.14
ENSG00000256912.1	AC007068.2	0	0	0	0	0	0	0	0	0	0	0	0	0	0	0	0
ENSG00000223838.1	AC007091.1	0	0	0	0	0	0	0	0	0	0	0	0	0	0	0	0
ENSG00000285673.1	AC007092.1	0	0	0	0	0	0	0	0	0	0	0	0.07	0	0.06	0.06	0
ENSG00000231609.6	AC007098.1	0.02	0	0	0.02	0	0.03	0	0.03	0.16	0.1	0.31	0.38	0.03	0.09	0	0.02
ENSG00000237162.1	AC007098.2	0	0	0	0	0	0	0	0	0	0	0	0	0	0	0	0
ENSG00000231172.2	AC007099.1	0	0	0.05	0.04	0	0.06	0	0.05	0	0	0.04	0.03	0	0.04	0.09	0.05
ENSG00000237293.1	AC007099.2	0	0	0	0	0	0	0	0	0	0	0	0	0	0	0	0
ENSG00000271955.2	AC007100.1	0	0	0	0	0	0	0	0	0	0	0	0	0	0	0	0
ENSG00000251410.1	AC007106.1	0	0	0	0	0	0	0	0	0	0	0	0	0	0	0	0
ENSG00000263004.1	AC007114.1	0	0.41	0.78	0.98	0.4	0.26	0.19	0.32	0.63	0.79	0.68	0.69	1.16	1.59	0.09	0.66
ENSG00000263089.1	AC007114.2	0	0	0	0	0	0	0	0	0.02	0	0	0	0	0	0	0
ENSG00000258148.2	AC007115.1	0	0	0	0	0	0	0	0	0	0	0	0	0	0	0	0
ENSG00000250497.1	AC007126.1	0.06	0.09	0.04	0.11	0.08	0.11	0.03	0.2	0.04	0.21	0.14	0.06	0.08	0.12	0.09	0.11
ENSG00000229970.3	AC007128.1	0	0	0	0	0.1	0.2	0.06	0	0	0	0	0.04	0	0.03	0	0
ENSG00000272328.1	AC007128.2	0	0	0.34	0.57	0.19	0.4	0	0.33	0.23	0	0.27	0	0	0.57	0.14	0.73
ENSG00000285611.1	AC007132.1	0	0	0	0	0	0	0	0	0	0	0	0	0	0	0	0
ENSG00000267180.1	AC007136.1	0	0	0	0	0	0	0	0	0	0	0	0	0	0	0	0
ENSG00000262516.1	AC007151.1	0	0	0	0	0	0	0	0	0	0	0	0	0	0	0	0
ENSG00000261146.1	AC007159.1	0	0	0	0	0	0	0	0	0	0	0	0	0	0	0	0
ENSG00000176043.5	AC007160.1	0	0	0	0	0	0	0	0	0	0	0	0	0	0	0.54	0
ENSG00000234718.7	AC007161.1	0	0	0	0	0	0	0	0	0	0	0	0	0	0.2	0	0
ENSG00000270314.1	AC007161.2	0	0	0	0	0	0	0	0	0	0	0	0	0	0	0	0
ENSG00000283549.1	AC007161.3	0.42	0.17	0	0.78	0	0	0.34	0.64	0.33	0.14	0	0	0	0	0.11	0
ENSG00000230408.3	AC007163.1	0	0	0.07	0	0	0.09	0	0	0.07	0.17	0	0	0.22	0.07	0	0
ENSG00000231815.2	AC007179.1	0	0	0	0	0	0	0	0	0	0	0	0	0	0	0	0
ENSG00000233891.7	AC007179.2	0	0	0	0	0	0	0	0	0	0	0	0	0	0	0	0
ENSG00000270447.1	AC007179.3	0	0	0	0	0	0	0	0	0	0	0	0	0	0	0	0
ENSG00000224721.1	AC007182.1	0	0	0.04	0.05	0.11	0.26	0.06	0.1	0	0.08	0.06	0	0.03	0.2	0	0.1
ENSG00000242951.1	AC007182.2	0	0	0	0	0	0	0	0	0	0	0	0	0	0	0	0
ENSG00000279407.1	AC007191.1	0.08	0.1	0.27	0.46	0.15	0.02	0	0.25	0.1	0.1	0.39	0.2	0.43	0.23	0.22	0.39
ENSG00000268173.3	AC007192.1	0	0	0	0	0	0	0	0	0	0	0	0	0	0	0	0
ENSG00000269145.2	AC007192.2	0	1.46	0	0	0.55	0	0	0.34	0	0	0.16	2.3	0	0.5	0	0.92
ENSG00000268810.1	AC007193.1	0	0	0	0	0	0	0	0.23	0	0	0	0	0	0.27	0	0
ENSG00000269124.1	AC007193.2	0	0.3	0	0	0	0	0	0	0	0	0	0	0	0	0	0
ENSG00000269151.1	AC007193.3	0	0	0	0	0	0	0	0	0	0	0	0	0	0	0	0
ENSG00000273791.1	AC007204.1	0	0	0	0	0	0.19	0	0	0	0	0	0	0.32	0	0	0
ENSG00000274800.1	AC007204.2	0	0	0	0	0	0	0	0	0	0	0	0	0	0	0	0
ENSG00000242444.3	AC007207.1	0	0	0	0	0	0	0	0	0.28	0	0	0	0	0.28	0	0
ENSG00000256969.1	AC007207.2	0	0	0	0	0	0	0	0	0	0	0	0	0	0	0	0
ENSG00000242329.1	AC007215.1	0	0	0	0	0	0	0	0	0	0	0	0	0	0	0	0
ENSG00000260488.1	AC007216.1	0	1.82	0.14	0	0	0	0	0	0.12	0.15	0.11	0	0	0	0.12	0
ENSG00000261216.1	AC007216.2	0	0	0	0	0	0	0	0	0	0	0	0.22	0	0	0	0
ENSG00000261560.1	AC007216.3	0.07	0	0.18	0.03	0	0	0.1	0.26	0	0	0.03	0.5	0.04	0.07	0	0.07
ENSG00000263307.1	AC007216.4	0.14	0	0	0	0	0	0	0	0	0	0	0	0	0	0	0
ENSG00000277458.1	AC007216.5	0	0	0	0	0	0	0	0	0	0	0	0	0	0	0	0
ENSG00000260362.1	AC007218.1	0	0	0	0	0	0	0	0	0	0	0	0.15	0	0.1	0	0
ENSG00000283221.1	AC007218.2	0	0	0	0	0	0	0	0	0	0	0	0	0	0	0	0
ENSG00000263033.2	AC007220.1	0	0	0	0	0	0	0	0	0	0	0	0	0	0	0	0
ENSG00000260071.1	AC007221.1	0.16	0	0	0	0	0	0	0	0	0	0	0	0	0	0	0
ENSG00000283003.1	AC007221.2	0	0	0	0	0	0	0	0	0	0	0.06	0.09	0	0	0	0
ENSG00000260835.1	AC007223.1	0	0	0	0	0	0	0	0	0	0	0	0	0	0	0	0
ENSG00000260764.1	AC007224.1	0	0	0	0	0	0	0	0	0	0	0	0	0	0	0	0
ENSG00000279357.1	AC007224.2	0	0	0	0	0	0	0	0	0	0	0	0	0	0	0	0
ENSG00000260782.1	AC007225.1	0.03	0	0	0.05	0	0	0	0.06	0	0	0	0	0	0	0.03	0.28
ENSG00000261725.1	AC007225.2	0	0	0	0	0	0	0	0	0	0	0	0	0	0	0	0
ENSG00000268568.1	AC007228.1	0.31	0.23	0.33	0.3	0.19	0.16	0.12	0.22	0.31	0.1	0.44	0.15	0	0.32	0	0
ENSG00000267544.1	AC007229.1	1.46	2.47	3.9	0.52	3.85	0.73	1.19	4.83	0.52	2.62	1.5	2.61	1.22	1.3	4.15	2.83
ENSG00000226230.1	AC007237.1	0	0	0	0	0	0	0	0	0	0	0	0	0	0	0	0
ENSG00000231043.3	AC007238.1	0	0	0	0	0	0	0	0.03	0.03	0.11	0.03	0.12	0	0.03	0	0
ENSG00000284681.2	AC007240.1	0.37	0.45	0.48	0	0	0.08	0	0.33	0	0.27	0.11	0	0	0	0.06	0.87
ENSG00000285872.1	AC007240.2	0.03	0.19	0.08	0.15	0	0.43	0.05	0	0.1	0.22	0.02	0.19	0	0.08	0.22	0.05
ENSG00000282909.2	AC007241.1	0	0	0	0	0	0	0	0	0	0	0	0	0	0	0	0
ENSG00000217258.2	AC007249.1	0	0	0	0	0	0	0	0	0	0	0	0	0	0	0	0
ENSG00000257135.5	AC007249.2	0.18	0.16	0.03	0.19	0	0.12	0.18	0	0.17	0	0.49	0	0	0	0.23	0
ENSG00000273063.1	AC007250.1	0	0	0	0	0	0	0	0	0	0	0	0	0	0	0	0
ENSG00000235653.1	AC007253.1	0	0	0	0	0	0	0	0	0	0	0	0	0	0	0	0
ENSG00000223813.2	AC007255.1	0	0	0.22	0	0	0	0	0	0	0	0	0	0	0	0.19	0
ENSG00000270196.1	AC007255.2	0	0	0	0	0	0	0	0	0	0	0	0	0	0	0	0
ENSG00000213090.2	AC007256.1	0.05	0.1	0.09	0.02	0	0.05	0.08	0.06	0.02	0.04	0.02	0.04	0.24	0.07	0.03	0.35
ENSG00000271656.1	AC007262.1	0	0	0	0	0	0	0	0	0	0	0	0	0	0	0	0
ENSG00000284959.1	AC007262.2	0.27	0.42	0.22	0.69	0.29	0.35	0.37	0.55	0.47	0.3	0.3	0.37	0.33	0.41	0.22	0.36
ENSG00000232719.1	AC007272.1	0	0	0	0	0	0	0	0	0	0	0	0	0	0	0	0
ENSG00000223422.1	AC007274.1	0	0	0	0	0	0	0	0	0	0	0	0	0	0	0	0
ENSG00000236690.2	AC007274.2	0	0	0	0	0	0	0	0	0	0	0	0	0	0	0	0
ENSG00000275280.1	AC007274.3	0	0	0	0	0	0	0	0	0	0	0	0	0	0	0	0
ENSG00000278854.1	AC007275.1	0	0	0	0	0	0	0	0	0	0	0	0	0	0	0	0
ENSG00000213981.8	AC007277.1	0	0	0	0	0	0	0	0	0	0	0	0	0	0	0	0
ENSG00000234389.1	AC007278.1	0	0	0	0	0	0	0	0	0	0	0	0	0	0	0	0
ENSG00000236525.1	AC007278.2	0	0	0	0	0	0	0	0	0	0	0	0	0	0	0	0
ENSG00000230799.1	AC007279.1	0	0	0	0	0	0	0	0	0	0	0	0	0.16	0	0	0
ENSG00000234431.2	AC007283.1	0	0	0	0	0	0	0	0	0	0	0	0.25	0	0	0	0
ENSG00000235579.1	AC007283.2	0	0	0	0	0	0	0	0	0	0	0	0	0	0	0	0
ENSG00000227014.6	AC007285.1	0.28	0.4	0.21	0.56	0.26	0.22	0.22	0.41	0.31	0.47	0.71	0.43	0.23	0.68	1.12	1.13
ENSG00000231519.1	AC007285.2	0.34	0	0	0.47	0.21	0	0	0.57	0.16	0.79	0.6	0	0.18	0.63	0.31	0.16
ENSG00000267980.1	AC007292.1	0.18	0	0	0	0	0.24	0	0.1	0	0	0.08	0	0.19	0	0	0.09
ENSG00000269318.1	AC007292.2	0.08	0.15	0.06	0.1	0.07	0	0.26	0.03	0.26	0	0.2	0.16	0.03	0.19	0.13	0.08
ENSG00000269807.1	AC007292.3	0	0	0	0	0	0	0	0	0	0	0	0	0	0	0	0
ENSG00000257715.1	AC007298.1	0	0	0	0	0	0	0	0	0	0	0	0	0	0	0	0
ENSG00000257878.1	AC007298.2	0	0	0	0	0	0.14	0	0.05	0	0	0	0	0	0	0	0
ENSG00000272600.1	AC007308.1	0	0	0	0	0	0	0	0	0	0	0	0	0	0	0	0
ENSG00000224946.1	AC007312.1	0	0	0	0	0	0	0	0	0	0	0	0	0	0	0	0
ENSG00000234818.1	AC007314.1	0	0	0	0	0	0	0	0	0	0	0	0	0	0	0	0
ENSG00000285898.1	AC007317.1	0	0	0	0	0	0	0	0	0	0	0	0	0	0	0	0
ENSG00000172974.11	AC007318.1	0.12	0.03	0	0	0	0	0	0	0.23	0.02	0	0.36	0	0	0	0
ENSG00000273763.2	AC007318.2	0.48	0.2	0.1	3.41	0.22	0.28	0.13	0.35	0.18	0.11	0.17	1.23	0.19	0.18	0.16	3.07
ENSG00000224063.5	AC007319.1	0.3	1.22	1.06	0.93	0.58	2.22	0.15	0.83	3.55	0.09	0.27	0.34	0.75	4.69	0.15	7.21
ENSG00000227444.1	AC007322.1	0	0	0	0	0	0	0	0	0	0	0	0	0	0	0	0
ENSG00000229725.1	AC007322.2	0	0	0	0	0	0	0	0	0	0	0	0	0	0	0	0
ENSG00000237968.1	AC007322.3	0	0	0	0	0	0	0	0	0	0	0	0	0	0	0	0
ENSG00000251618.1	AC007322.4	0	0	0	0	0	0	0	0	0	0	0	0	0	0	0	0
ENSG00000271275.1	AC007326.1	0	0	0	0	0	0	0	0	0	0	0	0	0	0	0	0
ENSG00000280418.1	AC007326.2	0	0	0	0	0	0	0	0	0	0	0	0	0	0	0	0
ENSG00000283583.1	AC007326.3	0	0	0	0	0	0	0	0	0	0	0	0	0	0	0	0
ENSG00000283809.1	AC007326.4	0.82	0	0	0	0.62	0.86	0	0	1.07	0.8	0	0.93	0	1.23	2.42	0.92
ENSG00000284294.1	AC007326.5	0.77	2.06	1.02	1.44	0	1.08	1.64	2.63	0.62	10.35	1.44	2.37	3.92	2.32	0.86	1.55
ENSG00000228770.1	AC007327.1	0	0	0	0	0	0	0	0	0	0	0	0	0	0	0	0
ENSG00000229679.1	AC007327.2	0	0	0	0	0	0	0	0	0	0	0	0	0	0	0	0
ENSG00000260478.1	AC007333.1	0	0	0	0	0	0	0	0	0	0	0	0	0	0	0	0
ENSG00000260975.1	AC007333.2	0	0	0	0	0	0	0	0	0	0	0	0	0	0	0	0
ENSG00000261997.1	AC007336.1	0	0.03	0.04	0.01	0.09	0	0.03	0.08	0.03	0	0.05	0.05	0.04	0.01	0	0.01
ENSG00000274508.1	AC007336.2	0	0	0	0	0	0	0	0	0	0	0	0	0	0	0	0
ENSG00000279030.1	AC007336.3	0	0	0	0	0	0	0	0	0	0.08	0	0	0	0	0	0
ENSG00000259926.1	AC007342.1	0	0.28	0	0	0	0	0	0	0.18	0	0	0	0.1	0	0	0
ENSG00000259962.1	AC007342.2	0	0	0	0	0	0	0	0	0	0	0	0	0	0	0	0
ENSG00000260078.3	AC007342.3	0	0	0	0	0	0	0	0	0	0	0	0	0	0	0	0
ENSG00000261804.1	AC007342.4	0.56	0.13	0.1	0.7	0.11	0.25	0.46	0.83	0.09	0.67	0.5	0	0.1	0.22	0.09	1.01
ENSG00000262714.1	AC007342.5	0	0	0	0	0	0	0	0	0	0	0	0	0	0	0	0
ENSG00000279344.1	AC007342.6	0	0.03	0	0.02	0	0	0	0	0	0	0.03	0.05	0	0	0	0.06
ENSG00000279722.1	AC007342.7	0.12	0.12	0.11	0.32	0.07	0.28	0.13	0.16	0.08	0.2	0.22	0.15	0.15	0.52	0	0.08
ENSG00000279741.1	AC007342.8	0	0	0	0	0	0	0	0	0	0	0	0	0	0	0	0
ENSG00000280027.1	AC007342.9	0	0	0	0	0	0	0	0	0	0	0	0	0	0	0	0
ENSG00000260850.2	AC007344.1	0	0	0	0	0	0	0	0	0	0	0	0	0	0	0	0
ENSG00000260258.2	AC007346.1	0	0	0	0	0	0	0	0	0	0	0	0	0	0	0	0
ENSG00000260939.1	AC007346.2	0	0	0	0	0	0	0	0	0	0	0	0	0	0	0	0
ENSG00000261049.2	AC007347.1	0	0	0	0	0	0	0	0	0	0	0	0	0	0	0	0
ENSG00000280454.1	AC007347.2	0	0	0	0	0	0	0	0	0	0	0	0	0	0	0	0
ENSG00000229424.1	AC007349.1	0	0	0	0	0	0	0	0	0	0	0	0	0	0	0	0
ENSG00000230831.1	AC007349.2	0	0	0.16	0	0	0	0	0	0	0	0	0	0	0	0	0
ENSG00000235728.1	AC007349.3	0	0	0	0	0	0	0	0	0	0	0.06	0	0	0	0	0
ENSG00000272984.1	AC007349.4	0	0	0	0	0	0	0	0	0	0	0	0	0	0	0	0
ENSG00000236951.5	AC007359.1	0	0	0	0	0	0	0	0	0	0	0	0	0	0	0	0
ENSG00000225216.6	AC007362.1	0.34	0	0	0	0.73	0	0	0.17	0	0	0	0	0	0.95	0	0
ENSG00000270677.1	AC007363.1	0	0	0	0	0	0	0	0	0	0	0	0	0	0	0	0
ENSG00000231969.1	AC007364.1	1.44	1.79	1.31	0.11	0.55	0.31	0.61	0.87	0.16	0	0.78	0.32	0.43	0.28	0.97	0.66
ENSG00000226756.1	AC007365.1	0	0.67	0.89	0.11	0.14	0.16	0.23	0.26	0	0.7	0.11	0.41	0.38	0.33	0.44	0.46
ENSG00000227791.3	AC007365.2	0	0	0	0	0	0	0	0	0	0	0	0	0	0	0	0.41
ENSG00000255595.3	AC007368.1	0	0	0	0	0	0	0	0	0	0	0	0	0	0	0	0
ENSG00000256494.1	AC007368.2	0	0	0	0	0	0	0	0	0	0	0	0	0	0	0	0
ENSG00000250098.1	AC007370.1	0	0	0	0	0	0	0	0	0	0	0	0	0	0	0	0
ENSG00000250371.1	AC007370.2	0	0	0	0	0	0	0	0	0	0	0	0	0	0	0	0
ENSG00000259164.1	AC007375.1	0	0	0	0	0	0	0	0	0	0	0	0	0	0	0	0
ENSG00000269883.1	AC007375.2	0.04	0	0	0	0	0	0	0	0	0	0	0	0	0	0	0
ENSG00000258566.2	AC007376.1	0	0	0	0	0	0	0	0	0	0	0	0	0	0	0	0
ENSG00000258569.1	AC007376.2	0	0.22	0.17	0.87	0	0	1.09	0	0.29	0.18	0.14	0.21	0.83	0.58	0	0
ENSG00000273090.1	AC007378.1	0	0	0.45	0	0	0	0	0	0	0	0	0.13	0	0	0	0
ENSG00000279519.1	AC007382.1	0.19	0.36	0.17	0.71	0.46	0.22	0.24	0.25	0.19	0.26	0.24	0.81	0.23	0.26	0	0.11
ENSG00000159186.4	AC007383.1	0	0	0.25	0	0	0	0	0	0	0	0	0	0	0	0	0
ENSG00000227946.1	AC007383.2	2.23	6.52	2.14	4.29	4.55	4.43	2.73	4.21	2.19	2.63	4.1	2.48	3.66	3.17	1.85	2.15
ENSG00000231955.1	AC007383.3	0	0.18	0	0.31	0	0	0.12	0.35	0	0	0.02	0.03	0	0	0	0
ENSG00000237513.1	AC007384.1	0	0	0	0.06	0	0	0.2	0	0.1	0.12	0	0.21	0	0	0	0
ENSG00000227394.1	AC007386.1	0	0	0	0	0	0	0	0	0	0	0	0	0	0	0	0
ENSG00000224646.2	AC007387.1	0	0	0	0	0	0	0	0	0	0	0	0	0	0	0	0
ENSG00000231312.6	AC007388.1	12.42	10.25	17.46	25.57	26.37	22.81	32.73	15.36	34.12	29.12	35.46	53.48	34.47	29.85	20.93	29.4
ENSG00000204929.12	AC007389.1	0.08	0	0.13	0	0	0	0	0	0	0	0	0	0	0	0.05	0.47
ENSG00000223739.1	AC007389.2	0	0	0	0	0	0	0	0	0	0	0	0	0	0	0	0
ENSG00000235725.1	AC007389.3	0.21	0.58	0.99	0.52	0.32	0.81	0.6	0.2	0.94	0.38	0.36	0.88	0.49	0.38	0.25	0.35
ENSG00000237979.1	AC007389.4	0	0	0	0	0	0	0	0	0	0	0	0	0.09	0	0	0.08
ENSG00000281920.1	AC007389.5	0	0	0	0	0	0	0	0	0.08	0	0.08	0	0	0	0.08	0
ENSG00000233159.1	AC007390.1	0	0	0	0	0	0	0	0	0	0	0	0	0	0	0	0
ENSG00000272054.1	AC007390.2	0	0.02	0.02	0.04	0.01	0.02	0	0.08	0	0	0.03	0.03	0.03	0	0.06	0.09
ENSG00000232028.1	AC007391.1	0	0	0	0	0	0	0	0.2	0	0	0	0	0	0	0	0
ENSG00000285925.1	AC007391.2	0.29	0	0.39	0	0.09	0	0	0	0	0	0	0	0	0	0.07	0
ENSG00000223604.1	AC007394.1	0	0	0.18	0.3	0	0	0	0	0	0	0	0	0	0	0	0
ENSG00000231386.1	AC007395.1	0	0	0	0	0	0	0.1	0	0.1	0	0.09	0	0	0.2	0	0
ENSG00000231918.1	AC007402.1	0	0	0	0	0	0.02	0	0	0	0	0	0	0	0.04	0	0
ENSG00000223859.1	AC007403.1	0	0	0	0	0	0	0	0	0	0	0	0	0	0	0	0
ENSG00000234350.4	AC007405.1	0	0.03	0.14	0	0	0.24	0	0.1	0	0	0	0	0	0.12	0	0
ENSG00000235934.1	AC007405.2	0.17	0.22	0	0.28	0	0.2	0.17	0.51	0.14	0	0.41	0.42	0	0	0	0
ENSG00000239467.5	AC007405.3	0.22	0.15	0	0.1	0.26	0.33	0.42	1.08	0.5	0.77	0.58	0.8	0	0.41	0.1	0
ENSG00000255671.1	AC007406.1	0	0	0	0	0	0	0	0	0	0	0	0	0	0	0	0
ENSG00000255746.1	AC007406.2	0	0	0	0	0	0	0	0	0	0	0	0	0	0	0	0
ENSG00000256540.1	AC007406.3	4.95	7.43	6.32	15.52	7.88	10.34	3.11	13.08	1.03	0.26	0.1	0.35	0.88	0.42	2.74	0.71
ENSG00000256577.2	AC007406.4	0.08	0	0	0	0	0	0	0	0	0	0	0	0	0	0	0
ENSG00000261799.1	AC007406.5	4.68	6.21	4.05	5.98	2.49	3.72	3.68	5.69	2.89	3.6	4.23	1.08	4.22	4.45	2.05	3.7
ENSG00000224173.1	AC007422.1	0	0	0.06	0	0	0	0	0	0	0	0	0	0	0	0	0
ENSG00000235495.1	AC007422.2	0	0	0	0	0	0	0	0	0	0	0	0	0	0	0	0
ENSG00000271239.1	AC007423.1	0	0	0	0	0	0	0	0	0	0	0	0	0	0	0	0
ENSG00000257501.6	AC007424.1	0	0.02	0	0	0	0.04	0	0	0	0	0.09	0	0	0	0	0
ENSG00000263499.1	AC007431.1	0	0	0	0	0	0	0	0	0	0	0	0	0	0	0	0
ENSG00000266100.1	AC007431.2	0	0	0	0	0	0	0	0	0	0	0	0	0	0	0	0
ENSG00000280028.1	AC007431.3	0	0	0	0	0	0	0	0	0	0	0	0	0	0	0	0
ENSG00000227187.1	AC007435.1	0	0	0	0	0	0	0	0	0	0	0.25	0	0	0	0	0
ENSG00000264093.1	AC007448.1	0	0	0	0	0	0	0	0	0	0	0	0	0	0	0	0
ENSG00000264421.1	AC007448.2	0	0	0	0	0	0	0	0	0	0	0	0	0	0	0	0
ENSG00000266473.1	AC007448.3	0.5	0.57	0	0.19	0.12	0	0	0	0	0	0.09	1.06	0	0	0	0
ENSG00000285877.1	AC007448.4	0.02	0.05	0.06	0.16	0	0.03	0.21	0	0.05	0.05	0.03	0.04	0.06	0.15	0	0.06
ENSG00000256237.1	AC007450.1	0	0	0	0	0	0	0	0	0	0	0	0	0	0	0	0
ENSG00000274551.1	AC007450.2	0	0	0	0	0	0	0	0	0	0	0	0	0	0	0	0
ENSG00000277705.1	AC007450.3	0	0	0	0	0	0	0	0	0	0	0	0	0	0	0	0
ENSG00000278654.1	AC007450.4	0	0	0	0	0	0	0	0	0	0	0	0	0	0	0	0.16
ENSG00000256708.1	AC007458.1	0	0	0	0	0	0	0	0	0	0	0	0	0	0	0	0
ENSG00000226506.5	AC007463.1	0	0	0	0	0	0	0	0	0	0	0	0	0	0	0	0
ENSG00000275710.1	AC007485.1	0	0	0	0	0	0	0	0	0	0	0	0	0	0	0	0
ENSG00000279059.1	AC007485.2	2.05	1.07	1.31	1.92	1.02	0.77	0.63	1.45	0.63	1.02	1.49	0.35	1.2	1.29	0.86	1.51
ENSG00000279427.1	AC007490.1	0	0	0	0	0	0	0.19	0	0.09	0	0	0.34	0	0.19	0	0
ENSG00000283258.1	AC007491.1	0	0	0	0	0	0	0	0	0	0	0	0	0	0	0	0
ENSG00000260573.3	AC007493.1	0	0	0	0	0	0	0	0.03	0	0	0	0	0	0	0	0
ENSG00000261393.1	AC007493.2	0	0	0	0	0	0	0	0	0	0	0	0	0	0	0	0
ENSG00000260012.1	AC007494.1	0	0	0.18	0	0	0	0	0	0	0	0	0	0	0	0	0.26
ENSG00000260744.1	AC007494.2	0.17	0	0	0	0	0	0	0	0.08	0	0.38	0.12	0	0	0	0
ENSG00000279509.1	AC007494.3	0	0	0.57	0	0	0	0	0	0	0.21	0.16	0	0.19	0.17	0	0.35
ENSG00000246379.7	AC007495.1	0	0	0.05	0	0	0	0	0	0	0	0	0	0	0	0	0.47
ENSG00000260041.5	AC007495.2	0	0	0	0	0	0	0	0	0	0	0	0	0	0	0	0
ENSG00000260194.1	AC007496.1	0	0	0.1	0	0	0	0	0	0	0.11	0	0	0	0	0	0
ENSG00000261630.1	AC007496.2	0	0	0	0	0	0	0.3	0	0.28	0	0	0	0	0	0	0
ENSG00000280392.1	AC007496.3	0	0	0.03	0	0	0	0	0	0	0	0.01	0	0	0	0	0
ENSG00000275191.1	AC007497.1	0	0	0	0	0	0	0	0	0	0	0	0	0	0	0	0
ENSG00000258272.1	AC007513.1	0	0	0	0	0	0	0	0	0	0	0	0	0	0	0	0
ENSG00000256306.1	AC007527.1	0	0	0	0	0	0	0	0	0	0	0	0	0	0	0	0
ENSG00000277935.1	AC007527.2	0	0	0	0	0	0	0	0	0	0	0	0	0	0	0	0
ENSG00000255871.2	AC007529.1	0	0	0	0	0	0	0	0	0	0	0	0	0	0	0	0
ENSG00000283240.1	AC007529.2	0	0	0	0	0	0	0	0	0	0	0	0	0	0	0	0
ENSG00000261369.1	AC007533.1	0	0.2	0	0	0.09	0	0	0	0	0	0	0	0.23	0	0	0
ENSG00000255356.2	AC007536.1	0.61	0	0	0	0.4	0	0	1.24	3.45	0.03	2.09	0	0	0	0.75	0.52
ENSG00000198134.3	AC007537.1	0	0	0	0	0	0	0	0	0	0	0	0	0.6	0	0	0
ENSG00000242405.2	AC007537.2	0	0	0.38	0	0	0	0	0	0	0	0	0.16	0	0	0	0.16
ENSG00000257579.1	AC007540.1	0	0	0	0	0	0	0	0	0	0	0	0	0	0	0	0
ENSG00000260329.1	AC007541.1	1.01	0.95	1.09	0.72	0.3	0.57	0.47	0.58	0.43	0.38	0.57	0.56	0.53	0.24	0.37	0.9
ENSG00000277595.1	AC007546.1	0	0	0	0	0	0.19	0	0	0	0	0	0	0.16	0.14	0	0
ENSG00000279360.1	AC007546.2	0	0	0	0	0	0	0	0	0	0	0	0	0	0	0	0
ENSG00000213155.4	AC007547.1	0	0	0	0	0	0	0	0	0	0	0	0	0	0	0	0
ENSG00000239805.1	AC007547.2	0	0	0	0	0	0	0	0	0	0	0	0	0	0	0	0
ENSG00000285546.1	AC007547.3	0	0	0	0	0	0	0	0	0	0	0	0	0	0	0	0
ENSG00000232736.1	AC007551.1	0	0	0	0	0	0	0	0	0	0	0	0	0	0	0	0
ENSG00000274328.1	AC007551.2	0	0	0	0	0	0	0	0	0	0	0	0	0	0	0	0
ENSG00000256450.1	AC007552.1	0	0	0	0	0	0	0	0	0	0	0	0	0	0	0	0
ENSG00000256564.1	AC007552.2	0	0	0	0	0.62	0	0	0	0	0	0	0	0	0	0	0
ENSG00000235321.1	AC007556.1	0	0	0	0	0	0	0	0	0	0	0	0	0	0	0	0
ENSG00000227021.1	AC007557.1	0	0	0	0	0	0	0	0	0	0	0	0	0	0	0	0
ENSG00000231597.1	AC007557.2	0	0	0	0	0	0	0	0	0	0	0	0	0	0	0	0
ENSG00000236295.1	AC007557.3	0	0	0	0	0	0	0	0	0	0	0	0	0	0	0	0
ENSG00000237479.1	AC007557.4	0	0	0	0	0	0	0	0	0	0	0	0	0	0	0	0
ENSG00000235993.1	AC007559.1	0	0	0	0	0	0	0	0	0	0	0	0	0	0	0	0
ENSG00000238165.1	AC007560.1	0	0	0	0	0	0	0	0	0	0	0	0	0	0	0	0
ENSG00000235583.2	AC007562.1	0	0	0	0	0	0	0	0	0	0	0	0	0	0	0	0
ENSG00000229352.1	AC007563.1	0	0	0	0	0	0	0	0	0	0	0	0	0	0	0	0
ENSG00000236886.2	AC007563.2	0	0	0	0	0	0	0	0	0	0	0	0	0	0	0	0
ENSG00000237930.1	AC007563.3	0	0	0	0	0	0	0	0	0	0	0	0	0	0	0	0
ENSG00000244055.1	AC007566.1	0	0	0	0	0	0.43	0	0.8	0	0.73	0.59	0.49	0.74	0.7	0	0.58
ENSG00000270453.1	AC007566.2	0	0	0	0	0	0	0	0	0	0	0	0	0	0	0	0
ENSG00000224136.1	AC007568.1	0	0	0	0	0	0	0	0	0	0	0	0	0	0	0	0
ENSG00000257221.3	AC007569.1	0	0	0	0	0	0	0	0	0	0	0	0	0	0	0	0
ENSG00000255655.1	AC007570.1	0	0.16	0	0	0	0	0.11	0	0	0	0	0	0.41	0	0.24	0
ENSG00000263279.1	AC007595.1	0	0	0	0	0	0	0	0	0	0	0	0	0	0	0	0
ENSG00000260723.1	AC007598.1	0	0	0	0	0	0	0	0	0	0	0	0	0	0	0	0
ENSG00000261394.1	AC007598.2	0	0	0	0	0	0	0	0	0	0	0	0	0	0	0	0
ENSG00000278979.1	AC007598.3	0	0	0	0	0.04	0	0	0	0.06	0	0.05	0	0	0	0	0
ENSG00000259866.1	AC007599.1	0	0	0	0	0	0	0	0	0	0	0	0	0	0	0	0
ENSG00000262038.1	AC007599.2	0	0.27	0	0	0	0	0	0	0	0	0	0	0	0	0	0
ENSG00000175604.2	AC007601.1	0	0	0	0	0	0.07	0	0	0	0	0.04	0.02	0.05	0	0	0
ENSG00000261293.1	AC007601.2	0	0	0	0	0	0	0	0	0	0	0	0	0	0	0	0
ENSG00000261751.1	AC007603.1	0	0	0	0	0	0	0	0	0	0	0	0	0	0	0	0
ENSG00000279842.1	AC007603.2	0	0	0	0	0	0	0	0	0	0	0	0	0	0	0	0
ENSG00000283365.1	AC007603.3	0	0	0	0	0	0	0	0	0	0	0	0	0	0	0	0
ENSG00000205414.1	AC007608.1	0	0	0	0	0.02	0	0	0	0	0	0	0	0	0	0	0
ENSG00000260029.2	AC007608.2	0	0	0	0	0	0	0	0	0	0	0	0	0	0	0	0
ENSG00000260249.2	AC007608.3	0	0	0	0	0	0	0	0	0	0.24	0	0	0	0	0	0
ENSG00000278909.1	AC007608.4	0	0	0	0	0.02	0	0	0.07	0	0	0	0	0	0	0	0.03
ENSG00000259843.2	AC007610.1	0	0	0	0	0	0	0	0	0	0	0	0.12	0	0	0	0
ENSG00000260381.2	AC007610.2	0	0	0	0	0	0	0	0	0	0	0	0	0	0	0	0
ENSG00000261835.1	AC007610.3	0	0	0	0	0	0	0	0	0	0	0	0	0	0	0	0
ENSG00000279356.1	AC007610.4	0.04	0	0	0	0	0	0	0	0.06	0	0	0	0	0	0	0
ENSG00000260086.2	AC007611.1	0.53	1.44	0.99	0.85	2.56	3.39	1.28	1.35	1.06	1.3	1.83	3.81	2.99	2.29	0.14	0.3
ENSG00000262420.3	AC007613.1	0.04	0.08	0.1	0.07	0	0	0.28	0.02	0.12	0.04	0.1	0	0.02	0.02	0.33	0.08
ENSG00000279249.2	AC007614.1	0	0	0	0	0.05	0.25	0.04	0	0.16	0	0	0	0	0	0	0
ENSG00000280189.1	AC007614.2	0.04	0	0.04	0	0.11	0	0	0	0	0	0	0.03	0	0.05	0	0
ENSG00000203648.3	AC007618.1	0	0	0	0	0	0	0	0	0	0	0	0	0	0	0	0
ENSG00000255670.1	AC007619.1	0	0	0	0	0	0	0	0	0	0	0	0.19	0	0	0	0
ENSG00000271370.1	AC007619.2	0	0	0	0	0	0	0	0	0	0	0	0.69	0.38	0	0	0
ENSG00000239255.1	AC007620.1	0	0	0	0	0	0	0	0	0	0	0	0	0	0	0	0
ENSG00000242539.2	AC007620.2	0	0	0	0	0	0	0	0	0.03	0	0	0	0	0	0.54	0
ENSG00000272699.1	AC007620.3	0.18	0	0	0	0	0	0	0	0	0	0	0	0.39	0	0	0
ENSG00000270857.1	AC007621.1	0	0	0	0	0	0	0	0	0	0	0	0	0	0	0	0
ENSG00000240441.1	AC007622.1	0	0	0	0	0	0	0	0	0	0	0	0	0	0	0	0
ENSG00000258136.1	AC007622.2	0.09	0.04	0.28	0.17	0.04	0.2	0.13	0.2	0	0.11	0.86	0.02	0	0	0	0.18
ENSG00000264131.1	AC007631.1	0	0	0	0	0	0	0	0	0	0	0	0	0	0	0	0
ENSG00000256139.2	AC007637.1	0	0	0.14	0	0	0	0	0	0	0	0.12	0	0	0	0.06	0.26
ENSG00000262079.1	AC007638.1	0	0	0	0	0	0	0	0	0	0	0	0	0	0	0	0
ENSG00000263096.1	AC007638.2	0	0	0	0	0	0	0	0	0	0	0	0	0	0	0	0
ENSG00000263680.2	AC007639.1	0	0	0	0	0	0	0	0	0	0	0	0	0	0	0	0
ENSG00000235464.1	AC007652.1	0	0	0	0	0	0	0	0	0	0	0	0	0	0	0	0
ENSG00000256339.1	AC007655.1	0	0	0	0	0	0	0	0	0	0	0	0	0	0	0	0
ENSG00000258131.1	AC007656.1	0	0	0	0	0	0	0	0	0	0	0	0	0.74	0	0	0
ENSG00000279190.1	AC007656.2	0	0	0	0	0	0	0	0	0	0	0	0	0	0	0	0
ENSG00000161132.6	AC007663.1	0	0	0	0	0	0	0	0	0	0	0	0	0	0	0	0
ENSG00000249923.1	AC007663.2	0	0	0	0.06	0	0	0.02	0	0	0	0.02	0	0	0	0	0.09
ENSG00000273139.1	AC007663.3	0.64	0	0	0	0	0.28	0	0	0	0	0	0.57	0	0.79	0.2	0
ENSG00000273343.1	AC007663.4	0	0	0.13	1.09	0.14	0.46	0.11	2.07	0.33	0.14	1.46	0.08	0.25	0.77	0.54	0.8
ENSG00000236754.5	AC007666.1	0	0	0	0	0	0	0	0	0	0	0	0	0	0	0	0
ENSG00000274624.1	AC007671.1	0	0	0	0	0	0	0	0	0	0	0	0	0	0	0	0
ENSG00000267311.1	AC007673.1	0	0	0	0	0	0	0	0	0	0	0	0	0	0	0	0
ENSG00000226297.1	AC007677.1	0	0	0	0	0	0	0	0	0	0	0	0	0	0	0	0
ENSG00000225610.1	AC007679.1	0	0	0	0	0	0	0	0	0	0	0	0	0	0	0	0
ENSG00000237041.1	AC007679.2	0	0	0	0	0	0	0	0	0	0	0	0	0	0	0	0
ENSG00000270571.2	AC007681.1	1.87	2.52	0.85	1.33	1.77	8.56	2.53	7.9	0.34	0.24	0.37	0.13	0.87	0.4	0	0
ENSG00000224415.1	AC007683.1	0	0	0.43	0	0	0	0	0	0	0	0	0.27	0	0	0	0
ENSG00000279482.1	AC007683.2	0	0	0	0	0	0	0	0	0	0	0	0	0	0	0	0
ENSG00000273035.1	AC007684.1	0	1.16	0.22	0	0.25	0	0.41	0	0.37	0.23	0	0.68	0.22	0.93	0	0
ENSG00000182888.5	AC007685.1	0.23	0	0	0	0	0	0	0	0	0	0	0	0	0	0	0
ENSG00000243225.2	AC007686.1	0	0	0	0	0	0	0	0	0	0	0	0	0	0	0.2	0
ENSG00000258473.1	AC007686.2	0	0	0	0	0	0	0	0	0	0	0	0	0	0	0	0
ENSG00000273729.1	AC007686.3	0.03	0.21	0.21	0.08	0.04	0	0.03	0.02	0	0	0.04	0.03	0	0.27	0.26	0.25
ENSG00000285966.1	AC007686.4	0.03	0	0.02	0.09	0.02	0	0	0	0	0.06	0	0	0	0.03	0	0
ENSG00000270178.1	AC007687.1	0.76	0	0	0	0	0	0	0	0	0	0	0	0	0	0	0
ENSG00000241352.3	AC007688.1	0	0	0	0	0	0	0	0	0	0	0	0	0	0	0	0.09
ENSG00000256011.1	AC007688.2	0	0	0	0	0	0	0	0	0	0	0	0	0	0	0	0
ENSG00000233565.1	AC007690.1	0	0	0	0	0	0	0	0	0	0	0	0	0	0	0	0
ENSG00000278256.1	AC007718.1	0	0	0	0	0	0	0	0	0	0	0	0	0	0	0	0
ENSG00000260616.6	AC007728.1	0	0	0	0	0	0	0	0	0	0	0	0	0	0	0	0
ENSG00000261644.2	AC007728.2	0	0	0	0.09	0	0	0	0	0	0.06	0.04	0	0	0	0	0
ENSG00000270120.1	AC007728.3	0	0	0	0	0	0	0	0	0	0	0	0	0	0	0	0
ENSG00000188280.11	AC007731.1	0	0	0	0	0	0	0	0	0	0	0	0	0	0	0	0
ENSG00000215493.3	AC007731.2	0	0	0	0.06	0	0	0	0.16	0	0.04	0	0	0	0.03	0	0
ENSG00000235578.1	AC007731.3	0	0	0	0	0	0	0	0	0	0	0	0	0	0	0	0
ENSG00000236003.1	AC007731.4	0	0	0	0	0	0	0	0	0	0	0	0	0	0	0	0
ENSG00000277971.1	AC007731.5	0	0	0	0	0	0	0	0	0	0	0	0	0	0	0.73	0.55
ENSG00000229087.1	AC007738.1	0	0	0	0	0	0	0	0	0	0	0	0.87	0	0	0	0
ENSG00000280257.1	AC007741.1	0	0	0	0	0	0	0	0	0	0	0	0	0	0	0	0
ENSG00000225896.1	AC007742.1	0	0	0	0	0	0	0	0	0	0	0	0	0	0	0	0
ENSG00000275578.1	AC007742.2	0	0	0	0	0	0	0	0	0	0	0	0	0	0	0	0
ENSG00000233251.7	AC007743.1	4.11	2.7	2.95	4.42	2.44	2.57	2.69	4.02	5.15	5.03	4.65	2.21	7.33	5.73	1.41	2.52
ENSG00000271894.1	AC007744.1	3.5	2.72	2.3	2.04	0.77	1.09	1.04	3.84	2.2	4.85	2.13	0.42	2.67	2.51	1.12	6.7
ENSG00000259855.1	AC007749.1	0	0	0	0	0	0	0	0	0	0	0	0	0	0	0	0
ENSG00000236841.7	AC007750.1	0	0	0.13	0	0	0.04	0.08	0.13	0.01	0.15	0.08	0.04	0.22	0.05	0	0
ENSG00000254644.1	AC007751.1	0	0	0	0	0	0	0	0	0	0	0	0	0	0	0	0
ENSG00000255105.1	AC007751.2	0	0	0	0	0	0	0	0	0	0	0	0.52	0	0	0	0
ENSG00000267213.4	AC007773.1	0	0.34	0.57	0.67	0	0.72	0.06	0.13	0.4	0.07	0.38	0.17	0.19	0.12	1.13	0.6
ENSG00000267009.6	AC007780.1	0	0.12	1.15	0.2	0.32	0.31	0.32	0	1.12	0.21	0.28	0.79	0.1	0.97	0.24	2.07
ENSG00000267922.1	AC007785.1	0	0	0	0	0	0	0	0	0	0	0	0	0	0	0	0
ENSG00000268053.1	AC007785.2	0	0	0	0	0	0	0	0	0	0	0	0	0	0	0	0
ENSG00000268401.1	AC007785.3	0	0	0	0	0	0	0	0	0	0	0	0	0	0	0	0
ENSG00000267498.1	AC007786.1	0.38	0	0	0	0	0	0	0	0	0	0	0	0.1	0	0.18	0.38
ENSG00000276251.1	AC007786.2	0	0	0	0.3	0	0	0	0	0	0	0	0	0	0	0	0
ENSG00000276631.1	AC007786.3	0	0	0	0	0	0	0	0	0	0	0	0	0	0	0	0
ENSG00000267610.2	AC007787.1	0	0	0	0	0	0	0	0	0	0	0	0	0	0	0	0
ENSG00000279044.1	AC007787.2	0	0	0	0	0	0	0	0	0	0	0	0	0	0	0	0
ENSG00000226205.1	AC007790.1	0	0	0.17	0	0	0	0	0.54	0	0	0	0.29	0	0.47	0.15	0.25
ENSG00000280103.1	AC007792.1	0	0	0	0	0	0	0	0	0	0	0	0	0	0	0	0
ENSG00000267617.1	AC007795.1	0	0	0	0	0	0	0	0	0	0	0	0	0	0	0	0
ENSG00000260743.1	AC007823.1	0	0	0.13	0.18	0.04	0.18	0.06	0.07	0.12	0	0.06	0.02	0.07	0.16	0.25	0.1
ENSG00000249094.2	AC007834.1	0	0	0.1	0	0	0	0	0	0	0	0	0	0	0	0	0
ENSG00000256351.1	AC007834.2	0	0	0	0	0	0	0	0	0	0	0	0	0	0	0	0
ENSG00000269069.1	AC007842.1	0	0	0.05	0	0	0.06	0	0	0	0	0.02	0	0.13	0	0	0
ENSG00000284837.1	AC007846.1	0.03	0	0.11	0.08	0.07	0	0.03	0	0.13	0	0.1	0	0	0	0.31	0.22
ENSG00000285471.1	AC007846.2	0	0	0.38	0	0	0	0	0	0	0.17	0	0	0	0	0	0
ENSG00000255983.1	AC007848.1	0	0	0	0	0	0	0	0.04	0	0	0	0	0	0	0	0
ENSG00000256218.1	AC007848.2	0.03	0.12	0.06	0.11	0.03	0.04	0.03	0.16	0.03	0.04	0.03	0.02	0.12	0.03	0.05	0.03
ENSG00000242795.2	AC007849.1	0	0.99	0.19	0	0	0.23	1.22	0.96	0.16	0.81	0.46	0.12	0	0	0	0
ENSG00000244381.1	AC007849.2	0	0	0	0	0	0	0	0	0	0	0	0	0	0	0	0
ENSG00000262950.1	AC007861.1	0	0	0	0	0	0	0	0	0	0	0	0	0	0	0	0
ENSG00000263110.1	AC007861.2	0	0	0	0	0	0	0	0	0	0	0	0	0	0	0	0
ENSG00000254488.1	AC007876.1	0	0	0	0	0	0	0	0	0	0.28	0.11	0	0.13	0	0	0
ENSG00000281195.1	AC007878.1	0.71	0.09	0.23	0.29	0	0.38	0.27	0.34	0	0.23	0.17	0	0.2	0.58	0.24	0.13
ENSG00000224342.1	AC007879.1	0	0	0	0	0	0	0	0	0	0	0	0	0	0	0	0
ENSG00000225916.1	AC007879.2	0	0	0	0	0	0.39	0	0	0	0	0	0	0	0	0	0.14
ENSG00000234902.6	AC007879.3	0	0	0.08	0	0.18	0	0	0	0	0	0	0	0.16	0	0.82	0.14
ENSG00000240440.1	AC007879.4	0	0	0	0	0	0	0	0	0	0	0	0	0	0	0	0
ENSG00000233870.1	AC007881.1	0	0	0	0	0	0	0	0	0	0	0	0	0	0	0	0
ENSG00000236469.1	AC007881.2	0	0	0	0	0	0	0	0	0	0	0	0	0	0	0	0
ENSG00000272735.1	AC007881.3	0	0	0	0	0	0	0	0	0.12	0	0.34	0	0	0	0	0.12
ENSG00000224891.1	AC007899.1	0	0	0	0	0	0	0.09	0	0	0	0	0	0	0.16	0.08	0
ENSG00000261291.1	AC007906.1	0	0	0	0	0	0	0	0	0	0	0	0	0	0	0	0
ENSG00000277639.2	AC007906.2	0.09	0.21	0.09	0.31	0.25	0.68	0.96	0.23	0.62	0.68	0.21	1.98	0.99	0.29	0.45	0.18
ENSG00000259759.1	AC007907.1	0	0	0	0.21	0	0	0	0	0	0	0	0	0	0	0	0
ENSG00000224611.1	AC007919.1	0	0	0	0	0	0	0	0	0	0	0	0	0	0	0	0
ENSG00000231384.1	AC007919.2	0	0	0	0	0	0	0	0	0	0	0	0	0	0	0	0.33
ENSG00000198491.3	AC007920.1	0	0	0	0	0	0	0	0	0	0	0	0	0	0	0	0
ENSG00000283175.1	AC007920.2	0.12	1.08	0.92	0.88	0.03	0	0.02	0.19	0.42	0.16	0.13	0.14	0	0.07	0.17	0.25
ENSG00000264695.1	AC007922.1	0	0	0	0	0	0	0	0	0	0	0	0	0	0	0	0
ENSG00000265094.1	AC007922.2	0	0	0	0	0	0	0	0	0	0	0	0	0	0	0	0
ENSG00000266489.2	AC007922.3	0	0	0	0	0	0	0	0	0	0	0	0	0	0	0	0
ENSG00000263567.1	AC007923.1	0	0	0	0	0	0	0	0	0	0	0	0	0	0	0	0
ENSG00000265863.1	AC007923.2	0	0	0	0	0	0	0	0	0	0	0	0	0	0	0	0
ENSG00000266448.1	AC007923.3	0	0	0	0	0	0	0	0	0	0	0	0	0	0	0	0
ENSG00000266877.1	AC007923.4	0	0	0	0	0	0	0	0	0	0	0	0	0	0	0	0
ENSG00000259920.1	AC007938.1	0	0	0	0	0	0	0	0	0	0	0.06	0	0	0	0	0
ENSG00000270823.1	AC007938.2	0	0.13	0	0.08	0.04	0	0	0	0	0	0	0.03	0	0.14	0.27	0.26
ENSG00000270953.1	AC007938.3	0	0	0.13	0.11	0	0.63	0	0	0.45	0	0.11	0	0.13	0	0.33	1.97
ENSG00000263863.1	AC007948.1	0	0	0	0	0	0	0	0	0	0	0	0	0	0	0	0
ENSG00000259268.1	AC007950.1	0	0	0	0	0	0	0	0	0	0	0	0	0	0	0	0
ENSG00000276651.1	AC007950.2	0	0	0.02	0	0	0	0	0	0	0	0	0	0	0	0	0
ENSG00000197665.7	AC007952.1	0.14	0.22	0.34	0.37	0.19	0.25	0.18	0.13	0.14	0.9	0.95	0.57	0.11	0.11	1.73	0.58
ENSG00000228157.4	AC007952.2	0.21	0.18	0.32	0.66	1.12	0.45	0.51	0.86	1.35	0.43	0.83	1.85	1.37	2.33	0.38	0.34
ENSG00000230197.6	AC007952.3	2.88	1.99	3.23	2.28	1.27	0.22	0.27	1.07	0.71	0.1	0.46	1.28	0.09	0	4.1	0.55
ENSG00000262202.4	AC007952.4	0	0.93	0.12	0.21	0.94	0	0.23	0.13	0.32	0	0.1	0.18	0	0.11	1	0
ENSG00000262292.2	AC007952.5	0.25	0	0.29	0.13	0.25	0	0.3	0.46	0.56	0.25	0.41	0.32	1.17	0.82	0.2	0.14
ENSG00000262319.1	AC007952.6	0.01	0.04	0.04	0.04	0.06	0.09	0.13	0	0	0	0.06	0.01	0	0	0.04	0
ENSG00000263394.1	AC007952.7	1.36	0.25	1.38	1.05	1.89	0.46	1.6	2.87	1.55	0.52	0.7	2.28	2.38	3.35	0.65	0.17
ENSG00000266311.6	AC007952.8	0	0.5	0	0	0	0.22	0	1.07	0.71	0.1	0	0.64	0.09	0	1.02	0.55
ENSG00000266664.1	AC007952.9	0	0	0	0	0	0	0	0	0	0	0	0	0	0	0	0
ENSG00000225790.1	AC007953.1	0	0	0	0	0	0	0	0	0	0	0	0	0	0	0	0
ENSG00000270321.1	AC007953.2	0	0	0	0	0	0	0	0	0	0	0	0	0	0	0	0
ENSG00000258510.2	AC007954.1	0	0	0	0	0	0	0	0	0.17	0	0	0	0	0	0	0
ENSG00000258439.1	AC007956.1	0	0	0	0	0	0	0	0.17	0	0	0.28	0	0	0	0	0.44
ENSG00000226747.6	AC007966.1	0	0	0	0	0	0	0	0	0.09	0	0	0	0	0	0	0
ENSG00000173357.12	AC007967.1	0	0	0	0	0	0	0	0	0	0	0	0	0	0	0	0
ENSG00000228207.1	AC007967.2	0	0	0	0	0	0	0	0	0	0	0	0	0	0	0	0
ENSG00000230025.1	AC007967.3	0	0	0	0	0	0	0	0	0	0	0	0	0	0	0	0
ENSG00000273731.1	AC007967.4	0	0	0	0	0	0	0	0	0	0	0	0	0	0	0	0
ENSG00000233762.3	AC007969.1	0	0.34	0	0.43	0.29	0	0.24	0	0.43	0	0	1.05	0.78	0	0.21	0
ENSG00000234061.1	AC007969.2	0	0	0	0	0	0	0	0	0	0	0	0	0	0	0	0
ENSG00000253790.1	AC007991.1	0	0	0	0	0	0	0	0	0	0	0	0	0	0	0	0
ENSG00000253838.1	AC007991.2	0	0	0	0	0	0	0	0	0	0	0	0	0	0	0	0
ENSG00000253939.1	AC007991.3	0	0	0	0	0	0	0	0	0	0	0	0	0	0	0	0
ENSG00000254287.1	AC007991.4	0	0	0	0	0	0	0	0	0	0	0	0	0	0	0	0
ENSG00000183663.6	AC007992.1	0	0	0	0	0	0	0	0	0	0	0	0	0	0	0	0
ENSG00000271349.1	AC007992.2	0	0	0	0	0	0	0	0	0	0	0	0	0	0	0	0
ENSG00000267166.5	AC007993.1	0	0	0	0.02	0	0	0	0	0	0	0	0	0	0	0	0
ENSG00000267420.1	AC007993.2	0	0	0	0	0	0	0	0	0	0	0	0	0	0	0	0
ENSG00000282199.1	AC007993.3	0	0	0	0	0	0	0	0	0	0	0	0	0	0	0	0
ENSG00000277534.1	AC007996.1	0.5	0.05	0.02	0.11	0.16	0.11	0.05	0.22	0	0.28	0.01	0.25	0.12	0.08	0.03	0.15
ENSG00000239683.1	AC007998.1	0	0	0	0	0	0	0	0	0	0	0	0	0	0	0	0
ENSG00000267140.1	AC007998.2	0.46	0.34	0.52	0	0	0	0	0	1.64	0	1.02	0.68	1.09	0.23	0	0
ENSG00000267583.5	AC007998.3	1.51	0.4	0.74	0	13.9	16.84	31.88	2.5	64.69	44.17	52.35	124.33	64.98	18.07	0.13	0
ENSG00000275512.1	AC007998.4	0.83	1.32	1.1	1.01	0.31	1.39	1.35	2.05	1.05	0.87	1.54	0.88	1.19	1.32	1	1.94
ENSG00000279074.1	AC007998.5	0	0	0	0	0	0	0	0	0	0	0	0	0	0	0	0
ENSG00000256378.1	AC008011.1	0	0	0	0	0	0	0	0	0	0	0	0	0	0	0	0
ENSG00000257042.1	AC008011.2	0	0	0	0	0	0	0	0	0	0	0	0	0	0	0.15	0
ENSG00000285901.1	AC008012.1	1.33	5.2	7.3	2.46	1.44	4.68	5.88	1.87	7.16	2.29	8.01	16.95	5.24	11.45	19.88	2.07
ENSG00000226472.8	AC008013.1	0.14	0	0.16	0.11	0	0	0.14	0.16	0	0	0	0	0.16	0	0	0
ENSG00000256984.2	AC008013.2	0	0	0	0	0	0	0	0	0	0.52	0	0	0	0	0	0
ENSG00000270926.1	AC008013.3	0	0	0	0	0	0	0	0	0	0	0	0	0	0	0	0
ENSG00000257261.5	AC008014.1	0.35	4.03	9.08	2.54	0.54	3.49	0.28	0.5	1.42	1.08	3.96	2.92	0.4	5.05	5.62	1.09
ENSG00000258578.2	AC008015.1	0	0	0	0	0	0	0	0	0	0	0	0	0	0	0	0
ENSG00000239246.3	AC008026.1	0	0	0	0	0	0.3	0	0	0	0	0	0	0	0	0	0
ENSG00000239809.1	AC008026.2	0	0	0	0	0	0	0	0	0	0	0	0	0	0	0	0
ENSG00000264546.1	AC008026.3	0	0	0.12	0	0	0	0	0.1	0	0	0	0	0.03	0	0.17	0.09
ENSG00000256075.1	AC008033.1	0	0	0	0	0	0	0	0	0	0	0	0	0	0	0	0
ENSG00000256917.1	AC008033.2	0	0	0	0	0	0	0	0	0	0	0	0	0	0	0	0
ENSG00000273824.1	AC008033.3	0	0	0	0	0	0	0	0	0.04	0.04	0.03	0.08	0.08	0	0	0
ENSG00000272369.1	AC008035.1	0	0.33	0.52	0.21	0.28	0	0.48	0	0.64	0.27	0.41	1.08	1.49	0	0.43	0.21
ENSG00000283041.1	AC008038.1	0.08	0.5	0.11	0.06	0	0.46	0.35	0	0	0	0.06	1.05	0.14	0	0.06	0.15
ENSG00000239219.2	AC008040.1	0	0	0.01	0	0	0	0.12	0	0	0	0	0.04	0	0	0.05	0.09
ENSG00000242583.1	AC008040.2	0	0	0.1	0	0	0	0	0	0.27	0	0	0	0	0	0	0
ENSG00000244039.1	AC008040.3	0	0	0	0	0	0	0	0	0	0	0	0	0	0	0	0
ENSG00000244193.1	AC008040.4	0	0	0	0	0	0.23	0	0	0	0	0	0	0	0	0	0.08
ENSG00000268220.1	AC008040.5	1.2	3.05	1.37	3.05	1.82	1.69	1.98	4.59	1.96	1.99	1.66	1.2	1.86	4.12	0.84	1.4
ENSG00000259124.1	AC008050.1	0	0	0.25	0	0	0.46	0.69	0	0.76	1.24	0	1.22	0.12	0.44	0	0
ENSG00000257580.1	AC008055.1	0	0	0	0	0	0	0	0	0	0	0	0	0	0	0	0
ENSG00000258637.1	AC008056.1	0	0	0	0	0	0	0	0	0	0	0.84	0	0	0	0	0
ENSG00000259106.1	AC008056.2	0	0	0	0	0	0	0	0	0	0	0	0	0	0	0	0
ENSG00000218672.1	AC008060.1	0	0	0	0	0	0	0	0	0	0	0	0	0	0	0	0
ENSG00000227365.1	AC008060.2	0	0	0	0	0	0	0	0	0	0	0	0	0	0	0	0
ENSG00000236544.1	AC008060.3	0	0	0	0	0	0	0	0	0	0	0	0	0	0	0	0
ENSG00000260426.1	AC008060.4	0	0	0	0	0	0	0	0	0	0	0	0	0	0	0	0
ENSG00000230918.1	AC008063.1	0	0	0	0	0	0	0	0	0	0	0.2	0	0	0	0	0
ENSG00000233397.2	AC008063.2	0	0	0	0	0	0	0	0	0	0	0	0	0	0	0	0
ENSG00000224553.1	AC008065.1	0	0	0	0	0	0	0	0	0	0	0	0	0	0	0	0
ENSG00000253793.1	AC008066.1	0	0	0	0	0	0	0	0	0	0	0	0	0	0.07	0	0.07
ENSG00000237031.7	AC008067.1	0	0	0	0	0	0	0	0	0	0	0	0	0	0	0	0
ENSG00000224604.1	AC008069.1	0	0	0	0	0	0	0	0	0	0	0	0	0	0	0	0
ENSG00000228681.1	AC008072.1	0	0	0	0	0	0	0	0	0	0	0	0	0	0	0	0
ENSG00000223754.1	AC008073.1	0	0	0	0	0	0	0	0	0.14	0	0	0	0	0	0	0
ENSG00000232642.1	AC008073.2	0	0	0	0	0	0	0	0	0	0	0	0	0	0	0	0
ENSG00000276087.2	AC008073.3	0.05	0.04	0	0.16	0.19	0	0.09	0.02	0	0	0	0.02	0.05	0	0.02	0
ENSG00000237217.1	AC008074.1	0	0	0	0	0	0	0	0	0	0	0	0	0	0	0	0
ENSG00000260101.1	AC008074.2	0.81	0.22	0.9	0.07	0	0.1	0.29	0.08	1	1.47	0.63	0.71	1.05	1.18	0.02	0.21
ENSG00000280007.1	AC008079.1	0.03	0.03	0.04	0.02	0.02	0.03	0.02	0.03	0.03	0.01	0.03	0.08	0.03	0.03	0.03	0.03
ENSG00000173862.3	AC008080.1	0	0	0.22	0.1	0	0	0	0	0	0	0	0	0	0	0	0
ENSG00000227481.1	AC008080.2	0	0	0	0	0	0	0	0	0	0	0.24	0	0.15	0	0	0
ENSG00000233219.1	AC008080.3	0	0	0	0	0	0	0	0	0	0	0	0	0	0	0	0
ENSG00000236494.1	AC008080.4	0	0	0.03	0	0	0	0	0	0	0	0	0	0	0	0	0
ENSG00000257925.1	AC008083.1	0	0	0	0	0.39	0	0	0	0	0	0	0	0	0	0.2	0
ENSG00000258181.1	AC008083.2	0	0	0	0	0	0	0	0	0	0	0	0	0	0.9	0	0
ENSG00000276454.1	AC008083.3	0	0	0	0	0	0	0	0	0	0	0	0	0	0.87	0	0
ENSG00000266839.3	AC008088.1	0	0	0	0	0	0	0	0	0	0	0	0	0	0	0	2.43
ENSG00000279987.1	AC008103.1	0	0	0	0	0	0	0	0	0	0	0	0	0	0	0	0
ENSG00000233175.2	AC008105.1	0	0	0	0	0	0	0	0	0	0	0	0	0	0	0	0
ENSG00000233483.3	AC008105.2	0	0.47	0	0	0	0	0	0	0	0	0	0.21	0.15	0	0	0
ENSG00000267121.5	AC008105.3	0	0.07	0	0	0	0	0.09	0	0.05	0.19	0.16	0	0	0.15	0	0.22
ENSG00000266602.1	AC008109.1	0	0	0	0	0	0	0	0	0	0	0	0	0	0	0	0
ENSG00000255649.1	AC008114.1	0	0	0	0	0	0	0	0	0	0	0	0	0	0	0	0
ENSG00000256658.1	AC008115.1	0	0	0	0	0	0	0	0	0	0	0	0	0	0	0	0
ENSG00000257004.1	AC008115.2	0	0	0	0	0	0	0	0	0	0	0	0	0	0	0	0
ENSG00000275560.1	AC008115.3	0	0	0	0.28	0	0	0	0.84	0.14	0	0.4	0.1	0	0	0	0.29
ENSG00000275963.1	AC008115.4	0	0	0	0	0	0	0	0	0	0	0	0	0	0	0	0
ENSG00000271596.1	AC008121.1	0	0	0	0	0	0	0	0	0	0	0	0	0	0	0	0
ENSG00000274156.1	AC008121.2	0	0	0	0	0	0	0	0	0	0	0	0.45	0	0	0	0
ENSG00000274797.1	AC008121.3	0	0	0	0	0	0	0.26	0	0	0	0	0	0.54	0.46	0	0
ENSG00000273015.2	AC008124.1	3.04	3.21	3.44	3.23	2.63	3.31	2.48	3.24	2.35	2.73	2.35	1.38	2.66	2.5	1.72	1.55
ENSG00000257958.1	AC008125.1	0	0	0	0	0	0	0	0	0	0	0	0	0	0	0	0
ENSG00000258204.1	AC008126.1	0	0	0	0	0	0	0	0	0	0	0	0	0	0	0	0
ENSG00000257319.1	AC008127.1	0	0	0	0	0	0	0	0	0	0	0	0	0	0	0	0
ENSG00000257572.1	AC008127.2	0	0	0	0	0	0	0.1	0	0	0	0	0	0	0.05	0	0
ENSG00000161103.11	AC008132.1	0	0	0	0	0	0	0	0	0	0	0	0	0	0	0.01	0.02
ENSG00000239989.1	AC008132.2	0	0	0	0	0	0	0	0	0	0	0	0	0	0	0	0
ENSG00000266535.1	AC008133.1	0	0	0	0	0	0	0	0	0	0	0	0	0	0	0	0
ENSG00000280349.1	AC008133.2	0	0	0	0	0	0	0	0	0	0	0	0	0	0	0	0
ENSG00000234594.1	AC008134.1	0	0	0	0	0	0	0	0	0	0	0	0	0	0	0	0
ENSG00000257256.1	AC008147.1	0	0	0	0	0	0	0	0	0	0	0	0	0	0	0	0
ENSG00000257298.1	AC008147.2	0.04	0	0.03	0.01	0	0.01	0	0.01	0.02	0	0.02	0.01	0	0	0	0.05
ENSG00000257531.2	AC008147.3	0	0	0	0	0	0	0	0	0	0	0	0	0	0	0	0
ENSG00000278842.1	AC008147.4	0	0	0	0	0	0	0	0	0	0	0	0	0	0	0	0
ENSG00000258177.1	AC008149.1	0.93	1.55	0.39	1.79	2.49	2.16	0.52	3.83	1.61	2.2	0.94	2.59	1.98	4.19	0.86	2.14
ENSG00000229177.1	AC008154.1	0	0	0	0	0	0	0	0	0	0	0	0	0	0	0	0
ENSG00000231098.1	AC008154.2	0	0	0	0	0	0	0	0	0	0	0	0	0	0	0	0
ENSG00000213237.4	AC008155.1	1.71	1.62	4.64	4.01	0.68	5.5	7.26	0.63	2.94	1.84	2.85	4.1	1.77	0.48	0.49	1.4
ENSG00000213238.6	AC008155.2	0	0	0	0	0	0	0	0	0	0	0	0	0	0	0	0
ENSG00000271346.1	AC008162.1	0	0	0	0	0	0	0	0	0	0	0	0	0	0	0	0
ENSG00000278646.1	AC008162.2	0	0	0	0	0	0	0	0	0	0	0	0	0	0	0	0
ENSG00000233491.8	AC008163.1	0	0	0	0	0	0	0	0	0	0	0.12	0	0	0	0	0
ENSG00000223536.5	AC008164.1	0	0	0	0	0	0	0	0	0	0	0	0	0	0	0	0
ENSG00000285754.1	AC008170.1	0	0	0	0	0	0	0	0.4	0	0	0	0.01	0	0	0	0
ENSG00000223890.1	AC008171.1	0	0	0	0	0	0	0	0	0	0	0	0	0	0	0	0
ENSG00000235059.5	AC008175.1	0	0	0	0	0	0	0	0	0	0	0	0	0	0	0	0
ENSG00000273589.1	AC008175.2	0	0	0	0	0	0	0	0	0	0	0	0	0	0	0	0
ENSG00000251175.5	AC008243.1	0	0	0	0	0	0	0	0	0	0	0	0	0	0	0	0
ENSG00000257022.1	AC008250.1	0	0	0	0	0	0	0	0	0	0	0	0	0	0	0	0
ENSG00000275567.1	AC008250.2	0	0	0	0	0	0	0	0	0	0	0	0	0	0	0	0
ENSG00000224545.1	AC008264.1	0	0	0	0	0	0	0	0	0	0	0	0	0	0.35	0	0
[truncated: 56,722 more rows]
