# Supplementary material for: Wnt signaling mediates acquisition of blood–brain barrier properties in naïve endothelium derived from human pluripotent stem cells
Source: eLife. 2021 Nov 10;10:e70992. doi: 10.7554/eLife.70992 (PMC8664294; doi:10.7554/eLife.70992)
Supplement: Supplementary file 2. — (A–C) DESeq2-derived average expression (baseMean), log2(fold change), Wald statistic, p-value (Wald test), and adjusted p-value (Benjamini–Hochberg correction) are shown. (A) Passage 1 CHIR-treated ECs versus Passage 1 DMSO-treated ECs. (B) Passage 3 CHIR-treated ECs versus Passage 3 DMSO-treated ECs. (C) Passage 3 DMSO-treated ECs versus Passage 1 DMSO-treated ECs. (D) Lists of upregulated and downregulated genes comprising the intersection of the comparisons in (A) and (B), used to generate Venn diagram in Figure 7E. [file elife-70992-supp2.xlsx]

## Sheet: (A) p1CHIR_p1DMSO
geneid	genename	baseMean	log2FoldChange	lfcSE	stat	pvalue	padj
ENSG00000137834.14	SMAD6	4536.48	-4.24687	0.155657	-27.2835	6.66452e-164	1.17009e-159
ENSG00000169116.11	PARM1	874.244	-4.3442	0.214711	-20.2327	5.04248e-91	4.42654e-87
ENSG00000117394.21	SLC2A1	26399	3.63455	0.18327	19.8317	1.58637e-87	9.28396e-84
ENSG00000113083.13	LOX	2229.83	-6.47024	0.338297	-19.1259	1.53568e-81	6.74048e-78
ENSG00000185885.15	IFITM1	502.956	-4.75974	0.249269	-19.0948	2.79103e-81	9.80041e-78
ENSG00000149591.16	TAGLN	996.622	-4.88948	0.258392	-18.9227	7.41313e-80	2.16921e-76
ENSG00000078725.12	BRINP1	1217.59	-3.71236	0.19904	-18.6513	1.23182e-77	3.08957e-74
ENSG00000133636.10	NTS	787	5.85409	0.323123	18.1172	2.33202e-73	5.11792e-70
ENSG00000128641.18	MYO1B	6296.37	2.20451	0.131435	16.7726	3.87411e-63	7.55753e-60
ENSG00000168646.12	AXIN2	764.882	3.61098	0.219477	16.4526	8.02926e-61	1.4097e-57
ENSG00000110002.15	VWA5A	3179.68	-1.96219	0.121519	-16.1472	1.18911e-58	1.89794e-55
ENSG00000104415.14	WISP1	599.681	-6.38796	0.402495	-15.8709	1.00765e-56	1.47428e-53
ENSG00000134323.11	MYCN	1650.35	-3.66698	0.238466	-15.3774	2.32195e-53	3.13588e-50
ENSG00000106484.15	MEST	12322.7	-3.97761	0.266386	-14.9318	2.04814e-50	2.56852e-47
ENSG00000170801.9	HTRA3	5880.37	-2.38559	0.166573	-14.3216	1.6043e-46	1.87778e-43
ENSG00000068615.18	REEP1	592.287	4.10347	0.287896	14.2533	4.27647e-46	4.69262e-43
ENSG00000000971.15	CFH	368.12	-6.4567	0.455429	-14.1772	1.2684e-45	1.30995e-42
ENSG00000104998.3	IL27RA	361.158	-3.49352	0.251495	-13.891	7.18112e-44	7.00438e-41
ENSG00000145147.19	SLIT2	2739.4	-2.80458	0.202806	-13.8289	1.70599e-43	1.57643e-40
ENSG00000127241.16	MASP1	2641.59	-3.74559	0.271396	-13.8012	2.50567e-43	2.1996e-40
ENSG00000090006.17	LTBP4	5339.08	-3.97656	0.288828	-13.7679	3.97421e-43	3.32263e-40
ENSG00000118785.13	SPP1	341.712	-4.78398	0.351477	-13.6111	3.44025e-42	2.74548e-39
ENSG00000166949.15	SMAD3	1480.08	-1.9608	0.144715	-13.5494	7.98914e-42	6.09849e-39
ENSG00000112715.21	VEGFA	588.043	-3.52512	0.261477	-13.4816	2.00756e-41	1.46861e-38
ENSG00000169851.15	PCDH7	799.24	-3.12718	0.232109	-13.4729	2.25782e-41	1.58563e-38
ENSG00000139289.13	PHLDA1	15584.4	1.86514	0.138953	13.4228	4.44502e-41	3.00159e-38
ENSG00000105974.11	CAV1	10221.7	2.69288	0.20132	13.3761	8.3386e-41	5.42225e-38
ENSG00000100060.17	MFNG	15137.3	2.14672	0.161275	13.3109	1.99949e-40	1.25375e-37
ENSG00000136859.9	ANGPTL2	2966.93	-1.93489	0.145907	-13.2611	3.89187e-40	2.35619e-37
ENSG00000196549.10	MME	1071.09	-3.66798	0.27781	-13.2032	8.41153e-40	4.9227e-37
ENSG00000143127.12	ITGA10	1071.16	-4.13079	0.314355	-13.1405	1.92921e-39	1.09262e-36
ENSG00000115252.18	PDE1A	271.943	4.27226	0.327605	13.0409	7.15929e-39	3.92799e-36
ENSG00000139329.4	LUM	1376.17	-3.81438	0.292608	-13.0358	7.65893e-39	4.07478e-36
ENSG00000205978.5	NYNRIN	1636.09	-3.19977	0.246682	-12.9712	1.78114e-38	9.1975e-36
ENSG00000003096.14	KLHL13	1711.16	-3.07295	0.239138	-12.8501	8.58808e-38	4.30803e-35
ENSG00000168077.13	SCARA3	311.19	-2.79272	0.218298	-12.7932	1.79034e-37	8.73137e-35
ENSG00000169439.11	SDC2	1146.97	-2.69374	0.211697	-12.7245	4.32129e-37	2.05051e-34
ENSG00000135547.8	HEY2	4623.17	-3.25919	0.256592	-12.7018	5.77833e-37	2.66974e-34
ENSG00000120256.10	LRP11	746.919	-2.59522	0.207777	-12.4904	8.41891e-36	3.79002e-33
ENSG00000196611.4	MMP1	8396.78	3.22278	0.261181	12.3393	5.56483e-35	2.44254e-32
ENSG00000183876.8	ARSI	292.716	-5.0495	0.411414	-12.2735	1.25682e-34	5.38194e-32
ENSG00000091986.15	CCDC80	959.78	-2.88915	0.236041	-12.24	1.89917e-34	7.93897e-32
ENSG00000130066.16	SAT1	6440.98	2.64118	0.215834	12.2371	1.96912e-34	8.03997e-32
ENSG00000163050.16	COQ8A	553.308	-2.21214	0.180882	-12.2298	2.1556e-34	8.60134e-32
ENSG00000163520.13	FBLN2	337.902	-5.92571	0.488274	-12.136	6.80465e-34	2.65487e-31
ENSG00000157168.18	NRG1	575.807	-2.68755	0.221659	-12.1247	7.81209e-34	2.98167e-31
ENSG00000142611.16	PRDM16	504.511	-3.90407	0.323589	-12.0649	1.61852e-33	6.04603e-31
ENSG00000115604.10	IL18R1	1514.66	-2.7075	0.224799	-12.0441	2.083e-33	7.61902e-31
ENSG00000116285.12	ERRFI1	1970.05	-2.03234	0.169045	-12.0225	2.70617e-33	9.69637e-31
ENSG00000164619.9	BMPER	3575.9	-3.87155	0.324994	-11.9127	1.01652e-32	3.56943e-30
ENSG00000198535.5	C2CD4A	954.855	-4.15006	0.349215	-11.884	1.43403e-32	4.90851e-30
ENSG00000223953.5	C1QTNF5	472.897	-3.31507	0.27898	-11.8828	1.45379e-32	4.90851e-30
ENSG00000164120.13	HPGD	270.811	3.26189	0.274735	11.8729	1.63721e-32	5.4235e-30
ENSG00000183421.11	RIPK4	389.54	-3.12676	0.263784	-11.8535	2.06467e-32	6.71285e-30
ENSG00000115085.13	ZAP70	326.736	4.776	0.403184	11.8457	2.26538e-32	7.11515e-30
ENSG00000155254.12	MARVELD1	1252.34	-2.27926	0.192415	-11.8455	2.26946e-32	7.11515e-30
ENSG00000013588.8	GPRC5A	338.914	-4.40397	0.375473	-11.7291	9.03844e-32	2.784e-29
ENSG00000184344.3	GDF3	584.244	-2.59097	0.22099	-11.7244	9.55956e-32	2.89374e-29
ENSG00000137463.4	MGARP	123.071	-6.22658	0.531581	-11.7133	1.08925e-31	3.24135e-29
ENSG00000138678.10	GPAT3	682.701	-3.05623	0.260998	-11.7098	1.13598e-31	3.32408e-29
ENSG00000261269.1	AC093278.2	269.036	2.67853	0.23004	11.6438	2.4685e-31	7.10482e-29
ENSG00000106236.3	NPTX2	426.371	-2.23422	0.19296	-11.5787	5.28403e-31	1.49632e-28
ENSG00000182168.14	UNC5C	705.62	-2.48022	0.215407	-11.5141	1.12029e-30	3.12206e-28
ENSG00000164023.14	SGMS2	233.801	-3.94513	0.345878	-11.4061	3.89684e-30	1.06901e-27
ENSG00000171724.2	VAT1L	473.497	-4.17672	0.367073	-11.3784	5.3546e-30	1.44632e-27
ENSG00000101665.9	SMAD7	523.466	-3.0351	0.267335	-11.3532	7.15192e-30	1.90252e-27
ENSG00000108622.10	ICAM2	9420.1	2.03325	0.179766	11.3105	1.16396e-29	3.0501e-27
ENSG00000001461.16	NIPAL3	818.956	-1.73858	0.153909	-11.2961	1.3713e-29	3.54059e-27
ENSG00000091428.17	RAPGEF4	466.977	3.57966	0.317154	11.2868	1.52467e-29	3.8795e-27
ENSG00000041982.15	TNC	2101.81	-3.8755	0.343539	-11.2811	1.62648e-29	4.07945e-27
ENSG00000169515.6	CCDC8	288.004	-3.6053	0.319957	-11.2681	1.88636e-29	4.66462e-27
ENSG00000134470.20	IL15RA	210.415	-3.10416	0.275587	-11.2638	1.98052e-29	4.82943e-27
ENSG00000241186.9	TDGF1	355.489	2.66369	0.237973	11.1932	4.40021e-29	1.05828e-26
ENSG00000137501.17	SYTL2	1711.17	-3.59674	0.321672	-11.1814	5.02959e-29	1.1933e-26
ENSG00000056972.18	TRAF3IP2	510.602	2.4705	0.220994	11.1791	5.16373e-29	1.2088e-26
ENSG00000157613.10	CREB3L1	508.117	-3.37696	0.302324	-11.17	5.71874e-29	1.3211e-26
ENSG00000170323.8	FABP4	345.857	-2.60015	0.233158	-11.1519	7.01123e-29	1.59865e-26
ENSG00000180340.6	FZD2	251.987	-4.91447	0.441234	-11.138	8.19217e-29	1.84397e-26
ENSG00000140416.20	TPM1	7383.58	-1.90667	0.171598	-11.1113	1.10573e-28	2.45738e-26
ENSG00000157927.16	RADIL	584.732	-3.84138	0.347897	-11.0417	2.40371e-28	5.27524e-26
ENSG00000049323.15	LTBP1	3072.58	-1.5786	0.143028	-11.037	2.53353e-28	5.49149e-26
ENSG00000140511.11	HAPLN3	2588.96	-1.79753	0.163387	-11.0017	3.74964e-28	8.02835e-26
ENSG00000101335.9	MYL9	803.188	-3.95993	0.360745	-10.9771	4.92399e-28	1.04157e-25
ENSG00000156113.22	KCNMA1	412.43	-3.81174	0.348829	-10.9272	8.53976e-28	1.78491e-25
ENSG00000151468.10	CCDC3	399.473	-3.50904	0.32193	-10.9	1.15256e-27	2.38065e-25
ENSG00000133466.13	C1QTNF6	3343.5	-1.91296	0.176373	-10.8461	2.08058e-27	4.24752e-25
ENSG00000170345.9	FOS	3954.63	-2.91682	0.269079	-10.84	2.22406e-27	4.48826e-25
ENSG00000105655.18	ISYNA1	2494.73	-1.67223	0.154458	-10.8264	2.58138e-27	5.15015e-25
ENSG00000154856.12	APCDD1	5725.98	5.6913	0.530807	10.722	8.02768e-27	1.58362e-24
ENSG00000168497.4	CAVIN2	8351.13	2.41433	0.226002	10.6828	1.22559e-26	2.39085e-24
ENSG00000183454.16	GRIN2A	214.097	-3.97168	0.373628	-10.63	2.16077e-26	4.16886e-24
ENSG00000102802.9	MEDAG	330.367	-3.34992	0.315883	-10.6049	2.82641e-26	5.39384e-24
ENSG00000166741.7	NNMT	794.65	-3.62326	0.341992	-10.5946	3.15744e-26	5.96077e-24
ENSG00000176978.13	DPP7	859.216	-2.44032	0.231171	-10.5563	4.74898e-26	8.86999e-24
ENSG00000145911.5	N4BP3	1648.83	3.02218	0.287134	10.5253	6.60241e-26	1.22019e-23
ENSG00000147113.16	CXorf36	17082	2.10867	0.200812	10.5007	8.56989e-26	1.56731e-23
ENSG00000115844.10	DLX2	126.573	-4.68989	0.447409	-10.4823	1.04159e-25	1.88528e-23
ENSG00000130830.14	MPP1	2423.72	1.77686	0.169793	10.4648	1.25315e-25	2.24505e-23
ENSG00000144619.14	CNTN4	220.889	-5.0787	0.485926	-10.4516	1.44099e-25	2.55549e-23
ENSG00000182179.12	UBA7	416.248	-3.01408	0.288444	-10.4495	1.47373e-25	2.58743e-23
ENSG00000164116.16	GUCY1A1	294.62	-2.80572	0.270064	-10.3891	2.78035e-25	4.83313e-23
ENSG00000178175.11	ZNF366	1039.98	2.14201	0.208807	10.2583	1.08595e-24	1.86921e-22
ENSG00000122861.15	PLAU	1547.07	-1.9161	0.187131	-10.2393	1.32157e-24	2.25269e-22
ENSG00000164161.9	HHIP	176.877	-5.64276	0.551948	-10.2233	1.55861e-24	2.6312e-22
ENSG00000135480.15	KRT7	240.987	-9.83614	0.962783	-10.2164	1.67516e-24	2.80103e-22
ENSG00000075213.10	SEMA3A	340.564	-3.344	0.32743	-10.2129	1.73617e-24	2.87566e-22
ENSG00000104081.13	BMF	579.914	-1.77574	0.174109	-10.199	2.00364e-24	3.28765e-22
ENSG00000160932.10	LY6E	941.272	-2.60595	0.256227	-10.1705	2.68636e-24	4.36707e-22
ENSG00000115008.5	IL1A	914.7	2.46444	0.24264	10.1568	3.09094e-24	4.97868e-22
ENSG00000168056.15	LTBP3	447.909	-4.11057	0.405385	-10.1399	3.67447e-24	5.86478e-22
ENSG00000087303.17	NID2	7305.73	2.1493	0.212078	10.1345	3.88447e-24	6.14411e-22
ENSG00000057704.12	TMCC3	7372.81	-1.9558	0.19309	-10.1289	4.11079e-24	6.44404e-22
ENSG00000115738.9	ID2	1161.63	-2.4166	0.241103	-10.0231	1.2066e-23	1.87472e-21
ENSG00000150625.16	GPM6A	326.192	4.02713	0.402155	10.0139	1.32467e-23	2.0401e-21
ENSG00000183098.10	GPC6	1149.43	-2.38684	0.240762	-9.9137	3.62953e-23	5.51984e-21
ENSG00000061337.15	LZTS1	196.453	-3.54556	0.35766	-9.91322	3.64699e-23	5.51984e-21
ENSG00000129038.15	LOXL1	1147.65	-2.71824	0.274603	-9.89881	4.21247e-23	6.32123e-21
ENSG00000111817.17	DSE	886.514	-2.11866	0.214616	-9.87187	5.51268e-23	8.20221e-21
ENSG00000137642.12	SORL1	834.68	-2.66419	0.269981	-9.86805	5.72655e-23	8.44883e-21
ENSG00000141736.13	ERBB2	390.123	-2.90251	0.296175	-9.79999	1.12595e-22	1.64736e-20
ENSG00000196329.11	GIMAP5	2961.31	3.08095	0.3162	9.74368	1.96317e-22	2.84854e-20
ENSG00000123384.13	LRP1	171.575	-3.51644	0.361387	-9.73038	2.23747e-22	3.21994e-20
ENSG00000150593.17	PDCD4	7847.65	-1.53813	0.158477	-9.70572	2.85052e-22	4.06883e-20
ENSG00000139278.9	GLIPR1	340.997	-3.98507	0.411068	-9.69442	3.18455e-22	4.50896e-20
ENSG00000065717.14	TLE2	284.228	-2.54853	0.262926	-9.69294	3.23081e-22	4.53787e-20
ENSG00000172349.17	IL16	2765.04	1.87883	0.19477	9.64637	5.09258e-22	7.09607e-20
ENSG00000141448.8	GATA6	2689.76	-1.93565	0.20142	-9.61002	7.25323e-22	1.00272e-19
ENSG00000128602.9	SMO	325.517	-2.0395	0.213162	-9.56781	1.09195e-21	1.49776e-19
ENSG00000125398.6	SOX9	190.754	-4.89819	0.512692	-9.55387	1.24945e-21	1.70051e-19
ENSG00000135409.10	AMHR2	174.157	-6.34391	0.664089	-9.5528	1.26238e-21	1.70489e-19
ENSG00000174938.14	SEZ6L2	297.766	-3.18528	0.333557	-9.54943	1.30416e-21	1.74787e-19
ENSG00000283632.2	EXOC3L2	9199.8	-2.35285	0.246667	-9.53855	1.44843e-21	1.92652e-19
ENSG00000010671.15	BTK	238.101	-4.9971	0.528646	-9.45265	3.30368e-21	4.3611e-19
ENSG00000108840.15	HDAC5	1501.58	-2.00234	0.212252	-9.43379	3.95525e-21	5.18226e-19
ENSG00000109906.13	ZBTB16	659.85	-2.98214	0.316736	-9.41523	4.72069e-21	6.13935e-19
ENSG00000227507.2	LTB	151.573	3.59075	0.382116	9.39702	5.61314e-21	7.24632e-19
ENSG00000100490.9	CDKL1	389.169	1.90857	0.203982	9.35659	8.23503e-21	1.05535e-18
ENSG00000125968.8	ID1	7025.76	-2.33554	0.249881	-9.34661	9.04994e-21	1.15138e-18
ENSG00000116133.12	DHCR24	27018.7	1.24896	0.134377	9.29448	1.47921e-20	1.86838e-18
ENSG00000173391.8	OLR1	113.777	-10.1385	1.09528	-9.2565	2.11244e-20	2.64915e-18
ENSG00000169432.15	SCN9A	892.054	2.51397	0.271901	9.24589	2.33288e-20	2.90486e-18
ENSG00000103257.8	SLC7A5	1479.43	-2.99501	0.325553	-9.19978	3.58683e-20	4.43478e-18
ENSG00000158246.7	TENT5B	2167.87	-2.21671	0.241004	-9.1978	3.65342e-20	4.48553e-18
ENSG00000154016.13	GRAP	3029.29	1.66773	0.182016	9.16256	5.06786e-20	6.17891e-18
ENSG00000172602.10	RND1	1152.2	-2.13522	0.233132	-9.15884	5.24579e-20	6.35174e-18
ENSG00000224383.7	PRR29	935.59	2.29109	0.250615	9.14187	6.13801e-20	7.33096e-18
ENSG00000198910.13	L1CAM	105.487	-7.44374	0.814203	-9.14236	6.11019e-20	7.33096e-18
ENSG00000136574.17	GATA4	110.342	-4.93555	0.539957	-9.14064	6.20844e-20	7.36497e-18
ENSG00000143507.17	DUSP10	468.354	-2.00144	0.219233	-9.12927	6.89638e-20	8.12616e-18
ENSG00000139112.10	GABARAPL1	1803.06	-1.29991	0.14279	-9.10363	8.73591e-20	1.02251e-17
ENSG00000139211.6	AMIGO2	1252.64	-1.5553	0.171183	-9.08559	1.03134e-19	1.19915e-17
ENSG00000179348.11	GATA2	1597.18	-1.52579	0.168569	-9.05141	1.41135e-19	1.6302e-17
ENSG00000154529.14	CNTNAP3B	953.962	1.95779	0.21659	9.03917	1.57866e-19	1.81153e-17
ENSG00000153823.18	PID1	104.209	-9.97371	1.10393	-9.03473	1.64408e-19	1.87435e-17
ENSG00000079215.13	SLC1A3	479.697	-3.24352	0.359079	-9.03287	1.67231e-19	1.89424e-17
ENSG00000178235.7	SLITRK1	104.983	-3.47747	0.385598	-9.01839	1.90878e-19	2.14823e-17
ENSG00000162873.14	KLHDC8A	112.105	-5.18475	0.575957	-9.00198	2.21684e-19	2.47905e-17
ENSG00000119866.21	BCL11A	283.81	-2.59566	0.288917	-8.98409	2.60891e-19	2.89902e-17
ENSG00000184584.12	TMEM173	438.442	-1.99858	0.22268	-8.97511	2.83077e-19	3.12578e-17
ENSG00000182197.11	EXT1	1900.43	-1.60498	0.179148	-8.95899	3.27654e-19	3.57306e-17
ENSG00000185483.11	ROR1	803.238	-1.54253	0.172176	-8.95905	3.27501e-19	3.57306e-17
ENSG00000144681.10	STAC	157.331	2.8936	0.323078	8.95632	3.35681e-19	3.63799e-17
ENSG00000130176.7	CNN1	162.355	-5.59936	0.625546	-8.95116	3.51752e-19	3.78878e-17
ENSG00000176697.18	BDNF	185.771	-4.08608	0.456723	-8.94653	3.66846e-19	3.92727e-17
ENSG00000123572.16	NRK	248.571	-3.66174	0.409819	-8.93503	4.07078e-19	4.33156e-17
ENSG00000082458.11	DLG3	141.319	-4.05614	0.454779	-8.91894	4.70777e-19	4.97917e-17
ENSG00000106069.22	CHN2	153.79	3.31768	0.373006	8.89444	5.87122e-19	6.1422e-17
ENSG00000073849.14	ST6GAL1	18155	-2.25387	0.253406	-8.89433	5.87737e-19	6.1422e-17
ENSG00000155760.2	FZD7	206.207	-4.07834	0.459141	-8.88255	6.53443e-19	6.78846e-17
ENSG00000095713.13	CRTAC1	117.567	-4.46093	0.502979	-8.86901	7.37987e-19	7.62167e-17
ENSG00000140092.14	FBLN5	90.8814	-7.51181	0.852455	-8.81197	1.22968e-18	1.26254e-16
ENSG00000134853.11	PDGFRA	423.214	-7.55688	0.858636	-8.80103	1.35566e-18	1.3838e-16
ENSG00000112414.14	ADGRG6	6523.29	-5.31606	0.604557	-8.79331	1.45216e-18	1.47374e-16
ENSG00000132376.19	INPP5K	1750.52	-1.23831	0.140835	-8.79264	1.46084e-18	1.47402e-16
ENSG00000166073.10	GPR176	274.765	-2.70189	0.307561	-8.78488	1.56533e-18	1.57043e-16
ENSG00000164574.15	GALNT10	2872.74	-1.68744	0.192631	-8.75997	1.95308e-18	1.94831e-16
ENSG00000141526.16	SLC16A3	477.834	-2.73431	0.312758	-8.7426	2.2781e-18	2.2597e-16
ENSG00000119326.14	CTNNAL1	4972.58	-2.03488	0.232978	-8.73421	2.45366e-18	2.42016e-16
ENSG00000131831.17	RAI2	336.504	-2.63605	0.301912	-8.73119	2.52013e-18	2.47184e-16
ENSG00000166033.12	HTRA1	3288.43	-2.56984	0.294836	-8.71615	2.87811e-18	2.80728e-16
ENSG00000173083.14	HPSE	229.206	-3.09813	0.355782	-8.70795	3.0942e-18	3.00137e-16
ENSG00000198873.11	GRK5	1768.54	1.50984	0.173795	8.68747	3.70599e-18	3.57506e-16
ENSG00000138496.16	PARP9	341.592	-1.75857	0.202479	-8.68518	3.7814e-18	3.62787e-16
ENSG00000100968.13	NFATC4	124.297	-3.46471	0.399461	-8.67346	4.19188e-18	3.99983e-16
ENSG00000105971.14	CAV2	3548.27	1.42496	0.16474	8.64975	5.16106e-18	4.87979e-16
ENSG00000074181.8	NOTCH3	3113.04	-1.44746	0.167345	-8.64956	5.16968e-18	4.87979e-16
ENSG00000282851.2	BISPR	265.403	-2.66695	0.308683	-8.63976	5.63311e-18	5.2888e-16
ENSG00000262655.3	SPON1	2244.71	-1.93047	0.223576	-8.6345	5.89853e-18	5.50853e-16
ENSG00000129538.13	RNASE1	9973.14	1.08213	0.125582	8.61688	6.88003e-18	6.39114e-16
ENSG00000164683.16	HEY1	12284.6	-1.27641	0.148398	-8.60128	7.8835e-18	7.24663e-16
ENSG00000198947.15	DMD	299.378	-2.40856	0.280014	-8.60156	7.8643e-18	7.24663e-16
ENSG00000156299.13	TIAM1	3192.53	1.5211	0.177149	8.58656	8.96083e-18	8.19402e-16
ENSG00000198756.11	COLGALT2	536.646	-2.13859	0.249482	-8.57212	1.01596e-17	9.24209e-16
ENSG00000100739.10	BDKRB1	116.809	-8.44467	0.987765	-8.54928	1.23864e-17	1.12097e-15
ENSG00000228592.1	D21S2088E	389.622	2.62545	0.307647	8.534	1.41377e-17	1.2729e-15
ENSG00000166780.10	C16orf45	1978.54	1.12835	0.132493	8.51629	1.64745e-17	1.47573e-15
ENSG00000019549.11	SNAI2	1103.66	-2.62415	0.30821	-8.51413	1.67841e-17	1.49583e-15
ENSG00000105612.8	DNASE2	410.636	-1.964	0.230756	-8.51114	1.72231e-17	1.5272e-15
ENSG00000109072.13	VTN	94.6127	-6.10268	0.717398	-8.50668	1.78983e-17	1.5791e-15
ENSG00000153132.12	CLGN	402.468	2.08283	0.245165	8.49563	1.96865e-17	1.72818e-15
ENSG00000116157.5	GPX7	706.247	-1.83367	0.216705	-8.4616	2.63734e-17	2.30367e-15
ENSG00000120937.8	NPPB	97.4903	-9.14243	1.08327	-8.43964	3.18328e-17	2.76677e-15
ENSG00000184602.5	SNN	11599.1	1.49377	0.177323	8.42403	3.63741e-17	3.14591e-15
ENSG00000120693.13	SMAD9	385.674	-3.18837	0.378545	-8.42269	3.6794e-17	3.16663e-15
ENSG00000122378.13	PRXL2A	17919.2	1.41532	0.168355	8.40674	4.21557e-17	3.61038e-15
ENSG00000156687.10	UNC5D	105.84	-4.32925	0.515721	-8.39457	4.67592e-17	3.9852e-15
ENSG00000135838.13	NPL	469.03	1.97281	0.235097	8.39145	4.80174e-17	4.07266e-15
ENSG00000156925.11	ZIC3	283.526	2.49631	0.297694	8.38547	5.05229e-17	4.26457e-15
ENSG00000100196.10	KDELR3	446.313	-2.0886	0.249487	-8.37156	5.68604e-17	4.77654e-15
ENSG00000189184.11	PCDH18	1010.8	-1.811	0.216563	-8.36243	6.14377e-17	5.13648e-15
ENSG00000050555.17	LAMC3	822.755	2.14407	0.25701	8.34236	7.28226e-17	6.03088e-15
ENSG00000130635.15	COL5A1	1937.48	-2.03556	0.24399	-8.34279	7.25592e-17	6.03088e-15
ENSG00000253368.3	TRNP1	304.058	-1.96843	0.236129	-8.33624	7.66917e-17	6.32148e-15
ENSG00000110697.12	PITPNM1	457.97	-1.90338	0.22859	-8.3266	8.31959e-17	6.82557e-15
ENSG00000197852.10	INKA2	354.546	3.12486	0.375558	8.32057	8.7541e-17	7.14864e-15
ENSG00000011028.13	MRC2	3953.68	-5.7743	0.694208	-8.31782	8.95964e-17	7.28261e-15
ENSG00000106066.14	CPVL	1264.91	2.08143	0.250428	8.31151	9.44924e-17	7.64518e-15
ENSG00000172175.13	MALT1	561.848	1.89015	0.227459	8.30984	9.58301e-17	7.71784e-15
ENSG00000126950.7	TMEM35A	336.889	-2.33391	0.281171	-8.30069	1.03506e-16	8.29798e-15
ENSG00000132669.13	RIN2	1627.91	-1.12436	0.13563	-8.28989	1.13356e-16	9.04635e-15
ENSG00000118777.11	ABCG2	5905.56	2.27567	0.275401	8.26311	1.41927e-16	1.12243e-14
ENSG00000113196.2	HAND1	121.961	-5.24771	0.635069	-8.26322	1.41791e-16	1.12243e-14
ENSG00000176692.6	FOXC2	1991.15	-2.62299	0.317726	-8.25551	1.51257e-16	1.19086e-14
ENSG00000183775.10	KCTD16	76.5525	-3.34724	0.407522	-8.21364	2.14586e-16	1.68191e-14
ENSG00000250786.1	SNHG18	82.2012	-4.21383	0.513681	-8.20321	2.3406e-16	1.8264e-14
ENSG00000013364.18	MVP	1885.02	-1.4837	0.181126	-8.19152	2.57955e-16	2.00394e-14
ENSG00000137267.5	TUBB2A	9554.88	1.38143	0.168731	8.18713	2.6752e-16	2.06909e-14
ENSG00000184588.17	PDE4B	7181.55	1.36138	0.166745	8.16443	3.22948e-16	2.48684e-14
ENSG00000148908.14	RGS10	1796.75	2.05914	0.252292	8.16171	3.30317e-16	2.52147e-14
ENSG00000113657.12	DPYSL3	370.619	-1.97858	0.24241	-8.16212	3.29182e-16	2.52147e-14
ENSG00000143502.14	SUSD4	238.824	-2.59176	0.318109	-8.14742	3.71785e-16	2.82573e-14
ENSG00000111799.20	COL12A1	172.77	-5.48005	0.673547	-8.13611	4.08176e-16	3.08894e-14
ENSG00000157557.11	ETS2	5728.91	1.10707	0.136172	8.12999	4.29343e-16	3.23518e-14
ENSG00000005884.17	ITGA3	1818.6	-2.04799	0.252133	-8.12265	4.56099e-16	3.42211e-14
ENSG00000121749.15	TBC1D15	1995.48	-1.2808	0.157933	-8.10978	5.071e-16	3.78858e-14
ENSG00000114779.19	ABHD14B	237.522	-1.95324	0.240881	-8.10871	5.1162e-16	3.80615e-14
ENSG00000125872.7	LRRN4	80.084	-4.6405	0.572637	-8.10373	5.32981e-16	3.94833e-14
ENSG00000117122.13	MFAP2	329.208	-2.09461	0.258637	-8.09867	5.55627e-16	4.0988e-14
ENSG00000167123.18	CERCAM	643.603	-1.48855	0.183862	-8.09604	5.6779e-16	4.171e-14
ENSG00000186642.15	PDE2A	5338.08	1.71649	0.212132	8.09158	5.88949e-16	4.30841e-14
ENSG00000164543.6	STK17A	2363.36	1.14888	0.142003	8.09048	5.94284e-16	4.3294e-14
ENSG00000150977.10	RILPL2	629.394	-2.2882	0.282961	-8.08664	6.13352e-16	4.44984e-14
ENSG00000126458.3	RRAS	1476.86	-1.2292	0.152173	-8.07763	6.604e-16	4.77146e-14
ENSG00000144711.15	IQSEC1	1515.89	1.15008	0.142711	8.0588	7.7049e-16	5.54406e-14
ENSG00000197977.3	ELOVL2	79.3444	-8.94333	1.11057	-8.05291	8.08459e-16	5.79352e-14
ENSG00000120594.16	PLXDC2	1807.16	-1.75737	0.218749	-8.03374	9.45432e-16	6.72022e-14
ENSG00000107165.12	TYRP1	77.5908	-8.6854	1.08106	-8.03414	9.42378e-16	6.72022e-14
ENSG00000124019.9	FAM124B	8543.16	1.25119	0.156004	8.02024	1.05542e-15	7.47181e-14
ENSG00000280623.1	PCAT14	1850.06	-2.34287	0.292575	-8.00778	1.16799e-15	8.23547e-14
ENSG00000135362.13	PRR5L	1087.09	1.91246	0.238951	8.00357	1.20859e-15	8.48772e-14
ENSG00000104267.9	CA2	136.768	2.55137	0.31891	8.00028	1.2414e-15	8.68336e-14
ENSG00000244509.3	APOBEC3C	476.287	-1.56221	0.195418	-7.99417	1.30449e-15	9.08848e-14
ENSG00000130303.12	BST2	9614	-4.17463	0.522497	-7.98977	1.3519e-15	9.38153e-14
ENSG00000182287.14	AP1S2	13551.8	1.0763	0.134744	7.98772	1.37455e-15	9.50118e-14
ENSG00000218336.8	TENM3	211.793	-2.32678	0.291435	-7.98386	1.41832e-15	9.76526e-14
ENSG00000113580.14	NR3C1	1564.55	-1.21603	0.152608	-7.96835	1.6081e-15	1.10287e-13
ENSG00000107779.13	BMPR1A	737.966	-2.72129	0.341717	-7.96358	1.67131e-15	1.14176e-13
ENSG00000159842.15	ABR	814.44	-1.26106	0.158497	-7.95638	1.77152e-15	1.20553e-13
ENSG00000064651.13	SLC12A2	1880.01	1.5298	0.192546	7.94511	1.94026e-15	1.31525e-13
ENSG00000164308.16	ERAP2	912.775	-1.37884	0.173581	-7.94347	1.96602e-15	1.32759e-13
ENSG00000157483.8	MYO1E	3836.23	-1.0817	0.136463	-7.92665	2.25132e-15	1.51443e-13
ENSG00000166292.11	TMEM100	7118.33	-6.12707	0.775174	-7.90412	2.69833e-15	1.80819e-13
ENSG00000188554.13	NBR1	3914.97	-0.927138	0.117361	-7.89987	2.79196e-15	1.86382e-13
ENSG00000203805.10	PLPP4	186.436	-4.40208	0.557989	-7.88918	3.0417e-15	2.02285e-13
ENSG00000272398.5	CD24	32598.7	-1.39798	0.177227	-7.88811	3.06808e-15	2.0257e-13
ENSG00000162645.12	GBP2	875.893	-1.40905	0.178631	-7.88807	3.06907e-15	2.0257e-13
ENSG00000124225.15	PMEPA1	1175.46	-1.18649	0.150592	-7.87888	3.30341e-15	2.17221e-13
ENSG00000172201.11	ID4	317.58	-2.22131	0.282604	-7.86015	3.83671e-15	2.51348e-13
ENSG00000115353.10	TACR1	2505.45	-2.39137	0.30439	-7.85628	3.95722e-15	2.58279e-13
ENSG00000121281.12	ADCY7	185.455	-2.41518	0.307835	-7.8457	4.30539e-15	2.79962e-13
ENSG00000163132.6	MSX1	1070.87	1.71466	0.218644	7.84228	4.42454e-15	2.86648e-13
ENSG00000184697.6	CLDN6	58.2484	-5.71263	0.728885	-7.83749	4.59651e-15	2.96694e-13
ENSG00000125266.7	EFNB2	22326.5	-1.19626	0.152771	-7.83041	4.86265e-15	3.12724e-13
ENSG00000181104.6	F2R	45549.1	-1.40177	0.179124	-7.82568	5.04914e-15	3.23532e-13
ENSG00000197705.9	KLHL14	461.814	9.60529	1.22835	7.81967	5.29631e-15	3.38136e-13
ENSG00000110900.14	TSPAN11	8292.99	-1.27549	0.163183	-7.81631	5.43935e-15	3.4601e-13
ENSG00000126785.12	RHOJ	4927.93	1.21182	0.155097	7.81327	5.57212e-15	3.53176e-13
ENSG00000178882.14	RFLNA	124.796	-2.88588	0.369995	-7.7998	6.20034e-15	3.9158e-13
ENSG00000151967.18	SCHIP1	4366.61	1.5476	0.198495	7.7967	6.35481e-15	3.99898e-13
ENSG00000115602.16	IL1RL1	755.565	-6.70617	0.863577	-7.76558	8.12735e-15	5.09614e-13
ENSG00000106714.17	CNTNAP3	569.622	2.39839	0.309833	7.74092	9.8699e-15	6.16676e-13
ENSG00000104368.17	PLAT	2510.06	-4.58343	0.592217	-7.73944	9.98526e-15	6.21671e-13
ENSG00000139508.14	SLC46A3	1703.34	-1.25032	0.161887	-7.72338	1.13283e-14	7.02792e-13
ENSG00000105426.16	PTPRS	448.618	-1.7192	0.222749	-7.71813	1.18052e-14	7.29803e-13
ENSG00000171476.21	HOPX	588.321	1.5177	0.196676	7.71676	1.19321e-14	7.35062e-13
ENSG00000141668.9	CBLN2	124.152	-4.3844	0.568281	-7.7152	1.20791e-14	7.41511e-13
ENSG00000182985.17	CADM1	655.782	-2.22922	0.289038	-7.71255	1.23332e-14	7.54473e-13
ENSG00000169306.9	IL1RAPL1	147.371	-2.99525	0.388579	-7.70823	1.27574e-14	7.77712e-13
ENSG00000138795.9	LEF1	1151.31	1.66064	0.215649	7.70068	1.35349e-14	8.22256e-13
ENSG00000120129.5	DUSP1	3889.12	-1.01146	0.131496	-7.6919	1.44961e-14	8.77614e-13
ENSG00000251442.5	LINC01094	108.05	2.61302	0.339884	7.68798	1.49478e-14	9.01852e-13
ENSG00000104435.13	STMN2	111.763	-4.88186	0.635616	-7.68051	1.58451e-14	9.52712e-13
ENSG00000130940.14	CASZ1	207.741	3.17472	0.413575	7.67628	1.63774e-14	9.81358e-13
ENSG00000189067.12	LITAF	255.988	-1.99549	0.26031	-7.66583	1.77674e-14	1.05859e-12
ENSG00000204264.9	PSMB8	141.384	-3.27016	0.426597	-7.66569	1.77869e-14	1.05859e-12
ENSG00000049759.17	NEDD4L	418.583	-1.49098	0.194554	-7.66359	1.80805e-14	1.07243e-12
ENSG00000261801.5	LOXL1-AS1	324.246	-2.43263	0.317919	-7.65174	1.98281e-14	1.17213e-12
ENSG00000179242.15	CDH4	76.6361	-7.19844	0.941151	-7.64855	2.03258e-14	1.19752e-12
ENSG00000187764.11	SEMA4D	455.806	-1.65392	0.21626	-7.64782	2.04413e-14	1.20029e-12
ENSG00000144645.13	OSBPL10	5074.06	0.918835	0.120168	7.64624	2.06947e-14	1.21112e-12
ENSG00000179403.11	VWA1	74.9895	-4.37272	0.572665	-7.63574	2.24532e-14	1.30967e-12
ENSG00000133083.14	DCLK1	266.854	3.44183	0.452394	7.60803	2.78315e-14	1.61801e-12
ENSG00000170456.15	DENND5B	1723.95	-1.31109	0.172388	-7.60547	2.83859e-14	1.64479e-12
ENSG00000113389.15	NPR3	22569.9	-2.26223	0.298153	-7.58747	3.26205e-14	1.88394e-12
ENSG00000108700.4	CCL8	408.509	3.46584	0.457977	7.56772	3.79838e-14	2.1865e-12
ENSG00000225968.7	ELFN1	614.379	-5.89089	0.778619	-7.56581	3.85444e-14	2.21151e-12
ENSG00000137166.14	FOXP4	268.196	-1.98201	0.262017	-7.56443	3.8957e-14	2.22791e-12
ENSG00000108679.12	LGALS3BP	456.737	-6.59518	0.873084	-7.55389	4.22432e-14	2.408e-12
ENSG00000197457.9	STMN3	129.772	-3.00438	0.398358	-7.54192	4.63107e-14	2.63132e-12
ENSG00000157601.13	MX1	251.845	-2.54078	0.337054	-7.53821	4.76467e-14	2.69849e-12
ENSG00000119686.9	FLVCR2	242.861	2.1796	0.289945	7.51731	5.59149e-14	3.15658e-12
ENSG00000137285.9	TUBB2B	3129.08	1.58713	0.211296	7.51141	5.84942e-14	3.29161e-12
ENSG00000079102.16	RUNX1T1	1468.79	-1.30337	0.173665	-7.50509	6.13863e-14	3.44332e-12
ENSG00000145246.13	ATP10D	1372.03	-1.11065	0.14812	-7.49835	6.46283e-14	3.60286e-12
ENSG00000244300.2	GATA2-AS1	161.362	-2.86318	0.381843	-7.49832	6.46409e-14	3.60286e-12
ENSG00000265107.2	GJA5	82645.2	-1.78175	0.237813	-7.49225	6.77051e-14	3.7617e-12
ENSG00000119922.9	IFIT2	245.73	-2.32971	0.31189	-7.46966	8.04053e-14	4.45324e-12
ENSG00000243989.8	ACY1	431.536	-1.35434	0.181344	-7.46834	8.12156e-14	4.48397e-12
ENSG00000107719.8	PALD1	10581.3	1.67085	0.223896	7.46259	8.48361e-14	4.66918e-12
ENSG00000160216.18	AGPAT3	803.51	-1.28629	0.172485	-7.4574	8.82485e-14	4.84181e-12
ENSG00000073756.11	PTGS2	790.273	-2.55031	0.342173	-7.45328	9.10507e-14	4.97999e-12
ENSG00000139946.9	PELI2	622.754	-1.67147	0.224448	-7.44706	9.54422e-14	5.20397e-12
ENSG00000135678.11	CPM	3797	-1.13292	0.152307	-7.43839	1.01923e-13	5.54015e-12
ENSG00000171388.11	APLN	5965.37	4.08911	0.55032	7.43043	1.08248e-13	5.86579e-12
ENSG00000172031.6	EPHX4	825.963	1.26896	0.170815	7.42889	1.0951e-13	5.9159e-12
ENSG00000006327.13	TNFRSF12A	913.965	-2.04004	0.274905	-7.42088	1.16342e-13	6.26567e-12
ENSG00000143850.14	PLEKHA6	59.8468	-8.30944	1.12565	-7.38193	1.56009e-13	8.37629e-12
ENSG00000171227.6	TMEM37	2045.18	1.53033	0.207371	7.37968	1.58671e-13	8.49323e-12
ENSG00000185559.14	DLK1	68.6375	-4.0729	0.552048	-7.3778	1.6093e-13	8.588e-12
ENSG00000143061.17	IGSF3	486.543	-1.51379	0.205224	-7.3763	1.62754e-13	8.659e-12
ENSG00000123989.13	CHPF	701.944	-6.69141	0.908095	-7.36862	1.72397e-13	9.14436e-12
ENSG00000164307.12	ERAP1	1558.33	-1.09817	0.149197	-7.36054	1.83165e-13	9.68623e-12
ENSG00000183010.16	PYCR1	1227.8	-1.31959	0.179497	-7.35163	1.95805e-13	1.03235e-11
ENSG00000160111.12	CPAMD8	210.173	-3.50735	0.478055	-7.33671	2.18903e-13	1.15068e-11
ENSG00000124145.6	SDC4	200	-3.20956	0.438196	-7.32447	2.39836e-13	1.25696e-11
ENSG00000163909.7	HEYL	323.54	-6.90015	0.942213	-7.32335	2.41855e-13	1.26376e-11
ENSG00000114626.17	ABTB1	128.172	-3.14737	0.430092	-7.3179	2.51884e-13	1.31226e-11
ENSG00000184916.8	JAG2	834.425	1.65577	0.226782	7.30116	2.85298e-13	1.48195e-11
ENSG00000101306.10	MYLK2	94.677	3.28838	0.45049	7.29955	2.88734e-13	1.49537e-11
ENSG00000105856.13	HBP1	4791.51	-0.907951	0.124485	-7.29365	3.01667e-13	1.55775e-11
ENSG00000184986.10	TMEM121	79.0158	-2.84707	0.391474	-7.2727	3.52377e-13	1.81427e-11
ENSG00000112294.12	ALDH5A1	357.824	-1.48456	0.204532	-7.25831	3.91954e-13	2.01214e-11
ENSG00000270547.5	LINC01235	219.36	2.99724	0.413086	7.25573	3.99514e-13	2.04498e-11
ENSG00000169783.12	LINGO1	787.049	-2.76339	0.381004	-7.2529	4.07951e-13	2.08209e-11
ENSG00000248441.6	LINC01197	51.5464	4.94761	0.682362	7.2507	4.14614e-13	2.10997e-11
ENSG00000160801.13	PTH1R	52.0365	-6.37898	0.879942	-7.24932	4.18868e-13	2.12545e-11
ENSG00000140937.13	CDH11	5350.43	-2.1163	0.291972	-7.2483	4.22038e-13	2.13537e-11
ENSG00000196502.11	SULT1A1	104.093	-2.56795	0.354363	-7.24668	4.27112e-13	2.15483e-11
ENSG00000156804.7	FBXO32	75.9592	-4.28847	0.593207	-7.22929	4.85508e-13	2.44242e-11
ENSG00000140465.13	CYP1A1	23375.4	3.37776	0.467336	7.22769	4.91285e-13	2.46443e-11
ENSG00000167107.12	ACSF2	72.003	-2.99172	0.414328	-7.22065	5.17391e-13	2.58799e-11
ENSG00000159251.7	ACTC1	350.809	-9.0208	1.24952	-7.21939	5.22229e-13	2.60317e-11
ENSG00000129465.15	RIPK3	59.4612	-3.77975	0.523578	-7.21908	5.23392e-13	2.60317e-11
ENSG00000047365.11	ARAP2	245.686	-2.65433	0.368339	-7.20623	5.75234e-13	2.85293e-11
ENSG00000136261.14	BZW2	5828.71	0.850029	0.118079	7.19882	6.07371e-13	3.00383e-11
ENSG00000170421.12	KRT8	12122.2	-3.6735	0.510444	-7.19667	6.16992e-13	3.04285e-11
ENSG00000154553.14	PDLIM3	174.616	-2.95668	0.41175	-7.18075	6.93277e-13	3.40949e-11
ENSG00000156711.16	MAPK13	463.496	-1.96051	0.273796	-7.16048	8.03948e-13	3.94271e-11
ENSG00000158473.6	CD1D	196.15	-2.75848	0.38573	-7.15133	8.59405e-13	4.20294e-11
ENSG00000129422.14	MTUS1	7106.77	-1.08931	0.152366	-7.1493	8.72217e-13	4.25376e-11
ENSG00000171246.5	NPTX1	126.298	-5.19727	0.727019	-7.14874	8.75752e-13	4.25916e-11
ENSG00000128284.19	APOL3	305.329	-2.29532	0.321198	-7.14611	8.92746e-13	4.32982e-11
ENSG00000146250.6	PRSS35	51.0287	-8.19168	1.14638	-7.14567	8.95604e-13	4.33171e-11
ENSG00000124440.15	HIF3A	2719.78	-1.33357	0.186739	-7.14136	9.24137e-13	4.45744e-11
ENSG00000185339.8	TCN2	5084.85	1.91744	0.268681	7.1365	9.57377e-13	4.59253e-11
ENSG00000138031.14	ADCY3	403.3	-1.90891	0.267484	-7.13656	9.56977e-13	4.59253e-11
ENSG00000154027.18	AK5	70.0762	-5.05281	0.711452	-7.10211	1.2287e-12	5.87799e-11
ENSG00000141293.15	SKAP1	152.974	2.55135	0.360142	7.08428	1.39772e-12	6.66841e-11
ENSG00000159216.18	RUNX1	263.02	-2.60505	0.367746	-7.08383	1.40224e-12	6.67184e-11
ENSG00000163217.1	BMP10	60.1381	-5.43365	0.76829	-7.07239	1.52284e-12	7.22606e-11
ENSG00000100100.12	PIK3IP1	1564.08	-1.53926	0.217858	-7.06546	1.6008e-12	7.57556e-11
ENSG00000165194.15	PCDH19	315.186	1.45076	0.205661	7.05415	1.73663e-12	8.19624e-11
ENSG00000118816.9	CCNI	6556.89	0.795492	0.112782	7.05335	1.74656e-12	8.22103e-11
ENSG00000174749.5	FAM241A	5166.95	0.99939	0.141744	7.05069	1.78027e-12	8.35728e-11
ENSG00000140545.14	MFGE8	1263.2	-1.0529	0.149342	-7.05026	1.78577e-12	8.36076e-11
ENSG00000069011.15	PITX1	196.498	-3.28151	0.465882	-7.04366	1.87252e-12	8.74358e-11
ENSG00000050344.8	NFE2L3	1870.89	-1.60826	0.229653	-7.003	2.50545e-12	1.16679e-10
ENSG00000114796.15	KLHL24	2082.16	-1.58561	0.227163	-6.98006	2.95059e-12	1.37046e-10
ENSG00000155511.17	GRIA1	106.573	-2.73919	0.392807	-6.97338	3.09417e-12	1.43336e-10
ENSG00000111057.10	KRT18	19750.3	-1.41941	0.203585	-6.97209	3.12277e-12	1.4428e-10
ENSG00000007866.20	TEAD3	78.4125	-4.97908	0.714768	-6.96601	3.26058e-12	1.50252e-10
ENSG00000147813.15	NAPRT	1233.8	-1.6913	0.242814	-6.96541	3.27452e-12	1.50499e-10
ENSG00000110811.19	P3H3	766.431	-2.00608	0.28836	-6.95687	3.47925e-12	1.59127e-10
ENSG00000091129.19	NRCAM	58.3854	-4.97352	0.714912	-6.95682	3.48036e-12	1.59127e-10
ENSG00000152128.13	TMEM163	1575.96	-1.18321	0.170124	-6.95498	3.52617e-12	1.60802e-10
ENSG00000122862.4	SRGN	100.156	-3.37636	0.485891	-6.9488	3.68406e-12	1.67567e-10
ENSG00000117152.13	RGS4	161.754	-3.44351	0.495667	-6.94722	3.72565e-12	1.69021e-10
ENSG00000005513.9	SOX8	117.865	-2.44214	0.351763	-6.94256	3.85058e-12	1.74239e-10
ENSG00000173706.13	HEG1	1225.7	-1.1841	0.17071	-6.93629	4.02519e-12	1.81672e-10
ENSG00000146278.10	PNRC1	2680.73	-0.82724	0.119462	-6.92469	4.36928e-12	1.96696e-10
ENSG00000164181.13	ELOVL7	301.732	-2.19405	0.31696	-6.92216	4.44819e-12	1.99736e-10
ENSG00000143369.14	ECM1	713.378	2.20532	0.318949	6.91433	4.70078e-12	2.1054e-10
ENSG00000122012.13	SV2C	88.558	-3.13223	0.454614	-6.88986	5.5846e-12	2.49488e-10
ENSG00000163683.11	SMIM14	649.802	-1.38442	0.201212	-6.88039	5.96909e-12	2.65988e-10
ENSG00000255112.2	CHMP1B	3185.77	-0.929724	0.135596	-6.85657	7.05348e-12	3.13514e-10
ENSG00000077238.13	IL4R	3913.29	-1.1462	0.167189	-6.85569	7.09681e-12	3.14643e-10
ENSG00000164035.9	EMCN	4805.11	-1.4419	0.210859	-6.83821	8.01885e-12	3.54627e-10
ENSG00000140600.16	SH3GL3	48.0003	-5.23043	0.765563	-6.83214	8.36556e-12	3.69031e-10
ENSG00000050767.16	COL23A1	1870.23	-1.80517	0.264241	-6.83152	8.40221e-12	3.69718e-10
ENSG00000211689.7	TRGC1	61.4484	7.93326	1.16175	6.82869	8.5693e-12	3.76128e-10
ENSG00000072832.14	CRMP1	4178.23	1.16936	0.171326	6.82533	8.77229e-12	3.84077e-10
ENSG00000153253.16	SCN3A	65.4986	4.91841	0.721055	6.82112	9.03318e-12	3.94516e-10
ENSG00000156265.15	MAP3K7CL	76.0504	-3.07209	0.450464	-6.81984	9.1144e-12	3.97076e-10
ENSG00000106123.11	EPHB6	96.3496	-4.23347	0.620866	-6.81866	9.18943e-12	3.99354e-10
ENSG00000168016.14	TRANK1	298.443	-2.12437	0.311766	-6.814	9.49236e-12	4.11499e-10
ENSG00000138162.18	TACC2	1449.6	1.42135	0.208647	6.81223	9.60953e-12	4.15553e-10
ENSG00000099282.9	TSPAN15	6997.45	1.03254	0.15177	6.80334	1.02223e-11	4.40965e-10
ENSG00000166426.7	CRABP1	265.581	-8.49395	1.25024	-6.79384	1.09184e-11	4.69838e-10
ENSG00000136842.13	TMOD1	641.557	-1.67704	0.246908	-6.79215	1.10471e-11	4.74216e-10
ENSG00000111424.10	VDR	37.9489	-7.77645	1.14543	-6.7891	1.12836e-11	4.83188e-10
ENSG00000122694.15	GLIPR2	387.435	-1.96443	0.289753	-6.77965	1.20464e-11	5.14595e-10
ENSG00000149557.13	FEZ1	2355.69	1.34683	0.198929	6.77039	1.28434e-11	5.4731e-10
ENSG00000250742.2	LINC02381	138.433	-2.06684	0.305345	-6.76886	1.298e-11	5.51789e-10
ENSG00000154589.6	LY96	130.709	2.04397	0.302145	6.76486	1.33435e-11	5.65874e-10
ENSG00000171621.13	SPSB1	626.355	-1.66998	0.246885	-6.76422	1.34031e-11	5.67032e-10
ENSG00000112335.14	SNX3	10694.4	0.87703	0.129667	6.76372	1.34491e-11	5.67609e-10
ENSG00000171303.6	KCNK3	80.0353	3.98166	0.59014	6.74698	1.50956e-11	6.35573e-10
ENSG00000170271.10	FAXDC2	237.685	-1.62649	0.241162	-6.74439	1.53669e-11	6.45446e-10
ENSG00000178695.5	KCTD12	1078.17	1.36758	0.203013	6.73644	1.62318e-11	6.80147e-10
ENSG00000166963.12	MAP1A	248.071	-2.68794	0.39944	-6.72928	1.70503e-11	7.12745e-10
ENSG00000129467.13	ADCY4	2971.89	-0.841205	0.125159	-6.72109	1.80365e-11	7.52178e-10
ENSG00000099889.13	ARVCF	2058.82	1.77201	0.263686	6.72015	1.81535e-11	7.55264e-10
ENSG00000236609.3	ZNF853	538.674	-1.42373	0.212085	-6.71301	1.90652e-11	7.9132e-10
ENSG00000170153.10	RNF150	142.582	-2.16345	0.322387	-6.71071	1.9368e-11	8.01992e-10
ENSG00000186918.13	ZNF395	298.231	-2.08867	0.31141	-6.70712	1.98499e-11	8.20012e-10
ENSG00000117643.14	MAN1C1	199.282	2.5287	0.377331	6.70152	2.0626e-11	8.5007e-10
ENSG00000116679.15	IVNS1ABP	5630.01	-1.01395	0.151328	-6.70035	2.07925e-11	8.54926e-10
ENSG00000143367.15	TUFT1	326.268	-2.29977	0.343473	-6.69563	2.14738e-11	8.80875e-10
ENSG00000244486.8	SCARF2	1085.16	-1.92142	0.287651	-6.6797	2.39432e-11	9.79885e-10
ENSG00000175264.7	CHST1	6867.97	3.74375	0.560574	6.67841	2.41544e-11	9.86231e-10
ENSG00000180660.7	MAB21L1	73.0279	3.68193	0.551861	6.67184	2.52615e-11	1.02904e-09
ENSG00000026508.18	CD44	3222.06	-1.9868	0.297854	-6.67038	2.55144e-11	1.03694e-09
ENSG00000187634.11	SAMD11	41.3227	-4.3478	0.6526	-6.66228	2.69608e-11	1.09319e-09
ENSG00000169604.19	ANTXR1	527.557	-2.33232	0.350198	-6.66001	2.73812e-11	1.10768e-09
ENSG00000112837.16	TBX18	38.3202	-7.68331	1.15393	-6.65839	2.76848e-11	1.11738e-09
ENSG00000105088.8	OLFM2	176.089	-1.78013	0.267455	-6.65583	2.81704e-11	1.13437e-09
ENSG00000105854.12	PON2	5296.44	0.810937	0.122009	6.64656	3.00024e-11	1.20263e-09
ENSG00000156103.15	MMP16	1993.25	-1.18359	0.178068	-6.64687	2.99392e-11	1.20263e-09
ENSG00000075223.13	SEMA3C	68.5421	-4.43976	0.668308	-6.64328	3.06789e-11	1.22694e-09
ENSG00000131711.14	MAP1B	8899.11	0.818986	0.123307	6.64185	3.09776e-11	1.23608e-09
ENSG00000103187.7	COTL1	30677.6	1.07776	0.162306	6.64027	3.13109e-11	1.24372e-09
ENSG00000136114.16	THSD1	6226	1.56926	0.236324	6.6403	3.13046e-11	1.24372e-09
ENSG00000161800.12	RACGAP1	916.051	-0.979919	0.147607	-6.63872	3.16416e-11	1.25402e-09
ENSG00000082014.16	SMARCD3	177.017	-2.27289	0.342506	-6.63605	3.22191e-11	1.27403e-09
ENSG00000260802.1	SERTM2	32.7181	-8.11946	1.22542	-6.62584	3.45285e-11	1.36229e-09
ENSG00000174080.10	CTSF	450.57	-1.72775	0.261202	-6.61464	3.72464e-11	1.46622e-09
ENSG00000111371.15	SLC38A1	3678.92	1.08894	0.164734	6.61028	3.83601e-11	1.50669e-09
ENSG00000119787.13	ATL2	2311.17	-1.30103	0.19688	-6.60823	3.88937e-11	1.52423e-09
ENSG00000166450.12	PRTG	2410.46	1.40216	0.21243	6.60057	4.09581e-11	1.60156e-09
ENSG00000174738.12	NR1D2	1206.13	-1.45015	0.220309	-6.58234	4.6311e-11	1.80685e-09
ENSG00000187608.9	ISG15	1143.85	-1.66516	0.253023	-6.58106	4.67108e-11	1.81841e-09
ENSG00000107105.14	ELAVL2	208.882	1.78954	0.272014	6.57883	4.74169e-11	1.84181e-09
ENSG00000168765.16	GSTM4	102.83	-2.77609	0.422057	-6.57754	4.78303e-11	1.85377e-09
ENSG00000056998.19	GYG2	967.934	-1.00767	0.1534	-6.56893	5.06783e-11	1.95551e-09
ENSG00000160191.17	PDE9A	161.84	-1.74331	0.265385	-6.56896	5.06671e-11	1.95551e-09
ENSG00000181804.14	SLC9A9	1128.35	-1.67068	0.254509	-6.56432	5.2272e-11	2.01259e-09
ENSG00000231749.3	ABCA9-AS1	38.9408	8.12486	1.2393	6.55599	5.52751e-11	2.12356e-09
ENSG00000119917.13	IFIT3	1285.36	-1.16075	0.177252	-6.5486	5.80809e-11	2.22311e-09
ENSG00000107130.9	NCS1	256.169	-1.63111	0.249082	-6.5485	5.81197e-11	2.22311e-09
ENSG00000114948.12	ADAM23	642.762	-2.05249	0.313459	-6.54786	5.83681e-11	2.22776e-09
ENSG00000104549.11	SQLE	12395.1	0.902692	0.138209	6.53137	6.51722e-11	2.48206e-09
ENSG00000163702.19	IL17RC	313.756	-2.10957	0.323015	-6.53086	6.53921e-11	2.48504e-09
ENSG00000159023.21	EPB41	2403.78	-1.02987	0.157802	-6.52634	6.7396e-11	2.55566e-09
ENSG00000133687.15	TMTC1	126.595	-2.46459	0.377816	-6.52327	6.87922e-11	2.60298e-09
ENSG00000101265.15	RASSF2	7298.78	1.84168	0.282558	6.51788	7.13061e-11	2.69231e-09
ENSG00000012822.15	CALCOCO1	1648.87	-0.944685	0.144956	-6.51703	7.17131e-11	2.70186e-09
ENSG00000185760.15	KCNQ5	42.8079	-5.63674	0.865059	-6.51602	7.21995e-11	2.71436e-09
ENSG00000099960.12	SLC7A4	37.52	-8.03439	1.23319	-6.51513	7.26261e-11	2.72456e-09
ENSG00000196209.12	SIRPB2	516.582	1.52356	0.234027	6.51019	7.50571e-11	2.80976e-09
ENSG00000101096.19	NFATC2	382.858	2.80806	0.431492	6.50777	7.62732e-11	2.84921e-09
ENSG00000138166.5	DUSP5	4279.13	-1.38647	0.213275	-6.50086	7.98639e-11	2.97701e-09
ENSG00000137573.13	SULF1	6180.42	-6.91506	1.06421	-6.49785	8.14759e-11	3.03066e-09
ENSG00000060656.19	PTPRU	522.905	-1.85303	0.285418	-6.49235	8.45095e-11	3.13686e-09
ENSG00000064225.12	ST3GAL6	1506.14	-1.47047	0.226663	-6.4875	8.72738e-11	3.23263e-09
ENSG00000205221.12	VIT	83.8423	4.20488	0.65164	6.45276	1.09831e-10	4.05959e-09
ENSG00000068078.18	FGFR3	41.496	-5.371	0.832597	-6.4509	1.11187e-10	4.10108e-09
ENSG00000274583.1	FAM74A4	33.9528	6.58181	1.0213	6.44454	1.15952e-10	4.26785e-09
ENSG00000111913.18	RIPOR2	170.047	-2.49276	0.386978	-6.44162	1.18206e-10	4.34172e-09
ENSG00000105963.14	ADAP1	57.6149	-4.52831	0.703113	-6.44037	1.19183e-10	4.36846e-09
ENSG00000152270.8	PDE3B	425.68	-1.59033	0.247027	-6.4379	1.21141e-10	4.43099e-09
ENSG00000152409.8	JMY	152.29	-1.82769	0.284009	-6.43533	1.23208e-10	4.4972e-09
ENSG00000180801.13	ARSJ	506.069	-2.07022	0.321777	-6.43372	1.24518e-10	4.53559e-09
ENSG00000163072.15	NOSTRIN	321.429	1.46236	0.227448	6.42944	1.28075e-10	4.65551e-09
ENSG00000131477.10	RAMP2	7475.55	-0.982763	0.153439	-6.4049	1.50463e-10	5.45802e-09
ENSG00000198467.14	TPM2	3809.63	-3.21904	0.503103	-6.39838	1.5703e-10	5.68449e-09
ENSG00000152092.15	ASTN1	612.519	-1.49071	0.233128	-6.39437	1.61213e-10	5.82336e-09
ENSG00000099994.10	SUSD2	47.9683	-3.45745	0.540728	-6.39407	1.6153e-10	5.82336e-09
ENSG00000114812.12	VIPR1	46.0349	5.32271	0.832946	6.39022	1.65644e-10	5.95945e-09
ENSG00000157510.13	AFAP1L1	20517.1	0.955271	0.149728	6.38002	1.7706e-10	6.35715e-09
ENSG00000179855.6	GIPC3	294.282	-1.4641	0.229504	-6.37938	1.77807e-10	6.37092e-09
ENSG00000116667.13	C1orf21	1051.25	-1.32077	0.207215	-6.37393	1.84242e-10	6.58806e-09
ENSG00000165801.9	ARHGEF40	580.832	-1.38494	0.217321	-6.37278	1.85631e-10	6.62424e-09
ENSG00000183166.10	CALN1	241.795	-3.11941	0.489788	-6.36891	1.9038e-10	6.77993e-09
ENSG00000184497.12	TMEM255B	4489.5	0.877336	0.137822	6.36571	1.94385e-10	6.90855e-09
ENSG00000105643.9	ARRDC2	397.953	-1.20469	0.189383	-6.36115	2.00248e-10	7.10253e-09
ENSG00000125347.13	IRF1	1508.04	-1.20836	0.190131	-6.35541	2.07867e-10	7.3579e-09
ENSG00000171105.13	INSR	1635.76	-1.16819	0.183834	-6.35459	2.0898e-10	7.38241e-09
ENSG00000108306.12	FBXL20	801.535	-1.20938	0.190329	-6.35414	2.09589e-10	7.38907e-09
ENSG00000166147.13	FBN1	3855.74	-1.48439	0.233754	-6.35022	2.1501e-10	7.56499e-09
ENSG00000166396.12	SERPINB7	47.2514	-4.70465	0.741272	-6.34672	2.19952e-10	7.72339e-09
ENSG00000146197.8	SCUBE3	372.747	-2.64097	0.416337	-6.34337	2.24799e-10	7.87782e-09
ENSG00000107331.16	ABCA2	163.415	-2.7582	0.435086	-6.33943	2.3061e-10	8.06537e-09
ENSG00000175224.16	ATG13	2480.7	-0.892345	0.140792	-6.33805	2.32686e-10	8.12182e-09
ENSG00000143469.18	SYT14	346.628	-1.81143	0.286051	-6.33254	2.41152e-10	8.40062e-09
ENSG00000139641.12	ESYT1	13217.3	0.887035	0.140341	6.32055	2.60636e-10	9.06136e-09
ENSG00000119820.10	YIPF4	2173.09	-0.89362	0.141504	-6.31514	2.69911e-10	9.3468e-09
ENSG00000163975.11	MELTF	35.294	-7.06506	1.11872	-6.31533	2.69582e-10	9.3468e-09
ENSG00000050165.17	DKK3	753.163	-1.77243	0.280719	-6.31388	2.72123e-10	9.40485e-09
ENSG00000091592.15	NLRP1	1451.1	-1.02498	0.162602	-6.30361	2.9079e-10	1.00303e-08
ENSG00000133107.14	TRPC4	45.3816	-3.51984	0.559077	-6.2958	3.05824e-10	1.05281e-08
ENSG00000134243.11	SORT1	5497.66	-0.877025	0.139351	-6.29363	3.10134e-10	1.06556e-08
ENSG00000113555.5	PCDH12	8244.93	1.07291	0.170494	6.29291	3.11573e-10	1.06841e-08
ENSG00000134138.19	MEIS2	1348.8	-1.11726	0.177711	-6.28697	3.23728e-10	1.10793e-08
ENSG00000138646.8	HERC5	545.124	-2.01471	0.320618	-6.28384	3.30308e-10	1.12825e-08
ENSG00000172247.3	C1QTNF4	90.6008	3.30327	0.526273	6.27671	3.45807e-10	1.1789e-08
ENSG00000136111.13	TBC1D4	3735.66	0.999521	0.159433	6.26924	3.62824e-10	1.23451e-08
ENSG00000058091.16	CDK14	1140.39	-1.96841	0.314136	-6.2661	3.70199e-10	1.25717e-08
ENSG00000129951.18	PLPPR3	148.891	-2.36267	0.377156	-6.26443	3.74185e-10	1.26826e-08
ENSG00000162458.12	FBLIM1	6288.05	-0.724497	0.115709	-6.26136	3.81627e-10	1.29099e-08
ENSG00000171056.7	SOX7	4642.41	1.30837	0.209141	6.25593	3.95164e-10	1.33421e-08
ENSG00000158258.16	CLSTN2	75.8331	-2.65827	0.425592	-6.24606	4.20923e-10	1.41845e-08
ENSG00000180739.13	S1PR5	37.2446	-7.55123	1.20911	-6.24527	4.23074e-10	1.42297e-08
ENSG00000034677.12	RNF19A	4219.74	1.33877	0.214457	6.2426	4.30356e-10	1.4447e-08
ENSG00000135108.14	FBXO21	6353.21	-0.816753	0.130876	-6.24064	4.35788e-10	1.46014e-08
ENSG00000176435.6	CLEC14A	34364.7	-0.70296	0.112744	-6.23503	4.51695e-10	1.51055e-08
ENSG00000160200.17	CBS	679.505	-1.18367	0.190132	-6.22553	4.79918e-10	1.60189e-08
ENSG00000125851.9	PCSK2	281.739	8.01923	1.29142	6.20961	5.31164e-10	1.76957e-08
ENSG00000159167.11	STC1	2215.08	1.99222	0.320967	6.20691	5.40356e-10	1.79339e-08
ENSG00000099284.13	H2AFY2	1538.3	-1.18147	0.190341	-6.20714	5.39588e-10	1.79339e-08
ENSG00000162738.5	VANGL2	257.242	-2.67964	0.431895	-6.20436	5.49195e-10	1.81928e-08
ENSG00000149260.16	CAPN5	1703.31	-0.981531	0.158253	-6.20229	5.56463e-10	1.83989e-08
ENSG00000152049.6	KCNE4	90.3672	-5.59387	0.902781	-6.19627	5.78173e-10	1.90808e-08
ENSG00000143162.8	CREG1	5933.68	0.881512	0.142303	6.19462	5.84241e-10	1.92089e-08
ENSG00000197375.12	SLC22A5	274.381	-1.49467	0.241278	-6.19483	5.83497e-10	1.92089e-08
ENSG00000101605.12	MYOM1	40.0831	-4.55264	0.735115	-6.1931	5.89908e-10	1.93589e-08
ENSG00000168398.6	BDKRB2	37.8557	-7.13295	1.1523	-6.1902	6.00897e-10	1.96828e-08
ENSG00000267583.5	AC007998.3	50.8378	4.33125	0.699792	6.18934	6.04158e-10	1.97527e-08
ENSG00000088543.14	C3orf18	110.965	-2.06097	0.333069	-6.18784	6.09958e-10	1.99053e-08
ENSG00000105329.9	TGFB1	7285.86	-1.10069	0.177923	-6.18632	6.15844e-10	2.00601e-08
ENSG00000151892.14	GFRA1	64.4977	-3.95627	0.640003	-6.18164	6.34386e-10	2.06258e-08
ENSG00000099869.7	IGF2-AS	167.545	-2.45937	0.398477	-6.17193	6.74623e-10	2.18934e-08
ENSG00000186994.11	KANK3	2059.95	2.08868	0.338462	6.17108	6.78234e-10	2.197e-08
ENSG00000156298.12	TSPAN7	17867.9	-1.43936	0.233455	-6.16547	7.02732e-10	2.27217e-08
ENSG00000178053.17	MLF1	1884.11	1.27812	0.207412	6.16223	7.17256e-10	2.31486e-08
ENSG00000150630.3	VEGFC	1679.33	-0.87285	0.141695	-6.16008	7.27071e-10	2.34224e-08
ENSG00000112183.14	RBM24	818.817	1.65561	0.268797	6.15932	7.30565e-10	2.34918e-08
ENSG00000163637.12	PRICKLE2	572.681	-2.19923	0.357156	-6.15762	7.38453e-10	2.3702e-08
ENSG00000179604.9	CDC42EP4	691.468	-1.29957	0.211106	-6.156	7.46069e-10	2.39028e-08
ENSG00000118432.12	CNR1	54.2113	-4.33495	0.704224	-6.15564	7.47761e-10	2.39134e-08
ENSG00000196466.10	ZNF799	335.08	1.52728	0.248161	6.1544	7.53611e-10	2.40566e-08
ENSG00000118513.18	MYB	158.171	-2.81782	0.457934	-6.15333	7.58713e-10	2.41755e-08
ENSG00000175183.9	CSRP2	1863.1	1.06914	0.173874	6.14892	7.80104e-10	2.48121e-08
ENSG00000113916.17	BCL6	189.416	-1.90106	0.309437	-6.14359	8.06751e-10	2.56132e-08
ENSG00000013297.11	CLDN11	120.941	-3.6584	0.595617	-6.1422	8.1387e-10	2.57926e-08
ENSG00000166250.11	CLMP	26.4589	-7.84036	1.27669	-6.14116	8.1922e-10	2.59154e-08
ENSG00000182853.11	VMO1	31.6096	-5.09258	0.830105	-6.13486	8.52354e-10	2.69151e-08
ENSG00000151692.14	RNF144A	7552.3	0.999924	0.163048	6.13272	8.63917e-10	2.72312e-08
ENSG00000168685.14	IL7R	130.898	-2.98519	0.486813	-6.1321	8.67277e-10	2.72881e-08
ENSG00000146122.16	DAAM2	148.206	-3.1882	0.520132	-6.12961	8.80966e-10	2.76693e-08
ENSG00000138756.17	BMP2K	1450.8	1.26107	0.206182	6.1163	9.57712e-10	2.99725e-08
ENSG00000164100.8	NDST3	181.071	-1.74123	0.284683	-6.1164	9.571e-10	2.99725e-08
ENSG00000059728.10	MXD1	331.638	-1.41273	0.231087	-6.11341	9.75251e-10	3.04671e-08
ENSG00000162496.8	DHRS3	1864.73	-1.31228	0.214778	-6.10991	9.9687e-10	3.10871e-08
ENSG00000079156.16	OSBPL6	138.995	-2.10055	0.344301	-6.10089	1.05476e-09	3.28342e-08
ENSG00000188763.4	FZD9	350.123	-2.01753	0.330949	-6.09618	1.0863e-09	3.3756e-08
ENSG00000185155.11	MIXL1	87.9106	-4.26564	0.699888	-6.09474	1.09616e-09	3.40024e-08
ENSG00000107438.8	PDLIM1	1744.4	-1.25962	0.206704	-6.09385	1.10224e-09	3.41306e-08
ENSG00000162981.13	FAM84A	2664.04	0.889172	0.146003	6.0901	1.12839e-09	3.48788e-08
ENSG00000182307.13	C8orf33	9976.27	-0.808779	0.132875	-6.08676	1.15219e-09	3.55519e-08
ENSG00000166106.3	ADAMTS15	30.3439	-7.74461	1.27267	-6.08531	1.16265e-09	3.58115e-08
ENSG00000142961.14	MOB3C	1515.93	1.53562	0.252598	6.07931	1.20704e-09	3.71137e-08
ENSG00000184792.15	OSBP2	200.371	1.74429	0.287458	6.06797	1.29534e-09	3.97594e-08
ENSG00000067141.16	NEO1	839.629	-1.13087	0.18658	-6.06105	1.35237e-09	4.14372e-08
ENSG00000121900.18	TMEM54	53.9874	-2.68426	0.443285	-6.05539	1.4008e-09	4.28465e-08
ENSG00000163092.19	XIRP2	74.6113	3.77713	0.623865	6.0544	1.40944e-09	4.30356e-08
ENSG00000143641.9	GALNT2	4014.09	-0.981907	0.16229	-6.05031	1.44571e-09	4.40664e-08
ENSG00000145390.11	USP53	957.412	-1.08784	0.180038	-6.04227	1.51958e-09	4.62377e-08
ENSG00000177191.2	B3GNT8	185.51	-2.39791	0.39714	-6.03794	1.56097e-09	4.74151e-08
ENSG00000169860.6	P2RY1	3319.26	-0.958894	0.158907	-6.03431	1.59646e-09	4.84095e-08
ENSG00000188488.13	SERPINA5	120.087	-2.73511	0.453523	-6.03081	1.63144e-09	4.93848e-08
ENSG00000163840.9	DTX3L	778.804	-1.30464	0.216402	-6.02877	1.65211e-09	4.99245e-08
ENSG00000173517.10	PEAK1	1895.26	0.835281	0.138629	6.02529	1.68805e-09	5.09228e-08
ENSG00000054793.13	ATP9A	2744.68	1.00522	0.166871	6.02394	1.70216e-09	5.12605e-08
ENSG00000167779.8	IGFBP6	396.872	2.37445	0.397052	5.98019	2.22882e-09	6.70059e-08
ENSG00000134817.10	APLNR	14166.7	6.05414	1.01245	5.97967	2.23585e-09	6.71023e-08
ENSG00000133639.4	BTG1	3957.9	-0.726068	0.121542	-5.9738	2.31789e-09	6.94458e-08
ENSG00000101986.11	ABCD1	492.352	-1.14952	0.192498	-5.97162	2.34904e-09	7.01895e-08
ENSG00000168394.11	TAP1	459.268	-1.97357	0.330497	-5.97151	2.35071e-09	7.01895e-08
ENSG00000114742.13	WDR48	2131.65	-0.974643	0.163255	-5.97006	2.37164e-09	7.06941e-08
ENSG00000134326.11	CMPK2	157.641	-2.51729	0.421765	-5.96848	2.39478e-09	7.12629e-08
ENSG00000130700.6	GATA5	29.7232	-7.22932	1.21185	-5.96554	2.43824e-09	7.24336e-08
ENSG00000196923.13	PDLIM7	3165.23	-0.886598	0.148803	-5.95818	2.55056e-09	7.56423e-08
ENSG00000171864.4	PRND	20233.7	6.33052	1.06267	5.95718	2.56633e-09	7.59816e-08
ENSG00000168785.7	TSPAN5	3392.31	0.871426	0.146377	5.9533	2.62794e-09	7.76747e-08
ENSG00000152208.12	GRID2	33.5688	7.06039	1.18806	5.9428	2.80199e-09	8.26799e-08
ENSG00000082684.15	SEMA5B	452.463	-4.30797	0.725487	-5.93803	2.88459e-09	8.49743e-08
ENSG00000167037.18	SGSM1	219.37	-1.67104	0.281458	-5.9371	2.90107e-09	8.53166e-08
ENSG00000157978.11	LDLRAP1	1764.04	0.950481	0.160244	5.93146	3.00253e-09	8.81529e-08
ENSG00000142910.15	TINAGL1	1095.37	-1.94223	0.327839	-5.92435	3.13533e-09	9.18982e-08
ENSG00000159899.14	NPR2	101.903	-2.78822	0.471166	-5.91769	3.26491e-09	9.55367e-08
ENSG00000123130.16	ACOT9	4230.68	0.797637	0.134802	5.91712	3.27632e-09	9.57111e-08
ENSG00000138386.16	NAB1	674.162	-1.07361	0.181514	-5.91475	3.32386e-09	9.69387e-08
ENSG00000165300.7	SLITRK5	59.1129	-2.97565	0.503415	-5.91092	3.40205e-09	9.90544e-08
ENSG00000253616.5	AC107959.3	55.778	-2.73841	0.463878	-5.9033	3.56297e-09	1.03568e-07
ENSG00000183807.7	FAM162B	97.0661	2.39139	0.405223	5.90142	3.60394e-09	1.04586e-07
ENSG00000089327.14	FXYD5	1275.16	-1.21105	0.20536	-5.89722	3.69667e-09	1.071e-07
ENSG00000260314.2	MRC1	2262.54	1.68712	0.286202	5.89487	3.74982e-09	1.08432e-07
ENSG00000022267.16	FHL1	884.484	-1.20688	0.204742	-5.89464	3.755e-09	1.08432e-07
ENSG00000226197.2	AL583785.1	82.3482	3.287	0.558266	5.88788	3.91182e-09	1.12765e-07
ENSG00000180354.15	MTURN	150.038	-2.17651	0.369676	-5.88762	3.91792e-09	1.12765e-07
ENSG00000144857.14	BOC	193.446	-1.44792	0.245994	-5.88602	3.9561e-09	1.13678e-07
ENSG00000112782.16	CLIC5	47.6587	4.7064	0.801423	5.87256	4.29124e-09	1.23107e-07
ENSG00000111674.8	ENO2	353.574	-2.1868	0.372751	-5.86666	4.44669e-09	1.27358e-07
ENSG00000120645.11	IQSEC3	185.905	2.85207	0.48662	5.86098	4.60149e-09	1.31577e-07
ENSG00000130702.15	LAMA5	5754.32	-1.47343	0.251436	-5.86006	4.62712e-09	1.32095e-07
ENSG00000137727.12	ARHGAP20	93.7687	-2.74426	0.468362	-5.85928	4.64877e-09	1.32498e-07
ENSG00000156535.14	CD109	525.659	1.75247	0.299136	5.85842	4.67305e-09	1.32974e-07
ENSG00000170011.13	MYRIP	57.148	4.34963	0.742733	5.85625	4.7343e-09	1.34498e-07
ENSG00000128606.12	LRRC17	189.033	-3.06335	0.523379	-5.85303	4.82695e-09	1.36909e-07
ENSG00000268592.3	RAET1E-AS1	77.8283	-2.34767	0.401269	-5.85062	4.89738e-09	1.38683e-07
ENSG00000163762.6	TM4SF18	1663.99	1.85887	0.317749	5.85013	4.91199e-09	1.38873e-07
ENSG00000184374.2	COLEC10	315.897	-1.86502	0.319012	-5.84624	5.02807e-09	1.41926e-07
ENSG00000153561.12	RMND5A	3294.76	-0.828002	0.14168	-5.84415	5.09148e-09	1.43485e-07
ENSG00000198948.11	MFAP3L	880.401	1.47896	0.253079	5.84386	5.10036e-09	1.43505e-07
ENSG00000211445.11	GPX3	268.705	-2.57825	0.441432	-5.84065	5.19961e-09	1.46063e-07
ENSG00000163364.9	LINC01116	155.888	1.7491	0.299693	5.83628	5.33778e-09	1.49705e-07
ENSG00000113369.8	ARRDC3	8942.74	-1.15301	0.197667	-5.83308	5.44129e-09	1.52365e-07
ENSG00000143753.12	DEGS1	13046	-0.929329	0.159401	-5.83012	5.53871e-09	1.54846e-07
ENSG00000235162.8	C12orf75	650.877	-1.17855	0.202282	-5.82625	5.66856e-09	1.58224e-07
ENSG00000146648.17	EGFR	197.542	-1.68421	0.289164	-5.8244	5.73182e-09	1.59701e-07
ENSG00000141314.12	RHBDL3	48.3807	-5.1058	0.876657	-5.82417	5.73968e-09	1.59701e-07
ENSG00000166394.14	CYB5R2	72.7568	-3.57164	0.613409	-5.8226	5.79392e-09	1.60955e-07
ENSG00000139874.5	SSTR1	10661.5	-1.2246	0.2104	-5.82037	5.87167e-09	1.62858e-07
ENSG00000120156.20	TEK	24398.4	-1.27689	0.219529	-5.81648	6.00983e-09	1.66427e-07
ENSG00000164442.9	CITED2	408.282	-1.10678	0.190457	-5.81116	6.20421e-09	1.71539e-07
ENSG00000118804.8	STBD1	117.806	-2.09795	0.361057	-5.81057	6.22616e-09	1.71875e-07
ENSG00000179603.17	GRM8	77.4601	-4.42697	0.761945	-5.81009	6.24382e-09	1.72092e-07
ENSG00000167106.11	FAM102A	1795.14	1.29813	0.223446	5.80957	6.26333e-09	1.72359e-07
ENSG00000186297.11	GABRA5	45.4478	-7.26695	1.25101	-5.80887	6.28949e-09	1.72808e-07
ENSG00000123124.13	WWP1	1323.58	1.17812	0.202881	5.80698	6.36103e-09	1.74501e-07
ENSG00000163293.11	NIPAL1	248.445	-1.29221	0.222598	-5.80515	6.43091e-09	1.76143e-07
ENSG00000106624.10	AEBP1	2062.15	-1.62912	0.280953	-5.79853	6.68981e-09	1.82949e-07
ENSG00000103657.13	HERC1	2570.84	-0.8685	0.14982	-5.79694	6.75359e-09	1.84406e-07
ENSG00000111144.9	LTA4H	4103.06	0.726324	0.125504	5.78727	7.15377e-09	1.95029e-07
ENSG00000187676.7	B3GLCT	1472.24	-0.784927	0.135717	-5.78356	7.31348e-09	1.98459e-07
ENSG00000122254.6	HS3ST2	53.5236	-6.12314	1.05869	-5.78372	7.30682e-09	1.98459e-07
ENSG00000181541.5	MAB21L2	35.9752	-5.82329	1.00685	-5.78366	7.30947e-09	1.98459e-07
ENSG00000079308.18	TNS1	268.897	-1.53813	0.266088	-5.78054	7.44598e-09	2.01742e-07
ENSG00000164292.12	RHOBTB3	3655.43	-1.26907	0.21969	-5.77666	7.61986e-09	2.06135e-07
ENSG00000070404.9	FSTL3	337.099	-1.73881	0.30128	-5.77141	7.86116e-09	2.12336e-07
ENSG00000144485.10	HES6	252.574	2.01798	0.349707	5.77048	7.9046e-09	2.13181e-07
ENSG00000173705.8	SUSD5	460.364	-1.42381	0.246873	-5.76737	8.05196e-09	2.16823e-07
ENSG00000183691.4	NOG	37.6327	-3.46957	0.601615	-5.7671	8.0649e-09	2.16838e-07
ENSG00000105889.15	STEAP1B	183.942	1.5721	0.272839	5.76202	8.31147e-09	2.23126e-07
ENSG00000099194.5	SCD	27069.3	0.751752	0.130497	5.76067	8.37798e-09	2.24273e-07
ENSG00000104611.11	SH2D4A	48.5205	-3.21448	0.558008	-5.76064	8.37973e-09	2.24273e-07
ENSG00000116132.11	PRRX1	346.735	5.72243	0.994141	5.75616	8.60501e-09	2.29952e-07
ENSG00000111653.19	ING4	1067.09	-0.909168	0.158049	-5.75245	8.79595e-09	2.34697e-07
ENSG00000188176.11	SMTNL2	26.8204	-5.88273	1.02328	-5.74892	8.98128e-09	2.39278e-07
ENSG00000178764.7	ZHX2	581.189	-1.15592	0.201139	-5.74686	9.0918e-09	2.41856e-07
ENSG00000167552.13	TUBA1A	69876.5	0.767066	0.133617	5.74078	9.42395e-09	2.50312e-07
ENSG00000183671.12	GPR1	248.827	2.11498	0.368486	5.73966	9.48682e-09	2.51601e-07
ENSG00000103811.16	CTSH	174.276	2.04301	0.355988	5.73899	9.52401e-09	2.52207e-07
ENSG00000254087.7	LYN	2371.9	0.778311	0.135657	5.73736	9.61643e-09	2.54271e-07
ENSG00000169413.2	RNASE6	443.918	1.4125	0.246407	5.73241	9.90132e-09	2.6141e-07
ENSG00000114315.3	HES1	777.247	1.11585	0.194704	5.73099	9.9844e-09	2.63207e-07
ENSG00000110881.11	ASIC1	21.2988	-7.52406	1.31331	-5.72908	1.00979e-08	2.658e-07
ENSG00000114554.11	PLXNA1	242.163	-2.2324	0.39028	-5.71999	1.0653e-08	2.79992e-07
ENSG00000151388.10	ADAMTS12	449.775	-1.69857	0.297071	-5.71772	1.07962e-08	2.83332e-07
ENSG00000155792.9	DEPTOR	723.354	-2.06257	0.360878	-5.71543	1.09427e-08	2.86748e-07
ENSG00000168824.14	NSG1	31.9231	-4.78007	0.83695	-5.71129	1.12121e-08	2.9337e-07
ENSG00000244274.7	DBNDD2	90.8109	-2.07385	0.363172	-5.71037	1.12732e-08	2.94529e-07
ENSG00000106785.14	TRIM14	41.3994	-3.74112	0.655605	-5.70636	1.1542e-08	3.01105e-07
ENSG00000187239.16	FNBP1	1878.1	-0.848712	0.148835	-5.70238	1.18147e-08	3.0776e-07
ENSG00000050628.20	PTGER3	103.386	-4.45229	0.78084	-5.70193	1.18458e-08	3.08114e-07
ENSG00000185742.6	C11orf87	26.7766	-7.18016	1.25938	-5.70136	1.18858e-08	3.08696e-07
ENSG00000166979.12	EVA1C	134.006	-2.65507	0.466258	-5.69441	1.23797e-08	3.2105e-07
ENSG00000165617.14	DACT1	1813.56	1.29387	0.22774	5.68135	1.33638e-08	3.45835e-07
ENSG00000169213.6	RAB3B	277.252	-1.2062	0.212314	-5.68121	1.33749e-08	3.45835e-07
ENSG00000115525.17	ST3GAL5	1366.97	1.0528	0.185364	5.67963	1.3499e-08	3.48532e-07
ENSG00000082126.17	MPP4	95.8964	2.4264	0.427366	5.67758	1.36615e-08	3.52211e-07
ENSG00000036565.14	SLC18A1	1674.38	1.92865	0.339853	5.67494	1.38737e-08	3.57156e-07
ENSG00000245648.1	AC022075.1	290.018	2.11427	0.373106	5.66667	1.45598e-08	3.74269e-07
ENSG00000102010.14	BMX	1134.64	-0.920112	0.162402	-5.66565	1.46469e-08	3.75903e-07
ENSG00000137198.9	GMPR	386.938	-1.38739	0.244887	-5.66542	1.46662e-08	3.75903e-07
ENSG00000137968.16	SLC44A5	196.966	-2.12882	0.375842	-5.66413	1.4777e-08	3.78192e-07
ENSG00000075240.16	GRAMD4	685.701	-0.898084	0.158612	-5.66214	1.49497e-08	3.82054e-07
ENSG00000160445.10	ZER1	2129.79	-0.945934	0.167141	-5.65951	1.51806e-08	3.87391e-07
ENSG00000071967.11	CYBRD1	545.977	-2.31343	0.408844	-5.65847	1.52733e-08	3.89191e-07
ENSG00000188580.14	NKAIN2	231.601	-1.44827	0.256452	-5.64733	1.62962e-08	4.14655e-07
ENSG00000183828.14	NUDT14	2193.5	0.858496	0.152036	5.64666	1.63593e-08	4.15658e-07
ENSG00000114790.12	ARHGEF26	323.777	2.065	0.365831	5.64468	1.65492e-08	4.19876e-07
ENSG00000131203.12	IDO1	26.8396	-6.10892	1.08251	-5.64328	1.66839e-08	4.22684e-07
ENSG00000075131.9	TIPIN	480.14	1.00731	0.178657	5.63825	1.71788e-08	4.34594e-07
ENSG00000120437.8	ACAT2	5225.25	0.650194	0.115402	5.63415	1.7592e-08	4.44406e-07
ENSG00000103888.16	CEMIP	46.3643	-3.93701	0.699922	-5.62492	1.85597e-08	4.68178e-07
ENSG00000134827.7	TCN1	26.7067	-5.38275	0.957382	-5.62236	1.88368e-08	4.74487e-07
ENSG00000102760.12	RGCC	357.035	2.36633	0.421463	5.61456	1.97059e-08	4.95667e-07
ENSG00000064300.8	NGFR	488.158	-4.44873	0.792761	-5.61169	2.00363e-08	5.03257e-07
ENSG00000183087.14	GAS6	1195.96	-1.60949	0.286845	-5.61099	2.01172e-08	5.03993e-07
ENSG00000037965.5	HOXC8	36.3292	-5.95063	1.06054	-5.61094	2.0123e-08	5.03993e-07
ENSG00000162433.14	AK4	304.923	-1.48741	0.265204	-5.60857	2.04009e-08	5.10226e-07
ENSG00000151150.21	ANK3	568.934	-1.50801	0.268956	-5.60691	2.05974e-08	5.14406e-07
ENSG00000170545.16	SMAGP	579.87	1.31001	0.233869	5.60147	2.12539e-08	5.30049e-07
ENSG00000138061.11	CYP1B1	2141.71	7.56311	1.3518	5.59484	2.20831e-08	5.49947e-07
ENSG00000197565.15	COL4A6	926.789	1.52214	0.272266	5.59065	2.26216e-08	5.6256e-07
ENSG00000166206.14	GABRB3	143.606	-1.78739	0.319761	-5.58978	2.27357e-08	5.64599e-07
ENSG00000236671.8	PRKG1-AS1	90.6823	-2.34622	0.419855	-5.58815	2.29496e-08	5.69104e-07
ENSG00000059804.15	SLC2A3	26051	-1.22142	0.218668	-5.58574	2.32708e-08	5.76256e-07
ENSG00000171867.16	PRNP	5846.98	0.975178	0.174723	5.58129	2.38743e-08	5.90368e-07
ENSG00000159713.10	TPPP3	72.1617	-2.86169	0.512753	-5.58102	2.39117e-08	5.90462e-07
ENSG00000185187.12	SIGIRR	422.598	-1.60346	0.287904	-5.56943	2.55573e-08	6.30211e-07
ENSG00000119537.17	KDSR	1749.3	-0.729461	0.13104	-5.56672	2.59574e-08	6.39178e-07
ENSG00000101577.9	LPIN2	2364.74	-1.25005	0.224646	-5.56452	2.62869e-08	6.46386e-07
ENSG00000162894.11	FCMR	108.005	3.01036	0.541505	5.55924	2.7095e-08	6.65324e-07
ENSG00000132386.10	SERPINF1	41.5566	-5.97535	1.07553	-5.55572	2.76474e-08	6.7794e-07
ENSG00000276644.4	DACH1	1379.9	-0.879968	0.158405	-5.55518	2.77322e-08	6.79071e-07
ENSG00000184304.14	PRKD1	341.638	-1.12704	0.202998	-5.55199	2.82437e-08	6.90633e-07
ENSG00000109113.19	RAB34	1059.3	-1.51151	0.272357	-5.54973	2.86113e-08	6.9865e-07
ENSG00000157833.12	GAREM2	144.048	-2.09315	0.377259	-5.54831	2.8845e-08	7.03377e-07
ENSG00000132481.6	TRIM47	1396.45	-1.17039	0.211111	-5.54397	2.95691e-08	7.20034e-07
ENSG00000138119.16	MYOF	1790.7	1.00375	0.181175	5.54024	3.02051e-08	7.34502e-07
ENSG00000176956.12	LY6H	112.515	-2.18165	0.393832	-5.53953	3.0328e-08	7.36472e-07
ENSG00000103485.17	QPRT	356.172	-2.06659	0.373546	-5.53237	3.15942e-08	7.66158e-07
ENSG00000196083.9	IL1RAP	1097.58	-1.31127	0.237151	-5.52928	3.21555e-08	7.78696e-07
ENSG00000092096.16	SLC22A17	1417.32	-1.31953	0.238887	-5.52365	3.3203e-08	8.02956e-07
ENSG00000144824.20	PHLDB2	2324.9	0.793128	0.14365	5.52124	3.36611e-08	8.12913e-07
ENSG00000163554.13	SPTA1	452.92	1.17881	0.213835	5.51272	3.53325e-08	8.52105e-07
ENSG00000140807.6	NKD1	70.7917	5.14836	0.934831	5.50726	3.64454e-08	8.7774e-07
ENSG00000106852.15	LHX6	53.9648	5.92899	1.07719	5.50415	3.70964e-08	8.92194e-07
ENSG00000148655.14	LRMDA	325.359	1.71203	0.311113	5.50291	3.73565e-08	8.97221e-07
ENSG00000139263.11	LRIG3	11673.7	-0.969479	0.176665	-5.48768	4.07244e-08	9.76774e-07
ENSG00000169855.19	ROBO1	4277.96	0.830895	0.151457	5.486	4.11127e-08	9.84741e-07
ENSG00000116774.11	OLFML3	958.103	1.58509	0.289037	5.48405	4.15698e-08	9.94335e-07
ENSG00000185352.8	HS6ST3	64.1483	-3.02332	0.551424	-5.48275	4.18756e-08	1.00029e-06
ENSG00000177706.8	FAM20C	26.5324	-6.06132	1.10561	-5.48235	4.19722e-08	1.00123e-06
ENSG00000069188.16	SDK2	40.797	-6.52976	1.19114	-5.48194	4.20692e-08	1.00218e-06
ENSG00000065357.19	DGKA	363.382	-1.10768	0.202348	-5.47412	4.39679e-08	1.046e-06
ENSG00000276386.1	CNTNAP3P2	130.841	2.05941	0.376601	5.46841	4.54101e-08	1.07884e-06
ENSG00000197380.10	DACT3	90.7636	-2.393	0.437698	-5.46725	4.57076e-08	1.08444e-06
ENSG00000198682.12	PAPSS2	2729.69	-0.772484	0.141302	-5.46692	4.57924e-08	1.08499e-06
ENSG00000176971.3	FIBIN	25.7726	-6.5143	1.19178	-5.46602	4.60252e-08	1.08903e-06
ENSG00000168487.18	BMP1	1805.05	-1.01737	0.186151	-5.46528	4.62168e-08	1.0921e-06
ENSG00000104332.11	SFRP1	1714.2	-1.44294	0.264597	-5.45336	4.94258e-08	1.16636e-06
ENSG00000121068.13	TBX2	43.7395	-5.12976	0.941174	-5.45038	5.02615e-08	1.18449e-06
ENSG00000057294.14	PKP2	695.616	-1.34034	0.245955	-5.44953	5.05024e-08	1.18857e-06
ENSG00000185215.8	TNFAIP2	224.215	-1.34397	0.246644	-5.44905	5.06396e-08	1.1902e-06
ENSG00000198369.9	SPRED2	1174.41	-0.757901	0.139259	-5.44237	5.25762e-08	1.23406e-06
ENSG00000171951.4	SCG2	80.9117	-4.2167	0.775355	-5.43841	5.37567e-08	1.26009e-06
ENSG00000111052.7	LIN7A	360.148	1.32974	0.244572	5.43703	5.41765e-08	1.26824e-06
ENSG00000213626.12	LBH	2912.48	0.840023	0.154522	5.43626	5.44097e-08	1.272e-06
ENSG00000147526.19	TACC1	10317.9	0.687508	0.126504	5.43466	5.49017e-08	1.28179e-06
ENSG00000055118.14	KCNH2	64.0619	-3.44803	0.634493	-5.43431	5.50097e-08	1.28261e-06
ENSG00000051108.14	HERPUD1	4633.63	-0.827582	0.152409	-5.42999	5.63561e-08	1.31226e-06
ENSG00000054356.13	PTPRN	58.7968	-5.27209	0.971594	-5.42623	5.75567e-08	1.33844e-06
ENSG00000159307.18	SCUBE1	1272.83	1.87209	0.345083	5.42504	5.7943e-08	1.34564e-06
ENSG00000175893.11	ZDHHC21	913.537	1.07728	0.198646	5.4231	5.85727e-08	1.35847e-06
ENSG00000161940.10	BCL6B	16686.4	0.997386	0.184036	5.41951	5.97625e-08	1.38424e-06
ENSG00000148798.10	INA	38.9386	-3.99152	0.736702	-5.41809	6.0238e-08	1.39341e-06
ENSG00000169083.16	AR	229.777	1.45976	0.26948	5.41696	6.06219e-08	1.40045e-06
ENSG00000165124.17	SVEP1	48.7146	-4.12213	0.761042	-5.41643	6.08006e-08	1.40273e-06
ENSG00000148700.14	ADD3	6342.67	0.87684	0.16195	5.41427	6.15407e-08	1.41794e-06
ENSG00000137752.23	CASP1	17.1718	-7.38265	1.36542	-5.40688	6.41337e-08	1.47575e-06
ENSG00000112559.13	MDFI	1078.96	-1.38585	0.256344	-5.40622	6.43688e-08	1.47922e-06
ENSG00000213694.4	S1PR3	912.517	-1.09073	0.201787	-5.40532	6.46937e-08	1.48474e-06
ENSG00000159176.13	CSRP1	5581.35	-0.616274	0.114028	-5.40457	6.49635e-08	1.48899e-06
ENSG00000135521.8	LTV1	1365.52	0.7471	0.138266	5.40337	6.54006e-08	1.49705e-06
ENSG00000126882.12	FAM78A	2241.58	0.774358	0.143321	5.40295	6.55524e-08	1.49857e-06
ENSG00000174807.3	CD248	570.216	-4.51818	0.836511	-5.40122	6.61891e-08	1.51116e-06
ENSG00000001617.11	SEMA3F	264.477	-2.03309	0.376599	-5.39857	6.71755e-08	1.53169e-06
ENSG00000239900.12	ADSL	5649.61	0.623535	0.11552	5.39766	6.75166e-08	1.53747e-06
ENSG00000144668.11	ITGA9	15004.3	1.15725	0.214417	5.39717	6.77002e-08	1.53965e-06
ENSG00000164220.6	F2RL2	11181.3	-1.02102	0.189237	-5.39543	6.83598e-08	1.55264e-06
ENSG00000171345.13	KRT19	1906.92	-6.04929	1.12146	-5.39411	6.88647e-08	1.56209e-06
ENSG00000144579.7	CTDSP1	421.179	-1.13495	0.210764	-5.38495	7.24656e-08	1.64165e-06
ENSG00000104765.15	BNIP3L	4023.33	-0.940376	0.174721	-5.38217	7.35931e-08	1.66504e-06
ENSG00000198355.4	PIM3	9291.08	1.32126	0.245668	5.37822	7.52242e-08	1.69757e-06
ENSG00000136026.13	CKAP4	10735.8	-0.787116	0.146347	-5.37841	7.51478e-08	1.69757e-06
ENSG00000128656.13	CHN1	854.906	1.10774	0.206004	5.37726	7.56274e-08	1.70448e-06
ENSG00000143995.19	MEIS1	2321.61	-0.830473	0.154584	-5.37232	7.77286e-08	1.74959e-06
ENSG00000255330.9	AL096711.2	37.7672	3.61603	0.673286	5.37072	7.84223e-08	1.76295e-06
ENSG00000006468.13	ETV1	493.936	-1.39021	0.258918	-5.36931	7.90396e-08	1.77455e-06
ENSG00000103653.16	CSK	1073.57	1.02568	0.191396	5.35892	8.37198e-08	1.87723e-06
ENSG00000279393.1	AL139005.1	615.85	-1.4134	0.263911	-5.3556	8.52732e-08	1.90962e-06
ENSG00000166402.8	TUB	38.2019	-6.54725	1.22379	-5.34999	8.7959e-08	1.96726e-06
ENSG00000247626.4	MARS2	1283.63	0.850634	0.159104	5.34639	8.97277e-08	2.00426e-06
ENSG00000139174.11	PRICKLE1	1521.37	-0.949906	0.177842	-5.34129	9.22896e-08	2.05887e-06
ENSG00000237149.5	ZNF503-AS2	152.503	1.69354	0.317091	5.34088	9.24975e-08	2.06089e-06
ENSG00000141505.11	ASGR1	154.175	1.67547	0.313759	5.33999	9.29494e-08	2.06571e-06
ENSG00000185745.9	IFIT1	140.947	-2.89792	0.542668	-5.34014	9.28745e-08	2.06571e-06
ENSG00000123240.16	OPTN	3364.9	1.2395	0.232193	5.33822	9.38636e-08	2.08339e-06
ENSG00000118263.14	KLF7	1337.94	-1.24762	0.233796	-5.33634	9.48436e-08	2.10249e-06
ENSG00000074370.17	ATP2A3	189.044	-2.25285	0.422257	-5.33526	9.54059e-08	2.11229e-06
ENSG00000177133.10	LINC00982	24.3236	-5.15109	0.966353	-5.33044	9.79728e-08	2.16638e-06
ENSG00000169925.16	BRD3	2706.81	-0.693573	0.130248	-5.32501	1.00947e-07	2.22934e-06
ENSG00000117318.8	ID3	13027.5	-1.01174	0.190222	-5.3187	1.0451e-07	2.30513e-06
ENSG00000133065.10	SLC41A1	3166.57	0.665846	0.125311	5.31353	1.07522e-07	2.36858e-06
ENSG00000149021.6	SCGB1A1	106.207	-2.89844	0.545587	-5.31252	1.08119e-07	2.37875e-06
ENSG00000176834.13	VSIG10	1742.6	-0.902744	0.169973	-5.3111	1.08965e-07	2.39437e-06
ENSG00000142227.10	EMP3	456.215	-1.78085	0.335351	-5.3104	1.09385e-07	2.4006e-06
ENSG00000077616.10	NAALAD2	425.529	-1.54617	0.291412	-5.30578	1.12192e-07	2.45911e-06
ENSG00000150347.15	ARID5B	366.954	-2.03966	0.384457	-5.3053	1.1249e-07	2.46258e-06
ENSG00000176871.8	WSB2	5267.91	0.699758	0.13196	5.30281	1.14032e-07	2.49322e-06
ENSG00000133216.16	EPHB2	520.28	-1.43396	0.270607	-5.29905	1.16407e-07	2.54199e-06
ENSG00000141433.12	ADCYAP1	50.6619	-4.14679	0.782738	-5.29781	1.17201e-07	2.55615e-06
ENSG00000137841.11	PLCB2	1682.42	-1.09887	0.207787	-5.28843	1.23373e-07	2.68741e-06
ENSG00000185033.14	SEMA4B	473.948	-1.16058	0.219654	-5.28368	1.26612e-07	2.75455e-06
ENSG00000277301.1	AL034550.2	91.9616	1.99019	0.376925	5.28006	1.29139e-07	2.80606e-06
ENSG00000257594.3	GALNT4	1058.21	0.764247	0.144764	5.27928	1.29696e-07	2.81468e-06
ENSG00000133026.12	MYH10	17028.2	0.619081	0.117339	5.276	1.32031e-07	2.86181e-06
ENSG00000102383.13	ZDHHC15	112.145	-1.87784	0.356424	-5.26856	1.375e-07	2.97667e-06
ENSG00000164463.12	CREBRF	481.65	-1.30714	0.248182	-5.26687	1.38769e-07	3.00046e-06
ENSG00000119772.16	DNMT3A	3031.12	0.679798	0.129082	5.2664	1.39122e-07	3.00439e-06
ENSG00000144724.19	PTPRG	6116.01	-1.04533	0.198512	-5.26584	1.39547e-07	3.00987e-06
ENSG00000051128.18	HOMER3	4326.26	1.48788	0.282749	5.2622	1.42341e-07	3.06636e-06
ENSG00000158555.14	GDPD5	8122.35	0.976375	0.185648	5.25927	1.44626e-07	3.11177e-06
ENSG00000105825.12	TFPI2	4228	-1.54914	0.294606	-5.25835	1.45354e-07	3.12361e-06
ENSG00000120306.10	CYSTM1	2348.8	1.10549	0.210296	5.25683	1.46559e-07	3.14565e-06
ENSG00000109501.13	WFS1	5285.47	1.40356	0.267129	5.25424	1.4864e-07	3.18641e-06
ENSG00000172830.12	SSH3	21.7517	-5.03828	0.960083	-5.24776	1.53964e-07	3.29651e-06
ENSG00000235655.3	H3F3AP4	2610.51	-0.693007	0.132068	-5.24736	1.54293e-07	3.29954e-06
ENSG00000081923.13	ATP8B1	2875.59	-1.14575	0.218438	-5.24521	1.56108e-07	3.33429e-06
ENSG00000087116.15	ADAMTS2	34.372	-6.35596	1.21218	-5.2434	1.57647e-07	3.36307e-06
ENSG00000267519.6	AC020916.1	224.599	-1.48235	0.28276	-5.24244	1.58466e-07	3.37643e-06
ENSG00000143549.19	TPM3	38324.8	0.581923	0.11109	5.2383	1.62058e-07	3.44879e-06
ENSG00000100612.13	DHRS7	2509.38	0.689698	0.131713	5.23636	1.63772e-07	3.48104e-06
ENSG00000164107.8	HAND2	51.998	-3.94083	0.754392	-5.22385	1.75241e-07	3.72032e-06
ENSG00000155189.11	AGPAT5	5514.41	0.617386	0.11833	5.2175	1.81351e-07	3.84538e-06
ENSG00000018236.14	CNTN1	21.868	-6.01419	1.1529	-5.21658	1.82255e-07	3.85989e-06
ENSG00000237125.9	HAND2-AS1	32.4221	-4.86186	0.932546	-5.21353	1.8528e-07	3.91923e-06
ENSG00000159658.10	EFCAB14	16961.6	1.29564	0.248653	5.21063	1.882e-07	3.9762e-06
ENSG00000128510.11	CPA4	388.449	-6.90491	1.32527	-5.2102	1.88642e-07	3.98075e-06
ENSG00000099860.8	GADD45B	182.429	-2.32469	0.44662	-5.20507	1.93927e-07	4.08736e-06
ENSG00000256053.7	APOPT1	1235.89	0.815574	0.156697	5.2048	1.94203e-07	4.08827e-06
ENSG00000148357.16	HMCN2	74.3796	-4.6248	0.88931	-5.20044	1.9882e-07	4.18046e-06
ENSG00000170891.10	CYTL1	48.4974	-2.66228	0.512416	-5.19555	2.04114e-07	4.28665e-06
ENSG00000103222.18	ABCC1	1297.37	-0.75162	0.14468	-5.19506	2.0465e-07	4.29276e-06
ENSG00000128567.16	PODXL	5333.31	0.922555	0.177798	5.18879	2.1167e-07	4.43471e-06
ENSG00000131067.16	GGT7	148.353	-1.72458	0.332444	-5.18757	2.13055e-07	4.4584e-06
ENSG00000138650.8	PCDH10	12407.7	-1.02405	0.197436	-5.18672	2.14028e-07	4.47343e-06
ENSG00000096060.14	FKBP5	4902.82	-0.957395	0.184713	-5.18314	2.18184e-07	4.55488e-06
ENSG00000135929.8	CYP27A1	890.322	-0.946655	0.182742	-5.18029	2.21538e-07	4.61942e-06
ENSG00000112902.11	SEMA5A	1236.66	-3.42307	0.661101	-5.17784	2.2447e-07	4.67499e-06
ENSG00000197021.8	CXorf40B	1365.31	0.732331	0.141468	5.17666	2.2589e-07	4.699e-06
ENSG00000166510.13	CCDC68	369.781	-1.87394	0.362116	-5.17498	2.27931e-07	4.73585e-06
ENSG00000151414.14	NEK7	1742.68	-0.857832	0.165812	-5.17352	2.29731e-07	4.76759e-06
ENSG00000080493.16	SLC4A4	629.765	-1.42534	0.275535	-5.173	2.30364e-07	4.7751e-06
ENSG00000185630.18	PBX1	568.248	-1.4951	0.28907	-5.17209	2.31493e-07	4.79284e-06
ENSG00000134824.13	FADS2	20924.9	0.723495	0.139967	5.16906	2.3528e-07	4.8655e-06
ENSG00000079819.18	EPB41L2	7857.64	0.712071	0.137811	5.16701	2.37869e-07	4.91325e-06
ENSG00000176463.13	SLCO3A1	2924.76	-1.19847	0.232069	-5.1643	2.41343e-07	4.97331e-06
ENSG00000130005.12	GAMT	386.354	-1.34723	0.260873	-5.16432	2.41311e-07	4.97331e-06
ENSG00000168300.13	PCMTD1	1076.33	-0.860486	0.166773	-5.15962	2.47448e-07	5.09314e-06
ENSG00000160145.15	KALRN	1049.51	0.96869	0.187799	5.15812	2.49444e-07	5.12821e-06
ENSG00000223764.2	LINC02593	16.2115	-7.14914	1.38754	-5.1524	2.57177e-07	5.281e-06
ENSG00000101290.13	CDS2	3774.05	0.77768	0.151185	5.14389	2.69114e-07	5.51966e-06
ENSG00000162711.17	NLRP3	71.7068	-2.07181	0.40296	-5.1415	2.72561e-07	5.58384e-06
ENSG00000124920.13	MYRF	188.154	-5.23772	1.01906	-5.13974	2.75118e-07	5.62966e-06
ENSG00000156587.15	UBE2L6	2102.22	-1.12474	0.21889	-5.1384	2.77092e-07	5.65687e-06
ENSG00000135272.10	MDFIC	1516.47	-0.754925	0.146917	-5.13845	2.77007e-07	5.65687e-06
ENSG00000204851.6	PNMA8B	27.1743	-3.4771	0.677428	-5.1328	2.85469e-07	5.82111e-06
ENSG00000010818.9	HIVEP2	931.575	-0.741806	0.14454	-5.13218	2.86406e-07	5.83344e-06
ENSG00000183963.18	SMTN	21300.4	1.2995	0.253228	5.13175	2.8706e-07	5.83999e-06
ENSG00000158715.5	SLC45A3	174.606	-1.39567	0.272273	-5.126	2.95956e-07	6.01399e-06
ENSG00000137070.17	IL11RA	1163.86	-1.62083	0.316373	-5.12316	3.00455e-07	6.09785e-06
ENSG00000143845.14	ETNK2	325.904	-1.49134	0.291119	-5.12279	3.01043e-07	6.09785e-06
ENSG00000176170.13	SPHK1	208.637	-1.80788	0.352912	-5.12274	3.01124e-07	6.09785e-06
ENSG00000214776.12	AC092821.1	241.587	1.60497	0.313416	5.12089	3.04104e-07	6.1511e-06
ENSG00000092820.17	EZR	10330	0.80473	0.157154	5.12065	3.0449e-07	6.15182e-06
ENSG00000205336.11	ADGRG1	1584.54	-1.30495	0.254912	-5.11923	3.0679e-07	6.19116e-06
ENSG00000101574.14	METTL4	683.068	0.916819	0.179157	5.1174	3.09769e-07	6.2441e-06
ENSG00000279127.1	AL121950.1	14.6053	7.24892	1.41704	5.11552	3.12879e-07	6.29956e-06
ENSG00000151117.8	TMEM86A	378.722	-1.3395	0.261911	-5.11432	3.14871e-07	6.3324e-06
ENSG00000198053.11	SIRPA	916.951	-1.201	0.235265	-5.10489	3.30985e-07	6.64887e-06
ENSG00000119938.8	PPP1R3C	171.175	-2.897	0.567907	-5.10119	3.37522e-07	6.77242e-06
ENSG00000136205.16	TNS3	2322.65	-0.994652	0.195027	-5.10008	3.39503e-07	6.80409e-06
ENSG00000113721.13	PDGFRB	495.133	-8.21249	1.61033	-5.09988	3.39875e-07	6.80409e-06
ENSG00000068024.16	HDAC4	744.756	0.942795	0.184882	5.09943	3.40669e-07	6.81222e-06
ENSG00000100321.14	SYNGR1	98.4994	-3.35785	0.658702	-5.09767	3.43857e-07	6.86814e-06
ENSG00000161249.20	DMKN	40.1119	-4.26142	0.836079	-5.09692	3.45232e-07	6.88777e-06
ENSG00000141098.12	GFOD2	3066.94	0.835275	0.16396	5.09437	3.49903e-07	6.97304e-06
ENSG00000160285.14	LSS	6531.6	0.761608	0.14953	5.09334	3.51802e-07	7.00292e-06
ENSG00000112936.18	C7	516.035	-1.62309	0.318788	-5.09144	3.55357e-07	7.06568e-06
ENSG00000111275.12	ALDH2	2832.96	-0.739732	0.145321	-5.09034	3.57431e-07	7.09889e-06
ENSG00000112137.17	PHACTR1	495.669	1.2154	0.238872	5.08808	3.61703e-07	7.16872e-06
ENSG00000120075.5	HOXB5	369.729	1.1677	0.229499	5.08805	3.61764e-07	7.16872e-06
ENSG00000165959.11	CLMN	57.9449	-2.73719	0.538451	-5.08344	3.70654e-07	7.33661e-06
ENSG00000197461.13	PDGFA	157.04	-1.8848	0.370819	-5.08281	3.71896e-07	7.3529e-06
ENSG00000171992.12	SYNPO	388.804	-1.52359	0.300259	-5.07425	3.89024e-07	7.68289e-06
ENSG00000132003.9	ZSWIM4	1370.7	-1.06295	0.209563	-5.0722	3.93244e-07	7.75751e-06
ENSG00000185567.6	AHNAK2	41.0138	-4.07272	0.80367	-5.06765	4.02748e-07	7.93609e-06
ENSG00000170430.9	MGMT	349.064	1.45509	0.287297	5.06475	4.08935e-07	8.04896e-06
ENSG00000131459.12	GFPT2	683.144	-1.96533	0.388145	-5.06339	4.11875e-07	8.09775e-06
ENSG00000101844.17	ATG4A	2458.34	0.700451	0.138429	5.06	4.1925e-07	8.23353e-06
ENSG00000165516.10	KLHDC2	1409.95	-0.729293	0.144173	-5.05845	4.22678e-07	8.29157e-06
ENSG00000155368.16	DBI	4404.5	0.590547	0.116781	5.05686	4.26212e-07	8.35156e-06
ENSG00000173281.4	PPP1R3B	3693	-1.58171	0.313341	-5.0479	4.46688e-07	8.74304e-06
ENSG00000159708.17	LRRC36	222.772	-1.92436	0.381468	-5.04463	4.54404e-07	8.88416e-06
ENSG00000182247.9	UBE2E2	1607.93	0.689036	0.136639	5.04274	4.58902e-07	8.95215e-06
ENSG00000148488.16	ST8SIA6	24.711	-4.73627	0.939194	-5.04291	4.58502e-07	8.95215e-06
ENSG00000122873.11	CISD1	1146.42	0.74657	0.148058	5.04243	4.59645e-07	8.9567e-06
ENSG00000106789.12	CORO2A	73.8873	-3.44075	0.682492	-5.04145	4.62025e-07	8.9931e-06
ENSG00000109689.15	STIM2	2326.76	0.760354	0.150917	5.03823	4.69853e-07	9.13534e-06
ENSG00000162654.8	GBP4	6802.95	-1.22008	0.242186	-5.03779	4.70943e-07	9.1464e-06
ENSG00000175938.6	ORAI3	1301.61	-0.91144	0.181028	-5.03481	4.78328e-07	9.27956e-06
ENSG00000134873.9	CLDN10	46.6768	-3.25845	0.647335	-5.03364	4.81263e-07	9.3262e-06
ENSG00000182580.2	EPHB3	61.6451	-2.63168	0.522951	-5.03237	4.84454e-07	9.37768e-06
ENSG00000070756.15	PABPC1	11561.5	0.631962	0.1256	5.03154	4.86549e-07	9.40787e-06
ENSG00000137880.5	GCHFR	156.643	-1.49889	0.298055	-5.02891	4.93278e-07	9.52748e-06
ENSG00000100368.13	CSF2RB	883.367	-0.869172	0.172965	-5.02515	5.0305e-07	9.69664e-06
ENSG00000128268.11	MGAT3	15.3907	-7.07503	1.40793	-5.02511	5.03141e-07	9.69664e-06
ENSG00000163171.7	CDC42EP3	7932.64	0.781487	0.155768	5.017	5.24835e-07	1.01036e-05
ENSG00000106771.12	TMEM245	3704.2	-0.670386	0.133715	-5.01355	5.34356e-07	1.02757e-05
ENSG00000151208.16	DLG5	385.185	-1.30752	0.26095	-5.01062	5.42545e-07	1.04217e-05
ENSG00000175879.8	HOXD8	130.963	1.54735	0.309193	5.00448	5.60128e-07	1.07477e-05
ENSG00000170542.5	SERPINB9	5551.52	-0.851527	0.170161	-5.00425	5.60804e-07	1.07489e-05
ENSG00000257093.6	KIAA1147	3782.84	-1.00862	0.201561	-5.00402	5.61458e-07	1.07497e-05
ENSG00000205213.13	LGR4	1825.59	-1.13006	0.225921	-5.002	5.67398e-07	1.08516e-05
ENSG00000157152.16	SYN2	83.8814	2.33028	0.466161	4.99886	5.76696e-07	1.10175e-05
ENSG00000138829.11	FBN2	2959.87	-1.24406	0.248898	-4.99827	5.78467e-07	1.10393e-05
ENSG00000138430.15	OLA1	3344.36	0.66851	0.133782	4.997	5.82296e-07	1.11003e-05
ENSG00000187210.13	GCNT1	261.263	-1.32258	0.264726	-4.99606	5.8514e-07	1.11424e-05
ENSG00000205517.12	RGL3	18.8501	-6.17559	1.23679	-4.99324	5.93749e-07	1.12941e-05
ENSG00000184611.11	KCNH7	179.936	-1.9844	0.397659	-4.99019	6.03192e-07	1.14613e-05
ENSG00000104490.17	NCALD	357.32	1.72068	0.344873	4.9893	6.05989e-07	1.1502e-05
ENSG00000197594.12	ENPP1	1260.09	-1.17889	0.236356	-4.98777	6.10793e-07	1.15807e-05
ENSG00000108039.17	XPNPEP1	6000.77	0.559593	0.112225	4.98634	6.15324e-07	1.1654e-05
ENSG00000158828.7	PINK1	3516.81	-0.711158	0.142653	-4.98521	6.1893e-07	1.16971e-05
ENSG00000108947.4	EFNB3	324.885	-1.33823	0.268436	-4.9853	6.18669e-07	1.16971e-05
ENSG00000152582.13	SPEF2	351.207	-1.54935	0.310809	-4.9849	6.19937e-07	1.17035e-05
ENSG00000162614.18	NEXN	54.1164	-4.0006	0.802869	-4.98288	6.26436e-07	1.18135e-05
ENSG00000160691.18	SHC1	11589.6	0.687695	0.138067	4.98087	6.32993e-07	1.19243e-05
ENSG00000179059.9	ZFP42	42.4282	-3.78586	0.760491	-4.97817	6.41871e-07	1.20786e-05
ENSG00000112773.15	TENT5A	504.795	-1.04617	0.210335	-4.97384	6.56405e-07	1.23389e-05
ENSG00000221955.10	SLC12A8	38.6963	-4.89122	0.984522	-4.96812	6.76053e-07	1.26946e-05
ENSG00000066382.16	MPPED2	284.124	-1.19745	0.241101	-4.96658	6.81437e-07	1.2782e-05
ENSG00000176092.15	CRYBG2	18.6407	5.1292	1.0332	4.96437	6.89235e-07	1.29145e-05
ENSG00000198771.10	RCSD1	1259.13	1.41398	0.284879	4.96344	6.92548e-07	1.29628e-05
ENSG00000152207.7	CYSLTR2	431.02	1.25301	0.252538	4.96167	6.98905e-07	1.30678e-05
ENSG00000177989.13	ODF3B	17.4673	-6.05115	1.22046	-4.95807	7.11963e-07	1.32978e-05
ENSG00000189120.4	SP6	553.623	1.04905	0.211881	4.95111	7.37908e-07	1.37678e-05
ENSG00000170458.13	CD14	638.359	-3.27964	0.662444	-4.95082	7.39008e-07	1.37736e-05
ENSG00000197586.12	ENTPD6	2897.46	0.821841	0.166071	4.94872	7.47035e-07	1.39085e-05
ENSG00000133110.14	POSTN	405.223	-2.13769	0.43205	-4.94779	7.50597e-07	1.396e-05
ENSG00000248098.11	BCKDHA	1520.12	-1.11859	0.22629	-4.94316	7.68653e-07	1.42807e-05
ENSG00000169032.9	MAP2K1	4923.89	0.850484	0.172069	4.9427	7.70488e-07	1.42996e-05
ENSG00000005882.11	PDK2	1407.69	-0.70112	0.141945	-4.93938	7.83725e-07	1.453e-05
ENSG00000196230.12	TUBB	57059.9	0.653564	0.132335	4.93871	7.86422e-07	1.45492e-05
ENSG00000140943.16	MBTPS1	8658.74	-0.71554	0.144883	-4.93875	7.86259e-07	1.45492e-05
ENSG00000028310.17	BRD9	1289.18	0.680864	0.137875	4.93827	7.8817e-07	1.45662e-05
ENSG00000178467.17	P4HTM	195.846	-1.34022	0.271434	-4.93754	7.91135e-07	1.46056e-05
ENSG00000137628.16	DDX60	373.304	-1.21801	0.246868	-4.93386	8.0622e-07	1.48685e-05
ENSG00000196998.17	WDR45	1216.17	-1.01405	0.20581	-4.92713	8.3446e-07	1.5357e-05
ENSG00000184347.14	SLIT3	1001.53	-2.86168	0.580788	-4.92724	8.34004e-07	1.5357e-05
ENSG00000186591.12	UBE2H	4632.88	-0.78327	0.15902	-4.92562	8.40936e-07	1.546e-05
ENSG00000003436.15	TFPI	109121	-0.969173	0.196791	-4.92489	8.44073e-07	1.55014e-05
ENSG00000108821.13	COL1A1	17015.3	-5.63678	1.14484	-4.92363	8.49545e-07	1.55856e-05
ENSG00000135083.15	CCNJL	1997.06	0.721945	0.146702	4.92118	8.6023e-07	1.57488e-05
ENSG00000142494.13	SLC47A1	20.3912	-4.6147	0.937687	-4.92136	8.59451e-07	1.57488e-05
ENSG00000145431.10	PDGFC	462.092	-1.00225	0.203705	-4.92009	8.65062e-07	1.58207e-05
ENSG00000104953.19	TLE6	31.3458	-4.39516	0.893654	-4.91819	8.73463e-07	1.5952e-05
ENSG00000131187.9	F12	24.8936	-3.30252	0.671508	-4.91806	8.74059e-07	1.5952e-05
ENSG00000022567.9	SLC45A4	4318.97	-0.786946	0.16002	-4.9178	8.7522e-07	1.59566e-05
ENSG00000147050.14	KDM6A	1609.68	-0.828302	0.168679	-4.91053	9.08317e-07	1.65429e-05
ENSG00000168827.14	GFM1	4527.94	0.58132	0.118393	4.9101	9.1029e-07	1.65589e-05
ENSG00000119669.4	IRF2BPL	249.314	-1.62597	0.33116	-4.90993	9.11082e-07	1.65589e-05
ENSG00000079257.7	LXN	1375.13	1.2332	0.25122	4.90883	9.16225e-07	1.66351e-05
ENSG00000135636.13	DYSF	14591.1	1.01743	0.20751	4.90306	9.43557e-07	1.71137e-05
ENSG00000145681.10	HAPLN1	10515.2	0.932605	0.190254	4.9019	9.4915e-07	1.71973e-05
ENSG00000100292.16	HMOX1	578.27	1.22006	0.248941	4.901	9.53491e-07	1.72582e-05
ENSG00000156313.13	RPGR	728.196	-1.30755	0.266844	-4.90007	9.58034e-07	1.73226e-05
ENSG00000175832.12	ETV4	1997.52	0.996989	0.203511	4.89894	9.63566e-07	1.74046e-05
ENSG00000241404.6	EGFL8	304.493	3.96959	0.810762	4.89612	9.7747e-07	1.76377e-05
ENSG00000162998.4	FRZB	2104.91	2.92413	0.597401	4.89475	9.84303e-07	1.77427e-05
ENSG00000125378.15	BMP4	509.369	-1.019	0.208255	-4.89302	9.92998e-07	1.78811e-05
ENSG00000148426.12	PROSER2	323.232	-1.24283	0.254135	-4.89044	1.00612e-06	1.80988e-05
ENSG00000259207.7	ITGB3	197.868	-2.74428	0.561374	-4.8885	1.01606e-06	1.8259e-05
ENSG00000138629.15	UBL7	2216.12	-0.668752	0.136901	-4.88493	1.03464e-06	1.85548e-05
ENSG00000150394.13	CDH8	217.212	-1.24942	0.255766	-4.88499	1.03434e-06	1.85548e-05
ENSG00000143537.13	ADAM15	9824.81	1.17808	0.241177	4.88473	1.03571e-06	1.85551e-05
ENSG00000172572.6	PDE3A	932.578	-1.43081	0.29312	-4.88131	1.05385e-06	1.88608e-05
ENSG00000026025.15	VIM	46150.4	0.850279	0.174208	4.88082	1.05645e-06	1.8888e-05
ENSG00000115963.13	RND3	918.891	-0.956833	0.196334	-4.8735	1.09636e-06	1.95816e-05
ENSG00000062038.13	CDH3	18.3168	-6.26791	1.28632	-4.87275	1.10056e-06	1.96368e-05
ENSG00000105245.9	NUMBL	153.506	-1.56986	0.322211	-4.87215	1.10388e-06	1.9676e-05
ENSG00000011422.11	PLAUR	1536.3	-1.59485	0.327616	-4.86806	1.127e-06	2.00677e-05
ENSG00000232517.2	AC112198.2	111.738	-5.66822	1.16456	-4.86727	1.13151e-06	2.01276e-05
ENSG00000141441.15	GAREM1	24.7742	-4.17877	0.859515	-4.86178	1.16335e-06	2.06729e-05
ENSG00000067057.16	PFKP	3671	-1.0821	0.222662	-4.85984	1.17482e-06	2.08557e-05
ENSG00000163430.11	FSTL1	21538.6	-0.983812	0.202523	-4.85778	1.18707e-06	2.10519e-05
ENSG00000010292.12	NCAPD2	2836.26	-0.749539	0.154329	-4.85677	1.19314e-06	2.11381e-05
ENSG00000188051.6	TMEM221	48.4795	-2.27464	0.468703	-4.85305	1.21575e-06	2.1517e-05
ENSG00000100427.15	MLC1	24.0421	-5.59988	1.15395	-4.85279	1.21734e-06	2.15234e-05
ENSG00000122824.10	NUDT10	1029.12	0.791972	0.163246	4.8514	1.2259e-06	2.1653e-05
ENSG00000072195.14	SPEG	22.9771	-4.76789	0.982912	-4.85078	1.22976e-06	2.16995e-05
ENSG00000270885.1	RASL10B	254.033	-1.63218	0.336619	-4.84875	1.2424e-06	2.19005e-05
ENSG00000105699.16	LSR	1868.84	2.61603	0.540282	4.84197	1.28561e-06	2.26393e-05
ENSG00000150764.13	DIXDC1	304.395	-1.61698	0.334292	-4.83703	1.31794e-06	2.31854e-05
ENSG00000130305.16	NSUN5	408.594	-1.09872	0.227208	-4.83576	1.3264e-06	2.33109e-05
ENSG00000164626.8	KCNK5	544.662	-2.05135	0.424327	-4.83436	1.33572e-06	2.34513e-05
ENSG00000103196.11	CRISPLD2	142.082	-3.15488	0.653122	-4.83046	1.36217e-06	2.38918e-05
ENSG00000147408.14	CSGALNACT1	8790.56	0.54915	0.113765	4.82705	1.38571e-06	2.42803e-05
ENSG00000174136.11	RGMB	1616.46	0.737972	0.152906	4.82632	1.39076e-06	2.43446e-05
ENSG00000158158.11	CNNM4	407.495	-0.973715	0.201881	-4.82321	1.41269e-06	2.47038e-05
ENSG00000183814.15	LIN9	439.96	-1.19193	0.247165	-4.82239	1.41849e-06	2.47805e-05
ENSG00000138698.14	RAP1GDS1	2439.3	0.785183	0.162871	4.82089	1.42922e-06	2.49432e-05
ENSG00000166173.10	LARP6	246.122	-1.06782	0.221552	-4.81974	1.43744e-06	2.50616e-05
ENSG00000130035.7	GALNT8	1101.91	0.907303	0.18829	4.81864	1.44543e-06	2.51759e-05
ENSG00000198168.8	SVIP	516.289	0.971472	0.201897	4.81172	1.4964e-06	2.60181e-05
ENSG00000074527.11	NTN4	615.205	-3.43569	0.714034	-4.81167	1.49674e-06	2.60181e-05
ENSG00000197757.7	HOXC6	89.6352	-1.87858	0.390448	-4.81136	1.49906e-06	2.60327e-05
ENSG00000167755.14	KLK6	726.162	-1.21917	0.253465	-4.81003	1.50905e-06	2.61803e-05
ENSG00000085117.11	CD82	5609.07	1.15543	0.240295	4.80837	1.52163e-06	2.63725e-05
ENSG00000132182.11	NUP210	118.015	-2.14085	0.446135	-4.79867	1.59721e-06	2.7655e-05
ENSG00000123136.14	DDX39A	3497.01	0.569316	0.118666	4.79762	1.60559e-06	2.77728e-05
ENSG00000147676.13	MAL2	135.214	-2.56671	0.535057	-4.79707	1.61003e-06	2.78222e-05
ENSG00000105976.14	MET	827.014	1.51806	0.31686	4.79094	1.65999e-06	2.86572e-05
ENSG00000112208.11	BAG2	209.68	-1.66318	0.347324	-4.78854	1.67996e-06	2.89736e-05
ENSG00000185551.14	NR2F2	937.98	1.46755	0.306501	4.78808	1.68383e-06	2.90117e-05
ENSG00000155926.13	SLA	94.1502	-2.29768	0.480399	-4.78286	1.72818e-06	2.97467e-05
ENSG00000171017.10	LRRC8E	25.0743	-4.77264	0.999393	-4.77554	1.79221e-06	3.08187e-05
ENSG00000072858.10	SIDT1	22.0792	-6.39748	1.34048	-4.77254	1.81915e-06	3.12513e-05
ENSG00000102172.15	SMS	20030.3	0.878055	0.184013	4.7717	1.82674e-06	3.1351e-05
ENSG00000160058.18	BSDC1	1602.07	-0.629879	0.132019	-4.77114	1.8319e-06	3.14088e-05
ENSG00000153391.15	INO80C	890.274	0.78545	0.164681	4.76954	1.84651e-06	3.16284e-05
ENSG00000227036.7	LINC00511	15.264	-6.47796	1.35925	-4.76583	1.88081e-06	3.21846e-05
ENSG00000168264.10	IRF2BP2	2207.68	-0.675635	0.141792	-4.76496	1.88891e-06	3.22917e-05
ENSG00000095739.10	BAMBI	1043.68	-1.51593	0.318339	-4.76202	1.91668e-06	3.27311e-05
ENSG00000085741.12	WNT11	63.164	-3.42446	0.719147	-4.76184	1.91834e-06	3.27311e-05
ENSG00000071859.14	FAM50A	3117.8	0.720026	0.151221	4.76143	1.92227e-06	3.27663e-05
ENSG00000264230.8	ANXA8L1	12.4298	-6.98384	1.46847	-4.75587	1.97595e-06	3.36486e-05
ENSG00000161149.12	TUBA3FP	19.0564	-4.92025	1.03479	-4.75483	1.98612e-06	3.37891e-05
ENSG00000179750.15	APOBEC3B	137.175	-1.47636	0.310578	-4.75358	1.99844e-06	3.39658e-05
ENSG00000024862.17	CCDC28A	399.568	-1.04025	0.21893	-4.75149	2.01919e-06	3.42852e-05
ENSG00000092969.11	TGFB2	437.766	-2.00612	0.422333	-4.75009	2.03324e-06	3.44904e-05
ENSG00000179981.10	TSHZ1	399.975	1.21418	0.255762	4.74732	2.06132e-06	3.49331e-05
ENSG00000164591.13	MYOZ3	321.512	-1.30772	0.275758	-4.74226	2.11346e-06	3.57822e-05
ENSG00000257315.2	ZBED6	155.484	-1.83426	0.38692	-4.74067	2.13014e-06	3.60099e-05
ENSG00000135842.16	FAM129A	73.337	-2.55793	0.539582	-4.74059	2.13102e-06	3.60099e-05
ENSG00000159164.9	SV2A	269.932	-1.92686	0.406538	-4.73967	2.14071e-06	3.61389e-05
ENSG00000120913.23	PDLIM2	485.271	-1.49072	0.314774	-4.73583	2.18156e-06	3.67931e-05
ENSG00000108479.11	GALK1	554.496	-1.27179	0.268583	-4.73519	2.18848e-06	3.68744e-05
ENSG00000081059.19	TCF7	126.078	1.47664	0.312184	4.73003	2.2449e-06	3.77888e-05
ENSG00000198286.9	CARD11	45.194	-3.94952	0.835338	-4.72805	2.26687e-06	3.8122e-05
ENSG00000117228.9	GBP1	24.0813	-5.28317	1.11789	-4.72602	2.28963e-06	3.8468e-05
ENSG00000110660.14	SLC35F2	2516.18	-0.938931	0.198688	-4.72566	2.29369e-06	3.84994e-05
ENSG00000175928.5	LRRN1	78.8221	-2.72385	0.576893	-4.72159	2.34008e-06	3.92405e-05
ENSG00000196104.10	SPOCK3	523.191	1.3402	0.283943	4.71997	2.35881e-06	3.95168e-05
ENSG00000114126.17	TFDP2	529.619	-0.925061	0.196081	-4.71774	2.38474e-06	3.99131e-05
ENSG00000134762.16	DSC3	91.8425	-6.98938	1.48158	-4.71753	2.38731e-06	3.99181e-05
ENSG00000182575.7	NXPH3	71.9436	2.61825	0.555184	4.71601	2.40514e-06	4.01779e-05
ENSG00000082438.15	COBLL1	390.517	-1.40563	0.29826	-4.71277	2.4437e-06	4.07833e-05
ENSG00000137825.10	ITPKA	53.3519	4.26415	0.90518	4.71082	2.46718e-06	4.1136e-05
ENSG00000074964.16	ARHGEF10L	142.61	-2.73358	0.580409	-4.70975	2.48023e-06	4.13145e-05
ENSG00000007944.14	MYLIP	794.923	-0.892904	0.189677	-4.70751	2.50766e-06	4.17317e-05
ENSG00000178385.14	PLEKHM3	259.087	-1.41417	0.300463	-4.70663	2.51846e-06	4.18718e-05
ENSG00000134294.13	SLC38A2	22393.4	-1.03219	0.219472	-4.70306	2.56292e-06	4.25707e-05
ENSG00000198885.9	ITPRIPL1	82.7222	1.69357	0.360223	4.70145	2.58321e-06	4.28672e-05
ENSG00000135452.9	TSPAN31	1539.59	-0.684338	0.145589	-4.70048	2.59552e-06	4.30308e-05
ENSG00000161638.10	ITGA5	101176	-0.568222	0.120916	-4.6993	2.61055e-06	4.31983e-05
ENSG00000154736.5	ADAMTS5	18.3066	-5.1958	1.10564	-4.69935	2.60988e-06	4.31983e-05
ENSG00000004776.12	HSPB6	17.4779	-5.76567	1.22747	-4.69721	2.63745e-06	4.36024e-05
ENSG00000168734.13	PKIG	4448.53	0.557889	0.118916	4.69147	2.71243e-06	4.47997e-05
ENSG00000173546.7	CSPG4	72.3834	-8.49456	1.81113	-4.69021	2.72928e-06	4.50357e-05
ENSG00000134709.10	HOOK1	158.346	-1.79464	0.382739	-4.68895	2.74611e-06	4.52708e-05
ENSG00000108984.14	MAP2K6	1124.95	0.844056	0.18004	4.68816	2.75678e-06	4.54041e-05
ENSG00000206538.8	VGLL3	36.5475	-5.44421	1.16132	-4.68794	2.75969e-06	4.54095e-05
ENSG00000177076.5	ACER2	616.058	-1.36814	0.291956	-4.68611	2.78452e-06	4.57751e-05
ENSG00000130147.15	SH3BP4	3648.02	-0.807058	0.172313	-4.68368	2.81773e-06	4.62777e-05
ENSG00000119899.12	SLC17A5	2348.51	0.594466	0.127011	4.68044	2.86254e-06	4.69698e-05
ENSG00000243646.9	IL10RB	936.326	0.685656	0.146509	4.67995	2.86949e-06	4.70398e-05
ENSG00000165029.15	ABCA1	1329.66	0.767983	0.164126	4.67923	2.87951e-06	4.716e-05
ENSG00000174804.3	FZD4	8158.51	-1.17846	0.251909	-4.67813	2.89502e-06	4.73699e-05
ENSG00000157404.15	KIT	3337.5	1.44347	0.308951	4.67217	2.98029e-06	4.87198e-05
ENSG00000111801.15	BTN3A3	19.1263	-4.47271	0.957455	-4.67145	2.99076e-06	4.88453e-05
ENSG00000257151.1	PWAR6	110.375	1.62058	0.347297	4.66628	3.06699e-06	5.00437e-05
ENSG00000108387.14	SEPT4	22.7773	-5.57485	1.19603	-4.66112	3.14486e-06	5.12668e-05
ENSG00000179627.9	ZBTB42	102.643	-1.56868	0.336583	-4.66061	3.15275e-06	5.13477e-05
ENSG00000145287.10	PLAC8	60.0581	-3.22898	0.693496	-4.65609	3.22275e-06	5.24392e-05
ENSG00000125458.6	NT5C	342.655	-1.43778	0.308836	-4.65548	3.23232e-06	5.25462e-05
ENSG00000154928.17	EPHB1	399.047	1.71708	0.368884	4.6548	3.24298e-06	5.26706e-05
ENSG00000142156.14	COL6A1	1123.78	-1.39636	0.300042	-4.65388	3.25741e-06	5.28562e-05
ENSG00000168615.11	ADAM9	4178.6	-0.970662	0.2087	-4.651	3.30328e-06	5.3551e-05
ENSG00000154359.12	LONRF1	1475.2	0.679322	0.146238	4.64532	3.39544e-06	5.49942e-05
ENSG00000184838.14	PRR16	12.8009	-6.7959	1.46369	-4.643	3.43383e-06	5.55648e-05
ENSG00000151491.13	EPS8	986.36	-0.758083	0.163298	-4.64234	3.44489e-06	5.56924e-05
ENSG00000119632.3	IFI27L2	108.772	-2.08936	0.450139	-4.64158	3.45754e-06	5.58455e-05
ENSG00000137693.13	YAP1	964.995	-0.76877	0.16567	-4.64036	3.47796e-06	5.61061e-05
ENSG00000123689.5	G0S2	22.9027	-4.48421	0.966374	-4.64024	3.48007e-06	5.61061e-05
ENSG00000114439.18	BBX	1548.36	-0.705181	0.151986	-4.63977	3.48796e-06	5.61818e-05
ENSG00000237187.8	NR2F1-AS1	185.557	-1.53216	0.330253	-4.63936	3.49495e-06	5.62428e-05
ENSG00000133433.10	GSTT2B	154.221	-1.17035	0.252287	-4.63898	3.50139e-06	5.62948e-05
ENSG00000184831.13	APOO	1406.75	1.12333	0.242239	4.63728	3.53028e-06	5.67073e-05
ENSG00000166750.9	SLFN5	1571.52	-0.820858	0.177055	-4.63618	3.549e-06	5.6956e-05
ENSG00000118640.10	VAMP8	2776.53	1.00945	0.217863	4.63341	3.597e-06	5.76289e-05
ENSG00000204161.13	TMEM273	475.166	-0.983134	0.212185	-4.63338	3.5975e-06	5.76289e-05
ENSG00000150867.13	PIP4K2A	1579.47	0.636402	0.137414	4.63129	3.63395e-06	5.81598e-05
ENSG00000198003.11	CCDC151	25.3106	-3.55092	0.766897	-4.63024	3.65235e-06	5.8401e-05
ENSG00000129116.18	PALLD	3347.79	-0.841624	0.181838	-4.62843	3.68444e-06	5.88606e-05
ENSG00000182732.17	RGS6	571.757	-1.0855	0.234603	-4.62699	3.71022e-06	5.92185e-05
ENSG00000142039.3	CCDC97	968.304	0.797665	0.172473	4.62487	3.74825e-06	5.97711e-05
ENSG00000068028.17	RASSF1	1269.61	0.842387	0.182284	4.62128	3.81373e-06	6.07601e-05
ENSG00000122863.5	CHST3	475.764	-1.42105	0.307654	-4.61899	3.85604e-06	6.13784e-05
ENSG00000006576.16	PHTF2	706.456	-0.759163	0.164416	-4.61732	3.88728e-06	6.18197e-05
ENSG00000164284.14	GRPEL2	1512.77	0.710545	0.153933	4.61594	3.91319e-06	6.21755e-05
ENSG00000204681.10	GABBR1	30.9035	-3.6589	0.793049	-4.61372	3.95528e-06	6.27874e-05
ENSG00000102007.10	PLP2	120.555	-1.61424	0.350232	-4.60906	4.04489e-06	6.41519e-05
ENSG00000081189.15	MEF2C	7149.45	0.734498	0.159417	4.60741	4.07719e-06	6.45476e-05
ENSG00000187688.14	TRPV2	407.427	-1.24436	0.270068	-4.60757	4.074e-06	6.45476e-05
ENSG00000144810.15	COL8A1	463.085	-4.5598	0.989824	-4.60668	4.09146e-06	6.47151e-05
ENSG00000197081.13	IGF2R	10624.9	0.60701	0.1318	4.60554	4.11403e-06	6.50135e-05
ENSG00000165072.9	MAMDC2	167.424	-1.71431	0.372347	-4.60407	4.14309e-06	6.54139e-05
ENSG00000164465.18	DCBLD1	6298.68	0.575257	0.124998	4.60214	4.18181e-06	6.59067e-05
ENSG00000075426.11	FOSL2	2732.94	-0.828015	0.179916	-4.60223	4.17985e-06	6.59067e-05
ENSG00000151914.19	DST	2439.36	-0.838991	0.182323	-4.60168	4.19097e-06	6.59918e-05
ENSG00000099953.9	MMP11	325.132	-1.47103	0.319848	-4.59915	4.24226e-06	6.67396e-05
ENSG00000166888.11	STAT6	1889.79	-0.640544	0.139307	-4.59809	4.2639e-06	6.702e-05
ENSG00000178685.13	PARP10	204.594	-1.42543	0.310055	-4.59734	4.27925e-06	6.72011e-05
ENSG00000133256.12	PDE6B	130.552	-1.60723	0.349616	-4.59713	4.28346e-06	6.72071e-05
ENSG00000164331.9	ANKRA2	302.056	-0.97002	0.21103	-4.5966	4.29436e-06	6.73179e-05
ENSG00000067082.14	KLF6	14281	0.628147	0.13677	4.59273	4.37484e-06	6.85183e-05
ENSG00000117707.15	PROX1	208.695	1.61044	0.350815	4.59055	4.4207e-06	6.91749e-05
ENSG00000204054.13	LINC00963	419.688	-1.10883	0.241571	-4.59009	4.43057e-06	6.92676e-05
ENSG00000185090.14	MANEAL	50.9306	-2.48204	0.540775	-4.58978	4.43713e-06	6.93084e-05
ENSG00000103647.12	CORO2B	867.084	1.59863	0.348506	4.58708	4.49479e-06	7.01467e-05
ENSG00000109929.9	SC5D	5433.76	-0.72376	0.15785	-4.58512	4.53727e-06	7.07468e-05
ENSG00000138185.19	ENTPD1	5324.63	-1.10172	0.240333	-4.58415	4.55834e-06	7.10123e-05
ENSG00000157653.11	C9orf43	184.411	1.09215	0.238263	4.58378	4.56634e-06	7.10738e-05
ENSG00000162337.11	LRP5	1232.16	1.31278	0.286537	4.58154	4.61557e-06	7.17765e-05
ENSG00000183049.12	CAMK1D	85.4695	-2.03583	0.444568	-4.57934	4.66444e-06	7.24722e-05
ENSG00000048740.18	CELF2	1689.03	1.53615	0.335491	4.57882	4.676e-06	7.25875e-05
ENSG00000189152.10	GRAPL	84.4517	1.54448	0.337421	4.57732	4.70981e-06	7.30478e-05
ENSG00000163393.12	SLC22A15	158.521	-1.38512	0.302777	-4.57473	4.76825e-06	7.38889e-05
ENSG00000125675.17	GRIA3	20.8927	-4.78916	1.04704	-4.57401	4.78484e-06	7.40806e-05
ENSG00000111859.16	NEDD9	1958.28	0.960757	0.210182	4.57107	4.85233e-06	7.50594e-05
ENSG00000149201.9	CCDC81	38.167	-4.80731	1.05176	-4.57075	4.85983e-06	7.51092e-05
ENSG00000138413.13	IDH1	8188.5	0.655427	0.14351	4.56712	4.9448e-06	7.62211e-05
ENSG00000197620.10	CXorf40A	494.839	0.930418	0.203719	4.56717	4.94365e-06	7.62211e-05
ENSG00000277147.5	LINC00869	75.5836	-1.89681	0.415309	-4.56722	4.9423e-06	7.62211e-05
ENSG00000119655.10	NPC2	5056.08	0.641456	0.14046	4.56683	4.95161e-06	7.62591e-05
ENSG00000183111.11	ARHGEF37	137.847	1.97777	0.433388	4.56351	5.03063e-06	7.74082e-05
ENSG00000172893.15	DHCR7	8618.2	0.594808	0.130353	4.56306	5.04135e-06	7.75052e-05
ENSG00000109458.8	GAB1	1348.4	0.739231	0.162072	4.56111	5.08828e-06	7.81583e-05
ENSG00000186472.19	PCLO	68.4861	2.18489	0.479084	4.56056	5.1018e-06	7.82975e-05
ENSG00000189171.14	S100A13	1040.05	-1.02044	0.22401	-4.55533	5.23031e-06	8.01996e-05
ENSG00000225889.7	AC012368.1	36.3011	3.10118	0.68086	4.5548	5.24349e-06	8.03316e-05
ENSG00000255508.7	AP002990.1	723.447	1.2207	0.268214	4.55122	5.33361e-06	8.16409e-05
ENSG00000163041.9	H3F3A	11732.6	-0.530355	0.116536	-4.55101	5.33899e-06	8.16521e-05
ENSG00000042286.14	AIFM2	66.8211	-2.4422	0.536685	-4.55054	5.35095e-06	8.17638e-05
ENSG00000243137.7	PSG4	23.3364	-6.27817	1.38024	-4.54862	5.3999e-06	8.24401e-05
ENSG00000120708.16	TGFBI	3369.45	-3.85363	0.847873	-4.54506	5.49197e-06	8.37729e-05
ENSG00000171840.11	NINJ2	158.309	-1.7877	0.393593	-4.54201	5.57206e-06	8.49207e-05
ENSG00000124813.21	RUNX2	51.3778	-2.96727	0.653566	-4.54013	5.62205e-06	8.56083e-05
ENSG00000164129.11	NPY5R	115.212	1.67028	0.36803	4.53844	5.66707e-06	8.62191e-05
ENSG00000104763.18	ASAH1	10692.8	0.855739	0.18865	4.53612	5.72998e-06	8.70253e-05
ENSG00000133398.3	MED10	1391.81	0.627878	0.138414	4.53622	5.72712e-06	8.70253e-05
ENSG00000204882.3	GPR20	16.4822	-6.65549	1.46848	-4.53224	5.83621e-06	8.85621e-05
ENSG00000086062.12	B4GALT1	1868.25	-0.639137	0.141029	-4.53195	5.84408e-06	8.86049e-05
ENSG00000197119.12	SLC25A29	1133.57	0.927787	0.20473	4.53176	5.84937e-06	8.86086e-05
ENSG00000183020.13	AP2A2	4160.28	0.806532	0.178003	4.531	5.8706e-06	8.87771e-05
ENSG00000173193.14	PARP14	2808.51	-0.828345	0.182816	-4.53104	5.86944e-06	8.87771e-05
ENSG00000185507.20	IRF7	200.872	-1.24012	0.273853	-4.52842	5.94251e-06	8.97872e-05
ENSG00000182013.17	PNMA8A	611.837	-0.985833	0.21808	-4.52051	6.16907e-06	9.31301e-05
ENSG00000116663.10	FBXO6	47.6626	-2.10789	0.466383	-4.51965	6.19421e-06	9.34294e-05
ENSG00000105514.7	RAB3D	2921.15	0.725817	0.160669	4.51745	6.25876e-06	9.43219e-05
ENSG00000112159.11	MDN1	993.482	0.678501	0.150272	4.51517	6.32673e-06	9.52645e-05
ENSG00000163219.11	ARHGAP25	63.0296	3.06302	0.678705	4.51304	6.39051e-06	9.61424e-05
ENSG00000143320.8	CRABP2	215.434	-9.81889	2.17585	-4.51268	6.40139e-06	9.62237e-05
ENSG00000152990.13	ADGRA3	1455.51	-0.755679	0.167539	-4.51046	6.4686e-06	9.71507e-05
ENSG00000027075.14	PRKCH	5337.48	0.795071	0.176343	4.50865	6.52406e-06	9.7852e-05
ENSG00000163346.16	PBXIP1	2267.59	-0.762322	0.169083	-4.50858	6.52644e-06	9.7852e-05
ENSG00000154122.13	ANKH	527.018	0.932374	0.206968	4.50492	6.6397e-06	9.94652e-05
ENSG00000109705.7	NKX3-2	21.3126	-4.90468	1.08898	-4.50391	6.67153e-06	9.98569e-05
ENSG00000251273.3	LINC02228	38.957	-2.46022	0.546401	-4.5026	6.71279e-06	0.000100389
ENSG00000105270.14	CLIP3	766.883	-0.757253	0.168191	-4.50233	6.72119e-06	0.000100429
ENSG00000042493.15	CAPG	598.802	-1.15322	0.256197	-4.5013	6.75406e-06	0.000100834
ENSG00000111907.20	TPD52L1	290.965	-1.03578	0.230453	-4.49454	6.97213e-06	0.000104001
ENSG00000183888.4	SRARP	16.0028	5.72308	1.27391	4.49254	7.03798e-06	0.000104864
ENSG00000161999.11	JMJD8	1366.64	-0.770785	0.171575	-4.49242	7.04187e-06	0.000104864
ENSG00000074201.8	CLNS1A	1828.68	-0.610114	0.135841	-4.4914	7.07577e-06	0.000105279
ENSG00000172765.17	TMCC1	676.34	0.774338	0.172446	4.49033	7.11128e-06	0.000105718
ENSG00000110442.11	COMMD9	3009.53	0.569124	0.126752	4.49007	7.11988e-06	0.000105756
ENSG00000137547.8	MRPL15	3105.93	0.543356	0.121131	4.4857	7.26766e-06	0.00010786
ENSG00000141338.13	ABCA8	44.0327	4.44387	0.990795	4.48516	7.28609e-06	0.000108042
ENSG00000133321.10	RARRES3	12.8241	-6.60759	1.47336	-4.48472	7.30106e-06	0.000108173
ENSG00000121858.10	TNFSF10	2313.05	-0.886325	0.197754	-4.48195	7.39633e-06	0.000109492
ENSG00000175482.8	POLD4	1042.81	-1.21467	0.271086	-4.48075	7.43808e-06	0.000110017
ENSG00000075420.12	FNDC3B	10134.2	-0.794622	0.177559	-4.47525	7.63228e-06	0.000112795
ENSG00000021355.12	SERPINB1	694.047	-0.827039	0.184814	-4.47498	7.64194e-06	0.000112842
ENSG00000131389.17	SLC6A6	814.683	-0.96166	0.214908	-4.47475	7.65006e-06	0.000112867
ENSG00000138685.15	FGF2	951.052	0.897984	0.200706	4.47412	7.67252e-06	0.000113016
ENSG00000149177.12	PTPRJ	35.8272	-4.34549	0.971253	-4.47411	7.67304e-06	0.000113016
ENSG00000129596.4	CDO1	237.767	-1.20443	0.269226	-4.47366	7.68918e-06	0.000113159
ENSG00000100364.18	KIAA0930	125.778	-1.4929	0.334023	-4.46946	7.84178e-06	0.000115308
ENSG00000229989.3	MIR181A1HG	214.1	-1.61045	0.360433	-4.4681	7.89159e-06	0.000115944
ENSG00000150403.17	TMCO3	3557.09	-0.625286	0.140005	-4.46617	7.96313e-06	0.000116897
ENSG00000128274.16	A4GALT	68.8682	-2.30816	0.516894	-4.46544	7.99042e-06	0.000117199
ENSG00000248890.1	HHIP-AS1	14.8656	-5.4593	1.22265	-4.46514	8.00154e-06	0.000117265
ENSG00000060138.12	YBX3	18300.8	-0.743725	0.166664	-4.46242	8.10385e-06	0.000118665
ENSG00000233355.6	CHRM3-AS2	19.8217	-5.41298	1.21328	-4.46143	8.1413e-06	0.000119114
ENSG00000267414.1	AC120049.1	103.677	-1.46966	0.329666	-4.45803	8.27155e-06	0.000120919
ENSG00000141298.18	SSH2	1136.09	0.904889	0.203031	4.45689	8.31555e-06	0.000121461
ENSG00000253304.1	TMEM200B	136.416	-5.44218	1.22133	-4.45596	8.35187e-06	0.00012189
ENSG00000263155.5	MYZAP	1188.87	0.673308	0.151215	4.45265	8.48154e-06	0.00012368
ENSG00000100889.11	PCK2	328.767	-1.06199	0.238547	-4.45194	8.50997e-06	0.000123991
ENSG00000099954.18	CECR2	101.555	-1.44806	0.325366	-4.45057	8.56437e-06	0.000124577
ENSG00000127472.10	PLA2G5	80.1763	-8.0911	1.81793	-4.45073	8.55791e-06	0.000124577
ENSG00000033627.16	ATP6V0A1	5129.85	0.593033	0.133287	4.44931	8.61485e-06	0.000125208
ENSG00000180448.10	ARHGAP45	561.886	1.39333	0.31318	4.44899	8.62749e-06	0.000125288
ENSG00000118960.12	HS1BP3	2115.05	0.639204	0.143718	4.44764	8.68182e-06	0.000125972
ENSG00000196517.11	SLC6A9	35.9277	-3.08609	0.693954	-4.44711	8.70328e-06	0.00012618
ENSG00000274516.2	FAM74A6	14.8475	5.22136	1.17479	4.44449	8.81009e-06	0.000127518
ENSG00000198108.3	CHSY3	1884.95	-1.26885	0.285479	-4.44462	8.80465e-06	0.000127518
ENSG00000176771.16	NCKAP5	145.98	-2.1253	0.478214	-4.44424	8.82033e-06	0.000127561
ENSG00000142949.16	PTPRF	2409.2	-1.08991	0.245257	-4.44397	8.83128e-06	0.000127614
ENSG00000163516.13	ANKZF1	581.054	-0.781103	0.175918	-4.44015	8.98976e-06	0.000129797
ENSG00000132824.13	SERINC3	8803.56	-0.54723	0.123273	-4.43917	9.03045e-06	0.000130277
ENSG00000140750.16	ARHGAP17	4367.14	0.525479	0.118392	4.43848	9.05959e-06	0.000130591
ENSG00000163818.16	LZTFL1	556.877	-0.813973	0.183417	-4.43783	9.08721e-06	0.000130881
ENSG00000163249.11	CCNYL1	979.184	0.886905	0.199871	4.43738	9.10589e-06	0.000131043
ENSG00000105852.10	PON3	33.8763	3.45557	0.778815	4.43696	9.12383e-06	0.000131193
ENSG00000126337.13	KRT36	20.403	4.96371	1.11986	4.43245	9.31703e-06	0.000133795
ENSG00000064687.12	ABCA7	180.488	-1.7793	0.401432	-4.43238	9.31999e-06	0.000133795
ENSG00000172216.5	CEBPB	804.392	-1.25666	0.283716	-4.42929	9.45431e-06	0.000135612
ENSG00000177370.4	TIMM22	3479.13	0.558071	0.1261	4.42561	9.61711e-06	0.000137835
ENSG00000284634.1	AC092821.3	149.918	1.40002	0.316411	4.42468	9.65844e-06	0.000138314
ENSG00000170522.9	ELOVL6	1739.11	0.686611	0.155226	4.42331	9.71997e-06	0.000139082
ENSG00000137843.11	PAK6	12.9368	-6.21609	1.40583	-4.42164	9.79557e-06	0.00014005
ENSG00000160213.7	CSTB	6144.54	0.65405	0.147938	4.42111	9.81938e-06	0.000140276
ENSG00000113742.12	CPEB4	321.289	0.940248	0.212733	4.41985	9.877e-06	0.000140984
ENSG00000107562.16	CXCL12	19.0486	-5.0958	1.15323	-4.41871	9.92921e-06	0.000141614
ENSG00000187244.11	BCAM	246.832	-1.61519	0.365604	-4.41786	9.96829e-06	0.000142056
ENSG00000114529.12	C3orf52	86.2775	-2.06509	0.467462	-4.41767	9.97715e-06	0.000142067
ENSG00000113805.8	CNTN3	37.8004	-4.24789	0.96205	-4.41546	1.00795e-05	0.000143408
ENSG00000185650.9	ZFP36L1	8463.94	0.710069	0.160851	4.41446	1.0126e-05	0.000143953
ENSG00000130741.10	EIF2S3	7460.69	0.570177	0.129303	4.40964	1.03544e-05	0.000147081
ENSG00000188706.12	ZDHHC9	6160.99	0.622605	0.141238	4.40819	1.04238e-05	0.000147947
ENSG00000178585.14	CTNNBIP1	2871.89	1.02736	0.233321	4.4032	1.06666e-05	0.000151149
ENSG00000198915.11	RASGEF1A	18.1	-6.15209	1.39718	-4.40321	1.06661e-05	0.000151149
ENSG00000221926.12	TRIM16	4801.54	2.7633	0.627844	4.40124	1.07632e-05	0.000152395
ENSG00000156521.13	TYSND1	513.946	-1.1811	0.268527	-4.39845	1.09027e-05	0.000154246
ENSG00000133019.11	CHRM3	232.644	1.87146	0.425499	4.39826	1.09121e-05	0.000154254
ENSG00000273706.4	LHX1	16.687	-5.70857	1.29823	-4.39719	1.09663e-05	0.000154895
ENSG00000163710.8	PCOLCE2	15.9892	-4.89389	1.1133	-4.39583	1.10352e-05	0.000155744
ENSG00000186684.12	CYP27C1	65.9624	-2.53102	0.575805	-4.39562	1.10457e-05	0.000155766
ENSG00000078596.10	ITM2A	1329.95	2.44366	0.556258	4.39304	1.11778e-05	0.000157503
ENSG00000085998.13	POMGNT1	3097.04	-0.614142	0.139812	-4.39261	1.11997e-05	0.000157685
ENSG00000159784.17	FAM131B	46.1938	-2.21453	0.504867	-4.38636	1.15263e-05	0.000162023
ENSG00000090104.11	RGS1	12.8313	-6.15037	1.4021	-4.38653	1.15174e-05	0.000162023
ENSG00000120875.8	DUSP4	1981.2	0.885253	0.201841	4.3859	1.15506e-05	0.000162236
ENSG00000165071.14	TMEM71	119.733	1.86246	0.42528	4.37937	1.19022e-05	0.000167041
ENSG00000058056.8	USP13	1120.86	0.824269	0.188271	4.37809	1.19725e-05	0.000167892
ENSG00000183307.3	TMEM121B	245.224	-1.2077	0.27609	-4.37429	1.21827e-05	0.000170704
ENSG00000183908.5	LRRC55	67.4307	3.15582	0.721796	4.37218	1.23014e-05	0.00017223
ENSG00000011258.15	MBTD1	262.575	-1.13233	0.258999	-4.37193	1.23154e-05	0.000172288
ENSG00000115380.19	EFEMP1	13796.3	-3.02204	0.691577	-4.36977	1.24375e-05	0.000173858
ENSG00000076770.14	MBNL3	359.127	0.957784	0.219305	4.36737	1.25753e-05	0.000175644
ENSG00000255248.8	MIR100HG	175.858	-1.60395	0.367293	-4.36694	1.25997e-05	0.000175845
ENSG00000122986.13	HVCN1	172.494	-1.25543	0.287757	-4.3628	1.28407e-05	0.000179066
ENSG00000168116.13	KIAA1586	834.906	0.649181	0.14884	4.36159	1.2912e-05	0.000179726
ENSG00000105968.18	H2AFV	2336.39	-0.671302	0.153916	-4.36148	1.29187e-05	0.000179726
ENSG00000147459.17	DOCK5	79.6017	-1.86071	0.42662	-4.3615	1.29171e-05	0.000179726
ENSG00000106366.8	SERPINE1	12570.8	-2.56477	0.588115	-4.361	1.29472e-05	0.00017998
ENSG00000095752.6	IL11	26.9915	-3.80439	0.872729	-4.35919	1.30547e-05	0.00018124
ENSG00000146477.5	SLC22A3	10.444	-6.69715	1.53635	-4.35912	1.30585e-05	0.00018124
ENSG00000118596.11	SLC16A7	232.745	0.962897	0.220948	4.35803	1.31239e-05	0.000182003
ENSG00000229647.1	MYOSLID	11.1538	-6.61762	1.51975	-4.35441	1.33427e-05	0.000184892
ENSG00000144749.13	LRIG1	1957.53	-0.720019	0.165615	-4.34755	1.37668e-05	0.000190618
ENSG00000137936.17	BCAR3	2485.93	-1.1024	0.253642	-4.34626	1.38475e-05	0.000191434
ENSG00000126603.8	GLIS2	21.5189	-3.17349	0.730162	-4.34628	1.38469e-05	0.000191434
ENSG00000141384.12	TAF4B	156.129	-1.24471	0.286413	-4.34587	1.38726e-05	0.000191629
ENSG00000165810.16	BTNL9	733.264	-1.49986	0.345775	-4.33769	1.43988e-05	0.000198743
ENSG00000177108.5	ZDHHC22	46.4248	-2.22122	0.512111	-4.33739	1.44184e-05	0.000198856
ENSG00000107984.9	DKK1	8762.89	-2.82492	0.651559	-4.33562	1.45348e-05	0.000200304
ENSG00000147027.3	TMEM47	1856.36	-0.70607	0.162931	-4.33356	1.46718e-05	0.000202034
ENSG00000137033.11	IL33	480.491	-7.46836	1.72376	-4.3326	1.47356e-05	0.000202753
ENSG00000140563.14	MCTP2	258.99	1.42344	0.328736	4.33004	1.49079e-05	0.000204964
ENSG00000043143.20	JADE2	43.4878	-3.1482	0.727103	-4.32979	1.49251e-05	0.000205039
ENSG00000204634.12	TBC1D8	1702.96	0.753687	0.174078	4.32958	1.49392e-05	0.000205073
ENSG00000144730.17	IL17RD	783.618	2.92481	0.675658	4.32884	1.49898e-05	0.000205607
ENSG00000050438.16	SLC4A8	104.069	-2.16361	0.500018	-4.32707	1.51103e-05	0.000207097
ENSG00000108424.9	KPNB1	5062.27	0.522356	0.120846	4.32251	1.54267e-05	0.000211268
ENSG00000134954.14	ETS1	6967.66	0.537423	0.124354	4.32171	1.54824e-05	0.000211454
ENSG00000225194.3	LINC00092	55.7796	3.39181	0.784845	4.32163	1.54884e-05	0.000211454
ENSG00000139146.13	SINHCAF	6456.91	-0.650151	0.150425	-4.3221	1.54552e-05	0.000211454
ENSG00000148842.17	CNNM2	170.213	-1.60944	0.372411	-4.32169	1.54839e-05	0.000211454
ENSG00000153551.13	CMTM7	1548.84	0.759632	0.175801	4.32098	1.55334e-05	0.000211752
ENSG00000149212.11	SESN3	1070.73	0.984766	0.227904	4.32097	1.55343e-05	0.000211752
ENSG00000164330.16	EBF1	845.371	1.17162	0.271194	4.32021	1.55878e-05	0.000212315
ENSG00000145198.14	VWA5B2	17.5454	4.81071	1.11462	4.316	1.58885e-05	0.000216243
ENSG00000085831.15	TTC39A	235.761	1.27028	0.294419	4.31454	1.59937e-05	0.000217507
ENSG00000108691.9	CCL2	8814.66	4.34961	1.00824	4.31407	1.60276e-05	0.000217799
ENSG00000086289.11	EPDR1	387.358	-1.0424	0.241787	-4.31122	1.62354e-05	0.000220452
ENSG00000183853.17	KIRREL1	2211.12	-0.959602	0.222679	-4.30935	1.63732e-05	0.000222152
ENSG00000156466.9	GDF6	203.659	-5.66391	1.31463	-4.30836	1.64466e-05	0.000222976
ENSG00000003137.8	CYP26B1	2088.07	-2.68781	0.624153	-4.30633	1.65987e-05	0.000224864
ENSG00000024422.11	EHD2	6677.53	-0.938113	0.217926	-4.30473	1.67192e-05	0.000226321
ENSG00000162551.13	ALPL	16.9276	-4.10056	0.952959	-4.30298	1.68517e-05	0.000227939
ENSG00000107821.14	KAZALD1	29.4199	-2.97468	0.691835	-4.29969	1.71039e-05	0.000231172
ENSG00000137962.12	ARHGAP29	11813.4	0.952205	0.221489	4.29912	1.7148e-05	0.000231591
ENSG00000145996.11	CDKAL1	1442.45	0.686359	0.159704	4.2977	1.72581e-05	0.000232541
ENSG00000142694.6	EVA1B	617.794	-1.20486	0.280339	-4.29788	1.72441e-05	0.000232541
ENSG00000116329.10	OPRD1	19.8072	-3.97713	0.925408	-4.2977	1.7258e-05	0.000232541
ENSG00000172183.14	ISG20	119.838	-1.87409	0.436167	-4.29673	1.7334e-05	0.000233384
ENSG00000159228.12	CBR1	337.293	-1.20632	0.280944	-4.29381	1.75634e-05	0.000236292
ENSG00000103460.16	TOX3	13.0882	5.31789	1.23861	4.29344	1.75928e-05	0.000236505
ENSG00000171223.5	JUNB	4080.88	-0.70333	0.16393	-4.29042	1.78337e-05	0.000239561
ENSG00000148498.15	PARD3	1089.77	-0.846187	0.197239	-4.29016	1.78545e-05	0.000239656
ENSG00000142549.9	IGLON5	69.4481	-2.05724	0.479549	-4.28995	1.78711e-05	0.000239697
ENSG00000154188.9	ANGPT1	267.672	-1.86394	0.434562	-4.28925	1.79281e-05	0.000240278
ENSG00000173442.12	EHBP1L1	65.3857	-2.09415	0.488411	-4.28767	1.80557e-05	0.000241803
ENSG00000223865.10	HLA-DPB1	108.44	-1.73793	0.40536	-4.28737	1.80798e-05	0.000241942
ENSG00000166347.18	CYB5A	1280.28	0.728307	0.170014	4.2838	1.83729e-05	0.000245676
ENSG00000138660.11	AP1AR	2104.4	0.577055	0.134741	4.28269	1.84648e-05	0.000246718
ENSG00000101384.12	JAG1	11260.8	-1.18008	0.275673	-4.28073	1.8628e-05	0.000248709
ENSG00000163453.11	IGFBP7	363.031	-1.94889	0.455407	-4.27944	1.87366e-05	0.000249969
ENSG00000102996.4	MMP15	2003.27	0.802223	0.187475	4.27909	1.8766e-05	0.000250171
ENSG00000145014.17	TMEM44	1030.04	0.702626	0.164228	4.27835	1.88282e-05	0.00025081
ENSG00000136045.11	PWP1	3118.49	0.525973	0.123006	4.27601	1.90271e-05	0.000253266
ENSG00000260807.6	AC009041.2	134.824	-1.26245	0.295293	-4.27526	1.90912e-05	0.000253851
ENSG00000243056.1	EIF4EBP3	37.6416	-2.96285	0.693038	-4.27516	1.90999e-05	0.000253851
ENSG00000141699.10	RETREG3	4535.02	-0.52585	0.123091	-4.27204	1.93692e-05	0.000257041
ENSG00000197506.7	SLC28A3	11.8448	-6.45757	1.51154	-4.27217	1.93579e-05	0.000257041
ENSG00000189143.9	CLDN4	16.0881	-5.18284	1.21373	-4.27018	1.95315e-05	0.000258999
ENSG00000187720.14	THSD4	240.366	-1.05982	0.24832	-4.26795	1.97281e-05	0.000261408
ENSG00000151176.7	PLBD2	1813.76	0.615811	0.144343	4.26631	1.98732e-05	0.000263133
ENSG00000106049.8	HIBADH	1234.19	-0.683127	0.160199	-4.26424	2.00581e-05	0.000265381
ENSG00000271474.1	AC106881.1	34.6099	-3.16897	0.744564	-4.25615	2.0798e-05	0.000274963
ENSG00000112576.12	CCND3	2432.93	-0.810084	0.190342	-4.25594	2.08174e-05	0.000275013
ENSG00000088992.17	TESC	44.197	-4.45597	1.04707	-4.25567	2.08421e-05	0.000275132
ENSG00000182796.14	TMEM198B	162.921	-1.05568	0.248331	-4.25112	2.12706e-05	0.000280577
ENSG00000176320.2	AL138899.1	17.8718	3.80365	0.894818	4.25076	2.13047e-05	0.000280816
ENSG00000204574.12	ABCF1	3484.85	0.565207	0.132989	4.25002	2.1375e-05	0.00028153
ENSG00000138670.17	RASGEF1B	355.407	-5.27063	1.24068	-4.2482	2.15499e-05	0.000283621
ENSG00000138821.12	SLC39A8	2071.47	0.741126	0.17451	4.2469	2.16746e-05	0.000284836
ENSG00000072071.16	ADGRL1	159.794	-1.72252	0.40558	-4.24706	2.16594e-05	0.000284836
ENSG00000112299.7	VNN1	20.8642	4.32319	1.01802	4.24664	2.16996e-05	0.000284951
ENSG00000107566.13	ERLIN1	3085.63	-0.725228	0.170792	-4.24626	2.17371e-05	0.000285231
ENSG00000105983.20	LMBR1	6051.71	0.794392	0.187094	4.24595	2.17672e-05	0.000285412
ENSG00000139200.13	PIANP	9.76136	-6.63642	1.56383	-4.24369	2.19878e-05	0.000288089
ENSG00000065989.15	PDE4A	38.2541	-4.06199	0.957546	-4.24208	2.21453e-05	0.000289937
ENSG00000145569.5	OTULINL	414.116	-1.56682	0.369503	-4.24033	2.23189e-05	0.000291992
ENSG00000166908.17	PIP4K2C	190.786	-1.20448	0.284103	-4.23957	2.23946e-05	0.000292764
ENSG00000277531.2	PNMA8C	18.5308	-4.85524	1.1455	-4.23854	2.24974e-05	0.000293889
ENSG00000172059.10	KLF11	1104.59	-0.645015	0.152264	-4.23617	2.27363e-05	0.000296788
ENSG00000185652.11	NTF3	10.0077	-6.60426	1.55946	-4.23497	2.28579e-05	0.000298154
ENSG00000274588.1	DGKK	780.316	-3.88877	0.918322	-4.23465	2.28911e-05	0.000298367
ENSG00000089159.16	PXN	8119.05	0.623642	0.147286	4.23421	2.29358e-05	0.000298726
ENSG00000151834.15	GABRA2	25.6544	-4.4083	1.04152	-4.23257	2.31038e-05	0.000300692
ENSG00000115107.19	STEAP3	178.592	-1.492	0.352762	-4.22947	2.34246e-05	0.000304641
ENSG00000170955.9	CAVIN3	6394.97	0.929212	0.21986	4.22638	2.37486e-05	0.000308626
ENSG00000170390.15	DCLK2	590.613	0.969921	0.229621	4.22401	2.39989e-05	0.000311648
ENSG00000087077.13	TRIP6	641.977	-1.06931	0.253185	-4.22344	2.40603e-05	0.000311996
ENSG00000071205.11	ARHGAP10	325.458	-1.11954	0.265078	-4.22343	2.40612e-05	0.000311996
ENSG00000102897.9	LYRM1	628.417	0.725083	0.171721	4.22246	2.41653e-05	0.000313114
ENSG00000108861.8	DUSP3	8076.73	0.824825	0.195401	4.22119	2.43017e-05	0.000314418
ENSG00000152154.10	TMEM178A	136.349	1.62485	0.384923	4.22124	2.42967e-05	0.000314418
ENSG00000175274.18	TP53I11	12502.2	1.23044	0.29164	4.21905	2.45337e-05	0.000317186
ENSG00000104722.13	NEFM	19.6372	-6.32159	1.49896	-4.21731	2.4723e-05	0.000319398
ENSG00000083720.12	OXCT1	398.887	-0.983821	0.233313	-4.21674	2.47864e-05	0.000319981
ENSG00000102572.14	STK24	2535.14	-0.609279	0.144597	-4.21364	2.5129e-05	0.000324165
ENSG00000131435.12	PDLIM4	412.948	-1.25769	0.298562	-4.21251	2.52549e-05	0.000325551
ENSG00000157045.8	NTAN1	2734.3	0.667928	0.158565	4.21232	2.52766e-05	0.000325591
ENSG00000075340.22	ADD2	67.9472	-2.06639	0.490605	-4.21192	2.53213e-05	0.000325928
ENSG00000106560.10	GIMAP2	126.949	1.17813	0.279835	4.21008	2.55277e-05	0.000328344
ENSG00000256671.6	LIMS4	229.92	0.939503	0.223175	4.20972	2.55692e-05	0.000328638
ENSG00000123416.15	TUBA1B	79154.5	0.603384	0.143525	4.20405	2.62185e-05	0.000336736
ENSG00000131370.15	SH3BP5	3903.33	1.26776	0.30159	4.2036	2.62708e-05	0.000337162
ENSG00000256043.2	CTSO	863.367	-0.715722	0.170422	-4.19971	2.67258e-05	0.00034275
ENSG00000140044.12	JDP2	50.003	-2.00443	0.477375	-4.19886	2.68266e-05	0.000343791
ENSG00000109919.9	MTCH2	5198.64	0.512203	0.122026	4.19751	2.6987e-05	0.000345596
ENSG00000102317.17	RBM3	3987.25	0.550602	0.131208	4.19641	2.71185e-05	0.000347026
ENSG00000275450.1	AL845472.1	248.112	0.996143	0.237484	4.19457	2.73392e-05	0.000349595
ENSG00000120820.12	GLT8D2	66.0502	-2.01385	0.480541	-4.19081	2.77965e-05	0.000355185
ENSG00000176485.11	PLA2G16	243.772	-1.27481	0.30461	-4.18505	2.85101e-05	0.000364037
ENSG00000157954.14	WIPI2	4368.05	-0.523241	0.125077	-4.18336	2.87229e-05	0.000366404
ENSG00000153707.16	PTPRD	629.291	-0.830859	0.198616	-4.18325	2.87372e-05	0.000366404
ENSG00000012232.8	EXTL3	9068.21	-0.540704	0.12934	-4.18049	2.90888e-05	0.000370618
ENSG00000133800.8	LYVE1	3316.22	0.909155	0.217531	4.17942	2.92254e-05	0.000372089
ENSG00000186340.15	THBS2	62.8085	-3.3666	0.805882	-4.17753	2.94689e-05	0.000374917
ENSG00000119718.10	EIF2B2	2747.08	0.785361	0.188009	4.17726	2.95046e-05	0.000375099
ENSG00000120949.14	TNFRSF8	67.6321	-2.72716	0.652983	-4.17646	2.96075e-05	0.000376136
ENSG00000131378.13	RFTN1	1907.49	-0.766237	0.183494	-4.17582	2.96913e-05	0.000376927
ENSG00000010219.13	DYRK4	1213.17	0.647783	0.155135	4.1756	2.97196e-05	0.000377014
ENSG00000146376.10	ARHGAP18	1095.82	1.16925	0.280122	4.17409	2.99178e-05	0.000379254
ENSG00000166886.12	NAB2	146.732	-1.26161	0.302289	-4.17352	2.99929e-05	0.000379932
ENSG00000172399.5	MYOZ2	86.275	-2.12509	0.509209	-4.17332	3.0019e-05	0.000379988
ENSG00000184574.9	LPAR5	21.9462	-4.09833	0.982144	-4.17284	3.00829e-05	0.000380523
ENSG00000154930.14	ACSS1	207.583	1.40373	0.336475	4.17187	3.02113e-05	0.000381872
ENSG00000198732.10	SMOC1	16.1053	6.05748	1.45221	4.17122	3.02967e-05	0.000382675
ENSG00000172179.11	PRL	18.7167	4.12127	0.988449	4.16943	3.05358e-05	0.000385142
ENSG00000111961.17	SASH1	8212.17	-0.6101	0.146326	-4.16945	3.05338e-05	0.000385142
ENSG00000178718.6	RPP25	1899.35	1.17409	0.281751	4.16711	3.08486e-05	0.000388529
ENSG00000148204.11	CRB2	47.6364	-7.69562	1.84674	-4.16714	3.08448e-05	0.000388529
ENSG00000136274.8	NACAD	88.368	-1.61105	0.38683	-4.16477	3.11673e-05	0.000392261
ENSG00000023909.9	GCLM	819.578	0.681221	0.16359	4.16419	3.12463e-05	0.000392973
ENSG00000103310.10	ZP2	25.679	4.89456	1.17652	4.16019	3.17981e-05	0.000399628
ENSG00000197043.13	ANXA6	5539.88	0.626014	0.150526	4.15886	3.19841e-05	0.000401677
ENSG00000085552.16	IGSF9	144.266	-1.45112	0.349057	-4.15726	3.22084e-05	0.000404205
ENSG00000173210.19	ABLIM3	1245.48	1.02006	0.245466	4.15562	3.24409e-05	0.000406832
ENSG00000197798.8	FAM118B	2413.88	0.517471	0.124617	4.1525	3.28857e-05	0.000412116
ENSG00000137747.15	TMPRSS13	24.9219	2.69675	0.649588	4.15148	3.30334e-05	0.000413671
ENSG00000158186.12	MRAS	262.335	-0.979589	0.235993	-4.15092	3.31148e-05	0.000414395
ENSG00000181274.6	FRAT2	964.501	-0.772921	0.186228	-4.15041	3.31885e-05	0.000415021
ENSG00000166275.15	BORCS7	1479.89	0.64025	0.154286	4.14977	3.32807e-05	0.000415878
ENSG00000152932.7	RAB3C	47.5083	1.80704	0.435509	4.14925	3.33562e-05	0.000416525
ENSG00000135047.14	CTSL	5337.48	0.581102	0.140057	4.14904	3.3387e-05	0.000416614
ENSG00000116711.9	PLA2G4A	1113.32	-1.45308	0.350273	-4.14843	3.34767e-05	0.000417436
ENSG00000163017.13	ACTG2	122.835	-7.66081	1.84699	-4.14771	3.35811e-05	0.000418145
ENSG00000237742.6	AL365259.1	28.6579	-3.14394	0.757967	-4.14787	3.35589e-05	0.000418145
ENSG00000227811.2	INKA2-AS1	16.907	4.17959	1.0078	4.14724	3.36512e-05	0.000418721
ENSG00000163728.10	TTC14	445.389	0.748541	0.18055	4.1459	3.38475e-05	0.000420864
ENSG00000114923.16	SLC4A3	10.1805	-6.44059	1.55394	-4.14468	3.40283e-05	0.000422813
ENSG00000130193.7	THEM6	4612.94	-0.755476	0.182322	-4.14363	3.41848e-05	0.000424457
ENSG00000141542.10	RAB40B	313.101	-1.04154	0.251664	-4.1386	3.49431e-05	0.000433566
ENSG00000161649.12	CD300LG	76.9132	-2.22189	0.537031	-4.13736	3.51328e-05	0.000435612
ENSG00000158683.8	PKD1L1	290.661	3.87348	0.936359	4.13675	3.52254e-05	0.000436452
ENSG00000072682.18	P4HA2	1709.34	-0.651844	0.157591	-4.1363	3.52945e-05	0.000437
ENSG00000258819.1	LINC02289	43.1696	-2.26898	0.548594	-4.13599	3.53427e-05	0.000437288
ENSG00000178773.14	CPNE7	9.99084	-6.45301	1.56037	-4.13557	3.5408e-05	0.000437788
ENSG00000120162.9	MOB3B	133.175	1.39897	0.33838	4.13431	3.56015e-05	0.00043987
ENSG00000102452.16	NALCN	10.6028	-6.39461	1.54693	-4.13374	3.56906e-05	0.00044066
ENSG00000162542.13	TMCO4	99.3106	-1.9061	0.461235	-4.1326	3.5869e-05	0.000442553
ENSG00000178537.9	SLC25A20	655.522	-0.7043	0.170442	-4.1322	3.5931e-05	0.000443007
ENSG00000110880.10	CORO1C	20557.6	0.808338	0.195658	4.13139	3.60576e-05	0.000444255
ENSG00000182667.14	NTM	64.5093	-2.54976	0.617259	-4.13078	3.61528e-05	0.000445116
ENSG00000147041.11	SYTL5	96.6933	-8.12079	1.96659	-4.12938	3.63737e-05	0.000447522
ENSG00000148541.12	FAM13C	1052.74	-0.900985	0.218218	-4.12882	3.64628e-05	0.000448304
ENSG00000146950.12	SHROOM2	2508.62	-0.580969	0.140748	-4.12773	3.66355e-05	0.000450112
ENSG00000124357.12	NAGK	3116.4	0.687529	0.166573	4.1275	3.66722e-05	0.000450247
ENSG00000144381.16	HSPD1	16579.5	0.484318	0.117352	4.12706	3.67436e-05	0.000450809
ENSG00000197045.12	GMFB	5556.76	0.672701	0.163059	4.1255	3.69934e-05	0.000453556
ENSG00000066027.11	PPP2R5A	710.669	0.740738	0.179749	4.12096	3.77299e-05	0.000462263
ENSG00000163378.13	EOGT	7230.13	0.746109	0.181135	4.11908	3.80387e-05	0.000465397
ENSG00000197111.15	PCBP2	2571.47	0.515943	0.125254	4.11916	3.8026e-05	0.000465397
ENSG00000008405.11	CRY1	2179.83	0.695567	0.168933	4.11741	3.83151e-05	0.000468453
ENSG00000277260.1	FAM74A7	8.76981	6.63998	1.61279	4.11709	3.83693e-05	0.000468789
ENSG00000230438.6	SERPINB9P1	88.3883	1.68335	0.409208	4.11369	3.89391e-05	0.00047542
ENSG00000139180.10	NDUFA9	3509.76	0.509464	0.123868	4.11296	3.90618e-05	0.000476587
ENSG00000198246.8	SLC29A3	443.836	-1.08743	0.264502	-4.11124	3.93535e-05	0.000479812
ENSG00000169955.7	ZNF747	370.865	-0.881547	0.214582	-4.10821	3.9873e-05	0.000485809
ENSG00000128394.16	APOBEC3F	80.796	-1.5677	0.381842	-4.10563	4.03217e-05	0.000490935
ENSG00000135828.11	RNASEL	300.886	-1.09881	0.26773	-4.10419	4.05737e-05	0.00049366
ENSG00000196693.14	ZNF33B	667.334	0.825957	0.201275	4.10363	4.06719e-05	0.000494513
ENSG00000006453.13	BAIAP2L1	60.1561	-3.30421	0.805295	-4.10311	4.07636e-05	0.000495285
ENSG00000175164.14	ABO	9.71267	-6.4501	1.5726	-4.10156	4.10378e-05	0.000498271
ENSG00000161921.14	CXCL16	37.5688	-2.63523	0.642838	-4.09937	4.14277e-05	0.000502658
ENSG00000123094.15	RASSF8	2282.83	-0.955143	0.233086	-4.09781	4.17073e-05	0.000505702
ENSG00000204580.13	DDR1	118.463	-6.61725	1.61548	-4.09614	4.20091e-05	0.000509008
ENSG00000270629.5	NBPF14	371.624	-1.58276	0.386672	-4.09328	4.25319e-05	0.000514988
ENSG00000182272.11	B4GALNT4	27.9676	-2.72507	0.665843	-4.09266	4.26447e-05	0.000515998
ENSG00000272449.2	AL139246.5	66.6858	-1.87312	0.457764	-4.09188	4.27881e-05	0.000517377
ENSG00000140263.13	SORD	2560.71	-0.792269	0.193685	-4.0905	4.30453e-05	0.000520129
ENSG00000120727.12	PAIP2	3977.88	-0.545365	0.133389	-4.08852	4.34132e-05	0.000524213
ENSG00000153443.12	UBALD1	139.293	-1.59089	0.38932	-4.08633	4.38254e-05	0.000528826
ENSG00000148841.16	ITPRIP	2638.19	-0.553927	0.13558	-4.0856	4.39624e-05	0.000530116
ENSG00000120149.8	MSX2	73.7612	-1.79243	0.43913	-4.08179	4.46904e-05	0.000538524
ENSG00000090971.4	NAT14	594.304	-0.850225	0.208401	-4.07976	4.50831e-05	0.000542883
ENSG00000163377.15	FAM19A4	43.0868	2.49502	0.61196	4.07711	4.55998e-05	0.000548729
ENSG00000124299.13	PEPD	5901.89	0.620532	0.152264	4.07538	4.594e-05	0.000552444
ENSG00000183337.16	BCOR	1483.45	0.843691	0.207061	4.07459	4.60949e-05	0.000553549
ENSG00000175505.10	CLCF1	34.2279	-2.7031	0.663377	-4.07475	4.60641e-05	0.000553549
ENSG00000164236.11	ANKRD33B	229.674	-1.21889	0.299178	-4.07414	4.6184e-05	0.00055424
ENSG00000132274.15	TRIM22	2125.94	-0.787516	0.193389	-4.07218	4.65755e-05	0.000558556
ENSG00000141424.12	SLC39A6	1508	-0.779488	0.191516	-4.07009	4.69945e-05	0.000563196
ENSG00000114353.16	GNAI2	38636.1	0.675232	0.165909	4.06989	4.70355e-05	0.000563282
ENSG00000116954.7	RRAGC	583.408	1.00402	0.246705	4.06974	4.70658e-05	0.000563282
ENSG00000178149.16	DALRD3	483.781	-0.80488	0.197849	-4.06816	4.73856e-05	0.000566723
ENSG00000100385.13	IL2RB	16.4129	-5.6518	1.38943	-4.06772	4.74749e-05	0.000567404
ENSG00000249751.3	ECSCR	8066.25	0.541675	0.133182	4.06719	4.75842e-05	0.000567766
ENSG00000018408.14	WWTR1	30401.6	-0.777492	0.191158	-4.06727	4.75671e-05	0.000567766
ENSG00000111670.15	GNPTAB	4581.68	-0.861702	0.211871	-4.0671	4.76022e-05	0.000567766
ENSG00000152767.16	FARP1	5572.93	0.520873	0.128078	4.06685	4.76519e-05	0.000567973
ENSG00000203880.11	PCMTD2	1680.58	-0.736715	0.181201	-4.06573	4.78827e-05	0.000570337
ENSG00000064601.18	CTSA	8305.23	0.498434	0.122602	4.06547	4.79351e-05	0.000570574
ENSG00000037280.15	FLT4	25629.8	0.723684	0.178114	4.06304	4.84369e-05	0.000576156
ENSG00000082781.11	ITGB5	3884.74	-0.97754	0.240661	-4.0619	4.86744e-05	0.000578589
ENSG00000165821.11	SALL2	410.732	-1.09876	0.270523	-4.06164	4.87302e-05	0.00057886
ENSG00000118137.9	APOA1	15.0387	-4.17503	1.02828	-4.0602	4.90307e-05	0.000582037
ENSG00000151835.15	SACS	1512.11	0.595492	0.146738	4.05819	4.94539e-05	0.000586664
ENSG00000005059.15	MCUB	1959	0.727075	0.179194	4.05746	4.9609e-05	0.000587709
ENSG00000173917.10	HOXB2	543.381	0.884784	0.218056	4.0576	4.95794e-05	0.000587709
ENSG00000179958.8	DCTPP1	3559.46	0.683704	0.168514	4.05725	4.96535e-05	0.00058784
ENSG00000158813.17	EDA	329.109	-1.44313	0.35573	-4.05682	4.97459e-05	0.000588537
ENSG00000120337.8	TNFSF18	44.381	2.20583	0.543762	4.05662	4.97883e-05	0.000588641
ENSG00000171735.18	CAMTA1	1547.94	-0.562494	0.138705	-4.05532	5.00655e-05	0.00059152
ENSG00000170445.13	HARS	5057.64	0.50438	0.124407	4.05427	5.02913e-05	0.000593789
ENSG00000122705.16	CLTA	9284.95	0.473606	0.116847	4.05322	5.05185e-05	0.00059607
ENSG00000102471.14	NDFIP2	2008.52	0.691927	0.170812	4.05081	5.10414e-05	0.000601836
ENSG00000101282.8	RSPO4	15.0958	-3.5934	0.88729	-4.04986	5.12473e-05	0.000603858
ENSG00000144229.11	THSD7B	41.1445	-3.63798	0.898881	-4.04722	5.18284e-05	0.000610296
ENSG00000186111.9	PIP5K1C	3790.02	-0.612984	0.151567	-4.04432	5.24752e-05	0.000617498
ENSG00000164692.17	COL1A2	6669.96	-3.23399	0.799719	-4.0439	5.25685e-05	0.000618182
ENSG00000105401.8	CDC37	6569.66	0.56361	0.139423	4.04243	5.2899e-05	0.000621652
ENSG00000110042.7	DTX4	1326.67	0.872532	0.215874	4.04185	5.30312e-05	0.000622416
ENSG00000276409.4	CCL14	65.2973	3.83081	0.947791	4.04183	5.30349e-05	0.000622416
ENSG00000087237.11	CETP	84.9409	2.20588	0.546118	4.0392	5.3634e-05	0.000629026
ENSG00000064763.10	FAR2	6906.61	-0.730732	0.181038	-4.03634	5.42916e-05	0.000636313
ENSG00000139182.14	CLSTN3	10656.2	-1.09243	0.270664	-4.03611	5.4345e-05	0.000636515
ENSG00000173890.16	GPR160	237.504	-1.16439	0.288572	-4.035	5.46016e-05	0.000639094
ENSG00000170989.9	S1PR1	12292.3	0.94196	0.233492	4.03422	5.47835e-05	0.000640795
ENSG00000083857.13	FAT1	1255.13	-0.983458	0.243847	-4.0331	5.50463e-05	0.000643441
ENSG00000155893.12	PXYLP1	78.4424	-1.75147	0.434351	-4.03237	5.52162e-05	0.000644997
ENSG00000174233.11	ADCY6	676.226	-0.674999	0.167407	-4.03208	5.52864e-05	0.000645388
ENSG00000087253.12	LPCAT2	3352.85	1.01905	0.252878	4.02982	5.58186e-05	0.000651168
ENSG00000141404.15	GNAL	100.239	-1.57699	0.391541	-4.02766	5.63354e-05	0.00065676
ENSG00000078053.16	AMPH	399.049	-3.32343	0.8252	-4.02743	5.63903e-05	0.000656964
ENSG00000197646.7	PDCD1LG2	45.4556	-3.04067	0.755123	-4.02672	5.656e-05	0.000658504
ENSG00000114739.13	ACVR2B	848.78	-0.701302	0.174288	-4.0238	5.72657e-05	0.000666278
ENSG00000136425.13	CIB2	131.076	-1.20896	0.300474	-4.02351	5.73372e-05	0.000666668
ENSG00000146232.16	NFKBIE	1581.05	0.583095	0.144941	4.02298	5.7467e-05	0.000667294
ENSG00000153246.12	PLA2R1	18.3214	-3.4802	0.865066	-4.02304	5.74519e-05	0.000667294
ENSG00000169891.17	REPS2	157.157	1.07456	0.267168	4.02204	5.76959e-05	0.000668625
ENSG00000003989.17	SLC7A2	280.286	-1.09278	0.271693	-4.02212	5.76777e-05	0.000668625
ENSG00000172548.14	NIPAL4	11.8197	-5.32653	1.32427	-4.02223	5.76493e-05	0.000668625
ENSG00000124006.14	OBSL1	633.162	-1.08113	0.268826	-4.02168	5.77845e-05	0.00066921
ENSG00000159720.11	ATP6V0D1	9080	0.478257	0.118945	4.02082	5.7995e-05	0.000671205
ENSG00000170775.2	GPR37	1198.6	-0.870594	0.216563	-4.02004	5.81879e-05	0.000672109
ENSG00000120885.21	CLU	553.964	-1.225	0.304717	-4.02013	5.81672e-05	0.000672109
ENSG00000138101.18	DTNB	185.007	-0.946783	0.235514	-4.02007	5.81802e-05	0.000672109
ENSG00000101871.14	MID1	3175.65	0.588032	0.146337	4.01835	5.86079e-05	0.000676514
ENSG00000100242.15	SUN2	2966.35	-0.849456	0.211476	-4.0168	5.89949e-05	0.000680535
ENSG00000141198.15	TOM1L1	82.7247	-1.92037	0.478213	-4.01571	5.92664e-05	0.000683218
ENSG00000170425.3	ADORA2B	2036.19	-0.98326	0.24488	-4.01527	5.93776e-05	0.00068405
ENSG00000003249.13	DBNDD1	409.553	1.5032	0.374744	4.01129	6.03889e-05	0.000695244
ENSG00000140848.16	CPNE2	5649.65	0.638321	0.159197	4.00962	6.08175e-05	0.00069972
ENSG00000111845.4	PAK1IP1	1014.34	0.590059	0.147185	4.00896	6.09864e-05	0.000700745
ENSG00000100351.16	GRAP2	18.2356	5.9456	1.48303	4.00909	6.09542e-05	0.000700745
ENSG00000136160.15	EDNRB	378.78	1.57973	0.394066	4.0088	6.10281e-05	0.000700766
ENSG00000135049.15	AGTPBP1	1408.08	0.622214	0.155324	4.00592	6.17777e-05	0.000708909
ENSG00000155876.5	RRAGA	7339.6	0.455023	0.113731	4.00087	6.31113e-05	0.00072374
ENSG00000129518.8	EAPP	909.921	-0.622189	0.155546	-4.00003	6.33339e-05	0.000725818
ENSG00000115306.15	SPTBN1	29559.2	-0.542085	0.135547	-3.99923	6.35485e-05	0.000727803
ENSG00000172164.14	SNTB1	358.563	3.15639	0.789297	3.999	6.36118e-05	0.000727871
ENSG00000128917.7	DLL4	36861.6	-0.587144	0.146826	-3.9989	6.36374e-05	0.000727871
ENSG00000134108.12	ARL8B	3948.82	0.599339	0.14989	3.99852	6.37388e-05	0.000728557
ENSG00000188452.13	CERKL	111.314	-1.93162	0.483325	-3.99652	6.42801e-05	0.000734266
ENSG00000131653.12	TRAF7	2834.09	0.672656	0.168317	3.99636	6.43244e-05	0.000734294
ENSG00000170385.9	SLC30A1	2261.85	0.710653	0.17788	3.99512	6.46609e-05	0.000737656
ENSG00000237523.1	LINC00857	9.91657	-6.34215	1.58763	-3.99472	6.477e-05	0.00073842
ENSG00000225921.6	NOL7	2806.08	0.500078	0.125206	3.99404	6.49581e-05	0.000740084
ENSG00000170017.12	ALCAM	777.119	-2.39878	0.600659	-3.99358	6.50823e-05	0.000741018
ENSG00000144583.4	MARCH4	61.7997	-2.26366	0.56704	-3.99207	6.54983e-05	0.000745271
ENSG00000182175.14	RGMA	137.893	-1.75785	0.440765	-3.98817	6.65851e-05	0.000757146
ENSG00000083444.16	PLOD1	19579.2	-0.578068	0.145007	-3.98649	6.7058e-05	0.000762031
ENSG00000187243.16	MAGED4B	4360.46	0.729906	0.183168	3.98489	6.75108e-05	0.00076668
ENSG00000129128.12	SPCS3	6784.4	-0.664644	0.166819	-3.98422	6.77027e-05	0.000768362
ENSG00000172661.18	WASHC2C	4035.33	0.537737	0.134998	3.98329	6.79684e-05	0.00077088
ENSG00000105419.17	MEIS3	117.4	-1.60541	0.403137	-3.98229	6.82534e-05	0.000773612
ENSG00000181830.8	SLC35C1	1924.87	0.750352	0.188487	3.98093	6.86451e-05	0.000777549
ENSG00000141696.12	P3H4	3614.53	-0.747674	0.187832	-3.98055	6.87558e-05	0.000778301
ENSG00000157502.13	MUM1L1	134.927	1.30592	0.328108	3.98015	6.88728e-05	0.000779123
ENSG00000105483.17	CARD8	2539.36	0.489699	0.123057	3.97946	6.90705e-05	0.000780857
ENSG00000113328.18	CCNG1	8981.87	0.690396	0.173603	3.97688	6.98264e-05	0.000788895
ENSG00000006128.11	TAC1	32.3124	2.39004	0.601159	3.97573	7.01643e-05	0.000792203
ENSG00000102755.11	FLT1	59947.6	-0.723453	0.181997	-3.97509	7.03526e-05	0.000793818
ENSG00000154162.14	CDH12	18.1631	4.92705	1.2411	3.96989	7.1906e-05	0.000810304
ENSG00000158457.5	TSPAN33	10.8136	-5.88375	1.48207	-3.96996	7.1886e-05	0.000810304
ENSG00000181031.15	RPH3AL	147.595	-1.15825	0.292229	-3.96349	7.38607e-05	0.000831798
ENSG00000118526.6	TCF21	29.9452	-3.99716	1.00891	-3.96187	7.43654e-05	0.000836945
ENSG00000135473.14	PAN2	475.232	-0.992898	0.250781	-3.95922	7.51962e-05	0.000845752
ENSG00000184254.16	ALDH1A3	10.4415	-5.53658	1.39912	-3.95719	7.58362e-05	0.000852405
ENSG00000153558.15	FBXL2	1265.65	0.821436	0.207615	3.95654	7.60423e-05	0.00085369
ENSG00000125148.6	MT2A	422.084	-1.34774	0.340638	-3.95653	7.60478e-05	0.00085369
ENSG00000005243.9	COPZ2	64.1689	-2.52834	0.639079	-3.95623	7.6142e-05	0.000854201
ENSG00000164604.12	GPR85	254.282	-1.06354	0.268914	-3.95494	7.65536e-05	0.00085827
ENSG00000256340.8	ABCC6P1	11.1302	-5.39342	1.36386	-3.95452	7.66873e-05	0.000859221
ENSG00000185813.10	PCYT2	1227.62	0.665601	0.168369	3.95322	7.71068e-05	0.00086337
ENSG00000203722.7	RAET1G	12.15	-4.8268	1.22107	-3.95293	7.72016e-05	0.000863881
ENSG00000136011.14	STAB2	262.854	5.88872	1.49061	3.95055	7.79728e-05	0.000871954
ENSG00000123360.11	PDE1B	13.159	-5.11178	1.29471	-3.94821	7.87364e-05	0.000879934
ENSG00000148344.10	PTGES	13.0981	-4.90611	1.24271	-3.9479	7.88392e-05	0.000880521
ENSG00000157514.16	TSC22D3	5394.39	-0.964949	0.244458	-3.9473	7.9036e-05	0.000882158
ENSG00000146006.7	LRRTM2	50.3768	2.5503	0.646211	3.94654	7.92897e-05	0.000883867
ENSG00000175287.18	PHYHD1	43.6031	-2.13676	0.541419	-3.94659	7.9271e-05	0.000883867
ENSG00000081320.10	STK17B	680.728	-0.987177	0.250256	-3.94467	7.99093e-05	0.000890208
ENSG00000173262.11	SLC2A14	137.136	-1.31437	0.333313	-3.94335	8.03514e-05	0.000894565
ENSG00000184113.9	CLDN5	39870.9	2.01836	0.511965	3.94237	8.06806e-05	0.000897662
ENSG00000182534.13	MXRA7	2285.45	-0.746505	0.189373	-3.94199	8.08094e-05	0.000898525
ENSG00000130021.13	PUDP	3056.41	0.626464	0.158952	3.94123	8.10656e-05	0.000900543
ENSG00000152939.15	MARVELD2	134.444	-1.32215	0.335473	-3.94115	8.10935e-05	0.000900543
ENSG00000079277.20	MKNK1	1105.59	0.708317	0.179799	3.93948	8.16573e-05	0.00090623
ENSG00000110786.17	PTPN5	18.473	-3.1262	0.793975	-3.9374	8.23698e-05	0.000913561
ENSG00000104626.14	ERI1	642.275	-0.751297	0.190921	-3.93513	8.31526e-05	0.000921608
ENSG00000108018.15	SORCS1	81.7043	-2.59875	0.66042	-3.93499	8.32003e-05	0.000921608
ENSG00000106799.12	TGFBR1	3547.27	-0.826919	0.210159	-3.93473	8.3291e-05	0.000922031
ENSG00000117691.9	NENF	1332.55	1.15404	0.293338	3.93415	8.34904e-05	0.000923656
ENSG00000224189.7	HAGLR	823.062	1.33354	0.339036	3.93333	8.37762e-05	0.000925837
ENSG00000104313.18	EYA1	20.9278	4.05574	1.03117	3.93313	8.38458e-05	0.000925837
ENSG00000161905.12	ALOX15	10.6107	-6.15083	1.56383	-3.93319	8.38261e-05	0.000925837
ENSG00000278709.1	NKILA	134.544	-1.33152	0.338832	-3.92975	8.50351e-05	0.000938379
ENSG00000089876.11	DHX32	3377.91	0.651491	0.165815	3.92903	8.52876e-05	0.000940574
ENSG00000084674.14	APOB	71.9472	1.96095	0.49937	3.92686	8.6063e-05	0.00094853
ENSG00000158710.14	TAGLN2	13384.1	-0.682224	0.173782	-3.92574	8.64638e-05	0.00095235
ENSG00000109667.11	SLC2A9	56.9104	-1.69061	0.430751	-3.92481	8.67992e-05	0.000955444
ENSG00000015133.18	CCDC88C	872.367	1.13315	0.289068	3.92001	8.85456e-05	0.000974057
ENSG00000127527.13	EPS15L1	817.809	0.648852	0.165541	3.91957	8.87053e-05	0.000975203
ENSG00000111678.10	C12orf57	1715.33	-0.911891	0.232703	-3.91869	8.90329e-05	0.000978192
ENSG00000175538.10	KCNE3	413.577	1.44981	0.370225	3.91604	9.00167e-05	0.000988383
ENSG00000008118.9	CAMK1G	57.3205	-3.41989	0.873462	-3.91533	9.02813e-05	0.000990668
ENSG00000113494.16	PRLR	12.9788	-5.19778	1.32796	-3.9141	9.07431e-05	0.000995113
ENSG00000137878.17	GCOM1	1051.07	0.637851	0.163007	3.91304	9.11421e-05	0.000998865
ENSG00000180592.16	SKIDA1	127.351	-1.15986	0.296425	-3.91282	9.12241e-05	0.00099914
ENSG00000270571.2	AC007681.1	229.1	1.55171	0.396622	3.91232	9.14131e-05	0.00100059
ENSG00000074410.13	CA12	14.402	-5.23563	1.33849	-3.91158	9.16928e-05	0.00100302
ENSG00000134250.19	NOTCH2	1976.4	-2.11514	0.540919	-3.91027	9.21939e-05	0.00100788
ENSG00000116161.17	CACYBP	4808.38	0.499162	0.127695	3.90901	9.26751e-05	0.00101188
ENSG00000171206.14	TRIM8	7291.7	-0.633555	0.162074	-3.90905	9.26617e-05	0.00101188
ENSG00000137449.15	CPEB2	744.892	0.741435	0.189855	3.90527	9.41185e-05	0.001027
ENSG00000075711.20	DLG1	2412.02	0.567491	0.14544	3.90188	9.54492e-05	0.00104087
ENSG00000198513.11	ATL1	457.928	0.97834	0.250766	3.90141	9.56332e-05	0.00104223
ENSG00000113578.17	FGF1	11.5504	-5.42032	1.38966	-3.90047	9.60056e-05	0.00104564
ENSG00000111412.5	C12orf49	2930.96	0.501237	0.128594	3.89782	9.70607e-05	0.00105637
ENSG00000136811.16	ODF2	2875.6	0.522096	0.133953	3.89761	9.71458e-05	0.00105637
ENSG00000121797.9	CCRL2	498.301	0.74268	0.19055	3.89755	9.71715e-05	0.00105637
ENSG00000171495.16	MROH2B	12.9956	5.50263	1.41355	3.89278	9.91021e-05	0.00107603
ENSG00000133943.20	DGLUCY	2180.34	-0.532309	0.136742	-3.8928	9.90946e-05	0.00107603
ENSG00000059378.12	PARP12	335.292	-0.923147	0.237221	-3.89151	9.96207e-05	0.00108099
ENSG00000124588.19	NQO2	716.333	-0.642644	0.165193	-3.89027	0.000100134	0.00108589
ENSG00000198932.12	GPRASP1	58.0411	-2.60743	0.670413	-3.88928	0.00010054	0.00108962
ENSG00000122591.11	FAM126A	2983.74	0.571108	0.146875	3.88839	0.000100913	0.00109298
ENSG00000104331.8	IMPAD1	8348.76	-0.601765	0.155021	-3.88184	0.000103671	0.00112216
ENSG00000128591.15	FLNC	1408.06	-2.9548	0.761702	-3.87921	0.000104795	0.00113364
ENSG00000008517.16	IL32	5995.82	2.79941	0.721862	3.87803	0.000105305	0.00113845
ENSG00000134352.19	IL6ST	17660.8	-0.962555	0.248243	-3.87747	0.000105547	0.00114037
ENSG00000228451.4	SDAD1P1	54.055	-1.7166	0.442777	-3.8769	0.000105796	0.00114235
ENSG00000175182.14	FAM131A	115.661	-1.23689	0.319328	-3.8734	0.000107328	0.00115818
ENSG00000183160.8	TMEM119	65.7547	-6.66957	1.72274	-3.87149	0.000108173	0.00116651
ENSG00000164509.13	IL31RA	16.0524	-5.36383	1.38552	-3.87135	0.000108233	0.00116651
ENSG00000109062.11	SLC9A3R1	1665.86	-0.845651	0.21845	-3.87114	0.000108327	0.00116681
ENSG00000127824.13	TUBA4A	275.676	1.99535	0.515515	3.87059	0.000108572	0.00116873
ENSG00000165511.6	C10orf25	132.68	-1.07036	0.276687	-3.86847	0.000109519	0.0011782
ENSG00000260912.1	AL158206.1	2152.56	-1.07043	0.276719	-3.86828	0.000109604	0.00117839
ENSG00000148677.6	ANKRD1	700.333	-3.84753	0.994966	-3.867	0.000110182	0.00118388
ENSG00000124216.3	SNAI1	166.02	1.09636	0.283579	3.86615	0.000110569	0.00118732
ENSG00000082556.10	OPRK1	14.6966	4.88243	1.26313	3.86535	0.000110931	0.00119048
ENSG00000091972.18	CD200	2699.18	0.650851	0.168438	3.86405	0.000111523	0.00119609
ENSG00000109184.14	DCUN1D4	2775.5	0.556736	0.144134	3.86264	0.000112167	0.00120226
ENSG00000173852.14	DPY19L1	1349.69	-0.720445	0.186548	-3.86198	0.000112471	0.00120479
ENSG00000185361.8	TNFAIP8L1	4601.77	0.982334	0.254385	3.8616	0.000112645	0.00120519
ENSG00000114520.10	SNX4	2855.82	0.550258	0.142493	3.86164	0.000112627	0.00120519
ENSG00000091879.13	ANGPT2	4145.83	1.22836	0.318157	3.86087	0.000112984	0.00120807
ENSG00000156931.15	VPS8	3833.7	0.587394	0.152201	3.85934	0.000113695	0.00121493
ENSG00000138675.16	FGF5	16.6377	-4.91831	1.27708	-3.85121	0.000117536	0.00125522
ENSG00000088356.5	PDRG1	1738.38	0.536846	0.139426	3.8504	0.000117927	0.00125786
ENSG00000143457.10	GOLPH3L	1190.03	-0.729757	0.189522	-3.85051	0.00011787	0.00125786
ENSG00000075651.15	PLD1	3254.37	-0.897951	0.233365	-3.84784	0.000119162	0.00127027
ENSG00000197467.14	COL13A1	304.405	1.27004	0.330186	3.84644	0.000119844	0.00127676
ENSG00000127528.5	KLF2	253.568	-3.26374	0.849221	-3.84322	0.000121432	0.0012929
ENSG00000160752.14	FDPS	10645.8	0.499195	0.129935	3.84188	0.000122096	0.00129918
ENSG00000182957.15	SPATA13	577.409	0.700682	0.182455	3.8403	0.000122886	0.00130679
ENSG00000242114.5	MTFP1	851.042	0.693323	0.180669	3.83754	0.000124274	0.00132075
ENSG00000010295.19	IFFO1	795.991	0.615823	0.160497	3.83698	0.000124554	0.00132293
ENSG00000139597.17	N4BP2L1	32.1247	-2.3951	0.624978	-3.83229	0.000126956	0.00134762
ENSG00000164050.12	PLXNB1	702.535	0.734775	0.191859	3.82976	0.00012827	0.00135998
ENSG00000169231.13	THBS3	285.175	-0.776164	0.202667	-3.82975	0.000128275	0.00135998
ENSG00000178878.12	APOLD1	1441.36	1.11302	0.29069	3.8289	0.000128717	0.00136384
ENSG00000198075.9	SULT1C4	1339.63	-0.584489	0.152679	-3.82821	0.000129078	0.00136684
ENSG00000184530.8	C6orf58	148.051	2.19011	0.572457	3.82581	0.000130344	0.00137941
ENSG00000163485.16	ADORA1	53.7566	-2.06494	0.540103	-3.82323	0.000131716	0.0013931
ENSG00000130309.10	COLGALT1	8801.9	0.743713	0.194568	3.82239	0.000132165	0.00139701
ENSG00000165757.8	JCAD	1532.46	0.601402	0.157376	3.82143	0.000132681	0.00140161
ENSG00000162882.14	HAAO	9.97943	-5.25665	1.37571	-3.82105	0.000132885	0.00140292
ENSG00000102967.11	DHODH	348.899	0.791209	0.207096	3.8205	0.00013318	0.0014052
ENSG00000169946.13	ZFPM2	1208.3	-0.625321	0.16369	-3.82015	0.000133369	0.00140634
ENSG00000204231.10	RXRB	458.853	-0.721768	0.189244	-3.81395	0.000136765	0.00144129
ENSG00000170382.11	LRRN2	16.9492	-5.31842	1.39477	-3.81311	0.000137229	0.00144531
ENSG00000166922.8	SCG5	67.1422	-2.32921	0.610927	-3.81258	0.000137522	0.00144753
ENSG00000068079.7	IFI35	112.68	-1.5872	0.416329	-3.81237	0.000137639	0.00144789
ENSG00000254687.1	AC009646.2	9.46204	5.27383	1.38357	3.81176	0.000137983	0.00145064
ENSG00000007237.18	GAS7	108.48	-1.83846	0.482344	-3.8115	0.000138126	0.00145127
ENSG00000160050.14	CCDC28B	482.374	-0.812025	0.213208	-3.8086	0.000139753	0.00146749
ENSG00000196586.13	MYO6	9723.35	-0.654783	0.171971	-3.80751	0.000140374	0.00147313
ENSG00000125746.16	EML2	135.135	-1.57161	0.412839	-3.80683	0.000140758	0.00147628
ENSG00000138642.14	HERC6	275.313	-1.05909	0.278268	-3.806	0.00014123	0.00148034
ENSG00000189058.8	APOD	85.4186	2.25535	0.592649	3.80554	0.000141493	0.00148222
ENSG00000129474.15	AJUBA	588.247	-0.809936	0.212937	-3.80363	0.000142589	0.0014928
ENSG00000112033.13	PPARD	1246.39	0.692366	0.182096	3.8022	0.000143417	0.00150058
ENSG00000213928.8	IRF9	441.12	-0.973234	0.256027	-3.80129	0.000143943	0.00150518
ENSG00000258947.6	TUBB3	2653.08	0.841599	0.221431	3.80073	0.000144271	0.00150772
ENSG00000165152.8	TMEM246	1395.13	0.832752	0.219126	3.80033	0.000144504	0.00150926
ENSG00000265190.6	ANXA8	8.54403	-6.21147	1.63476	-3.79961	0.000144922	0.00151272
ENSG00000004799.7	PDK4	254.568	-1.59982	0.421094	-3.79921	0.000145159	0.0015143
ENSG00000116209.11	TMEM59	9094.21	-0.543632	0.143102	-3.79892	0.000145326	0.00151479
ENSG00000165879.8	FRAT1	300.724	-1.40831	0.370721	-3.79883	0.000145379	0.00151479
ENSG00000155011.8	DKK2	75.5116	2.06721	0.54438	3.79736	0.000146243	0.00152288
ENSG00000164751.14	PEX2	672.937	-0.621415	0.163699	-3.79608	0.000147002	0.00152989
ENSG00000092330.16	TINF2	1432.49	-0.528494	0.139235	-3.7957	0.000147226	0.00153131
ENSG00000162576.16	MXRA8	186.148	-5.01927	1.3227	-3.7947	0.000147819	0.00153657
ENSG00000102924.11	CBLN1	10.5449	5.23213	1.37891	3.79439	0.000148008	0.00153762
ENSG00000143578.15	CREB3L4	140.326	-1.13396	0.298895	-3.79384	0.000148335	0.0015401
ENSG00000100441.9	KHNYN	2709.12	-0.677657	0.178646	-3.7933	0.000148655	0.00154252
ENSG00000131747.14	TOP2A	2493.69	-0.656466	0.173076	-3.79293	0.000148881	0.00154395
ENSG00000136048.13	DRAM1	3395.28	-0.700836	0.184805	-3.7923	0.000149257	0.00154693
ENSG00000181722.16	ZBTB20	175.95	-1.21676	0.320962	-3.79097	0.00015006	0.00155434
ENSG00000101000.5	PROCR	5344.04	-0.626322	0.165236	-3.79047	0.000150362	0.00155655
ENSG00000232759.1	AC002480.1	25.9088	4.64326	1.22622	3.78665	0.000152694	0.00157865
ENSG00000171940.13	ZNF217	732.569	-0.869685	0.229663	-3.78679	0.000152606	0.00157865
ENSG00000166046.10	TCP11L2	47.1221	-1.85394	0.489615	-3.78653	0.000152767	0.00157865
ENSG00000125740.13	FOSB	116.601	-1.7955	0.474803	-3.78157	0.000155845	0.00160951
ENSG00000260027.4	HOXB7	1941.13	0.585086	0.154855	3.77829	0.000157908	0.00162986
ENSG00000189362.11	NEMP2	327.778	-1.0289	0.27237	-3.77757	0.000158365	0.00163308
ENSG00000166482.11	MFAP4	19.328	-4.81416	1.27443	-3.77751	0.000158406	0.00163308
ENSG00000001630.16	CYP51A1	11924.7	0.544692	0.14424	3.77629	0.000159184	0.00163939
ENSG00000095587.8	TLL2	32.1699	3.46221	0.916853	3.77619	0.000159244	0.00163939
ENSG00000114631.10	PODXL2	473.905	-0.743825	0.196982	-3.77611	0.000159299	0.00163939
ENSG00000158270.11	COLEC12	5777.23	0.887977	0.235228	3.77496	0.000160036	0.00164602
ENSG00000118515.11	SGK1	1181.06	-2.4395	0.646348	-3.77428	0.00016047	0.00164952
ENSG00000243244.6	STON1	360.774	-0.97333	0.258153	-3.77037	0.000163008	0.00167462
ENSG00000113312.10	TTC1	2733.38	0.492704	0.130772	3.76766	0.000164786	0.0016919
ENSG00000109083.13	IFT20	928.092	-0.589616	0.156511	-3.76725	0.000165057	0.00169369
ENSG00000100842.12	EFS	31.9227	-3.07708	0.817528	-3.76388	0.000167296	0.00171566
ENSG00000023041.11	ZDHHC6	1635.67	0.579595	0.15402	3.76311	0.000167815	0.00171999
ENSG00000145808.9	ADAMTS19	24.9136	4.83332	1.28478	3.76198	0.000168572	0.00172656
ENSG00000105894.11	PTN	20.0331	-4.81472	1.27988	-3.76186	0.000168653	0.00172656
ENSG00000131724.10	IL13RA1	4765.67	-0.990617	0.263448	-3.7602	0.00016978	0.00173707
ENSG00000204186.8	ZDBF2	683.509	-0.727015	0.193403	-3.75907	0.000170543	0.00174387
ENSG00000080845.17	DLGAP4	3633.86	0.759252	0.202019	3.75833	0.000171053	0.00174806
ENSG00000115935.17	WIPF1	1327.85	0.537	0.14293	3.75707	0.000171913	0.00175583
ENSG00000152818.18	UTRN	5401.75	0.441935	0.117769	3.75257	0.000175032	0.00178665
ENSG00000140497.16	SCAMP2	5313.29	0.633079	0.168732	3.75197	0.000175449	0.00178883
ENSG00000197555.9	SIPA1L1	1484.07	-0.564314	0.150402	-3.75204	0.000175401	0.00178883
ENSG00000135905.19	DOCK10	492.767	0.727673	0.193952	3.75182	0.000175556	0.00178887
ENSG00000166856.2	GPR182	13.3519	5.68991	1.5169	3.75102	0.000176118	0.00179357
ENSG00000169047.5	IRS1	41.1319	-3.32034	0.88539	-3.75014	0.000176736	0.00179881
ENSG00000113119.12	TMCO6	337.174	-0.792372	0.21139	-3.74839	0.000177972	0.00181035
ENSG00000163932.13	PRKCD	142.871	-1.27582	0.340382	-3.74821	0.000178103	0.00181063
ENSG00000109424.3	UCP1	7.9433	6.2641	1.6713	3.74803	0.000178229	0.00181086
ENSG00000256061.7	DNAAF4	128.952	1.20368	0.321237	3.74702	0.00017895	0.00181714
ENSG00000156136.9	DCK	1923.64	0.572953	0.15324	3.73891	0.000184818	0.00187514
ENSG00000170921.15	TANC2	801.459	-0.81588	0.218218	-3.73883	0.000184876	0.00187514
ENSG00000180440.3	SERTM1	23.0551	-4.29135	1.14808	-3.73784	0.000185609	0.00188148
ENSG00000170412.16	GPRC5C	482.589	-1.48415	0.397142	-3.73707	0.000186179	0.00188509
ENSG00000174446.12	SNAPC5	338.381	-0.733131	0.196171	-3.7372	0.000186079	0.00188509
ENSG00000167323.11	STIM1	1588.11	0.516368	0.138186	3.73676	0.000186404	0.00188628
ENSG00000134884.14	ARGLU1	5984.86	-0.727911	0.194818	-3.73636	0.000186702	0.00188821
ENSG00000182022.17	CHST15	7523.64	0.895747	0.239767	3.7359	0.000187042	0.00189055
ENSG00000133121.20	STARD13	1841.18	-0.678567	0.181717	-3.7342	0.000188312	0.0019023
ENSG00000175874.9	CREG2	964.962	1.29271	0.346401	3.73183	0.000190092	0.00191918
ENSG00000239857.6	GET4	3007.93	0.659898	0.176912	3.7301	0.000191405	0.00193133
ENSG00000181004.9	BBS12	483.557	-0.72399	0.194133	-3.72934	0.00019198	0.00193601
ENSG00000164713.9	BRI3	1159.99	0.68637	0.184185	3.72652	0.000194141	0.00195668
ENSG00000188158.15	NHS	387.763	-1.18456	0.317914	-3.72605	0.000194507	0.00195924
ENSG00000228960.6	OR2A9P	309.786	0.834565	0.224008	3.72561	0.000194842	0.00196149
ENSG00000145506.13	NKD2	99.6268	2.27832	0.611622	3.72505	0.00019528	0.00196477
ENSG00000144868.13	TMEM108	204.406	-0.937332	0.251821	-3.72222	0.000197482	0.00198579
ENSG00000100034.13	PPM1F	8258.32	0.655979	0.176255	3.72176	0.000197839	0.00198825
ENSG00000170485.16	NPAS2	880.355	-0.792692	0.213065	-3.72043	0.000198887	0.00199763
ENSG00000141449.14	GREB1L	550.651	0.968645	0.260412	3.71966	0.000199489	0.00200253
ENSG00000038274.16	MAT2B	4149.71	-0.601415	0.161744	-3.71832	0.000200552	0.00201185
ENSG00000112378.11	PERP	3102.73	-0.470463	0.12653	-3.7182	0.000200647	0.00201185
ENSG00000269155.2	AL009178.2	52.7814	2.12761	0.57237	3.7172	0.000201441	0.00201867
ENSG00000105928.14	GSDME	792.36	-0.770311	0.207248	-3.71685	0.000201723	0.00202034
ENSG00000114446.4	IFT57	1954.01	0.486539	0.13095	3.71546	0.000202837	0.00203033
ENSG00000119514.6	GALNT12	11.238	-5.46126	1.47011	-3.71486	0.000203315	0.00203397
ENSG00000244687.11	UBE2V1	8773.17	0.476828	0.128383	3.71411	0.000203918	0.00203884
ENSG00000117143.13	UAP1	1281.19	-0.682684	0.183934	-3.71157	0.000205982	0.00205829
ENSG00000154310.16	TNIK	718.696	-0.601164	0.162052	-3.70969	0.000207514	0.00207243
ENSG00000167034.9	NKX3-1	14.8342	-3.18349	0.858428	-3.70851	0.000208483	0.00208092
ENSG00000272106.1	AL691432.2	263.963	-0.86628	0.233689	-3.70698	0.000209749	0.00209118
ENSG00000105227.14	PRX	104.307	-1.57859	0.425834	-3.70706	0.00020968	0.00209118
ENSG00000254996.5	ANKHD1-EIF4EBP3	343.88	1.2792	0.345262	3.70502	0.000211373	0.00210618
ENSG00000154265.15	ABCA5	212.29	1.10906	0.299641	3.70129	0.000214503	0.00213615
ENSG00000059145.18	UNKL	252.241	-0.917059	0.247778	-3.70113	0.000214644	0.00213634
ENSG00000174059.16	CD34	8524.06	2.11596	0.571972	3.69942	0.000216092	0.00214953
ENSG00000253910.2	PCDHGB2	441.291	0.810813	0.219209	3.69881	0.000216614	0.00215228
ENSG00000259479.6	SORD2P	813.122	-0.863005	0.233318	-3.69884	0.000216587	0.00215228
ENSG00000205542.10	TMSB4X	135943	0.531168	0.143705	3.69623	0.000218822	0.00217299
ENSG00000176014.12	TUBB6	17957.1	0.504141	0.13648	3.69388	0.000220857	0.00219197
ENSG00000100644.16	HIF1A	20750.5	0.467323	0.126681	3.68896	0.000225171	0.00223268
ENSG00000214872.8	SMTNL1	65.9875	1.85732	0.503507	3.68877	0.000225341	0.00223268
ENSG00000115641.18	FHL2	577.61	-0.901235	0.244311	-3.68888	0.000225239	0.00223268
ENSG00000231925.11	TAPBP	10236.1	-0.680334	0.184452	-3.6884	0.000225668	0.00223466
ENSG00000088881.20	EBF4	42.8259	-2.17631	0.590137	-3.6878	0.0002262	0.00223867
ENSG00000089057.14	SLC23A2	3207.5	0.64929	0.176089	3.68729	0.000226655	0.0022419
ENSG00000117620.14	SLC35A3	714.542	0.703556	0.190879	3.68588	0.000227915	0.0022531
ENSG00000182568.16	SATB1	473.07	-0.924358	0.250808	-3.68552	0.000228237	0.00225501
ENSG00000101782.14	RIOK3	4257.21	0.591295	0.160457	3.68506	0.000228651	0.00225673
ENSG00000116604.17	MEF2D	1380.21	-0.823767	0.223544	-3.68504	0.000228668	0.00225673
ENSG00000214357.8	NEURL1B	40.9186	2.19352	0.595284	3.68482	0.000228865	0.0022574
ENSG00000070193.4	FGF10	24.7369	-2.78616	0.756223	-3.68431	0.000229324	0.00226066
ENSG00000108828.15	VAT1	22656.8	0.58993	0.160148	3.68365	0.000229918	0.00226525
ENSG00000171208.9	NETO2	5916.09	0.582352	0.158123	3.6829	0.000230594	0.00227063
ENSG00000143515.16	ATP8B2	1316.64	-0.605671	0.164471	-3.68255	0.000230917	0.00227254
ENSG00000181826.9	RELL1	558.702	0.88626	0.2407	3.682	0.000231408	0.00227609
ENSG00000104131.12	EIF3J	3208.94	0.559564	0.151995	3.68146	0.0002319	0.00227966
ENSG00000075945.12	KIFAP3	4133.99	0.556382	0.151183	3.68019	0.000233061	0.00228978
ENSG00000237172.3	B3GNT9	39.2163	-2.39673	0.651514	-3.6787	0.000234423	0.00230188
ENSG00000115295.19	CLIP4	54.1134	-2.16709	0.589134	-3.67843	0.000234673	0.00230305
ENSG00000118257.16	NRP2	16249.4	1.04971	0.285456	3.67733	0.000235689	0.00231173
ENSG00000101134.11	DOK5	14.1127	-4.25862	1.1583	-3.67663	0.000236339	0.00231681
ENSG00000277586.2	NEFL	66.4251	-2.21302	0.601983	-3.67622	0.000236713	0.00231918
ENSG00000224109.3	CENPVL3	241.708	-0.900571	0.244993	-3.67591	0.000237005	0.00232074
ENSG00000162734.12	PEA15	6571.53	0.555853	0.151308	3.67366	0.000239102	0.00233998
ENSG00000197385.5	ZNF860	50.4921	1.98182	0.539521	3.6733	0.000239435	0.00234105
ENSG00000026950.16	BTN3A1	210.363	-1.13977	0.310289	-3.67326	0.000239479	0.00234105
ENSG00000137868.18	STRA6	32.3129	-3.53735	0.963226	-3.6724	0.000240282	0.00234759
ENSG00000198691.12	ABCA4	312.163	1.28363	0.34956	3.67214	0.000240532	0.00234873
ENSG00000197496.5	SLC2A10	1393.86	-0.644464	0.17554	-3.67133	0.000241294	0.00235486
ENSG00000197951.9	ZNF71	1687.13	0.633244	0.172569	3.66952	0.000243004	0.00237023
ENSG00000165806.19	CASP7	2134.63	0.664905	0.181244	3.66856	0.00024392	0.00237785
ENSG00000057657.16	PRDM1	1306.62	0.549348	0.149855	3.66586	0.000246505	0.00240172
ENSG00000175745.12	NR2F1	69.3908	-1.55563	0.424547	-3.66423	0.000248088	0.0024158
ENSG00000134548.10	SPX	14.1753	-4.63307	1.26446	-3.66408	0.000248227	0.00241581
ENSG00000090376.10	IRAK3	268.634	-0.900829	0.245968	-3.66238	0.000249882	0.00243057
ENSG00000139549.3	DHH	22.5289	-2.71874	0.742787	-3.66019	0.000252029	0.00245009
ENSG00000162066.15	AMDHD2	1055.33	1.04687	0.286068	3.65952	0.000252686	0.00245512
ENSG00000279117.1	AP001972.5	823.873	0.661825	0.180872	3.65909	0.000253114	0.00245792
ENSG00000182326.14	C1S	136.801	-1.84094	0.503153	-3.65881	0.000253392	0.00245926
ENSG00000138050.14	THUMPD2	238.643	0.862694	0.235892	3.65716	0.000255024	0.00247237
ENSG00000148053.15	NTRK2	46.814	-2.58874	0.707839	-3.65724	0.000254947	0.00247237
ENSG00000115946.7	PNO1	2091.87	0.529854	0.144913	3.65635	0.000255833	0.00247611
ENSG00000173166.17	RAPH1	855.52	0.835366	0.228462	3.65648	0.000255698	0.00247611
ENSG00000165816.12	VWA2	16.8855	5.28149	1.44442	3.65649	0.000255697	0.00247611
ENSG00000103415.11	HMOX2	3830.05	0.650412	0.177928	3.65548	0.000256701	0.00248314
ENSG00000128923.10	MINDY2	1275.62	0.486765	0.133211	3.6541	0.000258084	0.00249514
ENSG00000112983.17	BRD8	1409.79	-0.492807	0.134965	-3.65136	0.000260854	0.00252053
ENSG00000068001.13	HYAL2	25441.7	0.651537	0.178491	3.65026	0.000261978	0.00253
ENSG00000106976.20	DNM1	79.9529	-1.58182	0.433618	-3.64795	0.000264341	0.00255142
ENSG00000112679.14	DUSP22	1402.31	0.548297	0.150316	3.64763	0.000264667	0.00255316
ENSG00000152689.17	RASGRP3	6852.03	0.609384	0.167074	3.64739	0.000264918	0.00255419
ENSG00000175093.4	SPSB4	28.2278	-3.96057	1.08671	-3.64454	0.000267872	0.00258124
ENSG00000108924.13	HLF	13.8149	-4.43224	1.21645	-3.64357	0.000268883	0.00258956
ENSG00000134201.11	GSTM5	27.6831	-2.48595	0.682334	-3.6433	0.000269166	0.00259087
ENSG00000104938.16	CLEC4M	143.825	1.88675	0.518012	3.64228	0.00027023	0.00259969
ENSG00000156140.9	ADAMTS3	70.8279	-1.95984	0.538151	-3.64181	0.000270726	0.00260304
ENSG00000120278.16	PLEKHG1	6735.13	0.501159	0.137645	3.64096	0.000271626	0.00261026
ENSG00000103018.16	CYB5B	14403	0.591122	0.162434	3.63914	0.000273547	0.00262728
ENSG00000167772.11	ANGPTL4	932.818	-2.42208	0.666154	-3.63592	0.000276995	0.00265749
ENSG00000167487.11	KLHL26	128.579	-1.58631	0.43629	-3.63592	0.000276993	0.00265749
ENSG00000099866.14	MADCAM1	255.736	1.31404	0.36145	3.63547	0.00027747	0.00266059
ENSG00000278970.1	HEIH	312.745	-0.742234	0.204362	-3.63196	0.000281273	0.00269559
ENSG00000101928.12	MOSPD1	2176.04	0.589649	0.162378	3.63133	0.000281967	0.00269986
ENSG00000166923.10	GREM1	97.9945	-4.63065	1.27521	-3.63127	0.000282027	0.00269986
ENSG00000205730.6	ITPRIPL2	3036.57	-0.489749	0.134881	-3.63098	0.000282348	0.00270146
ENSG00000204386.10	NEU1	4570.16	0.503628	0.138711	3.63077	0.00028258	0.00270221
ENSG00000188153.13	COL4A5	5965.86	0.601639	0.165773	3.6293	0.000284194	0.00271616
ENSG00000119185.12	ITGB1BP1	2821.07	0.488475	0.134638	3.62805	0.000285572	0.00272785
ENSG00000167861.15	HID1	6955.08	0.717543	0.198045	3.62314	0.00029105	0.00277866
ENSG00000162543.5	UBXN10	104.236	1.14002	0.314815	3.62124	0.000293195	0.00279458
ENSG00000187323.11	DCC	99.3285	1.78674	0.493397	3.62131	0.000293119	0.00279458
ENSG00000145020.15	AMT	122.475	-1.14082	0.315035	-3.62124	0.000293194	0.00279458
ENSG00000213066.12	FGFR1OP	711.222	0.675571	0.186573	3.62096	0.000293517	0.00279614
ENSG00000154127.9	UBASH3B	531.1	-0.778157	0.215144	-3.61691	0.000298141	0.00283864
ENSG00000167601.11	AXL	901.949	-2.39273	0.661785	-3.61556	0.000299694	0.00285034
ENSG00000157077.14	ZFYVE9	620.52	-0.794335	0.219695	-3.61563	0.000299615	0.00285034
ENSG00000180318.3	ALX1	43.0643	2.13065	0.589747	3.61282	0.000302882	0.0028791
ENSG00000006282.20	SPATA20	383.382	-1.14731	0.317628	-3.61211	0.000303712	0.00288542
ENSG00000185737.12	NRG3	751.224	-0.84421	0.233856	-3.60995	0.000306251	0.00290798
ENSG00000124831.18	LRRFIP1	2831.69	0.463806	0.128524	3.6087	0.000307736	0.0029205
ENSG00000185515.14	BRCC3	1466.34	0.611097	0.169402	3.60738	0.000309303	0.00293378
ENSG00000132854.18	KANK4	9.68156	4.70731	1.3054	3.60603	0.000310914	0.00294747
ENSG00000172301.10	COPRS	1516.61	0.538605	0.149397	3.60519	0.00031193	0.00295551
ENSG00000111554.14	MDM1	406.334	0.756219	0.209785	3.60474	0.000312469	0.00295902
ENSG00000111339.11	ART4	281.79	-2.89383	0.803025	-3.60366	0.000313772	0.00296975
ENSG00000116641.17	DOCK7	1118.38	-0.846672	0.234965	-3.6034	0.000314082	0.00297109
ENSG00000260916.7	CCPG1	2914.6	-0.569971	0.15819	-3.60307	0.000314476	0.00297321
ENSG00000198171.12	DDRGK1	1718.6	0.613225	0.170218	3.60258	0.000315073	0.00297725
ENSG00000180611.6	MB21D2	242.927	-0.858623	0.238401	-3.60159	0.000316276	0.00298702
ENSG00000165312.6	OTUD1	962.844	-0.586698	0.162911	-3.60134	0.000316577	0.00298825
ENSG00000149499.11	EML3	1386.68	-0.532752	0.147969	-3.60042	0.000317705	0.00299568
ENSG00000143126.7	CELSR2	25.3389	-2.60454	0.723399	-3.60042	0.000317698	0.00299568
ENSG00000099290.16	WASHC2A	4326.71	0.559125	0.15545	3.5968	0.000322154	0.00303436
ENSG00000027001.9	MIPEP	1162.76	0.649723	0.180633	3.59692	0.000322009	0.00303436
ENSG00000260391.2	AC022336.2	14.3695	3.68846	1.0256	3.59639	0.000322659	0.0030375
ENSG00000233521.5	LINC01638	10.1262	-5.26751	1.46509	-3.59534	0.000323974	0.00304824
ENSG00000074211.13	PPP2R2C	12.9071	4.96557	1.3825	3.59173	0.00032849	0.00308908
ENSG00000105287.12	PRKD2	5762.81	0.624918	0.174212	3.58712	0.000334352	0.00314251
ENSG00000115652.14	UXS1	4017.44	0.590898	0.164743	3.58679	0.000334777	0.00314456
ENSG00000182919.14	C11orf54	1373.99	-0.533455	0.148733	-3.58667	0.000334928	0.00314456
ENSG00000125730.16	C3	54.4422	-3.01013	0.839432	-3.58591	0.000335906	0.00315206
ENSG00000168952.15	STXBP6	114.109	-1.78917	0.499106	-3.58476	0.000337394	0.00316433
ENSG00000203485.12	INF2	924.719	0.837354	0.23368	3.58333	0.000339241	0.00317996
ENSG00000104044.15	OCA2	14.1511	-5.4622	1.52464	-3.58262	0.000340162	0.00318689
ENSG00000111237.18	VPS29	3570.76	0.49623	0.138523	3.58231	0.000340574	0.00318905
ENSG00000117226.11	GBP3	108.595	-1.68404	0.470147	-3.58194	0.000341056	0.00319186
ENSG00000119977.20	TCTN3	5959.43	0.491683	0.137393	3.57867	0.000345348	0.0032303
ENSG00000111271.14	ACAD10	942.583	-0.566562	0.158335	-3.57825	0.000345907	0.00323381
ENSG00000139985.6	ADAM21	16.757	-2.70598	0.757165	-3.57383	0.0003518	0.00328715
ENSG00000119138.4	KLF9	18.9327	-3.00737	0.841697	-3.57299	0.00035293	0.00329595
ENSG00000168140.4	VASN	151.382	-4.92812	1.37985	-3.5715	0.000354945	0.00331301
ENSG00000196878.14	LAMB3	70.5812	-2.27579	0.637575	-3.56944	0.000357745	0.00333737
ENSG00000153404.14	PLEKHG4B	14.1939	-5.19791	1.45674	-3.56819	0.000359454	0.00335153
ENSG00000120915.13	EPHX2	388.296	-0.660759	0.185192	-3.56796	0.00035977	0.0033527
ENSG00000074047.21	GLI2	49.3425	-3.30881	0.927449	-3.56765	0.000360199	0.00335492
ENSG00000101670.11	LIPG	11401.8	-1.90767	0.534906	-3.56637	0.000361967	0.00336959
ENSG00000174791.10	RIN1	301.502	-0.955991	0.268126	-3.56545	0.000363231	0.00337957
ENSG00000189337.16	KAZN	464.619	-0.79428	0.222833	-3.56447	0.000364596	0.00339048
ENSG00000105204.13	DYRK1B	873.736	-0.734487	0.206069	-3.56427	0.000364874	0.00339126
ENSG00000151247.12	EIF4E	5871.37	0.477938	0.134104	3.56394	0.000365336	0.00339196
ENSG00000122696.13	SLC25A51	592.108	0.59908	0.168093	3.56399	0.000365263	0.00339196
ENSG00000007171.17	NOS2	25.4529	3.52574	0.990055	3.56116	0.000369218	0.00342552
ENSG00000130751.9	NPAS1	14.366	-3.90595	1.09685	-3.56107	0.00036934	0.00342552
ENSG00000089472.16	HEPH	4515.04	-0.484077	0.135967	-3.56027	0.00037048	0.00343427
ENSG00000104856.13	RELB	1047.33	0.557768	0.1567	3.55945	0.000371626	0.00344308
ENSG00000113296.14	THBS4	62.9723	-1.4203	0.39919	-3.55796	0.000373743	0.00346087
ENSG00000091490.10	SEL1L3	4336.52	0.855473	0.240478	3.55739	0.000374557	0.00346292
ENSG00000115541.10	HSPE1	4311.72	0.442495	0.124383	3.55753	0.000374364	0.00346292
ENSG00000117450.13	PRDX1	16238.8	-0.450663	0.126681	-3.55748	0.000374433	0.00346292
ENSG00000047621.11	C12orf4	793.1	0.692136	0.194626	3.55624	0.0003762	0.00347629
ENSG00000105472.12	CLEC11A	94.8922	-1.59221	0.447766	-3.55589	0.000376702	0.00347909
ENSG00000085733.15	CTTN	4575.73	0.44561	0.125335	3.55537	0.000377451	0.0034825
ENSG00000175906.4	ARL4D	275.34	-0.910815	0.256181	-3.55536	0.000377467	0.0034825
ENSG00000169902.14	TPST1	980.179	-0.731152	0.205699	-3.55448	0.000378731	0.00349232
ENSG00000166813.14	KIF7	180.514	-1.56463	0.440647	-3.55075	0.000384142	0.0035379
ENSG00000138744.14	NAAA	153.808	-1.07254	0.302067	-3.55068	0.00038423	0.0035379
ENSG00000126562.16	WNK4	64.3553	-2.48225	0.699096	-3.55065	0.000384279	0.0035379
ENSG00000184182.18	UBE2F	2734.97	0.458579	0.129165	3.55034	0.000384739	0.00354029
ENSG00000139880.19	CDH24	63.1032	-1.69659	0.477928	-3.54988	0.000385402	0.00354453
ENSG00000076716.8	GPC4	278.116	-1.24826	0.35168	-3.54943	0.000386072	0.00354883
ENSG00000166224.16	SGPL1	1493.42	-0.639671	0.18032	-3.54741	0.000389032	0.00357417
ENSG00000010322.15	NISCH	7551.18	0.51432	0.145065	3.54545	0.000391948	0.00359907
ENSG00000125257.14	ABCC4	1835.33	-0.623763	0.175967	-3.54476	0.000392965	0.00360653
ENSG00000136379.11	ABHD17C	249.84	-0.871067	0.245748	-3.54456	0.000393273	0.00360747
ENSG00000170915.8	PAQR8	2712.01	-0.758532	0.214012	-3.54434	0.000393601	0.0036086
ENSG00000150054.18	MPP7	75.9253	1.58575	0.447448	3.544	0.00039411	0.00361113
ENSG00000135298.13	ADGRB3	30.6555	-2.42975	0.685619	-3.54388	0.000394289	0.00361113
ENSG00000176887.6	SOX11	260.315	0.832074	0.234812	3.54358	0.000394739	0.00361148
ENSG00000103479.15	RBL2	2144.55	-0.69242	0.195395	-3.5437	0.000394555	0.00361148
ENSG00000171798.17	KNDC1	7.80324	-5.49501	1.55076	-3.54344	0.000394949	0.00361152
ENSG00000048991.16	R3HDM1	1524.81	0.488281	0.137911	3.54055	0.0003993	0.00364941
ENSG00000167315.17	ACAA2	3759.02	-0.595059	0.168092	-3.54009	0.000399994	0.00365384
ENSG00000104635.13	SLC39A14	2695.77	-0.695498	0.196527	-3.53895	0.000401722	0.00366773
ENSG00000113648.16	H2AFY	7159.22	0.411371	0.116277	3.53785	0.000403405	0.00368118
ENSG00000188517.15	COL25A1	3188.88	-0.926499	0.261903	-3.53757	0.000403829	0.00368313
ENSG00000139354.10	GAS2L3	249.856	0.954375	0.269807	3.53725	0.000404319	0.00368377
ENSG00000005102.12	MEOX1	10.0809	5.20138	1.47041	3.53736	0.000404141	0.00368377
ENSG00000158856.18	DMTN	280.926	0.877555	0.248171	3.53609	0.000406096	0.00369804
ENSG00000237928.5	NFIA-AS2	13.3597	3.56283	1.0078	3.53526	0.00040737	0.00370772
ENSG00000162630.5	B3GALT2	12.7361	-5.72034	1.61817	-3.53508	0.000407653	0.00370837
ENSG00000164054.15	SHISA5	16711.4	-0.633651	0.179254	-3.53494	0.000407873	0.00370845
ENSG00000101850.12	GPR143	1538.93	0.66736	0.188814	3.53448	0.000408583	0.00371299
ENSG00000249669.9	CARMN	41.3498	-2.68989	0.761093	-3.53425	0.000408934	0.00371426
ENSG00000107789.15	MINPP1	3695.21	-0.462493	0.130872	-3.53394	0.000409421	0.00371676
ENSG00000063601.16	MTMR1	966.308	-0.723817	0.204894	-3.53265	0.000411415	0.00373293
ENSG00000177556.11	ATOX1	2219.03	0.53769	0.152223	3.53224	0.000412049	0.00373675
ENSG00000063180.8	CA11	112.609	-1.3068	0.370029	-3.53161	0.00041304	0.0037438
ENSG00000227533.5	SLC2A1-AS1	20.0566	2.78737	0.789534	3.5304	0.000414929	0.00375898
ENSG00000145335.15	SNCA	3746.21	0.633822	0.179573	3.52962	0.000416164	0.00376822
ENSG00000280987.4	MATR3	1259.54	0.749248	0.212289	3.52937	0.000416546	0.00376974
ENSG00000177707.10	NECTIN3	500.659	-0.649931	0.184167	-3.52904	0.000417076	0.00377259
ENSG00000104369.4	JPH1	604.355	0.665966	0.188776	3.52781	0.000419006	0.0037881
ENSG00000160326.13	SLC2A6	2756.15	0.943197	0.267374	3.52763	0.000419299	0.00378879
ENSG00000183527.11	PSMG1	1364.55	0.487733	0.138292	3.52684	0.000420552	0.00379816
ENSG00000141002.19	TCF25	5526.71	0.449893	0.127589	3.52611	0.000421707	0.00380664
ENSG00000138246.16	DNAJC13	2294.09	0.646915	0.183512	3.52519	0.000423186	0.0038165
ENSG00000272799.1	AC006238.1	12.5317	-4.02063	1.14055	-3.52516	0.000423234	0.0038165
ENSG00000023287.12	RB1CC1	2313.43	-0.618884	0.175633	-3.52374	0.000425497	0.00383494
ENSG00000118855.18	MFSD1	2988.15	0.425442	0.120886	3.51937	0.000432573	0.0038967
ENSG00000041515.15	MYO16	9.38021	-5.34981	1.52067	-3.51806	0.000434713	0.00391397
ENSG00000165475.14	CRYL1	737.024	0.70909	0.201623	3.51691	0.000436609	0.00392904
ENSG00000107957.16	SH3PXD2A	545.69	1.12249	0.319383	3.51456	0.000440491	0.00396194
ENSG00000197879.16	MYO1C	9061.78	-0.580215	0.165127	-3.51374	0.000441846	0.00397209
ENSG00000105255.10	FSD1	328.629	-0.843216	0.240241	-3.50987	0.000448327	0.00402829
ENSG00000028277.21	POU2F2	188.456	1.01245	0.28849	3.50947	0.000449	0.00403227
ENSG00000130300.8	PLVAP	92750.9	-0.72867	0.207715	-3.50803	0.000451442	0.00405213
ENSG00000115414.18	FN1	174255	-0.994216	0.283509	-3.50683	0.000453484	0.00406838
ENSG00000179051.13	RCC2	7622.45	-0.497141	0.141861	-3.50442	0.000457603	0.00410324
ENSG00000154319.15	FAM167A	162.188	-3.94267	1.12544	-3.50322	0.000459678	0.00411974
ENSG00000109265.14	KIAA1211	116.624	1.07336	0.306534	3.50159	0.000462498	0.0041429
ENSG00000138074.14	SLC5A6	4605.75	0.471904	0.134944	3.49703	0.00047047	0.00421216
ENSG00000113583.7	C5orf15	2077.4	-0.534374	0.15291	-3.49469	0.000474606	0.00424702
ENSG00000116906.12	GNPAT	2859.34	0.509045	0.145727	3.49315	0.000477355	0.00426944
ENSG00000157657.14	ZNF618	542.707	-0.584953	0.167503	-3.49218	0.000479091	0.00428092
ENSG00000137269.14	LRRC1	370.64	-0.794947	0.227637	-3.49216	0.000479125	0.00428092
ENSG00000247809.7	NR2F2-AS1	20.5356	3.39469	0.972544	3.49053	0.000482063	0.00430498
ENSG00000130762.14	ARHGEF16	229.319	-0.990232	0.28378	-3.48943	0.000484044	0.00432047
ENSG00000273132.1	AL355312.3	7.03387	-6.0275	1.72753	-3.48908	0.00048468	0.00432394
ENSG00000090238.11	YPEL3	567.279	-0.859702	0.246468	-3.48809	0.000486484	0.00433783
ENSG00000172009.14	THOP1	2398.87	0.575097	0.164921	3.48711	0.000488273	0.00434937
ENSG00000185947.14	ZNF267	1401.53	0.57476	0.164821	3.48717	0.000488166	0.00434937
ENSG00000116991.10	SIPA1L2	5311.65	0.726524	0.208429	3.48572	0.000490823	0.00436765
ENSG00000103043.14	VAC14	3882.25	0.412881	0.118448	3.48576	0.000490743	0.00436765
ENSG00000139915.19	MDGA2	438.527	-1.59684	0.458186	-3.48515	0.000491865	0.00437471
ENSG00000166444.18	ST5	1302.74	0.553618	0.158891	3.48426	0.000493499	0.00438702
ENSG00000130270.16	ATP8B3	15.2509	-3.53075	1.01357	-3.48349	0.000494931	0.00439752
ENSG00000092010.14	PSME1	2674.55	-0.53244	0.152869	-3.48297	0.000495879	0.00440371
ENSG00000285000.1	AC008581.2	150.659	-1.29336	0.371378	-3.48259	0.000496582	0.00440773
ENSG00000173482.16	PTPRM	4305.9	0.429881	0.123509	3.48058	0.000500337	0.00443882
ENSG00000113319.12	RASGRF2	66.9236	-1.50729	0.433133	-3.47996	0.000501489	0.00444679
ENSG00000065675.14	PRKCQ	267.734	-0.842016	0.242012	-3.47923	0.000502851	0.00445662
ENSG00000136156.13	ITM2B	33441.4	-0.470886	0.135359	-3.47879	0.00050369	0.0044618
ENSG00000112237.12	CCNC	2630.35	0.50394	0.144872	3.47852	0.000504195	0.00446402
ENSG00000186827.10	TNFRSF4	29.0634	3.28882	0.945669	3.47777	0.000505602	0.00447422
ENSG00000115607.9	IL18RAP	13.541	-4.56305	1.31213	-3.47759	0.000505942	0.00447497
ENSG00000196843.15	ARID5A	480.722	-0.720116	0.207126	-3.47671	0.000507612	0.00448748
ENSG00000143815.14	LBR	8966.29	0.562113	0.161713	3.47599	0.000508977	0.00449729
ENSG00000171811.13	CFAP46	32.2069	-1.97762	0.569243	-3.47413	0.000512509	0.00452622
ENSG00000125538.11	IL1B	71.9623	1.89929	0.546877	3.47297	0.000514727	0.00454352
ENSG00000106868.16	SUSD1	1005.41	-0.536685	0.154575	-3.472	0.000516598	0.00455775
ENSG00000164850.14	GPER1	16.9272	-4.02005	1.15792	-3.4718	0.000516991	0.00455892
ENSG00000111252.10	SH2B3	10322.3	0.416251	0.119906	3.47147	0.000517621	0.00456218
ENSG00000136950.13	ARPC5L	3625.58	0.47974	0.138266	3.46968	0.000521075	0.00458802
ENSG00000196159.11	FAT4	847.543	-0.723073	0.208396	-3.4697	0.000521031	0.00458802
ENSG00000189079.15	ARID2	1005.15	-0.694236	0.200117	-3.46915	0.000522108	0.00459481
ENSG00000148926.9	ADM	2245.53	0.845446	0.243779	3.46808	0.000524186	0.00460848
ENSG00000227191.8	TRGC2	7.34251	5.98822	1.72664	3.46813	0.000524102	0.00460848
ENSG00000205268.10	PDE7A	995.222	0.504212	0.145463	3.46626	0.000527747	0.00463746
ENSG00000134285.10	FKBP11	87.1079	-1.98042	0.571482	-3.46542	0.000529408	0.00464973
[truncated: 56,722 more rows]

## Sheet: (B) p3CHIR_p3DMSO
gene	gene	baseMean	log2FoldChange	lfcSE	stat	pvalue	padj
ENSG00000164692.17	COL1A2	1681.14	-6.05798	0.364128	-16.6369	3.76461e-62	6.65357e-58
ENSG00000108821.13	COL1A1	3516.28	-6.79754	0.453338	-14.9944	7.98564e-51	7.05691e-47
ENSG00000130066.16	SAT1	31780.3	3.53386	0.264034	13.3841	7.48838e-41	4.41165e-37
ENSG00000154721.14	JAM2	323.495	6.54528	0.491864	13.3071	2.10524e-40	9.30202e-37
ENSG00000154096.13	THY1	710.145	-5.17557	0.394872	-13.107	3.00412e-39	1.0619e-35
ENSG00000106484.15	MEST	5696	-4.6283	0.366792	-12.6183	1.67336e-36	4.92916e-33
ENSG00000165959.11	CLMN	986.53	-3.72868	0.296355	-12.5818	2.65814e-36	6.71142e-33
ENSG00000172164.14	SNTB1	288.734	5.59136	0.459544	12.1672	4.64775e-34	1.0268e-30
ENSG00000175445.15	LPL	1221.06	4.96541	0.416309	11.9272	8.53955e-33	1.67698e-29
ENSG00000105699.16	LSR	676.528	4.71134	0.396023	11.8966	1.23221e-32	2.17781e-29
ENSG00000078596.10	ITM2A	5104.23	3.14184	0.269844	11.6432	2.4861e-31	3.99448e-28
ENSG00000125851.9	PCSK2	1629.96	4.7341	0.41762	11.3359	8.7127e-30	1.28324e-26
ENSG00000110811.19	P3H3	847.532	-3.39596	0.306316	-11.0864	1.45988e-28	1.98476e-25
ENSG00000106236.3	NPTX2	1093.3	-4.46448	0.405582	-11.0076	3.51297e-28	4.43487e-25
ENSG00000137726.16	FXYD6	731.579	-3.85096	0.359326	-10.7172	8.4544e-27	9.96154e-24
ENSG00000204291.10	COL15A1	1222.26	4.20653	0.392739	10.7108	9.06211e-27	1.00102e-23
ENSG00000138795.9	LEF1	218.125	6.18179	0.580846	10.6427	1.8854e-26	1.96015e-23
ENSG00000104368.17	PLAT	942.204	-3.55318	0.339089	-10.4786	1.08339e-25	1.06377e-22
ENSG00000011028.13	MRC2	299.302	-4.40704	0.424163	-10.39	2.75421e-25	2.56199e-22
ENSG00000164161.9	HHIP	1237.76	-4.34787	0.429745	-10.1173	4.62884e-24	4.09051e-21
ENSG00000140465.13	CYP1A1	6048.31	4.59612	0.457948	10.0363	1.05524e-23	8.8811e-21
ENSG00000180730.4	SHISA2	962.882	4.44535	0.443722	10.0183	1.26632e-23	1.01732e-20
ENSG00000180660.7	MAB21L1	230.009	4.8561	0.485652	9.99912	1.5375e-23	1.18147e-20
ENSG00000070731.10	ST6GALNAC2	237.212	-4.20329	0.420886	-9.98676	1.74175e-23	1.28265e-20
ENSG00000240694.8	PNMA2	175.714	-6.5471	0.669301	-9.782	1.34532e-22	9.51084e-20
ENSG00000198467.14	TPM2	2696.64	-4.57187	0.47162	-9.69397	3.19858e-22	2.17429e-19
ENSG00000174469.21	CNTNAP2	355.721	6.58061	0.679456	9.68512	3.48797e-22	2.2832e-19
ENSG00000168646.12	AXIN2	447.958	3.77905	0.390891	9.66778	4.13227e-22	2.60835e-19
ENSG00000165092.12	ALDH1A1	1815.82	4.42165	0.465266	9.50349	2.02976e-21	1.23703e-18
ENSG00000104998.3	IL27RA	317.049	-3.43468	0.364402	-9.42553	4.27931e-21	2.52108e-18
ENSG00000117394.21	SLC2A1	16111.2	3.59508	0.383377	9.3774	6.7622e-21	3.85533e-18
ENSG00000198535.5	C2CD4A	1225.97	-2.95318	0.315221	-9.36859	7.35067e-21	4.05987e-18
ENSG00000011422.11	PLAUR	3280.83	-2.62701	0.282946	-9.2845	1.62472e-20	8.54785e-18
ENSG00000112782.16	CLIC5	141.022	6.16793	0.664417	9.28322	1.64438e-20	8.54785e-18
ENSG00000241404.6	EGFL8	589.055	3.82763	0.428194	8.93902	3.92633e-19	1.98269e-16
ENSG00000114115.9	RBP1	2182.27	2.86234	0.3231	8.85899	8.07419e-19	3.96398e-16
ENSG00000151468.10	CCDC3	468.706	-4.96777	0.562865	-8.82586	1.08622e-18	5.18859e-16
ENSG00000176463.13	SLCO3A1	646.666	-3.05553	0.346557	-8.8168	1.17778e-18	5.47791e-16
ENSG00000155792.9	DEPTOR	873.963	-2.80896	0.31893	-8.80744	1.28038e-18	5.80243e-16
ENSG00000116285.12	ERRFI1	2638.64	-2.58295	0.294104	-8.78245	1.59957e-18	7.06769e-16
ENSG00000129682.15	FGF13	310.023	3.17628	0.367543	8.64193	5.52704e-18	2.38256e-15
ENSG00000143333.6	RGS16	497.334	4.79332	0.557544	8.59721	8.16777e-18	3.43707e-15
ENSG00000157502.13	MUM1L1	368.313	3.04706	0.359919	8.46596	2.54052e-17	1.04421e-14
ENSG00000158246.7	TENT5B	917.177	-3.12075	0.371374	-8.40324	4.34316e-17	1.73457e-14
ENSG00000185585.19	OLFML2A	367.883	4.4848	0.533824	8.40128	4.41642e-17	1.73457e-14
ENSG00000102760.12	RGCC	3127.02	2.22468	0.265541	8.37792	5.387e-17	2.06978e-14
ENSG00000148908.14	RGS10	1337.55	3.13437	0.376283	8.32981	8.09702e-17	3.04483e-14
ENSG00000113657.12	DPYSL3	1310.47	-2.51181	0.303698	-8.27076	1.3311e-16	4.90123e-14
ENSG00000110002.15	VWA5A	3216.88	-2.34864	0.286559	-8.196	2.48515e-16	8.78452e-14
ENSG00000244509.3	APOBEC3C	419.436	-3.10758	0.379081	-8.19767	2.45085e-16	8.78452e-14
ENSG00000166963.12	MAP1A	395.143	-2.78139	0.33968	-8.18825	2.65041e-16	9.18497e-14
ENSG00000141736.13	ERBB2	182.329	-3.41914	0.422836	-8.08619	6.15607e-16	2.09236e-13
ENSG00000134470.20	IL15RA	395.889	-2.74862	0.342286	-8.03017	9.73397e-16	3.246e-13
ENSG00000142156.14	COL6A1	664.798	-2.62772	0.328104	-8.00881	1.15822e-15	3.79082e-13
ENSG00000226197.2	AL583785.1	109.034	6.51028	0.813365	8.00413	1.20314e-15	3.86623e-13
ENSG00000167772.11	ANGPTL4	610.503	-2.90426	0.364082	-7.97694	1.5001e-15	4.73441e-13
ENSG00000042980.12	ADAM28	146.814	4.94672	0.620964	7.96618	1.63648e-15	5.07425e-13
ENSG00000134802.17	SLC43A3	4615.41	-2.21371	0.278844	-7.93886	2.04049e-15	6.11247e-13
ENSG00000147813.15	NAPRT	785.222	-2.76052	0.347661	-7.94027	2.01738e-15	6.11247e-13
ENSG00000116667.13	C1orf21	994.896	-2.39916	0.303347	-7.90894	2.59584e-15	7.64647e-13
ENSG00000157152.16	SYN2	234.261	4.4845	0.567181	7.90666	2.64386e-15	7.66025e-13
ENSG00000120885.21	CLU	1761.13	-2.25253	0.287462	-7.83592	4.65416e-15	1.32674e-12
ENSG00000142227.10	EMP3	300.53	-3.88346	0.498299	-7.79344	6.52112e-15	1.82943e-12
ENSG00000116132.11	PRRX1	137.219	5.69401	0.735181	7.74505	9.55478e-15	2.63861e-12
ENSG00000133101.9	CCNA1	242.441	-3.38166	0.438755	-7.7074	1.2841e-14	3.49158e-12
ENSG00000128591.15	FLNC	334.49	-2.86841	0.372492	-7.70059	1.35435e-14	3.62679e-12
ENSG00000026508.18	CD44	4862.14	-3.28728	0.427186	-7.6952	1.41278e-14	3.72679e-12
ENSG00000225968.7	ELFN1	93.3609	-5.6341	0.733444	-7.6817	1.56991e-14	4.08039e-12
ENSG00000159307.18	SCUBE1	396.703	3.11092	0.406584	7.65134	1.98894e-14	5.09456e-12
ENSG00000170421.12	KRT8	2229.83	-2.86643	0.379315	-7.55686	4.12919e-14	1.02788e-11
ENSG00000213886.3	UBD	181.745	5.23804	0.692983	7.55868	4.07187e-14	1.02788e-11
ENSG00000196329.11	GIMAP5	714.766	3.36443	0.446844	7.52933	5.10026e-14	1.25197e-11
ENSG00000177191.2	B3GNT8	132.671	-5.28612	0.702552	-7.52418	5.3054e-14	1.28449e-11
ENSG00000172716.16	SLFN11	421.693	-3.80066	0.50574	-7.51504	5.68925e-14	1.35881e-11
ENSG00000101306.10	MYLK2	541.37	2.48271	0.33076	7.50607	6.09302e-14	1.43584e-11
ENSG00000184611.11	KCNH7	310.222	-3.06509	0.408741	-7.49886	6.43729e-14	1.49701e-11
ENSG00000169418.9	NPR1	2123.12	-3.38585	0.454385	-7.4515	9.22861e-14	2.11827e-11
ENSG00000071967.11	CYBRD1	248.768	-3.33633	0.448597	-7.43725	1.02803e-13	2.32942e-11
ENSG00000133466.13	C1QTNF6	1836.13	-2.08278	0.280468	-7.42608	1.11865e-13	2.50266e-11
ENSG00000270547.5	LINC01235	769.974	3.71102	0.505487	7.34147	2.1126e-13	4.66727e-11
ENSG00000205213.13	LGR4	1599.49	-2.43836	0.333752	-7.3059	2.75409e-13	6.00935e-11
ENSG00000063438.16	AHRR	270.419	3.9898	0.546937	7.2948	2.99111e-13	6.44693e-11
ENSG00000177706.8	FAM20C	73.8605	-9.61901	1.31948	-7.28999	3.09968e-13	6.60044e-11
ENSG00000163702.19	IL17RC	182.56	-3.40954	0.471459	-7.23189	4.76326e-13	1.00221e-10
ENSG00000180440.3	SERTM1	117.167	-3.56589	0.494126	-7.21657	5.33149e-13	1.10857e-10
ENSG00000103460.16	TOX3	111.165	6.28969	0.875831	7.18139	6.90045e-13	1.41812e-10
ENSG00000155254.12	MARVELD1	845.613	-2.1341	0.297423	-7.1753	7.21473e-13	1.46567e-10
ENSG00000124233.11	SEMG1	248.897	-3.19831	0.446483	-7.16335	7.87283e-13	1.58119e-10
ENSG00000100368.13	CSF2RB	1410.6	-1.98629	0.277688	-7.15298	8.49164e-13	1.68631e-10
ENSG00000005884.17	ITGA3	2973.79	-2.07291	0.290003	-7.14789	8.8125e-13	1.73058e-10
ENSG00000115602.16	IL1RL1	117.253	-5.19538	0.729029	-7.12645	1.02992e-12	2.00031e-10
ENSG00000060656.19	PTPRU	1173.79	-2.50619	0.353151	-7.09664	1.27829e-12	2.45571e-10
ENSG00000163092.19	XIRP2	566.298	2.43261	0.342928	7.09364	1.30629e-12	2.4561e-10
ENSG00000196209.12	SIRPB2	746.369	2.36623	0.333515	7.09483	1.29512e-12	2.4561e-10
ENSG00000154856.12	APCDD1	4337.95	7.284	1.03014	7.07086	1.53976e-12	2.86459e-10
ENSG00000132182.11	NUP210	393.583	-3.96907	0.563707	-7.04101	1.90847e-12	3.51357e-10
ENSG00000168209.4	DDIT4	3419.67	1.86364	0.265907	7.00862	2.40687e-12	4.38547e-10
ENSG00000145147.19	SLIT2	3648.95	-2.14396	0.306262	-7.00041	2.55219e-12	4.6028e-10
ENSG00000101335.9	MYL9	1744	-2.66835	0.381576	-6.99297	2.69129e-12	4.80463e-10
ENSG00000171227.6	TMEM37	1165.61	2.50577	0.361741	6.92699	4.29883e-12	7.59775e-10
ENSG00000024422.11	EHD2	11482.3	-2.32634	0.336317	-6.91711	4.6095e-12	8.06616e-10
ENSG00000130940.14	CASZ1	108.923	4.14792	0.600193	6.91098	4.8131e-12	8.33988e-10
ENSG00000057704.12	TMCC3	5921.64	-2.09918	0.305043	-6.88158	5.91922e-12	1.00694e-09
ENSG00000283632.2	EXOC3L2	1131.09	-1.95837	0.284587	-6.88144	5.92521e-12	1.00694e-09
ENSG00000171951.4	SCG2	158.455	-3.67982	0.538369	-6.83513	8.19307e-12	1.37909e-09
ENSG00000001617.11	SEMA3F	129.447	-3.28442	0.481357	-6.82326	8.89963e-12	1.47002e-09
ENSG00000113721.13	PDGFRB	67.2203	-7.37279	1.08042	-6.82398	8.85524e-12	1.47002e-09
ENSG00000114626.17	ABTB1	120.84	-3.30308	0.48432	-6.82003	9.1024e-12	1.48959e-09
ENSG00000205221.12	VIT	63.0819	9.16989	1.34528	6.81636	9.33791e-12	1.51411e-09
ENSG00000244274.7	DBNDD2	285.396	-2.65333	0.389658	-6.80938	9.80213e-12	1.57494e-09
ENSG00000132031.12	MATN3	271.525	3.6589	0.53813	6.79929	1.05135e-11	1.67402e-09
ENSG00000074416.14	MGLL	127.863	-4.05386	0.59781	-6.78119	1.19193e-11	1.86426e-09
ENSG00000182307.13	C8orf33	8775.76	-1.82554	0.269187	-6.78168	1.1879e-11	1.86426e-09
ENSG00000113083.13	LOX	673.723	-3.68317	0.543399	-6.77803	1.21828e-11	1.88876e-09
ENSG00000168140.4	VASN	76.0378	-6.14315	0.908497	-6.76188	1.3621e-11	2.09337e-09
ENSG00000130635.15	COL5A1	4060.5	-2.0083	0.297242	-6.75645	1.41409e-11	2.13613e-09
ENSG00000183873.15	SCN5A	117.218	-3.56365	0.527433	-6.7566	1.4127e-11	2.13613e-09
ENSG00000183098.10	GPC6	1325.42	-2.45375	0.366336	-6.69807	2.11191e-11	3.16322e-09
ENSG00000175344.17	CHRNA7	1026.77	2.37609	0.356435	6.66626	2.62408e-11	3.89731e-09
ENSG00000138678.10	GPAT3	171.313	-3.24938	0.487748	-6.662	2.7013e-11	3.97856e-09
ENSG00000124920.13	MYRF	81.2903	-4.71267	0.708049	-6.65585	2.81664e-11	4.08831e-09
ENSG00000134668.12	SPOCD1	101.514	-4.21471	0.633261	-6.65557	2.82207e-11	4.08831e-09
ENSG00000111885.6	MAN1A1	3120.88	2.10059	0.316756	6.63156	3.32161e-11	4.77286e-09
ENSG00000071205.11	ARHGAP10	584.433	-2.57156	0.388065	-6.62662	3.43458e-11	4.89539e-09
ENSG00000166960.16	CCDC178	770.675	2.12944	0.322537	6.60216	4.05199e-11	5.72918e-09
ENSG00000173083.14	HPSE	119.575	-4.12563	0.625669	-6.59395	4.28285e-11	6.00755e-09
ENSG00000143195.12	ILDR2	71.4435	5.30313	0.804868	6.58882	4.43326e-11	6.16956e-09
ENSG00000174807.3	CD248	63.7879	-8.72897	1.32554	-6.58521	4.54235e-11	6.27199e-09
ENSG00000182168.14	UNC5C	196.795	-2.92557	0.444363	-6.58375	4.58741e-11	6.28511e-09
ENSG00000169604.19	ANTXR1	816.135	-2.0284	0.308404	-6.57708	4.79787e-11	6.52289e-09
ENSG00000096433.10	ITPR3	2064.54	-2.0862	0.31736	-6.57361	4.9111e-11	6.62586e-09
ENSG00000148053.15	NTRK2	198.977	-2.81526	0.428752	-6.56617	5.16265e-11	6.91248e-09
ENSG00000158683.8	PKD1L1	265.247	2.55784	0.389688	6.56383	5.24434e-11	6.96906e-09
ENSG00000170011.13	MYRIP	83.1741	8.08026	1.23407	6.54765	5.84481e-11	7.70904e-09
ENSG00000165449.11	SLC16A9	215.159	-3.86706	0.590839	-6.54503	5.94842e-11	7.78758e-09
ENSG00000108679.12	LGALS3BP	287.003	-4.20315	0.642394	-6.54296	6.03146e-11	7.83824e-09
ENSG00000132622.10	HSPA12B	114.43	-3.25053	0.49691	-6.54149	6.09084e-11	7.85763e-09
ENSG00000143850.14	PLEKHA6	47.6807	-8.98606	1.37477	-6.53642	6.30108e-11	8.06994e-09
ENSG00000125798.14	FOXA2	49.3591	8.9258	1.37278	6.50197	7.92764e-11	1.00801e-08
ENSG00000080573.6	COL5A3	276.601	-3.48037	0.535543	-6.49878	8.09735e-11	1.02223e-08
ENSG00000106624.10	AEBP1	388.87	-2.31491	0.357165	-6.48135	9.09083e-11	1.13951e-08
ENSG00000154589.6	LY96	337.908	2.29413	0.355048	6.46146	1.03695e-10	1.29064e-08
ENSG00000150471.16	ADGRL3	787.522	-2.07579	0.324067	-6.40544	1.4994e-10	1.85317e-08
ENSG00000228592.1	D21S2088E	532.467	2.00903	0.315106	6.37572	1.821e-10	2.23503e-08
ENSG00000164867.10	NOS3	2260.64	-2.31096	0.362559	-6.37402	1.84136e-10	2.24442e-08
ENSG00000128510.11	CPA4	151.805	-4.43351	0.697288	-6.35821	2.04115e-10	2.4709e-08
ENSG00000184916.8	JAG2	2484.91	1.95869	0.308334	6.35248	2.11865e-10	2.54729e-08
ENSG00000122641.10	INHBA	2963.63	2.88481	0.454422	6.34831	2.17695e-10	2.59969e-08
ENSG00000105612.8	DNASE2	467.369	-2.22943	0.352276	-6.32864	2.47338e-10	2.93386e-08
ENSG00000124145.6	SDC4	115.673	-3.86965	0.612223	-6.32066	2.60449e-10	3.06878e-08
ENSG00000157613.10	CREB3L1	906.185	-2.17934	0.345086	-6.31534	2.69565e-10	3.15517e-08
ENSG00000184831.13	APOO	2094.48	1.8149	0.287593	6.31065	2.77872e-10	3.231e-08
ENSG00000205336.11	ADGRG1	780.459	-2.00159	0.318209	-6.29017	3.17121e-10	3.66327e-08
ENSG00000100060.17	MFNG	9808.51	1.71765	0.273244	6.28613	3.25478e-10	3.73539e-08
ENSG00000145198.14	VWA5B2	162.732	3.8996	0.621204	6.27749	3.44087e-10	3.92348e-08
ENSG00000005073.5	HOXA11	345.008	2.26697	0.362494	6.25382	4.00533e-10	4.53784e-08
ENSG00000176907.4	TCIM	715.939	2.49779	0.399642	6.25005	4.10309e-10	4.61898e-08
ENSG00000181031.15	RPH3AL	173.757	-2.65712	0.425473	-6.2451	4.23537e-10	4.73772e-08
ENSG00000108691.9	CCL2	17239.4	2.23394	0.358838	6.22548	4.80087e-10	5.33651e-08
ENSG00000101115.12	SALL4	106.273	4.3153	0.694927	6.20971	5.30818e-10	5.86355e-08
ENSG00000117152.13	RGS4	137.415	-3.86887	0.62426	-6.19752	5.73591e-10	6.29667e-08
ENSG00000137809.16	ITGA11	1145.25	2.74973	0.443994	6.19316	5.89692e-10	6.43347e-08
ENSG00000174669.11	SLC29A2	308.009	-2.52614	0.408845	-6.17872	6.46242e-10	7.00716e-08
ENSG00000127824.13	TUBA4A	276.72	-2.88591	0.468464	-6.16036	7.25776e-10	7.82156e-08
ENSG00000175899.14	A2M	7752.51	2.11189	0.344393	6.13221	8.66658e-10	9.28322e-08
ENSG00000074964.16	ARHGEF10L	132.619	-3.48786	0.569399	-6.12552	9.03882e-10	9.62362e-08
ENSG00000164023.14	SGMS2	470.321	-3.23891	0.53146	-6.09436	1.09879e-09	1.16288e-07
ENSG00000099337.4	KCNK6	549.171	-1.99624	0.329964	-6.04987	1.44964e-09	1.52506e-07
ENSG00000063660.8	GPC1	485.878	-2.16962	0.359564	-6.03404	1.59908e-09	1.66248e-07
ENSG00000226409.2	AL450332.1	82.4335	-3.48552	0.577617	-6.03432	1.59634e-09	1.66248e-07
ENSG00000162878.12	PKDCC	359.561	-2.21718	0.367991	-6.0251	1.69008e-09	1.74681e-07
ENSG00000110697.12	PITPNM1	669.089	-2.496	0.414345	-6.02395	1.70209e-09	1.74899e-07
ENSG00000158270.11	COLEC12	8615.05	-1.61593	0.268629	-6.01548	1.7936e-09	1.83237e-07
ENSG00000145794.16	MEGF10	245.128	-3.41123	0.570238	-5.98211	2.20263e-09	2.23731e-07
ENSG00000285330.1	AC126283.2	34.4763	8.56502	1.4328	5.97782	2.26139e-09	2.28387e-07
ENSG00000013725.14	CD6	64.3394	-3.92285	0.658406	-5.9581	2.55189e-09	2.56262e-07
ENSG00000106688.11	SLC1A1	111.533	-3.12719	0.525696	-5.94866	2.7034e-09	2.69942e-07
ENSG00000129038.15	LOXL1	529.781	-2.06735	0.347746	-5.94499	2.76468e-09	2.74511e-07
ENSG00000152092.15	ASTN1	547.063	-2.04441	0.344397	-5.93621	2.91694e-09	2.88011e-07
ENSG00000141293.15	SKAP1	221.827	2.34452	0.39509	5.93413	2.95413e-09	2.89027e-07
ENSG00000164647.8	STEAP1	855.195	-1.82715	0.307922	-5.93381	2.95993e-09	2.89027e-07
ENSG00000169515.6	CCDC8	49.6311	-4.74446	0.799756	-5.93238	2.98573e-09	2.89944e-07
ENSG00000154027.18	AK5	1217.43	-2.66069	0.449344	-5.92128	3.19453e-09	3.08525e-07
ENSG00000274588.1	DGKK	353.821	-3.38926	0.572822	-5.91677	3.28318e-09	3.15364e-07
ENSG00000175093.4	SPSB4	33.6376	-8.47795	1.43721	-5.8989	3.65934e-09	3.49596e-07
ENSG00000154016.13	GRAP	4242.62	1.59476	0.27075	5.89014	3.85876e-09	3.66665e-07
ENSG00000186193.8	SAPCD2	262.878	-2.67842	0.455474	-5.8805	4.09033e-09	3.86591e-07
ENSG00000233056.2	ERVH48-1	43.7932	7.32722	1.25227	5.85114	4.88201e-09	4.58961e-07
ENSG00000003096.14	KLHL13	1393.91	-2.4431	0.418345	-5.83992	5.22262e-09	4.88384e-07
ENSG00000106714.17	CNTNAP3	285.71	2.13004	0.364906	5.83723	5.3076e-09	4.93718e-07
ENSG00000115194.10	SLC30A3	1041.14	-2.85477	0.490613	-5.81879	5.92741e-09	5.48487e-07
ENSG00000115232.13	ITGA4	1590.84	-2.54536	0.437976	-5.81164	6.18638e-09	5.69469e-07
ENSG00000160447.6	PKN3	208.404	-2.64733	0.455758	-5.80862	6.29892e-09	5.76825e-07
ENSG00000143416.20	SELENBP1	144.37	-2.64468	0.456417	-5.79444	6.85492e-09	6.24505e-07
ENSG00000167900.11	TK1	2237.16	-1.79827	0.31087	-5.78464	7.2669e-09	6.58642e-07
ENSG00000129195.15	PIMREG	400.705	-2.0976	0.3635	-5.77057	7.90033e-09	7.124e-07
ENSG00000185518.11	SV2B	523.271	2.08515	0.361416	5.76939	7.95611e-09	7.13788e-07
ENSG00000122861.15	PLAU	1169.6	-2.37578	0.412373	-5.76123	8.35012e-09	7.43183e-07
ENSG00000211689.7	TRGC1	32.0537	8.35491	1.45028	5.76088	8.36785e-09	7.43183e-07
ENSG00000182326.14	C1S	57.8825	-4.03507	0.700591	-5.75952	8.43556e-09	7.4545e-07
ENSG00000100234.11	TIMP3	39429.9	-1.71992	0.299131	-5.7497	8.94035e-09	7.86128e-07
ENSG00000102934.9	PLLP	1297.75	1.8598	0.323821	5.74328	9.28584e-09	8.12465e-07
ENSG00000172201.11	ID4	1194.61	-2.15642	0.375677	-5.74008	9.46314e-09	8.239e-07
ENSG00000154553.14	PDLIM3	116.139	-3.05084	0.533668	-5.71673	1.08591e-08	9.40803e-07
ENSG00000137841.11	PLCB2	759.796	-1.69397	0.296824	-5.70699	1.14994e-08	9.8937e-07
ENSG00000187323.11	DCC	196.25	2.63114	0.461077	5.70651	1.15316e-08	9.8937e-07
ENSG00000137473.17	TTC29	548.599	1.79551	0.314698	5.70549	1.16012e-08	9.9053e-07
ENSG00000131459.12	GFPT2	208.957	-2.6085	0.457655	-5.69971	1.20008e-08	1.01972e-06
ENSG00000178999.12	AURKB	646.077	-1.89138	0.332124	-5.69481	1.23512e-08	1.04448e-06
ENSG00000108688.11	CCL7	101.656	-3.5181	0.621574	-5.65999	1.51386e-08	1.27409e-06
ENSG00000174938.14	SEZ6L2	245.44	-2.30416	0.407177	-5.65886	1.52378e-08	1.27637e-06
ENSG00000164619.9	BMPER	213.717	-2.18388	0.386209	-5.65467	1.56144e-08	1.30174e-06
ENSG00000069011.15	PITX1	54.4103	-5.26768	0.931998	-5.65202	1.58569e-08	1.3096e-06
ENSG00000134531.9	EMP1	9601.79	-1.48783	0.263202	-5.65279	1.57862e-08	1.3096e-06
ENSG00000149403.12	GRIK4	104.277	3.35051	0.594047	5.64014	1.6991e-08	1.39674e-06
ENSG00000171848.14	RRM2	4051.52	-1.95969	0.347694	-5.63626	1.73783e-08	1.42196e-06
ENSG00000120256.10	LRP11	325.97	-2.30657	0.409505	-5.63258	1.77537e-08	1.44599e-06
ENSG00000149212.11	SESN3	904.747	1.69758	0.302401	5.61368	1.98063e-08	1.60577e-06
ENSG00000172175.13	MALT1	837.098	2.24713	0.40169	5.59418	2.21667e-08	1.78893e-06
ENSG00000138744.14	NAAA	265.768	-2.05584	0.367991	-5.58666	2.31474e-08	1.85358e-06
ENSG00000168497.4	CAVIN2	4625.81	2.12631	0.380621	5.58644	2.31776e-08	1.85358e-06
ENSG00000134986.13	NREP	9844.51	1.73528	0.311245	5.57529	2.47118e-08	1.96737e-06
ENSG00000088543.14	C3orf18	122.739	-2.73742	0.491385	-5.57082	2.53537e-08	2.00943e-06
ENSG00000102007.10	PLP2	834.073	-2.1584	0.387886	-5.56452	2.62876e-08	2.07414e-06
ENSG00000179348.11	GATA2	413.858	2.3271	0.418821	5.55632	2.75523e-08	2.16427e-06
ENSG00000164330.16	EBF1	589.787	1.74145	0.313878	5.54818	2.88654e-08	2.25737e-06
ENSG00000170293.8	CMTM8	242.643	2.09413	0.377772	5.54337	2.96711e-08	2.31016e-06
ENSG00000166073.10	GPR176	92.2234	-3.63064	0.655129	-5.54187	2.99256e-08	2.31976e-06
ENSG00000237988.5	OR2I1P	42.1099	7.56011	1.36548	5.53658	3.08434e-08	2.38046e-06
ENSG00000100196.10	KDELR3	1145.31	-1.58389	0.286276	-5.53273	3.15279e-08	2.4019e-06
ENSG00000150556.16	LYPD6B	121.363	-3.24894	0.587214	-5.5328	3.15159e-08	2.4019e-06
ENSG00000271447.5	MMP28	779.749	2.13062	0.385093	5.53273	3.15289e-08	2.4019e-06
ENSG00000168077.13	SCARA3	87.3884	-3.98887	0.721423	-5.52917	3.21745e-08	2.44057e-06
ENSG00000166741.7	NNMT	1353.05	-2.14066	0.387409	-5.52557	3.28417e-08	2.47736e-06
ENSG00000248890.1	HHIP-AS1	116.769	-2.90598	0.525965	-5.52505	3.29399e-08	2.47736e-06
ENSG00000164687.10	FABP5	11994.9	1.88459	0.341162	5.52405	3.31271e-08	2.48088e-06
ENSG00000130294.16	KIF1A	1024.34	1.84681	0.334448	5.52197	3.35211e-08	2.4998e-06
ENSG00000078053.16	AMPH	277.997	-3.26179	0.590893	-5.5201	3.38809e-08	2.51601e-06
ENSG00000140092.14	FBLN5	66.4379	-5.18519	0.940061	-5.5158	3.47195e-08	2.5675e-06
ENSG00000111110.11	PPM1H	1323.35	1.79771	0.326309	5.50923	3.60397e-08	2.65402e-06
ENSG00000118785.13	SPP1	81.4425	-4.87972	0.885959	-5.50784	3.63259e-08	2.664e-06
ENSG00000235162.8	C12orf75	467.907	-1.89319	0.344708	-5.49214	3.9709e-08	2.90007e-06
ENSG00000129226.13	CD68	46.4964	-5.56177	1.01297	-5.49054	4.00704e-08	2.91442e-06
ENSG00000188158.15	NHS	243.138	2.11467	0.385318	5.48813	4.06215e-08	2.94239e-06
ENSG00000250510.7	GPR162	49.8714	-5.02614	0.916536	-5.48385	4.16177e-08	3.00225e-06
ENSG00000197956.9	S100A6	2182.53	-2.67797	0.490147	-5.46361	4.66544e-08	3.35191e-06
ENSG00000109743.10	BST1	527.284	2.07313	0.380622	5.44668	5.13195e-08	3.67215e-06
ENSG00000144857.14	BOC	94.1502	-2.80396	0.516154	-5.4324	5.56009e-08	3.96246e-06
ENSG00000166979.12	EVA1C	510.943	-1.71047	0.315217	-5.42633	5.75256e-08	4.08316e-06
ENSG00000144057.15	ST6GAL2	614.475	-1.6836	0.310395	-5.42406	5.82617e-08	4.11887e-06
ENSG00000006210.6	CX3CL1	163.36	2.50893	0.462855	5.42056	5.9413e-08	4.13873e-06
ENSG00000120594.16	PLXDC2	953.873	-1.74964	0.32279	-5.42036	5.94793e-08	4.13873e-06
ENSG00000123485.11	HJURP	632.844	-2.08122	0.383917	-5.42102	5.92614e-08	4.13873e-06
ENSG00000159176.13	CSRP1	6251.59	-1.4449	0.266466	-5.42245	5.8786e-08	4.13873e-06
ENSG00000169248.12	CXCL11	149.54	2.43581	0.450484	5.40709	6.40554e-08	4.43967e-06
ENSG00000184156.16	KCNQ3	194.707	-2.84002	0.526179	-5.39744	6.75966e-08	4.66681e-06
ENSG00000100297.15	MCM5	1753.99	-1.88638	0.349594	-5.39591	6.81758e-08	4.68848e-06
ENSG00000234964.4	FABP5P7	3110.87	1.89476	0.351843	5.38526	7.23404e-08	4.9556e-06
ENSG00000137491.14	SLCO2B1	39.1026	6.69517	1.24571	5.3746	7.67548e-08	5.2377e-06
ENSG00000125384.6	PTGER2	30.8338	-7.70239	1.43343	-5.37341	7.72635e-08	5.25213e-06
ENSG00000105963.14	ADAP1	65.5073	-3.41228	0.635754	-5.36729	7.99289e-08	5.4125e-06
ENSG00000197705.9	KLHL14	325.711	9.25074	1.72479	5.36341	8.16655e-08	5.50899e-06
ENSG00000134072.10	CAMK1	469.379	-1.83132	0.341582	-5.36128	8.26326e-08	5.55303e-06
ENSG00000127241.16	MASP1	437.35	-2.19161	0.409681	-5.34957	8.81648e-08	5.90237e-06
ENSG00000104415.14	WISP1	73.7763	-4.19228	0.784788	-5.34192	9.19655e-08	6.13358e-06
ENSG00000148600.14	CDHR1	38.6712	-6.95065	1.30445	-5.32843	9.90648e-08	6.58222e-06
ENSG00000163630.10	SYNPR	43.1658	6.02553	1.1313	5.32622	1.00275e-07	6.63768e-06
ENSG00000145649.7	GZMA	107.659	2.82528	0.531811	5.31256	1.08098e-07	7.12884e-06
ENSG00000125148.6	MT2A	382.389	-2.88498	0.545144	-5.29214	1.20896e-07	7.94317e-06
ENSG00000120833.13	SOCS2	845.711	1.54516	0.292469	5.28315	1.2698e-07	8.31202e-06
ENSG00000151414.14	NEK7	1419.59	-1.64536	0.311784	-5.27726	1.31131e-07	8.55204e-06
ENSG00000176485.11	PLA2G16	236.131	-2.02891	0.384824	-5.27231	1.3472e-07	8.75386e-06
ENSG00000167755.14	KLK6	80.3646	-3.56252	0.675958	-5.27033	1.3618e-07	8.81628e-06
ENSG00000136999.4	NOV	196.717	2.25848	0.429282	5.26107	1.43222e-07	9.23831e-06
ENSG00000109113.19	RAB34	348.853	-1.87352	0.358019	-5.23302	1.66767e-07	1.07179e-05
ENSG00000115107.19	STEAP3	109.637	-2.59583	0.496272	-5.23065	1.68913e-07	1.08165e-05
ENSG00000174059.16	CD34	32704.4	1.51602	0.290339	5.22157	1.77416e-07	1.132e-05
ENSG00000171724.2	VAT1L	122.091	-3.69489	0.708718	-5.21349	1.85323e-07	1.1782e-05
ENSG00000106066.14	CPVL	130.954	2.49765	0.479887	5.20467	1.9434e-07	1.2311e-05
ENSG00000149573.8	MPZL2	49.2545	-5.88767	1.13173	-5.20236	1.96776e-07	1.23766e-05
ENSG00000171617.13	ENC1	2242.43	1.39818	0.268725	5.203	1.96095e-07	1.23766e-05
ENSG00000107984.9	DKK1	504.843	-2.10544	0.405509	-5.19208	2.07952e-07	1.29414e-05
ENSG00000143554.13	SLC27A3	2070.96	-2.2893	0.440918	-5.19213	2.07901e-07	1.29414e-05
ENSG00000164100.8	NDST3	224.336	-2.02398	0.389778	-5.19266	2.07307e-07	1.29414e-05
ENSG00000157404.15	KIT	7176.03	-2.00153	0.38564	-5.19016	2.10113e-07	1.303e-05
ENSG00000002587.9	HS3ST1	157.351	2.58009	0.497333	5.18786	2.12722e-07	1.31456e-05
ENSG00000187720.14	THSD4	948.025	-2.16215	0.416951	-5.18562	2.15302e-07	1.32587e-05
ENSG00000162614.18	NEXN	128.356	-2.38757	0.460636	-5.18319	2.18118e-07	1.33855e-05
ENSG00000145386.9	CCNA2	1362.13	-2.00448	0.386982	-5.17979	2.22135e-07	1.35848e-05
ENSG00000110848.8	CD69	126.121	2.38613	0.461275	5.1729	2.30486e-07	1.40469e-05
ENSG00000093009.9	CDC45	429.847	-1.92805	0.372992	-5.16916	2.35149e-07	1.42819e-05
ENSG00000179242.15	CDH4	233.974	-2.99645	0.580168	-5.1648	2.407e-07	1.4569e-05
ENSG00000138685.15	FGF2	429.184	1.78387	0.345718	5.15991	2.47071e-07	1.49035e-05
ENSG00000119686.9	FLVCR2	160.075	2.19439	0.426561	5.14437	2.68425e-07	1.61365e-05
ENSG00000175426.10	PCSK1	85.6664	3.83027	0.745503	5.13783	2.77923e-07	1.66509e-05
ENSG00000017427.16	IGF1	115.812	3.31332	0.645413	5.13365	2.84181e-07	1.69683e-05
ENSG00000164104.11	HMGB2	1505.48	-1.41971	0.276631	-5.13213	2.86487e-07	1.70484e-05
ENSG00000089820.15	ARHGAP4	1360.98	-1.45511	0.283738	-5.12836	2.92273e-07	1.73343e-05
ENSG00000137309.19	HMGA1	2164.15	-1.47594	0.28795	-5.1257	2.96435e-07	1.75224e-05
ENSG00000112984.11	KIF20A	1070.16	-2.24652	0.438595	-5.12208	3.02176e-07	1.78022e-05
ENSG00000134222.16	PSRC1	230.617	-2.25052	0.439677	-5.11858	3.07846e-07	1.8076e-05
ENSG00000112837.16	TBX18	67.0323	-4.33347	0.847755	-5.1117	3.19271e-07	1.86847e-05
ENSG00000180801.13	ARSJ	1154.19	-2.11004	0.414418	-5.09156	3.55124e-07	2.07126e-05
ENSG00000239704.10	CDRT4	32.6916	5.05522	0.99298	5.09095	3.56266e-07	2.07126e-05
ENSG00000137965.10	IFI44	149.873	2.39945	0.471434	5.08967	3.58682e-07	2.07848e-05
ENSG00000167037.18	SGSM1	37.9728	-4.33383	0.85166	-5.08869	3.60552e-07	2.08248e-05
ENSG00000142910.15	TINAGL1	1142.23	-2.05613	0.404413	-5.08423	3.69115e-07	2.125e-05
ENSG00000204580.13	DDR1	57.3002	-3.75551	0.738796	-5.08329	3.70955e-07	2.12866e-05
ENSG00000132965.9	ALOX5AP	130.947	2.46824	0.48565	5.08235	3.72793e-07	2.13228e-05
ENSG00000178726.6	THBD	5589.03	-1.81072	0.356774	-5.07526	3.86973e-07	2.20624e-05
ENSG00000161800.12	RACGAP1	1004.71	-2.12283	0.4185	-5.07247	3.92692e-07	2.23165e-05
ENSG00000175183.9	CSRP2	1445.44	1.66642	0.328766	5.06871	4.00514e-07	2.26881e-05
ENSG00000167513.8	CDT1	285.532	-2.00609	0.396223	-5.06303	4.12643e-07	2.33005e-05
ENSG00000117399.13	CDC20	1178.8	-1.96816	0.38896	-5.06006	4.1913e-07	2.35175e-05
ENSG00000144476.5	ACKR3	10073.2	-1.64555	0.325204	-5.06005	4.19147e-07	2.35175e-05
ENSG00000131067.16	GGT7	262.046	-2.06502	0.408474	-5.05546	4.2935e-07	2.40137e-05
ENSG00000119403.14	PHF19	647.509	-1.57146	0.310892	-5.05467	4.31127e-07	2.4037e-05
ENSG00000113916.17	BCL6	303.437	-1.80557	0.357695	-5.04777	4.46987e-07	2.48429e-05
ENSG00000184232.8	OAF	904.992	-1.84237	0.365428	-5.04166	4.61502e-07	2.55692e-05
ENSG00000185551.14	NR2F2	371.129	2.01307	0.399744	5.03591	4.75586e-07	2.62672e-05
ENSG00000118777.11	ABCG2	967.503	2.47428	0.492455	5.02438	5.05049e-07	2.78076e-05
ENSG00000159708.17	LRRC36	444.458	2.26012	0.449893	5.02368	5.06894e-07	2.78225e-05
ENSG00000198756.11	COLGALT2	253.405	-2.83263	0.564092	-5.02157	5.12497e-07	2.8043e-05
ENSG00000121769.7	FABP3	51.5326	-3.58793	0.714705	-5.02016	5.16295e-07	2.80769e-05
ENSG00000162415.6	ZSWIM5	211.485	2.24452	0.447097	5.02021	5.16159e-07	2.80769e-05
ENSG00000163554.13	SPTA1	792.1	1.62599	0.323963	5.01906	5.19253e-07	2.81511e-05
ENSG00000204516.9	MICB	89.6186	-2.70329	0.538704	-5.01813	5.21755e-07	2.82003e-05
ENSG00000179750.15	APOBEC3B	142.347	-2.68549	0.537032	-5.00062	5.71457e-07	3.07925e-05
ENSG00000104059.4	FAM189A1	571.778	1.56684	0.313599	4.99631	5.84376e-07	3.13929e-05
ENSG00000162545.5	CAMK2N1	88.1112	3.68609	0.738313	4.99258	5.9577e-07	3.1908e-05
ENSG00000106348.17	IMPDH1	2979.01	-1.42918	0.286665	-4.98554	6.17887e-07	3.29043e-05
ENSG00000171241.8	SHCBP1	882.682	-2.35136	0.471641	-4.98548	6.18096e-07	3.29043e-05
ENSG00000128606.12	LRRC17	186.038	-2.19258	0.44031	-4.97962	6.37093e-07	3.38137e-05
ENSG00000169245.5	CXCL10	72.4848	4.09939	0.824998	4.96897	6.73099e-07	3.56178e-05
ENSG00000103034.14	NDRG4	269.393	-1.97024	0.396669	-4.96697	6.80063e-07	3.58789e-05
ENSG00000134690.10	CDCA8	812.528	-1.65533	0.333347	-4.9658	6.84201e-07	3.59898e-05
ENSG00000006282.20	SPATA20	343.647	-1.8221	0.367462	-4.95861	7.0999e-07	3.72355e-05
ENSG00000156925.11	ZIC3	92.1069	3.17955	0.641332	4.95772	7.13239e-07	3.72952e-05
ENSG00000082458.11	DLG3	57.0295	-3.36845	0.680705	-4.94847	7.47976e-07	3.89963e-05
ENSG00000161999.11	JMJD8	930.183	-1.45228	0.293668	-4.94531	7.60231e-07	3.95186e-05
ENSG00000130303.12	BST2	548.588	-2.68875	0.544165	-4.94106	7.76981e-07	4.02709e-05
ENSG00000115380.19	EFEMP1	40608.4	-2.15507	0.43632	-4.9392	7.84439e-07	4.05385e-05
ENSG00000183421.11	RIPK4	20.0724	7.76076	1.57209	4.9366	7.94972e-07	4.09631e-05
ENSG00000244486.8	SCARF2	720.392	-1.5415	0.312589	-4.93139	8.16485e-07	4.19493e-05
ENSG00000003989.17	SLC7A2	36.1087	-4.99735	1.01355	-4.93054	8.2004e-07	4.20098e-05
ENSG00000111674.8	ENO2	342.304	-2.24072	0.455027	-4.92437	8.46325e-07	4.32311e-05
ENSG00000133800.8	LYVE1	7168.38	-1.42196	0.288905	-4.92188	8.57177e-07	4.36592e-05
ENSG00000107105.14	ELAVL2	283.663	1.85043	0.376058	4.92061	8.62758e-07	4.36916e-05
ENSG00000109072.13	VTN	88.9553	-3.02866	0.615504	-4.92063	8.62677e-07	4.36916e-05
ENSG00000164327.12	RICTOR	2615.35	-1.35405	0.275355	-4.91748	8.76635e-07	4.42676e-05
ENSG00000178202.12	KDELC2	1531.39	-1.94063	0.395032	-4.91259	8.98814e-07	4.52582e-05
ENSG00000147459.17	DOCK5	97.2493	-2.85677	0.582222	-4.90667	9.26335e-07	4.65115e-05
ENSG00000134709.10	HOOK1	65.6767	3.52815	0.719458	4.9039	9.39527e-07	4.70402e-05
ENSG00000176971.3	FIBIN	28.2744	-6.96213	1.42058	-4.90092	9.53894e-07	4.76246e-05
ENSG00000071539.13	TRIP13	965.127	-1.82765	0.373088	-4.89872	9.64653e-07	4.80261e-05
ENSG00000104081.13	BMF	268.783	1.95195	0.398679	4.89603	9.77909e-07	4.85493e-05
ENSG00000153956.15	CACNA2D1	867.801	-1.6918	0.345783	-4.89267	9.94763e-07	4.91102e-05
ENSG00000204136.10	GGTA1P	145.436	-2.33846	0.477925	-4.89295	9.93381e-07	4.91102e-05
ENSG00000187210.13	GCNT1	213.291	-1.90793	0.390357	-4.88765	1.02048e-06	5.02395e-05
ENSG00000169181.12	GSG1L	23.8246	7.37734	1.51442	4.8714	1.1081e-06	5.44014e-05
ENSG00000166851.14	PLK1	1204.21	-1.74599	0.358642	-4.86834	1.12539e-06	5.50973e-05
ENSG00000165480.15	SKA3	382.964	-2.00443	0.412526	-4.85892	1.18028e-06	5.7625e-05
ENSG00000183876.8	ARSI	20.9489	-7.57415	1.56253	-4.84737	1.25108e-06	6.09137e-05
ENSG00000107438.8	PDLIM1	1552.85	-1.50372	0.311008	-4.83498	1.33161e-06	6.46562e-05
ENSG00000122971.8	ACADS	184.57	-2.2142	0.458035	-4.83413	1.33731e-06	6.47553e-05
ENSG00000155011.8	DKK2	885.439	5.26013	1.08862	4.83193	1.35218e-06	6.5296e-05
ENSG00000162390.17	ACOT11	209.58	-2.19261	0.453837	-4.83126	1.35669e-06	6.53356e-05
ENSG00000172602.10	RND1	447.467	2.26658	0.469321	4.82948	1.36892e-06	6.57454e-05
ENSG00000198901.13	PRC1	1399.46	-1.94286	0.402381	-4.8284	1.37633e-06	6.59219e-05
ENSG00000235217.6	TSPY26P	220.154	-1.93758	0.401421	-4.8268	1.38744e-06	6.62746e-05
ENSG00000143367.15	TUFT1	343.923	-1.64734	0.341786	-4.81979	1.43708e-06	6.84609e-05
ENSG00000100321.14	SYNGR1	45.1883	-4.22	0.875862	-4.81811	1.44926e-06	6.86714e-05
ENSG00000175063.16	UBE2C	772.369	-1.50824	0.313066	-4.81763	1.45275e-06	6.86714e-05
ENSG00000277117.4	FP565260.3	504.288	-1.77306	0.368041	-4.81757	1.45316e-06	6.86714e-05
ENSG00000103653.16	CSK	1528.2	1.36795	0.284161	4.81399	1.47949e-06	6.97293e-05
ENSG00000137804.12	NUSAP1	1517.41	-1.74666	0.362881	-4.81331	1.48448e-06	6.97787e-05
ENSG00000135324.5	MRAP2	152.906	-2.35991	0.491459	-4.80184	1.57212e-06	7.37022e-05
ENSG00000169607.12	CKAP2L	460.045	-1.83767	0.383008	-4.798	1.60259e-06	7.49318e-05
ENSG00000129946.10	SHC2	530.307	1.83189	0.38192	4.79654	1.61432e-06	7.5281e-05
ENSG00000221955.10	SLC12A8	27.2434	-6.62653	1.38285	-4.79193	1.65188e-06	7.683e-05
ENSG00000240990.10	HOXA11-AS	115.121	2.56857	0.536704	4.78582	1.70293e-06	7.89964e-05
ENSG00000138030.12	KHK	268.171	-1.79447	0.37582	-4.77483	1.79862e-06	8.29994e-05
ENSG00000151388.10	ADAMTS12	77.9673	-3.46654	0.725927	-4.77533	1.79413e-06	8.29994e-05
ENSG00000087077.13	TRIP6	621.537	-1.55964	0.326918	-4.77072	1.8357e-06	8.44901e-05
ENSG00000164284.14	GRPEL2	3356.32	1.29845	0.272565	4.76382	1.89959e-06	8.72037e-05
ENSG00000042832.11	TG	86.6699	2.79312	0.586588	4.76164	1.9203e-06	8.79257e-05
ENSG00000120337.8	TNFSF18	56.9142	3.50481	0.736731	4.75725	1.9625e-06	8.96259e-05
ENSG00000182985.17	CADM1	482.775	-1.58869	0.334028	-4.75617	1.973e-06	8.98734e-05
ENSG00000245532.8	NEAT1	801.738	2.27074	0.477629	4.75419	1.99239e-06	9.05233e-05
ENSG00000051180.16	RAD51	589.123	-1.689	0.355592	-4.74983	2.03584e-06	9.226e-05
ENSG00000166833.20	NAV2	103.681	2.34733	0.494444	4.74742	2.06024e-06	9.31272e-05
ENSG00000166508.17	MCM7	2745.03	-1.56542	0.330184	-4.74105	2.12611e-06	9.58592e-05
ENSG00000158321.16	AUTS2	278.686	1.97028	0.415631	4.74045	2.13242e-06	9.58993e-05
ENSG00000145247.11	OCIAD2	6990.32	1.5608	0.329486	4.73707	2.16829e-06	9.7265e-05
ENSG00000205279.8	CTXN3	18.4475	7.57709	1.60021	4.73505	2.19004e-06	9.79919e-05
ENSG00000110799.13	VWF	8927.15	1.62907	0.344428	4.72978	2.24764e-06	0.000100315
ENSG00000263873.1	AP003396.5	45.3921	-3.57004	0.755617	-4.72467	2.30493e-06	0.000102613
ENSG00000139629.15	GALNT6	117.292	-2.96163	0.62698	-4.72364	2.31658e-06	0.000102873
ENSG00000221866.9	PLXNA4	120.057	-2.55856	0.54196	-4.72094	2.34752e-06	0.000103985
ENSG00000122863.5	CHST3	123.42	-3.20271	0.679572	-4.71283	2.44294e-06	0.000107941
ENSG00000105983.20	LMBR1	5853.65	1.57012	0.333554	4.70723	2.51107e-06	0.000110604
ENSG00000228716.6	DHFR	981.422	-1.48752	0.316032	-4.70685	2.51571e-06	0.000110604
ENSG00000162692.11	VCAM1	25.7003	-7.13447	1.51723	-4.70231	2.57239e-06	0.000112815
ENSG00000214776.12	AC092821.1	271.178	1.76355	0.375112	4.7014	2.58383e-06	0.000113036
ENSG00000110328.5	GALNT18	7196.88	1.35096	0.287469	4.6995	2.60796e-06	0.00011381
ENSG00000184408.9	KCND2	455.477	-2.2585	0.480678	-4.69857	2.61994e-06	0.000114051
ENSG00000104321.10	TRPA1	80.8698	-3.82421	0.814793	-4.69347	2.68609e-06	0.000116644
ENSG00000176697.18	BDNF	131.661	-2.96397	0.632379	-4.68701	2.77228e-06	0.000120091
ENSG00000100078.3	PLA2G3	347.345	-1.77797	0.379532	-4.68465	2.80439e-06	0.000121185
ENSG00000118816.9	CCNI	5513.3	1.25803	0.268695	4.68199	2.84098e-06	0.000122467
ENSG00000176438.12	SYNE3	36.1533	-4.33066	0.925358	-4.67998	2.86897e-06	0.000123373
ENSG00000111339.11	ART4	97.0108	-3.02368	0.647107	-4.67261	2.97402e-06	0.00012758
ENSG00000149260.16	CAPN5	1007.95	-1.61936	0.347688	-4.65751	3.20055e-06	0.000136965
ENSG00000164932.12	CTHRC1	463.46	2.59126	0.556931	4.65276	3.27523e-06	0.000139822
ENSG00000183117.18	CSMD1	84.5498	3.05489	0.65667	4.6521	3.28575e-06	0.000139933
ENSG00000166888.11	STAT6	1447.35	-1.40437	0.302309	-4.6455	3.39262e-06	0.000144137
ENSG00000176956.12	LY6H	360.444	-1.58564	0.341435	-4.64404	3.41659e-06	0.000144808
ENSG00000026559.13	KCNG1	84.7051	-2.70825	0.5843	-4.63502	3.56898e-06	0.000150905
ENSG00000081052.12	COL4A4	106.297	2.61738	0.565418	4.6291	3.67264e-06	0.000154181
ENSG00000128709.12	HOXD9	78.7136	2.52105	0.544516	4.6299	3.65842e-06	0.000154181
ENSG00000168078.9	PBK	439.769	-1.90388	0.411278	-4.62917	3.67137e-06	0.000154181
ENSG00000146648.17	EGFR	42.3141	-4.12458	0.891132	-4.62848	3.68365e-06	0.000154277
ENSG00000146242.8	TPBG	2430.11	-1.32332	0.286042	-4.62631	3.7224e-06	0.000155531
ENSG00000118193.11	KIF14	223.942	-2.02393	0.437863	-4.62229	3.79533e-06	0.000157832
ENSG00000178718.6	RPP25	3225.64	1.72444	0.373053	4.62251	3.79116e-06	0.000157832
ENSG00000081059.19	TCF7	59.2952	2.85434	0.618642	4.61387	3.95235e-06	0.000163976
ENSG00000135476.11	ESPL1	449.503	-2.20176	0.47731	-4.61284	3.97195e-06	0.000164403
ENSG00000163673.7	DCLK3	181.499	-2.12066	0.461149	-4.59865	4.25238e-06	0.000175599
ENSG00000166257.8	SCN3B	5841.92	-1.25369	0.272655	-4.59809	4.26389e-06	0.000175664
ENSG00000189067.12	LITAF	78.4804	-2.67933	0.582852	-4.59693	4.28755e-06	0.000176228
ENSG00000183010.16	PYCR1	1620.56	-1.33024	0.290118	-4.58518	4.53591e-06	0.000186004
ENSG00000105245.9	NUMBL	188.154	-2.07152	0.451848	-4.58455	4.54975e-06	0.00018614
ENSG00000164543.6	STK17A	1568.98	1.31516	0.287132	4.58032	4.64272e-06	0.000189505
ENSG00000183607.9	GKN2	53.2247	3.68191	0.804193	4.57839	4.68574e-06	0.00019082
ENSG00000004799.7	PDK4	95.9477	-2.61093	0.570423	-4.57719	4.71269e-06	0.000191476
ENSG00000136997.17	MYC	1776.1	-1.32795	0.290482	-4.57153	4.84164e-06	0.000196264
ENSG00000170775.2	GPR37	1830.02	-1.58602	0.347173	-4.56839	4.91483e-06	0.000198775
ENSG00000076003.4	MCM6	1755.7	-1.51662	0.332105	-4.56669	4.95489e-06	0.000199938
ENSG00000109805.9	NCAPG	1263.1	-1.81034	0.396764	-4.56275	5.04878e-06	0.0002028
ENSG00000212643.3	ZRSR2P1	16.2502	7.50315	1.64438	4.56291	5.04496e-06	0.0002028
ENSG00000178662.15	CSRNP3	77.249	2.5852	0.566964	4.55973	5.12199e-06	0.000205275
ENSG00000167123.18	CERCAM	1278.43	-1.4382	0.315648	-4.55635	5.2051e-06	0.000208133
ENSG00000229807.11	XIST	387.543	1.53207	0.336303	4.55564	5.2226e-06	0.000208362
ENSG00000086991.12	NOX4	2840.82	1.30634	0.286826	4.55448	5.25161e-06	0.000209047
ENSG00000251442.5	LINC01094	187.452	1.92047	0.421813	4.55289	5.29136e-06	0.000210156
ENSG00000198053.11	SIRPA	1453.4	-1.37548	0.302568	-4.54603	5.46663e-06	0.000216631
ENSG00000112297.14	CRYBG1	5749.61	-2.09138	0.460338	-4.54315	5.54206e-06	0.000219128
ENSG00000280165.1	PCDH20	25.5117	-6.16243	1.3567	-4.54221	5.56682e-06	0.000219616
ENSG00000134326.11	CMPK2	826.452	-1.36538	0.300711	-4.54051	5.61173e-06	0.000220793
ENSG00000198363.17	ASPH	6775.04	-1.41921	0.312592	-4.54014	5.62163e-06	0.000220793
ENSG00000138160.5	KIF11	843.804	-1.77825	0.392092	-4.53529	5.75243e-06	0.000225429
ENSG00000110693.17	SOX6	1020.16	1.3141	0.28981	4.53436	5.77786e-06	0.000225925
ENSG00000115252.18	PDE1A	77.1005	3.29197	0.727151	4.52722	5.97658e-06	0.000232665
ENSG00000133433.10	GSTT2B	128.358	-2.29148	0.506134	-4.52742	5.9709e-06	0.000232665
ENSG00000145808.9	ADAMTS19	40.5082	5.60113	1.23796	4.5245	6.05397e-06	0.00023516
ENSG00000104332.11	SFRP1	489.933	-1.71793	0.379803	-4.52321	6.09078e-06	0.000236071
ENSG00000065357.19	DGKA	456.495	-1.4775	0.326928	-4.51932	6.20372e-06	0.000239922
ENSG00000082556.10	OPRK1	21.1779	6.91846	1.53389	4.5104	6.47049e-06	0.000249693
ENSG00000042286.14	AIFM2	133.606	-2.47227	0.548231	-4.50955	6.49666e-06	0.000250157
ENSG00000164683.16	HEY1	9360.43	-1.17502	0.260966	-4.5026	6.7128e-06	0.000257918
ENSG00000163590.13	PPM1L	552.612	1.81637	0.403493	4.50161	6.74403e-06	0.000258555
ENSG00000237649.7	KIFC1	776.416	-1.83844	0.408823	-4.49691	6.89485e-06	0.000263765
ENSG00000134057.14	CCNB1	2333.17	-1.37011	0.304884	-4.49386	6.9942e-06	0.000266988
ENSG00000108700.4	CCL8	414.055	1.86361	0.414971	4.49095	7.09078e-06	0.000270092
ENSG00000099875.14	MKNK2	2378.23	1.19524	0.266778	4.48029	7.45413e-06	0.000283116
ENSG00000165304.7	MELK	762.619	-1.55263	0.34657	-4.47999	7.46475e-06	0.000283116
ENSG00000101412.12	E2F1	549.96	-1.70975	0.381786	-4.47828	7.52453e-06	0.000284268
ENSG00000143119.13	CD53	206.215	2.43022	0.542677	4.47821	7.52731e-06	0.000284268
ENSG00000157833.12	GAREM2	207.358	-1.77511	0.396443	-4.47758	7.54934e-06	0.000284493
ENSG00000080986.12	NDC80	540.155	-1.70581	0.381032	-4.47683	7.57609e-06	0.000284649
ENSG00000167767.13	KRT80	494.978	-1.53555	0.343021	-4.47655	7.58571e-06	0.000284649
ENSG00000114948.12	ADAM23	1027.69	-1.82672	0.40821	-4.47496	7.64248e-06	0.000285819
ENSG00000138061.11	CYP1B1	1732.09	7.65402	1.71048	4.47477	7.64922e-06	0.000285819
ENSG00000232759.1	AC002480.1	67.5874	2.6942	0.604233	4.45887	8.23924e-06	0.000307216
ENSG00000178860.8	MSC	1691.88	-1.65768	0.371924	-4.45704	8.31002e-06	0.000309203
ENSG00000112299.7	VNN1	19.1072	6.67817	1.50628	4.43355	9.26925e-06	0.000344169
ENSG00000182179.12	UBA7	166.761	-2.39984	0.541416	-4.43253	9.31332e-06	0.000345081
ENSG00000178467.17	P4HTM	503.495	-1.45678	0.328897	-4.42928	9.45471e-06	0.000349587
ENSG00000276043.4	UHRF1	2433.7	-1.66756	0.376809	-4.42549	9.62253e-06	0.000355049
ENSG00000141448.8	GATA6	1351.72	-1.27573	0.288539	-4.42133	9.8093e-06	0.000361187
ENSG00000129116.18	PALLD	5411.77	-1.31689	0.297911	-4.42041	9.85123e-06	0.000361976
ENSG00000186998.15	EMID1	71.7824	-2.66858	0.603855	-4.41924	9.9047e-06	0.000363186
ENSG00000120457.11	KCNJ5	55.0027	-3.07327	0.695625	-4.418	9.96162e-06	0.000364517
ENSG00000170458.13	CD14	909.648	-1.33551	0.302631	-4.413	1.01947e-05	0.000372277
ENSG00000090889.11	KIF4A	642.744	-1.85543	0.420647	-4.41089	1.02946e-05	0.000375149
ENSG00000128394.16	APOBEC3F	49.2765	-3.11382	0.707593	-4.40058	1.07963e-05	0.000391815
ENSG00000176678.5	FOXL1	40.2193	-3.77514	0.857865	-4.40062	1.0794e-05	0.000391815
ENSG00000050628.20	PTGER3	110.278	-8.73195	1.98702	-4.3945	1.11029e-05	0.000402117
ENSG00000070193.4	FGF10	33.9656	-4.63218	1.0543	-4.3936	1.11487e-05	0.000402948
ENSG00000108798.8	ABI3	204.234	-1.75843	0.400418	-4.3915	1.12572e-05	0.000405036
ENSG00000114779.19	ABHD14B	250.226	-1.69204	0.385343	-4.391	1.12831e-05	0.000405036
ENSG00000126787.12	DLGAP5	991.083	-1.80468	0.411065	-4.39027	1.1321e-05	0.000405036
ENSG00000196549.10	MME	591.086	-4.79507	1.09191	-4.39147	1.12588e-05	0.000405036
ENSG00000275450.1	AL845472.1	256.522	1.91358	0.435858	4.39038	1.13154e-05	0.000405036
ENSG00000205978.5	NYNRIN	764.2	-2.20425	0.502197	-4.38921	1.13761e-05	0.000406185
ENSG00000178445.9	GLDC	305.636	-1.57655	0.359245	-4.38851	1.14131e-05	0.000406684
ENSG00000187688.14	TRPV2	868.491	-2.18579	0.498761	-4.38244	1.17355e-05	0.000417332
ENSG00000125398.6	SOX9	40.7018	-5.60942	1.28041	-4.38096	1.18159e-05	0.000419344
ENSG00000168542.14	COL3A1	17524.5	1.94859	0.445399	4.37492	1.21475e-05	0.000430249
ENSG00000107566.13	ERLIN1	2971.07	-1.4378	0.328788	-4.37304	1.22529e-05	0.000433115
ENSG00000042493.15	CAPG	189.187	-2.54869	0.584021	-4.36404	1.27685e-05	0.000450439
ENSG00000160957.12	RECQL4	354.427	-1.77822	0.407558	-4.36312	1.28223e-05	0.000451437
ENSG00000160703.15	NLRX1	665.916	-1.32518	0.303787	-4.3622	1.28761e-05	0.000452033
ENSG00000170312.15	CDK1	1603.55	-1.51367	0.347016	-4.36196	1.28904e-05	0.000452033
ENSG00000130176.7	CNN1	46.2475	-3.81849	0.87564	-4.36079	1.29592e-05	0.000453546
ENSG00000068383.18	INPP5A	969.869	1.68721	0.387381	4.35545	1.32796e-05	0.000463843
ENSG00000206073.10	SERPINB4	68.2523	2.91654	0.670035	4.35282	1.34399e-05	0.000468515
ENSG00000178343.4	SHISA3	49.9094	-3.80707	0.875668	-4.34762	1.37622e-05	0.000478805
ENSG00000155324.9	GRAMD2B	739.456	1.29931	0.299602	4.33679	1.44579e-05	0.00050202
ENSG00000172399.5	MYOZ2	285.537	-1.91045	0.440586	-4.33617	1.4499e-05	0.00050246
ENSG00000092853.13	CLSPN	353.928	-1.55356	0.358379	-4.33498	1.45771e-05	0.00050418
ENSG00000138650.8	PCDH10	21826.8	-1.51842	0.350322	-4.33435	1.4619e-05	0.00050464
ENSG00000227507.2	LTB	429.729	2.41817	0.558305	4.33128	1.48247e-05	0.000510745
ENSG00000108960.8	MMD	1973.54	1.28965	0.298068	4.32671	1.51356e-05	0.00052044
ENSG00000112936.18	C7	2158	-1.89863	0.439054	-4.32437	1.52971e-05	0.000524973
ENSG00000184226.14	PCDH9	1479.13	-1.39822	0.323452	-4.32279	1.54066e-05	0.000527707
ENSG00000137310.11	TCF19	595.06	-1.69137	0.391344	-4.32195	1.54656e-05	0.000528702
ENSG00000239521.8	CASTOR3	639.326	1.30328	0.302407	4.3097	1.63477e-05	0.000557778
ENSG00000171320.14	ESCO2	333.032	-2.23661	0.519768	-4.3031	1.68423e-05	0.000573545
ENSG00000127564.16	PKMYT1	301.37	-1.84839	0.430019	-4.2984	1.72033e-05	0.000584712
ENSG00000159433.11	STARD9	276.288	1.60378	0.373647	4.29222	1.76894e-05	0.000600081
ENSG00000104738.17	MCM4	2448.14	-1.76057	0.410277	-4.29116	1.77739e-05	0.000600643
ENSG00000132510.10	KDM6B	289.183	1.75179	0.408207	4.29143	1.77524e-05	0.000600643
ENSG00000075218.18	GTSE1	478.229	-1.79003	0.417643	-4.28604	1.81889e-05	0.000613494
ENSG00000148655.14	LRMDA	426.215	1.73512	0.404971	4.28456	1.83103e-05	0.000616412
ENSG00000088325.15	TPX2	2199.35	-1.48663	0.347043	-4.28371	1.83799e-05	0.000617577
ENSG00000176978.13	DPP7	1389.43	-1.29925	0.303969	-4.2743	1.91737e-05	0.000643027
ENSG00000139263.11	LRIG3	5600.88	-1.78331	0.417647	-4.26989	1.95565e-05	0.000654624
ENSG00000156049.6	GNA14	3867.92	-1.29084	0.302372	-4.26906	1.96296e-05	0.00065583
ENSG00000115896.15	PLCL1	1822.27	-1.26095	0.295417	-4.26838	1.96901e-05	0.00065661
ENSG00000113368.11	LMNB1	808.3	-1.49831	0.351404	-4.26379	2.00993e-05	0.000668992
ENSG00000131153.8	GINS2	611.47	-1.41702	0.332493	-4.2618	2.02788e-05	0.000673698
ENSG00000144730.17	IL17RD	571.765	1.59203	0.373789	4.25916	2.052e-05	0.000679894
ENSG00000179855.6	GIPC3	246.858	-1.5929	0.374015	-4.25891	2.05422e-05	0.000679894
ENSG00000120162.9	MOB3B	43.9704	3.21058	0.754052	4.25777	2.0648e-05	0.000682117
ENSG00000068831.18	RASGRP2	406.824	-1.43161	0.337236	-4.24514	2.18461e-05	0.000720349
ENSG00000073350.13	LLGL2	733.702	-1.4582	0.343551	-4.24448	2.19097e-05	0.000721103
ENSG00000101057.15	MYBL2	2297.47	-1.67326	0.394426	-4.24227	2.21273e-05	0.000726911
ENSG00000140479.16	PCSK6	856.812	-2.09449	0.493931	-4.24044	2.23082e-05	0.000730482
ENSG00000145284.11	SCD5	1092.1	-1.27345	0.300318	-4.24033	2.23187e-05	0.000730482
ENSG00000221829.9	FANCG	514.395	-1.37409	0.324163	-4.23888	2.2464e-05	0.000733879
ENSG00000137393.9	RNF144B	2834.35	-1.17542	0.27741	-4.23714	2.26383e-05	0.000737773
ENSG00000153064.11	BANK1	38.2698	3.23904	0.764491	4.23686	2.26667e-05	0.000737773
ENSG00000120437.8	ACAT2	5915.34	-1.15702	0.273114	-4.23639	2.27141e-05	0.000737957
ENSG00000227825.4	SLC9A7P1	100.549	-2.22552	0.5261	-4.23023	2.33453e-05	0.000757074
ENSG00000159674.11	SPON2	772.129	-9.28812	2.19666	-4.22828	2.35482e-05	0.000762255
ENSG00000135312.6	HTR1B	55.5121	-3.44993	0.816923	-4.22308	2.40989e-05	0.000778653
ENSG00000099139.13	PCSK5	2854.94	-1.18726	0.281169	-4.22257	2.41532e-05	0.000778986
ENSG00000091972.18	CD200	439.403	1.96009	0.464351	4.22113	2.43076e-05	0.000782535
ENSG00000170412.16	GPRC5C	76.891	-2.52762	0.599028	-4.21954	2.44806e-05	0.000786672
ENSG00000115085.13	ZAP70	60.3262	2.7519	0.652482	4.21759	2.46926e-05	0.000792044
ENSG00000143476.17	DTL	684.793	-1.82016	0.431631	-4.21694	2.47643e-05	0.000792906
ENSG00000167601.11	AXL	124.362	-3.14107	0.745394	-4.21398	2.50911e-05	0.000801916
ENSG00000143995.19	MEIS1	1031.87	-1.38395	0.32861	-4.21153	2.53644e-05	0.00080919
ENSG00000165244.6	ZNF367	178.855	-2.41221	0.573445	-4.20652	2.59328e-05	0.000825831
ENSG00000152953.12	STK32B	260.454	2.00565	0.477017	4.20457	2.61577e-05	0.000831494
ENSG00000284634.1	AC092821.3	151.514	1.86294	0.443173	4.20364	2.62655e-05	0.000833422
ENSG00000156466.9	GDF6	114.14	-9.69102	2.30596	-4.20259	2.63878e-05	0.000835804
ENSG00000106069.22	CHN2	81.7775	2.98176	0.710266	4.19809	2.6918e-05	0.000848633
ENSG00000171105.13	INSR	2746.17	1.30376	0.31055	4.19823	2.69004e-05	0.000848633
ENSG00000254726.2	MEX3A	336.078	1.55632	0.370735	4.19793	2.69369e-05	0.000848633
ENSG00000165194.15	PCDH19	522.148	1.35428	0.322683	4.19693	2.70562e-05	0.000850874
ENSG00000131747.14	TOP2A	2921.44	-1.81441	0.432688	-4.19335	2.7487e-05	0.000862888
ENSG00000100479.12	POLE2	156.631	-2.07788	0.496255	-4.18713	2.82509e-05	0.000885296
ENSG00000094804.10	CDC6	1019.02	-1.44223	0.34452	-4.1862	2.83664e-05	0.000886256
ENSG00000188778.5	ADRB3	43.5218	-3.06331	0.731785	-4.18608	2.83819e-05	0.000886256
ENSG00000163050.16	COQ8A	213.458	-1.61262	0.385669	-4.18135	2.89781e-05	0.000903278
ENSG00000104435.13	STMN2	51.4617	-4.06152	0.971769	-4.17951	2.92135e-05	0.000907414
ENSG00000139970.16	RTN1	197.703	-1.99924	0.478327	-4.17964	2.91974e-05	0.000907414
ENSG00000086289.11	EPDR1	1033.84	-1.35166	0.324043	-4.17123	3.02954e-05	0.000939284
ENSG00000095637.22	SORBS1	526.465	-1.70017	0.407674	-4.17041	3.04051e-05	0.000939284
ENSG00000150625.16	GPM6A	37.1645	4.17926	1.00215	4.17031	3.04186e-05	0.000939284
ENSG00000169413.2	RNASE6	701.208	1.30333	0.312545	4.17006	3.04521e-05	0.000939284
ENSG00000010292.12	NCAPD2	2225.36	-1.4332	0.343778	-4.16898	3.0597e-05	0.000941602
ENSG00000124019.9	FAM124B	9895.72	1.11406	0.267243	4.1687	3.06338e-05	0.000941602
ENSG00000117318.8	ID3	4394.13	1.24598	0.299396	4.16165	3.15957e-05	0.000964202
ENSG00000136842.13	TMOD1	678.23	-1.52301	0.365907	-4.16228	3.15092e-05	0.000964202
ENSG00000140525.17	FANCI	1416.99	-1.47501	0.354361	-4.16244	3.14863e-05	0.000964202
ENSG00000145428.14	RNF175	16.2492	6.50011	1.56203	4.16132	3.16418e-05	0.000964202
ENSG00000152932.7	RAB3C	115.277	2.26699	0.544693	4.16196	3.15521e-05	0.000964202
ENSG00000104763.18	ASAH1	8967.92	1.207	0.290153	4.15988	3.1842e-05	0.000967148
ENSG00000113645.14	WWC1	74.2111	-2.52402	0.606759	-4.15983	3.18479e-05	0.000967148
ENSG00000139508.14	SLC46A3	1597.65	-1.29049	0.310293	-4.15895	3.19718e-05	0.000969244
ENSG00000117595.11	IRF6	2142.59	-1.1963	0.28777	-4.15715	3.22238e-05	0.000975212
ENSG00000151725.11	CENPU	498.267	-1.63547	0.39401	-4.15083	3.31265e-05	0.00100082
ENSG00000152208.12	GRID2	13.9131	7.09215	1.70931	4.14914	3.33726e-05	0.00100653
ENSG00000198691.12	ABCA4	449.424	1.38489	0.333865	4.14804	3.35329e-05	0.00100964
ENSG00000079308.18	TNS1	398.383	-1.63489	0.394187	-4.14749	3.36147e-05	0.00101039
ENSG00000102359.6	SRPX2	6013.65	1.11686	0.269504	4.14414	3.41087e-05	0.00102349
ENSG00000221869.4	CEBPD	61.1436	-2.59753	0.627155	-4.14177	3.44642e-05	0.00103241
ENSG00000141401.11	IMPA2	62.1646	-2.48177	0.599644	-4.13874	3.49225e-05	0.00104433
ENSG00000170004.16	CHD3	1526.19	1.15173	0.278307	4.13835	3.49805e-05	0.00104433
ENSG00000124766.6	SOX4	5702.59	1.09139	0.264139	4.13188	3.59811e-05	0.00107239
ENSG00000105173.13	CCNE1	209.269	-1.93085	0.467704	-4.12836	3.65357e-05	0.00108709
ENSG00000175938.6	ORAI3	1403.27	-1.1429	0.277113	-4.12432	3.71834e-05	0.0011045
ENSG00000130300.8	PLVAP	8813.61	-1.2874	0.312289	-4.12246	3.74849e-05	0.00111159
ENSG00000133030.20	MPRIP	2328.42	1.36141	0.330366	4.12092	3.77366e-05	0.00111718
ENSG00000241489.7	AC244197.3	302.279	-1.5597	0.37863	-4.11932	3.79993e-05	0.00112308
ENSG00000112276.13	BVES	651.822	-1.23943	0.301092	-4.11644	3.84769e-05	0.00113529
ENSG00000119938.8	PPP1R3C	44.9137	-3.84648	0.934687	-4.11526	3.8674e-05	0.00113622
ENSG00000143228.12	NUF2	242.577	-1.93083	0.469145	-4.11563	3.86129e-05	0.00113622
ENSG00000165029.15	ABCA1	962.118	1.57644	0.383087	4.1151	3.87013e-05	0.00113622
ENSG00000168003.16	SLC3A2	8890.67	1.07687	0.261994	4.11028	3.95186e-05	0.00115829
ENSG00000166147.13	FBN1	5224.34	-1.75238	0.426429	-4.10944	3.96625e-05	0.00116059
ENSG00000138496.16	PARP9	261.74	-1.76832	0.430416	-4.1084	3.98416e-05	0.0011639
ENSG00000110042.7	DTX4	463.717	1.40755	0.342808	4.10596	4.02639e-05	0.0011743
ENSG00000048052.21	HDAC9	1015.65	1.30472	0.317967	4.10332	4.07266e-05	0.00118583
ENSG00000164713.9	BRI3	1863.57	1.53135	0.373868	4.09596	4.20417e-05	0.00122211
ENSG00000137135.17	ARHGEF39	86.0324	-2.16568	0.528946	-4.09434	4.2338e-05	0.00122871
ENSG00000164116.16	GUCY1A1	79.2876	2.82283	0.68988	4.09177	4.28099e-05	0.00124037
ENSG00000104213.12	PDGFRL	118.401	-1.91334	0.467707	-4.09089	4.29718e-05	0.00124302
ENSG00000237149.5	ZNF503-AS2	155.35	1.7659	0.431749	4.0901	4.31185e-05	0.00124522
ENSG00000198888.2	MT-ND1	6443.43	1.15634	0.282874	4.08782	4.3544e-05	0.00125546
ENSG00000168032.9	ENTPD3	22.6946	-5.59167	1.3708	-4.07913	4.52039e-05	0.00130119
ENSG00000016082.14	ISL1	50.2031	3.15683	0.774153	4.07778	4.54671e-05	0.00130664
ENSG00000197496.5	SLC2A10	1244.98	-1.38876	0.340653	-4.07674	4.56716e-05	0.00131039
ENSG00000038295.7	TLL1	78.5097	3.07203	0.75469	4.07059	4.68943e-05	0.00134329
ENSG00000126950.7	TMEM35A	280.582	-1.62245	0.39866	-4.06977	4.7059e-05	0.00134583
ENSG00000090776.5	EFNB1	693.885	1.71077	0.420577	4.06768	4.7483e-05	0.00135576
ENSG00000135473.14	PAN2	292.952	-1.43438	0.352701	-4.06684	4.76548e-05	0.00135847
ENSG00000119547.5	ONECUT2	21.2764	5.6956	1.40177	4.06315	4.8415e-05	0.00137792
ENSG00000075340.22	ADD2	43.1606	-3.747	0.923407	-4.0578	4.95367e-05	0.00140758
ENSG00000087303.17	NID2	5115.19	1.28088	0.31573	4.0569	4.97289e-05	0.00141077
ENSG00000091592.15	NLRP1	1065.73	-1.2046	0.297648	-4.04707	5.18627e-05	0.00146894
ENSG00000147251.15	DOCK11	67.6089	-2.62078	0.647697	-4.04631	5.2032e-05	0.00147138
ENSG00000072571.19	HMMR	539.882	-1.69781	0.419721	-4.04509	5.23028e-05	0.00147619
ENSG00000196405.12	EVL	793.9	1.24729	0.308369	4.04479	5.23691e-05	0.00147619
ENSG00000184374.2	COLEC10	65.6538	2.69146	0.665854	4.04212	5.29708e-05	0.00149077
ENSG00000092470.11	WDR76	280.46	-2.15148	0.532447	-4.04074	5.32834e-05	0.00149719
ENSG00000121281.12	ADCY7	168.22	-1.97886	0.490005	-4.03845	5.38058e-05	0.00150947
ENSG00000108479.11	GALK1	931.096	-1.52159	0.376839	-4.03777	5.39614e-05	0.00151143
ENSG00000154529.14	CNTNAP3B	1041.04	1.24332	0.308004	4.03671	5.42071e-05	0.00151352
ENSG00000163513.17	TGFBR2	39523.6	-1.27694	0.316331	-4.03672	5.42032e-05	0.00151352
ENSG00000100276.9	RASL10A	178.26	-1.88029	0.466363	-4.03182	5.53455e-05	0.00154044
ENSG00000178814.16	OPLAH	44.8078	-3.44475	0.854327	-4.03213	5.52746e-05	0.00154044
ENSG00000137959.15	IFI44L	22.981	5.31849	1.32278	4.02071	5.8024e-05	0.00161245
ENSG00000056972.18	TRAF3IP2	814.269	1.32541	0.329808	4.01874	5.85104e-05	0.00162341
ENSG00000081803.15	CADPS2	139.169	-2.58131	0.642813	-4.01564	5.9285e-05	0.00164233
ENSG00000146670.9	CDCA5	637.392	-1.32806	0.330823	-4.01442	5.95927e-05	0.00164826
ENSG00000261832.6	AC138894.1	100.304	2.29231	0.571316	4.01233	6.0123e-05	0.00166033
ENSG00000103257.8	SLC7A5	705.633	-1.80818	0.450892	-4.01022	6.06625e-05	0.0016723
ENSG00000105011.8	ASF1B	577.846	-1.63241	0.407095	-4.0099	6.07454e-05	0.0016723
ENSG00000068489.12	PRR11	227.096	-1.66726	0.415904	-4.00876	6.10373e-05	0.00167511
ENSG00000267060.5	PTGES3L	79.66	-2.17065	0.541437	-4.00905	6.09642e-05	0.00167511
ENSG00000213853.9	EMP2	136.333	-2.00045	0.499325	-4.00631	6.16736e-05	0.00168995
ENSG00000166450.12	PRTG	452.849	1.67626	0.419161	3.99907	6.35906e-05	0.00173978
ENSG00000156711.16	MAPK13	245.154	-1.84471	0.461413	-3.99796	6.38919e-05	0.00174533
ENSG00000225889.7	AC012368.1	35.7225	3.1948	0.799485	3.99607	6.44029e-05	0.00175386
ENSG00000270885.1	RASL10B	125.971	2.71787	0.680118	3.99617	6.43756e-05	0.00175386
ENSG00000075651.15	PLD1	3990.01	-1.25434	0.313972	-3.99506	6.4679e-05	0.00175867
ENSG00000139329.4	LUM	760.282	-1.43611	0.359789	-3.99154	6.56456e-05	0.00178221
ENSG00000138315.12	OIT3	19.9477	-5.44684	1.36768	-3.98255	6.818e-05	0.00184818
ENSG00000005243.9	COPZ2	81.8119	-2.38068	0.598191	-3.9798	6.89746e-05	0.00186
ENSG00000124772.11	CPNE5	294.229	1.39316	0.350077	3.97958	6.90371e-05	0.00186
ENSG00000171345.13	KRT19	340.881	-9.64308	2.42284	-3.98008	6.88924e-05	0.00186
ENSG00000261269.1	AC093278.2	335.054	1.38899	0.348982	3.98012	6.8881e-05	0.00186
ENSG00000183747.11	ACSM2A	69.2218	2.40426	0.604541	3.977	6.979e-05	0.00187743
ENSG00000186187.11	ZNRF1	2652.8	1.07092	0.26935	3.97593	7.01035e-05	0.00188299
ENSG00000185008.17	ROBO2	22.5134	5.37755	1.35347	3.97314	7.09304e-05	0.00190231
ENSG00000006638.11	TBXA2R	705.554	-1.514	0.381145	-3.97224	7.11996e-05	0.00190664
ENSG00000112541.14	PDE10A	70.3009	2.73908	0.689905	3.97024	7.18014e-05	0.00191985
ENSG00000182287.14	AP1S2	12991.2	1.0299	0.259454	3.9695	7.20242e-05	0.00192289
ENSG00000111206.12	FOXM1	1061.77	-1.67063	0.421037	-3.96789	7.2513e-05	0.00192849
ENSG00000162063.12	CCNF	1665	-1.40898	0.355111	-3.96773	7.25612e-05	0.00192849
ENSG00000177144.7	NUDT4B	3685.72	-1.27032	0.320133	-3.96812	7.24432e-05	0.00192849
ENSG00000187871.2	GFRAL	148.899	2.1672	0.546343	3.96674	7.28627e-05	0.0019336
ENSG00000175643.9	RMI2	267.089	-1.49241	0.377002	-3.95864	7.53777e-05	0.00199734
ENSG00000169174.10	PCSK9	25.0481	-5.00084	1.26417	-3.95583	7.62702e-05	0.00201796
ENSG00000179604.9	CDC42EP4	329.495	-1.65263	0.417856	-3.95503	7.65236e-05	0.00202164
ENSG00000184304.14	PRKD1	415.953	-1.59957	0.404621	-3.95325	7.70961e-05	0.00203373
ENSG00000197122.11	SRC	359.48	-1.39059	0.35204	-3.9501	7.81182e-05	0.00205762
ENSG00000186918.13	ZNF395	201.064	-1.52955	0.387256	-3.94972	7.82424e-05	0.00205782
ENSG00000156802.12	ATAD2	1065.72	-1.47994	0.37473	-3.94936	7.83594e-05	0.00205784
ENSG00000126562.16	WNK4	24.5915	-5.02129	1.27239	-3.94633	7.93589e-05	0.00208099
ENSG00000184661.13	CDCA2	328.371	-1.99811	0.506623	-3.94397	8.01444e-05	0.00209848
ENSG00000137807.15	KIF23	647.723	-1.44823	0.367257	-3.94337	8.03457e-05	0.00210064
ENSG00000162804.13	SNED1	111.828	-2.33956	0.59356	-3.94157	8.09509e-05	0.00211333
ENSG00000005471.17	ABCB4	48.1033	3.71563	0.943044	3.94004	8.14666e-05	0.00212366
ENSG00000164403.14	SHROOM1	600.664	1.20937	0.307079	3.9383	8.20626e-05	0.00213605
ENSG00000114251.14	WNT5A	2205.71	-1.20085	0.305211	-3.93449	8.33719e-05	0.00216693
ENSG00000170160.17	CCDC144A	82.7587	2.41127	0.612935	3.93397	8.35554e-05	0.00216852
ENSG00000196946.10	ZNF705A	21.4076	4.87511	1.24017	3.931	8.45945e-05	0.00219226
ENSG00000092929.11	UNC13D	57.9939	-2.51181	0.639362	-3.92861	8.54368e-05	0.00220317
ENSG00000137672.12	TRPC6	11.6008	7.02507	1.78801	3.92899	8.53026e-05	0.00220317
ENSG00000148773.13	MKI67	998.712	-1.46975	0.374135	-3.9284	8.55142e-05	0.00220317
ENSG00000197343.10	ZNF655	124.564	-1.84279	0.46902	-3.92902	8.5292e-05	0.00220317
ENSG00000162407.8	PLPP3	419.836	-1.3465	0.342847	-3.92741	8.58672e-05	0.00220905
ENSG00000134250.19	NOTCH2	234.12	-1.4998	0.381989	-3.9263	8.62637e-05	0.00221602
ENSG00000157193.16	LRP8	988.307	-1.60065	0.408037	-3.9228	8.75266e-05	0.0022452
ENSG00000187741.14	FANCA	400.91	-1.84507	0.470392	-3.92242	8.76639e-05	0.00224547
ENSG00000166881.9	NEMP1	564.092	-1.42799	0.364406	-3.91869	8.90325e-05	0.00227601
ENSG00000176692.6	FOXC2	259.458	-1.74868	0.446266	-3.91847	8.91138e-05	0.00227601
ENSG00000153253.16	SCN3A	276.967	10.7397	2.74112	3.91798	8.92925e-05	0.00227728
ENSG00000196954.13	CASP4	237.525	1.56669	0.400025	3.91647	8.98552e-05	0.00228833
ENSG00000139182.14	CLSTN3	2995.66	-1.55789	0.39784	-3.91586	9.00813e-05	0.00229079
ENSG00000146966.12	DENND2A	593.202	-1.36446	0.348709	-3.9129	9.11939e-05	0.00231575
ENSG00000117586.10	TNFSF4	92.543	-2.48589	0.636376	-3.90632	9.37141e-05	0.00237633
ENSG00000127533.3	F2RL3	880.027	-1.62436	0.416383	-3.90112	9.57493e-05	0.00242398
ENSG00000166664.13	CHRFAM7A	168.422	1.67454	0.429278	3.90082	9.58674e-05	0.00242398
ENSG00000163975.11	MELTF	23.1378	-3.98668	1.0223	-3.89972	9.63036e-05	0.00243153
ENSG00000158373.8	HIST1H2BD	89.5461	2.1837	0.560143	3.89846	9.68056e-05	0.00244072
ENSG00000160712.12	IL6R	170.03	-1.94898	0.500014	-3.89784	9.70543e-05	0.0024435
ENSG00000162543.5	UBXN10	43.2005	2.75976	0.708225	3.89673	9.74999e-05	0.00245123
ENSG00000197415.11	VEPH1	2452.14	-1.06885	0.27462	-3.89212	9.93735e-05	0.00249478
ENSG00000168264.10	IRF2BP2	1183.72	1.13658	0.292064	3.89156	9.96009e-05	0.00249695
ENSG00000088305.18	DNMT3B	213.258	-1.67354	0.430173	-3.89039	0.000100085	0.00250553
ENSG00000125458.6	NT5C	207.17	-1.79421	0.461273	-3.88969	0.000100374	0.00250921
ENSG00000013588.8	GPRC5A	133.676	-8.80232	2.26358	-3.88867	0.000100793	0.00251258
ENSG00000184371.13	CSF1	431.76	1.45462	0.37406	3.88874	0.000100767	0.00251258
ENSG00000166347.18	CYB5A	3180.59	1.27607	0.328211	3.88796	0.000101092	0.00251649
ENSG00000100242.15	SUN2	4382.6	-1.2367	0.318359	-3.88461	0.000102496	0.00254784
ENSG00000008283.15	CYB561	3145.85	1.04241	0.268519	3.88208	0.000103566	0.00257081
ENSG00000163053.10	SLC16A14	150.282	2.47504	0.637652	3.88149	0.000103816	0.00257342
ENSG00000169679.14	BUB1	720.659	-1.51962	0.391544	-3.88108	0.000103994	0.00257421
ENSG00000101003.9	GINS1	427.439	-1.36683	0.352255	-3.88023	0.000104356	0.00257956
ENSG00000112559.13	MDFI	102.743	-2.40173	0.619763	-3.87525	0.000106517	0.00262931
ENSG00000142871.16	CYR61	24194.4	-1.30803	0.337595	-3.87457	0.000106814	0.00263295
ENSG00000123572.16	NRK	183.137	-2.22689	0.574854	-3.87384	0.000107133	0.00263347
ENSG00000184497.12	TMEM255B	5524.77	1.12479	0.290332	3.87416	0.000106993	0.00263347
ENSG00000101955.14	SRPX	2104.95	-1.0808	0.279081	-3.8727	0.000107638	0.00264222
ENSG00000261801.5	LOXL1-AS1	62.166	-2.63691	0.682039	-3.86621	0.000110538	0.00270964
ENSG00000168389.17	MFSD2A	38.9321	-3.20159	0.828239	-3.86554	0.000110846	0.00271342
ENSG00000258430.1	AL583722.2	114.898	1.9384	0.501584	3.86456	0.000111292	0.00272057
ENSG00000121753.12	ADGRB2	12.1734	-6.83344	1.76941	-3.86199	0.000112469	0.00274555
ENSG00000065328.16	MCM10	713.032	-1.64303	0.425552	-3.86095	0.000112946	0.00275339
ENSG00000167733.13	HSD11B1L	486.707	1.25679	0.325575	3.86022	0.000113283	0.0027578
ENSG00000178053.17	MLF1	3585.92	1.26175	0.327021	3.85832	0.000114169	0.00277554
ENSG00000121904.17	CSMD2	37.3613	-3.3854	0.877642	-3.85738	0.000114609	0.00278241
ENSG00000070526.14	ST6GALNAC1	1127.06	-1.16608	0.302522	-3.85454	0.000115945	0.002811
ENSG00000163932.13	PRKCD	156.051	-2.49121	0.646627	-3.85262	0.000116861	0.00282933
ENSG00000157456.7	CCNB2	812.731	-1.48604	0.385914	-3.8507	0.000117782	0.00284771
ENSG00000137825.10	ITPKA	42.9796	3.00883	0.781665	3.84926	0.000118477	0.00286062
ENSG00000001461.16	NIPAL3	635.356	-1.36608	0.354977	-3.84837	0.000118904	0.002867
ENSG00000067057.16	PFKP	3684.73	-1.01988	0.265251	-3.84495	0.000120575	0.00290334
ENSG00000187260.15	WDR86	424.54	1.42199	0.369989	3.84333	0.000121378	0.0029187
ENSG00000073849.14	ST6GAL1	2654.85	-1.23996	0.322688	-3.8426	0.000121737	0.00291938
ENSG00000141668.9	CBLN2	14.7035	-6.33848	1.64941	-3.84287	0.000121602	0.00291938
ENSG00000130558.19	OLFM1	49.0483	-2.62263	0.682819	-3.84089	0.00012259	0.00293585
ENSG00000024526.16	DEPDC1	444.509	-2.04748	0.533368	-3.83877	0.00012365	0.00295722
ENSG00000215183.4	MSMP	799.129	1.17251	0.305471	3.83837	0.000123854	0.0029581
ENSG00000158747.14	NBL1	932.85	-1.12411	0.29319	-3.83406	0.000126048	0.00300643
ENSG00000170271.10	FAXDC2	281.716	-1.39294	0.363393	-3.83315	0.000126511	0.00301191
ENSG00000196187.11	TMEM63A	467.87	-1.21726	0.317577	-3.83295	0.000126618	0.00301191
ENSG00000099998.17	GGT5	98.7788	2.32762	0.607935	3.82874	0.0001288	0.00305519
ENSG00000100629.16	CEP128	182.143	-1.8672	0.487661	-3.8289	0.000128718	0.00305519
ENSG00000135124.14	P2RX4	1308.12	-1.40136	0.366039	-3.82844	0.000128956	0.00305519
ENSG00000187678.9	SPRY4	2110.72	1.02963	0.26911	3.82605	0.000130218	0.00308094
ENSG00000162654.8	GBP4	4820.14	-1.15178	0.301201	-3.82396	0.000131324	0.00310297
ENSG00000152253.8	SPC25	268.471	-1.41609	0.370447	-3.82266	0.000132019	0.00311522
ENSG00000138180.15	CEP55	620.979	-1.66204	0.435349	-3.81773	0.000134687	0.00316971
ENSG00000140682.18	TGFB1I1	2922.42	-1.00905	0.264305	-3.81774	0.000134679	0.00316971
ENSG00000170439.6	METTL7B	18.9643	-4.85304	1.27169	-3.8162	0.000135524	0.00318517
ENSG00000154122.13	ANKH	565.689	1.25	0.327858	3.81262	0.000137502	0.00322736
ENSG00000164035.9	EMCN	1706.36	1.34468	0.352856	3.81084	0.000138496	0.00324639
ENSG00000120913.23	PDLIM2	512.408	-1.29319	0.340042	-3.80302	0.000142944	0.0033462
ENSG00000135480.15	KRT7	23.6271	-5.00518	1.3164	-3.80218	0.00014343	0.00335026
ENSG00000148357.16	HMCN2	22.4024	-4.54734	1.19602	-3.80206	0.000143496	0.00335026
ENSG00000149131.15	SERPING1	255.883	-2.34623	0.617415	-3.80009	0.000144643	0.00337259
ENSG00000056998.19	GYG2	580.516	-1.16878	0.308115	-3.79331	0.00014865	0.00346018
ENSG00000142945.12	KIF2C	802	-1.32428	0.34913	-3.79308	0.000148791	0.00346018
ENSG00000186638.16	KIF24	107.536	-2.57676	0.67969	-3.79108	0.000149991	0.00348351
ENSG00000230438.6	SERPINB9P1	77.6463	2.1735	0.57356	3.7895	0.000150954	0.00350126
ENSG00000169071.14	ROR2	73.4394	3.17207	0.837711	3.78659	0.000152727	0.00353604
ENSG00000184227.7	ACOT1	105.565	-1.81633	0.479699	-3.78639	0.000152853	0.00353604
ENSG00000047365.11	ARAP2	73.3779	-2.92703	0.773161	-3.7858	0.000153218	0.00353983
ENSG00000246859.2	STARD4-AS1	77.3013	2.2876	0.60486	3.78203	0.000155552	0.00358906
ENSG00000163638.13	ADAMTS9	6221.63	-0.987513	0.261207	-3.78058	0.000156466	0.00360544
ENSG00000175879.8	HOXD8	199.12	1.54795	0.409529	3.77983	0.000156935	0.00361154
ENSG00000154310.16	TNIK	843.035	-1.21612	0.32187	-3.77831	0.000157899	0.00362429
ENSG00000164109.13	MAD2L1	824.382	-1.28108	0.339044	-3.77852	0.000157762	0.00362429
ENSG00000122824.10	NUDT10	634.32	1.15511	0.30605	3.77424	0.000160494	0.00367431
ENSG00000188554.13	NBR1	3186.04	-1.1939	0.316303	-3.77453	0.000160307	0.00367431
ENSG00000111331.12	OAS3	789.089	-1.33863	0.354852	-3.77236	0.000161713	0.00369742
ENSG00000120820.12	GLT8D2	80.7768	-2.06272	0.547101	-3.77028	0.000163062	0.00372346
ENSG00000167693.16	NXN	1241.95	1.21106	0.321268	3.76961	0.000163502	0.00372868
ENSG00000144554.10	FANCD2	273.67	-1.94166	0.515443	-3.76697	0.000165239	0.00376344
ENSG00000130513.6	GDF15	7755.04	1.26526	0.335943	3.7663	0.000165683	0.00376871
ENSG00000114270.17	COL7A1	23.3109	4.71786	1.25287	3.76565	0.000166114	0.0037727
ENSG00000138031.14	ADCY3	234.797	-1.66918	0.443294	-3.7654	0.000166286	0.0037727
ENSG00000106537.7	TSPAN13	4864.14	1.01042	0.268711	3.76025	0.000169745	0.00384625
ENSG00000236393.1	AC091806.1	116.37	-1.99011	0.529576	-3.75793	0.000171322	0.00387701
ENSG00000008517.16	IL32	11417.5	1.19815	0.319037	3.75554	0.000172969	0.00390927
ENSG00000150594.6	ADRA2A	69.8163	-2.20929	0.588369	-3.75493	0.000173391	0.0039138
ENSG00000111665.11	CDCA3	283.672	-1.42783	0.380307	-3.7544	0.000173755	0.00391703
ENSG00000198056.13	PRIM1	151.649	-1.5887	0.423543	-3.75098	0.000176148	0.00396591
ENSG00000089685.14	BIRC5	1650.98	-1.34334	0.358387	-3.7483	0.000178037	0.00400334
ENSG00000182752.9	PAPPA	117.381	-2.14338	0.572963	-3.74088	0.00018338	0.00411824
ENSG00000143819.12	EPHX1	210.775	1.50271	0.402321	3.73511	0.000187636	0.00420847
ENSG00000137474.20	MYO7A	223.133	-1.67581	0.448716	-3.73467	0.000187962	0.00421044
ENSG00000128641.18	MYO1B	9741.76	1.26741	0.339452	3.73369	0.000188698	0.00421712
ENSG00000145934.16	TENM2	29.2584	3.19529	0.855813	3.73363	0.000188737	0.00421712
ENSG00000107611.15	CUBN	2011.21	1.06324	0.284927	3.73162	0.000190251	0.00424558
ENSG00000166974.12	MAPRE2	4568.06	-1.19246	0.319655	-3.73047	0.000191122	0.00425963
ENSG00000197879.16	MYO1C	10895.2	-0.996663	0.267315	-3.72842	0.00019268	0.00428896
ENSG00000160932.10	LY6E	292.252	-2.00223	0.537242	-3.72686	0.000193878	0.0043102
ENSG00000149591.16	TAGLN	903.159	-1.85536	0.498282	-3.72351	0.000196471	0.00436235
ENSG00000103490.13	PYCARD	205.614	-1.78738	0.480491	-3.71991	0.000199296	0.00441952
ENSG00000186185.13	KIF18B	273.252	-2.05938	0.55396	-3.71756	0.000201156	0.00445517
ENSG00000181444.12	ZNF467	700.079	-1.10541	0.298042	-3.70889	0.000208169	0.00460474
ENSG00000174371.16	EXO1	359.598	-1.56704	0.423026	-3.70436	0.000211924	0.00468193
ENSG00000139880.19	CDH24	34.3232	-3.11194	0.840765	-3.70132	0.000214479	0.00473247
ENSG00000185274.11	GALNT17	19.9514	-5.3481	1.44586	-3.6989	0.000216539	0.00477195
ENSG00000101745.16	ANKRD12	1238.2	1.12469	0.304249	3.6966	0.000218508	0.00480935
ENSG00000243232.4	PCDHAC2	387.749	-1.62676	0.440592	-3.69221	0.000222312	0.00488699
ENSG00000120156.20	TEK	5858.27	-1.49139	0.404086	-3.69077	0.000223578	0.00490872
ENSG00000173376.13	NDNF	13.597	5.82761	1.5792	3.69022	0.00022406	0.0049132
ENSG00000168268.10	NT5DC2	5393.8	1.01179	0.274331	3.68821	0.000225835	0.00494598
ENSG00000105852.10	PON3	40.4925	3.19756	0.867048	3.68787	0.000226142	0.00494658
ENSG00000159231.5	CBR3	47.2778	-2.50924	0.681615	-3.68132	0.000232027	0.00506903
ENSG00000150687.11	PRSS23	69538	-0.946096	0.257149	-3.67918	0.000233988	0.00510557
ENSG00000122694.15	GLIPR2	1251.57	-1.18112	0.321072	-3.67869	0.000234434	0.00510899
ENSG00000132386.10	SERPINF1	17.6028	-5.58235	1.52114	-3.66984	0.0002427	0.00528262
ENSG00000135108.14	FBXO21	4607.92	-1.03302	0.281574	-3.66872	0.000243767	0.00529586
ENSG00000269890.1	AL353593.1	16.7474	-5.32139	1.45053	-3.66857	0.000243908	0.00529586
ENSG00000142961.14	MOB3C	2346.17	-1.02977	0.280759	-3.66782	0.00024463	0.00529778
ENSG00000162873.14	KLHDC8A	188.665	1.90891	0.520465	3.66771	0.000244732	0.00529778
ENSG00000197299.11	BLM	407.749	-1.51539	0.413191	-3.66754	0.000244896	0.00529778
ENSG00000140022.11	STON2	249.776	-1.45377	0.396465	-3.66684	0.00024557	0.00530587
ENSG00000277301.1	AL034550.2	101.535	1.87041	0.510646	3.66284	0.000249439	0.00538288
ENSG00000079385.21	CEACAM1	1157.2	1.57711	0.430952	3.65959	0.000252619	0.00544487
ENSG00000115828.16	QPCT	772.36	1.39328	0.380852	3.65834	0.000253859	0.00546492
ENSG00000131435.12	PDLIM4	116.758	-1.89433	0.517995	-3.65704	0.000255149	0.00548601
ENSG00000085999.11	RAD54L	200.688	-1.70315	0.466072	-3.65425	0.000257934	0.00553916
ENSG00000179542.15	SLITRK4	2832.64	-1.03302	0.282762	-3.65334	0.000258852	0.00555212
ENSG00000235531.9	MSC-AS1	681.084	-1.15288	0.315656	-3.65234	0.000259865	0.0055671
ENSG00000256340.8	ABCC6P1	13.9452	-6.1008	1.67089	-3.65124	0.000260981	0.00558423
ENSG00000124440.15	HIF3A	1021.21	-1.15996	0.317735	-3.65073	0.0002615	0.00558857
ENSG00000146918.19	NCAPG2	1005.84	-1.56709	0.429984	-3.64453	0.000267876	0.00571447
ENSG00000254687.1	AC009646.2	13.551	5.92838	1.62672	3.64438	0.000268038	0.00571447
ENSG00000107165.12	TYRP1	15.2066	-5.57208	1.53124	-3.63894	0.000273761	0.00582255
ENSG00000251095.6	AC097478.1	64.6173	2.45064	0.673449	3.63894	0.000273766	0.00582255
ENSG00000130035.7	GALNT8	570.448	-1.3224	0.363692	-3.63605	0.000276849	0.00588104
ENSG00000141934.9	PLPP2	63.6827	3.17635	0.873747	3.63531	0.000277642	0.00589081
ENSG00000075213.10	SEMA3A	73.1695	-2.43784	0.671063	-3.63281	0.000280356	0.00593845
ENSG00000187699.10	C2orf88	19.9267	-5.34526	1.47146	-3.63262	0.000280559	0.00593845
ENSG00000257702.3	LBX2-AS1	157.714	-1.73604	0.477977	-3.63205	0.000281174	0.00594435
ENSG00000106789.12	CORO2A	21.2658	-4.19451	1.15653	-3.62679	0.000286962	0.00605689
ENSG00000129596.4	CDO1	205.959	-1.48553	0.409622	-3.6266	0.000287183	0.00605689
ENSG00000131016.16	AKAP12	9616.36	-0.937808	0.25897	-3.62129	0.000293134	0.00617504
ENSG00000089041.16	P2RX7	57.4138	-3.08486	0.852018	-3.62065	0.00029386	0.00618296
ENSG00000175567.8	UCP2	432.216	-1.5191	0.419637	-3.62003	0.000294573	0.00619058
ENSG00000115657.13	ABCB6	344.266	-1.23745	0.342037	-3.6179	0.000297007	0.00622911
ENSG00000276550.4	HERC2P2	1496.7	1.53788	0.425086	3.61781	0.000297111	0.00622911
ENSG00000025039.14	RRAGD	804.258	1.22323	0.33838	3.61496	0.000300388	0.00629036
ENSG00000100906.10	NFKBIA	3032.02	1.23252	0.341034	3.61406	0.000301444	0.00629324
ENSG00000146674.14	IGFBP3	30593.4	0.947093	0.262068	3.61393	0.000301594	0.00629324
ENSG00000232310.7	AL078590.3	17.9833	4.63389	1.28211	3.61427	0.000301193	0.00629324
ENSG00000162520.14	SYNC	36.0765	-3.44399	0.953328	-3.61259	0.00030315	0.00631824
ENSG00000104722.13	NEFM	42.7795	-2.64186	0.732555	-3.60637	0.000310511	0.00646405
ENSG00000162433.14	AK4	272.433	-1.45249	0.403038	-3.60386	0.00031352	0.00651901
ENSG00000111913.18	RIPOR2	34.6221	-3.32889	0.923886	-3.60314	0.0003144	0.00652963
ENSG00000127580.16	WDR24	541.656	-1.13756	0.316327	-3.59616	0.000322951	0.00669934
ENSG00000120896.13	SORBS3	1716.82	-1.03293	0.287255	-3.59585	0.000323337	0.00669948
ENSG00000183715.13	OPCML	14.6982	-5.65858	1.57504	-3.59266	0.000327317	0.00677401
ENSG00000163840.9	DTX3L	465.71	-1.21768	0.339228	-3.58956	0.000331237	0.00684711
ENSG00000112972.14	HMGCS1	4746.93	-1.21938	0.339745	-3.58911	0.000331807	0.00685089
ENSG00000123473.15	STIL	395.43	-1.79557	0.500337	-3.58872	0.000332301	0.00685308
ENSG00000276231.4	PIK3R6	49.8783	3.72604	1.03837	3.58835	0.000332778	0.00685491
ENSG00000144283.21	PKP4	739.741	1.18118	0.329667	3.58294	0.000339747	0.00699033
ENSG00000012048.21	BRCA1	297.311	-1.725	0.481879	-3.57974	0.000343932	0.00705181
ENSG00000183166.10	CALN1	28.3666	-3.89201	1.08715	-3.58003	0.00034356	0.00705181
ENSG00000259753.1	AC068234.1	20.9686	-4.76798	1.33188	-3.57989	0.000343742	0.00705181
ENSG00000099937.10	SERPIND1	46.9377	-2.8142	0.787057	-3.5756	0.00034942	0.00715602
ENSG00000057149.15	SERPINB3	21.1251	4.92421	1.37739	3.57503	0.000350187	0.00716342
ENSG00000111247.14	RAD51AP1	280.276	-1.28133	0.358728	-3.57187	0.000354436	0.00724197
ENSG00000143322.19	ABL2	3968.77	0.940654	0.263392	3.57132	0.000355193	0.00724905
ENSG00000144063.3	MALL	79.2989	-2.17994	0.611256	-3.56632	0.00036203	0.00737156
ENSG00000179862.6	CITED4	712.67	1.30985	0.36727	3.56645	0.000361854	0.00737156
ENSG00000168824.14	NSG1	19.5148	-4.86518	1.36566	-3.56251	0.000367322	0.00747071
ENSG00000103485.17	QPRT	106.678	-2.378	0.667986	-3.55996	0.00037091	0.00753502
ENSG00000112742.9	TTK	351.916	-1.79078	0.503628	-3.55576	0.000376889	0.00764769
ENSG00000157483.8	MYO1E	5277.24	-1.12132	0.315411	-3.55511	0.000377821	0.00765781
ENSG00000109906.13	ZBTB16	72.3166	-2.12248	0.597306	-3.55341	0.000380265	0.00769852
ENSG00000152785.6	BMP3	13.4725	-5.68095	1.60014	-3.55028	0.000384815	0.00778171
ENSG00000189057.10	FAM111B	310.575	-1.38384	0.389919	-3.54904	0.000386637	0.00780963
ENSG00000058404.19	CAMK2B	35.3023	-2.90367	0.818467	-3.54769	0.000388622	0.00784077
ENSG00000157927.16	RADIL	22.1375	-4.05668	1.14504	-3.54283	0.000395851	0.00797749
ENSG00000161888.11	SPC24	145.438	-1.61499	0.456032	-3.54139	0.000398019	0.00801207
ENSG00000123983.13	ACSL3	11340.8	-1.22189	0.345311	-3.53853	0.000402361	0.00809025
ENSG00000073008.14	PVR	3878.18	-1.06898	0.302122	-3.53822	0.000402829	0.00809045
ENSG00000282301.2	CYP3A7-CYP3A51P	12.918	6.36945	1.8013	3.53603	0.000406186	0.00814862
ENSG00000004139.13	SARM1	1253.16	-1.19048	0.336811	-3.53456	0.000408462	0.00818498
ENSG00000159640.15	ACE	1976.73	1.09913	0.311013	3.53403	0.00040928	0.00819209
ENSG00000117122.13	MFAP2	287.377	-1.5423	0.437062	-3.52879	0.000417472	0.00834661
ENSG00000141429.13	GALNT1	24701.7	-1.0431	0.295866	-3.52557	0.000422578	0.00843915
ENSG00000206052.10	DOK6	210.893	1.37704	0.390749	3.52412	0.000424894	0.00847582
ENSG00000108932.11	SLC16A6	89.4601	2.44225	0.693259	3.52285	0.000426934	0.00850691
ENSG00000013619.13	MAMLD1	1067.12	-1.04864	0.29782	-3.52106	0.000429817	0.00855472
ENSG00000149781.12	FERMT3	1064.22	-1.71659	0.487721	-3.51962	0.000432174	0.00859194
ENSG00000141569.11	TRIM65	814.732	-1.02877	0.29266	-3.51523	0.000439371	0.00872521
ENSG00000104267.9	CA2	35.1886	3.95783	1.12757	3.51006	0.000448004	0.00888535
ENSG00000186340.15	THBS2	149.883	-2.31049	0.658297	-3.5098	0.00044844	0.00888535
ENSG00000104635.13	SLC39A14	2622.5	-1.34233	0.382938	-3.50535	0.000456002	0.00902506
ENSG00000170522.9	ELOVL6	1015.25	-1.28866	0.367722	-3.50443	0.000457583	0.00904622
ENSG00000100162.14	CENPM	238.894	-1.37888	0.393852	-3.50102	0.000463482	0.00914239
ENSG00000160013.8	PTGIR	31.268	-3.33983	0.9539	-3.50124	0.000463094	0.00914239
ENSG00000123243.14	ITIH5	152.57	-1.54703	0.442567	-3.49559	0.000473021	0.00930977
ENSG00000187079.16	TEAD1	572.774	1.17536	0.336228	3.49573	0.000472761	0.00930977
ENSG00000182674.5	KCNB2	9.66647	-6.58147	1.8852	-3.49113	0.000480982	0.00945593
ENSG00000204969.6	PCDHA2	305.335	1.25801	0.360463	3.49	0.000483027	0.00948558
ENSG00000101945.16	SUV39H1	381.582	-1.44241	0.413345	-3.48959	0.000483758	0.00948939
ENSG00000004468.12	CD38	85.081	-1.84068	0.52761	-3.48871	0.00048535	0.00951007
ENSG00000168348.3	INSM2	18.8391	5.04822	1.4473	3.48803	0.000486591	0.00952381
ENSG00000141338.13	ABCA8	45.5885	2.78878	0.800024	3.48587	0.000490546	0.00959061
ENSG00000261175.6	LINC02188	124.332	-2.43971	0.700001	-3.4853	0.000491591	0.00960043
ENSG00000175305.17	CCNE2	603.282	-1.23613	0.355158	-3.48049	0.00050049	0.00976342
ENSG00000142733.15	MAP3K6	327.862	-1.34173	0.385863	-3.47721	0.000506656	0.00987281
ENSG00000175967.3	FLJ34503	62.1289	2.28691	0.65791	3.47603	0.000508892	0.00990546
ENSG00000014138.8	POLA2	385.389	-1.2538	0.360957	-3.47354	0.000513642	0.00997595
ENSG00000087586.17	AURKA	856.737	-1.19791	0.344866	-3.47356	0.000513605	0.00997595
ENSG00000113578.17	FGF1	9.38689	-6.59518	1.89922	-3.47258	0.000515488	0.0100008
ENSG00000073111.13	MCM2	1743.49	-1.32768	0.382629	-3.46987	0.000520701	0.0100842
ENSG00000177602.5	HASPIN	106.939	-2.07999	0.599463	-3.46976	0.000520927	0.0100842
ENSG00000163751.3	CPA3	59.4481	-2.55466	0.73668	-3.4678	0.000524733	0.0101467
ENSG00000154839.9	SKA1	263.899	-1.53881	0.443929	-3.46634	0.000527589	0.0101797
ENSG00000163661.3	PTX3	363.2	-1.59008	0.458702	-3.46648	0.000527322	0.0101797
ENSG00000138028.15	CGREF1	16.4845	-4.49881	1.29816	-3.46552	0.000529206	0.0101998
ENSG00000227544.8	AC018647.1	11.5213	-6.02388	1.73865	-3.46468	0.000530859	0.0102205
ENSG00000079156.16	OSBPL6	111.38	-1.97968	0.57167	-3.46297	0.000534242	0.0102744
ENSG00000138639.17	ARHGAP24	891.143	-1.14772	0.331744	-3.45965	0.000540879	0.0103908
ENSG00000115163.14	CENPA	187.84	-1.50009	0.433855	-3.45758	0.000545042	0.0104594
ENSG00000285901.1	AC008012.1	729.595	1.19326	0.345187	3.45684	0.000546556	0.010477
ENSG00000115461.4	IGFBP5	871.667	-4.84416	1.40166	-3.45602	0.000548224	0.0104976
ENSG00000162576.16	MXRA8	13.1118	-5.74463	1.66249	-3.45543	0.000549409	0.0105089
ENSG00000124343.13	XG	42.6826	-2.41653	0.699857	-3.45289	0.00055462	0.0105971
ENSG00000188452.13	CERKL	251.191	-1.50737	0.436939	-3.44983	0.000560934	0.0106988
ENSG00000261701.7	HPR	3051.77	0.944334	0.273742	3.44973	0.000561154	0.0106988
ENSG00000133687.15	TMTC1	116.255	-1.82888	0.53032	-3.44864	0.000563416	0.0107073
ENSG00000163347.5	CLDN1	113.569	-1.88413	0.546269	-3.4491	0.000562465	0.0107073
ENSG00000183853.17	KIRREL1	1203.18	-1.10087	0.319197	-3.44888	0.000562919	0.0107073
ENSG00000152760.9	TCTEX1D1	340.662	1.17814	0.341798	3.44688	0.000567095	0.0107657
ENSG00000150967.17	ABCB9	535.524	1.26937	0.36866	3.44321	0.000574849	0.0109012
ENSG00000162607.12	USP1	1033.72	-1.16951	0.339787	-3.44189	0.000577668	0.0109429
ENSG00000168675.18	LDLRAD4	412.566	1.41028	0.409791	3.44145	0.000578601	0.0109488
ENSG00000078725.12	BRINP1	221.779	-1.40764	0.409179	-3.44017	0.000581356	0.0109892
ENSG00000066279.17	ASPM	377.786	-1.69215	0.492029	-3.43913	0.000583593	0.0110197
ENSG00000186827.10	TNFRSF4	253.227	1.58341	0.460663	3.43724	0.000587678	0.011085
ENSG00000139679.15	LPAR6	2760.52	1.12307	0.327073	3.4337	0.000595413	0.011207
ENSG00000152601.17	MBNL1	3058.57	-0.960178	0.27962	-3.43387	0.000595035	0.011207
ENSG00000164087.7	POC1A	315.015	-1.18672	0.345726	-3.43254	0.000597963	0.011243
ENSG00000136167.13	LCP1	917.128	-1.04178	0.303856	-3.42852	0.00060688	0.0113985
ENSG00000231298.6	MANCR	800.388	-1.42646	0.416163	-3.42765	0.000608821	0.0114228
ENSG00000013810.18	TACC3	1416.03	-0.982258	0.286674	-3.4264	0.000611643	0.0114575
ENSG00000059377.16	TBXAS1	156.896	1.44303	0.421205	3.42597	0.000612616	0.0114575
ENSG00000069482.6	GAL	30.4694	-2.83799	0.828344	-3.4261	0.000612312	0.0114575
ENSG00000198435.3	NRARP	446.832	1.29538	0.378251	3.42465	0.000615601	0.0115012
ENSG00000096060.14	FKBP5	2680.81	-1.27355	0.372187	-3.4218	0.000622076	0.0115977
ENSG00000163364.9	LINC01116	172.721	1.68982	0.493815	3.42198	0.00062167	0.0115977
ENSG00000172830.12	SSH3	23.8586	-3.3663	0.983932	-3.42128	0.000623282	0.0116079
ENSG00000065989.15	PDE4A	37.9541	-2.90587	0.84951	-3.42064	0.000624745	0.0116229
ENSG00000051341.13	POLQ	172.812	-1.60575	0.470852	-3.41031	0.000648891	0.0120594
ENSG00000156398.12	SFXN2	344.858	-1.24198	0.36427	-3.40951	0.000650797	0.0120694
ENSG00000270959.1	LPP-AS2	132.65	-1.52922	0.448494	-3.40967	0.000650419	0.0120694
ENSG00000149150.8	SLC43A1	296.377	-1.37144	0.402517	-3.40716	0.000656423	0.0121483
ENSG00000260630.6	SNAI3-AS1	245.385	-1.26831	0.372231	-3.40731	0.000656068	0.0121483
ENSG00000215472.10	RPL17-C18orf32	44.781	2.5584	0.75134	3.40511	0.000661364	0.0122269
ENSG00000170035.15	UBE2E3	4746	0.916085	0.269074	3.40459	0.000662647	0.0122378
ENSG00000091482.6	SMPX	14.6244	5.40532	1.58795	3.40396	0.000664169	0.0122532
ENSG00000171766.15	GATM	60.6141	-2.08873	0.614196	-3.40076	0.000671998	0.0123847
ENSG00000173281.4	PPP1R3B	3658.88	-1.12309	0.330496	-3.39821	0.000678294	0.0124852
ENSG00000211459.2	MT-RNR1	8870.34	1.08805	0.320206	3.39798	0.000678866	0.0124852
ENSG00000143578.15	CREB3L4	94.7207	-1.69713	0.499533	-3.39743	0.000680224	0.0124972
ENSG00000176871.8	WSB2	5707.31	0.87942	0.259007	3.39536	0.000685394	0.0125791
ENSG00000158825.5	CDA	132.31	-1.50393	0.442997	-3.3949	0.000686538	0.012587
ENSG00000249242.7	TMEM150C	599.635	-1.09219	0.322259	-3.38916	0.000701072	0.0128402
ENSG00000167103.11	PIP5KL1	53.7666	2.24625	0.663534	3.38528	0.000711051	0.0130094
ENSG00000256618.2	MTRNR2L1	6850.88	1.10717	0.327144	3.38435	0.000713463	0.0130401
ENSG00000091428.17	RAPGEF4	75.1019	1.98799	0.587707	3.38262	0.000717967	0.0131088
ENSG00000198838.13	RYR3	54.8161	-2.29696	0.679631	-3.37972	0.0007256	0.0132345
ENSG00000144843.11	ADPRH	151.351	-1.69207	0.50095	-3.37773	0.000730877	0.013317
ENSG00000138778.11	CENPE	327.934	-1.34705	0.39887	-3.37718	0.00073234	0.01333
ENSG00000162645.12	GBP2	2374.15	-0.913254	0.270662	-3.37414	0.000740459	0.01345
ENSG00000169129.14	AFAP1L2	4166.81	-1.18783	0.352021	-3.37431	0.000740008	0.01345
ENSG00000152229.18	PSTPIP2	1885.11	-0.968816	0.287162	-3.37376	0.000741483	0.0134548
ENSG00000154188.9	ANGPT1	32.4627	-3.39709	1.00702	-3.37342	0.000742403	0.0134577
ENSG00000127586.16	CHTF18	354.634	-1.3622	0.404159	-3.37045	0.000750454	0.0135897
ENSG00000257151.1	PWAR6	135.793	1.47569	0.437994	3.3692	0.00075387	0.0136376
ENSG00000090339.8	ICAM1	3554.82	1.0054	0.29857	3.3674	0.0007588	0.0136987
ENSG00000119655.10	NPC2	6909.62	1.04454	0.310179	3.36754	0.000758421	0.0136987
ENSG00000242574.8	HLA-DMB	266.446	1.69743	0.504588	3.364	0.000768221	0.0138546
ENSG00000013573.16	DDX11	183.027	-1.72809	0.513816	-3.36324	0.000770333	0.0138786
ENSG00000130005.12	GAMT	407.056	-1.29274	0.384493	-3.3622	0.000773231	0.0139166
ENSG00000072832.14	CRMP1	4796.36	1.11947	0.333088	3.36088	0.000776941	0.0139691
ENSG00000104518.10	GSDMD	827.846	-1.28423	0.382724	-3.3555	0.000792227	0.0142295
ENSG00000261239.6	ANKRD26P1	16.8143	-5.48823	1.63684	-3.35295	0.000799556	0.0143466
ENSG00000182575.7	NXPH3	22.1688	3.3073	0.986819	3.35147	0.000803828	0.0144086
ENSG00000178538.9	CA8	1820.18	1.1027	0.329183	3.34982	0.000808647	0.0144803
ENSG00000137154.12	RPS6	21062.1	0.948413	0.283167	3.34931	0.000810133	0.0144922
ENSG00000120539.14	MASTL	531.437	-1.13869	0.340225	-3.34688	0.000817275	0.0146052
ENSG00000175287.18	PHYHD1	26.0793	-3.21655	0.961632	-3.34489	0.000823153	0.0146954
ENSG00000173705.8	SUSD5	353.721	-1.7134	0.512544	-3.34293	0.000828994	0.0147847
ENSG00000102699.5	PARP4	8925.81	-1.1254	0.336715	-3.3423	0.000830871	0.0147883
ENSG00000186480.12	INSIG1	5289.68	-0.958925	0.286897	-3.3424	0.00083057	0.0147883
ENSG00000090530.9	P3H2	158.583	-1.58354	0.473984	-3.34091	0.00083503	0.0148219
ENSG00000164659.14	KIAA1324L	6949.55	-1.16627	0.349079	-3.341	0.000834785	0.0148219
ENSG00000170558.8	CDH2	4075.82	0.9277	0.277685	3.34083	0.000835272	0.0148219
ENSG00000204228.3	HSD17B8	28.5511	-3.00983	0.90144	-3.33891	0.000841071	0.0149098
ENSG00000198830.10	HMGN2	9157.76	-0.860282	0.257713	-3.33814	0.000843417	0.0149364
ENSG00000088882.7	CPXM1	476.376	-1.28895	0.386202	-3.3375	0.000845354	0.0149408
ENSG00000160789.19	LMNA	12614.3	-0.974018	0.291825	-3.33768	0.000844802	0.0149408
ENSG00000182197.11	EXT1	2262.1	-1.15075	0.345008	-3.33543	0.000851662	0.0150372
ENSG00000106991.13	ENG	41872.6	1.03585	0.310599	3.335	0.000852995	0.0150457
ENSG00000074527.11	NTN4	2693.83	1.4227	0.426922	3.33246	0.000860831	0.0151423
ENSG00000131018.22	SYNE1	1239.35	-1.07288	0.321956	-3.33239	0.000861041	0.0151423
ENSG00000198848.12	CES1	13.7276	-5.16885	1.55102	-3.33255	0.000860549	0.0151423
ENSG00000156970.12	BUB1B	791.762	-1.61266	0.484167	-3.33079	0.000866013	0.0151995
ENSG00000167306.19	MYO5B	158.64	1.44877	0.434935	3.331	0.000865342	0.0151995
ENSG00000175164.14	ABO	8.52055	-6.50587	1.95356	-3.33027	0.000867613	0.0152125
ENSG00000149596.6	JPH2	120.771	-1.52504	0.45804	-3.3295	0.000870026	0.0152397
ENSG00000107331.16	ABCA2	274.055	-1.24054	0.373123	-3.32474	0.000885017	0.0154822
ENSG00000134508.12	CABLES1	3591.39	1.13534	0.341502	3.32455	0.000885625	0.0154822
ENSG00000162434.11	JAK1	18075.8	-0.949965	0.285991	-3.32166	0.000894823	0.0156276
ENSG00000265688.1	MAFG-DT	74.864	-1.82196	0.548734	-3.32031	0.00089919	0.0156883
ENSG00000179627.9	ZBTB42	86.7778	-2.17399	0.654825	-3.31996	0.000900306	0.0156923
ENSG00000174428.16	GTF2IRD2B	572.852	1.03339	0.311364	3.31891	0.000903705	0.015736
ENSG00000077327.15	SPAG6	64.5235	2.18133	0.657329	3.31847	0.000905105	0.0157449
ENSG00000151503.12	NCAPD3	985.674	-1.06114	0.31985	-3.31762	0.000907883	0.0157777
ENSG00000198732.10	SMOC1	51.8874	2.31232	0.697108	3.31701	0.000909848	0.0157963
ENSG00000136944.17	LMX1B	20.3419	3.77205	1.13883	3.31221	0.000925605	0.016007
ENSG00000139734.18	DIAPH3	334.405	-1.30709	0.394571	-3.31268	0.000924077	0.016007
ENSG00000166831.8	RBPMS2	217.388	-1.27954	0.386236	-3.31284	0.000923547	0.016007
ENSG00000210082.2	MT-RNR2	185829	0.930046	0.280778	3.31238	0.000925045	0.016007
ENSG00000240583.11	AQP1	127.268	-1.86916	0.564383	-3.31187	0.000926756	0.0160112
ENSG00000108852.14	MPP2	42.5115	-2.34414	0.708442	-3.30887	0.000936744	0.0161522
ENSG00000111424.10	VDR	14.3014	-4.98476	1.50637	-3.30912	0.000935912	0.0161522
ENSG00000135749.18	PCNX2	392.756	1.14544	0.346587	3.3049	0.000950108	0.0163667
ENSG00000007968.6	E2F2	107.854	-2.36916	0.717067	-3.30395	0.000953313	0.016374
ENSG00000083857.13	FAT1	1431.45	1.01372	0.306796	3.30421	0.000952429	0.016374
ENSG00000144712.12	CAND2	58.7644	-2.40603	0.728161	-3.30425	0.000952305	0.016374
ENSG00000100626.16	GALNT16	61.0413	-2.19729	0.665123	-3.30358	0.000954587	0.01638
ENSG00000101850.12	GPR143	1349.06	0.992431	0.300463	3.30301	0.000956527	0.0163973
ENSG00000116106.11	EPHA4	139.26	1.4874	0.45074	3.2999	0.000967194	0.016555
ENSG00000279453.1	Z99129.4	105.566	-1.68219	0.509789	-3.29978	0.000967599	0.016555
ENSG00000046604.12	DSG2	336.69	-1.30048	0.394144	-3.2995	0.000968568	0.0165556
ENSG00000008277.14	ADAM22	224.225	1.28879	0.390655	3.29904	0.000970146	0.0165665
ENSG00000177410.12	ZFAS1	599.38	1.1383	0.345199	3.29753	0.000975408	0.0166403
ENSG00000121152.9	NCAPH	336.68	-1.44202	0.437343	-3.29724	0.000976395	0.0166411
ENSG00000172638.12	EFEMP2	1240.24	-1.1012	0.334047	-3.29654	0.000978852	0.0166669
ENSG00000051128.18	HOMER3	8659.33	0.990987	0.300932	3.29306	0.000991028	0.016858
ENSG00000100448.3	CTSG	50.2804	2.37423	0.72177	3.28946	0.0010038	0.0170588
ENSG00000189184.11	PCDH18	441.639	-1.88441	0.573078	-3.28822	0.00100822	0.0171174
ENSG00000108100.17	CCNY	3258.15	1.01728	0.309785	3.28384	0.00102404	0.0173361
ENSG00000109674.3	NEIL3	132.782	-1.56468	0.476465	-3.28394	0.00102366	0.0173361
ENSG00000169744.12	LDB2	5525.01	-0.8606	0.262034	-3.2843	0.00102235	0.0173361
ENSG00000136160.15	EDNRB	632.727	-1.07881	0.328589	-3.28317	0.00102645	0.0173603
ENSG00000171714.11	ANO5	198.394	-1.33943	0.408013	-3.28281	0.00102777	0.017366
ENSG00000136542.8	GALNT5	10.8609	-6.03158	1.83927	-3.27933	0.00104053	0.0175554
ENSG00000175182.14	FAM131A	67.7241	-2.1667	0.660736	-3.27921	0.00104097	0.0175554
ENSG00000054598.7	FOXC1	96.892	1.64171	0.500897	3.27755	0.00104712	0.0175896
ENSG00000058091.16	CDK14	476.503	-1.36242	0.415711	-3.27732	0.00104797	0.0175896
ENSG00000113739.10	STC2	165.816	-1.43932	0.439149	-3.27753	0.00104721	0.0175896
ENSG00000149554.12	CHEK1	602.092	-1.12061	0.341907	-3.27754	0.00104715	0.0175896
ENSG00000162631.18	NTNG1	484.481	-1.05989	0.323316	-3.27819	0.00104474	0.0175896
ENSG00000132437.17	DDC	17.3553	4.3522	1.32915	3.27443	0.00105877	0.0177539
ENSG00000110721.11	CHKA	2272.48	0.905573	0.276713	3.2726	0.00106563	0.0178182
ENSG00000143641.9	GALNT2	4612.61	-0.9674	0.295584	-3.27284	0.00106472	0.0178182
ENSG00000164120.13	HPGD	41.1945	2.55829	0.781695	3.27275	0.00106508	0.0178182
ENSG00000106785.14	TRIM14	17.2498	-4.12508	1.26109	-3.27104	0.00107154	0.0179002
ENSG00000104938.16	CLEC4M	482.719	-1.07018	0.327311	-3.2696	0.001077	0.0179744
ENSG00000018236.14	CNTN1	20.4368	-4.32543	1.32338	-3.26847	0.00108132	0.0180125
ENSG00000137812.19	KNL1	198.866	-1.45035	0.443723	-3.2686	0.00108082	0.0180125
ENSG00000197757.7	HOXC6	12.1403	-5.37291	1.64516	-3.26589	0.00109119	0.0181599
ENSG00000134775.15	FHOD3	107.924	1.73263	0.530963	3.26318	0.0011017	0.0183175
ENSG00000141753.6	IGFBP4	93650.5	0.834126	0.255745	3.26155	0.00110805	0.0184058
ENSG00000157654.17	PALM2-AKAP2	36.9282	-3.01152	0.924135	-3.25874	0.00111907	0.0185539
ENSG00000166803.12	PCLAF	605.218	-1.06424	0.32658	-3.25875	0.00111905	0.0185539
ENSG00000196821.9	C6orf106	1013.62	1.0328	0.317209	3.25588	0.0011304	0.0187066
ENSG00000282034.1	AC106886.5	334.75	1.13607	0.348908	3.25608	0.00112961	0.0187066
ENSG00000164308.16	ERAP2	1386	-1.06831	0.328163	-3.25544	0.00113219	0.0187187
ENSG00000079616.12	KIF22	1249.12	-1.00202	0.307844	-3.25495	0.00113412	0.0187331
ENSG00000171860.4	C3AR1	81.1292	1.93919	0.59617	3.25274	0.00114297	0.0188617
ENSG00000138829.11	FBN2	1137.99	-1.47406	0.453271	-3.25204	0.00114578	0.0188904
ENSG00000152128.13	TMEM163	952.948	-0.998985	0.307358	-3.25023	0.0011531	0.0189934
ENSG00000123472.12	ATPAF1	1208.38	-1.10635	0.340549	-3.24871	0.00115928	0.0190774
ENSG00000184838.14	PRR16	9.02345	-6.27014	1.93029	-3.2483	0.00116098	0.0190876
ENSG00000143341.11	HMCN1	239.854	1.64603	0.506925	3.24708	0.00116595	0.0191515
ENSG00000015413.9	DPEP1	901.54	1.12185	0.34562	3.24591	0.00117077	0.0192128
ENSG00000189143.9	CLDN4	15.1399	-4.56158	1.40576	-3.24493	0.00117481	0.0192612
ENSG00000105856.13	HBP1	4048.91	-0.865676	0.267136	-3.24058	0.00119285	0.0195388
ENSG00000143344.15	RGL1	6043.59	-1.03609	0.319774	-3.24006	0.00119505	0.0195567
ENSG00000173598.13	NUDT4	62257.3	-0.902393	0.278537	-3.23976	0.00119629	0.0195589
ENSG00000133110.14	POSTN	713.119	-1.4962	0.461865	-3.23948	0.00119749	0.0195604
ENSG00000022267.16	FHL1	951.527	1.02021	0.315004	3.23871	0.00120071	0.0195769
ENSG00000102383.13	ZDHHC15	29.8602	-2.97365	0.918094	-3.23894	0.00119974	0.0195769
ENSG00000198826.10	ARHGAP11A	707.432	-1.44037	0.444799	-3.23825	0.00120266	0.0195905
ENSG00000101447.14	FAM83D	699.207	-1.29457	0.399977	-3.23662	0.00120954	0.0196845
ENSG00000142731.10	PLK4	293.097	-1.55472	0.480555	-3.23526	0.00121533	0.0197605
ENSG00000114999.7	TTL	1932.6	0.974244	0.301466	3.23168	0.00123063	0.019991
ENSG00000180855.15	ZNF443	312.015	1.14696	0.354989	3.23098	0.00123368	0.0200221
ENSG00000143839.14	REN	9.15648	-6.23589	1.93058	-3.23005	0.00123767	0.0200685
ENSG00000196440.11	ARMCX4	50.9381	2.0782	0.64377	3.22817	0.00124585	0.0201826
ENSG00000173442.12	EHBP1L1	39.5276	-3.05959	0.947884	-3.22781	0.00124743	0.0201897
ENSG00000204851.6	PNMA8B	11.1013	-5.47712	1.69712	-3.2273	0.00124963	0.0202067
ENSG00000131797.12	CLUHP3	48.2099	2.25109	0.697715	3.22637	0.0012537	0.020254
ENSG00000173540.12	GMPPB	1456.7	-0.900416	0.279118	-3.22593	0.00125564	0.0202669
ENSG00000114315.3	HES1	1065.84	0.957792	0.296949	3.22544	0.00125778	0.0202828
ENSG00000170390.15	DCLK2	296.498	1.1609	0.359983	3.22488	0.00126026	0.0203044
ENSG00000278175.3	GLIDR	220.675	1.21842	0.377866	3.22447	0.00126208	0.0203151
ENSG00000118804.8	STBD1	122.286	-1.58949	0.493359	-3.22177	0.00127403	0.0204701
ENSG00000180190.11	TDRP	1054.56	0.983519	0.305273	3.22177	0.001274	0.0204701
ENSG00000255508.7	AP002990.1	1094.9	0.976741	0.303258	3.22083	0.0012782	0.0205186
ENSG00000103037.11	SETD6	37.9213	-2.4105	0.748923	-3.21862	0.00128809	0.0206024
ENSG00000118922.17	KLF12	625.226	1.03769	0.322389	3.21874	0.00128756	0.0206024
ENSG00000138346.14	DNA2	178.895	-1.3507	0.419605	-3.21898	0.00128649	0.0206024
ENSG00000272638.1	AC006027.1	44.8809	2.99851	0.931535	3.2189	0.00128685	0.0206024
ENSG00000077063.10	CTTNBP2	167.437	1.86509	0.579555	3.21814	0.00129026	0.0206185
ENSG00000166292.11	TMEM100	243.348	-1.32923	0.413186	-3.21703	0.00129526	0.0206797
ENSG00000106351.12	AGFG2	1521.28	-1.0478	0.325752	-3.21657	0.00129733	0.020694
ENSG00000152154.10	TMEM178A	3172.86	-0.876575	0.27319	-3.20867	0.00133351	0.021252
ENSG00000154127.9	UBASH3B	149.088	-1.57578	0.49218	-3.20164	0.00136649	0.0217579
ENSG00000163017.13	ACTG2	20.4732	-4.18088	1.30763	-3.1973	0.00138719	0.0220633
ENSG00000165704.14	HPRT1	947.798	-0.942164	0.294693	-3.1971	0.00138817	0.0220633
ENSG00000172183.14	ISG20	280.264	-1.77425	0.555201	-3.19569	0.00139498	0.0221517
ENSG00000185630.18	PBX1	471.659	-1.01022	0.31635	-3.19336	0.00140627	0.022311
ENSG00000109062.11	SLC9A3R1	1294.25	-0.910868	0.285332	-3.19231	0.00141142	0.0223725
ENSG00000214435.7	AS3MT	18.2901	-4.12765	1.29315	-3.19192	0.0014133	0.0223791
ENSG00000263843.1	AC022211.2	29.073	-2.92006	0.91489	-3.1917	0.00141436	0.0223791
ENSG00000099284.13	H2AFY2	434.304	-1.15761	0.362734	-3.19135	0.00141607	0.0223861
ENSG00000156675.15	RAB11FIP1	964.58	-0.916205	0.287128	-3.19092	0.00141818	0.0223994
ENSG00000165061.14	ZMAT4	35.602	2.40765	0.754724	3.19011	0.0014222	0.0224291
ENSG00000171873.7	ADRA1D	14.1385	5.251	1.64607	3.19003	0.0014226	0.0224291
ENSG00000162413.16	KLHL21	939.445	-1.10009	0.344888	-3.1897	0.00142419	0.0224341
ENSG00000157470.11	FAM81A	22.7134	-3.18083	0.997946	-3.18737	0.00143572	0.0225956
ENSG00000155367.15	PPM1J	73.6968	-1.8226	0.572078	-3.18592	0.00144292	0.0226888
ENSG00000072163.19	LIMS2	37.3838	2.76784	0.868937	3.18531	0.00144597	0.0227165
ENSG00000158402.19	CDC25C	125.444	-1.92959	0.605829	-3.18505	0.00144729	0.0227171
ENSG00000169851.15	PCDH7	42.0961	-2.957	0.928665	-3.18414	0.00145186	0.0227686
ENSG00000141469.17	SLC14A1	13.8764	-4.54523	1.42762	-3.18379	0.0014536	0.0227757
ENSG00000007908.15	SELE	150.47	1.69416	0.532173	3.18348	0.00145517	0.02278
ENSG00000091986.15	CCDC80	620.987	-1.14694	0.36056	-3.18101	0.00146764	0.0229356
ENSG00000159842.15	ABR	877.725	-1.00628	0.316342	-3.18099	0.0014677	0.0229356
ENSG00000023697.12	DERA	2085.71	-0.872588	0.274458	-3.17931	0.00147626	0.0230489
ENSG00000181804.14	SLC9A9	266.845	-1.15368	0.363118	-3.17714	0.00148737	0.0232019
ENSG00000130821.15	SLC6A8	180.882	1.59472	0.502033	3.17651	0.00149056	0.0232312
ENSG00000066032.18	CTNNA2	22.4012	4.68259	1.4756	3.17334	0.00150694	0.0234425
ENSG00000152669.8	CCNO	65.804	-1.95543	0.616166	-3.17355	0.00150588	0.0234425
ENSG00000175505.10	CLCF1	26.0749	-3.10333	0.978006	-3.17312	0.0015081	0.0234425
ENSG00000146281.5	PM20D2	339.536	-1.62289	0.511694	-3.17159	0.00151606	0.0235375
ENSG00000163219.11	ARHGAP25	202.31	1.45742	0.459545	3.17144	0.00151687	0.0235375
ENSG00000136111.13	TBC1D4	5802.84	0.891767	0.281307	3.17009	0.00152393	0.0236263
ENSG00000228830.1	AL160408.2	177.84	1.31514	0.415098	3.16825	0.00153358	0.023755
ENSG00000135346.8	CGA	13.2576	-4.92044	1.5533	-3.16774	0.00153629	0.0237762
ENSG00000185483.11	ROR1	1950.26	1.1782	0.372158	3.16587	0.00154622	0.0239089
ENSG00000170161.6	AL512625.1	122.94	1.42891	0.451425	3.16534	0.00154901	0.0239311
ENSG00000156265.15	MAP3K7CL	159.948	-1.58871	0.501998	-3.16477	0.00155204	0.023957
ENSG00000006432.15	MAP3K9	87.9356	1.81177	0.572616	3.16402	0.00155605	0.023998
ENSG00000136261.14	BZW2	5213.83	0.820011	0.259283	3.16261	0.00156361	0.0240935
ENSG00000159399.9	HK2	356.87	-1.44998	0.458578	-3.1619	0.00156742	0.0241312
ENSG00000226363.3	HAGLROS	60.4591	2.05295	0.649431	3.16116	0.00157143	0.0241718
ENSG00000166016.5	ABTB2	2233.63	0.938718	0.297288	3.15761	0.0015907	0.024447
ENSG00000180340.6	FZD2	38.126	-2.53169	0.802019	-3.15664	0.00159597	0.0245066
ENSG00000128596.16	CCDC136	18.2755	-4.13106	1.30958	-3.15449	0.00160778	0.0246666
ENSG00000198873.11	GRK5	3205.19	0.929064	0.294603	3.15361	0.00161263	0.0247196
ENSG00000129173.12	E2F8	134.898	-1.89969	0.602559	-3.1527	0.00161766	0.0247751
ENSG00000224032.6	EPB41L4A-AS1	205.062	1.24922	0.396383	3.15156	0.00162401	0.0248508
ENSG00000144583.4	MARCH4	845.962	-1.24979	0.396704	-3.15044	0.00163027	0.0249035
ENSG00000271121.2	NUDT4P2	1905.25	-0.90696	0.287884	-3.15044	0.00163026	0.0249035
ENSG00000101842.13	VSIG1	64.4247	1.8638	0.591684	3.14999	0.00163277	0.0249201
ENSG00000145358.6	DDIT4L	76.3779	-1.98153	0.629397	-3.14829	0.00164227	0.0250435
ENSG00000076382.16	SPAG5	886.783	-1.51166	0.480368	-3.14688	0.00165025	0.0251042
ENSG00000176890.15	TYMS	2744.76	-0.861003	0.273603	-3.14691	0.00165005	0.0251042
ENSG00000184584.12	TMEM173	596.47	-1.03119	0.32769	-3.14683	0.00165051	0.0251042
ENSG00000101868.10	POLA1	819.433	-1.16013	0.36883	-3.14543	0.00165844	0.0252031
ENSG00000101911.12	PRPS2	595.89	-1.0922	0.347353	-3.14436	0.00166449	0.0252734
ENSG00000184574.9	LPAR5	10.4297	-5.30764	1.69042	-3.13984	0.00169041	0.025645
ENSG00000229391.7	HLA-DRB6	22.718	3.14074	1.00062	3.1388	0.00169639	0.0257136
ENSG00000068615.18	REEP1	467.749	1.42647	0.454792	3.13654	0.00170957	0.0258911
ENSG00000116183.10	PAPPA2	8.10235	-6.23265	1.98754	-3.13586	0.00171349	0.0259283
ENSG00000103449.11	SALL1	93.2401	1.85082	0.590315	3.1353	0.00171676	0.0259555
ENSG00000007384.15	RHBDF1	3448.24	-0.851054	0.271615	-3.13331	0.00172849	0.026104
ENSG00000172331.11	BPGM	2205.86	0.936998	0.299061	3.13313	0.00172953	0.026104
ENSG00000108669.16	CYTH1	1887.04	0.862797	0.275436	3.13248	0.00173337	0.0261301
ENSG00000168765.16	GSTM4	107.206	-1.50581	0.480731	-3.13234	0.00173422	0.0261301
ENSG00000133863.8	TEX15	13.0912	-4.77256	1.52528	-3.12898	0.00175416	0.0263855
ENSG00000206538.8	VGLL3	104.608	-7.11644	2.2742	-3.1292	0.00175283	0.0263855
ENSG00000272168.6	CASC15	252.234	1.30979	0.418727	3.12803	0.00175981	0.026448
ENSG00000171121.16	KCNMB3	35.2078	2.37209	0.758716	3.12645	0.0017693	0.026568
ENSG00000064225.12	ST3GAL6	4054.42	-0.869628	0.278224	-3.12564	0.0017742	0.0265929
ENSG00000130762.14	ARHGEF16	80.6583	-1.82274	0.583131	-3.12578	0.00177336	0.0265929
ENSG00000183828.14	NUDT14	2863.46	1.00211	0.32063	3.12543	0.00177547	0.0265929
ENSG00000168961.16	LGALS9	22.3635	3.50561	1.12178	3.12504	0.00177783	0.0266057
ENSG00000182240.15	BACE2	4014.1	0.828097	0.265054	3.12425	0.00178258	0.0266543
ENSG00000060140.8	STYK1	18.0233	-4.03654	1.29238	-3.12334	0.00178814	0.0267148
ENSG00000166444.18	ST5	1015.51	0.961978	0.308227	3.121	0.00180237	0.0269047
ENSG00000183751.14	TBL3	1646.88	-0.909362	0.291624	-3.11827	0.00181918	0.0271327
ENSG00000100739.10	BDKRB1	13.4308	-5.64347	1.81004	-3.11787	0.00182165	0.0271466
ENSG00000177570.14	SAMD12	602.455	0.970636	0.311491	3.11609	0.00183266	0.0272876
ENSG00000105894.11	PTN	9.34773	-5.69045	1.8276	-3.11362	0.00184806	0.0274938
ENSG00000162825.16	NBPF20	589.945	1.04145	0.33459	3.11263	0.00185429	0.0275633
ENSG00000260342.2	AC138811.2	313.82	1.19682	0.384653	3.11142	0.00186192	0.0276534
ENSG00000115008.5	IL1A	1359.2	0.88887	0.285828	3.10981	0.00187211	0.0277814
ENSG00000173805.15	HAP1	81.7841	1.8256	0.587136	3.10934	0.00187507	0.027802
ENSG00000173757.9	STAT5B	2230.22	-0.939766	0.302365	-3.10806	0.00188322	0.0278995
ENSG00000253958.1	CLDN23	27.3181	-3.21422	1.03444	-3.10722	0.00188857	0.0279552
ENSG00000152518.7	ZFP36L2	5720.14	0.864596	0.278284	3.10689	0.00189068	0.0279631
ENSG00000156521.13	TYSND1	265.988	-1.1429	0.367964	-3.106	0.00189639	0.028024
ENSG00000101096.19	NFATC2	328.013	1.50658	0.485167	3.10529	0.00190093	0.0280678
ENSG00000117724.12	CENPF	1097.32	-1.03472	0.333241	-3.10502	0.00190268	0.02807
ENSG00000113805.8	CNTN3	34.4838	-2.66363	0.858032	-3.10435	0.00190696	0.0281098
ENSG00000112893.9	MAN2A1	3223.67	-0.888335	0.286213	-3.10375	0.00191083	0.0281434
ENSG00000004809.13	SLC22A16	8.37124	-6.14943	1.98192	-3.10276	0.00191725	0.0281675
ENSG00000182247.9	UBE2E2	1360.68	0.861162	0.277546	3.10278	0.00191713	0.0281675
ENSG00000197308.9	GATA3-AS1	124.484	-1.45521	0.468947	-3.10314	0.00191478	0.0281675
ENSG00000109572.13	CLCN3	5714.59	-0.87397	0.281805	-3.10133	0.00192657	0.0282808
ENSG00000100092.22	SH3BP1	26.8536	-3.36417	1.08548	-3.09923	0.00194022	0.0284341
ENSG00000111077.17	TNS2	1630.12	-0.955434	0.308259	-3.09945	0.00193879	0.0284341
ENSG00000006468.13	ETV1	472.12	-1.12762	0.363997	-3.09787	0.00194914	0.0285175
ENSG00000229619.3	MBNL1-AS1	48.1247	-2.3638	0.762983	-3.0981	0.00194766	0.0285175
ENSG00000107518.17	ATRNL1	175.242	1.6134	0.520914	3.09725	0.00195325	0.0285382
ENSG00000153443.12	UBALD1	137.14	-1.40605	0.45398	-3.09717	0.00195379	0.0285382
ENSG00000104490.17	NCALD	368.647	1.10365	0.356391	3.09673	0.00195666	0.0285565
ENSG00000213918.10	DNASE1	290.874	1.12487	0.363368	3.09568	0.00196365	0.028635
ENSG00000174348.13	PODN	43.5907	-3.02427	0.977101	-3.09514	0.00196719	0.0286629
ENSG00000254585.3	MAGEL2	295.419	-1.4334	0.463481	-3.09269	0.00198352	0.028877
ENSG00000162373.12	BEND5	12.967	-4.91949	1.59112	-3.09183	0.00198923	0.0289364
ENSG00000230844.2	ZNF674-AS1	140.019	-1.34638	0.435575	-3.09103	0.00199461	0.0289907
ENSG00000164761.8	TNFRSF11B	63.1102	1.94816	0.630522	3.08976	0.00200315	0.0290909
ENSG00000134324.11	LPIN1	1672.14	-0.842203	0.272644	-3.08902	0.00200818	0.02914
ENSG00000163072.15	NOSTRIN	230.098	1.35452	0.438752	3.08721	0.00202045	0.0292941
ENSG00000117298.15	ECE1	40710.1	-0.907589	0.294134	-3.08563	0.00203121	0.0293538
ENSG00000137727.12	ARHGAP20	26.0098	-3.50536	1.13599	-3.08574	0.00203044	0.0293538
ENSG00000139278.9	GLIPR1	218.24	-1.27059	0.41172	-3.08604	0.00202839	0.0293538
ENSG00000146122.16	DAAM2	15.0477	-4.02791	1.30514	-3.08618	0.00202745	0.0293538
ENSG00000204381.11	LAYN	283.526	1.23897	0.401596	3.08512	0.00203472	0.0293804
ENSG00000169902.14	TPST1	1081.21	-0.958629	0.310758	-3.08481	0.00203684	0.029387
ENSG00000162998.4	FRZB	44.3093	2.15887	0.700148	3.08344	0.00204621	0.0294981
ENSG00000146374.13	RSPO3	37.957	-2.29148	0.743232	-3.08313	0.00204836	0.0295051
ENSG00000111266.8	DUSP16	524.219	-0.967221	0.313763	-3.08265	0.00205169	0.029529
ENSG00000070756.15	PABPC1	11597.7	0.8032	0.260798	3.07978	0.00207153	0.0297903
ENSG00000162591.15	MEGF6	3275.59	-0.855652	0.277852	-3.07953	0.0020733	0.0297914
ENSG00000247092.6	SNHG10	109.984	-1.44678	0.470076	-3.07777	0.00208557	0.0299435
ENSG00000159259.7	CHAF1B	285.685	-1.30451	0.424281	-3.07463	0.00210761	0.0302353
ENSG00000135451.12	TROAP	164.437	-1.4051	0.457106	-3.0739	0.00211282	0.0302854
ENSG00000150054.18	MPP7	104.85	1.66122	0.540832	3.07159	0.00212919	0.0304954
ENSG00000174804.3	FZD4	8758.65	-0.960787	0.313018	-3.06943	0.0021447	0.0306927
ENSG00000168615.11	ADAM9	6186.74	-1.15996	0.377972	-3.06891	0.00214843	0.0307212
ENSG00000112659.13	CUL9	382.978	-1.07064	0.349055	-3.06725	0.00216035	0.0308666
ENSG00000120802.13	TMPO	2400.76	-1.08856	0.355102	-3.06547	0.00217327	0.0310261
ENSG00000100526.19	CDKN3	289.911	-1.11973	0.365367	-3.06467	0.00217909	0.0310842
ENSG00000147889.17	CDKN2A	238.103	1.38922	0.453355	3.06431	0.00218173	0.0310967
ENSG00000064651.13	SLC12A2	2545.27	0.94562	0.30883	3.06194	0.00219904	0.0312929
ENSG00000122378.13	PRXL2A	26654.1	0.822674	0.268674	3.06199	0.00219874	0.0312929
ENSG00000129810.14	SGO1	182.595	-1.36161	0.445056	-3.05941	0.00221773	0.0315009
ENSG00000149809.14	TM7SF2	2263.72	-0.850311	0.277912	-3.05964	0.00221601	0.0315009
ENSG00000188223.9	AD000671.1	196.042	1.27942	0.418214	3.05924	0.002219	0.0315009
ENSG00000049239.12	H6PD	1761.61	-0.996001	0.325716	-3.05788	0.00222908	0.0316186
ENSG00000136560.13	TANK	12236.8	-0.871083	0.284911	-3.05738	0.00223279	0.0316458
ENSG00000119711.12	ALDH6A1	617.788	-1.06273	0.347671	-3.05672	0.00223772	0.0316903
ENSG00000106605.10	BLVRA	665.952	-1.02217	0.334489	-3.05591	0.00224376	0.031725
ENSG00000249459.8	ZNF286B	192.231	1.28494	0.420464	3.056	0.0022431	0.031725
ENSG00000117593.10	DARS2	938.519	-0.989326	0.323812	-3.05525	0.00224877	0.0317704
ENSG00000111057.10	KRT18	11335.1	-0.804726	0.263508	-3.0539	0.00225888	0.0318623
ENSG00000114480.12	GBE1	2081.42	-0.818782	0.268092	-3.05411	0.00225729	0.0318623
ENSG00000116954.7	RRAGC	1030.9	0.969841	0.317755	3.05216	0.002272	0.0320217
ENSG00000131831.17	RAI2	576.711	-0.955857	0.313378	-3.05017	0.00228711	0.0321834
ENSG00000143878.9	RHOB	4930.02	0.813145	0.266584	3.05024	0.00228658	0.0321834
ENSG00000133612.18	AGAP3	1508.47	0.93024	0.305048	3.04949	0.00229233	0.0322312
ENSG00000099958.14	DERL3	12.7505	-4.45892	1.463	-3.0478	0.00230523	0.0323601
ENSG00000119326.14	CTNNAL1	1898.88	-0.971811	0.318892	-3.04746	0.00230787	0.0323601
ENSG00000158560.14	DYNC1I1	71.4918	-1.93455	0.634833	-3.04733	0.00230882	0.0323601
ENSG00000174482.10	LINGO2	167.833	1.34087	0.44001	3.04737	0.00230854	0.0323601
ENSG00000145708.10	CRHBP	127.838	-1.6323	0.535796	-3.04649	0.00231532	0.0324254
ENSG00000099256.18	PRTFDC1	180.947	-1.25321	0.411447	-3.04587	0.00232012	0.0324669
ENSG00000258864.1	AC008575.1	11.479	5.92834	1.94716	3.04462	0.00232978	0.0325764
ENSG00000255730.5	AC011462.1	147.201	-2.2755	0.747652	-3.04353	0.00233821	0.0326684
ENSG00000147394.18	ZNF185	144.061	-1.32185	0.434427	-3.04275	0.00234426	0.0327271
ENSG00000139946.9	PELI2	234.304	-1.30912	0.430406	-3.04159	0.00235329	0.0327771
ENSG00000169067.3	ACTBL2	7.32262	-6.23557	2.05011	-3.04158	0.00235341	0.0327771
ENSG00000265972.5	TXNIP	3484.01	1.01953	0.335181	3.04172	0.00235228	0.0327771
ENSG00000152583.12	SPARCL1	25.1531	2.75313	0.905557	3.04026	0.00236377	0.0328696
ENSG00000173040.12	EVC2	106.867	-1.58631	0.521734	-3.04045	0.00236223	0.0328696
ENSG00000066739.11	ATG2B	420.706	-1.03572	0.340701	-3.03996	0.00236609	0.032876
ENSG00000196502.11	SULT1A1	165.571	-1.38454	0.455491	-3.03966	0.00236844	0.0328828
ENSG00000173391.8	OLR1	44.2276	-8.09846	2.66567	-3.03806	0.00238108	0.0330323
ENSG00000184292.6	TACSTD2	10.5342	-4.9877	1.64279	-3.03611	0.00239653	0.0332206
ENSG00000164045.11	CDC25A	528.974	-1.21488	0.40026	-3.03522	0.00240364	0.033293
ENSG00000144354.13	CDCA7	623.796	-1.04437	0.34429	-3.0334	0.00241811	0.0334673
ENSG00000166483.10	WEE1	1277.53	-0.952288	0.314016	-3.03261	0.00242451	0.0335295
ENSG00000261459.1	AC002310.5	13.2079	-4.9247	1.62473	-3.03109	0.00243669	0.0336717
ENSG00000177873.12	ZNF619	41.9771	-2.3864	0.787547	-3.03016	0.00244423	0.0337494
ENSG00000134030.13	CTIF	486.283	1.04298	0.344289	3.02937	0.00245066	0.0338119
ENSG00000148143.12	ZNF462	172.54	1.29427	0.427335	3.0287	0.00245607	0.03386
ENSG00000138658.15	ZGRF1	173.476	-1.31554	0.434431	-3.0282	0.00246015	0.0338797
ENSG00000151376.16	ME3	1053.25	-0.876376	0.289419	-3.02806	0.00246133	0.0338797
ENSG00000084636.17	COL16A1	11.1138	-4.92988	1.62894	-3.02643	0.00247459	0.0340327
ENSG00000104447.12	TRPS1	171.072	4.9111	1.62285	3.02622	0.00247629	0.0340327
ENSG00000177875.4	CCDC184	288.013	1.2876	0.425602	3.02537	0.00248332	0.0341028
ENSG00000163273.3	NPPC	33.4543	-2.73846	0.905348	-3.02476	0.00248828	0.0341444
ENSG00000167522.15	ANKRD11	2786.81	1.01255	0.334785	3.02447	0.00249067	0.0341506
ENSG00000185972.5	CCIN	13.2863	-4.69937	1.5542	-3.02366	0.00249735	0.0342064
ENSG00000189058.8	APOD	385.376	1.45023	0.479651	3.02351	0.00249861	0.0342064
ENSG00000141655.16	TNFRSF11A	414.991	1.13593	0.37574	3.02317	0.00250141	0.0342182
ENSG00000235770.5	LINC00607	32.5926	2.39711	0.793277	3.02178	0.00251296	0.0343496
ENSG00000184602.5	SNN	6686.83	0.811949	0.2688	3.02065	0.00252235	0.0344513
ENSG00000136122.15	BORA	171.615	-1.39218	0.461015	-3.01981	0.00252933	0.0344898
ENSG00000203930.11	LINC00632	56.6063	-1.86032	0.616027	-3.01987	0.00252883	0.0344898
ENSG00000264112.1	AC015813.1	152.501	1.51948	0.503204	3.01961	0.00253102	0.0344898
ENSG00000148798.10	INA	34.5883	-2.36699	0.784943	-3.01549	0.00256566	0.0349163
ENSG00000153294.11	ADGRF4	7.31893	-6.18923	2.05253	-3.01542	0.00256627	0.0349163
ENSG00000106003.12	LFNG	86.7124	2.05983	0.683432	3.01395	0.0025787	0.0350584
ENSG00000184445.11	KNTC1	471.208	-1.17003	0.388481	-3.0118	0.00259706	0.0352809
ENSG00000167325.14	RRM1	2667.85	-0.974381	0.323641	-3.01068	0.00260661	0.0353834
ENSG00000198910.13	L1CAM	88.3929	-8.27033	2.74965	-3.00778	0.00263164	0.0356958
ENSG00000176658.16	MYO1D	1393.1	1.05061	0.349351	3.00731	0.0026357	0.0356961
ENSG00000258749.1	AL110504.1	14.0248	4.55511	1.51468	3.00731	0.00263568	0.0356961
ENSG00000048740.18	CELF2	3051.82	0.965226	0.321016	3.00678	0.00264031	0.0357312
ENSG00000136869.14	TLR4	1573.47	1.07924	0.359021	3.00608	0.00264643	0.0357591
ENSG00000272143.1	FGF14-AS2	62.6818	-1.75115	0.58251	-3.00622	0.00264519	0.0357591
ENSG00000113119.12	TMCO6	292.665	-1.11151	0.369786	-3.00582	0.00264866	0.035762
ENSG00000148488.16	ST8SIA6	16.4049	-3.67812	1.22551	-3.0013	0.00268832	0.0362687
ENSG00000197958.12	RPL12	3601.27	0.959626	0.319761	3.00107	0.00269029	0.0362687
ENSG00000162729.13	IGSF8	711.684	-0.916953	0.305769	-2.99884	0.00271009	0.0364799
ENSG00000186469.8	GNG2	1991.68	0.888685	0.296329	2.99898	0.00270883	0.0364799
ENSG00000097046.12	CDC7	597.886	-1.11161	0.370732	-2.99843	0.00271375	0.0365014
ENSG00000170571.11	EMB	1273.51	-0.939832	0.313514	-2.99774	0.00271991	0.0365565
ENSG00000170743.16	SYT9	174.206	-1.42264	0.474615	-2.99746	0.00272242	0.0365624
ENSG00000136824.18	SMC2	818.054	-1.0237	0.341663	-2.99622	0.0027335	0.0366554
ENSG00000186088.15	GSAP	156.701	-1.35222	0.451283	-2.99638	0.00273206	0.0366554
ENSG00000183840.6	GPR39	23.8903	-3.38237	1.12915	-2.99549	0.00274004	0.0367153
ENSG00000177096.8	PHETA2	7.13067	-6.19062	2.06793	-2.99363	0.00275676	0.0369113
ENSG00000155380.11	SLC16A1	15494.3	-0.93715	0.313088	-2.99325	0.00276026	0.0369197
ENSG00000229671.2	LINC01150	13.7937	4.25207	1.42062	2.9931	0.00276156	0.0369197
ENSG00000198959.11	TGM2	26030.3	-0.92836	0.31022	-2.99259	0.00276624	0.0369543
ENSG00000121691.5	CAT	524.925	-0.953915	0.318927	-2.99101	0.00278054	0.0370892
ENSG00000224383.7	PRR29	2259.84	0.867356	0.289982	2.99107	0.00278001	0.0370892
ENSG00000147065.16	MSN	58154.5	-0.964213	0.322545	-2.98939	0.00279536	0.0372588
ENSG00000187605.15	TET3	289.763	1.06203	0.355398	2.98827	0.00280559	0.037367
ENSG00000254946.1	AC073172.2	36.278	2.30422	0.772311	2.98353	0.0028494	0.037922
ENSG00000279673.1	AC092919.2	190.882	-1.20889	0.405318	-2.98258	0.00285831	0.0380119
ENSG00000204131.9	NHSL2	1204.44	1.08578	0.364359	2.97996	0.00288285	0.0383094
ENSG00000137831.14	UACA	24289.3	-0.864387	0.290259	-2.97799	0.00290146	0.0384902
ENSG00000144847.12	IGSF11	7.25781	-6.12653	2.05718	-2.97812	0.00290026	0.0384902
ENSG00000169231.13	THBS3	323.786	-1.03827	0.348665	-2.97783	0.00290299	0.0384902
ENSG00000164506.14	STXBP5	684.506	1.00099	0.336191	2.97744	0.00290662	0.0385095
ENSG00000153132.12	CLGN	577.346	1.00591	0.337982	2.97624	0.00291811	0.0386327
ENSG00000169891.17	REPS2	313.612	-1.08553	0.364925	-2.97467	0.002933	0.0388007
ENSG00000018408.14	WWTR1	18338.6	-0.936331	0.314912	-2.97331	0.00294607	0.0389154
ENSG00000159164.9	SV2A	83.1685	-1.60515	0.53983	-2.97344	0.00294478	0.0389154
ENSG00000116032.5	GRIN3B	77.9513	-1.79732	0.604586	-2.97281	0.0029509	0.0389501
ENSG00000226742.3	HSBP1L1	42.4305	2.06355	0.694534	2.97113	0.0029671	0.0391347
ENSG00000234741.7	GAS5	793.305	0.920852	0.309986	2.97062	0.00297199	0.0391699
ENSG00000146859.6	TMEM140	512.366	0.948266	0.319265	2.97015	0.0029765	0.0392002
ENSG00000141756.18	FKBP10	2649.05	-0.937058	0.315579	-2.96933	0.00298447	0.0392758
ENSG00000251562.8	MALAT1	16316	0.831215	0.279999	2.96863	0.00299126	0.039336
ENSG00000269416.5	LINC01224	15.1608	-4.09855	1.38157	-2.96658	0.0030113	0.0395701
ENSG00000157399.14	ARSE	81.0728	1.72447	0.581469	2.96572	0.00301979	0.0396228
ENSG00000158195.10	WASF2	4930.05	0.782435	0.263827	2.96572	0.00301977	0.0396228
ENSG00000171017.10	LRRC8E	18.1897	-4.29098	1.4471	-2.96523	0.00302461	0.0396565
ENSG00000197721.16	CR1L	10.4245	-5.11163	1.72478	-2.96364	0.00304026	0.0398322
ENSG00000158869.10	FCER1G	29.6359	2.70402	0.912559	2.96311	0.00304544	0.0398409
ENSG00000185339.8	TCN2	3956.18	0.893833	0.301651	2.96314	0.00304521	0.0398409
ENSG00000148677.6	ANKRD1	2576.83	-1.00581	0.339505	-2.96257	0.00305084	0.0398821
ENSG00000034713.7	GABARAPL2	8029.17	0.913773	0.308502	2.96196	0.00305684	0.0399213
ENSG00000146094.14	DOK3	324.456	-1.11892	0.377812	-2.96158	0.00306062	0.0399213
ENSG00000157540.20	DYRK1A	193.968	1.44864	0.48911	2.96178	0.00305861	0.0399213
ENSG00000260788.5	AC009063.2	14.0682	3.81299	1.28868	2.95882	0.00308815	0.0402508
ENSG00000163808.16	KIF15	324.491	-1.49891	0.507059	-2.95609	0.00311567	0.0405795
ENSG00000021762.19	OSBPL5	351.138	-1.09389	0.370103	-2.95563	0.00312035	0.0406105
ENSG00000119969.14	HELLS	479.909	-1.07772	0.364761	-2.95459	0.00313082	0.0407168
ENSG00000139116.18	KIF21A	174.64	1.19913	0.405901	2.95424	0.00313436	0.0407329
ENSG00000198892.6	SHISA4	456.929	-0.987312	0.334345	-2.95297	0.0031473	0.0408709
ENSG00000125945.14	ZNF436	1441.11	0.8293	0.281245	2.94868	0.00319139	0.0414131
ENSG00000155363.18	MOV10	2643.34	-0.903116	0.306453	-2.947	0.00320873	0.0416076
ENSG00000111644.7	ACRBP	10.7137	-5.01511	1.7026	-2.94556	0.00322373	0.0417715
ENSG00000278730.1	AC005332.6	686.026	0.892714	0.303131	2.94498	0.00322977	0.041819
ENSG00000069702.10	TGFBR3	1556.92	-1.2069	0.409934	-2.94414	0.0032385	0.0419013
ENSG00000134138.19	MEIS2	1095.88	-0.855482	0.290596	-2.94389	0.00324116	0.0419051
ENSG00000229311.1	BX088651.2	9.19839	5.31225	1.80506	2.94298	0.00325064	0.041997
ENSG00000165879.8	FRAT1	198.02	-1.21119	0.411621	-2.94249	0.00325587	0.0420337
ENSG00000130775.15	THEMIS2	214.557	-1.37839	0.468655	-2.94116	0.00326987	0.0421837
ENSG00000134853.11	PDGFRA	56.7179	-2.13875	0.727293	-2.94069	0.00327477	0.0422161
ENSG00000129534.13	MIS18BP1	447.319	-1.01984	0.34684	-2.94037	0.00327823	0.0422257
ENSG00000153162.8	BMP6	5211.38	-1.13489	0.385994	-2.94017	0.00328029	0.0422257
ENSG00000226711.6	FAM66C	95.3743	1.49615	0.50897	2.93957	0.00328671	0.0422775
ENSG00000142541.16	RPL13A	13120	0.899121	0.306166	2.93671	0.00331715	0.0426381
ENSG00000183662.10	FAM19A1	7.61956	5.98652	2.03971	2.93498	0.00333567	0.042845
ENSG00000104889.6	RNASEH2A	516.393	-0.930066	0.316925	-2.93466	0.00333919	0.042859
ENSG00000077713.18	SLC25A43	520.268	-0.912822	0.311218	-2.93306	0.00335636	0.0430481
ENSG00000186470.13	BTN3A2	200.353	-1.2832	0.437563	-2.93259	0.00336142	0.0430818
ENSG00000071564.14	TCF3	1342.03	0.937869	0.319848	2.93223	0.00336535	0.0431009
ENSG00000041982.15	TNC	582.166	-0.988999	0.337381	-2.9314	0.00337436	0.043185
ENSG00000182389.19	CACNB4	42.5587	2.078	0.708933	2.93117	0.00337685	0.0431856
ENSG00000198763.3	MT-ND2	9984.66	0.749749	0.25584	2.93054	0.00338378	0.0432117
ENSG00000256053.7	APOPT1	2167.34	0.933291	0.318467	2.93057	0.00338342	0.0432117
ENSG00000123080.10	CDKN2C	101.133	-1.87932	0.641515	-2.9295	0.00339508	0.0433247
ENSG00000145246.13	ATP10D	1270.37	-0.982334	0.33539	-2.92893	0.00340127	0.0433724
ENSG00000118292.8	C1orf54	747.764	1.13093	0.386551	2.9257	0.00343685	0.0437944
ENSG00000263585.1	AC145207.4	18.3624	4.60371	1.57399	2.92487	0.00344605	0.0438801
ENSG00000176834.13	VSIG10	803.799	-0.924861	0.316251	-2.92446	0.0034506	0.0439063
ENSG00000112561.17	TFEB	85.4035	-1.56468	0.535743	-2.92057	0.00349392	0.0443936
ENSG00000115963.13	RND3	2673.46	0.808259	0.276737	2.92067	0.00349278	0.0443936
ENSG00000174943.10	KCTD13	478.517	0.937718	0.321181	2.91959	0.0035049	0.0445011
ENSG00000250067.11	YJEFN3	27.4604	2.66023	0.911259	2.91929	0.00350829	0.0445122
ENSG00000166311.9	SMPD1	1265.43	0.842177	0.288611	2.91804	0.00352241	0.0446593
ENSG00000036565.14	SLC18A1	35.3728	2.35861	0.808495	2.91728	0.00353095	0.0447355
ENSG00000124006.14	OBSL1	354.414	-0.980998	0.336303	-2.917	0.00353411	0.0447435
ENSG00000109084.13	TMEM97	2307.75	-0.886752	0.304049	-2.91648	0.00354004	0.0447544
ENSG00000140557.11	ST8SIA2	131.068	-1.30174	0.446317	-2.91663	0.00353838	0.0447544
ENSG00000111602.11	TIMELESS	1254.54	-1.06363	0.364996	-2.91409	0.00356722	0.0450658
ENSG00000227953.6	LINC01341	8.60423	5.31292	1.82376	2.91316	0.00357791	0.0451686
ENSG00000185652.11	NTF3	27.905	2.64577	0.908395	2.91258	0.00358454	0.0452199
ENSG00000248098.11	BCKDHA	1001.81	-0.852727	0.293004	-2.91029	0.00361089	0.0455198
ENSG00000112335.14	SNX3	12484.5	0.761165	0.261743	2.90806	0.00363679	0.045788
ENSG00000215252.11	GOLGA8B	121.938	1.4351	0.4935	2.90801	0.00363734	0.045788
ENSG00000123384.13	LRP1	89.7245	-2.01262	0.692209	-2.90754	0.00364285	0.0458247
ENSG00000107821.14	KAZALD1	17.204	-3.61125	1.24233	-2.90683	0.00365113	0.0458636
ENSG00000260772.1	AC012321.1	161.972	1.23512	0.424879	2.90699	0.00364928	0.0458636
ENSG00000285095.1	AC025887.2	13.0558	4.12323	1.41925	2.90523	0.00366988	0.0460664
ENSG00000138613.13	APH1B	959.94	-0.838394	0.288648	-2.90456	0.00367775	0.0460997
ENSG00000144339.11	TMEFF2	14.5153	3.87361	1.33361	2.9046	0.00367718	0.0460997
ENSG00000188211.8	NCR3LG1	256.483	-1.7518	0.60324	-2.90399	0.00368442	0.0461506
ENSG00000153347.9	FAM81B	26.9447	2.51166	0.865206	2.90296	0.00369657	0.04627
ENSG00000164124.10	TMEM144	54.1234	1.79486	0.618467	2.9021	0.00370665	0.0463633
ENSG00000166275.15	BORCS7	1746.21	0.822497	0.283482	2.90141	0.0037149	0.0464336
ENSG00000182134.15	TDRKH	642.836	-0.870922	0.300444	-2.89879	0.00374611	0.0467683
ENSG00000224419.1	KRT18P27	7.03122	6.04107	2.08405	2.89871	0.00374697	0.0467683
ENSG00000158077.4	NLRP14	20.4541	3.3335	1.15044	2.89758	0.00376051	0.0469042
ENSG00000102271.13	KLHL4	6285.59	-1.08348	0.373967	-2.89726	0.00376433	0.0469187
ENSG00000174963.17	ZIC4	92.2461	1.48019	0.511187	2.8956	0.00378437	0.0471352
ENSG00000271474.1	AC106881.1	18.7727	-3.06433	1.05904	-2.89349	0.00380987	0.0474195
ENSG00000125691.12	RPL23	4540.28	0.945964	0.326995	2.8929	0.00381699	0.0474413
ENSG00000183813.6	CCR4	80.4351	-1.57172	0.543281	-2.89302	0.00381561	0.0474413
ENSG00000181826.9	RELL1	801.974	0.949215	0.328652	2.88821	0.00387443	0.0481214
ENSG00000166261.10	ZNF202	458.108	-0.97135	0.336458	-2.88699	0.00388947	0.0482742
ENSG00000088356.5	PDRG1	2657.23	0.844676	0.292813	2.8847	0.0039179	0.0485918
ENSG00000282988.2	AL031777.3	40.9509	2.4007	0.832279	2.88448	0.00392056	0.0485918
ENSG00000243989.8	ACY1	316.504	-1.07137	0.37149	-2.88398	0.0039269	0.0486363
ENSG00000176887.6	SOX11	1297.89	0.994301	0.344905	2.88283	0.00394119	0.0487792
ENSG00000112531.16	QKI	4053.78	0.913289	0.317126	2.87989	0.00397814	0.0491935
ENSG00000113790.10	EHHADH	194.601	-1.14368	0.39715	-2.87972	0.00398024	0.0491935
ENSG00000109814.11	UGDH	3446.12	-0.809341	0.281085	-2.87935	0.00398499	0.0492178
ENSG00000062822.13	POLD1	1486.35	-0.808784	0.281053	-2.87769	0.004006	0.0494427
ENSG00000228436.2	AL139260.1	49.0474	2.04289	0.710033	2.87718	0.00401244	0.0494877
ENSG00000083750.12	RRAGB	669.476	0.930323	0.323374	2.87692	0.00401571	0.0494935
ENSG00000253220.2	AC084116.1	26.9167	2.47422	0.860106	2.87664	0.00401929	0.049503
ENSG00000248441.6	LINC01197	9.19574	5.13153	1.78575	2.87359	0.00405832	0.049949
ENSG00000213468.6	FIRRE	339.312	1.02553	0.357015	2.8725	0.00407232	0.0500864
ENSG00000035499.12	DEPDC1B	242.828	-1.4803	0.515481	-2.87168	0.00408302	0.0501732
ENSG00000267414.1	AC120049.1	66.6905	-1.63594	0.569711	-2.87152	0.00408505	0.0501732
ENSG00000077616.10	NAALAD2	98.0468	-1.59079	0.554054	-2.87119	0.00408935	0.0501911
ENSG00000128652.11	HOXD3	51.9191	1.9904	0.69365	2.86946	0.00411173	0.0504265
ENSG00000203668.2	CHML	548.972	-0.974975	0.339799	-2.86927	0.00411424	0.0504265
ENSG00000123416.15	TUBA1B	62978.3	-0.777687	0.271123	-2.86839	0.00412565	0.0505314
ENSG00000100889.11	PCK2	221.767	-1.20072	0.418645	-2.86811	0.00412934	0.0505416
ENSG00000053524.12	MCF2L2	43.5954	-2.26968	0.791566	-2.86733	0.00413957	0.0506316
ENSG00000262655.3	SPON1	430.251	1.13089	0.39453	2.86641	0.0041515	0.0507425
ENSG00000135363.11	LMO2	2641.83	0.800215	0.279329	2.86477	0.00417311	0.0509446
ENSG00000163568.14	AIM2	61.2176	1.71707	0.599384	2.86472	0.00417381	0.0509446
ENSG00000204310.12	AGPAT1	1935.33	0.834203	0.291231	2.8644	0.00417795	0.0509601
ENSG00000140332.15	TLE3	989.783	0.823809	0.287631	2.86412	0.00418167	0.0509703
ENSG00000144821.9	MYH15	10.412	-5.00088	1.74718	-2.86226	0.00420634	0.0512356
ENSG00000171608.15	PIK3CD	184.751	-1.13944	0.398321	-2.86059	0.00422849	0.0514048
ENSG00000182165.17	TP53TG1	3535.34	0.852466	0.298048	2.86016	0.00423422	0.0514048
ENSG00000189362.11	NEMP2	134.853	-1.27119	0.444452	-2.86013	0.00423471	0.0514048
ENSG00000248636.6	AC002070.1	48.4004	2.41658	0.844923	2.86012	0.00423478	0.0514048
ENSG00000273271.1	AP000254.1	21.3124	2.90307	1.01492	2.86039	0.00423123	0.0514048
ENSG00000128040.10	SPINK2	15.9043	3.54715	1.24053	2.85939	0.00424463	0.0514185
ENSG00000140545.14	MFGE8	760.158	-0.883848	0.309076	-2.85965	0.0042411	0.0514185
ENSG00000145022.4	TCTA	1065.49	-0.807489	0.282378	-2.8596	0.00424177	0.0514185
ENSG00000173334.3	TRIB1	573.469	-0.961571	0.336315	-2.85914	0.0042479	0.0514229
ENSG00000103489.11	XYLT1	135.446	1.43782	0.503037	2.85827	0.00425954	0.0515284
ENSG00000285517.1	LINC00941	38.8635	-2.30094	0.805323	-2.85717	0.00427437	0.0516726
ENSG00000188641.13	DPYD	398.865	-1.01918	0.356941	-2.85532	0.00429937	0.0519392
ENSG00000174721.9	FGFBP3	111.022	-1.40691	0.492787	-2.85501	0.0043036	0.0519548
ENSG00000010671.15	BTK	15.2509	-4.22445	1.4799	-2.85455	0.00430984	0.0519846
ENSG00000121068.13	TBX2	10.9787	-4.86395	1.70402	-2.85439	0.00431195	0.0519846
ENSG00000132561.13	MATN2	632.58	-1.54907	0.542984	-2.85288	0.00433253	0.0521687
ENSG00000154319.15	FAM167A	8.42382	-5.65455	1.98208	-2.85283	0.00433313	0.0521687
ENSG00000102048.15	ASB9	331.669	-1.00714	0.353343	-2.85031	0.00436767	0.052513
ENSG00000102362.15	SYTL4	419.163	-1.04384	0.36621	-2.85039	0.00436661	0.052513
ENSG00000132879.13	FBXO44	154.927	1.28595	0.451326	2.84928	0.00438186	0.0526478
ENSG00000152503.9	TRIM36	279.102	-1.04661	0.367434	-2.84842	0.00439372	0.0527545
ENSG00000054277.13	OPN3	1259.46	-0.860487	0.302163	-2.84776	0.0044028	0.0528277
ENSG00000203875.11	SNHG5	1074.84	0.960835	0.337443	2.8474	0.00440782	0.052852
ENSG00000228157.4	AC007952.2	54.1436	1.80893	0.635455	2.84667	0.00441792	0.0529372
ENSG00000104695.12	PPP2CB	950.26	0.889465	0.312482	2.84645	0.00442098	0.0529379
ENSG00000134909.18	ARHGAP32	184.435	1.13575	0.399139	2.84549	0.00443434	0.053026
ENSG00000197077.13	KIAA1671	1825.93	0.790654	0.277854	2.84557	0.00443317	0.053026
ENSG00000257167.2	TMPO-AS1	65.398	-1.70934	0.60083	-2.84496	0.00444168	0.0530779
ENSG00000177984.6	LCN15	49.7563	2.53091	0.889859	2.84417	0.00445279	0.0531748
ENSG00000090621.13	PABPC4	1579	0.826463	0.290611	2.84388	0.00445684	0.0531872
ENSG00000134516.16	DOCK2	23.542	-3.55507	1.25033	-2.8433	0.0044649	0.0532474
ENSG00000272078.1	AL139423.1	15.0518	3.67889	1.29411	2.84281	0.00447184	0.0532942
ENSG00000125746.16	EML2	191.56	-1.14549	0.403109	-2.84163	0.00448833	0.0534547
ENSG00000080839.11	RBL1	362.1	-1.08807	0.383105	-2.84013	0.00450958	0.0536355
ENSG00000157388.16	CACNA1D	44.809	-2.1802	0.767586	-2.84033	0.00450669	0.0536355
ENSG00000000971.15	CFH	44.2765	-2.37465	0.836207	-2.83979	0.00451428	0.0536552
ENSG00000071575.11	TRIB2	802.921	1.02206	0.360087	2.83837	0.00453453	0.0537513
ENSG00000077092.18	RARB	99.7737	1.82552	0.643042	2.83889	0.00452709	0.0537513
ENSG00000106031.8	HOXA13	18.5227	3.87198	1.36398	2.83874	0.00452916	0.0537513
ENSG00000123095.5	BHLHE41	21.6812	2.82839	0.996419	2.83856	0.00453183	0.0537513
ENSG00000254996.5	ANKHD1-EIF4EBP3	370.948	1.12797	0.397502	2.83765	0.00454473	0.0538362
ENSG00000133315.10	MACROD1	124.337	-1.34324	0.473605	-2.83621	0.00456527	0.0540432
ENSG00000130997.16	POLN	32.302	2.22679	0.78538	2.8353	0.00457822	0.0541603
ENSG00000105642.15	KCNN1	116.738	1.36165	0.480528	2.83365	0.00460199	0.0543687
ENSG00000272293.1	AC083964.1	48.0352	1.86773	0.659103	2.83374	0.00460067	0.0543687
ENSG00000183856.10	IQGAP3	51.9812	-2.30294	0.812799	-2.83334	0.00460644	0.0543849
ENSG00000181852.17	RNF41	1509.6	-0.801868	0.283042	-2.83304	0.00461083	0.0544004
ENSG00000112118.18	MCM3	3582.7	-0.884835	0.312461	-2.83182	0.00462835	0.0545706
ENSG00000168280.16	KIF5C	88.013	1.73562	0.61296	2.83154	0.00463244	0.0545825
ENSG00000280152.1	AC009078.3	70.8729	1.8552	0.655484	2.83028	0.00465077	0.054762
ENSG00000145506.13	NKD2	161.256	1.21497	0.429446	2.82915	0.00466713	0.054918
ENSG00000148082.9	SHC3	599.161	0.931089	0.329308	2.82741	0.00469256	0.0551805
ENSG00000114200.9	BCHE	4496.54	-0.796332	0.281694	-2.82694	0.00469945	0.0552248
ENSG00000250303.3	AP002884.1	48.1673	2.63429	0.931964	2.8266	0.00470456	0.0552481
ENSG00000163507.13	CIP2A	282.207	-1.16692	0.412964	-2.82573	0.00471734	0.0553614
ENSG00000140534.13	TICRR	197.647	-1.63322	0.578049	-2.8254	0.00472222	0.0553819
ENSG00000140548.9	ZNF710	704.04	-0.895025	0.316837	-2.82488	0.00472987	0.0553981
ENSG00000187955.11	COL14A1	14.965	-3.8269	1.35469	-2.82493	0.00472912	0.0553981
ENSG00000106868.16	SUSD1	1640.11	-0.836811	0.296296	-2.82424	0.00473928	0.0554352
ENSG00000198814.12	GK	163.567	-1.18915	0.421053	-2.82424	0.00473931	0.0554352
ENSG00000183091.19	NEB	9.63224	4.87669	1.72716	2.82353	0.00474985	0.055485
ENSG00000197081.13	IGF2R	10207.5	0.828641	0.293469	2.8236	0.00474871	0.055485
ENSG00000183273.6	CCDC60	17.9678	3.37427	1.19631	2.82057	0.00479384	0.055962
ENSG00000120738.7	EGR1	79.5595	-1.84712	0.655031	-2.8199	0.00480393	0.0560427
ENSG00000166441.12	RPL27A	10124.8	0.939173	0.333154	2.81904	0.00481679	0.0561556
ENSG00000180914.10	OXTR	16.4112	-3.66655	1.30076	-2.81879	0.00482057	0.0561627
ENSG00000123989.13	CHPF	214.421	-5.10196	1.8102	-2.81845	0.00482561	0.0561843
ENSG00000149636.15	DSN1	747.761	-0.919274	0.32623	-2.81787	0.00483435	0.056249
ENSG00000174951.11	FUT1	543.185	-1.00556	0.356881	-2.81764	0.00483773	0.0562513
ENSG00000136404.15	TM6SF1	959.797	-0.828777	0.294169	-2.81735	0.00484221	0.0562664
ENSG00000061337.15	LZTS1	53.6158	-7.25058	2.57389	-2.81697	0.00484791	0.0562956
ENSG00000135842.16	FAM129A	189.132	-1.39552	0.495548	-2.81611	0.00486084	0.0563717
ENSG00000253417.5	LINC02159	53.8848	1.91695	0.680685	2.8162	0.00485951	0.0563717
ENSG00000162409.10	PRKAA2	37.8668	-2.38589	0.847309	-2.81584	0.00486495	0.0563823
ENSG00000205476.8	CCDC85C	356.81	0.972075	0.345336	2.81487	0.00487969	0.0565162
ENSG00000135272.10	MDFIC	869.689	-0.924817	0.328651	-2.81398	0.00489323	0.0566358
ENSG00000050405.13	LIMA1	3497.16	-0.767813	0.272982	-2.81269	0.00491296	0.0568269
ENSG00000144810.15	COL8A1	1035.79	-2.86844	1.02001	-2.81217	0.00492081	0.0568805
ENSG00000132376.19	INPP5K	1482.69	-0.806448	0.286913	-2.81078	0.00494223	0.0570908
ENSG00000162924.14	REL	444.99	0.90596	0.322429	2.8098	0.00495722	0.0572265
ENSG00000152270.8	PDE3B	217.784	-1.25916	0.44834	-2.80848	0.00497754	0.0574236
ENSG00000163293.11	NIPAL1	156.712	-1.77516	0.632164	-2.80806	0.00498404	0.0574612
ENSG00000159147.17	DONSON	624.563	-0.926941	0.330165	-2.80751	0.00499263	0.0575226
ENSG00000254979.5	AP000781.2	30.6931	-2.47596	0.88204	-2.80709	0.00499916	0.0575603
ENSG00000281376.1	ABALON	108.429	1.35221	0.481856	2.80624	0.00501231	0.0576742
ENSG00000170027.6	YWHAG	1115.28	0.853374	0.304364	2.80379	0.00505052	0.0580761
ENSG00000267059.2	AC005943.1	6.26907	-6.04527	2.15632	-2.80351	0.00505493	0.0580889
ENSG00000172667.10	ZMAT3	3801.24	0.810114	0.28905	2.80268	0.00506801	0.0582015
ENSG00000076706.16	MCAM	59389.6	-0.715209	0.255257	-2.80192	0.00507994	0.0583006
ENSG00000075826.16	SEC31B	81.4061	1.61323	0.575936	2.80105	0.00509365	0.0583821
ENSG00000186472.19	PCLO	209.884	1.34358	0.479666	2.80108	0.00509322	0.0583821
ENSG00000172348.14	RCAN2	1451.25	0.797265	0.285128	2.79617	0.00517129	0.0592335
ENSG00000166289.5	PLEKHF1	54.7611	-2.01759	0.721794	-2.79524	0.00518614	0.0593268
ENSG00000203780.10	FANK1	204.522	1.24146	0.444105	2.79541	0.00518339	0.0593268
ENSG00000093072.16	ADA2	333.452	-1.06417	0.38088	-2.79397	0.00520649	0.0594115
ENSG00000101333.16	PLCB4	414.967	1.02979	0.368542	2.79423	0.00520241	0.0594115
ENSG00000151883.17	PARP8	224.867	1.10796	0.396557	2.79394	0.00520696	0.0594115
ENSG00000239264.8	TXNDC5	76380.8	-0.886679	0.317358	-2.79394	0.005207	0.0594115
ENSG00000143390.17	RFX5	1344.73	-0.838316	0.300075	-2.79369	0.00521104	0.0594193
ENSG00000072954.6	TMEM38A	175.93	1.12225	0.401788	2.79314	0.00521998	0.0594828
ENSG00000130032.15	PRRG3	15.8587	-4.09309	1.46562	-2.79274	0.00522634	0.0595169
ENSG00000111859.16	NEDD9	7979.48	0.906609	0.324766	2.79157	0.00524526	0.0596683
ENSG00000152558.14	TMEM123	11186	-0.863801	0.309463	-2.7913	0.00524976	0.0596683
ENSG00000211896.7	IGHG1	259.738	4.49946	1.61191	2.79138	0.00524843	0.0596683
ENSG00000125319.14	C17orf53	131.374	-1.54601	0.554114	-2.79006	0.00526984	0.0598581
ENSG00000163602.10	RYBP	858.437	0.976799	0.350382	2.78781	0.00530658	0.0602367
ENSG00000145864.12	GABRB2	31.9147	2.61003	0.936363	2.78741	0.00531316	0.0602726
ENSG00000214114.8	MYCBP	759.073	-0.8568	0.307419	-2.78707	0.00531863	0.060296
ENSG00000174442.11	ZWILCH	1146.88	-0.792319	0.284428	-2.78566	0.00534188	0.0605207
ENSG00000227051.6	C14orf132	943.833	0.823039	0.295484	2.78539	0.00534637	0.0605328
ENSG00000166848.5	TERF2IP	8112.37	0.748656	0.268866	2.7845	0.00536107	0.0606604
ENSG00000083937.8	CHMP2B	2390.11	0.778465	0.279755	2.78267	0.00539138	0.0609643
ENSG00000160285.14	LSS	12223.9	-0.908216	0.326493	-2.78173	0.00540693	0.061101
ENSG00000136859.9	ANGPTL2	4673.82	-0.827643	0.29766	-2.7805	0.00542752	0.0612945
ENSG00000120306.10	CYSTM1	4335.36	0.881256	0.317131	2.77884	0.00545538	0.0615698
ENSG00000113161.15	HMGCR	10777	-0.989458	0.356141	-2.77828	0.00546479	0.0616081
ENSG00000196923.13	PDLIM7	4183.65	-0.764599	0.275212	-2.77822	0.00546574	0.0616081
ENSG00000144891.17	AGTR1	24.5906	-2.92133	1.05197	-2.777	0.00548637	0.0618012
ENSG00000143753.12	DEGS1	11397.8	-0.780893	0.281227	-2.77673	0.0054908	0.0618117
ENSG00000122986.13	HVCN1	47.5176	-1.89882	0.683925	-2.77636	0.00549719	0.0618442
ENSG00000166396.12	SERPINB7	7.88227	-5.62596	2.02693	-2.7756	0.00550999	0.0619488
ENSG00000164418.20	GRIK2	87.2329	1.50188	0.541331	2.77442	0.00552994	0.0621336
ENSG00000110057.7	UNC93B1	373.679	-0.934511	0.337124	-2.77201	0.00557115	0.0625171
ENSG00000185477.4	GPRIN3	1808.63	0.894199	0.322567	2.77214	0.00556896	0.0625171
ENSG00000239697.10	TNFSF12	153.615	-1.39195	0.502624	-2.76937	0.00561648	0.0629858
ENSG00000158163.14	DZIP1L	75.6546	-1.67492	0.60514	-2.76783	0.00564312	0.0632043
ENSG00000186369.10	LINC00643	8.35614	-5.03013	1.81734	-2.76785	0.00564273	0.0632043
ENSG00000145365.10	TIFA	589.776	0.869897	0.314623	2.76489	0.00569424	0.0637366
ENSG00000075702.17	WDR62	269.833	-1.23779	0.448628	-2.75906	0.00579687	0.0648323
ENSG00000085063.15	CD59	18014.1	-0.735893	0.266753	-2.7587	0.00580314	0.0648323
ENSG00000143515.16	ATP8B2	1262.44	-0.935455	0.339091	-2.75871	0.00580293	0.0648323
ENSG00000172020.12	GAP43	73.9302	1.61891	0.586901	2.7584	0.00580845	0.0648506
ENSG00000126217.20	MCF2L	147.392	-1.38849	0.503599	-2.75713	0.0058311	0.0650624
ENSG00000155926.13	SLA	71.7042	-1.54623	0.561028	-2.75607	0.00585011	0.0652333
ENSG00000117791.15	MARC2	76.7756	-1.85183	0.672719	-2.75275	0.00590972	0.0657775
ENSG00000176788.8	BASP1	5821.25	0.974881	0.354116	2.753	0.00590525	0.0657775
ENSG00000279970.1	AC023024.2	17.2874	-3.30947	1.20225	-2.75273	0.00591008	0.0657775
ENSG00000122966.15	CIT	343.024	-1.07119	0.389197	-2.75232	0.0059175	0.0658187
ENSG00000198286.9	CARD11	6.90765	-5.80542	2.10966	-2.75183	0.00592641	0.0658763
ENSG00000133119.12	RFC3	465.677	-0.968256	0.351926	-2.7513	0.00593587	0.0658986
ENSG00000179409.10	GEMIN4	1578.57	-0.808605	0.293879	-2.75149	0.0059325	0.0658986
ENSG00000157856.11	DRC1	60.0712	1.84729	0.671565	2.75073	0.00594635	0.0659735
ENSG00000154760.13	SLFN13	89.3699	-1.41062	0.51302	-2.74964	0.0059661	0.0661512
ENSG00000185352.8	HS6ST3	34.221	2.68012	0.975557	2.74727	0.0060094	0.0665894
ENSG00000211445.11	GPX3	94.6798	-1.42015	0.517007	-2.74687	0.00601678	0.0666294
ENSG00000095596.11	CYP26A1	10.0225	4.76958	1.73685	2.7461	0.0060308	0.0667011
ENSG00000172380.5	GNG12	6219.77	-0.954494	0.347566	-2.74623	0.00602852	0.0667011
ENSG00000051108.14	HERPUD1	4710.09	-0.717111	0.261191	-2.74554	0.00604111	0.0667734
ENSG00000165424.6	ZCCHC24	1079.34	-0.875276	0.318958	-2.74418	0.00606627	0.0670095
ENSG00000128487.16	SPECC1	492.249	0.887213	0.323341	2.74389	0.00607152	0.0670256
ENSG00000051009.10	FAM160A2	636.25	0.825399	0.30092	2.74292	0.00608957	0.067183
ENSG00000141504.11	SAT2	1118.52	0.982801	0.35839	2.74227	0.00610164	0.0672321
ENSG00000165995.19	CACNB2	19.6852	3.14334	1.14624	2.7423	0.00610113	0.0672321
ENSG00000257663.1	AC025259.1	170.419	1.27439	0.464774	2.74195	0.00610752	0.067255
ENSG00000150672.17	DLG2	27.8552	2.72213	0.992955	2.74144	0.00611705	0.0672761
ENSG00000185480.11	PARPBP	369.128	-1.15443	0.421075	-2.74162	0.00611368	0.0672761
ENSG00000186184.17	POLR1D	1857.3	0.824505	0.300883	2.74028	0.00613861	0.0674713
ENSG00000167081.16	PBX3	580.76	0.8574	0.312965	2.7396	0.00615135	0.0675693
ENSG00000170891.10	CYTL1	374.036	1.23981	0.452616	2.7392	0.00615883	0.0676094
ENSG00000085840.12	ORC1	162.61	-1.14385	0.417638	-2.73886	0.0061652	0.0676374
ENSG00000160190.13	SLC37A1	229.785	-1.03865	0.379421	-2.73746	0.00619156	0.0678844
ENSG00000127124.15	HIVEP3	331.139	-0.978113	0.357379	-2.7369	0.00620206	0.0679574
ENSG00000105854.12	PON2	8301.68	0.737923	0.269747	2.73561	0.0062264	0.0681818
ENSG00000131470.14	PSMC3IP	184.367	-1.12968	0.413319	-2.7332	0.00627225	0.0686414
ENSG00000198768.10	APCDD1L	12.0624	-4.00751	1.46763	-2.73059	0.00632203	0.0691006
ENSG00000213347.10	MXD3	138.769	-1.20654	0.441829	-2.73079	0.00631827	0.0691006
ENSG00000268854.1	AC020909.3	70.1444	1.68456	0.617253	2.72912	0.00635041	0.0693678
ENSG00000125354.22	SEPT6	877.103	-0.84109	0.308219	-2.72887	0.00635513	0.0693765
ENSG00000242498.7	ARPIN	300.679	-0.952755	0.349213	-2.72829	0.00636638	0.0694564
ENSG00000110080.18	ST3GAL4	1387.01	-0.756599	0.277408	-2.72739	0.00638371	0.0695596
ENSG00000205592.14	MUC19	17.1432	3.41886	1.2535	2.72746	0.00638249	0.0695596
ENSG00000108797.11	CNTNAP1	20.1044	-2.85177	1.0457	-2.72713	0.00638887	0.069573
ENSG00000123342.15	MMP19	6.88168	-5.74725	2.10869	-2.72551	0.00642019	0.0698709
ENSG00000070614.14	NDST1	8962.93	-0.816458	0.299665	-2.72457	0.00643851	0.0699405
ENSG00000128805.14	ARHGAP22	171.872	-1.25201	0.459496	-2.72476	0.00643486	0.0699405
ENSG00000138675.16	FGF5	28.4399	-3.35708	1.23216	-2.72455	0.00643898	0.0699405
ENSG00000187553.8	CYP26C1	5.85333	5.99674	2.20115	2.72437	0.00644241	0.0699405
ENSG00000176974.19	SHMT1	563.149	-0.894306	0.328369	-2.72348	0.00645981	0.0700863
ENSG00000099814.15	CEP170B	83.4309	-1.49332	0.548645	-2.72183	0.00649206	0.0703128
ENSG00000139514.12	SLC7A1	1327.17	-0.951056	0.349372	-2.72219	0.0064851	0.0703128
ENSG00000275410.4	HNF1B	19.7153	2.85323	1.04828	2.72181	0.00649262	0.0703128
ENSG00000107562.16	CXCL12	69.3971	1.73718	0.638339	2.7214	0.0065006	0.0703562
ENSG00000244300.2	GATA2-AS1	78.4436	1.7742	0.652118	2.72066	0.00651508	0.0704697
ENSG00000178149.16	DALRD3	577.421	-0.850508	0.312654	-2.72028	0.00652263	0.0705082
ENSG00000133816.15	MICAL2	4722.11	-0.953893	0.350745	-2.71962	0.00653571	0.0706064
ENSG00000172965.15	MIR4435-2HG	5897.37	0.818306	0.301007	2.71856	0.00655673	0.0707903
ENSG00000154102.10	C16orf74	43.8131	-2.31297	0.85094	-2.71814	0.00656508	0.0708371
ENSG00000082781.11	ITGB5	3821.31	-1.02486	0.377143	-2.71744	0.00657881	0.070942
ENSG00000163399.15	ATP1A1	7923.16	0.795733	0.292918	2.71657	0.00659624	0.0710497
ENSG00000178026.12	LRRC75B	97.6961	-1.41381	0.520482	-2.71634	0.00660086	0.0710497
ENSG00000184979.9	USP18	274.766	-1.14049	0.419855	-2.71638	0.0066	0.0710497
ENSG00000160867.14	FGFR4	64.469	-1.70085	0.626252	-2.71591	0.00660929	0.0710971
ENSG00000116641.17	DOCK7	443.632	-1.39636	0.514189	-2.71566	0.00661434	0.0711082
ENSG00000111696.11	NT5DC3	108.699	-1.52294	0.561083	-2.71428	0.00664201	0.0713622
ENSG00000126262.4	FFAR2	7.08887	5.41513	1.99541	2.7138	0.00665172	0.0714231
ENSG00000105486.13	LIG1	1572.71	-0.764603	0.281914	-2.71219	0.00668404	0.0716894
ENSG00000112167.9	SAYSD1	463.764	0.8674	0.319819	2.71216	0.00668463	0.0716894
ENSG00000231749.3	ABCA9-AS1	201.295	1.50737	0.555853	2.71182	0.00669157	0.0717203
ENSG00000119771.14	KLHL29	66.4741	-1.81911	0.671151	-2.71044	0.00671939	0.0719749
ENSG00000134046.11	MBD2	548.162	1.00409	0.370646	2.70901	0.00674834	0.0722412
ENSG00000276386.1	CNTNAP3P2	124.373	1.36597	0.504282	2.70875	0.00675377	0.0722555
ENSG00000119946.10	CNNM1	93.204	1.86983	0.690971	2.70609	0.00680806	0.0727923
ENSG00000157653.11	C9orf43	151.514	1.34679	0.497973	2.70454	0.00683986	0.073047
ENSG00000222041.11	CYTOR	3159.27	0.865888	0.320162	2.70453	0.00684015	0.073047
ENSG00000090661.11	CERS4	73.7277	-1.50384	0.556136	-2.70408	0.00684933	0.0731009
ENSG00000137941.16	TTLL7	575.456	-0.934149	0.34555	-2.70337	0.00686405	0.0732138
ENSG00000136158.11	SPRY2	2195.57	0.806872	0.29851	2.703	0.00687172	0.0732514
ENSG00000168487.18	BMP1	1850.3	-0.814503	0.301571	-2.70087	0.00691587	0.0736776
ENSG00000180815.14	MAP3K15	87.1568	1.54642	0.573211	2.69782	0.00697942	0.074303
ENSG00000186148.13	AC013268.1	18.3874	3.17956	1.17864	2.69765	0.00698298	0.074303
ENSG00000100003.17	SEC14L2	450.427	-0.872688	0.323567	-2.69709	0.00699489	0.0743849
ENSG00000112759.17	SLC29A1	2699.94	-0.817738	0.303242	-2.69665	0.00700409	0.0744379
ENSG00000253368.3	TRNP1	289.947	-1.08447	0.402191	-2.6964	0.00700934	0.0744489
ENSG00000239713.8	APOBEC3G	8.11566	-5.11914	1.8997	-2.6947	0.00704515	0.0747844
ENSG00000102098.17	SCML2	130.313	-1.52759	0.567102	-2.69367	0.00706696	0.0749038
ENSG00000164050.12	PLXNB1	1054.23	0.786478	0.291962	2.69377	0.00706486	0.0749038
ENSG00000234028.3	AC062029.1	43.8609	-1.95534	0.72593	-2.69357	0.00706912	0.0749038
ENSG00000117114.19	ADGRL2	7829.58	-0.899345	0.333944	-2.6931	0.00707914	0.0749232
ENSG00000178882.14	RFLNA	14.1434	-3.29274	1.22266	-2.69309	0.00707942	0.0749232
ENSG00000143434.15	SEMA6C	702.072	0.804514	0.299097	2.68981	0.00714926	0.075617
ENSG00000106366.8	SERPINE1	89568.7	-0.837545	0.311407	-2.68955	0.0071548	0.0756304
ENSG00000103241.6	FOXF1	248.263	1.40214	0.522229	2.68491	0.00725494	0.076643
ENSG00000143125.5	PROK1	6.5551	-5.7291	2.13453	-2.68401	0.00727442	0.0768029
ENSG00000137076.20	TLN1	19924.3	-0.733794	0.273548	-2.68251	0.00730725	0.0771034
ENSG00000148700.14	ADD3	8337.96	-0.761256	0.283857	-2.68183	0.00732204	0.077169
ENSG00000152192.7	POU4F1	10.6055	4.51204	1.68245	2.68182	0.00732219	0.077169
ENSG00000181409.12	AATK	150.858	-1.20228	0.448643	-2.67983	0.00736606	0.077585
ENSG00000135547.8	HEY2	2329.7	-0.964707	0.360152	-2.67861	0.00739286	0.077821
ENSG00000188042.7	ARL4C	802.547	3.27166	1.2218	2.67773	0.0074123	0.0779792
ENSG00000112306.7	RPS12	3555.43	0.892862	0.333481	2.6774	0.00741968	0.0780104
ENSG00000177469.12	CAVIN1	45876.9	-0.707194	0.264187	-2.67687	0.00743134	0.0780865
ENSG00000078114.18	NEBL	62.6133	1.75055	0.654165	2.67601	0.00745035	0.0781242
ENSG00000159131.16	GART	3344.74	-0.839152	0.313593	-2.67593	0.00745231	0.0781242
ENSG00000168237.17	GLYCTK	300.474	-1.04984	0.392316	-2.67602	0.00745032	0.0781242
ENSG00000182132.13	KCNIP1	7.41793	5.59596	2.09123	2.67591	0.00745261	0.0781242
ENSG00000272449.2	AL139246.5	63.1414	-1.83474	0.685937	-2.67479	0.00747754	0.0783391
ENSG00000072778.19	ACADVL	4968.88	-0.742959	0.277822	-2.67423	0.0074902	0.0783788
ENSG00000139618.14	BRCA2	261.217	-1.18263	0.442221	-2.6743	0.00748862	0.0783788
ENSG00000033170.16	FUT8	648.167	-0.807654	0.302095	-2.67351	0.00750618	0.0784996
ENSG00000143799.12	PARP1	5957.76	-0.836797	0.313127	-2.67239	0.00753126	0.0785295
ENSG00000150403.17	TMCO3	3613.92	-0.802841	0.30038	-2.67275	0.00752315	0.0785295
ENSG00000160796.16	NBEAL2	2000.39	-0.743111	0.278059	-2.6725	0.00752889	0.0785295
ENSG00000178585.14	CTNNBIP1	4123.91	0.748678	0.280083	2.67306	0.00751626	0.0785295
ENSG00000259172.1	AC023024.1	49.8117	-2.52607	0.945131	-2.67272	0.007524	0.0785295
ENSG00000138756.17	BMP2K	1246.5	0.765658	0.286559	2.6719	0.00754232	0.0785985
ENSG00000131069.19	ACSS2	1806.24	-0.736685	0.275749	-2.67158	0.0075496	0.078628
ENSG00000142396.10	ERVK3-1	1744.65	0.884377	0.331142	2.67069	0.00756957	0.0787895
ENSG00000170889.13	RPS9	5817.39	0.827225	0.309793	2.67025	0.00757945	0.078817
ENSG00000186815.12	TPCN1	701.857	-1.03117	0.386182	-2.67018	0.00758113	0.078817
ENSG00000103310.10	ZP2	150.504	1.21419	0.454866	2.66934	0.00760007	0.0789674
ENSG00000107485.16	GATA3	4256.72	-0.74891	0.280715	-2.66786	0.00763357	0.0792224
ENSG00000169554.19	ZEB2	2718	-0.896837	0.336154	-2.66793	0.00763201	0.0792224
ENSG00000114346.13	ECT2	797.281	-0.835373	0.313369	-2.66578	0.00768093	0.0796671
ENSG00000104529.17	EEF1D	6372.16	0.802605	0.301156	2.66508	0.00769705	0.0797407
ENSG00000182584.4	ACTL10	12.911	-3.39611	1.27428	-2.66512	0.00769603	0.0797407
ENSG00000116062.14	MSH6	2738.77	-0.811087	0.304461	-2.66401	0.00772144	0.0798695
ENSG00000170323.8	FABP4	833.274	2.91166	1.09292	2.66411	0.00771921	0.0798695
ENSG00000236051.7	MYCBP2-AS1	59.2658	1.68555	0.632729	2.66394	0.00772304	0.0798695
ENSG00000232517.2	AC112198.2	232.559	-1.39991	0.525757	-2.66266	0.00775261	0.0801284
ENSG00000137343.17	ATAT1	253.273	1.01376	0.380882	2.66162	0.00777656	0.080329
ENSG00000103227.18	LMF1	961.514	0.761254	0.286096	2.66084	0.00779471	0.0804694
ENSG00000132563.15	REEP2	134.295	-1.29253	0.485825	-2.66048	0.007803	0.080508
ENSG00000119888.10	EPCAM	18.1721	-3.19847	1.20231	-2.66027	0.00780782	0.0805098
ENSG00000127507.17	ADGRE2	14.6025	-3.50926	1.31923	-2.66008	0.00781229	0.0805098
ENSG00000261373.1	VPS9D1-AS1	9.74133	-4.31074	1.62067	-2.65986	0.00781733	0.0805149
ENSG00000227036.7	LINC00511	10.2757	-4.26963	1.60553	-2.65933	0.00782972	0.0805955
ENSG00000261069.3	AC124312.3	24.5345	3.03791	1.14267	2.65861	0.00784646	0.0807208
ENSG00000215769.8	ARHGAP27P1-BPTFP1-KPNA2P3	44.9368	1.88064	0.707678	2.65748	0.00787266	0.0809432
ENSG00000241343.9	RPL36A	2276.61	0.867087	0.326356	2.65687	0.00788699	0.0810434
ENSG00000092068.19	SLC7A8	10.084	-4.66646	1.75729	-2.65548	0.00791945	0.0813297
ENSG00000169704.4	GP9	121.323	-1.28465	0.483879	-2.6549	0.00793309	0.0814224
ENSG00000068366.19	ACSL4	2392.97	-0.922838	0.347687	-2.65422	0.00794918	0.0815402
ENSG00000196730.12	DAPK1	3623.31	-0.786956	0.296646	-2.65285	0.00798154	0.0817974
ENSG00000243364.7	EFNA4	524.285	0.823837	0.310558	2.65277	0.0079835	0.0817974
ENSG00000076716.8	GPC4	2218.16	1.04778	0.395066	2.65217	0.00799755	0.0818938
ENSG00000096968.13	JAK2	596.547	-1.0002	0.377256	-2.65124	0.00801973	0.0820734
ENSG00000082397.17	EPB41L3	151.957	1.85184	0.698737	2.65026	0.0080429	0.0822444
ENSG00000102034.16	ELF4	1374.98	-0.774719	0.292331	-2.65014	0.00804574	0.0822444
ENSG00000177098.8	SCN4B	8.82284	5.53883	2.09033	2.64974	0.00805546	0.082296
ENSG00000105613.9	MAST1	116.446	-1.22205	0.46139	-2.64863	0.00808178	0.0824696
ENSG00000269893.6	SNHG8	366.305	0.941592	0.355486	2.64874	0.00807918	0.0824696
ENSG00000163406.10	SLC15A2	17.9523	3.39851	1.28333	2.64819	0.00809236	0.0825299
ENSG00000167680.15	SEMA6B	2037.42	0.846666	0.319758	2.64783	0.00810093	0.0825697
ENSG00000169991.10	IFFO2	394.005	0.886661	0.335042	2.64642	0.00813486	0.0828677
ENSG00000125249.6	RAP2A	1332.41	0.742915	0.280894	2.64482	0.00817332	0.0832116
ENSG00000164181.13	ELOVL7	258.468	-1.30071	0.491871	-2.64442	0.00818314	0.0832636
ENSG00000131368.7	MRPS25	1491.2	0.800801	0.302892	2.64385	0.00819697	0.0833563
ENSG00000081842.17	PCDHA6	107.369	-1.28075	0.484542	-2.64321	0.00821236	0.0833689
ENSG00000135052.16	GOLM1	10093	-0.729371	0.275924	-2.64338	0.00820835	0.0833689
ENSG00000189152.10	GRAPL	85.9954	1.40485	0.531435	2.6435	0.00820549	0.0833689
ENSG00000181634.7	TNFSF15	200.693	-1.12854	0.42707	-2.64253	0.00822889	0.0834887
ENSG00000158164.6	TMSB15A	300.889	-0.985493	0.373032	-2.64184	0.0082456	0.0836103
ENSG00000196922.10	ZNF252P	1026.36	-0.753167	0.285235	-2.64052	0.00827793	0.08389
ENSG00000254481.1	PTP4A2P2	8.00871	-4.62583	1.75451	-2.63654	0.00837563	0.0848315
ENSG00000013364.18	MVP	1867.47	-0.798296	0.303082	-2.63393	0.0084404	0.0853999
ENSG00000115687.13	PASK	161.759	-1.476	0.560436	-2.63366	0.00844696	0.0853999
ENSG00000198113.2	TOR4A	1789.59	-0.730321	0.27732	-2.6335	0.00845108	0.0853999
ENSG00000272379.1	AL008729.2	110.77	1.22811	0.466299	2.63373	0.00844518	0.0853999
ENSG00000204954.9	C12orf73	377.442	0.920051	0.349413	2.63313	0.00846008	0.085442
ENSG00000090975.12	PITPNM2	142.319	1.26562	0.480885	2.63185	0.00849215	0.0857169
ENSG00000144815.15	NXPE3	880.899	-0.85015	0.323065	-2.63151	0.00850062	0.0857534
ENSG00000171570.11	RAB4B-EGLN2	45.4298	1.82773	0.694702	2.63096	0.00851452	0.0858447
ENSG00000256061.7	DNAAF4	103.99	1.27291	0.484291	2.6284	0.00857871	0.0864425
ENSG00000175220.11	ARHGAP1	4117.86	-0.717822	0.273197	-2.62748	0.00860187	0.0866265
ENSG00000223802.7	CERS1	740.167	0.95537	0.363691	2.62687	0.00861742	0.0867337
ENSG00000118513.18	MYB	31.9865	-2.26543	0.862473	-2.62667	0.00862243	0.0867347
ENSG00000145425.9	RPS3A	15901.7	0.761843	0.29012	2.62596	0.00864042	0.0868662
ENSG00000166946.13	CCNDBP1	2149.86	-0.708772	0.269971	-2.62536	0.00865565	0.0869699
ENSG00000115159.15	GPD2	813.183	-1.03923	0.39601	-2.62426	0.00868383	0.0872034
ENSG00000144824.20	PHLDB2	3112.24	-0.897786	0.342209	-2.6235	0.00870303	0.087297
ENSG00000177084.16	POLE	1002.52	-0.95649	0.364569	-2.62362	0.00870016	0.087297
ENSG00000064601.18	CTSA	12360.2	0.697311	0.265921	2.62225	0.00873516	0.0875696
ENSG00000069493.14	CLEC2D	67.7179	1.51131	0.576484	2.6216	0.00875174	0.0876861
ENSG00000162542.13	TMCO4	58.2721	-1.62184	0.618757	-2.62113	0.00876394	0.0877586
ENSG00000029534.20	ANK1	34.1259	2.10429	0.803331	2.61945	0.0088071	0.0878452
ENSG00000060138.12	YBX3	14257.8	-0.66937	0.255528	-2.61956	0.00880433	0.0878452
ENSG00000141867.17	BRD4	1567.63	0.746606	0.284971	2.61994	0.00879446	0.0878452
ENSG00000149308.16	NPAT	902.488	-0.835173	0.318812	-2.61964	0.00880214	0.0878452
ENSG00000156103.15	MMP16	1569.24	-0.953346	0.363965	-2.61934	0.00881012	0.0878452
ENSG00000171962.17	DRC3	20.4861	2.5385	0.968944	2.61986	0.00879662	0.0878452
ENSG00000172469.15	MANEA	1034.39	-0.924138	0.352825	-2.61925	0.00881235	0.0878452
ENSG00000244491.1	AL021707.5	10.7753	5.07396	1.9366	2.62003	0.00879225	0.0878452
ENSG00000129675.15	ARHGEF6	899.999	-0.86487	0.330746	-2.61491	0.00892506	0.0889185
ENSG00000136235.16	GPNMB	9.85051	-4.37649	1.67493	-2.61294	0.00897667	0.0893823
ENSG00000160050.14	CCDC28B	541.961	-0.839445	0.321314	-2.61254	0.00898726	0.0894374
ENSG00000124225.15	PMEPA1	1867.44	0.841213	0.322064	2.61194	0.00900292	0.0895428
ENSG00000219200.11	RNASEK	9205.5	0.819075	0.313799	2.61019	0.0090491	0.0899515
ENSG00000079335.19	CDC14A	336.18	-0.904126	0.346507	-2.60926	0.00907385	0.0901013
ENSG00000147604.13	RPL7	19483.3	0.743039	0.284772	2.60924	0.00907436	0.0901013
ENSG00000180596.7	HIST1H2BC	68.1783	1.5745	0.603635	2.60837	0.00909738	0.0902791
ENSG00000164591.13	MYOZ3	93.8011	-1.36001	0.521462	-2.60808	0.00910519	0.0903059
ENSG00000228315.11	GUSBP11	74.4225	1.44175	0.553192	2.60623	0.00915444	0.0907435
ENSG00000164880.15	INTS1	3592.19	-0.813237	0.312067	-2.60597	0.00916152	0.0907627
ENSG00000108306.12	FBXL20	739.684	-0.77276	0.29664	-2.60505	0.00918614	0.0909557
ENSG00000008394.12	MGST1	324.736	-1.18565	0.455209	-2.60462	0.00919758	0.0910179
ENSG00000080031.9	PTPRH	8.50294	-5.53497	2.12625	-2.60316	0.00923695	0.0913564
ENSG00000107742.12	SPOCK2	9.98904	4.34063	1.66808	2.60218	0.00926344	0.091516
ENSG00000130164.13	LDLR	13746.9	-0.947635	0.364158	-2.60226	0.00926108	0.091516
ENSG00000117266.15	CDK18	10.9321	-4.03613	1.5512	-2.60195	0.00926964	0.091526
ENSG00000183048.11	SLC25A10	478.073	-0.909878	0.349791	-2.6012	0.00928978	0.0916225
ENSG00000281887.3	GIMAP1-GIMAP5	342.088	1.13864	0.437707	2.60137	0.00928531	0.0916225
ENSG00000130208.9	APOC1	23.1679	-2.42687	0.933223	-2.60053	0.00930797	0.0917508
ENSG00000117523.16	PRRC2C	3907.37	0.744563	0.28646	2.59919	0.00934453	0.0920598
ENSG00000090581.9	GNPTG	3871.15	0.73963	0.284701	2.59792	0.00937894	0.0923473
ENSG00000180573.9	HIST1H2AC	398.896	0.997297	0.384044	2.59683	0.00940886	0.0925903
ENSG00000115226.9	FNDC4	475.007	-1.00924	0.388869	-2.59532	0.00945021	0.0929455
ENSG00000141576.15	RNF157	74.5846	2.29658	0.884989	2.59504	0.00945802	0.0929706
ENSG00000165434.7	PGM2L1	2383.05	0.730867	0.281781	2.59374	0.00949376	0.09327
ENSG00000139874.5	SSTR1	7995.82	-1.15345	0.444989	-2.5921	0.00953933	0.0936657
ENSG00000167460.15	TPM4	42160.7	-0.66983	0.258465	-2.59157	0.00955386	0.0937562
ENSG00000131669.9	NINJ1	2736.88	0.819992	0.316551	2.5904	0.00958653	0.0939204
ENSG00000141696.12	P3H4	6673.32	-0.706734	0.272823	-2.59045	0.00958512	0.0939204
ENSG00000166165.12	CKB	567.711	1.04021	0.401534	2.5906	0.00958098	0.0939204
ENSG00000251349.3	MSANTD3-TMEFF1	1038.79	0.76382	0.295118	2.58818	0.00964834	0.0944736
ENSG00000154265.15	ABCA5	295.846	0.99926	0.386121	2.58795	0.00965499	0.0944863
ENSG00000180035.12	ZNF48	1033.88	0.746388	0.288486	2.58726	0.00967414	0.0946213
ENSG00000146232.16	NFKBIE	1447.82	0.771354	0.298196	2.58673	0.00968904	0.0946623
ENSG00000174327.6	SLC16A13	218.433	-1.0155	0.392573	-2.58678	0.00968763	0.0946623
ENSG00000185158.12	LRRC37B	266.92	0.971974	0.375899	2.58573	0.00971734	0.0948863
ENSG00000169203.16	NPIPB12	188.732	1.19409	0.462161	2.58372	0.00977409	0.0953878
ENSG00000136531.15	SCN2A	27.7707	2.2823	0.883899	2.58209	0.0098205	0.0957158
ENSG00000197971.14	MBP	55.415	1.96749	0.762014	2.58197	0.00982395	0.0957158
ENSG00000216775.3	AL109918.1	238.854	-1.04395	0.404308	-2.58206	0.00982131	0.0957158
ENSG00000095574.11	IKZF5	681.355	-0.825424	0.31986	-2.58058	0.0098635	0.0960482
ENSG00000172318.5	B3GALT1	147.644	1.13577	0.440385	2.57903	0.00990782	0.0964267
ENSG00000109099.14	PMP22	6356.65	0.789928	0.306415	2.57796	0.00993841	0.0966712
ENSG00000176170.13	SPHK1	517.064	-1.22275	0.474359	-2.57768	0.00994651	0.0966968
ENSG00000254772.9	EEF1G	25135.3	0.73586	0.2855	2.57744	0.00995349	0.0967114
ENSG00000149177.12	PTPRJ	8.58378	-4.82076	1.8709	-2.57671	0.00997459	0.0968631
ENSG00000112033.13	PPARD	864.893	0.840645	0.326299	2.5763	0.00998627	0.0969031
ENSG00000244968.6	LIFR-AS1	70.3126	-1.50379	0.583729	-2.57619	0.00998967	0.0969031
ENSG00000151575.14	TEX9	451.71	0.857805	0.333167	2.5747	0.0100328	0.0972676
ENSG00000178971.14	CTC1	754.061	-0.834739	0.324346	-2.57361	0.0100643	0.0974669
ENSG00000183696.13	UPP1	1585.24	0.942993	0.366382	2.57379	0.010059	0.0974669
ENSG00000084710.13	EFR3B	833.222	0.909296	0.353347	2.57338	0.0100711	0.0974788
ENSG00000144161.12	ZC3H8	261.568	1.02064	0.396647	2.57317	0.010077	0.0974831
ENSG00000259066.5	AL110118.2	28.8139	-2.65594	1.03236	-2.5727	0.010091	0.0975644
ENSG00000144655.14	CSRNP1	2011.93	-0.813416	0.316233	-2.57221	0.0101052	0.0976169
ENSG00000275216.2	AL161431.1	16.444	-2.80358	1.08998	-2.57213	0.0101074	0.0976169
ENSG00000178921.13	PFAS	2012.81	-0.9638	0.374796	-2.57153	0.0101249	0.0976788
ENSG00000179364.13	PACS2	1819.69	0.785675	0.305518	2.57161	0.0101226	0.0976788
ENSG00000105372.7	RPS19	25281.7	0.846638	0.329295	2.57107	0.0101386	0.0977577
ENSG00000178175.11	ZNF366	923.764	0.870392	0.338589	2.57064	0.0101511	0.0978246
ENSG00000140284.10	SLC27A2	78.9764	-1.7199	0.669136	-2.57033	0.0101601	0.0978582
ENSG00000136492.8	BRIP1	224.442	-1.6923	0.658576	-2.56964	0.0101804	0.098
ENSG00000169184.5	MN1	117.471	-1.22569	0.477057	-2.56927	0.0101912	0.0980506
ENSG00000156313.13	RPGR	329.442	-0.918321	0.357493	-2.56878	0.0102058	0.0981377
ENSG00000020577.13	SAMD4A	457.178	0.907376	0.353312	2.5682	0.0102228	0.0982477
ENSG00000165091.16	TMC1	7.54313	5.17125	2.01403	2.56761	0.0102402	0.0983611
ENSG00000003436.15	TFPI	40552.3	-0.831536	0.324009	-2.56639	0.0102762	0.0986111
ENSG00000164604.12	GPR85	199.347	-1.01522	0.395589	-2.56636	0.0102773	0.0986111
ENSG00000167670.15	CHAF1A	669.077	-0.864365	0.336877	-2.56582	0.0102933	0.0987106
ENSG00000197111.15	PCBP2	2863.58	0.813225	0.317113	2.56446	0.0103336	0.0990436
ENSG00000175390.13	EIF3F	4869.18	0.682535	0.266181	2.56417	0.0103422	0.0990718
ENSG00000280744.1	LINC01173	6.00228	5.66286	2.20941	2.56307	0.0103752	0.0993346
ENSG00000121749.15	TBC1D15	920.19	-0.752197	0.293558	-2.56234	0.0103968	0.0994876
ENSG00000110651.11	CD81	7977.36	0.787389	0.307412	2.56135	0.0104266	0.0997187
ENSG00000130270.16	ATP8B3	11.1945	-3.90964	1.52681	-2.56065	0.0104476	0.0998653
ENSG00000170915.8	PAQR8	1077.82	-0.969796	0.378777	-2.56034	0.010457	0.0999012
ENSG00000168496.3	FEN1	1684.97	-0.758682	0.296754	-2.5566	0.0105699	0.100871
ENSG00000277893.1	SRD5A2	5.41351	5.80272	2.26963	2.55668	0.0105677	0.100871
ENSG00000136982.5	DSCC1	219.935	-0.994859	0.389235	-2.55593	0.0105903	0.101011
ENSG00000225178.5	RPSAP58	26.1095	2.31885	0.908137	2.55342	0.0106672	0.101689
ENSG00000137198.9	GMPR	570.301	-0.881866	0.345452	-2.55279	0.0106864	0.101764
ENSG00000164610.8	RP9	633.956	0.949216	0.371835	2.55279	0.0106865	0.101764
ENSG00000174485.15	DENND4A	742.168	-0.813995	0.318944	-2.55216	0.0107058	0.101893
ENSG00000132481.6	TRIM47	2073.43	-0.760446	0.298026	-2.55161	0.0107228	0.101999
ENSG00000165804.15	ZNF219	222.695	0.972143	0.381043	2.55127	0.0107332	0.102043
ENSG00000089199.9	CHGB	39.815	1.93639	0.759695	2.54891	0.0108061	0.102626
ENSG00000220842.6	RPL21P16	3523.5	0.842032	0.330328	2.54908	0.0108008	0.102626
ENSG00000121621.6	KIF18A	199	-1.09322	0.429021	-2.54818	0.0108287	0.102786
ENSG00000116663.10	FBXO6	71.9203	-1.53838	0.604288	-2.54578	0.0109035	0.10344
ENSG00000244398.1	AC116533.1	406.737	0.954315	0.375287	2.54289	0.0109939	0.104242
ENSG00000225151.10	GOLGA2P7	296.121	0.951773	0.374317	2.54269	0.0110002	0.104245
ENSG00000185033.14	SEMA4B	239.273	-1.0364	0.407674	-2.54224	0.0110146	0.10427
ENSG00000242288.9	AC022400.3	11.7219	-4.40721	1.73359	-2.54225	0.0110141	0.10427
ENSG00000128408.8	RIBC2	13.0916	-3.67012	1.44389	-2.54182	0.0110277	0.104338
ENSG00000255112.2	CHMP1B	2630.58	-0.684923	0.269605	-2.54047	0.0110703	0.104685
ENSG00000198171.12	DDRGK1	2055.82	0.794479	0.312782	2.54004	0.0110839	0.104758
ENSG00000166710.18	B2M	60047.2	0.72785	0.28682	2.53766	0.0111598	0.105419
ENSG00000137033.11	IL33	877.229	-3.7578	1.48126	-2.5369	0.011184	0.105535
ENSG00000197635.9	DPP4	143.296	-1.24852	0.492129	-2.53698	0.0111814	0.105535
ENSG00000101194.17	SLC17A9	43.9767	-1.93853	0.764509	-2.53565	0.0112239	0.105854
ENSG00000140945.16	CDH13	2252.43	-0.945093	0.372761	-2.53538	0.0112324	0.105878
ENSG00000230596.3	GPAA1P2	62.4458	1.95863	0.772835	2.53435	0.0112657	0.106136
ENSG00000237732.9	AC010980.1	7.00342	4.9136	1.93925	2.53377	0.0112843	0.106254
ENSG00000179818.13	PCBP1-AS1	324.538	0.895768	0.353659	2.53286	0.0113136	0.106473
ENSG00000112655.15	PTK7	4077.29	-0.891753	0.352216	-2.53183	0.0113468	0.106729
ENSG00000102384.13	CENPI	131.679	-1.1689	0.461762	-2.53138	0.0113614	0.10681
ENSG00000228526.7	MIR34AHG	82.5929	1.4884	0.588242	2.53025	0.0113981	0.107097
ENSG00000111052.7	LIN7A	145.083	1.67511	0.662168	2.52974	0.0114147	0.107196
ENSG00000130830.14	MPP1	1879.27	0.711078	0.281138	2.52929	0.0114295	0.107278
ENSG00000099308.10	MAST3	121.124	1.13988	0.450982	2.52755	0.011486	0.107752
ENSG00000034971.16	MYOC	21.3475	2.70761	1.07161	2.52666	0.0115151	0.107967
ENSG00000140943.16	MBTPS1	9222.4	-0.825352	0.326688	-2.52642	0.011523	0.107984
ENSG00000100934.14	SEC23A	10977.6	-0.886644	0.350982	-2.52618	0.011531	0.108001
ENSG00000260482.3	AC008870.1	6.57721	5.43819	2.15366	2.52509	0.0115668	0.108279
ENSG00000124104.18	SNX21	366.519	-0.864132	0.342347	-2.52414	0.0115981	0.108515
ENSG00000091129.19	NRCAM	23.2086	2.6144	1.03593	2.52373	0.0116117	0.108527
ENSG00000167515.10	TRAPPC2L	2084.66	0.82232	0.325816	2.52388	0.0116068	0.108527
ENSG00000272578.5	AP000347.1	50.0297	1.87989	0.745141	2.52286	0.0116403	0.108737
ENSG00000105559.11	PLEKHA4	9.30493	-4.40124	1.74506	-2.52212	0.0116651	0.108867
ENSG00000173207.12	CKS1B	1050.77	-0.735447	0.291604	-2.52207	0.0116665	0.108867
ENSG00000108107.14	RPL28	2255.16	0.871457	0.345605	2.52154	0.0116842	0.108975
ENSG00000166451.13	CENPN	582.281	-0.780802	0.309866	-2.51981	0.011742	0.109456
ENSG00000169682.17	SPNS1	6322.69	0.667546	0.265252	2.51664	0.0118479	0.110384
ENSG00000103187.7	COTL1	20767.9	0.656809	0.261069	2.51584	0.0118748	0.110482
ENSG00000113441.15	LNPEP	1031.42	-0.731949	0.290944	-2.51577	0.0118771	0.110482
ENSG00000167434.9	CA4	54.1643	1.85621	0.737759	2.51601	0.0118692	0.110482
ENSG00000138376.10	BARD1	431.589	-1.08332	0.430892	-2.51412	0.0119328	0.110942
ENSG00000153029.14	MR1	10.2206	3.90944	1.55598	2.51252	0.0119871	0.111388
ENSG00000161996.18	WDR90	222.452	-1.01348	0.403431	-2.51214	0.012	0.111391
ENSG00000170581.13	STAT2	1495.45	-0.755523	0.300747	-2.51215	0.0119996	0.111391
ENSG00000146205.13	ANO7	112.053	-1.24191	0.494494	-2.51148	0.0120225	0.111541
ENSG00000170485.16	NPAS2	660.006	0.782465	0.311656	2.51067	0.0120503	0.11174
ENSG00000265298.1	AC132812.1	41.48	1.74472	0.695288	2.50935	0.0120954	0.1121
ENSG00000132003.9	ZSWIM4	650.592	-0.88297	0.351907	-2.5091	0.0121038	0.112119
ENSG00000166965.12	RCCD1	170.928	-1.20409	0.479945	-2.50881	0.0121138	0.112153
ENSG00000163535.17	SGO2	426.012	-0.896001	0.357179	-2.50855	0.0121228	0.112177
ENSG00000196169.14	KIF19	10.661	-4.40199	1.75494	-2.50834	0.0121301	0.112186
ENSG00000108984.14	MAP2K6	1221.96	0.711418	0.283726	2.50741	0.0121618	0.11242
ENSG00000089280.18	FUS	4592.05	-0.775281	0.30941	-2.50567	0.0122219	0.11274
ENSG00000135905.19	DOCK10	1007.46	-1.0223	0.407925	-2.50609	0.0122074	0.11274
ENSG00000152767.16	FARP1	4712.61	0.655978	0.261787	2.50577	0.0122186	0.11274
ENSG00000278916.1	CEP83-DT	20.4527	-2.92113	1.16573	-2.50583	0.0122166	0.11274
ENSG00000108947.4	EFNB3	147.816	-1.36166	0.543571	-2.50502	0.0122445	0.11289
ENSG00000257184.3	AC004080.3	6.33702	5.14193	2.05282	2.50481	0.0122517	0.112897
ENSG00000125730.16	C3	17.42	-3.18176	1.27048	-2.50437	0.0122668	0.112977
ENSG00000111199.10	TRPV4	27.2066	-2.55223	1.01955	-2.5033	0.012304	0.113202
ENSG00000174446.12	SNAPC5	243.2	-0.96035	0.383615	-2.50342	0.0122999	0.113202
ENSG00000188985.6	DHFRP1	81.4391	-1.39643	0.558009	-2.50253	0.0123311	0.113392
ENSG00000243137.7	PSG4	7.86512	-4.78236	1.9112	-2.50228	0.0123395	0.11341
ENSG00000181649.6	PHLDA2	1679.26	-1.03887	0.415209	-2.50204	0.0123479	0.113429
ENSG00000124749.16	COL21A1	6.4889	5.00153	1.99984	2.50096	0.0123856	0.113716
ENSG00000171056.7	SOX7	5033.6	0.739542	0.295751	2.50056	0.0123999	0.113788
ENSG00000103888.16	CEMIP	41.6644	-2.33885	0.935492	-2.50013	0.0124148	0.113807
ENSG00000203805.10	PLPP4	26.5513	-2.43721	0.97482	-2.50017	0.0124135	0.113807
ENSG00000162909.17	CAPN2	21714.8	-0.651851	0.260776	-2.49966	0.0124313	0.113899
ENSG00000120875.8	DUSP4	1445.07	0.8677	0.34727	2.49864	0.0124673	0.114169
ENSG00000240891.7	PLCXD2	91.3734	1.32672	0.531037	2.49836	0.012477	0.114199
ENSG00000144749.13	LRIG1	4196.1	-0.937425	0.375259	-2.49808	0.0124869	0.114224
ENSG00000196139.13	AKR1C3	132.862	1.20223	0.481294	2.49791	0.0124927	0.114224
ENSG00000283103.1	AC010642.2	357.156	1.0748	0.430489	2.49669	0.0125357	0.114559
ENSG00000134762.16	DSC3	45.6255	-2.18759	0.876262	-2.4965	0.0125426	0.114562
ENSG00000135414.9	GDF11	158.126	1.25041	0.501029	2.49568	0.0125716	0.114768
ENSG00000021355.12	SERPINB1	1034.76	-0.818751	0.328233	-2.49442	0.0126162	0.11486
ENSG00000158856.18	DMTN	371.988	0.831072	0.333074	2.49515	0.0125902	0.11486
ENSG00000160360.12	GPSM1	756.26	-0.74398	0.298273	-2.4943	0.0126207	0.11486
ENSG00000164946.19	FREM1	135.602	1.35455	0.543018	2.49449	0.0126138	0.11486
ENSG00000172650.13	AGAP5	13.8496	3.55693	1.42598	2.49438	0.0126178	0.11486
ENSG00000285437.1	POLR2J3	563.286	0.829734	0.332651	2.49431	0.0126203	0.11486
ENSG00000165996.13	HACD1	373.489	-0.837186	0.335691	-2.49392	0.0126342	0.114865
ENSG00000215788.10	TNFRSF25	258.385	1.01922	0.408673	2.49398	0.0126319	0.114865
ENSG00000166086.12	JAM3	24405.5	-0.75781	0.303891	-2.49369	0.0126423	0.114879
ENSG00000126010.5	GRPR	53.8693	1.77	0.709963	2.49309	0.0126638	0.114996
ENSG00000167617.2	CDC42EP5	1289.66	0.835985	0.335338	2.49296	0.0126682	0.114996
ENSG00000175040.5	CHST2	2692.07	0.711095	0.285331	2.49217	0.0126964	0.115193
ENSG00000156535.14	CD109	1070.5	0.747163	0.299889	2.49146	0.0127219	0.115365
ENSG00000186051.6	TAL2	19.0183	2.55573	1.02619	2.49052	0.0127557	0.115613
ENSG00000175224.16	ATG13	2130.65	-0.681956	0.273861	-2.49015	0.0127689	0.115673
ENSG00000112394.16	SLC16A10	60.3799	1.88424	0.756894	2.48944	0.0127945	0.115726
ENSG00000117115.12	PADI2	9.85201	-4.43765	1.78244	-2.48965	0.012787	0.115726
ENSG00000196810.4	CTBP1-DT	497.651	-0.833986	0.335008	-2.48945	0.0127942	0.115726
ENSG00000101670.11	LIPG	6479.34	-0.813906	0.327302	-2.48671	0.0128929	0.116557
ENSG00000162849.15	KIF26B	97.6388	1.30849	0.526285	2.48628	0.0129088	0.116641
ENSG00000133636.10	NTS	6.73861	5.07094	2.04068	2.48493	0.0129576	0.117023
ENSG00000083444.16	PLOD1	40270.9	-0.682536	0.274779	-2.48394	0.0129936	0.117168
ENSG00000149218.4	ENDOD1	1600.67	-0.872634	0.351283	-2.48414	0.0129866	0.117168
ENSG00000151651.15	ADAM8	9.07778	4.44367	1.78896	2.48395	0.0129936	0.117168
ENSG00000111817.17	DSE	292.423	-0.876682	0.353095	-2.48285	0.0130336	0.117468
ENSG00000037965.5	HOXC8	8.3954	-4.94558	1.99277	-2.48176	0.0130737	0.11777
ENSG00000113742.12	CPEB4	348.983	0.871099	0.351268	2.47987	0.0131429	0.118333
ENSG00000114450.9	GNB4	1411.48	-0.693721	0.279762	-2.47968	0.01315	0.118337
ENSG00000163735.6	CXCL5	607.031	0.899852	0.362942	2.47933	0.0131631	0.118394
ENSG00000175471.19	MCTP1	2471.11	0.976402	0.393884	2.47891	0.0131785	0.118472
ENSG00000165516.10	KLHDC2	1302.05	-0.692287	0.279369	-2.47804	0.0132106	0.1187
ENSG00000095319.14	NUP188	3783.25	-0.941628	0.380177	-2.47681	0.0132561	0.118963
ENSG00000150551.10	LYPD1	173.954	1.26935	0.512509	2.47673	0.0132591	0.118963
ENSG00000177954.12	RPS27	4063.35	0.810893	0.327407	2.47671	0.01326	0.118963
ENSG00000122026.10	RPL21	7866.14	0.789196	0.31874	2.47598	0.013287	0.119145
ENSG00000152749.7	GPR180	1150.84	-0.769434	0.31084	-2.47533	0.0133111	0.119301
ENSG00000169026.12	SLC49A3	116.214	-1.40707	0.568605	-2.4746	0.0133386	0.119486
ENSG00000198355.4	PIM3	7775.14	0.733792	0.29677	2.4726	0.0134136	0.120097
ENSG00000106443.16	PHF14	1046.64	0.733197	0.296664	2.47147	0.0134559	0.120402
ENSG00000166825.13	ANPEP	155.076	-1.54147	0.623815	-2.47103	0.0134723	0.120402
ENSG00000197261.11	C6orf141	21.0347	2.54752	1.03098	2.47097	0.0134748	0.120402
ENSG00000279191.1	AC068491.4	38.3662	1.98015	0.801312	2.47114	0.0134684	0.120402
ENSG00000270157.1	AC004918.3	79.1339	1.34286	0.543511	2.47071	0.0134844	0.120426
ENSG00000224982.3	TMEM233	181.023	1.46302	0.5922	2.47049	0.0134927	0.12044
ENSG00000163346.16	PBXIP1	4433.3	-0.692222	0.280245	-2.47006	0.013509	0.120524
ENSG00000197386.12	HTT	1334.04	0.747623	0.302976	2.4676	0.0136023	0.121295
ENSG00000089876.11	DHX32	5014.12	0.665214	0.269697	2.46652	0.0136433	0.121599
ENSG00000125648.14	SLC25A23	2246.12	-0.749146	0.303916	-2.46498	0.0137022	0.122016
ENSG00000139112.10	GABARAPL1	1482.25	-0.71808	0.291318	-2.46493	0.0137039	0.122016
ENSG00000125457.14	MIF4GD	699.28	-0.734172	0.297942	-2.46414	0.0137342	0.122225
ENSG00000104369.4	JPH1	559.212	-0.890902	0.361633	-2.46355	0.0137569	0.122242
ENSG00000147573.16	TRIM55	7.8799	-5.34938	2.17132	-2.46366	0.0137527	0.122242
ENSG00000149201.9	CCDC81	25.6612	-2.50469	1.01668	-2.46359	0.0137553	0.122242
ENSG00000233927.4	RPS28	3614.96	0.900298	0.36549	2.46327	0.0137678	0.122277
ENSG00000070882.12	OSBPL3	1206.94	-0.724721	0.294339	-2.4622	0.0138087	0.122517
ENSG00000250151.9	ARPC4-TTLL3	76.2633	1.36437	0.554089	2.46236	0.0138024	0.122517
ENSG00000108551.4	RASD1	66.5218	1.50593	0.611724	2.46178	0.013825	0.122601
ENSG00000105825.12	TFPI2	8929.93	-0.707188	0.287401	-2.46063	0.0138692	0.12283
ENSG00000117020.16	AKT3	912.267	0.707208	0.287417	2.46057	0.0138717	0.12283
ENSG00000262526.2	AC120057.2	227.032	1.02792	0.417699	2.4609	0.0138589	0.12283
ENSG00000224081.8	SLC44A3-AS1	8.9141	4.43819	1.80415	2.45999	0.0138943	0.122968
ENSG00000160949.16	TONSL	349.335	-1.01663	0.413334	-2.45957	0.0139103	0.123048
ENSG00000115275.12	MOGS	5384.93	-0.658513	0.267796	-2.45901	0.0139323	0.123181
[truncated: 56,722 more rows]

## Sheet: (C) p3DMSO_p1DMSO
gene		baseMean	log2FoldChange	lfcSE	stat	pvalue	padj
ENSG00000175445.15	LPL	14371	-8.71656	0.228394	-38.1645	0	0
ENSG00000125968.8	ID1	6669.26	-7.38	0.307003	-24.0388	1.09278e-127	9.54546e-124
ENSG00000152154.10	TMEM178A	1876.63	6.60068	0.308788	21.3761	2.23004e-101	1.29863e-97
ENSG00000119630.13	PGF	17032.7	6.14321	0.292162	21.0267	3.73396e-98	1.63081e-94
ENSG00000166292.11	TMEM100	8273.46	-5.56845	0.276658	-20.1276	4.2317e-90	1.47856e-86
ENSG00000147852.15	VLDLR	5410.29	4.42549	0.236005	18.7517	1.87611e-78	5.46261e-75
ENSG00000134323.11	MYCN	1793.37	-6.25041	0.357866	-17.4658	2.61034e-68	6.51465e-65
ENSG00000154027.18	AK5	975.475	4.15887	0.238695	17.4233	5.48912e-68	1.19869e-64
ENSG00000260314.2	MRC1	613.494	-6.45648	0.383287	-16.8451	1.14058e-63	2.21399e-60
ENSG00000136153.19	LMO7	1593.97	4.00666	0.242996	16.4886	4.43193e-61	7.74259e-58
ENSG00000168528.11	SERINC2	838.27	4.15948	0.252512	16.4724	5.79026e-61	9.19599e-58
ENSG00000140479.16	PCSK6	606.335	5.39736	0.330589	16.3265	6.39402e-60	9.30862e-57
ENSG00000127533.3	F2RL3	626.614	4.41369	0.27161	16.2501	2.22901e-59	2.99545e-56
ENSG00000140511.11	HAPLN3	2430.89	-4.87121	0.30357	-16.0464	6.05433e-58	7.55495e-55
ENSG00000179399.14	GPC5	575.828	6.34679	0.396707	15.9987	1.30469e-57	1.51953e-54
ENSG00000165959.11	CLMN	883.949	4.61607	0.288677	15.9904	1.49007e-57	1.62697e-54
ENSG00000112297.14	CRYBG1	4124.83	4.1679	0.26144	15.9421	3.23492e-57	3.32436e-54
ENSG00000128833.12	MYO5C	824.507	6.30989	0.397413	15.8774	9.08094e-57	8.81356e-54
ENSG00000105974.11	CAV1	15233.6	3.82761	0.248668	15.3925	1.83917e-53	1.69107e-50
ENSG00000280623.1	PCAT14	1717.77	-10.9952	0.715944	-15.3576	3.14965e-53	2.75122e-50
ENSG00000059804.15	SLC2A3	23202.8	-3.57322	0.233169	-15.3246	5.23737e-53	4.35699e-50
ENSG00000149131.15	SERPING1	5864.97	-4.73153	0.31324	-15.1051	1.49817e-51	1.18968e-48
ENSG00000076554.15	TPD52	629.067	4.17687	0.279492	14.9445	1.69174e-50	1.28499e-47
ENSG00000146376.10	ARHGAP18	2395.91	3.02539	0.203187	14.8897	3.84648e-50	2.79992e-47
ENSG00000221968.8	FADS3	3528.64	4.07408	0.273978	14.8701	5.15284e-50	3.6008e-47
ENSG00000070526.14	ST6GALNAC1	746.506	4.67312	0.315783	14.7985	1.49754e-49	1.00623e-46
ENSG00000115353.10	TACR1	2599.44	-3.58741	0.243993	-14.7029	6.17359e-49	3.99454e-46
ENSG00000180287.16	PLD5	537.854	7.75272	0.534278	14.5107	1.03731e-47	6.47206e-45
ENSG00000175264.7	CHST1	7029.03	4.99071	0.345335	14.4518	2.44188e-47	1.47102e-44
ENSG00000107779.13	BMPR1A	751.456	-4.95465	0.343147	-14.4388	2.94773e-47	1.71656e-44
ENSG00000107984.9	DKK1	8943.29	-4.03863	0.280428	-14.4017	5.05098e-47	2.84647e-44
ENSG00000172602.10	RND1	1149.64	-3.90385	0.271874	-14.3591	9.34985e-47	5.10444e-44
ENSG00000164619.9	BMPER	4047.85	-4.12011	0.290535	-14.1811	1.19883e-45	6.34653e-43
ENSG00000163453.11	IGFBP7	2043.76	4.29526	0.303478	14.1535	1.77802e-45	9.13589e-43
ENSG00000115604.10	IL18R1	1642.96	-3.47169	0.245445	-14.1445	2.01977e-45	1.00815e-42
ENSG00000137834.14	SMAD6	5235.89	-4.48132	0.317046	-14.1346	2.32386e-45	1.12772e-42
ENSG00000036565.14	SLC18A1	410.789	-6.16762	0.437857	-14.0859	4.63467e-45	2.18832e-42
ENSG00000162894.11	FCMR	473.617	6.81508	0.486782	14.0003	1.55288e-44	7.13918e-42
ENSG00000164176.12	EDIL3	6216.94	-2.98167	0.217977	-13.6788	1.35885e-42	6.08694e-40
ENSG00000159251.7	ACTC1	410.828	-8.383	0.619244	-13.5375	9.39757e-42	4.10439e-39
ENSG00000091879.13	ANGPT2	9140.45	3.25061	0.243015	13.3762	8.33447e-41	3.5513e-38
ENSG00000110492.15	MDK	7440.61	-2.95812	0.221706	-13.3426	1.30893e-40	5.44452e-38
ENSG00000110079.17	MS4A4A	346.631	-4.70895	0.355371	-13.2508	4.46464e-40	1.81389e-37
ENSG00000150471.16	ADGRL3	610.291	4.31274	0.3283	13.1366	2.03198e-39	8.06787e-37
ENSG00000145911.5	N4BP3	1944.06	4.09926	0.312872	13.102	3.20561e-39	1.24449e-36
ENSG00000262655.3	SPON1	2200.49	-3.61835	0.276548	-13.084	4.06671e-39	1.54447e-36
ENSG00000128918.14	ALDH1A2	358.441	-5.99092	0.458949	-13.0536	6.06417e-39	2.25406e-36
ENSG00000011028.13	MRC2	4807.35	-3.60353	0.279649	-12.8859	5.40648e-38	1.96773e-35
ENSG00000138795.9	LEF1	347.525	-6.98348	0.548022	-12.7431	3.40688e-37	1.21466e-34
ENSG00000143127.12	ITGA10	1244.3	-3.98504	0.31281	-12.7395	3.5679e-37	1.24662e-34
ENSG00000157927.16	RADIL	653.175	-4.4581	0.35198	-12.6658	9.15127e-37	3.13476e-34
ENSG00000137831.14	UACA	16659.3	2.67419	0.21182	12.6248	1.5414e-36	5.17853e-34
ENSG00000067141.16	NEO1	704.279	-4.83899	0.385093	-12.5658	3.25654e-36	1.07343e-33
ENSG00000082397.17	EPB41L3	497.284	-4.37408	0.357462	-12.2365	1.98437e-34	6.41981e-32
ENSG00000116157.5	GPX7	695.941	-3.36321	0.274986	-12.2305	2.13747e-34	6.78937e-32
ENSG00000115738.9	ID2	1164.63	-4.03126	0.332275	-12.1323	7.12306e-34	2.22214e-31
ENSG00000038295.7	TLL1	582.142	-6.49642	0.542591	-11.973	4.92418e-33	1.50922e-30
ENSG00000166426.7	CRABP1	321.518	-4.73641	0.395863	-11.9648	5.4339e-33	1.63673e-30
ENSG00000140937.13	CDH11	5657.05	-2.75441	0.232288	-11.8577	1.96198e-32	5.80946e-30
ENSG00000165443.11	PHYHIPL	280.904	4.592	0.389289	11.7959	4.09944e-32	1.19362e-29
ENSG00000077092.18	RARB	938.876	-4.97122	0.42414	-11.7207	9.98369e-32	2.85926e-29
ENSG00000178538.9	CA8	4033.39	-2.49498	0.213652	-11.6778	1.65565e-31	4.66521e-29
ENSG00000165507.8	DEPP1	14516	3.3447	0.286461	11.6759	1.69252e-31	4.69339e-29
ENSG00000164220.6	F2RL2	9548.46	-3.37559	0.289516	-11.6594	2.05441e-31	5.60788e-29
ENSG00000270885.1	RASL10B	228.048	-4.63495	0.400052	-11.5859	4.8601e-31	1.30624e-28
ENSG00000159216.18	RUNX1	269.486	-4.44859	0.384167	-11.5798	5.2148e-31	1.38034e-28
ENSG00000178860.8	MSC	1235.76	3.77409	0.326566	11.5569	6.81269e-31	1.77638e-28
ENSG00000095739.10	BAMBI	986.61	-3.49596	0.303142	-11.5324	9.05702e-31	2.32685e-28
ENSG00000172716.16	SLFN11	368.854	4.59735	0.40099	11.465	1.97761e-30	5.00707e-28
ENSG00000133116.7	KL	578.734	-3.95898	0.345424	-11.4612	2.06579e-30	5.15561e-28
ENSG00000144583.4	MARCH4	567.501	3.88548	0.339647	11.4398	2.64621e-30	6.51116e-28
ENSG00000254535.3	PABPC4L	726.014	-3.1207	0.275156	-11.3416	8.16447e-30	1.98102e-27
ENSG00000112715.21	VEGFA	676.154	-3.8554	0.340777	-11.3135	1.12454e-29	2.6912e-27
ENSG00000114251.14	WNT5A	1802.71	2.34525	0.207447	11.3053	1.2351e-29	2.91583e-27
ENSG00000091972.18	CD200	1311.87	-3.7987	0.336383	-11.2928	1.42499e-29	3.31928e-27
ENSG00000184113.9	CLDN5	35270.3	2.12049	0.188048	11.2763	1.71841e-29	3.95008e-27
ENSG00000138166.5	DUSP5	3965.65	-3.02636	0.268848	-11.2568	2.14447e-29	4.86544e-27
ENSG00000112769.18	LAMA4	22416.7	2.46058	0.220082	11.1803	5.09144e-29	1.14035e-26
ENSG00000046653.14	GPM6B	2300.53	2.49852	0.224279	11.1402	7.99389e-29	1.76776e-26
ENSG00000145284.11	SCD5	832.248	3.01225	0.272685	11.0466	2.27586e-28	4.96991e-26
ENSG00000183111.11	ARHGEF37	389.388	4.67357	0.423356	11.0393	2.46826e-28	5.32352e-26
ENSG00000090006.17	LTBP4	6120.54	-3.96307	0.359417	-11.0264	2.85044e-28	6.07283e-26
ENSG00000167767.13	KRT80	380.078	3.29078	0.298968	11.0071	3.53136e-28	7.43287e-26
ENSG00000143320.8	CRABP2	249.826	-5.01969	0.45762	-10.9691	5.37856e-28	1.11861e-25
ENSG00000170961.6	HAS2	506.937	-5.7028	0.521051	-10.9448	7.03736e-28	1.44639e-25
ENSG00000164161.9	HHIP	1240.68	3.29277	0.305369	10.7829	4.14453e-27	8.41918e-25
ENSG00000224383.7	PRR29	900.114	2.5717	0.238553	10.7805	4.25789e-27	8.55005e-25
ENSG00000133800.8	LYVE1	5942.6	2.61892	0.243626	10.7498	5.94171e-27	1.17956e-24
ENSG00000113369.8	ARRDC3	8589.98	-1.99713	0.187067	-10.676	1.31805e-26	2.58722e-24
ENSG00000073849.14	ST6GAL1	19393.7	-2.73555	0.258803	-10.57	4.10386e-26	7.87852e-24
ENSG00000115525.17	ST3GAL5	2100.13	2.21485	0.209537	10.5702	4.09588e-26	7.87852e-24
ENSG00000182732.17	RGS6	483.584	-3.83457	0.36378	-10.5409	5.5956e-26	1.06256e-23
ENSG00000162998.4	FRZB	227.444	-4.48627	0.42787	-10.4851	1.01111e-25	1.89937e-23
ENSG00000076706.16	MCAM	38574.4	3.31555	0.31858	10.4073	2.29666e-25	4.26836e-23
ENSG00000137573.13	SULF1	7439.6	-3.44348	0.331446	-10.3893	2.77485e-25	5.10281e-23
ENSG00000076351.12	SLC46A1	984.963	2.54493	0.244999	10.3875	2.82593e-25	5.14261e-23
ENSG00000166257.8	SCN3B	4202.42	3.62484	0.34917	10.3813	3.01595e-25	5.43181e-23
ENSG00000176692.6	FOXC2	2132.28	-3.02504	0.293712	-10.2993	7.0963e-25	1.26502e-22
ENSG00000099889.13	ARVCF	2403.32	2.56728	0.249316	10.2973	7.24744e-25	1.27892e-22
ENSG00000283632.2	EXOC3L2	9875.73	-2.95281	0.288616	-10.2309	1.44103e-24	2.51747e-22
ENSG00000137501.17	SYTL2	1915.58	-3.75589	0.367453	-10.2214	1.59003e-24	2.75028e-22
ENSG00000164318.17	EGFLAM	1028.98	3.36926	0.330493	10.1946	2.09514e-24	3.58844e-22
ENSG00000102802.9	MEDAG	386.947	-3.00735	0.29503	-10.1934	2.12292e-24	3.60072e-22
ENSG00000120156.20	TEK	23692.8	-2.04039	0.200373	-10.183	2.36275e-24	3.96896e-22
ENSG00000121570.12	DPPA4	344.503	-3.83936	0.377397	-10.1733	2.61032e-24	4.34307e-22
ENSG00000010671.15	BTK	281.353	-4.44478	0.438775	-10.13	4.06701e-24	6.7029e-22
ENSG00000117318.8	ID3	11488.9	-2.89069	0.286444	-10.0917	6.01493e-24	9.82064e-22
ENSG00000169129.14	AFAP1L2	3097.91	2.74812	0.272408	10.0882	6.22734e-24	1.00733e-21
ENSG00000130300.8	PLVAP	74219.3	-3.1226	0.309735	-10.0815	6.66735e-24	1.06861e-21
ENSG00000185885.15	IFITM1	623.12	-3.07429	0.30608	-10.0441	9.75558e-24	1.54936e-21
ENSG00000167992.12	VWCE	635.782	-2.80291	0.279695	-10.0213	1.2284e-23	1.93334e-21
ENSG00000124233.11	SEMG1	209.478	4.87449	0.48772	9.99443	1.61209e-23	2.51457e-21
ENSG00000106066.14	CPVL	310.194	-3.65681	0.366783	-9.96996	2.06316e-23	3.18968e-21
ENSG00000240694.8	PNMA2	167.999	4.08087	0.410008	9.95313	2.44377e-23	3.74497e-21
ENSG00000169432.15	SCN9A	811.181	3.02624	0.305225	9.91479	3.58996e-23	5.45361e-21
ENSG00000135916.15	ITM2C	31488.1	2.3263	0.234657	9.91363	3.63222e-23	5.47025e-21
ENSG00000184374.2	COLEC10	305.391	-4.41574	0.446704	-9.88516	4.8282e-23	7.20929e-21
ENSG00000245648.1	AC022075.1	704.362	3.77652	0.382779	9.86607	5.84094e-23	8.64756e-21
ENSG00000184408.9	KCND2	326.887	5.10835	0.519165	9.83955	7.60508e-23	1.11648e-20
ENSG00000101665.9	SMAD7	574.909	-4.02447	0.409074	-9.838	7.72318e-23	1.12437e-20
ENSG00000171388.11	APLN	39648	7.6404	0.776796	9.83578	7.89535e-23	1.13993e-20
ENSG00000118515.11	SGK1	1217.35	-2.25862	0.229879	-9.82527	8.76366e-23	1.25493e-20
ENSG00000183421.11	RIPK4	409.293	-11.9466	1.22097	-9.78449	1.31254e-22	1.86423e-20
ENSG00000174059.16	CD34	9659.73	2.40504	0.245881	9.78134	1.35407e-22	1.90771e-20
ENSG00000076716.8	GPC4	905.797	2.34449	0.239941	9.77109	1.49833e-22	2.09407e-20
ENSG00000198168.8	SVIP	1044.5	2.45649	0.252474	9.72968	2.25298e-22	3.12377e-20
ENSG00000106511.5	MEOX2	168.087	6.11026	0.631552	9.67499	3.85129e-22	5.25641e-20
ENSG00000166450.12	PRTG	857.384	-2.96127	0.306052	-9.67572	3.82401e-22	5.25641e-20
ENSG00000060718.21	COL11A1	4895.44	-2.70767	0.279933	-9.67256	3.94402e-22	5.34125e-20
ENSG00000050767.16	COL23A1	1880.49	-3.0504	0.316939	-9.62455	6.29839e-22	8.46407e-20
ENSG00000185737.12	NRG3	640.238	-3.07773	0.320173	-9.61268	7.06814e-22	9.42599e-20
ENSG00000151967.18	SCHIP1	7624.28	2.85942	0.297535	9.61037	7.22919e-22	9.56772e-20
ENSG00000169860.6	P2RY1	3017.14	-2.07314	0.215956	-9.59982	8.00821e-22	1.05191e-19
ENSG00000175274.18	TP53I11	13729	1.95004	0.203598	9.57792	9.9017e-22	1.29092e-19
ENSG00000102007.10	PLP2	711.844	3.50918	0.367136	9.55826	1.19757e-21	1.54974e-19
ENSG00000026025.15	VIM	68921.6	1.80788	0.189236	9.55356	1.25314e-21	1.60437e-19
ENSG00000163590.13	PPM1L	875.249	-2.49794	0.261478	-9.55315	1.25815e-21	1.60437e-19
ENSG00000080573.6	COL5A3	225.994	8.91229	0.933147	9.55079	1.2871e-21	1.62939e-19
ENSG00000181804.14	SLC9A9	1151.2	-2.16871	0.227669	-9.52572	1.63909e-21	2.06007e-19
ENSG00000183876.8	ARSI	352.894	-3.80499	0.399546	-9.52327	1.6782e-21	2.09416e-19
ENSG00000168994.13	PXDC1	2207.14	2.17808	0.228803	9.51945	1.74104e-21	2.15716e-19
ENSG00000079102.16	RUNX1T1	1384.03	-2.52311	0.265818	-9.49185	2.26961e-21	2.79226e-19
ENSG00000135409.10	AMHR2	200.416	-7.16068	0.755093	-9.48318	2.46642e-21	3.01317e-19
ENSG00000099998.17	GGT5	489.768	-3.83669	0.405817	-9.45423	3.25393e-21	3.94766e-19
ENSG00000206557.5	TRIM71	127.446	-5.8373	0.619007	-9.43011	4.09674e-21	4.93586e-19
ENSG00000137642.12	SORL1	881.358	-3.40446	0.361284	-9.42325	4.37354e-21	5.19767e-19
ENSG00000137941.16	TTLL7	453.041	2.55142	0.270754	9.42339	4.36753e-21	5.19767e-19
ENSG00000185070.10	FLRT2	2034.29	-2.96382	0.314798	-9.41499	4.73109e-21	5.5846e-19
ENSG00000104081.13	BMF	577.867	-3.10602	0.330913	-9.38623	6.21883e-21	7.29147e-19
ENSG00000143375.14	CGN	360.822	3.06761	0.327425	9.36891	7.3283e-21	8.53502e-19
ENSG00000160285.14	LSS	9814.87	1.75109	0.187721	9.32812	1.07768e-20	1.24682e-18
ENSG00000077063.10	CTTNBP2	316.018	-3.23893	0.347397	-9.32345	1.12619e-20	1.29438e-18
ENSG00000073350.13	LLGL2	616.623	2.60559	0.279729	9.3147	1.22299e-20	1.39644e-18
ENSG00000140263.13	SORD	2206.64	-2.16396	0.232401	-9.3113	1.26277e-20	1.42327e-18
ENSG00000159658.10	EFCAB14	33857.9	2.73689	0.29392	9.31169	1.25816e-20	1.42327e-18
ENSG00000142949.16	PTPRF	7449.17	2.12069	0.228057	9.29897	1.41814e-20	1.58814e-18
ENSG00000079257.7	LXN	1751.58	2.13875	0.23004	9.29731	1.4404e-20	1.60279e-18
ENSG00000139915.19	MDGA2	355.827	-4.25534	0.462089	-9.20891	3.2945e-20	3.64272e-18
ENSG00000100097.11	LGALS1	10709.4	1.77118	0.192408	9.20531	3.40689e-20	3.74329e-18
ENSG00000162545.5	CAMK2N1	341.369	-4.87872	0.531687	-9.17592	4.47719e-20	4.88853e-18
ENSG00000164035.9	EMCN	4696.94	-2.80378	0.305855	-9.16701	4.86301e-20	5.27681e-18
ENSG00000119787.13	ATL2	2319.9	-1.97172	0.215249	-9.1602	5.18032e-20	5.58643e-18
ENSG00000165806.19	CASP7	3682.65	2.00106	0.218916	9.14075	6.20201e-20	6.64718e-18
ENSG00000163762.6	TM4SF18	2821.92	2.89753	0.317014	9.14007	6.24113e-20	6.64832e-18
ENSG00000120693.13	SMAD9	433.132	-3.1898	0.349159	-9.13565	6.50146e-20	6.88366e-18
ENSG00000131370.15	SH3BP5	4297.16	1.80878	0.198182	9.12687	7.05109e-20	7.42063e-18
ENSG00000138646.8	HERC5	531.055	-3.89043	0.426641	-9.11875	7.59939e-20	7.94978e-18
ENSG00000007384.15	RHBDF1	2625.72	2.2178	0.243298	9.11558	7.82517e-20	8.13725e-18
ENSG00000143507.17	DUSP10	494.964	-2.45484	0.269714	-9.10162	8.89907e-20	9.19922e-18
ENSG00000187720.14	THSD4	852.335	2.67057	0.293638	9.09478	9.47764e-20	9.73966e-18
ENSG00000142961.14	MOB3C	1867.72	1.93031	0.213109	9.05788	1.33014e-19	1.35892e-17
ENSG00000197043.13	ANXA6	8123.16	1.67403	0.185253	9.03644	1.61861e-19	1.64402e-17
ENSG00000135111.15	TBX3	937.15	-2.39788	0.265769	-9.02243	1.83967e-19	1.85775e-17
ENSG00000187772.7	LIN28B	1680.06	-2.69137	0.299541	-8.98498	2.58773e-19	2.59814e-17
ENSG00000142871.16	CYR61	18786.1	2.41266	0.268756	8.97716	2.77847e-19	2.77371e-17
ENSG00000108960.8	MMD	2624.87	-1.81257	0.201976	-8.97418	2.85471e-19	2.83363e-17
ENSG00000122694.15	GLIPR2	1147.86	1.95088	0.21805	8.94693	3.65503e-19	3.60753e-17
ENSG00000213886.3	UBD	227.268	-5.75651	0.645292	-8.92079	4.62954e-19	4.54371e-17
ENSG00000123243.14	ITIH5	107.026	4.46034	0.500128	8.91839	4.73109e-19	4.61744e-17
ENSG00000267583.5	AC007998.3	159.653	6.69099	0.750679	8.91325	4.95572e-19	4.80981e-17
ENSG00000156298.12	TSPAN7	16873.8	-2.54984	0.286207	-8.90908	5.14578e-19	4.96667e-17
ENSG00000034677.12	RNF19A	6502.66	2.36973	0.266627	8.88781	6.23269e-19	5.9827e-17
ENSG00000164794.8	KCNV1	137.408	-5.80336	0.65336	-8.88233	6.54755e-19	6.25059e-17
ENSG00000149269.9	PAK1	612.668	-2.27174	0.255793	-8.88117	6.61605e-19	6.28165e-17
ENSG00000113389.15	NPR3	23548.9	-2.81315	0.317567	-8.85844	8.11397e-19	7.66222e-17
ENSG00000115844.10	DLX2	143.457	-7.45609	0.844732	-8.82658	1.07928e-18	1.01371e-16
ENSG00000103647.12	CORO2B	1083.69	2.38787	0.271002	8.81129	1.23718e-18	1.1558e-16
ENSG00000111962.7	UST	1658.7	-2.16056	0.245472	-8.80167	1.34797e-18	1.24502e-16
ENSG00000144476.5	ACKR3	7969.2	2.96716	0.337132	8.80116	1.35405e-18	1.24502e-16
ENSG00000183671.12	GPR1	441.598	3.36139	0.38189	8.80199	1.34412e-18	1.24502e-16
ENSG00000134755.15	DSC2	1563.65	-2.13086	0.242144	-8.79995	1.36876e-18	1.25195e-16
ENSG00000148926.9	ADM	3321.27	1.93993	0.220742	8.78824	1.51923e-18	1.38234e-16
ENSG00000111145.7	ELK3	8150.27	-1.75607	0.200677	-8.7507	2.12028e-18	1.91924e-16
ENSG00000204520.12	MICA	2152.68	1.9265	0.221111	8.7128	2.9645e-18	2.66958e-16
ENSG00000142611.16	PRDM16	579.151	-3.86792	0.445314	-8.68581	3.76038e-18	3.36891e-16
ENSG00000228495.1	LINC01013	235.288	10.5475	1.21604	8.67362	4.18582e-18	3.73093e-16
ENSG00000109738.10	GLRB	293.543	2.91694	0.3375	8.64278	5.486e-18	4.84042e-16
ENSG00000124785.8	NRN1	433.255	2.35623	0.272619	8.64296	5.47768e-18	4.84042e-16
ENSG00000162073.13	PAQR4	1056.43	1.91453	0.221668	8.63694	5.77406e-18	5.06899e-16
ENSG00000156687.10	UNC5D	118.257	-6.28522	0.729719	-8.6132	7.10476e-18	6.206e-16
ENSG00000109906.13	ZBTB16	735.208	-3.1708	0.368748	-8.59882	8.05364e-18	6.99986e-16
ENSG00000164116.16	GUCY1A1	313.662	-4.63963	0.540542	-8.58329	9.21971e-18	7.93552e-16
ENSG00000178695.5	KCTD12	1360.79	1.8851	0.219625	8.58327	9.22101e-18	7.93552e-16
ENSG00000159167.11	STC1	1628.02	2.06071	0.240308	8.57527	9.88558e-18	8.46574e-16
ENSG00000156113.22	KCNMA1	478.61	-4.23127	0.493825	-8.56836	1.0497e-17	8.9455e-16
ENSG00000066654.13	THUMPD1	1029.88	-1.97043	0.230042	-8.56552	1.07589e-17	9.12418e-16
ENSG00000166582.9	CENPV	404.72	-2.65597	0.310389	-8.55689	1.15952e-17	9.78593e-16
ENSG00000111912.19	NCOA7	6801.79	-1.91879	0.224615	-8.54254	1.31308e-17	1.10286e-15
ENSG00000110900.14	TSPAN11	7993.57	-2.14284	0.251196	-8.53055	1.45653e-17	1.21749e-15
ENSG00000112559.13	MDFI	1003.79	-3.15962	0.370542	-8.52702	1.50164e-17	1.24922e-15
ENSG00000104415.14	WISP1	760.095	-2.88066	0.33785	-8.52643	1.50933e-17	1.24966e-15
ENSG00000242265.5	PEG10	2709	2.26177	0.265868	8.50713	1.78292e-17	1.46923e-15
ENSG00000154930.14	ACSS1	392.565	2.96839	0.349006	8.50526	1.81195e-17	1.48614e-15
ENSG00000053328.8	METTL24	98.1227	-4.92518	0.579491	-8.49915	1.90982e-17	1.55909e-15
ENSG00000197594.12	ENPP1	1167.06	-2.28461	0.269258	-8.48485	2.15992e-17	1.75506e-15
ENSG00000134602.15	STK26	1250.65	-1.97276	0.232856	-8.47202	2.41181e-17	1.95066e-15
ENSG00000096433.10	ITPR3	2003.94	1.984	0.234319	8.4671	2.51589e-17	2.02546e-15
ENSG00000102010.14	BMX	2709.28	1.64767	0.194707	8.4623	2.62166e-17	2.10094e-15
ENSG00000108622.10	ICAM2	9175.26	2.23957	0.265418	8.4379	3.23095e-17	2.57738e-15
ENSG00000143502.14	SUSD4	253.841	-3.66424	0.43471	-8.42915	3.48177e-17	2.76484e-15
ENSG00000138772.12	ANXA3	1587.12	2.10685	0.250225	8.4198	3.77142e-17	2.9813e-15
ENSG00000003400.14	CASP10	824.904	2.33295	0.277144	8.41783	3.83527e-17	3.01812e-15
ENSG00000134709.10	HOOK1	146.155	-4.47785	0.53347	-8.39381	4.70637e-17	3.68701e-15
ENSG00000159388.5	BTG2	4469.18	1.62687	0.193912	8.38975	4.87186e-17	3.79962e-15
ENSG00000279393.1	AL139005.1	587.712	-2.61986	0.312516	-8.38314	5.15353e-17	4.00143e-15
ENSG00000143776.18	CDC42BPA	2089.64	1.88773	0.225345	8.37708	5.4255e-17	4.19396e-15
ENSG00000184792.15	OSBP2	327.79	3.17248	0.378754	8.37611	5.47078e-17	4.21033e-15
ENSG00000073756.11	PTGS2	895.991	-2.52183	0.301786	-8.35635	6.46868e-17	4.95648e-15
ENSG00000138435.15	CHRNA1	852.761	8.98354	1.07584	8.35025	6.81161e-17	5.19645e-15
ENSG00000275395.5	FCGBP	183.026	-10.4263	1.24915	-8.34673	7.01785e-17	5.33051e-15
ENSG00000197406.7	DIO3	306.201	-2.75662	0.330949	-8.32945	8.12167e-17	6.14224e-15
ENSG00000197747.8	S100A10	5337.92	1.56124	0.187703	8.31761	8.97583e-17	6.75896e-15
ENSG00000176463.13	SLCO3A1	2885.28	-1.71897	0.206712	-8.31576	9.11653e-17	6.83544e-15
ENSG00000259479.6	SORD2P	707.674	-2.27938	0.274126	-8.31508	9.16896e-17	6.84537e-15
ENSG00000169908.11	TM4SF1	16771.8	2.46493	0.296602	8.31057	9.52467e-17	7.08068e-15
ENSG00000138606.19	SHF	175.967	-3.24931	0.391595	-8.29763	1.06209e-16	7.86216e-15
ENSG00000133101.9	CCNA1	209.222	4.9086	0.591649	8.29647	1.07252e-16	7.90586e-15
ENSG00000111799.20	COL12A1	859.099	3.5643	0.430563	8.27823	1.25016e-16	9.1766e-15
ENSG00000112936.18	C7	1901.64	2.11402	0.256246	8.24996	1.58443e-16	1.15816e-14
ENSG00000134250.19	NOTCH2	2082.65	-3.08759	0.374455	-8.24555	1.64398e-16	1.19668e-14
ENSG00000173406.15	DAB1	139.655	-5.53504	0.672179	-8.23448	1.80347e-16	1.30733e-14
ENSG00000144057.15	ST6GAL2	455.445	4.47325	0.543892	8.22452	1.95977e-16	1.41476e-14
ENSG00000174469.21	CNTNAP2	135.617	-5.53491	0.673668	-8.21608	2.10268e-16	1.51168e-14
ENSG00000215012.8	RTL10	2094.37	1.73593	0.211341	8.2139	2.14116e-16	1.53304e-14
ENSG00000177409.11	SAMD9L	210.475	4.93812	0.602285	8.19896	2.42469e-16	1.72896e-14
ENSG00000163629.12	PTPN13	358.06	-2.7682	0.33775	-8.19602	2.4848e-16	1.76461e-14
ENSG00000046604.12	DSG2	1514.83	-2.25672	0.275471	-8.19222	2.56459e-16	1.8139e-14
ENSG00000144724.19	PTPRG	5816.26	-1.89077	0.231004	-8.18501	2.72285e-16	1.91807e-14
ENSG00000145687.16	SSBP2	2429.24	-1.89652	0.231965	-8.17591	2.93648e-16	2.05201e-14
ENSG00000196329.11	GIMAP5	529.942	-2.25978	0.276394	-8.17594	2.93566e-16	2.05201e-14
ENSG00000136960.12	ENPP2	13031.3	2.88172	0.353273	8.15721	3.42853e-16	2.38631e-14
ENSG00000129951.18	PLPPR3	157.636	-3.57401	0.438616	-8.14838	3.68842e-16	2.55701e-14
ENSG00000146094.14	DOK3	241.745	3.03167	0.373238	8.12262	4.56228e-16	3.15032e-14
ENSG00000143537.13	ADAM15	10905	1.67614	0.206708	8.10871	5.11606e-16	3.5188e-14
ENSG00000180340.6	FZD2	314.966	-2.66694	0.329287	-8.09913	5.53535e-16	3.79161e-14
ENSG00000235531.9	MSC-AS1	513.358	2.62066	0.323591	8.09867	5.55611e-16	3.79161e-14
ENSG00000131477.10	RAMP2	6897.12	-2.17321	0.2684	-8.0969	5.63757e-16	3.83223e-14
ENSG00000100300.17	TSPO	2733.31	2.23613	0.27622	8.09548	5.70386e-16	3.86226e-14
ENSG00000113196.2	HAND1	139.776	-10.1707	1.25879	-8.07979	6.48798e-16	4.37626e-14
ENSG00000102760.12	RGCC	560.1	3.69422	0.457808	8.06937	7.06626e-16	4.74798e-14
ENSG00000172292.14	CERS6	4265.36	-1.74555	0.216421	-8.06555	7.29093e-16	4.88018e-14
ENSG00000185361.8	TNFAIP8L1	6161.65	1.86491	0.231245	8.06466	7.34424e-16	4.89709e-14
ENSG00000003436.15	TFPI	107558	-1.51529	0.187948	-8.06231	7.48688e-16	4.97322e-14
ENSG00000161958.10	FGF11	183.113	-3.07523	0.381489	-8.06113	7.55953e-16	5.00246e-14
ENSG00000100985.7	MMP9	64459.7	-11.5415	1.43208	-8.05923	7.67754e-16	5.06138e-14
ENSG00000107742.12	SPOCK2	131.8	-7.12343	0.88401	-8.05809	7.74964e-16	5.0897e-14
ENSG00000166949.15	SMAD3	1690.47	-1.79402	0.222797	-8.05226	8.12819e-16	5.31833e-14
ENSG00000114200.9	BCHE	3703.89	1.63431	0.203571	8.02823	9.88869e-16	6.4461e-14
ENSG00000147872.9	PLIN2	4589.21	-1.68177	0.21064	-7.98409	1.41566e-15	9.19388e-14
ENSG00000059377.16	TBXAS1	460.855	-2.8007	0.35104	-7.97829	1.48379e-15	9.60067e-14
ENSG00000171345.13	KRT19	2494.86	-2.84339	0.357715	-7.94874	1.88413e-15	1.2146e-13
ENSG00000205542.10	TMSB4X	194497	1.46933	0.185186	7.93435	2.11606e-15	1.3591e-13
ENSG00000106236.3	NPTX2	1354.58	2.23409	0.28162	7.933	2.13912e-15	1.36888e-13
ENSG00000272398.5	CD24	35079.1	-1.65246	0.208864	-7.91165	2.54001e-15	1.61949e-13
ENSG00000126759.13	CFP	169.509	-8.92392	1.12814	-7.91029	2.56798e-15	1.63137e-13
ENSG00000122786.19	CALD1	13293.2	1.52216	0.192695	7.89931	2.80442e-15	1.76871e-13
ENSG00000154319.15	FAM167A	178.489	-4.70421	0.595498	-7.89963	2.79732e-15	1.76871e-13
ENSG00000136869.14	TLR4	2400.15	-1.57817	0.199921	-7.89394	2.928e-15	1.84e-13
ENSG00000143340.6	FAM163A	112.259	-6.58864	0.835005	-7.89054	3.00884e-15	1.88403e-13
ENSG00000104938.16	CLEC4M	323.748	3.95897	0.501877	7.88834	3.06244e-15	1.91074e-13
ENSG00000110042.7	DTX4	659.517	-1.98994	0.252817	-7.87107	3.51613e-15	2.18601e-13
ENSG00000050555.17	LAMC3	191.769	-2.85199	0.362936	-7.8581	3.90018e-15	2.41618e-13
ENSG00000169515.6	CCDC8	354.635	-2.28893	0.291456	-7.85342	4.04852e-15	2.49921e-13
ENSG00000138670.17	RASGEF1B	435.692	-3.33798	0.426217	-7.83164	4.81561e-15	2.96228e-13
ENSG00000131711.14	MAP1B	10850	1.49776	0.19126	7.83102	4.83934e-15	2.96643e-13
ENSG00000113657.12	DPYSL3	1344.06	2.08866	0.266734	7.8305	4.85943e-15	2.96833e-13
ENSG00000120937.8	NPPB	119.609	-4.07505	0.52052	-7.82881	4.92521e-15	2.99803e-13
ENSG00000154277.12	UCHL1	12453.5	1.78475	0.228123	7.82366	5.1311e-15	3.11251e-13
ENSG00000081138.13	CDH7	312.975	-2.79318	0.357728	-7.80812	5.80467e-15	3.50891e-13
ENSG00000116574.5	RHOU	184.05	-3.26627	0.418503	-7.80466	5.96641e-15	3.59425e-13
ENSG00000005469.11	CROT	8870.27	1.46543	0.188503	7.77405	7.60148e-15	4.5635e-13
ENSG00000003249.13	DBNDD1	485.338	2.2884	0.294873	7.76063	8.45111e-15	5.05619e-13
ENSG00000084234.17	APLP2	57232.3	1.39003	0.179237	7.75526	8.81613e-15	5.25658e-13
ENSG00000237988.5	OR2I1P	113.097	-8.76262	1.13422	-7.72571	1.11229e-14	6.60943e-13
ENSG00000070731.10	ST6GALNAC2	220.311	4.39085	0.568956	7.71738	1.18741e-14	7.03189e-13
ENSG00000164326.4	CARTPT	86.2763	-4.99712	0.650498	-7.682	1.5663e-14	9.24434e-13
ENSG00000160255.17	ITGB2	119.075	-5.81549	0.758448	-7.66763	1.75207e-14	1.0306e-12
ENSG00000170425.3	ADORA2B	1841.06	-2.17421	0.28378	-7.66163	1.83593e-14	1.0763e-12
ENSG00000111817.17	DSE	1012.62	-1.92339	0.251206	-7.65661	1.90907e-14	1.11543e-12
ENSG00000105889.15	STEAP1B	287.847	2.49962	0.326968	7.64485	2.09194e-14	1.21723e-12
ENSG00000180772.6	AGTR2	428.295	-7.25164	0.948605	-7.64452	2.09722e-14	1.21723e-12
ENSG00000011422.11	PLAUR	3968.77	2.09008	0.273931	7.62995	2.34848e-14	1.35854e-12
ENSG00000187773.8	FAM69C	111.063	-8.18226	1.07524	-7.60971	2.74717e-14	1.58393e-12
ENSG00000167601.11	AXL	949.001	-3.23484	0.425819	-7.59673	3.03702e-14	1.74529e-12
ENSG00000099284.13	H2AFY2	1498	-1.97867	0.260653	-7.59121	3.16921e-14	1.81528e-12
ENSG00000185909.14	KLHDC8B	6955.22	1.48229	0.195372	7.58703	3.27332e-14	1.86879e-12
ENSG00000261801.5	LOXL1-AS1	361.394	-2.41594	0.31886	-7.57682	3.5414e-14	2.01525e-12
ENSG00000156675.15	RAB11FIP1	699.824	2.77404	0.366569	7.56759	3.80204e-14	2.15655e-12
ENSG00000163673.7	DCLK3	136.724	4.45568	0.590494	7.54567	4.49953e-14	2.54391e-12
ENSG00000119772.16	DNMT3A	1743.04	-1.57259	0.208853	-7.52964	5.08793e-14	2.86729e-12
ENSG00000157617.16	C2CD2	1746.72	-1.80048	0.239239	-7.52586	5.23747e-14	2.94208e-12
ENSG00000110077.14	MS4A6A	327.646	-3.13799	0.418509	-7.49801	6.47922e-14	3.62758e-12
ENSG00000168243.10	GNG4	120.126	-5.17065	0.68964	-7.49761	6.49934e-14	3.62758e-12
ENSG00000171246.5	NPTX1	145.276	-6.0064	0.802641	-7.48329	7.24874e-14	4.03298e-12
ENSG00000019582.14	CD74	143.551	-3.71823	0.497335	-7.4763	7.64427e-14	4.23954e-12
ENSG00000113555.5	PCDH12	8922.38	1.511	0.202993	7.4436	9.79813e-14	5.41688e-12
ENSG00000132688.10	NES	1608.7	1.71243	0.230322	7.43493	1.0462e-13	5.76568e-12
ENSG00000153904.19	DDAH1	2215.98	1.82641	0.246675	7.40411	1.3203e-13	7.25336e-12
ENSG00000169116.11	PARM1	1051.76	-3.26632	0.442191	-7.38668	1.50543e-13	8.24449e-12
ENSG00000105246.5	EBI3	305.33	-2.30222	0.311796	-7.38374	1.53899e-13	8.40191e-12
ENSG00000147113.16	CXorf36	13405	1.93056	0.261493	7.38285	1.54942e-13	8.43253e-12
ENSG00000177469.12	CAVIN1	39784.9	1.4794	0.200592	7.37517	1.64137e-13	8.90522e-12
ENSG00000167600.13	CYP2S1	445.53	-2.82072	0.382589	-7.37272	1.67178e-13	9.04208e-12
ENSG00000173482.16	PTPRM	6880.39	1.79964	0.244264	7.3676	1.73726e-13	9.33846e-12
ENSG00000275896.5	PRSS2	387.148	8.96954	1.21739	7.36781	1.73449e-13	9.33846e-12
ENSG00000100979.14	PLTP	2361.24	-1.53731	0.20921	-7.34819	2.00914e-13	1.07668e-11
ENSG00000171208.9	NETO2	7791.01	1.41982	0.193238	7.34752	2.01913e-13	1.07872e-11
ENSG00000249790.2	AC092490.1	489.85	2.22616	0.303001	7.34705	2.02635e-13	1.07928e-11
ENSG00000100078.3	PLA2G3	267.859	3.72858	0.507842	7.34201	2.10403e-13	1.11725e-11
ENSG00000111885.6	MAN1A1	2533.78	-1.43956	0.19645	-7.32784	2.33898e-13	1.23824e-11
ENSG00000137693.13	YAP1	883.947	-1.80322	0.246306	-7.32106	2.46014e-13	1.29845e-11
ENSG00000074181.8	NOTCH3	3247.07	-1.9186	0.262137	-7.31908	2.49678e-13	1.31382e-11
ENSG00000122012.13	SV2C	94.3408	-5.64563	0.771765	-7.31521	2.56972e-13	1.34814e-11
ENSG00000166510.13	CCDC68	361.28	-3.88952	0.53176	-7.31443	2.58484e-13	1.35201e-11
ENSG00000115602.16	IL1RL1	977.912	-3.37693	0.462955	-7.29428	3.00256e-13	1.56581e-11
ENSG00000172201.11	ID4	1196.2	1.98322	0.272189	7.28617	3.18892e-13	1.65805e-11
ENSG00000184347.14	SLIT3	1145.95	-2.55405	0.350633	-7.28411	3.23803e-13	1.67859e-11
ENSG00000024422.11	EHD2	13556.2	1.54113	0.211764	7.27755	3.39934e-13	1.75181e-11
ENSG00000184226.14	PCDH9	1425.59	1.64437	0.22594	7.27792	3.39012e-13	1.75181e-11
ENSG00000080493.16	SLC4A4	644.526	-1.89425	0.260823	-7.26256	3.79831e-13	1.94025e-11
ENSG00000102575.11	ACP5	111.243	-9.34305	1.28633	-7.26331	3.77722e-13	1.94025e-11
ENSG00000169071.14	ROR2	105.744	-3.73918	0.514834	-7.26288	3.78937e-13	1.94025e-11
ENSG00000139289.13	PHLDA1	15191.6	1.98753	0.273817	7.2586	3.91118e-13	1.99208e-11
ENSG00000138080.13	EMILIN1	218.557	-2.61791	0.360982	-7.25218	4.10106e-13	2.08272e-11
ENSG00000135631.16	RAB11FIP5	953.323	1.7146	0.23658	7.24742	4.24774e-13	2.15096e-11
ENSG00000169891.17	REPS2	249.022	2.32033	0.320205	7.24639	4.28012e-13	2.16109e-11
ENSG00000130203.9	APOE	139.179	-3.18559	0.44023	-7.23619	4.61469e-13	2.32331e-11
ENSG00000136717.14	BIN1	2939.4	1.68567	0.233061	7.23273	4.73382e-13	2.37643e-11
ENSG00000198363.17	ASPH	6907.75	1.34748	0.186573	7.22228	5.11214e-13	2.559e-11
ENSG00000067715.13	SYT1	279.39	2.75579	0.382006	7.21398	5.43405e-13	2.71237e-11
ENSG00000163217.1	BMP10	68.1791	-9.55701	1.32589	-7.20801	5.67768e-13	2.8259e-11
ENSG00000123146.19	ADGRE5	693.87	1.82305	0.25315	7.20146	5.95701e-13	2.9565e-11
ENSG00000124831.18	LRRFIP1	4145.18	1.45638	0.202597	7.18854	6.54885e-13	3.24103e-11
ENSG00000005187.11	ACSM3	48894.1	2.24663	0.312857	7.18102	6.91934e-13	3.41471e-11
ENSG00000122862.4	SRGN	107.845	-6.70652	0.934139	-7.17936	7.00371e-13	3.43693e-11
ENSG00000185155.11	MIXL1	100.453	-6.22219	0.86664	-7.17967	6.98794e-13	3.43693e-11
ENSG00000164659.14	KIAA1324L	5401.59	2.15881	0.300955	7.1732	7.32638e-13	3.58137e-11
ENSG00000184470.20	TXNRD2	699.943	1.72368	0.240303	7.17297	7.33905e-13	3.58137e-11
ENSG00000105971.14	CAV2	4147.02	1.76383	0.24596	7.1712	7.43419e-13	3.61769e-11
ENSG00000166923.10	GREM1	109.75	-5.11339	0.71381	-7.16351	7.8637e-13	3.81608e-11
ENSG00000135480.15	KRT7	302.02	-3.20384	0.447378	-7.16137	7.98773e-13	3.86553e-11
ENSG00000129538.13	RNASE1	10198.6	1.31875	0.184429	7.15044	8.65006e-13	4.17449e-11
ENSG00000162645.12	GBP2	2141.32	1.56622	0.2191	7.14841	8.77882e-13	4.22496e-11
ENSG00000162878.12	PKDCC	376.417	2.27343	0.318229	7.14401	9.06439e-13	4.35041e-11
ENSG00000095794.19	CREM	2430.1	1.53153	0.21466	7.13469	9.70047e-13	4.64294e-11
ENSG00000004139.13	SARM1	1074.82	1.97184	0.276431	7.1332	9.80602e-13	4.66788e-11
ENSG00000078018.19	MAP2	291.368	2.45742	0.344501	7.13326	9.80213e-13	4.66788e-11
ENSG00000107518.17	ATRNL1	375.897	-3.00169	0.421537	-7.12083	1.07275e-12	5.09266e-11
ENSG00000162738.5	VANGL2	286.126	-2.74817	0.386207	-7.11579	1.11272e-12	5.26807e-11
ENSG00000130775.15	THEMIS2	158.226	2.94597	0.414783	7.10243	1.22584e-12	5.78793e-11
ENSG00000184371.13	CSF1	688.75	-2.03426	0.286762	-7.09391	1.30378e-12	6.13935e-11
ENSG00000147041.11	SYTL5	110.747	-6.26224	0.88283	-7.09337	1.30883e-12	6.14656e-11
ENSG00000135905.19	DOCK10	778.102	1.8315	0.258266	7.09154	1.32632e-12	6.21203e-11
ENSG00000131016.16	AKAP12	8894.61	1.37457	0.193893	7.08931	1.34786e-12	6.27921e-11
ENSG00000231298.6	MANCR	628.185	2.55897	0.360952	7.08949	1.34606e-12	6.27921e-11
ENSG00000139354.10	GAS2L3	418.863	2.02699	0.285986	7.08771	1.36348e-12	6.33508e-11
ENSG00000077616.10	NAALAD2	438.867	-1.98335	0.280137	-7.07993	1.44223e-12	6.68321e-11
ENSG00000069702.10	TGFBR3	6985.75	-2.36304	0.334475	-7.06493	1.60698e-12	7.42696e-11
ENSG00000167755.14	KLK6	650.649	-2.63489	0.37326	-7.05913	1.67554e-12	7.72338e-11
ENSG00000113719.15	ERGIC1	3310.37	1.34953	0.191798	7.03621	1.97543e-12	9.08179e-11
ENSG00000176720.5	BOK	2957.6	1.41672	0.201593	7.02763	2.10064e-12	9.63208e-11
ENSG00000134531.9	EMP1	8684.15	2.04141	0.290928	7.01689	2.26864e-12	1.03752e-10
ENSG00000077943.7	ITGA8	1133.04	-3.20946	0.457645	-7.013	2.3327e-12	1.06403e-10
ENSG00000170345.9	FOS	4061.16	-5.21124	0.743242	-7.01149	2.35789e-12	1.07272e-10
ENSG00000158813.17	EDA	308.576	-3.16728	0.452145	-7.00502	2.46955e-12	1.1206e-10
ENSG00000196611.4	MMP1	47342.8	7.72204	1.1038	6.99585	2.63662e-12	1.19331e-10
ENSG00000204767.3	INSYN2B	81.9433	-5.65523	0.809039	-6.99005	2.7478e-12	1.24042e-10
ENSG00000164877.18	MICALL2	376.421	2.61394	0.374054	6.98814	2.78546e-12	1.25418e-10
ENSG00000236671.8	PRKG1-AS1	90.623	-4.59181	0.657134	-6.98763	2.79568e-12	1.25554e-10
ENSG00000150593.17	PDCD4	8894.19	-1.36585	0.195525	-6.98557	2.83701e-12	1.27083e-10
ENSG00000103415.11	HMOX2	4966.49	1.44332	0.206662	6.98396	2.8698e-12	1.28223e-10
ENSG00000090530.9	P3H2	688.3	-1.86503	0.267544	-6.97096	3.14796e-12	1.40293e-10
ENSG00000182253.14	SYNM	400.338	2.06671	0.296505	6.97022	3.16441e-12	1.40667e-10
ENSG00000111058.7	ACSS3	127.977	-3.00509	0.431805	-6.95937	3.41794e-12	1.51552e-10
ENSG00000233056.2	ERVH48-1	104.604	-8.1321	1.16874	-6.95799	3.45155e-12	1.52654e-10
ENSG00000100036.12	SLC35E4	734.276	1.92696	0.277305	6.94888	3.68198e-12	1.62435e-10
ENSG00000128591.15	FLNC	1695.6	-1.93548	0.278731	-6.94389	3.81437e-12	1.67852e-10
ENSG00000127955.16	GNAI1	6275.24	-1.29676	0.186765	-6.94328	3.83088e-12	1.68155e-10
ENSG00000141668.9	CBLN2	149.102	-2.93088	0.422745	-6.93297	4.12102e-12	1.80437e-10
ENSG00000198774.4	RASSF9	125.653	-3.48137	0.502249	-6.93156	4.16214e-12	1.81781e-10
ENSG00000004468.12	CD38	62.0992	5.17134	0.7466	6.92651	4.31344e-12	1.8792e-10
ENSG00000147408.14	CSGALNACT1	11203.2	1.2784	0.184646	6.9235	4.40614e-12	1.91481e-10
ENSG00000140853.15	NLRC5	154.163	3.41349	0.493251	6.92038	4.50433e-12	1.95262e-10
ENSG00000089472.16	HEPH	3944	-1.47335	0.212945	-6.9189	4.5517e-12	1.96827e-10
ENSG00000114115.9	RBP1	1798.99	-2.43926	0.352993	-6.91023	4.83861e-12	2.08717e-10
ENSG00000185813.10	PCYT2	1696.06	1.54082	0.223112	6.90605	4.98333e-12	2.14431e-10
ENSG00000134324.11	LPIN1	1394.72	1.76826	0.256282	6.89967	5.21222e-12	2.23728e-10
ENSG00000176887.6	SOX11	452.073	2.09992	0.304538	6.89541	5.37107e-12	2.29982e-10
ENSG00000147257.13	GPC3	696.172	-3.30146	0.479782	-6.88116	5.9367e-12	2.5358e-10
ENSG00000124243.17	BCAS4	2878.14	1.338	0.194654	6.87374	6.25388e-12	2.66476e-10
ENSG00000161649.12	CD300LG	68.4718	-5.29247	0.770221	-6.87137	6.35895e-12	2.70294e-10
ENSG00000175928.5	LRRN1	79.9396	-4.72075	0.687769	-6.86386	6.70249e-12	2.84205e-10
ENSG00000177551.5	NHLH2	134.188	-3.47309	0.506225	-6.86077	6.84916e-12	2.89721e-10
ENSG00000136161.12	RCBTB2	1542.68	-1.4665	0.213844	-6.8578	6.9929e-12	2.95087e-10
ENSG00000168264.10	IRF2BP2	1930.76	-1.88766	0.275726	-6.84616	7.58608e-12	3.19346e-10
ENSG00000134853.11	PDGFRA	537.863	-3.63096	0.531112	-6.83653	8.11358e-12	3.40731e-10
ENSG00000179163.11	FUCA1	1054.74	1.48494	0.217898	6.81486	9.43539e-12	3.95291e-10
ENSG00000170421.12	KRT8	15038.8	-2.52646	0.371479	-6.8011	1.03824e-11	4.33925e-10
ENSG00000163430.11	FSTL1	21068.9	-1.4642	0.215555	-6.7927	1.10053e-11	4.58859e-10
ENSG00000128602.9	SMO	354.097	-2.35998	0.347673	-6.78794	1.13749e-11	4.73141e-10
ENSG00000160932.10	LY6E	1145.09	-1.79382	0.264492	-6.78215	1.18404e-11	4.91332e-10
ENSG00000184156.16	KCNQ3	176.948	2.81036	0.41448	6.78045	1.19801e-11	4.95953e-10
ENSG00000055118.14	KCNH2	66.9017	-9.01313	1.32959	-6.7789	1.21097e-11	5.00133e-10
ENSG00000118473.21	SGIP1	204.717	2.50553	0.369978	6.7721	1.26925e-11	5.22299e-10
ENSG00000181104.6	F2R	48075.2	-1.77908	0.262713	-6.77195	1.27062e-11	5.22299e-10
ENSG00000244300.2	GATA2-AS1	173.175	-3.78533	0.559102	-6.77037	1.28451e-11	5.26771e-10
ENSG00000121749.15	TBC1D15	2187.37	-1.35906	0.200847	-6.76664	1.31809e-11	5.38849e-10
ENSG00000196468.7	FGF16	56.7425	6.13508	0.906696	6.76641	1.32013e-11	5.38849e-10
ENSG00000130508.10	PXDN	83725.1	1.26757	0.187471	6.76144	1.3663e-11	5.56392e-10
ENSG00000118503.14	TNFAIP3	934.684	-1.99092	0.294607	-6.75787	1.40034e-11	5.68931e-10
ENSG00000170365.9	SMAD1	5010.26	1.69936	0.251507	6.75671	1.41163e-11	5.72186e-10
ENSG00000135046.13	ANXA1	13250.4	1.34431	0.199071	6.7529	1.44914e-11	5.86031e-10
ENSG00000147862.16	NFIB	2166.52	1.51764	0.224988	6.74542	1.52581e-11	6.15608e-10
ENSG00000173517.10	PEAK1	2350.13	1.41154	0.209369	6.74186	1.56377e-11	6.29472e-10
ENSG00000167972.13	ABCA3	4705.07	2.14534	0.318236	6.74134	1.56932e-11	6.30253e-10
ENSG00000188763.4	FZD9	369.617	-2.40489	0.357174	-6.7331	1.66082e-11	6.65472e-10
ENSG00000069667.15	RORA	446.958	2.20949	0.328184	6.73247	1.66806e-11	6.66842e-10
ENSG00000155307.18	SAMSN1	1025.32	1.50958	0.224277	6.73088	1.6864e-11	6.72633e-10
ENSG00000186767.6	SPIN4	5970.4	-1.34317	0.199596	-6.72942	1.70343e-11	6.77878e-10
ENSG00000119718.10	EIF2B2	3447.43	1.37593	0.204572	6.72588	1.74538e-11	6.92995e-10
ENSG00000135636.13	DYSF	15023.9	1.25143	0.186126	6.72356	1.77338e-11	7.02516e-10
ENSG00000250742.2	LINC02381	142.814	-4.30556	0.640688	-6.72021	1.8146e-11	7.17218e-10
ENSG00000131724.10	IL13RA1	4920.45	-1.29089	0.192244	-6.71488	1.88216e-11	7.40572e-10
ENSG00000158246.7	TENT5B	2813.16	-1.30876	0.194898	-6.71514	1.87889e-11	7.40572e-10
ENSG00000135917.14	SLC19A3	59.8529	-5.56372	0.831733	-6.6893	2.24236e-11	8.80317e-10
ENSG00000173262.11	SLC2A14	126.106	-3.04005	0.455289	-6.67719	2.43559e-11	9.54031e-10
ENSG00000099866.14	MADCAM1	88.1686	-4.91754	0.737316	-6.66952	2.56646e-11	1.00279e-09
ENSG00000114790.12	ARHGEF26	317.588	2.05874	0.308693	6.66923	2.57156e-11	1.00279e-09
ENSG00000120885.21	CLU	1759.13	2.23579	0.335519	6.66367	2.6707e-11	1.03913e-09
ENSG00000140465.13	CYP1A1	2852.36	-2.7054	0.406203	-6.66021	2.73442e-11	1.06156e-09
ENSG00000051128.18	HOMER3	3679.63	1.56274	0.234888	6.65316	2.86866e-11	1.11121e-09
ENSG00000082196.20	C1QTNF3	4392.3	-2.0574	0.309557	-6.6463	3.00559e-11	1.16168e-09
ENSG00000186994.11	KANK3	1142.86	1.46034	0.220048	6.63648	3.21267e-11	1.23897e-09
ENSG00000174498.13	IGDCC3	5090.98	-2.63388	0.397364	-6.62837	3.39404e-11	1.30603e-09
ENSG00000170915.8	PAQR8	2597.23	-1.3996	0.211168	-6.62789	3.40522e-11	1.30745e-09
ENSG00000101577.9	LPIN2	2303.27	-2.01182	0.303589	-6.62681	3.43027e-11	1.31418e-09
ENSG00000106537.7	TSPAN13	6029.51	-1.33636	0.202019	-6.61503	3.71472e-11	1.42005e-09
ENSG00000138678.10	GPAT3	852.989	-1.76571	0.267156	-6.60926	3.86243e-11	1.47329e-09
ENSG00000168077.13	SCARA3	391.621	-1.86945	0.282931	-6.60746	3.90967e-11	1.48806e-09
ENSG00000129250.11	KIF1C	3849.37	1.29863	0.196571	6.6064	3.93787e-11	1.49554e-09
ENSG00000135929.8	CYP27A1	863.492	-1.65545	0.250645	-6.60475	3.982e-11	1.50575e-09
ENSG00000137474.20	MYO7A	1176.99	-2.47397	0.374559	-6.60503	3.97449e-11	1.50575e-09
ENSG00000169245.5	CXCL10	120.688	-5.30357	0.803265	-6.60252	4.04224e-11	1.52523e-09
ENSG00000139970.16	RTN1	174.653	2.48447	0.37771	6.57773	4.77671e-11	1.79847e-09
ENSG00000154639.18	CXADR	4533.84	1.59414	0.242384	6.57695	4.80212e-11	1.80415e-09
ENSG00000169946.13	ZFPM2	1083.3	-1.66697	0.253537	-6.57485	4.87025e-11	1.82582e-09
ENSG00000185432.11	METTL7A	258.698	-2.27572	0.346536	-6.56704	5.13242e-11	1.91999e-09
ENSG00000107611.15	CUBN	804.381	1.90357	0.290163	6.56035	5.36826e-11	2.00392e-09
ENSG00000158270.11	COLEC12	8274.75	1.56005	0.238404	6.54373	6.00045e-11	2.23513e-09
ENSG00000174672.15	BRSK2	63.9184	5.21948	0.797709	6.54309	6.02595e-11	2.23986e-09
ENSG00000135074.15	ADAM19	2520.42	1.27668	0.195279	6.53772	6.2463e-11	2.31683e-09
ENSG00000137473.17	TTC29	631.822	-1.82985	0.280221	-6.53004	6.57522e-11	2.43367e-09
ENSG00000185352.8	HS6ST3	69.7138	-4.54468	0.696167	-6.52815	6.65859e-11	2.45931e-09
ENSG00000172037.13	LAMB2	25609.5	1.54476	0.23694	6.51964	7.04781e-11	2.59758e-09
ENSG00000196562.14	SULF2	11585.6	1.31364	0.201768	6.51066	7.48206e-11	2.75182e-09
ENSG00000250722.5	SELENOP	4515.56	-1.57184	0.241494	-6.50884	7.57343e-11	2.77957e-09
ENSG00000080845.17	DLGAP4	4231.6	1.28522	0.197597	6.50425	7.80841e-11	2.85981e-09
ENSG00000105639.18	JAK3	588.693	-2.0631	0.317695	-6.49399	8.35941e-11	3.05521e-09
ENSG00000118777.11	ABCG2	1370.42	-2.72818	0.420486	-6.48816	8.68906e-11	3.16906e-09
ENSG00000114861.20	FOXP1	3450.34	-1.38676	0.21381	-6.48594	8.81812e-11	3.20943e-09
ENSG00000139132.14	FGD4	585.385	1.75948	0.271766	6.47426	9.52805e-11	3.4606e-09
ENSG00000091490.10	SEL1L3	7352.35	2.05513	0.317512	6.47261	9.63274e-11	3.49137e-09
ENSG00000148204.11	CRB2	55.0223	-7.98845	1.23451	-6.47094	9.7395e-11	3.52276e-09
ENSG00000110092.3	CCND1	6708.09	1.30973	0.202466	6.4689	9.8717e-11	3.5632e-09
ENSG00000114739.13	ACVR2B	772.532	-1.67685	0.259661	-6.45784	1.06208e-10	3.82568e-09
ENSG00000163520.13	FBLN2	402.203	-3.31208	0.512907	-6.45746	1.06475e-10	3.8274e-09
ENSG00000145020.15	AMT	106.565	-3.25244	0.50375	-6.45647	1.07176e-10	3.8447e-09
ENSG00000067445.20	TRO	7819.93	-1.19016	0.184416	-6.45368	1.09168e-10	3.90812e-09
ENSG00000160789.19	LMNA	11573.5	1.56124	0.241985	6.45181	1.10525e-10	3.94863e-09
ENSG00000102172.15	SMS	24770.8	1.30008	0.201686	6.44608	1.14777e-10	4.09214e-09
ENSG00000137463.4	MGARP	152.352	-3.95032	0.612916	-6.44512	1.15511e-10	4.10994e-09
ENSG00000085552.16	IGSF9	128.242	-4.49259	0.697962	-6.43673	1.22071e-10	4.33452e-09
ENSG00000139679.15	LPAR6	3535.06	-1.46253	0.227402	-6.43149	1.26357e-10	4.47761e-09
ENSG00000174032.16	SLC25A30	1086.13	-1.57964	0.245869	-6.42471	1.32118e-10	4.67226e-09
ENSG00000056291.17	NPFFR2	921.277	1.97764	0.30791	6.42279	1.338e-10	4.7222e-09
ENSG00000081985.11	IL12RB2	149.663	-3.92174	0.61107	-6.41782	1.38236e-10	4.86893e-09
ENSG00000116711.9	PLA2G4A	1158.72	-1.918	0.298885	-6.4172	1.38803e-10	4.87904e-09
ENSG00000134198.9	TSPAN2	691.911	1.737	0.270751	6.41548	1.40379e-10	4.92455e-09
ENSG00000187266.13	EPOR	983.153	1.63463	0.25489	6.41309	1.42603e-10	4.99253e-09
ENSG00000260912.1	AL158206.1	2198.81	-1.26573	0.197503	-6.40865	1.46818e-10	5.12983e-09
ENSG00000157193.16	LRP8	876.582	1.64062	0.25623	6.40291	1.52444e-10	5.31576e-09
ENSG00000133134.11	BEX2	1033.97	-1.45452	0.227324	-6.39846	1.56956e-10	5.46219e-09
ENSG00000162407.8	PLPP3	2340.93	-2.28479	0.357213	-6.39616	1.59329e-10	5.53374e-09
ENSG00000264343.5	NOTCH2NLA	466.654	-3.5155	0.549745	-6.39478	1.60774e-10	5.57285e-09
ENSG00000138439.11	FAM117B	576.071	-1.59058	0.248901	-6.3904	1.65453e-10	5.7237e-09
ENSG00000154188.9	ANGPT1	266.168	-2.70563	0.423602	-6.38721	1.68944e-10	5.83292e-09
ENSG00000112759.17	SLC29A1	2226.7	1.63588	0.256136	6.38675	1.69451e-10	5.83886e-09
ENSG00000155760.2	FZD7	250.189	-3.14626	0.493881	-6.37048	1.88436e-10	6.48028e-09
ENSG00000139946.9	PELI2	700.71	-1.52234	0.239103	-6.36689	1.92893e-10	6.62053e-09
ENSG00000185811.18	IKZF1	71.7996	-4.17652	0.656094	-6.36573	1.9436e-10	6.65779e-09
ENSG00000138185.19	ENTPD1	5190.04	-1.67414	0.263036	-6.36466	1.95716e-10	6.69113e-09
ENSG00000115884.10	SDC1	135.62	-2.98897	0.470095	-6.35821	2.04114e-10	6.96458e-09
ENSG00000141655.16	TNFRSF11A	571.392	-1.80631	0.284349	-6.35243	2.11941e-10	7.21756e-09
ENSG00000122863.5	CHST3	480.312	-1.77973	0.280211	-6.35138	2.13395e-10	7.25294e-09
ENSG00000134326.11	CMPK2	694.213	2.16171	0.340471	6.34917	2.16484e-10	7.34363e-09
ENSG00000110080.18	ST3GAL4	1101.54	1.83708	0.289804	6.33906	2.31177e-10	7.82685e-09
ENSG00000076356.6	PLXNA2	5407.08	1.82397	0.287824	6.3371	2.34136e-10	7.9117e-09
ENSG00000151883.17	PARP8	439.398	-2.1824	0.344649	-6.33223	2.41648e-10	8.14979e-09
ENSG00000115461.4	IGFBP5	1716.41	2.7152	0.429261	6.32529	2.52752e-10	8.50785e-09
ENSG00000103310.10	ZP2	40.061	8.88175	1.4045	6.3238	2.55208e-10	8.574e-09
ENSG00000166960.16	CCDC178	157.243	2.85943	0.452351	6.32127	2.5943e-10	8.69912e-09
ENSG00000157514.16	TSC22D3	5138.43	-1.65108	0.261291	-6.31891	2.63423e-10	8.81609e-09
ENSG00000188158.15	NHS	362.652	-2.42337	0.38398	-6.31118	2.76909e-10	9.24971e-09
ENSG00000225968.7	ELFN1	783.633	-2.39601	0.379682	-6.31056	2.78023e-10	9.26919e-09
ENSG00000151388.10	ADAMTS12	463.413	-2.74866	0.435945	-6.30505	2.88096e-10	9.58673e-09
ENSG00000101680.14	LAMA1	157.414	-2.92609	0.464375	-6.30112	2.95494e-10	9.81421e-09
ENSG00000171992.12	SYNPO	420.018	-1.78404	0.283294	-6.2975	3.02483e-10	1.00273e-08
ENSG00000170456.15	DENND5B	1756.55	-1.76042	0.279631	-6.29553	3.06352e-10	1.01363e-08
ENSG00000167508.11	MVD	5174.35	1.6719	0.265598	6.29487	3.07659e-10	1.01603e-08
ENSG00000111846.17	GCNT2	1369.88	-1.6194	0.257273	-6.29447	3.08459e-10	1.01675e-08
ENSG00000196208.13	GREB1	464.006	-1.97012	0.313346	-6.28738	3.22869e-10	1.06225e-08
ENSG00000099219.13	ERMP1	2681.15	-1.23985	0.19722	-6.28665	3.24389e-10	1.06524e-08
ENSG00000078725.12	BRINP1	1481.89	-2.51786	0.400659	-6.28429	3.29349e-10	1.0795e-08
ENSG00000125266.7	EFNB2	24217.6	-1.26626	0.201638	-6.27985	3.38895e-10	1.10871e-08
ENSG00000129682.15	FGF13	289.114	-2.54932	0.405991	-6.27924	3.40225e-10	1.11098e-08
ENSG00000075213.10	SEMA3A	416.534	-2.84412	0.453134	-6.27655	3.46175e-10	1.1262e-08
ENSG00000184697.6	CLDN6	67.9139	-7.22453	1.15099	-6.27678	3.45662e-10	1.1262e-08
ENSG00000162496.8	DHRS3	1935.02	-1.56476	0.249803	-6.26398	3.75262e-10	1.21849e-08
ENSG00000253250.2	C8orf88	53.4698	-4.7907	0.764835	-6.2637	3.75938e-10	1.21849e-08
ENSG00000204291.10	COL15A1	346.79	-2.15278	0.34372	-6.26317	3.77237e-10	1.22043e-08
ENSG00000157601.13	MX1	302.045	-2.27595	0.363407	-6.26281	3.78101e-10	1.22097e-08
ENSG00000112137.17	PHACTR1	597.673	1.73781	0.277896	6.25345	4.01492e-10	1.29411e-08
ENSG00000130066.16	SAT1	3173.66	1.24708	0.19945	6.2526	4.03678e-10	1.29876e-08
ENSG00000101306.10	MYLK2	83.8555	3.24112	0.518726	6.24823	4.15136e-10	1.33317e-08
ENSG00000072682.18	P4HA2	3107.42	1.298	0.207755	6.24773	4.16456e-10	1.33495e-08
ENSG00000138030.12	KHK	234.41	2.83308	0.453807	6.24292	4.29478e-10	1.37417e-08
ENSG00000153885.14	KCTD15	3227.57	-1.33139	0.213476	-6.23672	4.46848e-10	1.42714e-08
ENSG00000163638.13	ADAMTS9	5964.28	1.37007	0.21975	6.23467	4.52727e-10	1.44327e-08
ENSG00000189058.8	APOD	90.4086	3.06762	0.492189	6.23261	4.58726e-10	1.45973e-08
ENSG00000128641.18	MYO1B	3702.51	1.42685	0.229315	6.2222	4.90219e-10	1.55711e-08
ENSG00000058668.14	ATP2B4	4210.19	1.31159	0.210815	6.22151	4.92401e-10	1.55871e-08
ENSG00000106123.11	EPHB6	113.635	-4.55189	0.731642	-6.22147	4.92506e-10	1.55871e-08
ENSG00000197457.9	STMN3	150.446	-2.73302	0.439491	-6.2186	5.01599e-10	1.58462e-08
ENSG00000111859.16	NEDD9	3090.96	2.2344	0.359641	6.21287	5.20265e-10	1.64062e-08
ENSG00000255330.9	AL096711.2	50.8274	4.80994	0.774596	6.20961	5.31177e-10	1.67201e-08
ENSG00000137959.15	IFI44L	66.6925	-6.61967	1.06678	-6.20528	5.4598e-10	1.71552e-08
ENSG00000126803.9	HSPA2	585.737	-1.73616	0.27999	-6.20079	5.61796e-10	1.76204e-08
ENSG00000175305.17	CCNE2	493.995	1.78803	0.288433	6.19914	5.67738e-10	1.77749e-08
ENSG00000079385.21	CEACAM1	1694.75	-1.8937	0.3055	-6.19869	5.69347e-10	1.77934e-08
ENSG00000086289.11	EPDR1	962.386	1.62469	0.26221	6.19613	5.78699e-10	1.80533e-08
ENSG00000167037.18	SGSM1	226.028	-2.12594	0.34333	-6.19212	5.9362e-10	1.84858e-08
ENSG00000143819.12	EPHX1	340.815	-2.10969	0.341557	-6.1767	6.5455e-10	2.03469e-08
ENSG00000102755.11	FLT1	57330.1	-1.23216	0.199625	-6.17236	6.72793e-10	2.08769e-08
ENSG00000130635.15	COL5A1	4759.8	1.80412	0.292668	6.16437	7.0764e-10	2.19193e-08
ENSG00000162552.14	WNT4	103.127	3.32576	0.539679	6.16247	7.16167e-10	2.21441e-08
ENSG00000095209.11	TMEM38B	1545.17	-1.47373	0.239168	-6.16191	7.18746e-10	2.21846e-08
ENSG00000197321.14	SVIL	3063.46	1.38655	0.225186	6.15738	7.39581e-10	2.27874e-08
ENSG00000172059.10	KLF11	1034.55	-1.38444	0.225486	-6.13979	8.2629e-10	2.54142e-08
ENSG00000164292.12	RHOBTB3	3883.47	-1.42623	0.232336	-6.13865	8.3226e-10	2.55529e-08
ENSG00000138639.17	ARHGAP24	719.041	2.28607	0.372734	6.13324	8.61067e-10	2.63909e-08
ENSG00000236609.3	ZNF853	566.999	-1.68627	0.275161	-6.1283	8.88254e-10	2.71765e-08
ENSG00000141298.18	SSH2	1495.61	1.78322	0.291248	6.12269	9.20105e-10	2.81018e-08
ENSG00000105699.16	LSR	361.714	-3.45955	0.565162	-6.12135	9.27863e-10	2.82893e-08
ENSG00000135312.6	HTR1B	45.1433	7.1822	1.17449	6.11515	9.64688e-10	2.93608e-08
ENSG00000158106.13	RHPN1	552.229	1.74093	0.285299	6.10212	1.04673e-09	3.16985e-08
ENSG00000166670.9	MMP10	3708.94	6.84757	1.12217	6.10209	1.04693e-09	3.16985e-08
ENSG00000169704.4	GP9	88.561	3.23283	0.529791	6.10208	1.04694e-09	3.16985e-08
ENSG00000145703.15	IQGAP2	2507.76	-1.30489	0.213926	-6.09975	1.06237e-09	3.21101e-08
ENSG00000083444.16	PLOD1	35771.7	1.25946	0.20652	6.09847	1.07089e-09	3.23117e-08
ENSG00000134873.9	CLDN10	50.8422	-6.99808	1.14846	-6.09344	1.10509e-09	3.32861e-08
ENSG00000109501.13	WFS1	4040.53	1.24247	0.204008	6.09031	1.12689e-09	3.38844e-08
ENSG00000187688.14	TRPV2	941.467	1.57619	0.258842	6.0894	1.13332e-09	3.40191e-08
ENSG00000162576.16	MXRA8	222.964	-3.38429	0.55587	-6.08828	1.14129e-09	3.41996e-08
ENSG00000125810.9	CD93	26862.6	1.61504	0.265824	6.07559	1.23532e-09	3.6954e-08
ENSG00000163092.19	XIRP2	89.0092	3.63789	0.599578	6.06742	1.29984e-09	3.88174e-08
ENSG00000163050.16	COQ8A	679.967	-1.45699	0.240675	-6.05377	1.41491e-09	4.21816e-08
ENSG00000110852.4	CLEC2B	327.036	1.94554	0.321489	6.05164	1.43378e-09	4.26715e-08
ENSG00000165072.9	MAMDC2	524.545	1.85695	0.307362	6.04157	1.52617e-09	4.5344e-08
ENSG00000137267.5	TUBB2A	8341.4	1.30701	0.216383	6.04025	1.53874e-09	4.55625e-08
ENSG00000140945.16	CDH13	6694.48	-1.42518	0.235939	-6.04046	1.53674e-09	4.55625e-08
ENSG00000100196.10	KDELR3	1194.87	1.62922	0.269761	6.03948	1.54608e-09	4.57021e-08
ENSG00000197535.14	MYO5A	2169.06	1.63841	0.271586	6.03275	1.61188e-09	4.75669e-08
ENSG00000141429.13	GALNT1	21276.3	1.51884	0.252194	6.0225	1.7174e-09	5.05952e-08
ENSG00000006042.11	TMEM98	2735.46	-1.23788	0.205581	-6.02137	1.72945e-09	5.08644e-08
ENSG00000100731.15	PCNX1	1445.8	-1.49188	0.248034	-6.01484	1.8007e-09	5.28709e-08
ENSG00000114812.12	VIPR1	403.707	10.6415	1.77261	6.00332	1.93326e-09	5.66679e-08
ENSG00000197956.9	S100A6	2289.17	1.34309	0.223868	5.99949	1.97937e-09	5.79223e-08
ENSG00000169783.12	LINGO1	796.582	-8.78619	1.46546	-5.99553	2.02824e-09	5.9253e-08
ENSG00000170412.16	GPRC5C	455.936	-2.32492	0.38798	-5.99236	2.06812e-09	6.03174e-08
ENSG00000154556.18	SORBS2	5808.92	4.51269	0.753486	5.98908	2.11029e-09	6.14445e-08
ENSG00000149557.13	FEZ1	2474.34	1.47026	0.245609	5.98616	2.14851e-09	6.24532e-08
ENSG00000166974.12	MAPRE2	4239.4	1.37821	0.230322	5.98382	2.17964e-09	6.3253e-08
ENSG00000135144.7	DTX1	49.2111	-8.1164	1.35677	-5.98215	2.20216e-09	6.38005e-08
ENSG00000183775.10	KCTD16	87.2059	-3.34651	0.559779	-5.97826	2.25531e-09	6.52323e-08
ENSG00000154734.14	ADAMTS1	759.422	-1.40721	0.23554	-5.97441	2.30924e-09	6.66818e-08
ENSG00000118513.18	MYB	181.682	-2.47557	0.414486	-5.97261	2.33484e-09	6.73097e-08
ENSG00000136490.8	LIMD2	4198.66	-1.3589	0.22763	-5.96974	2.37628e-09	6.83913e-08
ENSG00000056972.18	TRAF3IP2	293.471	1.95529	0.327806	5.96478	2.44964e-09	7.02713e-08
ENSG00000182050.13	MGAT4C	63.5249	-4.01168	0.672561	-5.96479	2.44955e-09	7.02713e-08
ENSG00000180354.15	MTURN	166.499	-2.69824	0.452936	-5.95722	2.56568e-09	7.34794e-08
ENSG00000148120.16	C9orf3	363.647	-1.68601	0.283239	-5.95261	2.63895e-09	7.54541e-08
ENSG00000127241.16	MASP1	3221.86	-2.39805	0.403149	-5.94829	2.70955e-09	7.73461e-08
ENSG00000184564.9	SLITRK6	78.5697	-7.52743	1.26555	-5.94794	2.71538e-09	7.73861e-08
ENSG00000111371.15	SLC38A1	4513.69	1.60792	0.270428	5.94581	2.75094e-09	7.82717e-08
ENSG00000164591.13	MYOZ3	333.977	-1.98235	0.333764	-5.93938	2.86107e-09	8.1273e-08
ENSG00000100906.10	NFKBIA	2724.11	-1.25681	0.211658	-5.93793	2.88643e-09	8.18272e-08
ENSG00000137103.19	TMEM8B	167.4	-3.14636	0.529892	-5.93773	2.88995e-09	8.18272e-08
ENSG00000132182.11	NUP210	435.474	1.77827	0.299704	5.93344	2.9666e-09	8.38617e-08
ENSG00000257219.5	LINC02407	144.68	2.52604	0.425811	5.9323	2.98728e-09	8.43098e-08
ENSG00000136574.17	GATA4	132.467	-4.39437	0.74133	-5.92768	3.07236e-09	8.65712e-08
ENSG00000146197.8	SCUBE3	433.656	-2.07665	0.350706	-5.92136	3.19297e-09	8.98246e-08
ENSG00000091409.14	ITGA6	2351.63	1.8999	0.321206	5.9149	3.32083e-09	9.32717e-08
ENSG00000120457.11	KCNJ5	46.414	5.60096	0.947993	5.90822	3.45815e-09	9.69725e-08
ENSG00000092841.18	MYL6	44144.8	1.24492	0.210732	5.90758	3.47173e-09	9.71009e-08
ENSG00000188211.8	NCR3LG1	205.745	2.32274	0.393187	5.90748	3.47384e-09	9.71009e-08
ENSG00000119638.12	NEK9	748.692	-1.52817	0.259203	-5.89565	3.73199e-09	1.03984e-07
ENSG00000144810.15	COL8A1	1231.34	2.10515	0.357063	5.89573	3.73018e-09	1.03984e-07
ENSG00000133816.15	MICAL2	3738.08	1.94969	0.331016	5.89002	3.86152e-09	1.07421e-07
ENSG00000050405.13	LIMA1	3147	1.32478	0.224941	5.88946	3.87462e-09	1.07615e-07
ENSG00000117335.19	CD46	13953.8	1.28291	0.218047	5.88362	4.014e-09	1.11309e-07
ENSG00000158747.14	NBL1	875.399	1.54748	0.263637	5.86974	4.36484e-09	1.20846e-07
ENSG00000060656.19	PTPRU	1379.37	1.75981	0.299933	5.86733	4.42859e-09	1.22411e-07
ENSG00000158321.16	AUTS2	355.248	-2.1256	0.362293	-5.86708	4.4354e-09	1.22411e-07
ENSG00000118242.15	MREG	324.767	1.84023	0.313963	5.86131	4.59225e-09	1.2654e-07
ENSG00000092068.19	SLC7A8	784.576	-5.28822	0.903536	-5.8528	4.83353e-09	1.32979e-07
ENSG00000162999.12	DUSP19	126.488	-2.76653	0.472723	-5.85233	4.84727e-09	1.3301e-07
ENSG00000178882.14	RFLNA	138.557	-3.11705	0.532625	-5.85224	4.84989e-09	1.3301e-07
ENSG00000265972.5	TXNIP	5963.95	-1.74867	0.299216	-5.84417	5.09102e-09	1.39405e-07
ENSG00000027075.14	PRKCH	6107.21	1.18409	0.20269	5.8419	5.16089e-09	1.41097e-07
ENSG00000107719.8	PALD1	7012.36	1.15753	0.198357	5.83557	5.3608e-09	1.46333e-07
ENSG00000091129.19	NRCAM	69.2931	-4.36636	0.748871	-5.8306	5.52296e-09	1.50524e-07
ENSG00000222041.11	CYTOR	1398.67	1.58238	0.271415	5.83013	5.53849e-09	1.50712e-07
ENSG00000244274.7	DBNDD2	306.225	1.78567	0.306843	5.81951	5.90213e-09	1.60358e-07
ENSG00000168016.14	TRANK1	353.545	-1.6536	0.284428	-5.81376	6.10834e-09	1.65703e-07
ENSG00000198668.10	CALM1	51751.7	1.11616	0.192046	5.8119	6.17663e-09	1.67296e-07
ENSG00000108175.16	ZMIZ1	2951.08	-1.44431	0.248564	-5.81062	6.22408e-09	1.6832e-07
ENSG00000119919.10	NKX2-3	60.7665	-7.24913	1.24808	-5.80823	6.31358e-09	1.70476e-07
ENSG00000119326.14	CTNNAL1	5787.03	-1.59824	0.275632	-5.79843	6.69379e-09	1.80464e-07
ENSG00000085063.15	CD59	14451.6	1.74874	0.301852	5.79337	6.89886e-09	1.85706e-07
ENSG00000197415.11	VEPH1	2155.08	1.74064	0.300517	5.79215	6.94923e-09	1.86774e-07
ENSG00000170955.9	CAVIN3	6411.58	1.29122	0.222967	5.7911	6.99287e-09	1.87658e-07
ENSG00000135547.8	HEY2	6226.26	-1.49336	0.258141	-5.78504	7.24964e-09	1.9425e-07
ENSG00000166813.14	KIF7	182.309	-2.28938	0.395814	-5.78398	7.29527e-09	1.95174e-07
ENSG00000125851.9	PCSK2	52.9951	6.1514	1.06387	5.78211	7.37683e-09	1.97054e-07
ENSG00000117643.14	MAN1C1	164.693	2.3663	0.409408	5.77981	7.47832e-09	1.9946e-07
ENSG00000149294.16	NCAM1	227.617	-2.37315	0.410849	-5.77622	7.63989e-09	2.03459e-07
ENSG00000147526.19	TACC1	12275.7	1.22956	0.212888	5.7756	7.66794e-09	2.03895e-07
ENSG00000138604.9	GLCE	3710.03	2.01377	0.348863	5.77238	7.81575e-09	2.07509e-07
ENSG00000007062.11	PROM1	193.882	-2.01701	0.349556	-5.7702	7.91764e-09	2.09895e-07
ENSG00000105520.10	PLPPR2	2429.15	1.2114	0.209976	5.76921	7.96424e-09	2.10811e-07
ENSG00000143061.17	IGSF3	503.952	-1.97115	0.341786	-5.76719	8.06036e-09	2.13033e-07
ENSG00000143772.9	ITPKB	3640.94	1.20061	0.208253	5.76518	8.1573e-09	2.15269e-07
ENSG00000117676.13	RPS6KA1	1410.77	-1.59664	0.277166	-5.76059	8.38226e-09	2.20872e-07
ENSG00000158473.6	CD1D	214.877	-3.16273	0.549376	-5.75695	8.56494e-09	2.25346e-07
ENSG00000100344.10	PNPLA3	400.134	1.76549	0.306716	5.75611	8.60745e-09	2.26124e-07
ENSG00000162415.6	ZSWIM5	191.046	-2.05875	0.357818	-5.75364	8.73437e-09	2.29113e-07
ENSG00000133110.14	POSTN	790.957	2.36236	0.410913	5.74905	8.97465e-09	2.35063e-07
ENSG00000049249.8	TNFRSF9	83.3329	-2.95668	0.514408	-5.74773	9.04519e-09	2.36556e-07
ENSG00000077942.18	FBLN1	4221.33	-1.43842	0.250345	-5.74575	9.15142e-09	2.38976e-07
ENSG00000119714.10	GPR68	63.4883	4.89916	0.853074	5.74294	9.3046e-09	2.42614e-07
ENSG00000172765.17	TMCC1	834.986	1.35873	0.236603	5.74266	9.32032e-09	2.42662e-07
ENSG00000248890.1	HHIP-AS1	108.161	2.84589	0.495731	5.74078	9.42411e-09	2.44999e-07
ENSG00000178922.16	HYI	268.599	1.8399	0.320726	5.73668	9.65518e-09	2.50633e-07
ENSG00000175416.12	CLTB	3504.73	1.15618	0.201681	5.73269	9.88479e-09	2.56213e-07
ENSG00000064300.8	NGFR	551.889	-7.53424	1.31655	-5.72273	1.04827e-08	2.71309e-07
ENSG00000250241.5	AC105383.1	360.103	1.6226	0.283849	5.71643	1.08785e-08	2.81134e-07
ENSG00000198892.6	SHISA4	390.992	1.64885	0.289038	5.70462	1.16601e-08	3.00889e-07
ENSG00000123119.11	NECAB1	45.1407	-4.79801	0.841297	-5.70311	1.17642e-08	3.03127e-07
ENSG00000172461.10	FUT9	111.711	2.54656	0.446672	5.70119	1.18971e-08	3.06102e-07
ENSG00000205593.11	DENND6B	231.357	1.87795	0.329706	5.69584	1.22767e-08	3.15403e-07
ENSG00000166963.12	MAP1A	574.484	1.58365	0.278072	5.69512	1.23287e-08	3.16274e-07
ENSG00000174136.11	RGMB	2001.84	1.36761	0.240379	5.6894	1.27489e-08	3.26573e-07
ENSG00000150764.13	DIXDC1	310.253	-2.12647	0.374109	-5.68408	1.31521e-08	3.36408e-07
ENSG00000101335.9	MYL9	2213.65	1.40037	0.246704	5.67631	1.37631e-08	3.51522e-07
ENSG00000146757.13	ZNF92	705.634	-1.36172	0.239917	-5.67581	1.38038e-08	3.52046e-07
ENSG00000146122.16	DAAM2	164.203	-3.25552	0.573744	-5.67418	1.39357e-08	3.54894e-07
ENSG00000162817.6	C1orf115	1200.04	1.27627	0.225343	5.66367	1.4817e-08	3.76787e-07
ENSG00000157510.13	AFAP1L1	20507.6	1.10813	0.195708	5.66215	1.49488e-08	3.79587e-07
ENSG00000139146.13	SINHCAF	6253.48	-1.19928	0.21188	-5.66017	1.51223e-08	3.83434e-07
ENSG00000205978.5	NYNRIN	2236.01	-1.25016	0.220996	-5.65692	1.54109e-08	3.90187e-07
ENSG00000061918.12	GUCY1B1	543.117	-1.91501	0.338675	-5.65441	1.56381e-08	3.94006e-07
ENSG00000064989.12	CALCRL	11863.3	-1.45797	0.257853	-5.65426	1.5652e-08	3.94006e-07
ENSG00000137285.9	TUBB2B	2725.88	1.40944	0.249254	5.65465	1.5616e-08	3.94006e-07
ENSG00000185274.11	GALNT17	122.655	-2.49711	0.441615	-5.6545	1.563e-08	3.94006e-07
ENSG00000122254.6	HS3ST2	62.4113	-6.31663	1.11739	-5.65302	1.5765e-08	3.96279e-07
ENSG00000118432.12	CNR1	62.7929	-5.18415	0.917605	-5.64965	1.60774e-08	4.03553e-07
ENSG00000159164.9	SV2A	303.468	-1.68157	0.297944	-5.64393	1.66213e-08	4.16606e-07
ENSG00000135622.12	SEMA4F	1114.17	1.39251	0.246758	5.64322	1.66897e-08	4.1772e-07
ENSG00000119681.11	LTBP2	2390.61	1.77529	0.314761	5.64012	1.69934e-08	4.24714e-07
ENSG00000112773.15	TENT5A	476.573	-1.95963	0.34767	-5.63646	1.73578e-08	4.332e-07
ENSG00000165795.23	NDRG2	444.005	-1.64132	0.291631	-5.62806	1.82248e-08	4.5419e-07
ENSG00000148218.15	ALAD	1244.84	1.21656	0.216246	5.6258	1.84648e-08	4.59516e-07
ENSG00000105329.9	TGFB1	7599.89	-1.24071	0.220677	-5.62228	1.8845e-08	4.68311e-07
ENSG00000206503.12	HLA-A	9836.71	1.20096	0.213875	5.61526	1.96262e-08	4.8703e-07
ENSG00000003989.17	SLC7A2	254.798	-2.63599	0.469544	-5.61393	1.97782e-08	4.90107e-07
ENSG00000186684.12	CYP27C1	65.5643	-5.12739	0.913821	-5.61094	2.01232e-08	4.97949e-07
ENSG00000182568.16	SATB1	452.113	-1.55986	0.27804	-5.61022	2.02073e-08	4.99323e-07
ENSG00000109113.19	RAB34	1157.89	-1.42075	0.253334	-5.60822	2.0442e-08	5.04408e-07
ENSG00000148600.14	CDHR1	36.3313	6.60308	1.17746	5.60791	2.04782e-08	5.04589e-07
ENSG00000126878.12	AIF1L	376.561	1.78592	0.318493	5.60741	2.05373e-08	5.04622e-07
ENSG00000196411.9	EPHB4	7007.96	-1.12787	0.201132	-5.60762	2.05128e-08	5.04622e-07
ENSG00000196352.15	CD55	4002.68	1.22454	0.218544	5.60316	2.10474e-08	5.16429e-07
ENSG00000138162.18	TACC2	1211.58	1.41187	0.252	5.60265	2.11101e-08	5.16517e-07
ENSG00000198189.10	HSD17B11	1249.05	-1.3928	0.24859	-5.60282	2.10892e-08	5.16517e-07
ENSG00000107882.11	SUFU	2734.27	-1.11793	0.199625	-5.60017	2.14145e-08	5.22978e-07
ENSG00000118785.13	SPP1	458.894	-2.23483	0.399076	-5.60001	2.1434e-08	5.22978e-07
ENSG00000119866.21	BCL11A	338.894	-1.9276	0.344302	-5.59857	2.16128e-08	5.26604e-07
ENSG00000258947.6	TUBB3	2885.37	1.42811	0.255303	5.59381	2.22135e-08	5.40486e-07
ENSG00000188517.15	COL25A1	3121.31	-1.5571	0.279099	-5.57903	2.41863e-08	5.8767e-07
ENSG00000180730.4	SHISA2	1790.12	-4.66291	0.835829	-5.57878	2.42204e-08	5.87682e-07
ENSG00000149798.4	CDC42EP2	1459.26	1.73475	0.311103	5.57614	2.4591e-08	5.95846e-07
ENSG00000156587.15	UBE2L6	2061.75	-1.8031	0.323735	-5.56967	2.55228e-08	6.17566e-07
ENSG00000182118.7	FAM89A	5725.81	1.38229	0.248405	5.56465	2.62682e-08	6.34723e-07
ENSG00000028137.18	TNFRSF1B	28143.3	-2.10013	0.377456	-5.56392	2.63779e-08	6.35615e-07
ENSG00000106665.15	CLIP2	1423.22	1.19931	0.215549	5.56397	2.63699e-08	6.35615e-07
ENSG00000176834.13	VSIG10	1795.14	-1.18162	0.212615	-5.55755	2.73593e-08	6.58356e-07
ENSG00000042493.15	CAPG	626.249	-1.54626	0.278392	-5.55425	2.78806e-08	6.69979e-07
ENSG00000058091.16	CDK14	1325.24	-1.57282	0.283227	-5.55322	2.80458e-08	6.73022e-07
ENSG00000131914.10	LIN28A	180.437	-9.47047	1.70574	-5.55212	2.82228e-08	6.7634e-07
ENSG00000125740.13	FOSB	110.776	-3.91701	0.707516	-5.53628	3.0896e-08	7.39388e-07
ENSG00000128567.16	PODXL	6083.95	1.42967	0.258252	5.53595	3.09537e-08	7.39756e-07
ENSG00000163485.16	ADORA1	51.3891	-4.51161	0.815669	-5.53118	3.18084e-08	7.59142e-07
ENSG00000221926.12	TRIM16	8506.93	4.41935	0.799658	5.52655	3.26591e-08	7.78383e-07
ENSG00000162804.13	SNED1	95.1453	3.98734	0.722043	5.5223	3.3459e-08	7.96361e-07
ENSG00000054356.13	PTPRN	66.833	-4.98526	0.903659	-5.51675	3.45322e-08	8.20786e-07
ENSG00000139998.15	RAB15	1195.45	1.29454	0.234821	5.51289	3.52983e-08	8.37856e-07
ENSG00000137842.6	TMEM62	512.534	1.69381	0.307524	5.5079	3.63129e-08	8.60769e-07
ENSG00000153707.16	PTPRD	601.601	-1.42436	0.258703	-5.50578	3.67528e-08	8.70016e-07
ENSG00000154127.9	UBASH3B	495.437	-1.55985	0.283339	-5.50522	3.68702e-08	8.71613e-07
ENSG00000113580.14	NR3C1	1719.88	-1.11675	0.203218	-5.49533	3.89983e-08	9.20675e-07
ENSG00000082126.17	MPP4	108.469	2.94794	0.53663	5.49342	3.94222e-08	9.29426e-07
ENSG00000134201.11	GSTM5	26.7548	-8.21095	1.4954	-5.4908	4.0012e-08	9.4206e-07
ENSG00000198542.13	ITGBL1	53.3376	4.53535	0.826868	5.48498	4.1352e-08	9.723e-07
ENSG00000165379.13	LRFN5	377.389	-1.7532	0.319791	-5.48235	4.19722e-08	9.85557e-07
ENSG00000277117.4	FP565260.3	556.46	1.36865	0.24987	5.47744	4.31511e-08	1.01188e-06
ENSG00000073008.14	PVR	3897.98	1.08056	0.197393	5.47417	4.39574e-08	1.0294e-06
ENSG00000185624.14	P4HB	55005.6	1.06272	0.194217	5.47182	4.45445e-08	1.04176e-06
ENSG00000090376.10	IRAK3	232.687	-2.39428	0.437672	-5.47048	4.4882e-08	1.04825e-06
ENSG00000138722.9	MMRN1	43647.7	-1.02816	0.188117	-5.46555	4.61474e-08	1.07636e-06
ENSG00000115380.19	EFEMP1	41047.3	1.60931	0.294765	5.45964	4.77093e-08	1.11131e-06
ENSG00000154642.10	C21orf91	545.783	-1.3835	0.253573	-5.45601	4.86959e-08	1.13278e-06
ENSG00000177098.8	SCN4B	65.64	-7.33022	1.34529	-5.44879	5.07146e-08	1.17817e-06
ENSG00000124780.13	KCNK17	5442.31	-10.2719	1.88926	-5.43701	5.4182e-08	1.25574e-06
ENSG00000163346.16	PBXIP1	4120.35	1.20151	0.220989	5.43696	5.41972e-08	1.25574e-06
ENSG00000130700.6	GATA5	34.9062	-7.53277	1.38573	-5.43595	5.45039e-08	1.26117e-06
ENSG00000203805.10	PLPP4	229.888	-2.60742	0.480931	-5.4216	5.90675e-08	1.36496e-06
ENSG00000099849.14	RASSF7	266.961	1.86465	0.343965	5.42105	5.92483e-08	1.36733e-06
ENSG00000178445.9	GLDC	262.817	2.4995	0.461317	5.41818	6.02072e-08	1.38763e-06
ENSG00000163362.10	INAVA	47.5015	-4.41429	0.815754	-5.4113	6.25701e-08	1.44018e-06
ENSG00000256540.1	AC007406.3	82.894	-4.43486	0.82007	-5.4079	6.37677e-08	1.46582e-06
ENSG00000116678.19	LEPR	1020.82	-1.42412	0.263642	-5.40171	6.60093e-08	1.51535e-06
ENSG00000277734.7	TRAC	60.4231	3.75181	0.694684	5.40075	6.63641e-08	1.5215e-06
ENSG00000111907.20	TPD52L1	279.223	-2.12171	0.393202	-5.39597	6.81543e-08	1.56049e-06
ENSG00000041353.9	RAB27B	127.158	-4.32941	0.802378	-5.39573	6.82461e-08	1.56055e-06
ENSG00000103449.11	SALL1	185.972	-2.49025	0.462246	-5.38727	7.15342e-08	1.6336e-06
ENSG00000144339.11	TMEFF2	72.1548	-5.19325	0.964861	-5.38238	7.35073e-08	1.67647e-06
ENSG00000163788.13	SNRK	16584.9	-1.05392	0.19588	-5.38044	7.43025e-08	1.69239e-06
ENSG00000119917.13	IFIT3	1376.3	-1.46554	0.272422	-5.37968	7.46199e-08	1.6952e-06
ENSG00000206149.10	HERC2P9	196.334	2.10818	0.391878	5.37968	7.4617e-08	1.6952e-06
ENSG00000162981.13	FAM84A	3325.05	1.59126	0.295967	5.37649	7.59507e-08	1.72319e-06
ENSG00000158528.11	PPP1R9A	356.992	1.80939	0.336713	5.37369	7.71404e-08	1.74792e-06
ENSG00000107796.13	ACTA2	1708.79	-1.63051	0.303449	-5.37327	7.73227e-08	1.74978e-06
ENSG00000138449.10	SLC40A1	2807.2	-1.31601	0.244928	-5.37303	7.74233e-08	1.74979e-06
ENSG00000120708.16	TGFBI	4206.91	-1.80602	0.336147	-5.37272	7.75583e-08	1.75057e-06
ENSG00000127990.17	SGCE	1117.65	1.3873	0.258361	5.36963	7.88968e-08	1.77849e-06
ENSG00000149573.8	MPZL2	44.5304	4.56747	0.851616	5.3633	8.17145e-08	1.83963e-06
ENSG00000196781.14	TLE1	5523.92	-1.36878	0.255324	-5.36096	8.27824e-08	1.86127e-06
ENSG00000142748.12	FCN3	81.3265	-2.89023	0.539354	-5.35869	8.38254e-08	1.8823e-06
ENSG00000135604.9	STX11	142.809	4.48983	0.837945	5.35815	8.40804e-08	1.8856e-06
ENSG00000214944.9	ARHGEF28	2277.28	4.50352	0.841071	5.35451	8.57908e-08	1.92149e-06
ENSG00000138685.15	FGF2	473.62	-1.82731	0.341311	-5.35381	8.61206e-08	1.92641e-06
ENSG00000101115.12	SALL4	331.842	-6.44914	1.20543	-5.35006	8.79234e-08	1.96422e-06
ENSG00000148053.15	NTRK2	200.745	2.13068	0.398312	5.34929	8.83022e-08	1.97017e-06
ENSG00000106624.10	AEBP1	2155.66	-2.07261	0.387596	-5.34734	8.92586e-08	1.98896e-06
ENSG00000081320.10	STK17B	655.841	-1.61603	0.302394	-5.34412	9.08554e-08	2.02092e-06
ENSG00000097021.19	ACOT7	4682.91	1.06386	0.199076	5.34399	9.09241e-08	2.02092e-06
ENSG00000071205.11	ARHGAP10	699.185	1.253	0.234505	5.34316	9.13387e-08	2.02756e-06
ENSG00000165757.8	JCAD	1793.98	1.17184	0.219407	5.34093	9.24705e-08	2.05008e-06
ENSG00000144560.14	VGLL4	4977.26	-1.08568	0.203342	-5.3392	9.33584e-08	2.06714e-06
ENSG00000158966.14	CACHD1	1583.24	-1.20703	0.226161	-5.33705	9.44724e-08	2.08916e-06
ENSG00000101265.15	RASSF2	7763	2.07766	0.389357	5.33612	9.49569e-08	2.09721e-06
ENSG00000120437.8	ACAT2	6055.45	0.991822	0.185882	5.33577	9.51412e-08	2.09863e-06
ENSG00000013619.13	MAMLD1	927.627	1.81635	0.340627	5.33237	9.6939e-08	2.13559e-06
ENSG00000109819.8	PPARGC1A	1296.62	-1.44548	0.271141	-5.33109	9.76244e-08	2.14798e-06
ENSG00000159023.21	EPB41	2570.04	-1.1054	0.207383	-5.33023	9.80898e-08	2.15551e-06
ENSG00000228830.1	AL160408.2	301.262	-2.00224	0.376404	-5.3194	1.04113e-07	2.28499e-06
ENSG00000259207.7	ITGB3	440.368	1.61948	0.304633	5.31616	1.05978e-07	2.323e-06
ENSG00000184557.4	SOCS3	2081.35	-1.91224	0.359907	-5.31314	1.07752e-07	2.35893e-06
ENSG00000197119.12	SLC25A29	1277.33	1.3301	0.25057	5.30829	1.10657e-07	2.41949e-06
ENSG00000099869.7	IGF2-AS	184.528	-2.71065	0.510725	-5.30745	1.11172e-07	2.42773e-06
ENSG00000196639.6	HRH1	146.366	2.85088	0.538016	5.29887	1.16519e-07	2.5413e-06
ENSG00000172031.6	EPHX4	816.578	1.47117	0.277693	5.29784	1.1718e-07	2.55254e-06
ENSG00000164970.14	FAM219A	1177.78	1.29124	0.243991	5.29215	1.20885e-07	2.62996e-06
ENSG00000182492.15	BGN	8255.49	-1.91472	0.36185	-5.29147	1.21336e-07	2.63649e-06
ENSG00000143369.14	ECM1	384.333	1.56108	0.295111	5.28981	1.22442e-07	2.65485e-06
ENSG00000149809.14	TM7SF2	2110.66	1.27255	0.240579	5.28952	1.22637e-07	2.65485e-06
ENSG00000282851.2	BISPR	294.407	-3.25236	0.614843	-5.28975	1.22487e-07	2.65485e-06
ENSG00000100311.16	PDGFB	1930.47	1.29011	0.243915	5.2892	1.22851e-07	2.65619e-06
ENSG00000183166.10	CALN1	268.373	-2.57096	0.486397	-5.28573	1.25207e-07	2.70379e-06
ENSG00000169851.15	PCDH7	873.753	-4.99558	0.945451	-5.28381	1.26527e-07	2.72891e-06
ENSG00000143816.7	WNT9A	39.5321	6.22323	1.17848	5.28073	1.28667e-07	2.77165e-06
ENSG00000085733.15	CTTN	5512.42	1.04857	0.198579	5.28034	1.28943e-07	2.77418e-06
ENSG00000137509.10	PRCP	27824.2	-1.13276	0.21462	-5.278	1.30602e-07	2.80641e-06
ENSG00000198873.11	GRK5	1475.17	1.3222	0.250757	5.27285	1.34325e-07	2.88287e-06
ENSG00000137393.9	RNF144B	2585.65	1.30751	0.248291	5.26601	1.39417e-07	2.98849e-06
ENSG00000187239.16	FNBP1	1864.97	-1.34192	0.25485	-5.26554	1.39777e-07	2.99254e-06
ENSG00000181830.8	SLC35C1	2057.86	1.14269	0.21717	5.26171	1.42719e-07	3.05177e-06
ENSG00000179361.17	ARID3B	2933.21	-1.02426	0.19471	-5.26041	1.43735e-07	3.06973e-06
ENSG00000139182.14	CLSTN3	10619.8	-1.46709	0.279013	-5.25815	1.45514e-07	3.10393e-06
ENSG00000283265.1	AL356234.3	37.1671	-4.55708	0.867479	-5.25324	1.49443e-07	3.18386e-06
ENSG00000177144.7	NUDT4B	3379.38	1.65507	0.315211	5.25068	1.51542e-07	3.22464e-06
ENSG00000170175.10	CHRNB1	381.254	1.48312	0.282644	5.24731	1.54332e-07	3.28002e-06
ENSG00000159217.9	IGF2BP1	5088.63	-1.08231	0.206343	-5.24522	1.56099e-07	3.31356e-06
ENSG00000143341.11	HMCN1	375.105	-2.26321	0.431591	-5.24387	1.57245e-07	3.33382e-06
ENSG00000107242.17	PIP5K1B	91.4091	3.27321	0.624296	5.24304	1.57956e-07	3.3408e-06
ENSG00000163751.3	CPA3	47.7933	3.79499	0.723799	5.24315	1.57854e-07	3.3408e-06
ENSG00000112276.13	BVES	612.402	1.49102	0.284424	5.24223	1.58647e-07	3.35135e-06
ENSG00000274588.1	DGKK	1130.06	-1.5227	0.290678	-5.23844	1.6194e-07	3.41678e-06
ENSG00000168461.12	RAB31	4853.33	-1.0543	0.201297	-5.23755	1.62721e-07	3.42911e-06
[truncated: 57,892 more rows]

## Sheet: (D) Venn
p1 CHIR Up	p1 CHIR Down	p3 CHIR Up	p3 CHIR Down					Consistent
[truncated: 2,016 more rows]
