# Supplementary material for: Wnt signaling mediates acquisition of blood–brain barrier properties in naïve endothelium derived from human pluripotent stem cells
Source: eLife. 2021 Nov 10;10:e70992. doi: 10.7554/eLife.70992 (PMC8664294; doi:10.7554/eLife.70992)
Supplement: Supplementary file 3. — For each gene, module assignment, correlation with experimental variables (CHIR treatment and passage number), and module membership (correlation between gene and module eigengene) are shown. Genes with an average of fewer than 50 estimated counts were excluded from this analysis. [file elife-70992-supp3.xlsx]

## Sheet: Sheet1
		CHIR v. DMSO		Passage 3 v. Passage 1		Green		Brown		Pink		Black		Yellow		Blue		Turquoise		Red		Magenta		Grey
Gene	Module	r	P	r	P	r	P	r	P	r	P	r	P	r	P	r	P	r	P	r	P	r	P	r	P
ASCC2	black	0.637945	0.0140976	0.0247965	0.932944	0.571832	0.0326364	-0.403681	0.152318	0.291771	0.311456	0.761991	0.00153678	0.00934869	0.974697	-0.120237	0.682223	0.0362182	0.90217	0.387699	0.170786	-0.167343	0.567444	0.0595567	0.839727
NISCH	black	0.632224	0.0152688	-0.546157	0.0433248	0.733356	0.00283867	-0.758766	0.00165338	0.375112	0.186312	0.805994	0.000499619	0.564422	0.0354942	0.302666	0.292884	-0.306851	0.285925	0.164267	0.574688	-0.0708824	0.809716	0.0382536	0.896698
DLGAP1	black	0.62036	0.0179329	-0.252144	0.38449	0.599607	0.023423	-0.573257	0.032107	0.384043	0.175205	0.764043	0.00146608	0.33514	0.241466	0.0790166	0.788309	-0.112747	0.701159	0.309751	0.28116	-0.192196	0.510369	0.172711	0.554896
SUPT5H	black	0.602138	0.0226931	-0.423498	0.131319	0.595358	0.0246872	-0.558824	0.0377727	0.239835	0.408878	0.919001	3.41795e-06	0.373735	0.188063	0.118761	0.685941	-0.145717	0.619148	0.275538	0.340345	-0.189602	0.516201	0.0167923	0.954564
MAGED4B	black	0.59902	0.0235945	-0.016769	0.954627	0.574903	0.0315035	-0.398815	0.157795	0.0852324	0.772042	0.893125	1.70277e-05	0.0516576	0.860781	-0.043604	0.882336	-0.0528143	0.857692	0.40912	0.146349	-0.273436	0.344192	-0.112225	0.702484
SELL	black	0.588092	0.0269672	-0.431237	0.123676	0.659047	0.0103601	-0.703139	0.00502678	0.373036	0.188956	0.653718	0.0112219	0.503533	0.0664121	0.200841	0.491148	-0.212917	0.464881	0.0425165	0.885253	0.0412915	0.88854	-0.0728958	0.804405
NFRKB	black	0.565701	0.0349884	-0.392853	0.164678	0.6955	0.00574717	-0.635983	0.0144912	0.333008	0.244659	0.790058	0.000773128	0.350808	0.218779	0.351822	0.217358	-0.386372	0.172382	0.344618	0.227576	-0.0544291	0.853384	0.0599601	0.838655
CCDC92	black	0.555349	0.0392404	0.36763	0.195955	0.367505	0.196119	-0.0819035	0.780744	0.00177667	0.995191	0.571374	0.0328081	-0.240913	0.40671	-0.535993	0.0481938	0.441045	0.114431	0.242527	0.403477	-0.288717	0.31678	-0.0559867	0.849231
DAP	black	0.551011	0.0411311	0.205633	0.480644	0.394333	0.162952	-0.126805	0.665758	0.0729048	0.804382	0.674733	0.00811674	-0.169883	0.561492	-0.371172	0.191351	0.303094	0.292167	0.48866	0.0762184	-0.555359	0.0392363	0.173317	0.553485
CYSLTR2	black	0.549571	0.041773	-0.363942	0.200825	0.671667	0.00852249	-0.642513	0.0132126	0.323656	0.258971	0.712939	0.00420819	0.393894	0.163463	0.256534	0.375984	-0.291825	0.311364	0.303889	0.290839	-0.278156	0.335588	0.0337355	0.90885
PXN	black	0.544938	0.0438885	-0.0355703	0.903913	0.631394	0.0154447	-0.444001	0.111739	-0.121781	0.678341	0.846806	0.000133026	0.0976739	0.73975	0.0423556	0.885684	-0.166852	0.568598	0.266497	0.357058	-0.233331	0.422077	-0.431012	0.123895
MED15	black	0.539673	0.046387	-0.0532534	0.856521	0.387084	0.171525	-0.204223	0.483724	0.0703631	0.811087	0.835695	0.00019741	-0.00363927	0.990149	-0.247753	0.3931	0.203645	0.484988	0.420709	0.134149	-0.453601	0.103299	0.0901198	0.759313
MCTP2	black	0.501813	0.0674976	-0.227512	0.43407	0.540995	0.04575	-0.473403	0.0872995	0.257786	0.373575	0.820248	0.000326664	0.182214	0.532974	0.184817	0.527037	-0.247325	0.393945	0.425029	0.129783	-0.179452	0.539307	0.0353032	0.904631
MAGED4	black	0.488795	0.0761255	-0.435051	0.120023	0.621822	0.0175869	-0.629377	0.0158787	0.0940174	0.749202	0.750243	0.00199569	0.490019	0.0752821	0.32411	0.258265	-0.357964	0.208877	0.144095	0.623098	-0.138792	0.636072	-0.255213	0.378533
RNF216	black	0.459779	0.0981061	0.410487	0.144872	0.396921	0.159961	-0.0528472	0.857605	-0.0618749	0.833567	0.585431	0.0278406	-0.388926	0.169319	-0.307393	0.285031	0.181148	0.535414	0.472517	0.0879758	-0.333382	0.244097	-0.0307773	0.916816
SHE	black	0.459213	0.0985743	-0.546606	0.0431182	0.527848	0.0523741	-0.649822	0.0118858	0.382085	0.177603	0.739528	0.00250313	0.496437	0.0709714	0.402472	0.153667	-0.42096	0.133894	0.126646	0.666155	0.242842	0.402846	-0.0739191	0.801709
TMEM104	black	0.454495	0.102536	-0.165533	0.571702	0.51845	0.0575166	-0.339816	0.234551	-0.141055	0.630524	0.927147	1.84248e-06	0.0818534	0.780875	0.117139	0.690035	-0.200572	0.491742	0.477721	0.0840558	-0.481289	0.0814401	-0.168103	0.565659
CIZ1	black	0.453413	0.10346	-0.480591	0.0819471	0.392037	0.165637	-0.44711	0.108956	0.239435	0.409682	0.8642	6.71477e-05	0.381788	0.177969	0.147971	0.613677	-0.146011	0.618435	0.260707	0.367992	-0.142531	0.626915	0.064305	0.827118
MTHFR	black	0.452644	0.10412	0.0449461	0.878738	0.451385	0.105207	-0.322534	0.260722	-0.130202	0.657297	0.656779	0.0107204	0.0823683	0.779527	-0.116613	0.691364	0.0144735	0.960833	0.0816051	0.781525	-0.121381	0.679346	-0.431171	0.12374
LRP5	black	0.448313	0.107892	-0.409198	0.146264	0.575987	0.0311107	-0.565397	0.0351079	0.318761	0.266658	0.870892	5.03408e-05	0.290426	0.313795	0.466643	0.0925517	-0.517427	0.0580975	0.481101	0.0815762	-0.040993	0.889341	0.11839	0.686876
GRAMD1B	black	0.446199	0.109767	-0.150688	0.607106	0.368326	0.195046	-0.283851	0.325372	0.213421	0.463801	0.767933	0.00133913	0.0714959	0.808097	0.00191392	0.994819	-0.0461245	0.875581	0.479503	0.082742	-0.312085	0.27736	0.193788	0.506804
CHFR	black	0.43932	0.116021	0.0674543	0.818776	0.399389	0.157143	-0.190132	0.515006	-0.209365	0.472537	0.864707	6.57333e-05	-0.0900853	0.759403	-0.110239	0.707535	-0.00999506	0.972948	0.38626	0.172516	-0.332704	0.245117	-0.349978	0.219946
POM121C	black	0.436848	0.118327	-0.0691373	0.814326	0.263759	0.362206	-0.179501	0.539194	0.280969	0.330519	0.727501	0.00318884	-0.000895214	0.997577	-0.134309	0.647118	0.102174	0.728165	0.453032	0.103786	-0.230401	0.428095	0.3424	0.230782
DCTN1	black	0.43343	0.121567	-0.200273	0.492401	0.493188	0.0731309	-0.374942	0.186527	-0.120242	0.682209	0.925552	2.09066e-06	0.129186	0.659824	0.146336	0.617644	-0.244879	0.398788	0.333977	0.243204	-0.216075	0.458126	-0.35607	0.21147
FRY	black	0.430945	0.12396	0.177699	0.543342	0.3756	0.185693	-0.154251	0.598533	0.21545	0.459461	0.596553	0.0243267	-0.191789	0.51128	-0.100591	0.732234	0.0280609	0.924138	0.627876	0.0162075	-0.446148	0.109812	0.301321	0.295141
PHF8	black	0.426589	0.12823	-0.614953	0.019258	0.57842	0.0302421	-0.635708	0.014547	0.314488	0.273479	0.750009	0.00200581	0.504131	0.0660376	0.455752	0.10147	-0.450259	0.106186	0.299216	0.298693	-0.176543	0.546009	0.132436	0.651754
SLC8B1	black	0.41639	0.138613	-0.116816	0.690852	0.504082	0.0660685	-0.350168	0.219678	-0.180665	0.536521	0.829783	0.000240764	0.074258	0.800816	0.10489	0.721197	-0.213834	0.462916	0.288055	0.317942	-0.227342	0.434422	-0.341876	0.231543
ZSCAN5A	black	0.412051	0.143196	-0.503891	0.0661879	0.521348	0.0558935	-0.590581	0.0261692	0.0479908	0.870585	0.679164	0.00755691	0.539236	0.0465989	0.254365	0.380174	-0.282255	0.328217	-0.0207294	0.943925	-0.0749554	0.798981	-0.304458	0.289892
CHST15	black	0.398863	0.15774	0.102515	0.727288	0.499393	0.0690458	-0.335479	0.24096	-0.154439	0.598082	0.702936	0.00504499	-0.0154446	0.958208	0.0944153	0.748172	-0.237892	0.412797	0.257253	0.3746	-0.0881331	0.764481	-0.463617	0.0949725
COL4A6	black	0.398591	0.15805	-0.324992	0.256897	0.422137	0.132695	-0.39211	0.165551	0.0756818	0.797069	0.888443	2.17932e-05	0.212887	0.464946	0.240502	0.407536	-0.301411	0.29499	0.347918	0.222859	-0.0561213	0.848872	-0.145567	0.619513
FLT4	black	0.395751	0.161309	-0.640198	0.0136557	0.555881	0.0390131	-0.655303	0.0109599	0.176702	0.545641	0.846887	0.000132626	0.545167	0.0437821	0.526239	0.0532298	-0.548896	0.0420766	0.228247	0.432546	-0.0467336	0.87395	-0.145956	0.618567
AKAP17A	black	0.364153	0.200544	0.0753301	0.797995	0.24501	0.398528	-0.0776953	0.791777	-0.0885096	0.763501	0.8055	0.000506722	-0.141779	0.628751	-0.139195	0.635084	0.0491184	0.867568	0.491419	0.0743268	-0.37329	0.188632	-0.0671716	0.819524
PAR-Y-AKAP17A	black	0.364153	0.200544	0.0753301	0.797995	0.24501	0.398528	-0.0776953	0.791777	-0.0885096	0.763501	0.8055	0.000506722	-0.141779	0.628751	-0.139195	0.635084	0.0491184	0.867568	0.491419	0.0743268	-0.37329	0.188632	-0.0671716	0.819524
RRBP1	black	0.364019	0.200721	0.496189	0.0711343	0.241295	0.405943	0.108824	0.711143	0.018166	0.950851	0.524236	0.0543094	-0.525614	0.0535648	-0.317851	0.268103	0.20646	0.478841	0.695086	0.00578837	-0.479092	0.0830436	0.301095	0.29552
SH3GL1	black	0.36331	0.201666	-0.448119	0.108063	0.442746	0.112877	-0.44621	0.109757	-0.00647323	0.982478	0.95826	6.97634e-08	0.313344	0.275323	0.356069	0.211471	-0.409859	0.145548	0.386077	0.172737	-0.228963	0.431062	-0.143234	0.625198
DHX38	black	0.350855	0.218713	-0.476685	0.0848259	0.345984	0.225617	-0.435915	0.119206	0.124228	0.672201	0.720409	0.0036576	0.405656	0.150132	0.243625	0.401284	-0.252852	0.383111	0.0996099	0.734759	0.102917	0.726257	-0.0465608	0.874413
SPG7	black	0.349451	0.22069	-0.0475597	0.871738	0.229699	0.429543	-0.0637374	0.828623	-0.238833	0.410897	0.796049	0.000658982	-0.0553893	0.850823	-0.213496	0.46364	0.148227	0.613057	0.32519	0.25659	-0.432054	0.122887	-0.124559	0.671372
MED26	black	0.345226	0.226703	0.0754564	0.797662	0.281498	0.32957	-0.117935	0.688025	-0.0546022	0.852922	0.624047	0.0170701	-0.0464734	0.874647	-0.163654	0.576136	0.106774	0.716377	0.407574	0.148029	-0.546025	0.0433852	0.190924	0.513225
RANBP10	black	0.336347	0.239669	-0.204147	0.48389	0.412714	0.142489	-0.278349	0.33524	-0.023819	0.935582	0.819954	0.000329651	0.0255141	0.931007	0.212844	0.465039	-0.286171	0.32126	0.520392	0.0564253	-0.342444	0.230718	0.03583	0.903214
BEND7	black	0.325204	0.256568	-0.305713	0.287808	0.455305	0.101848	-0.470168	0.0897857	0.293252	0.308893	0.587017	0.0273177	0.286255	0.321112	0.376526	0.184524	-0.404902	0.150965	0.327651	0.252797	-0.101451	0.730023	0.12687	0.665597
PLEKHG5	black	0.320956	0.263194	0.0577196	0.844615	0.40512	0.150724	-0.187199	0.521629	-0.412541	0.142674	0.673699	0.00825189	-0.0374169	0.898947	0.00185584	0.994976	-0.116054	0.692778	0.24206	0.404412	-0.363175	0.201846	-0.524908	0.0539454
UBIAD1	black	0.320815	0.263417	-0.175398	0.548659	0.42155	0.133292	-0.332879	0.244852	-0.194676	0.50482	0.671868	0.00849535	0.194221	0.505837	0.128158	0.662384	-0.202329	0.487876	0.190634	0.513877	-0.316075	0.270935	-0.317961	0.267928
FOXO3B	black	0.312445	0.276777	-0.231491	0.425852	0.429285	0.125575	-0.419548	0.13534	0.224957	0.439388	0.560401	0.0371204	0.19041	0.514381	0.338495	0.236491	-0.38505	0.173981	0.307524	0.284815	-0.0130546	0.964671	0.109102	0.710434
DMWD	black	0.300204	0.297023	-0.23699	0.414624	0.211325	0.468306	-0.137473	0.639316	0.00258908	0.992991	0.779435	0.00101413	0.0899998	0.759625	-0.00650413	0.982394	-0.0036443	0.990135	0.436518	0.118638	-0.459435	0.0983902	0.244835	0.398876
HID1	black	0.276456	0.338674	-0.197975	0.497482	0.25667	0.375723	-0.213907	0.46276	-0.354373	0.213811	0.791609	0.000742172	0.164321	0.574559	-0.00212163	0.994257	-0.0786689	0.789221	0.0752784	0.798131	-0.174463	0.550825	-0.562514	0.0362593
CLPTM1	black	0.273102	0.344804	-0.4488	0.107464	0.450498	0.105978	-0.438398	0.116878	0.0497685	0.86583	0.808161	0.000469416	0.291937	0.311168	0.484184	0.0793601	-0.518795	0.0573219	0.48569	0.0782933	-0.367031	0.196741	0.0543341	0.853637
DHX37	black	0.271828	0.347151	-0.718661	0.00378101	0.395291	0.16184	-0.533089	0.0496549	0.121917	0.677998	0.788272	0.000810059	0.554034	0.0398065	0.522734	0.0551291	-0.508639	0.0632639	0.197336	0.4989	-0.0695583	0.813213	-0.0758296	0.796681
NCLN	black	0.266888	0.356327	-0.381814	0.177936	0.25226	0.384264	-0.21978	0.450264	-0.197651	0.498202	0.857453	8.84581e-05	0.204672	0.482742	0.119641	0.683722	-0.15483	0.597144	0.26875	0.352852	-0.29911	0.298874	-0.179486	0.539228
PPM1F	black	0.26629	0.357446	-0.155686	0.595093	0.300864	0.29591	-0.24942	0.389818	-0.396078	0.160932	0.727227	0.00320604	0.16704	0.568155	0.0611714	0.835435	-0.157338	0.591141	0.0161959	0.956176	-0.0775432	0.792177	-0.68318	0.00707595
AKAP8	black	0.262598	0.364402	-0.682238	0.00718655	0.407486	0.148125	-0.585823	0.0277105	0.246132	0.396303	0.677084	0.00781584	0.55576	0.0390647	0.621141	0.0177475	-0.61538	0.0191508	0.15407	0.598966	0.20597	0.479909	-0.0963511	0.743166
STARD7-AS1	black	0.259177	0.370911	-0.395394	0.161722	0.400069	0.156371	-0.391876	0.165826	0.0270298	0.926918	0.799549	0.000598827	0.265917	0.358145	0.42703	0.127792	-0.473368	0.0873261	0.433285	0.121705	-0.265921	0.358138	-0.0227574	0.938448
GAK	black	0.256119	0.376784	0.16639	0.569683	0.254218	0.380459	0.028404	0.923213	-0.379556	0.18073	0.831199	0.000229738	-0.31452	0.273428	-0.0642081	0.827375	-0.0665595	0.821145	0.60387	0.0222039	-0.545448	0.0436521	-0.217906	0.454233
ALG12	black	0.247881	0.392846	-0.274172	0.342842	0.240245	0.408052	-0.189565	0.516284	-0.068091	0.817092	0.867697	5.78754e-05	0.0959401	0.744228	0.200858	0.491112	-0.243819	0.400898	0.543162	0.04472	-0.423271	0.131548	0.100842	0.731589
SLC4A2	black	0.238947	0.410667	-0.463577	0.0950052	0.237175	0.414249	-0.229791	0.429353	0.109057	0.710548	0.851626	0.000111018	0.1868	0.522534	0.277292	0.337155	-0.275735	0.339987	0.551886	0.0407441	-0.399417	0.15711	0.280669	0.331059
CLASRP	black	0.236096	0.416439	0.123172	0.67485	0.252793	0.383227	-0.0124392	0.966335	-0.413564	0.141587	0.776993	0.00107719	-0.223274	0.442908	-0.0169483	0.954142	-0.105251	0.720275	0.507693	0.0638389	-0.510763	0.0619863	-0.317599	0.268504
NCKAP5L	black	0.231536	0.425759	-0.228327	0.432379	0.284443	0.324319	-0.172966	0.554301	-0.0172612	0.953297	0.671215	0.00858358	0.0598702	0.838894	0.152923	0.601722	-0.177178	0.544544	0.546295	0.043261	-0.635865	0.0145153	0.255839	0.377323
AP1B1	black	0.229325	0.430314	-0.275049	0.341238	0.18632	0.523622	-0.19556	0.502849	-0.26579	0.358384	0.791318	0.000747902	0.192561	0.509549	0.0515037	0.861192	-0.1098	0.708656	0.122783	0.675825	-0.15715	0.591589	-0.41592	0.139104
RNF40	black	0.226041	0.437127	-0.655294	0.0109616	0.349367	0.220808	-0.461322	0.096838	0.11261	0.701506	0.847653	0.000128919	0.415294	0.139761	0.555869	0.039018	-0.568555	0.0338783	0.316504	0.270248	-0.00567153	0.984648	-0.0454934	0.877272
LRRC3	black	0.220769	0.448176	-0.21454	0.461404	0.44386	0.111867	-0.376127	0.185027	-0.33119	0.247402	0.425569	0.129244	0.292621	0.309985	0.234086	0.420534	-0.296494	0.303324	-0.0617254	0.833964	-0.200991	0.490819	-0.61162	0.0201108
PNPLA6	black	0.210413	0.470272	-0.0213767	0.942177	0.153172	0.601123	0.0451495	0.878193	-0.443653	0.112055	0.761176	0.00156564	-0.118828	0.685771	-0.162507	0.578848	0.0934909	0.750566	0.447529	0.108585	-0.775722	0.00111126	-0.200946	0.490917
PPP2R5D	black	0.20365	0.484978	-0.450356	0.106102	0.212643	0.46547	-0.248735	0.391166	-0.114304	0.69721	0.83821	0.000180995	0.223156	0.443156	0.23953	0.409491	-0.27855	0.334876	0.262711	0.364188	-0.139956	0.633217	-0.216287	0.457675
TOP3B	black	0.190217	0.514815	0.0761141	0.795932	0.209733	0.471741	-0.00972376	0.973682	-0.226059	0.43709	0.643725	0.0129852	-0.224164	0.441045	0.0888108	0.762717	-0.181584	0.534417	0.496706	0.0707946	-0.247156	0.394278	-0.139847	0.633485
EHMT1	black	0.173827	0.552302	-0.618486	0.018384	0.310759	0.279515	-0.423706	0.131109	0.148846	0.611558	0.815766	0.000374782	0.370667	0.192004	0.633031	0.0150993	-0.642207	0.0132706	0.422477	0.13235	-0.0211964	0.942664	0.0524748	0.858599
MAN2B1	black	0.171613	0.557453	-0.158851	0.587533	0.10173	0.729305	0.0237334	0.935813	-0.220487	0.448771	0.856109	9.3298e-05	-0.0905882	0.758096	0.0311943	0.915693	-0.0795069	0.787023	0.605943	0.0216286	-0.601495	0.022877	0.0395744	0.89315
SCAMP4	black	0.152864	0.601864	-0.520418	0.056411	0.227828	0.433413	-0.262994	0.363652	-0.300296	0.296867	0.777589	0.00106154	0.339863	0.234481	0.279017	0.334032	-0.292073	0.310934	0.182762	0.531723	-0.357069	0.2101	-0.283342	0.326277
SPPL2B	black	0.147236	0.615458	-0.27358	0.343928	0.142882	0.626057	-0.0801249	0.785402	-0.433642	0.121364	0.734531	0.00277222	0.130715	0.656022	0.0279204	0.924517	-0.0655786	0.823742	0.221026	0.447634	-0.506641	0.0644827	-0.284226	0.324705
TAOK2	black	0.14062	0.631589	-0.617391	0.0186518	0.187961	0.519906	-0.315446	0.271941	0.110583	0.70666	0.826586	0.000267233	0.345345	0.226533	0.476311	0.0851051	-0.476029	0.0853164	0.4079	0.147674	-0.13982	0.63355	0.133995	0.647894
CD276	black	0.139534	0.634252	-0.0451151	0.878285	0.0648118	0.825775	0.0775174	0.792244	-0.416223	0.138787	0.74191	0.00238238	-0.0848404	0.773066	-0.0977654	0.739514	0.0456694	0.8768	0.423809	0.131006	-0.654072	0.011163	-0.114461	0.696812
SLC22A23	black	0.123515	0.673989	-0.46434	0.0943899	0.266332	0.357366	-0.333718	0.243593	0.254593	0.379731	0.535129	0.0486251	0.284967	0.32339	0.504992	0.065501	-0.493834	0.0726978	0.471291	0.0889175	-0.285311	0.32278	0.333835	0.243418
PRKCSH	black	0.116897	0.690646	0.152014	0.603909	-0.0461206	0.875591	0.228001	0.433055	-0.0550014	0.851857	0.626231	0.016574	-0.385562	0.17336	-0.132734	0.651015	0.0766121	0.794623	0.727517	0.00318781	-0.503078	0.0666982	0.391305	0.166497
ALDH4A1	black	0.113885	0.698272	-0.0583608	0.842909	0.0928563	0.75221	-0.0139012	0.962381	-0.495933	0.0713035	0.593734	0.0251838	0.0150697	0.959221	-0.0982293	0.738317	0.01581	0.95722	0.0364052	0.901667	-0.257251	0.374605	-0.614273	0.0194296
LZTR1	black	0.0695505	0.813234	0.0308696	0.916568	0.131574	0.653892	0.0542704	0.853807	-0.526182	0.0532602	0.728781	0.0031095	-0.201897	0.488826	0.112506	0.701771	-0.223367	0.442714	0.425875	0.128939	-0.365167	0.199199	-0.415665	0.139372
TKT	black	0.0616576	0.834144	0.0414498	0.888115	-0.098906	0.736573	0.16123	0.581875	-0.0211497	0.94279	0.532216	0.0501006	-0.244816	0.398913	-0.0668102	0.820481	0.0125431	0.966054	0.47399	0.0868534	-0.162015	0.580014	0.145583	0.619475
CCDC3	blue	-0.967131	1.69593e-08	-0.0120379	0.967421	-0.828117	0.000254283	0.698214	0.00548257	-0.611905	0.0200367	-0.399554	0.156955	-0.385461	0.173483	0.471416	0.0888206	-0.470455	0.0895632	0.20097	0.490865	-0.0293941	0.920544	-0.100552	0.732334
VWA5A	blue	-0.965405	2.2969e-08	-0.00947543	0.974354	-0.832753	0.000218113	0.707409	0.00465609	-0.62685	0.0164353	-0.392339	0.165281	-0.362314	0.202998	0.454455	0.10257	-0.444172	0.111585	0.200437	0.49204	-0.0847951	0.773184	-0.0947905	0.747201
C3orf18	blue	-0.964537	2.65997e-08	0.0330114	0.910799	-0.931407	1.29558e-06	0.81342	0.000402168	-0.589919	0.0263799	-0.422353	0.132476	-0.440854	0.114606	0.305373	0.288372	-0.28007	0.332135	0.183844	0.529252	-0.0383253	0.896506	0.0280963	0.924042
DNASE2	blue	-0.963479	3.16626e-08	0.0859081	0.770279	-0.906905	7.66996e-06	0.815171	0.000381584	-0.536748	0.0478189	-0.461801	0.0964467	-0.507793	0.063778	0.325373	0.256307	-0.308088	0.283887	0.234922	0.418828	-0.0169077	0.954252	0.079643	0.786666
IL27RA	blue	-0.960501	5.03491e-08	-0.0128204	0.965304	-0.938373	6.919e-07	0.782325	0.000943332	-0.42344	0.131377	-0.394106	0.163216	-0.420766	0.134091	0.380941	0.179013	-0.344341	0.227975	0.275215	0.340936	0.0134913	0.96349	0.20976	0.471682
ERRFI1	blue	-0.955737	9.86733e-08	0.117969	0.687938	-0.809002	0.000458086	0.741477	0.002404	-0.609477	0.0206739	-0.409956	0.145444	-0.499738	0.0688233	0.443254	0.112415	-0.458129	0.0994747	0.291921	0.311196	-0.0738182	0.801975	-0.0630258	0.830511
PLEKHA6	blue	-0.952852	1.43208e-07	-0.0370249	0.900001	-0.917483	3.80806e-06	0.754802	0.00180623	-0.429005	0.125849	-0.363611	0.201265	-0.397411	0.159399	0.412822	0.142374	-0.37798	0.182697	0.297647	0.301357	-0.0255441	0.930926	0.179423	0.539373
ABTB1	blue	-0.946838	2.90457e-07	0.00306054	0.991715	-0.931075	1.33269e-06	0.801211	0.00057185	-0.497688	0.0701514	-0.306679	0.286209	-0.443617	0.112086	0.358719	0.207849	-0.331823	0.246445	0.323143	0.25977	-0.0798739	0.78606	0.159685	0.585547
C2CD4A	blue	-0.945146	3.49243e-07	0.203022	0.486355	-0.875771	4.0394e-05	0.836539	0.000191769	-0.63795	0.0140966	-0.479267	0.0829151	-0.543217	0.0446944	0.242246	0.404039	-0.242162	0.404206	0.267909	0.354419	-0.245376	0.397802	0.00593981	0.983922
FBXL20	blue	-0.944916	3.5793e-07	0.00763317	0.979339	-0.832624	0.000219063	0.716265	0.00395551	-0.425896	0.128918	-0.544229	0.044219	-0.390734	0.167173	0.398933	0.15766	-0.358689	0.207889	0.207755	0.476026	-0.0632518	0.829912	0.163569	0.576336
INPP5K	blue	-0.94176	4.96572e-07	-0.100118	0.73345	-0.93107	1.33322e-06	0.758946	0.00164671	-0.403297	0.152746	-0.4757	0.0855627	-0.320496	0.263918	0.306554	0.286415	-0.232035	0.424734	0.174199	0.551438	-0.106713	0.716534	0.236861	0.414885
GPC6	blue	-0.9378	7.30516e-07	0.0852086	0.772105	-0.776757	0.00108345	0.711317	0.00433586	-0.520092	0.0565927	-0.402327	0.15383	-0.494368	0.0723415	0.501604	0.0676304	-0.507247	0.0641109	0.366248	0.197772	-0.0761175	0.795923	0.0869975	0.767439
PDLIM3	blue	-0.932476	1.18187e-06	-0.158391	0.58863	-0.894994	1.53811e-05	0.713058	0.00419892	-0.509451	0.0627732	-0.349749	0.220268	-0.26328	0.363112	0.389683	0.168417	-0.328734	0.251139	0.203734	0.484794	-0.143525	0.624487	0.12539	0.669293
MEST	blue	-0.929353	1.53955e-06	-0.254899	0.37914	-0.80151	0.000567101	0.566068	0.034844	-0.387059	0.171554	-0.261834	0.36585	-0.193962	0.506415	0.637752	0.0141359	-0.598755	0.0236725	0.258299	0.372592	0.0594967	0.839887	0.102383	0.727628
SEZ6L2	blue	-0.928835	1.6066e-06	0.0131543	0.964401	-0.94432	3.81339e-07	0.822241	0.000306928	-0.43182	0.123113	-0.381392	0.178456	-0.443152	0.112508	0.277053	0.337588	-0.227949	0.433163	0.317355	0.268892	-0.15403	0.599063	0.304885	0.289181
KLHDC2	blue	-0.928188	1.69393e-06	-0.0557154	0.849954	-0.882337	2.95957e-05	0.673354	0.00829727	-0.37575	0.185504	-0.619714	0.0180876	-0.242491	0.403548	0.340062	0.23419	-0.268398	0.353508	-0.00849668	0.977002	0.118792	0.685863	0.150193	0.6083
RGS4	blue	-0.927748	1.75543e-06	-0.0588521	0.841601	-0.889883	2.0224e-05	0.716469	0.00394047	-0.488265	0.0764918	-0.529005	0.0517644	-0.292578	0.310058	0.294922	0.306017	-0.237457	0.413678	0.0600449	0.838429	-0.0502227	0.864615	0.0481417	0.870181
KCTD9	blue	-0.927507	1.78991e-06	0.0460552	0.875767	-0.869477	5.35711e-05	0.722714	0.00349968	-0.406629	0.149063	-0.525006	0.0538923	-0.380643	0.179382	0.357278	0.209814	-0.325262	0.256479	0.14399	0.623352	0.0903734	0.758654	0.105458	0.719744
MFAP2	blue	-0.925932	2.02915e-06	-0.022731	0.93852	-0.892432	1.76729e-05	0.739468	0.00250625	-0.395565	0.161524	-0.49286	0.0733516	-0.361833	0.203642	0.339579	0.234897	-0.278644	0.334707	0.218652	0.45265	-0.0882341	0.764218	0.259599	0.370105
HPSE	blue	-0.925661	2.07285e-06	-0.292993	0.309341	-0.807045	0.000484773	0.541589	0.0454663	-0.36289	0.202226	-0.497924	0.0699982	-0.0878186	0.7653	0.528618	0.0519677	-0.451237	0.105335	-0.0130392	0.964712	0.142015	0.628174	0.0231026	0.937516
MME	blue	-0.924784	2.21975e-06	-0.231139	0.426575	-0.77345	0.00117423	0.577566	0.0305448	-0.396251	0.160732	-0.259658	0.369993	-0.240157	0.408229	0.650078	0.0118413	-0.617814	0.0185479	0.303246	0.291913	0.0312798	0.915462	0.096165	0.743646
GABARAPL1	blue	-0.924122	2.33624e-06	-0.12209	0.677563	-0.78649	0.000848304	0.608991	0.0208032	-0.358385	0.208303	-0.471286	0.0889207	-0.25862	0.371978	0.518834	0.0572995	-0.468377	0.0911838	0.232312	0.424165	-0.0807476	0.783771	0.210694	0.469666
TXNRD3	blue	-0.924066	2.34625e-06	0.142223	0.627667	-0.811863	0.000421202	0.775297	0.00112282	-0.595371	0.0246833	-0.421143	0.133706	-0.525803	0.0534637	0.354267	0.213956	-0.363073	0.201982	0.296739	0.302906	-0.135942	0.643086	-0.0343007	0.907329
DGKA	blue	-0.922132	2.71683e-06	0.229324	0.430317	-0.802597	0.000550114	0.781744	0.000957233	-0.561933	0.0364946	-0.421769	0.133068	-0.60504	0.0218777	0.384083	0.175157	-0.409815	0.145596	0.342715	0.230325	-0.0159524	0.956835	0.0192353	0.947961
ATG13	blue	-0.920947	2.96663e-06	-0.155765	0.594903	-0.782592	0.000936999	0.662615	0.0098123	-0.523048	0.054957	-0.276313	0.338933	-0.321695	0.262035	0.522281	0.0553781	-0.49107	0.0745638	0.339245	0.235387	-0.200089	0.492807	0.0833398	0.776987
TMCC3	blue	-0.920806	2.99757e-06	-0.153306	0.600801	-0.713652	0.00415301	0.545837	0.0434722	-0.430161	0.124721	-0.313438	0.275172	-0.26858	0.353169	0.682184	0.0071929	-0.668584	0.00894605	0.298668	0.299623	0.0322164	0.91294	0.037808	0.897896
ABHD14B	blue	-0.919134	3.3854e-06	0.0748473	0.799265	-0.982562	3.91066e-10	0.852225	0.000108504	-0.494533	0.0722317	-0.4687	0.0909303	-0.438495	0.116788	0.12247	0.676611	-0.0792852	0.787604	0.138106	0.637759	-0.0842713	0.774552	0.156679	0.592717
TPM2	blue	-0.91877	3.47508e-06	-0.196338	0.501118	-0.820425	0.000324871	0.620554	0.0178869	-0.427406	0.127421	-0.306233	0.286946	-0.254284	0.38033	0.553223	0.0401589	-0.510316	0.0622532	0.233829	0.42106	0.0643867	0.826902	0.131882	0.653127
MARVELD1	blue	-0.918135	3.63623e-06	-0.225402	0.43846	-0.818841	0.000341195	0.634533	0.0147875	-0.425521	0.129291	-0.280495	0.33137	-0.24546	0.397635	0.546872	0.042996	-0.493852	0.0726859	0.268115	0.354034	-0.0203562	0.944933	0.169029	0.56349
APOBEC3C	blue	-0.917675	3.7568e-06	-0.191535	0.511851	-0.888668	2.15417e-05	0.666788	0.00920018	-0.51955	0.0568969	-0.295866	0.304399	-0.225879	0.437464	0.40625	0.149479	-0.365332	0.19898	0.0803305	0.784864	0.101363	0.730248	-0.0665906	0.821062
ERBB2	blue	-0.917188	3.88782e-06	-0.338125	0.237036	-0.808791	0.000460901	0.549086	0.0419909	-0.324762	0.257253	-0.314192	0.273957	-0.122878	0.675586	0.618069	0.0184856	-0.548659	0.0421834	0.187263	0.521484	0.0895217	0.760868	0.168894	0.563806
ORAI3	blue	-0.916776	4.00162e-06	0.124601	0.671269	-0.943149	4.30936e-07	0.821079	0.000318309	-0.63818	0.014051	-0.484501	0.0791347	-0.39913	0.157437	0.114897	0.695706	-0.0862862	0.769293	0.0302985	0.918106	-0.0976019	0.739936	-0.0601136	0.838246
KLHL13	blue	-0.915631	4.3327e-06	-0.022673	0.938676	-0.726966	0.00322245	0.604277	0.02209	-0.430346	0.12454	-0.425707	0.129106	-0.356012	0.21155	0.568041	0.0340763	-0.556045	0.0389432	0.302779	0.292694	-0.0563562	0.848247	0.0916889	0.755238
HEY1	blue	-0.915442	4.38916e-06	-0.236654	0.415306	-0.899225	1.2132e-05	0.643794	0.0129723	-0.48044	0.0820569	-0.453402	0.103469	-0.110548	0.706749	0.311262	0.278696	-0.228876	0.431242	-0.0625863	0.831678	-0.0200417	0.945783	0.00532616	0.985583
HBP1	blue	-0.914903	4.55454e-06	-0.189294	0.516894	-0.717641	0.00385456	0.541326	0.0455918	-0.487075	0.0773207	-0.345483	0.226335	-0.202371	0.487784	0.61809	0.0184806	-0.589119	0.0266359	0.214937	0.460556	-0.0690851	0.814464	-0.0339968	0.908147
STBD1	blue	-0.914431	4.70305e-06	0.102334	0.727754	-0.854352	9.99464e-05	0.781633	0.000959898	-0.604616	0.0219954	-0.349222	0.221012	-0.460631	0.0974044	0.308852	0.282633	-0.302263	0.293559	0.334877	0.241858	-0.283446	0.326091	0.0812796	0.782377
NIPAL3	blue	-0.9138	4.90815e-06	-0.132285	0.652128	-0.779223	0.00101948	0.660708	0.0101023	-0.470083	0.0898523	-0.173616	0.552792	-0.377057	0.183855	0.572154	0.0325163	-0.558891	0.0377451	0.484634	0.0790403	-0.217811	0.454434	0.191752	0.511363
C1QTNF6	blue	-0.912242	5.44653e-06	-0.375106	0.186319	-0.822584	0.000303627	0.545068	0.0438283	-0.397101	0.159754	-0.254843	0.379249	-0.078972	0.788426	0.5875	0.0271597	-0.519825	0.0567425	0.156087	0.594132	0.0306435	0.917177	0.0785616	0.789503
ARPIN	blue	-0.909957	6.32225e-06	0.295035	0.305823	-0.918143	3.6341e-06	0.894264	1.60078e-05	-0.627459	0.0163	-0.467811	0.0916291	-0.634452	0.0148043	0.0984141	0.737841	-0.113464	0.69934	0.218209	0.45359	-0.120666	0.681142	-0.0127285	0.965553
TMEM35A	blue	-0.909148	6.65918e-06	-0.00682448	0.981527	-0.796596	0.000649283	0.720819	0.00362912	-0.527071	0.052786	-0.384934	0.174121	-0.415626	0.139413	0.400058	0.156384	-0.371393	0.191066	0.347263	0.223791	-0.275664	0.340116	0.16756	0.566934
SOX8	blue	-0.908991	6.72615e-06	0.0418008	0.887173	-0.831525	0.000227261	0.742535	0.00235145	-0.347739	0.223115	-0.401429	0.154837	-0.47305	0.0875679	0.415274	0.139782	-0.384354	0.174827	0.429781	0.125091	-0.15046	0.607657	0.396101	0.160905
NECAB3	blue	-0.907728	7.28529e-06	0.0358129	0.90326	-0.935791	8.80133e-07	0.848361	0.000125568	-0.553616	0.039988	-0.272501	0.345911	-0.485353	0.0785306	0.222872	0.443751	-0.199467	0.49418	0.365858	0.198285	-0.276806	0.338036	0.180905	0.535971
ADCY7	blue	-0.90639	7.91884e-06	-0.0303827	0.917879	-0.835512	0.000198648	0.757242	0.00171089	-0.538659	0.0468796	-0.343784	0.228779	-0.412051	0.143196	0.352022	0.217079	-0.312892	0.276053	0.296583	0.303173	-0.212133	0.466567	0.10848	0.712021
FAXDC2	blue	-0.905224	8.50746e-06	0.186758	0.522629	-0.864686	6.57902e-05	0.790004	0.000774228	-0.545505	0.0436257	-0.50128	0.0678361	-0.495227	0.0717704	0.190623	0.513902	-0.189185	0.51714	0.178776	0.54086	-0.144275	0.62266	-0.00633787	0.982844
NDST3	blue	-0.904851	8.70308e-06	0.128982	0.660333	-0.790702	0.000760161	0.674797	0.0081084	-0.398996	0.157588	-0.490659	0.0748446	-0.458579	0.0990999	0.422213	0.132618	-0.425614	0.129198	0.214988	0.460446	0.125871	0.668092	0.040502	0.890659
SDC4	blue	-0.90422	9.04278e-06	-0.252554	0.383691	-0.812769	0.000410045	0.61039	0.0204326	-0.436863	0.118313	-0.291255	0.312352	-0.190096	0.515087	0.51499	0.0594985	-0.462027	0.0962623	0.193543	0.507352	-0.0132023	0.964271	0.0918267	0.754881
P3H3	blue	-0.903604	9.38401e-06	-0.0465896	0.874336	-0.862471	7.21597e-05	0.739854	0.00248631	-0.519645	0.0568431	-0.201861	0.488903	-0.422446	0.132382	0.43361	0.121395	-0.420818	0.134038	0.351566	0.217717	-0.0155252	0.95799	0.0898678	0.759968
CHMP1B	blue	-0.90265	9.93431e-06	-0.19217	0.510425	-0.870143	5.20318e-05	0.659227	0.010332	-0.494698	0.0721214	-0.479627	0.0826508	-0.148384	0.612677	0.295108	0.305698	-0.208911	0.473518	-0.0104954	0.971594	-0.125019	0.670222	0.0595219	0.83982
FGF14-AS2	blue	-0.901874	1.04012e-05	-0.133451	0.64924	-0.831272	0.000229183	0.600033	0.0232989	-0.490905	0.0746764	-0.519397	0.0569828	-0.155817	0.594777	0.380962	0.178988	-0.329783	0.249539	-0.0940058	0.749232	0.149025	0.611125	-0.149088	0.610973
AC026471.1	blue	-0.901795	1.04494e-05	0.00116124	0.996856	-0.864282	6.69187e-05	0.72409	0.003408	-0.625582	0.0167202	-0.368206	0.195202	-0.33214	0.245966	0.289237	0.315871	-0.268185	0.353905	0.0585333	0.84245	0.00508375	0.986239	-0.192063	0.510667
GIPC3	blue	-0.901138	1.08604e-05	-0.115037	0.695351	-0.883727	2.76449e-05	0.69529	0.00576808	-0.463594	0.094991	-0.272596	0.345736	-0.292634	0.309962	0.373309	0.188608	-0.336177	0.239922	0.250096	0.388492	-0.112224	0.702487	0.111848	0.703444
LOX	blue	-0.900388	1.13452e-05	-0.167854	0.566244	-0.812702	0.000410863	0.654903	0.0110256	-0.332912	0.244804	-0.302013	0.293978	-0.301552	0.294752	0.508175	0.0635454	-0.456468	0.100866	0.375147	0.186267	-0.131189	0.654845	0.310046	0.280678
ADAP1	blue	-0.900265	1.14262e-05	0.141931	0.628381	-0.887738	2.25965e-05	0.787754	0.000821038	-0.393042	0.164458	-0.396078	0.160932	-0.512073	0.061207	0.301523	0.294801	-0.288495	0.31717	0.304219	0.290291	0.0291691	0.92115	0.223414	0.442615
ENO2	blue	-0.897758	1.31878e-05	0.0129255	0.96502	-0.818815	0.000341473	0.681473	0.00727741	-0.457667	0.0998602	-0.611463	0.0201516	-0.32242	0.260899	0.306811	0.285991	-0.257501	0.374123	0.00935812	0.974671	0.0617602	0.833871	0.0418533	0.887032
B3GNT8	blue	-0.897495	1.33844e-05	-0.262508	0.364571	-0.872972	4.5882e-05	0.621137	0.0177484	-0.531039	0.0507061	-0.302771	0.292707	-0.117586	0.688906	0.375587	0.18571	-0.315117	0.272469	-0.00552198	0.985053	0.0340923	0.90789	-0.0554425	0.850682
RPH3AL	blue	-0.894973	1.53993e-05	0.0110187	0.970178	-0.880051	3.30473e-05	0.736714	0.00265199	-0.642173	0.013277	-0.254001	0.380879	-0.38205	0.177646	0.299902	0.297534	-0.302804	0.292653	0.143942	0.623471	0.0266653	0.927902	-0.125062	0.670115
TMEM121	blue	-0.892356	1.7745e-05	0.104063	0.723317	-0.89703	1.37387e-05	0.847256	0.000130832	-0.431445	0.123475	-0.413865	0.141268	-0.525267	0.0537519	0.216666	0.456867	-0.173256	0.553627	0.379106	0.18129	-0.255438	0.378097	0.366162	0.197885
PLAU	blue	-0.891147	1.89237e-05	-0.191942	0.510937	-0.841608	0.000160597	0.686853	0.00665714	-0.585433	0.0278397	-0.282369	0.328012	-0.24523	0.398091	0.355133	0.21276	-0.306226	0.286958	0.142361	0.62733	-0.140415	0.632091	-0.0658908	0.822915
DDR1	blue	-0.890619	1.94583e-05	-0.120153	0.682433	-0.834352	0.000206653	0.688879	0.00643452	-0.371774	0.190576	-0.283179	0.326567	-0.335838	0.240425	0.439676	0.115692	-0.392214	0.165428	0.377427	0.18339	-0.167295	0.567556	0.350361	0.219408
CD44	blue	-0.890297	1.97908e-05	0.0748042	0.799378	-0.821833	0.00031089	0.730507	0.00300502	-0.706262	0.00475346	-0.340247	0.233918	-0.383902	0.175377	0.262272	0.365019	-0.26822	0.353839	0.0906474	0.757942	-0.0832047	0.77734	-0.2562	0.376628
TRNP1	blue	-0.889845	2.02638e-05	0.0622784	0.832495	-0.91585	4.26775e-06	0.794409	0.000688789	-0.414559	0.140535	-0.606437	0.0214932	-0.375835	0.185396	0.117657	0.688728	-0.0496574	0.866127	0.0482195	0.869973	-0.0723471	0.805852	0.214971	0.460483
TMEM54	blue	-0.887791	2.25362e-05	-0.12079	0.680831	-0.892307	1.77914e-05	0.675617	0.00800259	-0.26801	0.35423	-0.542001	0.0452697	-0.234504	0.419681	0.293648	0.30821	-0.210511	0.470061	0.051072	0.862346	0.0828045	0.778386	0.30449	0.289839
PLA2G16	blue	-0.887719	2.26186e-05	-0.029635	0.919894	-0.851572	0.000111248	0.679639	0.00749882	-0.511833	0.0613493	-0.431853	0.123082	-0.30294	0.292425	0.30212	0.293798	-0.275462	0.340484	-0.00983606	0.973378	0.157037	0.591861	-0.117608	0.688851
LZTFL1	blue	-0.887679	2.26656e-05	-0.18728	0.521446	-0.677889	0.0077149	0.486575	0.0776709	-0.327528	0.252985	-0.384353	0.174828	-0.202704	0.487051	0.687274	0.00661044	-0.655978	0.0108499	0.247406	0.393783	0.0697779	0.812633	0.0757709	0.796835
IL17RC	blue	-0.887188	2.32412e-05	-0.336488	0.23946	-0.843913	0.000147849	0.589215	0.026605	-0.479724	0.0825797	-0.152097	0.60371	-0.114981	0.695494	0.494396	0.0723229	-0.440985	0.114486	0.161355	0.58158	-0.015122	0.95908	0.0249561	0.932513
TINAGL1	blue	-0.884246	2.69449e-05	-0.0123194	0.96666	-0.790149	0.000771284	0.62362	0.0171682	-0.421359	0.133486	-0.488369	0.0764197	-0.322578	0.260653	0.401621	0.154622	-0.38445	0.17471	0.133277	0.64967	0.0438643	0.881638	0.00122579	0.996682
JMY	blue	-0.883385	2.81153e-05	0.0374691	0.898807	-0.902081	1.02748e-05	0.772986	0.00118745	-0.428508	0.126336	-0.470332	0.0896584	-0.391822	0.165889	0.170543	0.559948	-0.128394	0.661795	0.158593	0.588147	-0.135445	0.644313	0.212568	0.465631
SPATA20	blue	-0.882542	2.93015e-05	-0.114035	0.697891	-0.833774	0.000210741	0.694548	0.00584232	-0.578291	0.0302877	-0.102789	0.726585	-0.346639	0.22468	0.436305	0.118838	-0.429924	0.124952	0.311954	0.277573	-0.0714551	0.808205	-0.0358897	0.903054
CADM1	blue	-0.882415	2.94841e-05	-0.0796556	0.786633	-0.850076	0.000117745	0.716244	0.00395712	-0.306504	0.286498	-0.299907	0.297525	-0.391008	0.166848	0.424961	0.12985	-0.374202	0.187468	0.410285	0.14509	-0.0979722	0.73898	0.390635	0.167289
LRP11	blue	-0.881954	3.01534e-05	-0.367509	0.196115	-0.749012	0.00204942	0.489565	0.075594	-0.235995	0.416645	-0.256395	0.376251	-0.112309	0.702271	0.692551	0.00604586	-0.625715	0.0166902	0.281437	0.32968	0.0748637	0.799222	0.274137	0.342907
PLAT	blue	-0.881155	3.13424e-05	-0.256036	0.376944	-0.798823	0.000610937	0.613892	0.0195263	-0.322173	0.261287	-0.262648	0.364306	-0.229074	0.430834	0.544542	0.0440729	-0.477287	0.0843778	0.333335	0.244168	-0.0685263	0.815941	0.306961	0.285743
C1orf21	blue	-0.879693	3.36164e-05	-0.146227	0.61791	-0.810923	0.000433047	0.591676	0.025824	-0.422357	0.132473	-0.331492	0.246946	-0.225193	0.438895	0.458033	0.0995545	-0.425967	0.128847	0.110192	0.707656	0.129504	0.659032	-0.0457594	0.876559
CREB3L4	blue	-0.878127	3.62009e-05	-0.379635	0.180633	-0.739956	0.00248108	0.461149	0.0969796	-0.431531	0.123392	-0.299399	0.298384	-0.0184112	0.950189	0.608478	0.0209404	-0.548361	0.0423183	0.0336157	0.909172	0.0939598	0.749351	-0.102061	0.728455
CD6	blue	-0.877813	3.67382e-05	-0.0178029	0.951832	-0.861036	7.65484e-05	0.673424	0.00828803	-0.622942	0.0173253	-0.373335	0.188574	-0.272009	0.346816	0.263727	0.362268	-0.2482	0.392218	-0.0365588	0.901254	0.0929557	0.751953	-0.220148	0.449485
GSTM4	blue	-0.877696	3.69399e-05	0.12345	0.674152	-0.92178	2.78911e-06	0.799856	0.000593781	-0.316608	0.270083	-0.625558	0.0167257	-0.44487	0.110957	0.128919	0.660488	-0.0738726	0.801831	0.11399	0.698006	0.0241225	0.934763	0.311427	0.278429
ZNF395	blue	-0.877146	3.79019e-05	-0.180167	0.537664	-0.886065	2.46024e-05	0.638028	0.0140812	-0.220703	0.448315	-0.411495	0.14379	-0.210925	0.469167	0.381858	0.177883	-0.305409	0.288311	0.156335	0.593539	0.0831889	0.777381	0.343895	0.228618
MYRF	blue	-0.876719	3.86624e-05	-0.202015	0.488566	-0.848348	0.000125631	0.690458	0.00626506	-0.390076	0.167952	-0.219559	0.450731	-0.298779	0.299434	0.425519	0.129293	-0.368814	0.194409	0.347549	0.223384	-0.148813	0.611638	0.257577	0.373978
YIPF4	blue	-0.876028	3.9919e-05	-0.149586	0.609767	-0.686147	0.00673612	0.515465	0.0592236	-0.295556	0.304929	-0.466483	0.0926789	-0.224893	0.43952	0.586333	0.0275421	-0.543968	0.0443412	0.233061	0.42263	-0.0392911	0.893911	0.164569	0.573973
OLR1	blue	-0.875108	4.16425e-05	-0.229625	0.429694	-0.808325	0.000467185	0.638112	0.0140644	-0.361221	0.204465	-0.263506	0.362684	-0.241088	0.406358	0.473639	0.0871198	-0.410227	0.145153	0.294875	0.306099	-0.103047	0.725923	0.269089	0.352222
ADSS	blue	-0.873641	4.45169e-05	-0.0693148	0.813857	-0.721068	0.0036119	0.567822	0.0341607	-0.440003	0.11539	-0.466113	0.0929729	-0.27055	0.349511	0.504541	0.0657816	-0.481581	0.0812287	0.125081	0.670066	0.0829375	0.778038	-0.105227	0.720334
DLG3	blue	-0.872769	4.63013e-05	-0.280523	0.33132	-0.79992	0.000592718	0.583462	0.0285002	-0.284764	0.323749	-0.246492	0.395591	-0.18467	0.527373	0.550248	0.0414701	-0.47576	0.0855179	0.313178	0.275592	-0.0593773	0.840204	0.33032	0.248723
SLC9A3	blue	-0.872113	4.76822e-05	-0.0685677	0.815831	-0.836419	0.000192567	0.713385	0.00417363	-0.387817	0.170644	-0.25856	0.372092	-0.410839	0.144493	0.419544	0.135343	-0.387282	0.171286	0.362026	0.203383	-0.00859429	0.976738	0.245807	0.396946
DEPTOR	blue	-0.871886	4.81676e-05	0.0895408	0.760818	-0.902405	1.008e-05	0.7733	0.00117849	-0.51477	0.0596264	-0.275821	0.339829	-0.442901	0.112736	0.227029	0.435072	-0.22439	0.440572	0.237738	0.41311	-0.0514056	0.861454	0.0381054	0.897097
NLRP1	blue	-0.871075	4.99346e-05	-0.318386	0.267253	-0.738099	0.0025779	0.529067	0.0517322	-0.378696	0.181802	-0.0724065	0.805695	-0.195977	0.501921	0.692183	0.00608399	-0.660028	0.0102073	0.404503	0.151406	-0.0329987	0.910834	0.15291	0.601753
COL1A1	blue	-0.870846	5.04437e-05	-0.25534	0.378288	-0.789164	0.000791438	0.594848	0.0248425	-0.400112	0.156323	-0.148576	0.612212	-0.208237	0.47498	0.562022	0.0364582	-0.513137	0.0605799	0.351783	0.217413	-0.0985678	0.737445	0.213596	0.463426
C8orf33	blue	-0.870603	5.09867e-05	-0.237322	0.413952	-0.811084	0.000431003	0.572239	0.0324845	-0.544658	0.0440188	-0.246545	0.395485	-0.136531	0.641636	0.438674	0.116621	-0.401007	0.155313	0.0216346	0.94148	0.0932906	0.751085	-0.193262	0.507979
SYNGR1	blue	-0.870431	5.13758e-05	-0.304467	0.289877	-0.802293	0.000554824	0.584227	0.0282425	-0.380289	0.179821	-0.261629	0.36624	-0.158937	0.587328	0.522976	0.0549967	-0.452344	0.104379	0.238386	0.4118	-0.0590025	0.841201	0.173362	0.553382
ACY1	blue	-0.869876	5.26446e-05	-0.258764	0.371702	-0.906462	7.8837e-06	0.64672	0.0124358	-0.33394	0.24326	-0.418077	0.136858	-0.117817	0.688323	0.285027	0.323282	-0.187241	0.521535	0.00476931	0.98709	0.0244159	0.933971	0.206809	0.478083
APOBEC3F	blue	-0.869185	5.42588e-05	-0.373193	0.188756	-0.750974	0.00196428	0.475728	0.0855419	-0.403011	0.153065	-0.2587	0.371823	-0.0427318	0.884675	0.586011	0.0276484	-0.529735	0.0513831	0.0581853	0.843376	0.119059	0.685189	-0.0656816	0.82347
OSBPL6	blue	-0.86903	5.46282e-05	-0.104665	0.721774	-0.819136	0.00033811	0.685544	0.00680413	-0.362548	0.202685	-0.263425	0.362838	-0.366194	0.197842	0.461703	0.0965267	-0.413887	0.141245	0.406389	0.149327	-0.106226	0.717779	0.343355	0.229398
SLC46A3	blue	-0.867809	5.75952e-05	-0.0318374	0.913961	-0.704607	0.00489687	0.614378	0.0194029	-0.576987	0.0307513	-0.258246	0.372694	-0.353036	0.215665	0.49673	0.0707786	-0.498828	0.0694111	0.3516	0.217669	-0.25535	0.378267	-0.0421133	0.886334
NAPRT	blue	-0.867724	5.78063e-05	-0.353792	0.214615	-0.847717	0.000128613	0.586966	0.0273344	-0.498162	0.0698432	-0.221911	0.445771	-0.0685827	0.815792	0.424877	0.129934	-0.349351	0.22083	0.0356311	0.903749	0.0272584	0.926302	-0.0139117	0.962353
NKILA	blue	-0.867642	5.8012e-05	-0.2187	0.452548	-0.741904	0.00238268	0.503154	0.0666499	-0.33099	0.247705	-0.617651	0.0185878	-0.0925418	0.753026	0.445134	0.11072	-0.367187	0.196537	-0.112588	0.701563	0.175655	0.548064	0.0411402	0.888946
GATA6	blue	-0.867042	5.95274e-05	-0.391988	0.165694	-0.777804	0.00105591	0.498586	0.0695674	-0.271016	0.34865	-0.250924	0.386872	-0.0515745	0.861003	0.593272	0.0253264	-0.511431	0.0615882	0.199352	0.494435	0.000529206	0.998567	0.259952	0.369431
L1CAM	blue	-0.865773	6.28372e-05	-0.0874911	0.766153	-0.819291	0.000336495	0.703428	0.00500102	-0.422517	0.13231	-0.218705	0.452538	-0.361855	0.203612	0.422313	0.132517	-0.388683	0.169609	0.377973	0.182706	-0.119497	0.684085	0.221132	0.447411
LGALS3BP	blue	-0.865165	6.4476e-05	-0.0112475	0.969559	-0.857269	8.9109e-05	0.78749	0.000826673	-0.511423	0.0615929	-0.246379	0.395815	-0.434522	0.120526	0.278968	0.334122	-0.245772	0.397016	0.383438	0.175944	-0.285347	0.322716	0.210982	0.469044
EMP3	blue	-0.865072	6.47307e-05	-0.320613	0.263734	-0.817962	0.000350543	0.557396	0.0383708	-0.453776	0.10315	-0.283788	0.325482	-0.0840974	0.775007	0.455891	0.101352	-0.392927	0.164592	0.0153118	0.958567	0.110123	0.707831	-0.0805216	0.784363
LOXL1	blue	-0.861225	7.59585e-05	-0.261706	0.366093	-0.815874	0.000373568	0.59219	0.0256629	-0.301779	0.29437	-0.201047	0.490696	-0.190886	0.513309	0.517975	0.0577857	-0.454616	0.102433	0.338789	0.236059	-0.0916548	0.755327	0.332405	0.245567
PARP9	blue	-0.861193	7.60592e-05	-0.165965	0.570684	-0.81015	0.000442994	0.593856	0.0251463	-0.488184	0.0765484	-0.552285	0.0405687	-0.111788	0.703596	0.249782	0.389109	-0.178946	0.540469	-0.157534	0.590673	-0.0244167	0.933969	-0.13264	0.651247
KCNH7	blue	-0.860777	7.73627e-05	0.217792	0.454475	-0.838133	0.000181483	0.744966	0.00223424	-0.562695	0.0361859	-0.504988	0.0655036	-0.450369	0.10609	0.163699	0.576028	-0.164763	0.573517	0.0407021	0.890122	0.0477998	0.871096	-0.123526	0.673961
AC120049.1	blue	-0.860634	7.78158e-05	-0.335546	0.24086	-0.760063	0.00160568	0.423596	0.131221	-0.192564	0.509544	-0.500562	0.0682945	0.0320883	0.913285	0.567524	0.034276	-0.481053	0.0816112	-0.0793128	0.787532	0.303304	0.291816	0.0963381	0.743199
DGKK	blue	-0.859035	8.30265e-05	-0.259253	0.370767	-0.700899	0.00523029	0.455933	0.101317	-0.215326	0.459725	-0.434973	0.120097	-0.128019	0.662731	0.622853	0.0173459	-0.562724	0.0361742	0.162213	0.579545	0.118962	0.685435	0.20946	0.472331
CDO1	blue	-0.854914	9.77781e-05	-0.110145	0.707775	-0.697772	0.00552501	0.484194	0.0793529	-0.254877	0.379182	-0.464111	0.0945744	-0.202005	0.488588	0.616395	0.0188975	-0.581227	0.0292627	0.137984	0.638059	0.274059	0.34305	0.117102	0.690127
GCNT1	blue	-0.854727	9.84972e-05	-0.145878	0.618758	-0.803782	0.000532062	0.601436	0.0228937	-0.374823	0.186679	-0.192617	0.509424	-0.253537	0.381779	0.503528	0.066415	-0.471533	0.0887308	0.280275	0.331766	0.0634309	0.829436	0.14298	0.625817
SLA	blue	-0.854488	9.94165e-05	-0.0916258	0.755402	-0.80695	0.000486112	0.629008	0.0159592	-0.471332	0.0888856	-0.504133	0.0660363	-0.192134	0.510508	0.26738	0.355407	-0.203282	0.485784	0.011208	0.969666	-0.142866	0.626096	-0.0127239	0.965565
AK4	blue	-0.854338	0.000100002	-0.0598464	0.838957	-0.776017	0.00110327	0.61948	0.0181437	-0.276003	0.339498	-0.368331	0.195039	-0.343475	0.229225	0.491501	0.074271	-0.453973	0.102981	0.30564	0.287929	0.102549	0.727201	0.34189	0.231522
CYBRD1	blue	-0.854204	0.000100524	-0.40376	0.152231	-0.712201	0.0042659	0.431856	0.123078	-0.320946	0.263211	-0.301943	0.294096	0.00270583	0.992675	0.646993	0.0123867	-0.57525	0.0313772	0.081064	0.782942	0.12748	0.664075	0.0383833	0.89635
DEGS1	blue	-0.854127	0.000100823	-0.105288	0.720179	-0.686657	0.006679	0.587365	0.0272039	-0.529355	0.0515814	-0.178214	0.542154	-0.334067	0.24307	0.535451	0.0484641	-0.540327	0.0460711	0.387602	0.170902	-0.245591	0.397374	-0.00787783	0.978677
ACAA2	blue	-0.853955	0.000101502	-0.154192	0.598674	-0.811422	0.000426732	0.579836	0.029745	-0.26928	0.351867	-0.661622	0.00996242	-0.138049	0.637899	0.317428	0.268776	-0.228638	0.431735	-0.130404	0.656797	0.218984	0.451946	0.0740682	0.801316
GPRC5A	blue	-0.853741	0.000102345	-0.35995	0.206179	-0.751749	0.00193142	0.524442	0.0541974	-0.350837	0.218738	-0.205596	0.480725	-0.106689	0.716594	0.582431	0.0288501	-0.518098	0.057716	0.209009	0.473307	0.0222458	0.93983	0.14225	0.627601
HDAC5	blue	-0.8533	0.000104108	0.0161912	0.956189	-0.85329	0.000104149	0.784776	0.000886429	-0.424294	0.130518	-0.380942	0.179012	-0.428687	0.12616	0.209415	0.472428	-0.152638	0.602407	0.343825	0.228719	-0.351653	0.217595	0.364161	0.200533
PTGER3	blue	-0.852604	0.000106937	-0.00590596	0.984013	-0.871875	4.81919e-05	0.746215	0.00217585	-0.492277	0.0737449	-0.169994	0.561232	-0.408655	0.146852	0.310399	0.280102	-0.292384	0.310394	0.320347	0.264153	-0.0694391	0.813528	0.115584	0.693966
PBX1	blue	-0.852474	0.000107472	-0.0792074	0.787808	-0.756945	0.00172227	0.589149	0.0266264	-0.252842	0.383131	-0.58227	0.0289051	-0.2557	0.377592	0.411179	0.144128	-0.347619	0.223284	0.0808288	0.783558	0.145664	0.619277	0.269582	0.351305
C12orf75	blue	-0.851328	0.000112289	-0.312822	0.276167	-0.701102	0.00521154	0.433789	0.121224	-0.294254	0.307165	-0.293854	0.307855	-0.0803865	0.784717	0.69015	0.00629793	-0.645725	0.0126163	0.113424	0.699442	0.302149	0.293749	0.0561644	0.848758
SEMA3F	blue	-0.850579	0.000115526	-0.417952	0.136987	-0.772794	0.00119294	0.47972	0.082583	-0.424925	0.129887	-0.236614	0.415387	0.00714683	0.980655	0.540188	0.0461381	-0.46952	0.0902903	0.0591516	0.840805	0.0158163	0.957203	-0.0333414	0.909911
KRT19	blue	-0.850479	0.000115963	-0.401882	0.154328	-0.773215	0.0011809	0.488509	0.0763228	-0.212994	0.464716	-0.343581	0.229071	-0.0235248	0.936376	0.568175	0.0340245	-0.470169	0.0897853	0.107322	0.714976	0.119988	0.682849	0.255611	0.377764
SCARF2	blue	-0.850035	0.000117929	-0.194839	0.504457	-0.806339	0.000494714	0.6819	0.00722665	-0.433531	0.12147	-0.0537273	0.855256	-0.347305	0.223731	0.479468	0.0827673	-0.445502	0.11039	0.497242	0.0704431	-0.233325	0.422089	0.261684	0.366134
NYNRIN	blue	-0.849532	0.000120182	-0.248421	0.391782	-0.663027	0.00975057	0.491063	0.0745685	-0.300176	0.29707	-0.253613	0.381632	-0.208193	0.475075	0.687028	0.00663768	-0.644177	0.0129012	0.395977	0.161048	-0.0987124	0.737072	0.289072	0.31616
APOBEC3B	blue	-0.849465	0.000120484	-0.0131472	0.96442	-0.782983	0.000927784	0.634177	0.0148609	-0.411807	0.143456	-0.243174	0.402185	-0.372918	0.189108	0.445539	0.110356	-0.454729	0.102337	0.245135	0.398281	0.161075	0.582242	-0.018605	0.949665
ARSK	blue	-0.849269	0.000121378	-0.0284985	0.922958	-0.661083	0.0100447	0.536955	0.0477163	-0.53651	0.0479367	-0.334752	0.242045	-0.295836	0.304451	0.559348	0.037555	-0.574558	0.0316294	0.177321	0.544214	0.0832277	0.777279	-0.233252	0.42224
NBR1	blue	-0.848813	0.000123469	-0.255489	0.377999	-0.619508	0.018137	0.453359	0.103506	-0.440787	0.114668	-0.0804961	0.784429	-0.21961	0.450623	0.774734	0.00113832	-0.779795	0.00100509	0.408611	0.1469	-0.0222844	0.939725	-0.00945177	0.974418
POMGNT1	blue	-0.848286	0.000125919	-0.0344398	0.906954	-0.721758	0.00356452	0.635708	0.0145471	-0.467074	0.0922103	-0.441198	0.114291	-0.327303	0.253331	0.376941	0.184001	-0.336664	0.239197	0.254366	0.380172	-0.273476	0.344118	0.160745	0.583027
ETV1	blue	-0.848182	0.000126411	0.021704	0.941293	-0.69949	0.00536156	0.598311	0.0238031	-0.267361	0.355443	-0.315031	0.272606	-0.436439	0.118712	0.578906	0.0300709	-0.57702	0.0307398	0.469241	0.0905076	0.0176412	0.952269	0.322122	0.261366
AC125232.2	blue	-0.846865	0.000132737	0.10694	0.715954	-0.776348	0.00109438	0.694619	0.00583522	-0.337195	0.238411	-0.512393	0.061018	-0.4515	0.105107	0.331328	0.247193	-0.31176	0.277888	0.263868	0.362002	-0.0115643	0.968702	0.243382	0.40177
ZBTB42	blue	-0.846636	0.000133862	-0.177614	0.543538	-0.76074	0.00158122	0.618008	0.0185005	-0.507892	0.0637177	-0.205694	0.480512	-0.244987	0.398574	0.442417	0.113176	-0.40643	0.149281	0.212663	0.465426	-0.07259	0.805211	-0.0353245	0.904574
FBXO21	blue	-0.846183	0.000136109	-0.413581	0.141568	-0.630248	0.0156901	0.367215	0.1965	-0.328611	0.251327	-0.172706	0.554907	-0.0351359	0.905082	0.802826	0.000546586	-0.766053	0.00139935	0.211938	0.466985	0.154947	0.596861	0.0157262	0.957446
BNIP3L	blue	-0.845276	0.000140707	-0.133065	0.650195	-0.720277	0.00366681	0.51754	0.0580333	-0.160347	0.583972	-0.633641	0.0149721	-0.173118	0.553948	0.457307	0.100161	-0.377032	0.183886	0.0706099	0.810436	0.0876058	0.765854	0.28227	0.32819
JADE1	blue	-0.844614	0.000144138	0.127307	0.664505	-0.649483	0.0119451	0.618344	0.0184186	-0.406333	0.149387	-0.307721	0.284491	-0.532971	0.049715	0.569714	0.0334353	-0.606246	0.0215454	0.468653	0.0909673	0.0174021	0.952916	0.115682	0.693719
TMCO3	blue	-0.844168	0.000146491	0.0531404	0.856822	-0.636522	0.0143823	0.622173	0.0175046	-0.571208	0.0328703	-0.12598	0.66782	-0.503671	0.0663258	0.598812	0.0236557	-0.645884	0.0125874	0.55827	0.0380041	-0.201507	0.489682	0.0104987	0.971585
SERINC3	blue	-0.844152	0.000146574	-0.0602708	0.837828	-0.67491	0.00809377	0.626428	0.0165298	-0.445122	0.11073	-0.236816	0.414979	-0.414541	0.140554	0.520736	0.0562333	-0.509439	0.0627803	0.501906	0.0674386	-0.322646	0.260547	0.198792	0.495674
LGR4	blue	-0.843321	0.000151039	-0.236466	0.415689	-0.701067	0.00521482	0.499337	0.0690822	-0.471586	0.0886899	-0.153051	0.601413	-0.168355	0.565069	0.618269	0.018437	-0.605141	0.0218497	0.194846	0.504441	0.118377	0.686909	-0.147176	0.615605
ARHGEF10L	blue	-0.842936	0.000153148	-0.0895218	0.760868	-0.833065	0.000215842	0.68198	0.00721708	-0.536433	0.0479751	-0.35592	0.211676	-0.248221	0.392176	0.259794	0.369733	-0.209853	0.471481	0.0368936	0.900354	-0.0104126	0.971818	0.00106935	0.997105
ASTN1	blue	-0.841626	0.000160493	-0.0887982	0.76275	-0.723724	0.0034322	0.558707	0.0378216	-0.259229	0.370813	-0.233739	0.421243	-0.338368	0.236678	0.611822	0.0200582	-0.602487	0.022594	0.365342	0.198967	0.202172	0.48822	0.219322	0.451231
CHPF	blue	-0.841169	0.000163121	-0.217047	0.456056	-0.779095	0.00102272	0.643086	0.0131047	-0.41161	0.143668	-0.10173	0.729306	-0.284444	0.324317	0.491874	0.0740176	-0.449049	0.107244	0.458311	0.099323	-0.256469	0.376109	0.279145	0.333802
ADCY3	blue	-0.841168	0.000163126	-0.339308	0.235295	-0.694471	0.00585012	0.498412	0.0696806	-0.330645	0.248228	-0.175955	0.54737	-0.150226	0.608222	0.662292	0.00986096	-0.613607	0.0195989	0.331466	0.246985	-0.0291504	0.921201	0.189099	0.517336
ANKZF1	blue	-0.840503	0.000167013	-0.000498642	0.99865	-0.810085	0.000443831	0.712795	0.00421943	-0.242113	0.404305	-0.379211	0.18116	-0.439899	0.115486	0.372163	0.190076	-0.319573	0.265374	0.401554	0.154697	-0.0645923	0.826356	0.469763	0.0901009
HEIH	blue	-0.840246	0.000168535	-0.0574078	0.845446	-0.951621	1.66719e-07	0.742014	0.0023772	-0.404445	0.151471	-0.499666	0.06887	-0.22878	0.431442	0.0566245	0.847532	0.0243535	0.934139	-0.0696001	0.813103	-0.00681102	0.981564	0.127166	0.664857
KDSR	blue	-0.839763	0.000171429	-0.266324	0.357383	-0.704496	0.00490658	0.505326	0.0652943	-0.318443	0.267163	-0.466854	0.0923846	-0.106155	0.717959	0.473657	0.0871061	-0.39677	0.160135	0.0802759	0.785007	-0.0705716	0.810537	0.156869	0.592261
PDLIM1	blue	-0.839099	0.000175468	-0.136247	0.642336	-0.823221	0.000297588	0.55674	0.0386482	-0.319106	0.266113	-0.549437	0.041833	-0.119631	0.683747	0.307774	0.284404	-0.241272	0.40599	-0.13519	0.644943	0.248575	0.39148	0.0952099	0.746116
TPST1	blue	-0.838084	0.000181789	0.164774	0.573492	-0.622841	0.0173487	0.631977	0.0153211	-0.583115	0.0286175	-0.321435	0.262443	-0.521832	0.055626	0.50552	0.0651739	-0.549059	0.0420032	0.406954	0.148707	-0.130619	0.656262	-0.0546708	0.852739
FBXO8	blue	-0.836637	0.000191126	-0.158737	0.587803	-0.716279	0.00395452	0.505711	0.0650557	-0.3105	0.279938	-0.431999	0.122941	-0.172256	0.555954	0.50978	0.0625749	-0.462524	0.0958579	0.112072	0.702875	0.112793	0.701043	0.0513819	0.861518
TMCO6	blue	-0.834908	0.000202787	-0.174724	0.55022	-0.865056	6.47741e-05	0.604924	0.0219098	-0.428459	0.126384	-0.451398	0.105196	-0.0880179	0.764781	0.224527	0.440287	-0.15107	0.606185	-0.140843	0.631042	0.10233	0.727763	-0.0259337	0.929875
DTX3L	blue	-0.834095	0.000208458	-0.431782	0.12315	-0.634172	0.0148621	0.380349	0.179746	-0.362276	0.203049	-0.202565	0.487358	0.00397072	0.989251	0.716548	0.0039346	-0.660581	0.0101217	0.189193	0.517124	-0.0310348	0.916122	0.0481362	0.870196
PLXDC2	blue	-0.833606	0.000211935	-0.403679	0.152321	-0.672643	0.00839155	0.382897	0.176606	-0.197335	0.498902	-0.220233	0.449306	-0.0290527	0.921464	0.738219	0.00257156	-0.682481	0.00715791	0.211699	0.467499	0.170469	0.560122	0.172449	0.555505
STMN2	blue	-0.833472	0.000212897	-0.194046	0.506228	-0.860818	7.72349e-05	0.673684	0.00825375	-0.307436	0.28496	-0.422123	0.132709	-0.210161	0.470817	0.258849	0.37154	-0.160642	0.583271	0.143118	0.625481	-0.121959	0.677892	0.340127	0.234095
CPA4	blue	-0.833111	0.000215507	-0.0796745	0.786583	-0.835145	0.000201155	0.723967	0.0034161	-0.366978	0.196811	-0.254545	0.379824	-0.364699	0.199819	0.326005	0.255331	-0.269368	0.351704	0.396811	0.160087	-0.240123	0.408297	0.338192	0.236938
GLIPR1	blue	-0.832114	0.000222833	0.00884187	0.976068	-0.766333	0.00139022	0.707639	0.00463675	-0.299322	0.298514	-0.306872	0.285891	-0.455907	0.101339	0.388405	0.16994	-0.352928	0.215816	0.505027	0.0654793	-0.265698	0.358557	0.429898	0.124977
BCKDHA	blue	-0.831678	0.000226104	-0.400628	0.15574	-0.769026	0.00130508	0.524455	0.0541907	-0.415321	0.139733	-0.13643	0.641884	-0.0508384	0.86297	0.517979	0.0577839	-0.444392	0.111387	0.218797	0.452344	-0.16401	0.575294	0.142468	0.627068
GDF6	blue	-0.830985	0.000231377	-0.162476	0.578921	-0.79056	0.000762999	0.667268	0.00913179	-0.430924	0.123979	-0.0982855	0.738173	-0.323693	0.258914	0.444397	0.111382	-0.409651	0.145773	0.416137	0.138877	-0.167649	0.566726	0.216183	0.457896
CCDC28A	blue	-0.830459	0.000235449	-0.100509	0.732444	-0.831447	0.000227849	0.614795	0.0192976	-0.226906	0.435327	-0.714057	0.00412187	-0.156031	0.594265	0.200665	0.491537	-0.0988787	0.736643	-0.10951	0.709392	0.0668701	0.820322	0.203544	0.485211
GBP4	blue	-0.830411	0.000235827	-0.301419	0.294976	-0.597068	0.0241724	0.36278	0.202374	-0.299863	0.297599	-0.315201	0.272333	-0.0690046	0.814677	0.726905	0.00322632	-0.69183	0.00612076	0.154039	0.599039	0.121645	0.678681	0.0467398	0.873933
ANGPTL4	blue	-0.829542	0.000242685	-0.104831	0.721349	-0.830067	0.000238519	0.723147	0.00347061	-0.542501	0.0450323	-0.173913	0.552101	-0.34132	0.232352	0.303753	0.291067	-0.26419	0.361394	0.337264	0.238309	-0.271809	0.347185	0.152311	0.603194
FGFBP3	blue	-0.82942	0.000243659	-0.308805	0.282709	-0.758661	0.00165731	0.525902	0.0534104	-0.329491	0.249984	-0.0842482	0.774612	-0.182929	0.53134	0.587834	0.027051	-0.55733	0.0383987	0.310835	0.279392	0.0674669	0.818743	0.120067	0.682652
SPP1	blue	-0.829402	0.000243802	-0.398723	0.157899	-0.768507	0.00132116	0.533735	0.0493271	-0.274901	0.341509	-0.227787	0.433498	-0.0796151	0.786739	0.525565	0.0535911	-0.42927	0.125589	0.235142	0.41838	-0.0830022	0.777869	0.297328	0.301901
COQ8A	blue	-0.828764	0.000248958	-0.482334	0.0806844	-0.735934	0.00269448	0.430178	0.124704	-0.168505	0.564716	-0.265536	0.358861	0.0221065	0.940206	0.625427	0.0167552	-0.526551	0.0530627	0.155354	0.595888	0.0849247	0.772846	0.290451	0.313752
BDNF	blue	-0.828152	0.000253992	-0.0761199	0.795917	-0.726891	0.00322717	0.654673	0.0110635	-0.353651	0.214811	-0.18185	0.533807	-0.414988	0.140083	0.511259	0.0616903	-0.482126	0.0808344	0.545329	0.0437071	-0.220385	0.448986	0.410148	0.145237
IL1RL1	blue	-0.827232	0.000261709	-0.395971	0.161055	-0.693367	0.005962	0.435972	0.119152	-0.161917	0.580246	-0.351084	0.218392	-0.033384	0.909796	0.637164	0.0142534	-0.543866	0.044389	0.18102	0.535707	0.0713102	0.808587	0.31529	0.272191
UBA7	blue	-0.827013	0.000263565	-0.322195	0.261252	-0.763714	0.00147723	0.507649	0.0638654	-0.252514	0.383768	-0.166037	0.570515	-0.11286	0.700872	0.563802	0.0357413	-0.502997	0.0667489	0.306633	0.286285	-0.0526149	0.858225	0.289984	0.314566
ELFN1	blue	-0.826297	0.000269741	-0.383421	0.175965	-0.749767	0.00201633	0.473137	0.0875016	-0.11732	0.689578	-0.248038	0.392538	-0.083296	0.777101	0.623673	0.017156	-0.538529	0.046943	0.285926	0.321692	0.0702767	0.811315	0.397715	0.159051
RFX5	blue	-0.826199	0.000270591	0.0909025	0.75728	-0.702188	0.00511245	0.653881	0.0111947	-0.463514	0.095056	-0.128088	0.662559	-0.542329	0.0451142	0.516263	0.0587638	-0.564005	0.0356604	0.500954	0.0680441	0.014345	0.961181	0.0503992	0.864144
PDE9A	blue	-0.825953	0.000272745	0.168409	0.564943	-0.869824	5.27646e-05	0.82709	0.000262908	-0.390295	0.167691	-0.396955	0.159921	-0.544695	0.0440019	0.135281	0.644717	-0.0976124	0.739909	0.385255	0.173732	-0.269795	0.35091	0.397851	0.158895
MEIS2	blue	-0.825121	0.000280128	-0.13333	0.649539	-0.756686	0.00173226	0.573497	0.0320186	-0.172875	0.554513	-0.257115	0.374865	-0.310225	0.280386	0.520258	0.0565003	-0.488099	0.0766076	0.377404	0.18342	0.0641983	0.827401	0.345829	0.225839
FBLN5	blue	-0.824573	0.000285075	-0.0267993	0.92754	-0.786499	0.00084811	0.753081	0.00187599	-0.507971	0.0636692	-0.0528279	0.857656	-0.486522	0.0777077	0.38731	0.171252	-0.37787	0.182835	0.585208	0.0279146	-0.347298	0.223742	0.277122	0.337463
GRIA1	blue	-0.824281	0.000287742	-0.0187285	0.949331	-0.822142	0.000307883	0.755054	0.00179622	-0.376864	0.184098	-0.233798	0.421123	-0.465623	0.0933628	0.287868	0.31827	-0.254851	0.379233	0.473829	0.0869755	-0.306364	0.28673	0.389496	0.16864
SLFN13	blue	-0.823793	0.000292239	0.126978	0.665327	-0.664396	0.00954734	0.592599	0.0255352	-0.32287	0.260196	-0.474786	0.086251	-0.4514	0.105194	0.484691	0.0789998	-0.492536	0.0735704	0.242189	0.404153	0.213125	0.464435	0.0436627	0.882179
GATM	blue	-0.822381	0.000305575	-0.0181611	0.950864	-0.594956	0.0248095	0.482642	0.0804628	-0.605315	0.0218018	-0.402224	0.153945	-0.247519	0.393561	0.526754	0.0529546	-0.540558	0.0459597	0.0317872	0.914096	0.105827	0.718798	-0.348195	0.222467
CDH8	blue	-0.821738	0.000311812	-0.272534	0.34585	-0.781925	0.000952895	0.567904	0.034129	-0.410071	0.14532	-0.458761	0.0989493	-0.0659979	0.822632	0.300243	0.296956	-0.200379	0.492168	-0.0207354	0.943909	-0.140616	0.631598	0.127255	0.664636
NRK	blue	-0.821205	0.000317064	0.0103105	0.972094	-0.771296	0.00123657	0.676893	0.00783992	-0.432622	0.122341	-0.364805	0.199678	-0.377441	0.183373	0.302572	0.293041	-0.268937	0.352503	0.326479	0.254599	-0.283814	0.325436	0.220373	0.449011
GLT8D2	blue	-0.820946	0.000319633	0.163824	0.575732	-0.781231	0.000969659	0.712193	0.00426654	-0.397008	0.159861	-0.402471	0.153669	-0.482914	0.0802676	0.304585	0.289681	-0.292662	0.309912	0.310514	0.279914	-0.0409775	0.889382	0.133822	0.648322
AATK	blue	-0.819996	0.000329228	0.0932873	0.751093	-0.87015	5.20139e-05	0.805769	0.000502847	-0.466248	0.0928655	-0.18233	0.53271	-0.514636	0.0597042	0.199052	0.495098	-0.194417	0.505397	0.383983	0.175279	-0.149028	0.611117	0.174191	0.551457
SLC45A3	blue	-0.819647	0.000332811	-0.205528	0.480872	-0.81129	0.000428396	0.624205	0.0170338	-0.269244	0.351933	-0.36602	0.198072	-0.210392	0.470318	0.34778	0.223056	-0.257939	0.373282	0.25284	0.383134	-0.182974	0.531237	0.415431	0.139617
WISP1	blue	-0.819535	0.000333965	-0.397646	0.15913	-0.711875	0.0042916	0.487773	0.0768338	-0.26569	0.358572	-0.19542	0.503161	-0.0753565	0.797925	0.591571	0.0258567	-0.509922	0.0624894	0.30778	0.284394	-0.157059	0.591808	0.3123	0.277012
TRIP6	blue	-0.819499	0.000334334	-0.0575645	0.845028	-0.774613	0.00114166	0.654713	0.011057	-0.426392	0.128425	-0.376614	0.184413	-0.342553	0.230559	0.34761	0.223298	-0.311785	0.277847	0.147096	0.615798	0.102225	0.728034	0.077364	0.792647
DOCK5	blue	-0.819441	0.00033494	0.0832136	0.777316	-0.639261	0.0138381	0.587695	0.0270964	-0.576128	0.0310597	-0.308068	0.28392	-0.414124	0.140994	0.443335	0.112342	-0.480545	0.0819804	0.229846	0.429238	-0.0423838	0.885608	-0.23246	0.423862
AL691432.2	blue	-0.818681	0.000342879	-0.399393	0.157137	-0.753186	0.00187167	0.419932	0.134946	-0.163365	0.576819	-0.432474	0.122484	0.0425668	0.885118	0.521258	0.0559433	-0.420189	0.134682	-0.0770105	0.793576	0.294898	0.306058	0.206274	0.479247
AMPH	blue	-0.817993	0.000350205	-0.00410266	0.988894	-0.630408	0.0156557	0.537247	0.0475723	-0.488412	0.07639	-0.506475	0.0645845	-0.277699	0.336417	0.429173	0.125684	-0.406967	0.148692	0.103775	0.724056	-0.065232	0.824661	0.00796694	0.978436
PID1	blue	-0.817898	0.000351232	-0.116933	0.690554	-0.828211	0.000253502	0.686519	0.00669436	-0.220011	0.449775	-0.377897	0.182802	-0.304317	0.290128	0.301803	0.29433	-0.216432	0.457367	0.327615	0.252852	-0.201071	0.490643	0.502185	0.0672615
TESK2	blue	-0.816675	0.000364592	-0.288299	0.317514	-0.749659	0.00202105	0.511285	0.0616749	-0.206904	0.477874	-0.285006	0.32332	-0.131112	0.655037	0.538373	0.0470195	-0.459043	0.0987154	0.247986	0.39264	0.0286815	0.922465	0.387086	0.171522
PSRC1	blue	-0.816441	0.000367189	-0.0692843	0.813937	-0.742126	0.00237164	0.561163	0.0368082	-0.433227	0.121761	-0.219001	0.451911	-0.280405	0.331532	0.477231	0.0844189	-0.486348	0.0778299	0.140974	0.630723	0.277713	0.33639	-0.134412	0.646865
FBXO32	blue	-0.816121	0.000370778	0.0355871	0.903868	-0.7919	0.000736476	0.751815	0.00192864	-0.440833	0.114626	-0.420437	0.134427	-0.425164	0.129648	0.196577	0.500586	-0.139435	0.634493	0.320815	0.263416	-0.36958	0.193413	0.325896	0.255498
BOC	blue	-0.815569	0.000377031	-0.507881	0.0637239	-0.767125	0.00136475	0.423592	0.131224	-0.305677	0.287867	-0.177355	0.544134	0.0830525	0.777738	0.572174	0.0325089	-0.486152	0.0779679	0.034459	0.906903	0.155491	0.595559	0.071488	0.808118
LRRC75B	blue	-0.815529	0.000377486	-0.23404	0.420628	-0.747858	0.00210088	0.569391	0.0335583	-0.587484	0.0271649	-0.116749	0.691021	-0.14556	0.619531	0.431959	0.122979	-0.398433	0.15823	0.115984	0.692955	-0.0377443	0.898067	-0.156329	0.593553
AC009948.1	blue	-0.815491	0.000377915	-0.0922113	0.753883	-0.749289	0.00203721	0.479917	0.0824386	-0.199033	0.49514	-0.738499	0.00255679	-0.0874412	0.766283	0.348416	0.222154	-0.270202	0.350156	-0.233087	0.422577	0.376421	0.184657	0.0444174	0.880155
CNN1	blue	-0.815402	0.000378935	-0.245433	0.397689	-0.774231	0.00115226	0.619404	0.018162	-0.268456	0.3534	-0.159869	0.585109	-0.271895	0.347026	0.489881	0.0753769	-0.42431	0.130502	0.46528	0.0936367	-0.203054	0.486284	0.431202	0.12371
HLA-DPB1	blue	-0.815087	0.000382556	-0.296671	0.303022	-0.862777	7.12525e-05	0.624917	0.0168711	-0.340798	0.233114	-0.262627	0.364346	-0.126417	0.666727	0.305262	0.288555	-0.209057	0.473204	0.155209	0.596234	-0.141826	0.628636	0.271471	0.347808
ACADS	blue	-0.815079	0.000382646	-0.036183	0.902265	-0.676603	0.00787671	0.526609	0.0530322	-0.551892	0.0407415	-0.267963	0.354319	-0.250443	0.387813	0.494164	0.0724773	-0.509654	0.0626506	0.0736865	0.802322	0.221977	0.445632	-0.226719	0.435716
NEK7	blue	-0.813413	0.000402243	-0.286629	0.320451	-0.582683	0.0287643	0.379044	0.181368	-0.401753	0.154474	-0.140969	0.630734	-0.126173	0.667337	0.785783	0.00086386	-0.77856	0.00103637	0.271631	0.347514	0.125475	0.669082	-0.0916485	0.755343
STAT6	blue	-0.812377	0.000414843	-0.373996	0.187731	-0.751641	0.001936	0.458432	0.0992226	-0.484417	0.0791944	-0.308814	0.282695	0.0502383	0.864574	0.419933	0.134944	-0.353653	0.214808	-0.169217	0.563049	0.156462	0.593236	-0.261072	0.367297
HEY2	blue	-0.812326	0.000415471	-0.105474	0.719703	-0.769902	0.00127828	0.565618	0.0350211	-0.0413493	0.888384	-0.566979	0.0344878	-0.238198	0.412179	0.39726	0.159572	-0.308906	0.282544	0.193162	0.508204	0.0810729	0.782918	0.543127	0.0447367
TMEM243	blue	-0.812227	0.000416685	0.0611065	0.835608	-0.832455	0.000220302	0.662831	0.00977986	-0.192818	0.508974	-0.537692	0.0473533	-0.346456	0.224942	0.246374	0.395824	-0.192714	0.509207	0.142238	0.627631	0.120053	0.682687	0.311521	0.278276
CPAMD8	blue	-0.812179	0.000417279	-0.0418711	0.886984	-0.880792	3.18939e-05	0.747266	0.00212763	-0.294152	0.307342	-0.440356	0.115064	-0.327047	0.253725	0.13532	0.644621	-0.0504034	0.864132	0.198008	0.49741	-0.205067	0.48188	0.374665	0.18688
C1QTNF5	blue	-0.81103	0.000431685	0.20111	0.490556	-0.74406	0.00227739	0.754153	0.00183229	-0.414026	0.141097	-0.408493	0.147029	-0.556198	0.0388783	0.246709	0.395161	-0.235383	0.417891	0.459521	0.0983191	-0.371867	0.190457	0.35987	0.206287
TTC31	blue	-0.809517	0.00045127	0.140873	0.630969	-0.695702	0.00572713	0.705369	0.00483044	-0.730076	0.0030309	-0.114636	0.696369	-0.521324	0.055907	0.377859	0.182848	-0.42643	0.128388	0.366814	0.197027	-0.131788	0.65336	-0.20402	0.484168
CITED2	blue	-0.809498	0.00045151	-0.278465	0.335031	-0.810545	0.000437886	0.586504	0.0274859	-0.246235	0.3961	-0.172511	0.55536	-0.170506	0.560035	0.443939	0.111795	-0.369527	0.193482	0.30733	0.285134	-0.0606573	0.836801	0.369729	0.193218
PAFAH2	blue	-0.809323	0.000453831	0.0901306	0.759285	-0.758435	0.00166577	0.634611	0.0147715	-0.284485	0.324245	-0.564882	0.0353115	-0.381323	0.178541	0.251196	0.386339	-0.220825	0.448057	0.139393	0.634597	-0.00775009	0.979022	0.242386	0.403758
TMEM79	blue	-0.808641	0.00046292	0.084783	0.773216	-0.789433	0.000785908	0.670474	0.00868453	-0.363368	0.201589	-0.478144	0.0837425	-0.335219	0.241347	0.223198	0.443069	-0.178558	0.541363	0.134001	0.647881	-0.0761185	0.795921	0.217375	0.455359
PPP1R3B	blue	-0.808386	0.000466357	0.0990898	0.736099	-0.579783	0.0297637	0.535834	0.0482731	-0.38576	0.17312	-0.464899	0.0939419	-0.406131	0.14961	0.523363	0.0547847	-0.532592	0.0499083	0.307025	0.285638	-0.0464815	0.874625	0.108701	0.711456
TAGLN	blue	-0.808282	0.000467771	0.152387	0.603012	-0.744851	0.00223968	0.756507	0.00173919	-0.385515	0.173417	-0.303399	0.291657	-0.580565	0.0294917	0.315213	0.272315	-0.303743	0.291083	0.562089	0.036431	-0.340679	0.233288	0.44654	0.109463
PDLIM2	blue	-0.806936	0.000486299	0.129476	0.659103	-0.92241	2.66081e-06	0.866632	6.05806e-05	-0.409691	0.14573	-0.272605	0.345718	-0.544292	0.0441899	0.085746	0.770702	-0.0509397	0.862699	0.372949	0.189067	-0.182033	0.533387	0.335466	0.240979
PDGFRB	blue	-0.80645	0.000493143	-0.336196	0.239893	-0.755517	0.00177788	0.546228	0.0432921	-0.237496	0.413599	-0.142782	0.626302	-0.149093	0.610959	0.53656	0.0479119	-0.45864	0.0990499	0.384155	0.175069	-0.147378	0.615116	0.399152	0.157412
TMTC1	blue	-0.806374	0.000494219	0.0278137	0.924804	-0.769348	0.00129519	0.736013	0.00269014	-0.415589	0.139451	-0.0566612	0.847434	-0.518758	0.0573426	0.396116	0.160887	-0.397108	0.159746	0.60578	0.0216735	-0.252457	0.38388	0.317775	0.268224
GSTT2B	blue	-0.806236	0.00049617	-0.225855	0.437516	-0.823954	0.000290745	0.553527	0.0400265	-0.500482	0.0683457	-0.456586	0.100767	-0.0245953	0.933487	0.190771	0.513568	-0.118053	0.687727	-0.255092	0.378766	0.078507	0.789646	-0.204951	0.482132
RMI2	blue	-0.806165	0.000497188	0.026751	0.92767	-0.730862	0.00298391	0.537661	0.0473684	-0.234459	0.419772	-0.528152	0.0522135	-0.291311	0.312256	0.392433	0.165171	-0.378313	0.182281	0.00799602	0.978357	0.397722	0.159042	0.0349114	0.905685
FRAT1	blue	-0.80585	0.000501682	-0.30394	0.290755	-0.782908	0.000929535	0.567631	0.0342346	-0.509768	0.0625821	-0.157254	0.591341	-0.0819714	0.780566	0.346778	0.224482	-0.284546	0.324136	0.121577	0.678852	-0.236539	0.415539	-0.0239643	0.93519
TENT5B	blue	-0.804851	0.000516173	-0.424319	0.130494	-0.72759	0.00318325	0.36424	0.200427	-0.255616	0.377754	-0.501121	0.0679376	0.1636	0.576262	0.48559	0.0783636	-0.378586	0.181939	-0.267973	0.354299	0.322082	0.261428	-0.0073641	0.980067
LINC02188	blue	-0.804851	0.000516179	0.146989	0.616059	-0.57255	0.0323688	0.544021	0.0443167	-0.473841	0.0869659	-0.310185	0.280452	-0.484679	0.0790085	0.570557	0.0331155	-0.62638	0.0165406	0.37838	0.182197	0.0366271	0.901071	-0.0682898	0.816566
ERLIN1	blue	-0.803231	0.000540391	-0.114499	0.696713	-0.541937	0.0453001	0.390804	0.167089	-0.40521	0.150624	-0.252595	0.383612	-0.236515	0.415589	0.743223	0.00231783	-0.768171	0.00133165	0.246116	0.396335	0.205569	0.480783	-0.140255	0.632483
EXT1	blue	-0.803093	0.000542494	0.187426	0.521117	-0.630231	0.0156939	0.698169	0.00548694	-0.518214	0.0576502	-0.178278	0.542007	-0.633258	0.0150519	0.461269	0.0968811	-0.506021	0.0648642	0.638616	0.0139649	-0.313555	0.274982	0.192433	0.509836
COL1A2	blue	-0.802151	0.000557034	-0.462287	0.0960502	-0.710375	0.00441143	0.427389	0.127438	-0.298221	0.300381	-0.098366	0.737965	-0.00052373	0.998582	0.654877	0.0110299	-0.58685	0.0273723	0.202412	0.487692	0.104102	0.723218	0.116816	0.690851
STEAP3	blue	-0.802042	0.000558739	-0.378979	0.181449	-0.683718	0.0070133	0.48378	0.0796479	-0.409501	0.145935	-0.0933933	0.750818	-0.112477	0.701845	0.617927	0.0185203	-0.570344	0.0331959	0.251095	0.386538	0.017905	0.951557	0.0188373	0.949037
KRT7	blue	-0.800804	0.000578366	-0.344053	0.228391	-0.736593	0.00265857	0.505385	0.0652576	-0.137067	0.640315	-0.245222	0.398106	-0.122504	0.676524	0.547539	0.0426914	-0.459673	0.0981934	0.338258	0.236841	-0.0927219	0.752559	0.473153	0.0874899
MAGEF1	blue	-0.800705	0.000579963	0.101029	0.731108	-0.909962	6.3204e-06	0.835975	0.000195524	-0.489262	0.0758026	-0.22967	0.429603	-0.490469	0.0749744	0.0789072	0.788596	-0.0480294	0.870481	0.27795	0.335962	-0.149164	0.61079	0.208577	0.474242
GPR85	blue	-0.800111	0.00058959	-0.22332	0.442813	-0.781502	0.000963075	0.553696	0.0399531	-0.370432	0.192307	-0.298782	0.299428	-0.121024	0.680243	0.32588	0.255523	-0.264993	0.359882	0.0766133	0.79462	-0.0676951	0.818139	0.0815779	0.781596
KRT18	blue	-0.798372	0.000618542	-0.416804	0.138181	-0.79057	0.000762802	0.534787	0.0487968	-0.233359	0.42202	-0.17509	0.549372	-0.0647438	0.825955	0.473702	0.0870714	-0.374928	0.186545	0.237936	0.412709	-0.071539	0.807984	0.344768	0.227362
NECTIN3	blue	-0.798293	0.000619887	-0.264032	0.361691	-0.625304	0.0167832	0.346635	0.224687	-0.124144	0.672412	-0.517441	0.0580896	-0.0426682	0.884845	0.628232	0.016129	-0.571056	0.0329275	-0.0281056	0.924017	0.374066	0.187642	0.0834224	0.77677
EHBP1L1	blue	-0.798223	0.000621084	-0.27218	0.3465	-0.879963	3.31876e-05	0.662752	0.00979175	-0.363187	0.20183	-0.208295	0.474855	-0.165868	0.570913	0.252488	0.38382	-0.160821	0.582846	0.155839	0.594726	-0.0990102	0.736304	0.250033	0.388616
PFKP	blue	-0.798207	0.000621359	0.0667103	0.820745	-0.723497	0.00344729	0.699502	0.00536037	-0.358355	0.208344	-0.221527	0.446578	-0.549553	0.0417809	0.418197	0.136733	-0.424739	0.130073	0.510013	0.0624352	-0.0684356	0.816181	0.242707	0.403116
VEGFC	blue	-0.797844	0.00062756	0.123404	0.674266	-0.662109	0.00988853	0.589275	0.0265859	-0.302868	0.292545	-0.321229	0.262766	-0.451437	0.105162	0.47312	0.087515	-0.487092	0.0773087	0.453754	0.103168	-0.107981	0.713293	0.2634	0.362884
RMND5A	blue	-0.79701	0.000642008	-0.188287	0.519169	-0.587735	0.0270832	0.410572	0.14478	-0.156705	0.592653	-0.338006	0.237213	-0.185754	0.524908	0.692636	0.00603711	-0.657163	0.0106588	0.348372	0.222216	0.0175255	0.952582	0.313579	0.274943
CCDC8	blue	-0.796025	0.00065942	-0.535433	0.0484728	-0.685857	0.00676876	0.372309	0.189889	-0.1524	0.60298	-0.187066	0.52193	0.0685733	0.815817	0.682563	0.00714823	-0.585851	0.0277014	0.191383	0.512192	0.0700657	0.811873	0.29301	0.309312
CORO2A	blue	-0.795859	0.000662385	-0.422778	0.132046	-0.725804	0.0032964	0.432934	0.122042	-0.153747	0.599742	-0.2351	0.418466	0.00522684	0.985851	0.606586	0.0214524	-0.51525	0.0593478	0.178804	0.540797	0.115256	0.694798	0.282608	0.327586
COLGALT2	blue	-0.795464	0.0006695	-0.384358	0.174822	-0.654958	0.0110166	0.425569	0.129243	-0.282457	0.327856	-0.0426985	0.884764	-0.102117	0.72831	0.728389	0.00313363	-0.680668	0.00737397	0.402678	0.153437	-0.0326869	0.911673	0.247861	0.392887
ADGRG6	blue	-0.795224	0.000673842	0.111579	0.704126	-0.627022	0.0163969	0.609774	0.0205952	-0.272701	0.345542	-0.292306	0.31053	-0.531963	0.0502306	0.538679	0.04687	-0.55028	0.041456	0.599452	0.0234682	-0.164382	0.574415	0.370762	0.191881
SLC7A5	blue	-0.795208	0.000674142	-0.238905	0.410751	-0.635426	0.0146045	0.507072	0.064218	-0.290142	0.314289	-0.0846029	0.773686	-0.262484	0.364618	0.672312	0.00843579	-0.6443	0.0128782	0.532151	0.0501339	-0.162774	0.578217	0.32716	0.25355
MFGE8	blue	-0.794298	0.000690853	-0.521024	0.0560736	-0.749616	0.00202293	0.424844	0.129967	-0.230167	0.428577	-0.268035	0.354184	0.101309	0.730387	0.530746	0.0508573	-0.411184	0.144124	0.0318806	0.913844	0.0692837	0.813939	0.231934	0.424941
CNTNAP3B	blue	0.794075	0.000694988	0.0819716	0.780566	0.835333	0.000199865	-0.589462	0.0265259	0.330075	0.249094	0.717885	0.00383689	0.0775288	0.792215	-0.0727948	0.804672	-0.0249956	0.932407	0.309313	0.281877	-0.109969	0.708224	-0.0426384	0.884926
TMCO4	blue	-0.793294	0.000709661	-0.257562	0.374006	-0.733744	0.00281658	0.574016	0.0318277	-0.340698	0.233259	0.00752092	0.979643	-0.256408	0.376227	0.528322	0.0521235	-0.493259	0.0730832	0.475767	0.085513	-0.184112	0.528641	0.303585	0.291348
PAN2	blue	-0.793283	0.000709871	-0.433404	0.121592	-0.711366	0.00433198	0.389832	0.168241	-0.210861	0.469305	-0.231588	0.425653	0.0367365	0.900777	0.627409	0.0163109	-0.549475	0.0418159	0.070473	0.810797	0.260927	0.367573	0.119018	0.685293
FAM216A	blue	-0.792482	0.000725177	-0.0203235	0.945022	-0.795515	0.000668583	0.604225	0.0221044	-0.176254	0.546678	-0.675999	0.00795356	-0.220742	0.448232	0.231032	0.426795	-0.140028	0.633039	-0.0444501	0.880067	0.159256	0.586568	0.227254	0.434604
MAPKAPK3	blue	-0.791973	0.000735052	0.113315	0.699716	-0.770276	0.00126699	0.748333	0.00207955	-0.529913	0.0512901	-0.26095	0.367529	-0.497468	0.0702952	0.195661	0.502625	-0.198551	0.496206	0.411823	0.143439	-0.417446	0.137512	0.126116	0.667478
CHPT1	blue	-0.791524	0.000743837	-0.223945	0.441502	-0.553281	0.0401334	0.383263	0.176158	-0.440907	0.114558	-0.123678	0.67358	-0.151789	0.604451	0.762613	0.00151509	-0.77155	0.00122908	0.299635	0.297985	0.0718361	0.8072	-0.0979119	0.739136
ARHGEF39	blue	-0.791366	0.00074695	-0.0881741	0.764374	-0.65089	0.0117009	0.508254	0.0634972	-0.359386	0.206942	-0.258519	0.372171	-0.315368	0.272067	0.547879	0.0425367	-0.553925	0.039854	0.219757	0.450313	0.210502	0.47008	-0.0857273	0.770751
VASN	blue	-0.790959	0.000755029	-0.191388	0.51218	-0.749112	0.00204501	0.632407	0.0152303	-0.426513	0.128305	-0.0414321	0.888162	-0.29233	0.310487	0.450678	0.105821	-0.415563	0.139479	0.452471	0.104269	-0.232593	0.423589	0.256163	0.376699
SCARA3	blue	-0.790743	0.000759336	-0.50558	0.0651366	-0.633961	0.0149056	0.325527	0.256069	-0.134492	0.646667	-0.194623	0.504937	0.0534351	0.856036	0.767384	0.0013565	-0.690817	0.00622708	0.177728	0.543276	0.221688	0.44624	0.205819	0.480238
WNK4	blue	-0.790615	0.000761887	-0.452892	0.103907	-0.65559	0.0109131	0.374721	0.186809	-0.250152	0.388382	-0.163007	0.577666	0.0204229	0.944753	0.706039	0.00477262	-0.637135	0.014259	0.199737	0.493584	0.111371	0.704655	0.188864	0.517866
MTUS1	blue	-0.79046	0.000765004	0.0298446	0.919329	-0.688102	0.00651922	0.618826	0.0183017	-0.305196	0.288666	-0.273785	0.343552	-0.439566	0.115794	0.441438	0.114071	-0.429295	0.125565	0.507408	0.0640128	-0.239427	0.409699	0.325779	0.255679
PLD1	blue	-0.790321	0.00076781	0.206683	0.478357	-0.549622	0.0417499	0.579374	0.0299068	-0.591827	0.0257764	-0.31281	0.276185	-0.525383	0.0536889	0.484272	0.0792973	-0.546503	0.0431656	0.372682	0.18941	-0.1248	0.67077	-0.158546	0.588259
PRKCD	blue	-0.790307	0.000768087	-0.0240695	0.934906	-0.765512	0.00141706	0.674651	0.00812736	-0.571312	0.0328312	-0.115333	0.694603	-0.355625	0.212081	0.313902	0.274423	-0.315867	0.271267	0.275193	0.340976	-0.112523	0.701729	-0.122335	0.676948
UNC5C	blue	-0.789742	0.000779564	-0.536271	0.0480555	-0.690935	0.00621455	0.38058	0.17946	-0.275606	0.340221	-0.0971465	0.741111	0.0761842	0.795748	0.643124	0.0130976	-0.563145	0.0360049	0.183784	0.529389	-0.0201019	0.94562	0.151596	0.604917
RACGAP1	blue	-0.789675	0.00078094	-0.029396	0.920539	-0.567493	0.0342881	0.473295	0.0873814	-0.445848	0.11008	-0.148079	0.613415	-0.364252	0.200412	0.679375	0.00753105	-0.726237	0.00326871	0.363883	0.200903	0.154258	0.598514	-0.106694	0.716583
CTBP1-DT	blue	-0.788319	0.000809063	-0.00218877	0.994075	-0.667356	0.00911918	0.604895	0.0219181	-0.423746	0.131069	-0.00857004	0.976803	-0.463058	0.0954244	0.583807	0.0283837	-0.612634	0.0198483	0.595158	0.024748	-0.0897426	0.760294	0.156168	0.593939
TYRP1	blue	-0.78821	0.000811363	-0.314811	0.272961	-0.721651	0.00357181	0.549227	0.0419274	-0.24019	0.408162	-0.147378	0.615114	-0.184147	0.528563	0.520375	0.0564351	-0.447276	0.108809	0.400672	0.15569	-0.175	0.549579	0.397244	0.15959
CALCOCO1	blue	-0.785682	0.000866113	-0.253916	0.381045	-0.618601	0.0183561	0.449885	0.106513	-0.193663	0.507083	-0.269176	0.352061	-0.160001	0.584795	0.640267	0.0136422	-0.579259	0.0299471	0.395929	0.161104	-0.149639	0.60964	0.386207	0.17258
SNAPC5	blue	-0.785118	0.000878723	-0.405292	0.150534	-0.728529	0.00312502	0.373234	0.188703	-0.185644	0.525158	-0.497798	0.07008	0.131563	0.653917	0.474486	0.0864776	-0.360896	0.204902	-0.224491	0.440362	0.351235	0.21818	0.105809	0.718845
GATA3	blue	-0.78413	0.000901162	-0.0302775	0.918163	-0.763673	0.00147864	0.611383	0.0201723	-0.499692	0.0688528	-0.120497	0.681569	-0.313248	0.275477	0.35694	0.210276	-0.361051	0.204694	0.258184	0.372812	-0.023134	0.937431	0.00721386	0.980474
MRC2	blue	-0.783756	0.000909763	-0.463741	0.0948727	-0.683228	0.00707034	0.398558	0.158088	-0.0854236	0.771544	-0.227764	0.433547	0.00534864	0.985522	0.666274	0.009274	-0.567775	0.0341789	0.258412	0.372376	0.0637163	0.828679	0.397328	0.159494
GPAT3	blue	-0.783353	0.000919115	-0.474449	0.0865057	-0.688132	0.00651589	0.375923	0.185285	-0.140648	0.63152	-0.202567	0.487353	0.0508196	0.86302	0.651818	0.011542	-0.561883	0.0365146	0.189933	0.515453	0.0779801	0.791029	0.254704	0.379517
FGD5-AS1	blue	-0.783288	0.000920634	0.15107	0.606184	-0.616849	0.0187852	0.592535	0.0255552	-0.412541	0.142673	-0.294276	0.307128	-0.516818	0.0584454	0.493112	0.073182	-0.525739	0.0534979	0.432873	0.1221	-0.0329098	0.911073	0.0683864	0.816311
MGLL	blue	-0.782777	0.000932619	0.0990234	0.73627	-0.754522	0.00181745	0.683226	0.0070706	-0.563425	0.0358925	-0.256886	0.375305	-0.417553	0.137401	0.275048	0.341239	-0.288649	0.3169	0.147567	0.614657	0.132417	0.651801	-0.149821	0.609199
FZD2	blue	-0.781331	0.000967213	-0.428328	0.126513	-0.664803	0.00948751	0.424841	0.129971	-0.195732	0.502466	-0.21177	0.467348	-0.0186391	0.949573	0.608224	0.0210087	-0.517458	0.0580798	0.286558	0.320576	-0.144528	0.622043	0.35895	0.207535
BICC1	blue	-0.781113	0.000972528	0.0198841	0.946209	-0.748473	0.0020733	0.614999	0.0192463	-0.106528	0.717007	-0.466485	0.0926773	-0.409251	0.146206	0.366683	0.197199	-0.326678	0.254292	0.297411	0.30176	0.137037	0.640389	0.465325	0.0936005
ZER1	blue	-0.781077	0.000973392	-0.338215	0.236904	-0.653151	0.0113167	0.501556	0.0676608	-0.377793	0.182931	0.00187392	0.994927	-0.179054	0.54022	0.609133	0.0207655	-0.56399	0.0356665	0.481277	0.0814484	-0.297694	0.301278	0.266983	0.356149
SASH1	blue	-0.780923	0.000977161	0.0283005	0.923492	-0.562044	0.0364495	0.563845	0.0357241	-0.453518	0.10337	-0.373534	0.18832	-0.41061	0.14474	0.470469	0.0895524	-0.470699	0.0893747	0.355043	0.212884	-0.231061	0.426735	0.0687989	0.81522
VAT1L	blue	-0.779914	0.00100211	-0.403508	0.152511	-0.659265	0.010326	0.459087	0.0986786	-0.227652	0.433779	-0.0815876	0.781571	-0.117465	0.689211	0.666286	0.0092722	-0.602121	0.0226981	0.417578	0.137375	-0.0884087	0.763763	0.341396	0.232241
Z99129.4	blue	-0.779865	0.00100332	0.0770208	0.793549	-0.547958	0.0425008	0.554501	0.0396051	-0.597055	0.0241764	-0.184423	0.527933	-0.464498	0.0942636	0.529343	0.0515879	-0.577268	0.030651	0.390552	0.167388	-0.141757	0.628807	-0.165189	0.572513
MASP1	blue	-0.779573	0.00101064	-0.472357	0.0880979	-0.680962	0.00733852	0.381774	0.177986	-0.11755	0.688998	-0.179912	0.538248	0.021888	0.940796	0.650544	0.0117605	-0.564416	0.0354965	0.245882	0.396798	0.0247225	0.933144	0.344345	0.227969
TOM1L1	blue	-0.778741	0.00103175	-0.175567	0.548268	-0.720768	0.00363261	0.508525	0.0633326	-0.139505	0.634323	-0.58411	0.0282817	-0.143405	0.62478	0.353203	0.215433	-0.25849	0.372226	-0.00715472	0.980634	0.147534	0.614736	0.333059	0.244582
FXYD5	blue	-0.778558	0.00103643	0.1851	0.526393	-0.851874	0.000109972	0.860326	7.87985e-05	-0.428682	0.126165	-0.407015	0.14864	-0.573438	0.0320401	0.0164577	0.955469	0.0249102	0.932637	0.357626	0.209338	-0.354227	0.214012	0.372099	0.190158
SLC2A10	blue	-0.778544	0.0010368	-0.196328	0.50114	-0.517987	0.0577792	0.393259	0.164205	-0.5377	0.0473493	-0.0308381	0.916653	-0.213551	0.463523	0.744161	0.00227252	-0.77836	0.00104151	0.348938	0.221414	-0.0128111	0.965329	-0.214195	0.462142
ADGRG1	blue	-0.776974	0.00107769	-0.52399	0.0544431	-0.611243	0.0202089	0.30384	0.290922	-0.376922	0.184026	-0.189489	0.516456	0.139195	0.635083	0.679465	0.00752001	-0.616431	0.0188886	0.00762031	0.979374	0.099511	0.735014	-0.157913	0.589769
BDKRB1	blue	-0.776555	0.00108885	-0.422463	0.132365	-0.687187	0.00662002	0.441865	0.11368	-0.161011	0.582395	-0.280831	0.330767	-0.0144301	0.960951	0.550528	0.0413453	-0.449917	0.106484	0.198958	0.495305	-0.0400143	0.891969	0.366364	0.197619
CNTNAP3P2	blue	0.776475	0.00109098	-0.0441627	0.880838	0.844544	0.000144508	-0.647071	0.0123728	0.333509	0.243906	0.763114	0.00149776	0.175961	0.547354	0.0319494	0.913659	-0.117882	0.688159	0.316614	0.270073	-0.129194	0.659804	-0.028194	0.923779
NUB1	blue	-0.776073	0.00110177	-0.440608	0.114833	-0.660637	0.0101131	0.34592	0.225709	-0.0833127	0.777057	-0.400871	0.155466	0.0480251	0.870493	0.617685	0.0185796	-0.524785	0.0540119	0.0258408	0.930126	0.276931	0.33781	0.24788	0.39285
FOXP4	blue	-0.775623	0.00111392	-0.368232	0.195169	-0.649617	0.0119217	0.457994	0.0995877	-0.199795	0.493455	-0.0843151	0.774438	-0.143918	0.623529	0.670695	0.00865426	-0.610213	0.020479	0.482869	0.0802999	-0.16404	0.575222	0.399345	0.157192
MYO1E	blue	-0.775443	0.00111885	0.308846	0.282643	-0.57539	0.0313267	0.670957	0.00861863	-0.60428	0.0220893	-0.244219	0.4001	-0.649397	0.0119602	0.418204	0.136726	-0.487842	0.0767862	0.527345	0.0526404	-0.25061	0.387486	-0.0313015	0.915404
NPR2	blue	-0.774978	0.00113156	-0.464036	0.0946346	-0.710088	0.00443469	0.389346	0.168819	-0.137749	0.638637	-0.389089	0.169124	0.1083	0.712479	0.520063	0.0566092	-0.396375	0.160589	0.0103493	0.971989	0.0647754	0.825871	0.311476	0.278348
HMCN2	blue	-0.774713	0.00113889	-0.276414	0.33875	-0.797256	0.000637724	0.541733	0.0453973	-0.153696	0.599865	-0.209562	0.47211	-0.132152	0.652458	0.435559	0.119542	-0.361006	0.204754	0.254474	0.379962	0.044863	0.878961	0.364631	0.199908
KLF7	blue	-0.774551	0.00114336	0.174038	0.551812	-0.615871	0.0190278	0.603526	0.0223003	-0.207396	0.476806	-0.393224	0.164245	-0.549106	0.0419818	0.490935	0.0746557	-0.504467	0.065828	0.498031	0.0699284	0.0127064	0.965612	0.387343	0.171213
GRAMD4	blue	-0.774265	0.00115134	-0.395128	0.16203	-0.569252	0.0336114	0.388101	0.170304	-0.328706	0.251181	-0.00575434	0.984424	-0.12285	0.675657	0.779971	0.00100068	-0.755514	0.00177798	0.433235	0.121753	-0.0622436	0.832588	0.147853	0.613963
SNX18	blue	-0.774033	0.0011578	-0.26815	0.35397	-0.73907	0.0025269	0.472069	0.088319	-0.123887	0.673055	-0.494706	0.0721162	-0.041903	0.886899	0.415631	0.139407	-0.308739	0.282818	-0.00156331	0.995768	0.177763	0.543193	0.381439	0.178398
TRIM34	blue	-0.773999	0.00115877	-0.284984	0.323359	-0.586308	0.0275505	0.337144	0.238487	-0.311115	0.278936	-0.418822	0.136088	0.0230489	0.937661	0.598904	0.0236287	-0.542917	0.0448359	0.0215283	0.941767	0.0503628	0.864241	-0.0260582	0.929539
CDH24	blue	-0.773063	0.00118526	-0.347853	0.222952	-0.693974	0.00590023	0.42032	0.134548	-0.159393	0.586242	-0.0993998	0.735301	-0.0897519	0.760269	0.66763	0.0090804	-0.61882	0.0183031	0.283357	0.32625	0.235748	0.417147	0.267334	0.355493
SOX9	blue	-0.772393	0.00120451	-0.456216	0.101078	-0.664731	0.00949819	0.418092	0.136843	-0.206496	0.478764	-0.171615	0.557448	0.00060319	0.998367	0.615091	0.0192231	-0.526056	0.0533275	0.234302	0.420092	-0.0247694	0.933017	0.283675	0.325684
FAM131A	blue	-0.771964	0.00121695	-0.42258	0.132247	-0.552923	0.0402897	0.316904	0.26961	-0.459491	0.0983438	-0.183056	0.531051	0.0528016	0.857726	0.695579	0.00573939	-0.649427	0.0119549	0.0617116	0.834	0.0441037	0.880996	-0.135025	0.645349
NT5C	blue	-0.77077	0.00125217	-0.377204	0.183671	-0.817424	0.000356357	0.507132	0.0641814	-0.290235	0.314128	-0.346019	0.225567	0.0551387	0.851491	0.308256	0.283611	-0.198174	0.497041	-0.13253	0.651522	0.15781	0.590013	0.102172	0.728169
PXYLP1	blue	-0.770192	0.00126952	-0.033749	0.908814	-0.668356	0.00897796	0.638443	0.013999	-0.376694	0.184313	-0.0210982	0.942929	-0.471624	0.088661	0.520124	0.0565751	-0.525174	0.0538017	0.684486	0.00692476	-0.303003	0.292319	0.365368	0.198933
DLL4	blue	-0.769445	0.0012922	-0.235238	0.418185	-0.576493	0.0309286	0.467155	0.092146	-0.59695	0.0242077	-0.0637924	0.828478	-0.191286	0.51241	0.584782	0.0280567	-0.584443	0.0281702	0.3269	0.253952	-0.262166	0.365219	-0.116194	0.692423
ART4	blue	-0.769318	0.00129609	-0.431081	0.123828	-0.598407	0.023775	0.28828	0.317547	-0.10951	0.709394	-0.369047	0.194106	0.0809514	0.783237	0.70256	0.00507875	-0.618777	0.0183135	0.0761025	0.795963	0.198875	0.495489	0.215614	0.45911
MAP3K6	blue	-0.769059	0.00130407	0.0764322	0.795096	-0.691239	0.00618253	0.661304	0.0100109	-0.700299	0.0052859	-0.0503663	0.864231	-0.452237	0.104471	0.325413	0.256245	-0.378309	0.182286	0.274435	0.34236	-0.0539345	0.854703	-0.265082	0.359715
KRT8	blue	-0.768145	0.00133247	-0.52336	0.0547861	-0.716055	0.00397113	0.419213	0.135685	-0.213908	0.462758	-0.170268	0.560592	0.0658428	0.823043	0.565529	0.0350561	-0.461778	0.0964652	0.128746	0.660919	0.0584276	0.842731	0.242802	0.402927
PCMTD2	blue	-0.767732	0.00134545	-0.334968	0.241721	-0.585362	0.0278633	0.336564	0.239346	-0.140605	0.631626	-0.32946	0.250031	-0.029039	0.921501	0.708075	0.00460024	-0.639475	0.0137963	0.193061	0.508429	0.155137	0.596406	0.277802	0.33623
CAPN5	blue	-0.767265	0.00136026	-0.507809	0.0637679	-0.564771	0.0353554	0.285888	0.32176	-0.29232	0.310504	-0.00684669	0.981467	0.0414163	0.888205	0.847208	0.000131063	-0.810077	0.00044394	0.270622	0.349378	0.138507	0.636773	0.034916	0.905673
WDR48	blue	-0.765788	0.00140798	-0.510658	0.0620488	-0.553057	0.0402311	0.257561	0.374009	-0.2138	0.462989	-0.254365	0.380173	0.122626	0.676218	0.748839	0.00205708	-0.674885	0.00809693	0.0925615	0.752974	0.085001	0.772647	0.0587547	0.841861
GPR176	blue	-0.765767	0.00140868	-0.49655	0.0708968	-0.609344	0.0207093	0.340305	0.233834	-0.160641	0.583273	-0.14973	0.60942	0.0275143	0.925612	0.753789	0.00184706	-0.675064	0.0080738	0.24426	0.40002	0.133233	0.649779	0.262228	0.365104
GRK6	blue	-0.765202	0.0014273	0.0334035	0.909744	-0.777943	0.00105231	0.774104	0.00115581	-0.666742	0.00920684	0.00733652	0.980142	-0.477871	0.0839442	0.183156	0.530822	-0.192496	0.509694	0.447276	0.108809	-0.44379	0.11193	0.0362485	0.902089
GTF2H2C	blue	-0.764483	0.00145125	0.191148	0.51272	-0.796531	0.000650425	0.710544	0.00439785	-0.283598	0.325822	-0.590681	0.0261375	-0.42735	0.127477	0.115849	0.693295	-0.0712558	0.808731	0.0368357	0.90051	0.173583	0.552868	0.142808	0.626236
GJA5	blue	-0.764347	0.00145581	0.215786	0.458744	-0.552218	0.0405985	0.572438	0.0324104	-0.358814	0.207719	-0.430218	0.124665	-0.528042	0.0522713	0.463846	0.0947875	-0.492722	0.073445	0.440615	0.114826	-0.148146	0.613254	0.192051	0.510694
LINC00632	blue	-0.764063	0.00146538	-0.427107	0.127717	-0.620281	0.0179518	0.361053	0.20469	-0.198545	0.496219	-0.237498	0.413595	0.00884562	0.976058	0.686843	0.00665823	-0.610459	0.0204144	0.180165	0.537668	0.119044	0.685227	0.131166	0.654903
LITAF	blue	-0.762608	0.00151526	-0.598112	0.0238621	-0.664631	0.0095128	0.301301	0.295175	-0.206205	0.479397	-0.303595	0.29133	0.230796	0.427282	0.598425	0.0237697	-0.481742	0.0811121	-0.112343	0.702186	0.195828	0.502252	0.0824	0.779444
RAD51D	blue	-0.762597	0.00151563	0.0935746	0.750349	-0.681728	0.00724705	0.562186	0.0363919	-0.553547	0.040018	-0.33341	0.244056	-0.308735	0.282825	0.303897	0.290827	-0.334102	0.243018	-0.0100755	0.97273	0.210131	0.470881	-0.273308	0.344427
PRKD1	blue	-0.762519	0.00151833	0.110419	0.707077	-0.545457	0.0436478	0.532238	0.0500897	-0.395697	0.161372	-0.150912	0.606566	-0.506126	0.0647996	0.623997	0.0170816	-0.6761	0.00794066	0.538498	0.0469585	-0.00579392	0.984317	0.0604729	0.837291
AC091729.3	blue	-0.760279	0.00159786	0.195125	0.503819	-0.779569	0.00101074	0.751822	0.00192836	-0.434111	0.120916	-0.472468	0.0880133	-0.487675	0.0769021	0.112896	0.70078	-0.0877197	0.765557	0.137529	0.639178	0.0281458	0.923909	0.137972	0.638089
EPG5	blue	-0.760166	0.00160196	-0.0193375	0.947685	-0.575125	0.0314227	0.526935	0.0528583	-0.301351	0.29509	-0.221171	0.447328	-0.412825	0.142371	0.614113	0.0194702	-0.612379	0.0199139	0.515995	0.0589181	-0.0616216	0.834239	0.234754	0.419171
JMJD8	blue	-0.760096	0.00160449	-0.442314	0.11327	-0.715822	0.0039885	0.414086	0.141034	-0.407843	0.147736	-0.248633	0.391366	0.102974	0.72611	0.446706	0.109315	-0.362871	0.202252	-0.150109	0.608505	0.201079	0.490624	-0.0972383	0.740874
PLCL1	blue	-0.760064	0.00160565	-0.236711	0.41519	-0.492473	0.0736127	0.323607	0.259047	-0.517066	0.0583036	-0.163268	0.577048	-0.0966732	0.742334	0.706499	0.00473321	-0.724113	0.00340643	0.115132	0.69511	0.12615	0.667394	-0.36952	0.19349
BTN3A1	blue	-0.759893	0.00161188	0.0657053	0.823407	-0.688803	0.00644282	0.583762	0.0283989	-0.225342	0.438583	-0.23606	0.416513	-0.430054	0.124824	0.422875	0.131948	-0.431954	0.122984	0.429119	0.125737	0.00237817	0.993562	0.307778	0.284397
SLC29A3	blue	-0.758807	0.00165188	-0.500124	0.0685754	-0.741221	0.00241682	0.431539	0.123385	-0.293105	0.309147	-0.174671	0.550343	0.0978151	0.739386	0.447983	0.108183	-0.341063	0.232726	0.041491	0.888004	-0.0485583	0.869066	0.166989	0.568276
GOLPH3L	blue	-0.758491	0.00166365	-0.34964	0.220423	-0.5161	0.0588573	0.235219	0.418223	-0.164674	0.573728	-0.366085	0.197986	0.0533119	0.856364	0.765246	0.00142584	-0.719916	0.00369204	0.0648145	0.825767	0.254725	0.379476	0.0493494	0.86695
ARHGAP20	blue	-0.757769	0.00169085	-0.502876	0.0668251	-0.627775	0.01623	0.359114	0.207312	-0.23793	0.412722	-0.191975	0.510864	0.0474115	0.872135	0.633533	0.0149946	-0.544232	0.0442177	0.190904	0.513268	-0.0562261	0.848593	0.224498	0.440346
CCDC134	blue	-0.75743	0.00170373	-0.349436	0.220711	-0.657859	0.0105477	0.497324	0.0703892	-0.318816	0.266571	-0.0632699	0.829864	-0.180933	0.535908	0.567674	0.0342182	-0.519003	0.0572044	0.359663	0.206568	-0.0553508	0.850926	0.211577	0.467762
CREBRF	blue	-0.757413	0.00170436	-0.436569	0.11859	-0.680007	0.00745389	0.349201	0.221043	0.00260308	0.992953	-0.523658	0.054624	0.109352	0.709798	0.511949	0.0612809	-0.382578	0.176997	-0.0694075	0.813612	0.226885	0.435372	0.353111	0.215561
PCK2	blue	-0.756945	0.00172228	-0.362252	0.20308	-0.765595	0.00141431	0.562705	0.0361822	-0.498834	0.069407	-0.166044	0.570499	-0.0574534	0.845324	0.274762	0.341763	-0.196004	0.501861	0.0206361	0.944177	-0.137076	0.640293	-0.0177061	0.952094
CBLN2	blue	-0.756468	0.00174069	-0.544236	0.0442157	-0.656822	0.0107135	0.317616	0.268476	-0.101605	0.729627	-0.243027	0.402477	0.14677	0.61659	0.649283	0.0119801	-0.537364	0.0475146	0.110487	0.706906	0.0798789	0.786047	0.316426	0.270373
ELOVL7	blue	-0.75629	0.00174761	-0.0156337	0.957696	-0.497095	0.0705392	0.436981	0.118203	-0.366408	0.197561	-0.367359	0.196311	-0.294269	0.307139	0.593736	0.0251834	-0.593714	0.02519	0.309031	0.282339	-0.0962645	0.743389	0.083038	0.777776
FZD4	blue	-0.755964	0.00176033	0.117772	0.688435	-0.487129	0.0772833	0.478917	0.0831724	-0.385523	0.173408	-0.387778	0.170691	-0.424314	0.130499	0.57589	0.0311456	-0.605157	0.0218453	0.360336	0.205658	-0.0382788	0.896631	0.0672379	0.819349
BCAP29	blue	-0.755564	0.00177604	0.179351	0.539538	-0.607115	0.0213083	0.517807	0.0578813	-0.184614	0.5275	-0.795618	0.000666719	-0.34324	0.229564	0.320889	0.263301	-0.287689	0.318584	0.0213185	0.942334	0.157184	0.591509	0.169444	0.562518
PITX1	blue	-0.755137	0.0017929	-0.482806	0.080345	-0.679277	0.00754303	0.408559	0.146957	-0.176005	0.547254	-0.101471	0.729972	0.00857055	0.976802	0.624341	0.0170027	-0.539076	0.0466768	0.245567	0.397422	0.0650654	0.825103	0.303761	0.291053
FOXL1	blue	-0.754608	0.00181401	-0.51486	0.0595741	-0.646307	0.0125105	0.320838	0.263381	-0.33723	0.238359	-0.073862	0.80186	0.109791	0.708677	0.652614	0.0114071	-0.603064	0.0224305	0.0415641	0.887808	0.214595	0.461287	-0.0759672	0.796319
PDE3B	blue	-0.751791	0.00192965	-0.438928	0.116385	-0.58422	0.0282448	0.30109	0.29553	-0.0195815	0.947026	-0.192484	0.509723	-0.0152821	0.958647	0.794928	0.000679249	-0.733345	0.00283928	0.302952	0.292404	0.218099	0.453822	0.35066	0.218987
FANCG	blue	-0.751751	0.00193133	-0.32896	0.250794	-0.625053	0.0168402	0.352994	0.215724	-0.285463	0.322511	-0.114329	0.697146	-0.0486743	0.868756	0.675293	0.00804427	-0.656128	0.0108256	0.0998429	0.734159	0.396757	0.16015	-0.0833115	0.777061
TSPAN31	blue	-0.750555	0.00198221	-0.47134	0.0888796	-0.619958	0.0180291	0.308279	0.283573	-0.235859	0.416922	-0.386431	0.172311	0.174525	0.550681	0.56319	0.0359869	-0.453556	0.103337	-0.0712381	0.808777	0.0542428	0.853881	0.0796352	0.786686
KLHL24	blue	-0.75032	0.00199236	-0.372837	0.189211	-0.556828	0.0386106	0.312283	0.277039	-0.112744	0.701167	-0.4524	0.10433	0.0355573	0.903948	0.632831	0.0151413	-0.539941	0.0462574	0.0870757	0.767235	0.0499365	0.86538	0.281056	0.330364
BAG2	blue	-0.749669	0.00202061	-0.385287	0.173693	-0.606053	0.0215983	0.346213	0.225289	0.010275	0.97219	-0.34796	0.222801	-0.0290282	0.92153	0.676306	0.00791449	-0.588381	0.0268737	0.207179	0.477277	0.197259	0.49907	0.404174	0.151771
STK40	blue	-0.749581	0.00202442	-0.45198	0.104693	-0.615302	0.0191701	0.374339	0.187294	-0.45	0.106412	0.110583	0.70666	-0.00676844	0.981679	0.688709	0.00645297	-0.657829	0.0105525	0.314427	0.273578	-0.102834	0.726471	0.00526412	0.985751
SLC16A5	blue	-0.749563	0.00202521	-0.29721	0.302101	-0.615263	0.01918	0.450157	0.106275	-0.198267	0.496835	-0.10637	0.717409	-0.22222	0.445122	0.654753	0.0110503	-0.625129	0.0168229	0.425723	0.12909	0.0389281	0.894886	0.260507	0.368374
GLUD2	blue	-0.749178	0.00204211	-0.251711	0.385334	-0.557863	0.0381747	0.35065	0.219001	-0.23028	0.428344	-0.112797	0.701031	-0.146309	0.617709	0.730563	0.00300171	-0.723535	0.00344473	0.307183	0.285378	0.182756	0.531736	0.120266	0.682149
MXI1	blue	-0.748627	0.00206648	-0.0277494	0.924978	-0.729929	0.00303972	0.605013	0.0218851	-0.206488	0.478781	-0.503975	0.0661351	-0.263009	0.363623	0.247979	0.392654	-0.163888	0.575582	0.167744	0.566503	-0.126386	0.666804	0.320622	0.26372
ALDH5A1	blue	-0.748437	0.00207495	-0.379075	0.18133	-0.571402	0.0327975	0.362615	0.202594	-0.162774	0.578218	-0.0745287	0.800104	-0.0897286	0.76033	0.751822	0.00192834	-0.707559	0.00464347	0.450157	0.106275	-0.0670413	0.819869	0.336754	0.239064
PRRT3	blue	-0.747951	0.00209667	0.174267	0.55128	-0.832211	0.000222116	0.882206	2.97849e-05	-0.679906	0.00746623	-0.029922	0.919121	-0.606513	0.0214723	0.0215693	0.941656	-0.0315128	0.914835	0.485646	0.0783244	-0.50162	0.0676198	0.118442	0.686746
BMP1	blue	-0.747924	0.00209789	0.115659	0.693778	-0.65635	0.0107895	0.699551	0.00535584	-0.401814	0.154405	-0.0173072	0.953172	-0.633072	0.0150907	0.444031	0.111712	-0.480611	0.0819325	0.756102	0.00175494	-0.306463	0.286566	0.312555	0.276599
SEMA4D	blue	-0.747215	0.00212993	-0.202098	0.488383	-0.61708	0.0187281	0.446169	0.109794	-0.100406	0.73271	-0.199259	0.494641	-0.221934	0.445723	0.633811	0.0149367	-0.588224	0.0269246	0.471111	0.0890562	-0.0429537	0.88408	0.479811	0.0825165
PTTG1	blue	-0.74651	0.00216222	-0.100182	0.733286	-0.697313	0.00556932	0.473626	0.0871295	-0.191282	0.51242	-0.654201	0.0111415	-0.139068	0.635396	0.311678	0.278021	-0.243466	0.401602	-0.188062	0.519677	0.397201	0.159639	0.0788141	0.78884
ARSI	blue	-0.746367	0.00216882	-0.561786	0.036554	-0.650895	0.0117001	0.325003	0.256879	-0.11147	0.704403	-0.227726	0.433625	0.140625	0.631576	0.620369	0.017931	-0.511103	0.061783	0.101748	0.729258	0.0600403	0.838441	0.304897	0.289161
SCN5A	blue	-0.746015	0.00218508	-0.228196	0.43265	-0.666008	0.00931237	0.404132	0.151818	-0.429848	0.125025	-0.272572	0.34578	-0.0242686	0.934369	0.458749	0.0989591	-0.434411	0.12063	-0.128562	0.661378	0.353707	0.214733	-0.246726	0.395127
ADD2	blue	-0.745724	0.00219864	-0.255696	0.377599	-0.610974	0.0202793	0.362647	0.202552	-0.157924	0.589743	-0.278332	0.335269	-0.10223	0.72802	0.637639	0.0141584	-0.611747	0.0200777	0.10204	0.728509	0.42622	0.128595	0.100583	0.732253
ITGB5	blue	-0.745508	0.00220873	-0.0139197	0.962331	-0.820436	0.000324754	0.724847	0.00335836	-0.440988	0.114483	-0.189546	0.516327	-0.36401	0.200733	0.146553	0.617116	-0.117534	0.689038	0.225405	0.438453	-0.0950635	0.746494	0.102745	0.726698
CDC42EP4	blue	-0.744969	0.00223408	-0.545779	0.0434991	-0.724304	0.00339388	0.368267	0.195122	-0.15926	0.586557	-0.229816	0.429301	0.149599	0.609738	0.519313	0.0570296	-0.410275	0.145101	-0.048958	0.867997	0.243155	0.402222	0.130836	0.655723
AC068473.5	blue	-0.74444	0.0022592	-0.445385	0.110495	-0.672321	0.00843456	0.36042	0.205544	-0.0777359	0.791671	-0.328105	0.252101	0.0874583	0.766238	0.569345	0.0335757	-0.456803	0.100584	0.0295629	0.920089	0.236698	0.415217	0.322069	0.261449
RNF123	blue	-0.744231	0.00226918	-0.411929	0.143327	-0.593359	0.0252996	0.398205	0.15849	-0.52991	0.0512915	0.129543	0.658935	-0.0504285	0.864065	0.6387	0.0139483	-0.623662	0.0171587	0.329554	0.249888	-0.214649	0.461171	-0.0966568	0.742376
TOR4A	blue	-0.744087	0.0022761	0.113734	0.698655	-0.755183	0.00179107	0.803248	0.000540131	-0.743145	0.00232158	0.0163469	0.955768	-0.530924	0.0507654	0.133068	0.650189	-0.147377	0.615117	0.514339	0.059877	-0.613788	0.0195528	0.0546198	0.852875
DRAM1	blue	-0.743979	0.00228124	-0.310195	0.280435	-0.575595	0.0312523	0.271271	0.348177	-0.0426278	0.884954	-0.54174	0.0453942	0.0567397	0.847225	0.644169	0.0129026	-0.562326	0.0363352	-0.0703613	0.811092	0.41275	0.14245	0.18075	0.536326
LUM	blue	-0.743688	0.00229526	0.0767279	0.794319	-0.741563	0.00239966	0.754105	0.00183424	-0.38993	0.168124	-0.0697681	0.812659	-0.548385	0.0423074	0.270713	0.34921	-0.26066	0.368082	0.65802	0.0105222	-0.454945	0.102154	0.407563	0.148041
SULF1	blue	-0.743573	0.00230084	-0.352835	0.215945	-0.624286	0.0170151	0.417381	0.13758	-0.0835407	0.776461	-0.165998	0.570606	-0.115428	0.694362	0.659556	0.0102806	-0.585606	0.0277826	0.445695	0.110217	-0.0943114	0.748441	0.504792	0.0656254
CRTAC1	blue	-0.743278	0.00231511	-0.496616	0.0708537	-0.616433	0.0188881	0.268274	0.353738	-0.148732	0.611834	-0.42109	0.133761	0.193254	0.507998	0.570124	0.0332795	-0.466999	0.0922699	-0.109669	0.708989	0.150309	0.608021	0.129364	0.659381
SLC9A3R1	blue	-0.743157	0.00232103	-0.205917	0.480024	-0.793873	0.000698769	0.612438	0.0198987	-0.303607	0.291311	0.0101183	0.972614	-0.268127	0.354012	0.357539	0.209457	-0.32066	0.26366	0.398231	0.158461	-0.106932	0.715972	0.307217	0.285321
NFE2L3	blue	-0.743103	0.00232363	0.369697	0.19326	-0.601	0.0230192	0.70697	0.00469318	-0.531687	0.0503719	-0.482374	0.0806558	-0.63473	0.0147469	0.200245	0.492463	-0.230684	0.427511	0.385897	0.172955	-0.353611	0.214867	0.106012	0.718326
CMTM6	blue	-0.741213	0.00241722	-0.235221	0.41822	-0.519323	0.057024	0.284544	0.324139	-0.291252	0.312358	-0.381297	0.178574	-0.0210255	0.943125	0.641732	0.0133609	-0.617119	0.0187187	0.0385768	0.89583	0.154497	0.59794	-0.0980196	0.738858
CDA	blue	-0.741071	0.0024244	0.00649536	0.982418	-0.82031	0.000326027	0.658714	0.0104124	-0.399887	0.156577	-0.184179	0.528491	-0.313346	0.27532	0.191587	0.511733	-0.166235	0.570048	0.20464	0.482811	-0.0264574	0.928462	0.128628	0.661212
DCAF8	blue	-0.741053	0.0024253	0.0400545	0.891861	-0.759388	0.00163039	0.577144	0.0306953	0.0207284	0.943928	-0.614926	0.0192648	-0.288234	0.317627	0.252175	0.38443	-0.178274	0.542017	0.140093	0.632879	0.160232	0.584245	0.502108	0.0673101
MEGF10	blue	-0.741	0.00242795	-0.147615	0.614541	-0.587183	0.0272632	0.473378	0.0873179	-0.589334	0.0265669	-0.17966	0.538828	-0.196451	0.500866	0.440848	0.114612	-0.442034	0.113525	0.0749209	0.799071	0.00553968	0.985005	-0.365074	0.199321
GYG2	blue	-0.740816	0.00243726	-0.490525	0.0749357	-0.709081	0.00451692	0.33477	0.242018	-0.211497	0.467935	-0.352277	0.216723	0.204731	0.482613	0.447287	0.108799	-0.336449	0.239517	-0.183497	0.530043	0.190869	0.513347	0.0442024	0.880731
CAND2	blue	-0.740509	0.00245282	-0.364298	0.200351	-0.571859	0.0326264	0.403234	0.152816	-0.536206	0.0480878	0.0847563	0.773285	-0.0944028	0.748204	0.648502	0.0121175	-0.640438	0.0136092	0.286263	0.321096	-0.0850409	0.772543	-0.11809	0.687634
MMP16	blue	-0.739926	0.00248266	-0.210742	0.469562	-0.507139	0.0641773	0.357295	0.20979	-0.141758	0.628804	-0.131617	0.653784	-0.242307	0.403916	0.806685	0.000489816	-0.803567	0.000535288	0.514449	0.0598127	0.0693284	0.813821	0.289663	0.315127
GALNT10	blue	-0.739587	0.00250011	0.125543	0.668912	-0.550775	0.0412355	0.588279	0.0269067	-0.387996	0.17043	-0.113078	0.700318	-0.559126	0.0376473	0.54566	0.0435538	-0.588463	0.0268474	0.709698	0.00446642	-0.321079	0.263001	0.254071	0.380743
CSRNP1	blue	-0.739573	0.00250081	-0.189919	0.515487	-0.569703	0.0334392	0.499852	0.0687502	-0.702043	0.00512553	0.119552	0.683948	-0.236871	0.414866	0.549029	0.0420166	-0.569947	0.0333465	0.443523	0.112172	-0.412345	0.142882	-0.162887	0.57795
NACAD	blue	-0.739326	0.00251359	-0.346573	0.224775	-0.715566	0.00400765	0.54857	0.0422237	-0.431956	0.122982	-0.177418	0.54399	-0.0947302	0.747357	0.313558	0.274977	-0.233149	0.422451	0.188064	0.519673	-0.342375	0.230817	0.110849	0.705985
PDE1C	blue	-0.738997	0.00253069	0.16017	0.584394	-0.75907	0.00164212	0.703323	0.00501038	-0.439587	0.115775	-0.420338	0.134529	-0.400166	0.156261	0.10306	0.725889	-0.0752878	0.798106	0.213988	0.462586	-0.247527	0.393545	0.239939	0.408668
USP4	blue	-0.738879	0.00253688	-0.277843	0.336156	-0.509653	0.0626511	0.31991	0.264843	-0.420821	0.134035	-0.199714	0.493634	-0.0938532	0.749627	0.692119	0.00609058	-0.697056	0.00559428	0.0891194	0.761914	0.252772	0.383267	-0.293252	0.308893
AC006333.2	blue	-0.738828	0.00253952	0.0407337	0.890037	-0.73999	0.00247933	0.559099	0.0376584	-0.27428	0.342645	-0.538777	0.0468222	-0.200507	0.491885	0.199913	0.493196	-0.139215	0.635035	-0.0146874	0.960255	0.0325561	0.912025	0.128942	0.660432
RASGEF1B	blue	-0.738651	0.00254879	-0.413256	0.141914	-0.696659	0.00563299	0.432617	0.122346	-0.171842	0.556918	-0.292086	0.31091	0.033925	0.90834	0.431819	0.123114	-0.32055	0.263834	0.138176	0.637586	-0.165433	0.571937	0.343774	0.228792
NPPB	blue	-0.738628	0.00255002	-0.393034	0.164466	-0.660463	0.01014	0.427367	0.12746	-0.0528416	0.85762	-0.223728	0.441957	-0.064959	0.825384	0.573876	0.0318792	-0.476028	0.0853174	0.339314	0.235286	-0.0854059	0.77159	0.516992	0.0583458
FBXO4	blue	-0.73861	0.00255098	-0.150207	0.608268	-0.596061	0.0244746	0.404203	0.151739	-0.316789	0.269794	-0.563729	0.0357705	-0.0460305	0.875833	0.40262	0.153502	-0.334016	0.243146	-0.0918995	0.754692	0.0599022	0.838808	0.0952169	0.746098
MOV10	blue	-0.738315	0.00256645	-0.351675	0.217564	-0.537028	0.0476802	0.34975	0.220268	-0.378475	0.182079	0.108798	0.711209	-0.135246	0.644805	0.789067	0.000793454	-0.801725	0.000563709	0.399252	0.157298	0.0842688	0.774559	-0.0355185	0.904052
B4GALT1	blue	-0.738265	0.00256914	-0.407656	0.147939	-0.654128	0.0111536	0.391912	0.165783	-0.136062	0.642792	-0.457873	0.0996888	0.0475153	0.871857	0.453519	0.103369	-0.332233	0.245827	-0.0186218	0.949619	0.0545939	0.852944	0.32745	0.253106
NIPAL1	blue	-0.738254	0.00256969	-0.40003	0.156416	-0.488547	0.0762969	0.251919	0.384929	-0.309927	0.280873	-0.141564	0.629278	0.0139342	0.962292	0.797877	0.00062699	-0.771206	0.00123922	0.234375	0.419945	0.0284997	0.922955	0.00453262	0.98773
ERI1	blue	-0.737961	0.00258522	-0.273299	0.344444	-0.458325	0.0993119	0.282733	0.327362	-0.251	0.386723	-0.113167	0.700094	-0.13126	0.65467	0.856351	9.24103e-05	-0.865905	6.24866e-05	0.37663	0.184393	0.124947	0.670403	0.0254415	0.931203
LIFR-AS1	blue	-0.737941	0.00258627	-0.323427	0.259328	-0.766459	0.00138616	0.442922	0.112717	-0.124345	0.671908	-0.2597	0.369913	-0.0287989	0.922148	0.425475	0.129337	-0.348408	0.222165	0.0324839	0.91222	0.30054	0.296456	0.249844	0.388987
PGGHG	blue	-0.73781	0.00259321	-0.0381495	0.896978	-0.854362	9.99073e-05	0.690843	0.0062243	-0.356704	0.2106	-0.377747	0.18299	-0.270312	0.349952	0.0841967	0.774747	-0.0183661	0.95031	-0.00680304	0.981585	0.131563	0.653919	0.167042	0.568152
GDF3	blue	-0.737076	0.00263244	0.271709	0.34737	-0.605221	0.0218275	0.652567	0.011415	-0.379141	0.181246	-0.358696	0.20788	-0.587094	0.0272925	0.309285	0.281923	-0.334249	0.242796	0.525107	0.0538377	-0.361645	0.203894	0.282205	0.328305
NRG1	blue	-0.73697	0.00263817	-0.255981	0.377049	-0.641792	0.0133493	0.43764	0.117585	-0.0352983	0.904644	-0.225791	0.437649	-0.180299	0.537361	0.611027	0.0202655	-0.545024	0.0438485	0.428612	0.126234	-0.00660353	0.982125	0.527682	0.0524616
MCF2L	blue	-0.736761	0.00264945	0.0664226	0.821507	-0.68726	0.00661193	0.608598	0.0209082	-0.449704	0.10667	-0.148422	0.612584	-0.395374	0.161744	0.298455	0.299984	-0.307829	0.284313	0.354041	0.21427	-0.228676	0.431658	0.100226	0.733173
C1S	blue	-0.736294	0.00267478	-0.454205	0.102783	-0.586646	0.0274393	0.373211	0.188733	-0.394802	0.162408	-0.0942128	0.748696	0.0174715	0.952728	0.635897	0.0145088	-0.574646	0.0315973	0.190366	0.514479	-0.0522884	0.859096	-0.0144925	0.960782
LTBP1	blue	-0.735765	0.00270376	0.0638382	0.828356	-0.709606	0.00447389	0.71302	0.00420192	-0.291767	0.311463	-0.276146	0.339238	-0.492993	0.0732622	0.242421	0.403688	-0.201198	0.490363	0.552168	0.0406201	-0.449737	0.106641	0.547282	0.0428087
BRINP1	blue	-0.735763	0.00270386	-0.403442	0.152585	-0.718239	0.00381129	0.423546	0.13127	0.0334967	0.909493	-0.307449	0.284939	-0.0147298	0.96014	0.501873	0.067459	-0.39018	0.167828	0.179905	0.538265	0.120907	0.680537	0.500959	0.0680408
PLCD1	blue	-0.735434	0.00272198	-0.245829	0.396902	-0.797778	0.000628694	0.556482	0.0387572	-0.168371	0.565032	-0.261487	0.366508	-0.111405	0.704569	0.280423	0.331499	-0.189983	0.515342	0.11909	0.685112	0.0293959	0.920539	0.323775	0.258786
IFITM1	blue	-0.735343	0.00272702	-0.41468	0.140407	-0.717972	0.00383059	0.427016	0.127807	-0.174536	0.550656	-0.469379	0.0904003	0.101051	0.731051	0.339706	0.234711	-0.202662	0.487144	-0.0828879	0.778168	-0.0353602	0.904478	0.277185	0.337348
SERPINA5	blue	-0.734917	0.00275067	-0.440762	0.114691	-0.73857	0.00255305	0.458261	0.0993648	-0.22203	0.445521	-0.339798	0.234576	0.0862872	0.769291	0.343831	0.22871	-0.212346	0.466109	-0.0140671	0.961932	-0.0854588	0.771452	0.260717	0.367974
ISYNA1	blue	-0.7342	0.00279082	-0.419216	0.135681	-0.709321	0.00449717	0.438467	0.116814	-0.0900583	0.759473	-0.165238	0.572397	-0.0188113	0.949107	0.523607	0.0546518	-0.422653	0.132173	0.284999	0.323332	-0.0487708	0.868498	0.492754	0.0734232
PDGFRA	blue	-0.734173	0.00279236	-0.345293	0.226607	-0.657543	0.010598	0.488937	0.0760269	-0.14481	0.621355	-0.149911	0.608982	-0.150152	0.608401	0.53702	0.0476844	-0.451813	0.104836	0.433742	0.121269	-0.207503	0.476573	0.491258	0.0744361
CD248	blue	-0.734088	0.00279713	-0.509977	0.0624566	-0.680888	0.0073474	0.412934	0.142255	-0.21318	0.464318	-0.0486605	0.868793	0.0362354	0.902124	0.583034	0.0286449	-0.491401	0.0743389	0.279221	0.333665	-0.0893646	0.761276	0.30383	0.290939
TFEB	blue	-0.73341	0.00283557	-0.359371	0.206963	-0.702431	0.00509045	0.492117	0.0738533	-0.346132	0.225405	0.112347	0.702174	-0.151583	0.604948	0.551384	0.0409657	-0.515527	0.0591877	0.423201	0.131618	-0.104792	0.72145	0.174893	0.549828
MOCS1	blue	-0.731793	0.00292905	-0.548109	0.0424324	-0.632281	0.0152569	0.279229	0.33365	-0.240409	0.407723	-0.244279	0.399981	0.20503	0.481961	0.606047	0.0216	-0.512843	0.0607526	-0.103803	0.723983	0.268343	0.35361	0.0506773	0.8634
AMIGO2	blue	-0.731443	0.00294957	-0.308924	0.282514	-0.519224	0.05708	0.396309	0.160664	-0.29048	0.313701	-0.0244087	0.933991	-0.178108	0.5424	0.722124	0.00353959	-0.69183	0.00612073	0.526904	0.052875	-0.244102	0.400335	0.271815	0.347174
LINC00847	blue	-0.73143	0.00295033	-0.216014	0.458256	-0.722423	0.00351926	0.430005	0.124872	-0.111216	0.70505	-0.698735	0.0054329	0.0524519	0.85866	0.243819	0.400899	-0.121233	0.679717	-0.266043	0.357909	0.197539	0.498449	0.183108	0.530932
MVP	blue	-0.731342	0.00295551	0.150556	0.607426	-0.795117	0.000675791	0.852141	0.000108855	-0.645471	0.0126628	-0.175358	0.54875	-0.550772	0.041237	-0.0239071	0.935344	0.0413409	0.888407	0.41708	0.137893	-0.610487	0.0204069	0.147571	0.614646
MEF2D	blue	-0.731122	0.00296849	-0.343017	0.229887	-0.740845	0.00243581	0.546231	0.0432904	-0.269703	0.351082	-0.046043	0.875799	-0.137956	0.638128	0.40512	0.150723	-0.327835	0.252516	0.371341	0.191133	-0.262721	0.364168	0.36658	0.197334
SETD6	blue	-0.730564	0.00300165	-0.535737	0.0483213	-0.617659	0.018586	0.252991	0.382841	-0.128738	0.66094	-0.300582	0.296385	0.196	0.501869	0.654483	0.0110949	-0.557998	0.0381181	-0.130841	0.655711	0.434686	0.12037	0.0496462	0.866157
NAB2	blue	-0.729987	0.00303624	-0.400969	0.155355	-0.788662	0.000801872	0.525123	0.0538291	-0.189347	0.516776	-0.248505	0.391618	-0.0244847	0.933785	0.317127	0.269255	-0.201935	0.488741	0.0700838	0.811825	0.0323478	0.912586	0.310679	0.279646
OBSL1	blue	-0.728806	0.00310798	-0.503751	0.0662753	-0.723848	0.00342396	0.422586	0.13224	-0.247675	0.393252	-0.0458487	0.87632	0.0680057	0.817318	0.492539	0.0735678	-0.395223	0.161919	0.158647	0.588017	-0.0304932	0.917582	0.259712	0.36989
SLC29A2	blue	-0.728667	0.00311651	0.230028	0.428864	-0.661968	0.00990991	0.651375	0.0116177	-0.574663	0.031591	-0.0983651	0.737967	-0.5584	0.0379497	0.340515	0.233528	-0.413023	0.142161	0.362745	0.202421	0.0810196	0.783058	-0.182868	0.53148
CNNM4	blue	-0.728107	0.00315111	-0.291367	0.312158	-0.493756	0.07275	0.374472	0.187125	-0.277022	0.337645	-0.0674151	0.81888	-0.200723	0.491408	0.767717	0.00134594	-0.753319	0.00186624	0.48502	0.0787667	-0.0698585	0.81242	0.206836	0.478023
SNHG10	blue	-0.728024	0.00315626	-0.0779952	0.79099	-0.726051	0.00328059	0.501957	0.0674059	-0.368624	0.194657	-0.453508	0.103378	-0.155622	0.595245	0.253542	0.381769	-0.223844	0.441714	-0.213187	0.464303	0.440202	0.115206	-0.206291	0.47921
AL050341.2	blue	-0.728017	0.00315666	0.157946	0.589689	-0.695744	0.00572304	0.639305	0.0138295	-0.375167	0.186242	-0.585857	0.0276992	-0.422663	0.132163	0.143088	0.625553	-0.126904	0.665512	0.0123227	0.96665	0.138783	0.636095	-0.0452414	0.877947
YBX3	blue	-0.72794	0.00316146	-0.262914	0.363803	-0.800905	0.000576748	0.553781	0.0399161	-0.314579	0.273334	-0.227928	0.433206	-0.0707347	0.810106	0.237574	0.413442	-0.15125	0.605751	0.0875418	0.766021	-0.105625	0.719315	0.181101	0.535522
MPP2	blue	-0.726999	0.00322037	-0.443836	0.111889	-0.610029	0.0205276	0.380178	0.179958	-0.328837	0.250981	-0.0848675	0.772995	-0.00920106	0.975096	0.58627	0.0275631	-0.525528	0.0536113	0.161103	0.582177	0.047779	0.871151	0.090774	0.757613
PDCD4	blue	-0.72685	0.00322975	-0.537292	0.0475501	-0.562629	0.0362128	0.247017	0.394551	-0.023153	0.93738	-0.239128	0.410302	0.118827	0.685776	0.746456	0.0021647	-0.652899	0.011359	0.189161	0.517194	0.109476	0.709479	0.339695	0.234728
DSC3	blue	-0.726677	0.00324075	-0.146015	0.618424	-0.692951	0.0060047	0.577542	0.0305536	-0.107916	0.713459	-0.196076	0.501701	-0.324052	0.258355	0.453725	0.103193	-0.395593	0.161491	0.46761	0.0917874	-0.0478079	0.871074	0.493359	0.0730165
ATP8B2	blue	-0.72603	0.00328195	-0.0626713	0.831452	-0.502529	0.0670442	0.475534	0.0856879	-0.519514	0.0569171	0.0714241	0.808287	-0.404144	0.151805	0.656942	0.0106942	-0.718092	0.0038219	0.584028	0.0283094	-0.19818	0.497028	-0.104027	0.723409
PNRC1	blue	-0.72576	0.00329928	-0.199731	0.493597	-0.753075	0.00187624	0.543245	0.044681	-0.101605	0.729626	-0.519758	0.0567802	-0.0939945	0.749261	0.211745	0.467401	-0.0880424	0.764717	0.064472	0.826675	-0.13212	0.652536	0.473198	0.0874557
COL6A1	blue	-0.725355	0.00332535	-0.391259	0.166552	-0.6425	0.0132152	0.451252	0.105323	-0.328238	0.251897	0.0771239	0.793278	-0.128064	0.662618	0.627243	0.0163479	-0.588428	0.0268587	0.3837	0.175623	0.0114725	0.96895	0.143757	0.623922
TSPYL2	blue	-0.725166	0.00333759	0.0226371	0.938773	-0.769222	0.00129903	0.686586	0.00668695	-0.245873	0.396815	-0.141884	0.628496	-0.443753	0.111964	0.271086	0.348521	-0.238019	0.41254	0.483073	0.0801536	-0.14448	0.62216	0.496169	0.0711477
PTPRS	blue	-0.725018	0.0033472	-0.144847	0.621266	-0.635329	0.0146244	0.554606	0.0395595	-0.23676	0.415092	-0.116788	0.690921	-0.334167	0.242919	0.485354	0.0785303	-0.440288	0.115127	0.571243	0.0328569	-0.324137	0.258224	0.516585	0.0585788
TYSND1	blue	-0.725011	0.00334767	-0.527752	0.0524246	-0.682534	0.00715163	0.356227	0.211255	-0.241262	0.40601	-0.0749741	0.798931	0.13981	0.633574	0.556816	0.038616	-0.462645	0.0957594	0.100132	0.733415	0.0341162	0.907825	0.196942	0.499776
PHF19	blue	-0.724245	0.00339778	0.0268195	0.927486	-0.688192	0.00650931	0.591029	0.0260275	-0.564353	0.0355215	-0.112375	0.702103	-0.368861	0.194348	0.329564	0.249872	-0.364021	0.20072	0.152697	0.602267	0.187447	0.521068	-0.295484	0.305054
B4GALT4	blue	-0.724007	0.00341345	-0.223529	0.442374	-0.67601	0.00795215	0.475104	0.0860111	-0.134507	0.64663	-0.330444	0.248534	-0.109171	0.710258	0.438377	0.116897	-0.364453	0.200145	0.210892	0.469238	-0.000819701	0.997781	0.360009	0.206099
STAT5B	blue	-0.723242	0.00346424	-0.0464952	0.874588	-0.450385	0.106076	0.404662	0.15123	-0.570578	0.0331077	-0.0229246	0.937997	-0.332928	0.244779	0.702339	0.00509874	-0.769347	0.00129521	0.403115	0.152949	-0.0018263	0.995056	-0.271739	0.347314
CCDC80	blue	-0.722667	0.00350281	-0.0198908	0.94619	-0.670561	0.00867262	0.632692	0.0151704	-0.193627	0.507163	-0.0622016	0.832699	-0.4868	0.077513	0.462155	0.0961579	-0.447374	0.108722	0.708581	0.00455816	-0.248942	0.390758	0.567376	0.0343335
RILPL2	blue	-0.722621	0.0035059	-0.0397962	0.892554	-0.803996	0.00052885	0.689648	0.0063516	-0.12615	0.667394	-0.321159	0.262876	-0.361572	0.203993	0.178683	0.541075	-0.0985117	0.737589	0.387872	0.170578	-0.23049	0.42791	0.583597	0.0284544
AC004812.2	blue	-0.722305	0.00352731	-0.241333	0.405868	-0.775134	0.0011273	0.556567	0.0387212	-0.373757	0.188035	-0.359402	0.206922	-0.0782618	0.79029	0.19552	0.502938	-0.114331	0.697141	-0.120342	0.681958	0.143427	0.624726	0.021594	0.94159
LZTS1	blue	-0.722134	0.00353886	-0.475545	0.085679	-0.635711	0.0145465	0.431647	0.12328	-0.337424	0.238072	0.037987	0.897415	-0.026641	0.927967	0.577083	0.0307173	-0.508655	0.0632542	0.332558	0.245337	-0.178985	0.540379	0.184211	0.528417
GPR37	blue	-0.722043	0.00354506	0.311034	0.279068	-0.506137	0.0647928	0.587907	0.0270273	-0.697601	0.0055415	-0.208213	0.475033	-0.568977	0.0337163	0.37704	0.183877	-0.46574	0.0932692	0.382136	0.17754	-0.219385	0.451098	-0.278543	0.334889
LNPEP	blue	-0.721957	0.00355092	0.20951	0.472224	-0.505034	0.0654749	0.491503	0.0742698	-0.397548	0.159242	-0.463052	0.0954296	-0.424387	0.130425	0.469195	0.0905437	-0.502405	0.0671222	0.192666	0.509313	0.175287	0.548915	-0.0553038	0.851051
PLPP4	blue	-0.721822	0.00356014	-0.446229	0.10974	-0.66877	0.00892007	0.431422	0.123497	-0.166174	0.570191	-0.217344	0.455425	0.0134224	0.963676	0.489483	0.0756508	-0.379064	0.181342	0.226185	0.436827	-0.160436	0.583761	0.372343	0.189845
PARP12	blue	-0.721694	0.00356884	-0.565786	0.034955	-0.640182	0.0136587	0.313652	0.274826	-0.231921	0.424968	-0.13911	0.635293	0.173576	0.552884	0.569989	0.0333308	-0.48007	0.082327	0.00236976	0.993585	0.106902	0.71605	0.0756755	0.797086
MBTPS1	blue	-0.721364	0.0035915	0.0713965	0.808359	-0.453257	0.103594	0.473874	0.0869408	-0.458204	0.0994122	-0.0667846	0.820549	-0.482916	0.0802661	0.662424	0.00984108	-0.730854	0.00298441	0.609934	0.0205528	-0.175894	0.547509	0.00295728	0.991995
MAL2	blue	-0.721111	0.0036089	0.0250754	0.932191	-0.60277	0.0225136	0.569282	0.0335997	-0.296022	0.304132	-0.108349	0.712355	-0.448379	0.107833	0.479989	0.0823859	-0.483425	0.0799016	0.584156	0.0282664	-0.246348	0.395875	0.349334	0.220854
HEATR6	blue	-0.720838	0.00362776	-0.1323	0.652092	-0.443564	0.112135	0.376866	0.184096	-0.414815	0.140265	-0.0673144	0.819146	-0.298384	0.300104	0.730939	0.00297932	-0.765067	0.00143177	0.459728	0.0981478	-0.0838896	0.77555	-0.0455147	0.877215
GLB1L	blue	-0.720812	0.0036296	0.157907	0.589782	-0.502722	0.0669222	0.507203	0.0641379	-0.630338	0.0156708	-0.152755	0.602126	-0.438035	0.117216	0.476388	0.0850479	-0.550694	0.0412717	0.33596	0.240243	-0.0977397	0.73958	-0.239941	0.408663
ARHGAP1	blue	-0.719798	0.00370036	-0.295901	0.304338	-0.560878	0.0369246	0.417919	0.137021	-0.602079	0.02271	0.184611	0.527507	-0.158893	0.587432	0.627574	0.0162743	-0.650071	0.0118426	0.32254	0.260712	-0.0550462	0.851738	-0.22276	0.443987
WEE1	blue	-0.719269	0.00373774	0.0420976	0.886376	-0.490941	0.0746516	0.397193	0.159648	-0.171156	0.558519	-0.325921	0.255459	-0.361066	0.204673	0.667176	0.00914487	-0.694312	0.00586608	0.338169	0.236972	0.301441	0.29494	0.149013	0.611154
LIPG	blue	-0.718901	0.00376387	-0.263192	0.363278	-0.472546	0.087953	0.350971	0.218551	-0.242473	0.403585	-0.246774	0.395032	-0.156292	0.593641	0.699949	0.0053185	-0.668732	0.0089253	0.379112	0.181283	-0.120718	0.681013	0.196228	0.501361
CNNM2	blue	-0.717909	0.00383511	-0.278103	0.335685	-0.665948	0.00932101	0.498179	0.0698321	-0.179405	0.539415	-0.243853	0.400831	-0.133873	0.648198	0.442091	0.113473	-0.361188	0.204508	0.333408	0.244058	-0.209269	0.472745	0.400359	0.156044
HK2	blue	-0.717752	0.00384649	-0.321689	0.262044	-0.498276	0.0697686	0.309397	0.281739	-0.32212	0.261369	0.0160497	0.956572	-0.102563	0.727166	0.817182	0.000359008	-0.819635	0.000332936	0.38907	0.169147	0.0982672	0.738219	0.0420784	0.886428
USP53	blue	-0.716845	0.0039127	0.382682	0.176869	-0.575748	0.0311968	0.663778	0.00963866	-0.276109	0.339305	-0.399664	0.156831	-0.700544	0.00526307	0.335719	0.240603	-0.375941	0.185262	0.573795	0.0319089	-0.168587	0.564525	0.337939	0.237312
DENND1B	blue	-0.715863	0.00398546	0.048736	0.868591	-0.647525	0.0122913	0.590373	0.0262353	-0.337522	0.237927	-0.0168206	0.954488	-0.473226	0.0874338	0.483645	0.0797441	-0.51155	0.0615171	0.579175	0.0299762	-0.074064	0.801327	0.164813	0.573398
NCAPD2	blue	-0.715208	0.00403454	-0.276127	0.339272	-0.507106	0.0641973	0.315419	0.271985	-0.209714	0.471781	-0.0193945	0.947532	-0.173724	0.55254	0.80489	0.000515597	-0.817896	0.000351249	0.39484	0.162363	0.239897	0.408752	0.0615433	0.834447
THY1	blue	-0.715195	0.00403548	-0.542227	0.0451627	-0.611501	0.0201418	0.295835	0.304452	-0.317739	0.26828	0.0134268	0.963664	0.125503	0.669011	0.680559	0.00738703	-0.624476	0.0169717	0.102571	0.727144	0.179839	0.538418	-0.0751765	0.798399
MGARP	blue	-0.714964	0.00405288	-0.458274	0.0993539	-0.668624	0.00894043	0.427616	0.127214	-0.105285	0.720187	-0.169566	0.562233	-0.00477593	0.987072	0.510257	0.0622887	-0.403303	0.15274	0.269545	0.351374	-0.11345	0.699375	0.431149	0.123762
C1RL	blue	-0.714409	0.00409503	-0.044652	0.879526	-0.814659	0.000387512	0.621883	0.0175727	-0.163478	0.576552	-0.28202	0.328636	-0.256369	0.376301	0.200214	0.492532	-0.141888	0.628486	0.211142	0.4687	0.0233428	0.936868	0.355006	0.212935
PPP1R3C	blue	-0.714258	0.00410656	-0.456769	0.100613	-0.581204	0.0292707	0.363093	0.201956	-0.220151	0.449479	-0.0303279	0.918027	-0.0211358	0.942827	0.677908	0.00771243	-0.617215	0.0186948	0.350494	0.219221	-0.0581958	0.843348	0.245466	0.397623
PELI2	blue	-0.714219	0.00410951	-0.599423	0.0234766	-0.659282	0.0103234	0.280005	0.332252	-0.0555807	0.850313	-0.347759	0.223085	0.246593	0.39539	0.551461	0.040932	-0.411763	0.143504	-0.100951	0.731307	0.212663	0.465427	0.274947	0.341424
PTX3	blue	-0.714187	0.00411194	-0.417518	0.137437	-0.548024	0.0424709	0.357482	0.209535	-0.373256	0.188675	0.00250977	0.993206	-0.00507992	0.986249	0.644785	0.0127887	-0.597258	0.0241157	0.290649	0.313407	-0.165183	0.572527	0.113887	0.698267
ALDH3A2	blue	-0.713026	0.00420144	-0.2082	0.475061	-0.498291	0.0697593	0.310277	0.280302	-0.285352	0.322707	-0.28174	0.329138	-0.126585	0.666308	0.654941	0.0110194	-0.651107	0.0116636	0.0444542	0.880057	0.406105	0.149638	-0.130844	0.655704
UBE2C	blue	-0.712938	0.0042083	-0.0140164	0.96207	-0.706285	0.00475156	0.566731	0.0345848	-0.405837	0.149933	-0.100658	0.732061	-0.340713	0.233238	0.346615	0.224715	-0.368359	0.195003	0.180837	0.536127	0.259683	0.369946	-0.108359	0.712328
PLCB2	blue	-0.712379	0.00425195	-0.631503	0.0154217	-0.659411	0.0103031	0.256628	0.375802	-0.19522	0.503606	-0.199434	0.494253	0.288272	0.317562	0.576655	0.0308704	-0.465331	0.0935962	-0.139901	0.633351	0.250286	0.388121	0.0268666	0.927359
SPRED2	blue	-0.711806	0.00429712	0.161482	0.581277	-0.487997	0.0766784	0.55438	0.0396569	-0.465563	0.0934105	-0.102731	0.726733	-0.549683	0.0417228	0.537991	0.0472063	-0.603672	0.0222594	0.616974	0.0187543	-0.24527	0.398012	0.0369152	0.900296
SUSD5	blue	-0.711686	0.00430658	-0.235154	0.418357	-0.40559	0.150205	0.293555	0.308371	-0.332663	0.245178	-0.135134	0.645082	-0.163733	0.575948	0.814201	0.000392878	-0.818069	0.000349396	0.389666	0.168438	-0.0139181	0.962335	0.0416875	0.887477
SEMA3A	blue	-0.710893	0.00436982	-0.526155	0.0532747	-0.572157	0.0325152	0.294741	0.306328	-0.0568531	0.846923	-0.184431	0.527915	0.0808717	0.783446	0.704265	0.0049269	-0.608824	0.0208478	0.20774	0.476058	0.119663	0.683668	0.356727	0.210568
PPM1D	blue	-0.710441	0.00440612	-0.00556704	0.984931	-0.413856	0.141278	0.361272	0.204397	-0.333666	0.24367	-0.223901	0.441594	-0.317127	0.269255	0.695088	0.00578826	-0.734123	0.00279513	0.41936	0.135533	-0.0419543	0.886761	0.0499222	0.865419
TMEM121B	blue	-0.710254	0.00442121	-0.412709	0.142494	-0.603747	0.0222382	0.328666	0.251243	-0.229946	0.429033	-0.426526	0.128292	0.117792	0.688385	0.430832	0.124068	-0.342066	0.231266	-0.162185	0.579613	0.127696	0.663536	0.01138	0.969201
RNF150	blue	-0.710159	0.00442892	-0.471092	0.089071	-0.645958	0.0125738	0.365151	0.19922	-0.0663716	0.821642	-0.143894	0.623587	0.0315461	0.914745	0.607498	0.0212044	-0.512912	0.0607125	0.289462	0.315478	-0.00536667	0.985473	0.467286	0.0920428
GPX3	blue	-0.710093	0.00443424	-0.302056	0.293906	-0.701765	0.00515082	0.438709	0.116589	-0.0510178	0.862491	-0.316124	0.270855	-0.0445476	0.879806	0.446546	0.109457	-0.351294	0.218097	0.158898	0.58742	0.10743	0.714701	0.382328	0.177304
PIGM	blue	-0.709698	0.00446636	-0.402497	0.15364	-0.603336	0.0223539	0.277545	0.336696	-0.339425	0.235124	-0.435491	0.119606	0.18543	0.525642	0.444266	0.111501	-0.363902	0.200877	-0.315161	0.272399	0.251192	0.386348	-0.258102	0.37297
PHKA1	blue	-0.708354	0.004577	-0.172419	0.555575	-0.479664	0.0826242	0.388898	0.169353	-0.466102	0.0929814	-0.0281998	0.923763	-0.203829	0.484586	0.671956	0.00848355	-0.677688	0.00773994	0.404449	0.151466	-0.16539	0.572037	-0.0299434	0.919063
TRANK1	blue	-0.707516	0.00464711	-0.433045	0.121935	-0.54252	0.0450234	0.287347	0.319186	-0.0632178	0.830002	-0.25686	0.375357	0.0416445	0.887592	0.674695	0.00812162	-0.591758	0.0257981	0.248274	0.392072	-0.023496	0.936454	0.34502	0.226999
GNB4	blue	-0.707237	0.00467056	-0.505051	0.0654645	-0.485954	0.0781072	0.142547	0.626876	-0.114472	0.696784	-0.330703	0.248141	0.202779	0.486888	0.781866	0.000954302	-0.716228	0.0039583	-0.108944	0.710837	0.455099	0.102023	-0.0727667	0.804746
ACOT11	blue	-0.706941	0.00469563	-0.43208	0.122862	-0.700892	0.00523097	0.360241	0.205786	-0.0948094	0.747152	-0.226585	0.435996	0.0747905	0.799415	0.498064	0.0699065	-0.409159	0.146306	-0.0315453	0.914747	0.368018	0.195448	0.152348	0.603106
ABHD17C	blue	-0.706819	0.00470596	0.191892	0.51105	-0.655335	0.0109548	0.679802	0.00747884	-0.273313	0.344418	-0.340436	0.233642	-0.556475	0.0387604	0.24203	0.404472	-0.242004	0.404522	0.412282	0.142949	-0.0895789	0.760719	0.362045	0.203358
ELF4	blue	-0.706451	0.00473736	-0.474531	0.0864436	-0.549213	0.0419336	0.25971	0.369893	-0.414897	0.140179	-0.233308	0.422125	0.169924	0.561396	0.552532	0.0404607	-0.494923	0.0719716	-0.103161	0.72563	0.0375451	0.898603	-0.2434	0.401733
LETM2	blue	-0.706432	0.00473898	-0.379727	0.180518	-0.465911	0.0931336	0.21362	0.463374	-0.183541	0.529944	-0.451577	0.105041	0.0853704	0.771682	0.685999	0.00675272	-0.616514	0.0188681	-0.0630606	0.830419	0.261532	0.366423	-0.0356352	0.903738
DMD	blue	-0.706341	0.00474678	-0.141341	0.629824	-0.565995	0.0348729	0.486507	0.0777187	-0.25767	0.3738	-0.0274621	0.925753	-0.324071	0.258325	0.575152	0.0314128	-0.572004	0.0325722	0.631339	0.0154565	-0.326671	0.254304	0.327736	0.252666
MIR4453HG	blue	-0.705988	0.00477699	-0.204504	0.48311	-0.472845	0.0877244	0.333743	0.243555	-0.304693	0.289501	-0.292666	0.309906	-0.149345	0.610352	0.641159	0.0134703	-0.635962	0.0144955	0.141941	0.628356	0.195276	0.503481	-0.153732	0.599778
SAPCD2	blue	-0.705822	0.00479127	0.295601	0.304853	-0.68962	0.00635463	0.751696	0.00193369	-0.577719	0.0304904	-0.0097862	0.973513	-0.693335	0.00596533	0.22993	0.429065	-0.308597	0.28305	0.522763	0.0551135	-0.0974564	0.740311	-0.0295992	0.919991
SERPINB9	blue	-0.70582	0.00479148	-0.129933	0.657967	-0.429658	0.125211	0.35025	0.219563	-0.292585	0.310046	-0.161859	0.580383	-0.267489	0.355204	0.735726	0.00270587	-0.749051	0.00204772	0.491108	0.0745384	-0.124624	0.67121	0.164355	0.57448
CTNNAL1	blue	-0.705598	0.00481065	-0.446554	0.10945	-0.582571	0.0288023	0.281446	0.329665	0.0853889	0.771634	-0.236092	0.416447	0.0304472	0.917706	0.732821	0.00286936	-0.645357	0.0126836	0.276627	0.338363	0.208831	0.473694	0.469655	0.0901851
XRCC4	blue	-0.70508	0.0048555	-0.270398	0.349793	-0.660117	0.0101934	0.327764	0.252624	-0.0756712	0.797097	-0.733819	0.00281232	0.123462	0.674121	0.303287	0.291845	-0.197074	0.499482	-0.415309	0.139745	0.446384	0.109602	0.013905	0.962371
SRPX	blue	-0.704873	0.00487356	-0.450061	0.106358	-0.559821	0.0373592	0.319084	0.266148	-0.280292	0.331735	0.0689955	0.8147	-0.0317942	0.914077	0.746437	0.00216559	-0.71858	0.0037868	0.325653	0.255874	0.118774	0.685908	0.0611033	0.835616
HACL1	blue	-0.704811	0.004879	-0.162678	0.578443	-0.523091	0.0549333	0.340332	0.233794	-0.319931	0.264809	-0.541585	0.0454679	-0.0166892	0.954843	0.449042	0.10725	-0.396405	0.160554	-0.128389	0.661809	0.122236	0.677196	-0.0706401	0.810356
MLEC	blue	0.70457	0.00490004	0.169477	0.562441	0.751028	0.00196199	-0.471071	0.0890869	0.351281	0.218116	0.547714	0.0426117	-0.0407457	0.890005	-0.0965956	0.742534	0.0162572	0.956011	0.353724	0.214709	-0.141226	0.630106	0.152446	0.602871
MYCBP	blue	-0.704491	0.00490699	-0.0850392	0.772547	-0.688791	0.00644403	0.448451	0.107771	-0.154891	0.596996	-0.310418	0.280071	-0.179642	0.53887	0.409443	0.145998	-0.388258	0.170116	0.0721379	0.806404	0.381837	0.177908	0.0778167	0.791458
CDCA3	blue	-0.703115	0.00502895	0.0642089	0.827373	-0.668032	0.00902353	0.56903	0.033696	-0.357397	0.209651	-0.148571	0.612224	-0.419322	0.135572	0.356905	0.210324	-0.393642	0.163757	0.251544	0.38566	0.250623	0.387461	-0.0226993	0.938605
SLFN5	blue	-0.702983	0.00504074	-0.202956	0.4865	-0.597095	0.0241643	0.37014	0.192687	-0.02801	0.924275	-0.65633	0.0107929	-0.0148742	0.95975	0.382179	0.177487	-0.28536	0.322693	-0.10053	0.732391	0.183787	0.529382	0.265962	0.358061
MXRA8	blue	-0.702909	0.0050474	-0.515245	0.059351	-0.637097	0.0142668	0.36508	0.199315	-0.161744	0.580656	-0.134958	0.645515	0.0938202	0.749713	0.551346	0.0409824	-0.44349	0.112202	0.210212	0.470705	-0.122024	0.67773	0.345124	0.226849
YIPF5	blue	-0.702854	0.00505233	-0.235172	0.418319	-0.606539	0.0214653	0.416877	0.138105	-0.291317	0.312246	-0.533192	0.0496025	0.00986276	0.973306	0.3033	0.291823	-0.20627	0.479255	-0.0650769	0.825072	-0.170683	0.559622	0.101936	0.728776
WDR5B	blue	-0.702666	0.00506925	-0.291893	0.311245	-0.487502	0.0770226	0.310093	0.280601	-0.458723	0.0989806	-0.0841041	0.774989	-0.0452233	0.877995	0.661497	0.00998154	-0.64827	0.0121587	0.200587	0.49171	-0.0571593	0.846107	-0.201527	0.48964
FLNC	blue	-0.702328	0.00509978	-0.487856	0.076776	-0.604299	0.0220839	0.328421	0.251617	-0.038965	0.894787	-0.138026	0.637955	0.0285239	0.922889	0.685999	0.00675276	-0.597323	0.0240962	0.256744	0.37558	0.171073	0.55871	0.381215	0.178675
AP003396.5	blue	-0.701086	0.00521301	-0.414036	0.141087	-0.67954	0.00751088	0.428237	0.126602	-0.269768	0.350961	0.0185099	0.949922	-0.036144	0.90237	0.537079	0.0476551	-0.476593	0.0848948	0.270517	0.349572	0.0195221	0.947187	0.12376	0.673375
MYB	blue	-0.700868	0.00523314	-0.565475	0.0350773	-0.583337	0.0285422	0.22029	0.449185	-0.0367826	0.900652	-0.259544	0.37021	0.23219	0.424416	0.676818	0.00784943	-0.566657	0.0346134	0.0242839	0.934327	0.191194	0.512618	0.275905	0.339676
CPM	blue	-0.700562	0.0052614	-0.104716	0.721643	-0.724351	0.00339083	0.523214	0.0548661	0.011608	0.968584	-0.43312	0.121864	-0.201476	0.489752	0.319844	0.264947	-0.23172	0.42538	0.185181	0.526209	0.137737	0.638667	0.488058	0.0766358
ARAP2	blue	-0.700414	0.00527514	-0.451635	0.10499	-0.590511	0.0261916	0.328415	0.251627	-0.115635	0.693837	-0.0131048	0.964535	-0.0084391	0.977158	0.695636	0.00573367	-0.631058	0.0155164	0.382045	0.177652	-0.0163948	0.955639	0.353177	0.21547
ANOS1	blue	-0.699226	0.00538637	0.154374	0.598236	-0.530293	0.0510923	0.602032	0.0227235	-0.390155	0.167858	-0.229051	0.430881	-0.567501	0.0342853	0.409822	0.145588	-0.437808	0.117428	0.550509	0.0413539	-0.25082	0.387076	0.203885	0.484464
EFNB3	blue	-0.699101	0.00539821	-0.577217	0.0306694	-0.478615	0.0833949	0.139023	0.635506	-0.0769691	0.793685	-0.194774	0.504601	0.206227	0.47935	0.841871	0.000159098	-0.768508	0.00132112	0.0974312	0.740376	0.242237	0.404056	0.168195	0.565445
PNMA8A	blue	-0.698963	0.00541127	-0.428263	0.126576	-0.541198	0.0456528	0.241795	0.404942	-0.124172	0.672342	-0.230841	0.427187	0.1075	0.714522	0.662328	0.00985547	-0.592003	0.0257212	0.118889	0.685617	0.0864914	0.768758	0.228726	0.431554
KDELC2	blue	-0.698393	0.0054655	-0.12653	0.666445	-0.445487	0.110403	0.329956	0.249276	-0.38505	0.173981	-0.0188251	0.94907	-0.256872	0.375333	0.76596	0.00140236	-0.819015	0.00033937	0.381383	0.178467	0.184069	0.52874	-0.160174	0.584383
DYRK1B	blue	-0.696942	0.00560536	-0.263651	0.36241	-0.800284	0.00058677	0.594779	0.0248636	-0.296749	0.302888	-0.243701	0.401133	-0.095284	0.745924	0.124911	0.670491	-0.0197068	0.946688	0.113231	0.69993	-0.279445	0.333261	0.297419	0.301746
SLC16A3	blue	-0.696694	0.00562957	-0.118191	0.687378	-0.813507	0.000401116	0.666808	0.0091973	-0.160142	0.584459	-0.440877	0.114585	-0.231792	0.425234	0.0543628	0.85356	0.0609303	0.836076	0.143737	0.62397	-0.201658	0.48935	0.514751	0.0596373
PCDH10	blue	-0.696064	0.00569136	0.405303	0.150521	-0.523643	0.0546317	0.657576	0.0105927	-0.568428	0.0339273	-0.153189	0.601083	-0.725953	0.00328687	0.357595	0.209381	-0.45467	0.102387	0.608575	0.0209145	-0.249836	0.389003	-0.00970685	0.973727
LRP1	blue	-0.695855	0.00571201	-0.142499	0.626993	-0.700092	0.00530518	0.648255	0.0121613	-0.404055	0.151903	0.0801369	0.785371	-0.365229	0.199117	0.336445	0.239523	-0.312275	0.277052	0.575873	0.0311517	-0.392157	0.165495	0.339899	0.234429
NLRP3	blue	-0.695749	0.00572252	-0.407327	0.148299	-0.690075	0.00630584	0.418637	0.136279	-0.0417756	0.887241	-0.412122	0.14312	0.0466209	0.874252	0.384554	0.174583	-0.2439	0.400737	0.0468846	0.873546	0.0235785	0.936231	0.469203	0.0905373
MAPK8	blue	-0.694003	0.00589731	-0.0893512	0.761311	-0.490962	0.0746373	0.337703	0.237659	-0.233882	0.420951	-0.567747	0.0341897	-0.154138	0.598802	0.492869	0.0733457	-0.46547	0.0934847	-0.04352	0.882561	0.25542	0.378132	-0.0544217	0.853403
GPSM1	blue	-0.694003	0.00589736	0.152995	0.60155	-0.745724	0.00219865	0.820235	0.000326795	-0.594577	0.0249253	0.0512692	0.861819	-0.621672	0.0176221	0.109695	0.708922	-0.124279	0.672074	0.584582	0.0281235	-0.454168	0.102815	0.225067	0.439159
CAMK1D	blue	-0.693891	0.00590874	0.0668971	0.820251	-0.799714	0.000596107	0.630438	0.0156494	-0.0440964	0.881016	-0.671154	0.0085918	-0.290577	0.313532	0.0275729	0.925454	0.0613017	0.835089	-0.00391707	0.989397	0.101315	0.730371	0.462111	0.0961936
PCSK5	blue	-0.693024	0.00599721	0.291787	0.311429	-0.550164	0.0415075	0.606651	0.0214346	-0.534503	0.0489395	-0.172513	0.555356	-0.609241	0.0207365	0.376697	0.184308	-0.457809	0.0997422	0.408808	0.146686	0.0495679	0.866366	-0.111753	0.703685
GCLC	blue	-0.692686	0.00603192	0.0299881	0.918943	-0.541826	0.045353	0.428297	0.126543	-0.398664	0.157966	-0.696162	0.00568172	-0.144811	0.621353	0.219457	0.450947	-0.177276	0.544318	-0.221498	0.44664	0.0139557	0.962234	-0.172774	0.554748
TARSL2	blue	0.692492	0.00605196	0.0571648	0.846093	0.687406	0.00659577	-0.512984	0.0606698	0.457216	0.100238	0.642884	0.0131428	0.039835	0.89245	-0.0311841	0.91572	-0.0470018	0.873232	0.348135	0.222551	0.0251633	0.931954	0.188281	0.519182
CRABP1	blue	-0.692326	0.0060692	-0.366631	0.197268	-0.605292	0.0218079	0.336508	0.239429	0.054336	0.853632	-0.440663	0.114782	0.0284135	0.923187	0.511333	0.0616464	-0.400162	0.156266	0.0960065	0.744056	0.110988	0.70563	0.474106	0.0867653
CADPS2	blue	-0.692156	0.00608681	0.134666	0.646236	-0.543053	0.0447716	0.54642	0.0432034	-0.548672	0.0421777	0.00965527	0.973867	-0.491724	0.0741195	0.479451	0.0827799	-0.555802	0.0390466	0.509315	0.0628552	-0.105225	0.720341	-0.122708	0.676011
EMP2	blue	-0.691705	0.00613376	-0.418149	0.136783	-0.658523	0.0104425	0.363767	0.201057	-0.307155	0.285424	-0.00432285	0.988298	0.0302428	0.918256	0.524755	0.0540278	-0.48913	0.0758936	0.0523203	0.859011	0.276171	0.339191	-0.0827588	0.778506
EMB	blue	-0.691433	0.00616223	-0.310532	0.279885	-0.453135	0.103698	0.205136	0.481728	-0.148214	0.613088	-0.358715	0.207854	0.026413	0.928582	0.731462	0.00294846	-0.690848	0.0062238	0.0230232	0.93773	0.366821	0.197017	0.0462861	0.875148
RPGR	blue	-0.69075	0.00623416	-0.595435	0.024664	-0.585387	0.0278552	0.211472	0.46799	0.0405437	0.890547	-0.2937	0.30812	0.229315	0.430336	0.688682	0.00645597	-0.566387	0.0347191	0.0277616	0.924945	0.258912	0.371419	0.323955	0.258506
MT2A	blue	-0.69021	0.00629142	-0.295739	0.304617	-0.592633	0.0255248	0.426457	0.12836	-0.377535	0.183255	-0.0972966	0.740724	-0.0970693	0.741311	0.507071	0.0642188	-0.472194	0.088223	0.138304	0.637272	0.130031	0.657722	-0.0396953	0.892825
DSE	blue	-0.689995	0.00631442	-0.56011	0.03724	-0.531238	0.0506035	0.2295	0.429953	0.0146572	0.960337	-0.187902	0.52004	0.134486	0.646681	0.759876	0.00161251	-0.656888	0.0107029	0.231645	0.425535	0.0957134	0.744814	0.399698	0.156791
HMGN2	blue	-0.689739	0.00634178	0.143769	0.623893	-0.692031	0.00609981	0.558222	0.0380241	-0.313096	0.275723	-0.446602	0.109408	-0.345977	0.225627	0.197111	0.499399	-0.204665	0.482757	-0.0748037	0.79938	0.446244	0.109726	-0.127287	0.664557
TBC1D15	blue	-0.689733	0.00634247	-0.625096	0.0168303	-0.526002	0.0533564	0.159105	0.586927	0.00626785	0.983034	-0.269682	0.351121	0.260936	0.367557	0.764219	0.00146014	-0.650422	0.0117817	0.0320053	0.913508	0.234148	0.420408	0.245665	0.397229
MAT2B	blue	-0.689685	0.00634764	-0.55886	0.0377579	-0.497879	0.0700273	0.131543	0.653968	-0.0516609	0.860773	-0.349788	0.220214	0.277903	0.336046	0.748353	0.00207867	-0.648625	0.0120958	-0.0740182	0.801448	0.284252	0.324658	0.111586	0.704108
ACSF2	blue	-0.689036	0.00641755	-0.169432	0.562547	-0.782602	0.000936764	0.588236	0.0269206	-0.192054	0.510687	-0.502246	0.0672228	-0.106309	0.717567	0.0748044	0.799378	0.0527871	0.857765	-0.00272545	0.992622	-0.157822	0.589986	0.414777	0.140305
BTK	blue	-0.68844	0.00648222	-0.555558	0.0391509	-0.541323	0.045593	0.210285	0.470549	0.00464674	0.987422	-0.349943	0.219996	0.213805	0.462978	0.656647	0.0107417	-0.537805	0.0472978	0.0245241	0.933679	0.126404	0.66676	0.297362	0.301843
SYDE1	blue	-0.688134	0.00651571	-0.00472428	0.987212	-0.7415	0.00240285	0.726104	0.00327719	-0.500639	0.0682451	0.0529933	0.857215	-0.448339	0.107869	0.189561	0.516294	-0.177655	0.543443	0.569309	0.0335895	-0.504656	0.0657103	0.302999	0.292326
SMARCD3	blue	-0.68798	0.00653263	0.0304123	0.9178	-0.788359	0.00080824	0.728279	0.00314042	-0.231119	0.426617	-0.241503	0.405526	-0.419076	0.135826	0.0935062	0.750526	-0.026418	0.928569	0.44525	0.110615	-0.385085	0.173939	0.589336	0.0265662
DNAJB9	blue	-0.687911	0.00654012	-0.0772785	0.792872	-0.4864	0.0777936	0.402092	0.154093	-0.390999	0.166859	-0.260571	0.368252	-0.190783	0.513541	0.514342	0.0598751	-0.500634	0.0682488	0.296585	0.303168	-0.24538	0.397794	0.0119508	0.967657
ACTRT3	blue	-0.687769	0.00655582	-0.302622	0.292957	-0.567454	0.0343034	0.409068	0.146404	-0.279546	0.333079	-0.301259	0.295246	-0.0956481	0.744983	0.429292	0.125568	-0.360695	0.205173	0.109561	0.709265	-0.05446	0.853301	0.108527	0.7119
MBNL1	blue	-0.687609	0.00657343	0.0412677	0.888603	-0.42633	0.128487	0.395148	0.162006	-0.321021	0.263093	-0.244309	0.399923	-0.375384	0.185967	0.665377	0.00940376	-0.702686	0.00506741	0.393529	0.163889	0.12602	0.667718	0.0147445	0.960101
RAB34	blue	-0.687521	0.0065831	-0.662611	0.00981284	-0.618732	0.0183245	0.25304	0.382745	-0.160582	0.583415	-0.156883	0.592228	0.261801	0.365912	0.608041	0.0210578	-0.492524	0.0735781	-0.0440433	0.881158	0.18435	0.5281	0.101675	0.729446
RB1CC1	blue	-0.687393	0.00659722	-0.137657	0.638862	-0.386432	0.17231	0.295371	0.305247	-0.204049	0.484104	-0.168573	0.564559	-0.258313	0.372566	0.798459	0.000617075	-0.82087	0.000320397	0.450031	0.106385	0.0734871	0.802847	0.0987561	0.736959
ZNF747	blue	-0.687109	0.00662869	-0.488685	0.0762012	-0.603396	0.0223369	0.253304	0.382233	-0.12346	0.674127	-0.365524	0.198727	0.243458	0.401617	0.514144	0.0599905	-0.397831	0.158918	-0.151527	0.605082	0.183932	0.529053	0.167252	0.567657
PCDH18	blue	-0.686396	0.00670823	-0.491474	0.0742893	-0.452469	0.104271	0.197064	0.499504	-0.11353	0.699172	-0.0341966	0.907609	0.0442501	0.880603	0.880484	3.23705e-05	-0.83616	0.000194283	0.367151	0.196584	0.0757263	0.796952	0.250539	0.387624
MTHFD2	blue	-0.685833	0.00677147	0.334466	0.242473	-0.491551	0.0742366	0.561012	0.0368698	-0.292807	0.309662	-0.491716	0.0741251	-0.587162	0.0272701	0.38488	0.174187	-0.425492	0.12932	0.407464	0.148149	-0.0334206	0.909698	0.151387	0.60542
NXPE3	blue	-0.685792	0.00677613	-0.109145	0.710324	-0.441431	0.114077	0.377011	0.183913	-0.429669	0.1252	-0.0261192	0.929375	-0.320916	0.263257	0.699025	0.00540543	-0.746176	0.00217762	0.421956	0.132879	0.0502812	0.864459	-0.128041	0.662675
RICTOR	blue	-0.685543	0.00680425	0.304227	0.290277	-0.52707	0.0527865	0.622622	0.0173998	-0.634969	0.014698	-0.123406	0.674262	-0.615145	0.0192096	0.35175	0.217459	-0.432758	0.122211	0.492191	0.073803	-0.225708	0.43782	-0.181206	0.53528
LTBP3	blue	-0.68538	0.0068227	-0.102776	0.726618	-0.649077	0.0120163	0.598078	0.0238723	-0.194176	0.505936	-0.124127	0.672456	-0.373829	0.187944	0.386291	0.17248	-0.334841	0.241912	0.613731	0.0195672	-0.392041	0.165631	0.580882	0.0293819
TMEM86A	blue	-0.684734	0.00689634	-0.497826	0.0700619	-0.617627	0.0185938	0.345605	0.226159	-0.146448	0.617372	-0.236393	0.415836	0.125545	0.668905	0.484042	0.0794613	-0.36286	0.202267	0.0922526	0.753776	-0.116086	0.692697	0.303347	0.291744
FZD7	blue	-0.683352	0.00705587	-0.487164	0.0772582	-0.608411	0.0209584	0.362901	0.202213	-0.0597465	0.839222	-0.150507	0.607544	0.037127	0.899726	0.57469	0.0315809	-0.466169	0.0929281	0.289623	0.315195	-0.0937284	0.74995	0.472876	0.0877007
SERPINH1	blue	-0.683307	0.00706109	-0.337739	0.237606	-0.730725	0.00299207	0.53465	0.0488658	-0.454674	0.102384	0.049565	0.866374	-0.107559	0.714372	0.318253	0.267464	-0.268831	0.352701	0.234776	0.419126	-0.187727	0.520435	0.0194462	0.947392
LOXL1-AS1	blue	-0.683228	0.00707036	-0.632298	0.0152532	-0.58936	0.0265587	0.194786	0.504574	-0.0262825	0.928934	-0.267619	0.35496	0.299417	0.298353	0.646796	0.0124223	-0.518328	0.0575858	-0.0612633	0.835191	0.230159	0.428594	0.263642	0.362427
SLC35F2	blue	-0.682746	0.0071268	0.357482	0.209534	-0.493931	0.0726331	0.631788	0.0153611	-0.52678	0.0529406	-0.314398	0.273624	-0.646615	0.0124548	0.299805	0.297697	-0.358368	0.208326	0.522824	0.0550796	-0.393727	0.163657	0.050407	0.864123
DENND4A	blue	-0.682699	0.00713232	0.0478201	0.871042	-0.41446	0.140639	0.449333	0.106995	-0.48091	0.081715	-0.0521004	0.859599	-0.458062	0.0995309	0.645429	0.0126704	-0.705205	0.00484469	0.560769	0.0369695	-0.14416	0.622939	-0.0350797	0.905233
HTRA3	blue	-0.682137	0.00719854	0.223715	0.441985	-0.729879	0.00304273	0.757513	0.00170055	-0.231187	0.426476	-0.490942	0.0746514	-0.561489	0.0366749	-0.00243886	0.993398	0.0479368	0.870729	0.359742	0.206461	-0.335132	0.241477	0.539744	0.0463527
FSTL3	blue	-0.682043	0.00720968	-0.318154	0.267621	-0.698582	0.0054475	0.55817	0.038046	-0.324665	0.257404	-0.0164247	0.955558	-0.152983	0.601578	0.351897	0.217253	-0.272798	0.345364	0.366706	0.197168	-0.28541	0.322605	0.315287	0.272197
CYB5R2	blue	-0.681929	0.00722315	-0.454587	0.102458	-0.697075	0.00559249	0.38415	0.175076	-0.119434	0.684245	-0.386968	0.171663	0.159343	0.58636	0.326995	0.253805	-0.189467	0.516505	-0.102087	0.728389	0.0189702	0.948678	0.274246	0.342707
CTH	blue	-0.681846	0.007233	-0.444618	0.111184	-0.476404	0.0850357	0.218909	0.452106	-0.177312	0.544234	-0.202408	0.487702	0.0729337	0.804305	0.763489	0.00148491	-0.712977	0.00420526	0.0775236	0.792228	0.339445	0.235094	-0.0336156	0.909173
NEDD4L	blue	-0.681451	0.00728	0.0456339	0.876895	-0.723927	0.00341875	0.645031	0.0127435	-0.104752	0.72155	-0.588716	0.0267656	-0.317396	0.268827	0.067115	0.819674	0.0284101	0.923196	0.140224	0.63256	-0.149128	0.610877	0.526129	0.0532887
SLC2A9	blue	-0.681314	0.0072964	-0.0895526	0.760787	-0.670558	0.00867303	0.595817	0.0245484	-0.20181	0.489016	-0.315398	0.272019	-0.304424	0.289949	0.207009	0.477648	-0.139875	0.633415	0.317752	0.26826	-0.311125	0.27892	0.46834	0.0912125
ARID5B	blue	-0.680674	0.00737317	-0.0988127	0.736813	-0.626696	0.0164698	0.504594	0.0657489	0.0274886	0.925681	-0.342102	0.231214	-0.284799	0.323686	0.437001	0.118184	-0.362858	0.20227	0.40666	0.149029	-0.0132658	0.9641	0.654123	0.0111545
ELOVL2	blue	-0.680651	0.00737595	-0.511849	0.0613398	-0.596906	0.0242209	0.320375	0.264109	-0.0281011	0.924029	-0.237042	0.414519	0.105579	0.719434	0.562326	0.0363353	-0.442382	0.113208	0.170821	0.5593	-0.0329538	0.910954	0.436184	0.118952
SCUBE3	blue	-0.680405	0.00740575	-0.503024	0.0667317	-0.51828	0.0576127	0.251121	0.386487	-0.034703	0.906246	-0.127322	0.664468	0.0524581	0.858643	0.759877	0.00161247	-0.686347	0.00671362	0.328904	0.250878	0.0376352	0.89836	0.372416	0.189752
PAPPA	blue	-0.679946	0.00746136	-0.0492091	0.867326	-0.595221	0.0247288	0.592529	0.0255571	-0.313378	0.275269	-0.0371133	0.899763	-0.458944	0.0987972	0.441875	0.11367	-0.441207	0.114282	0.618037	0.0184934	-0.244141	0.400257	0.370927	0.191668
SEPT6	blue	-0.679896	0.00746744	-0.31753	0.268613	-0.610639	0.0203671	0.405033	0.15082	-0.320936	0.263227	0.0723097	0.80595	-0.135548	0.644059	0.549499	0.0418055	-0.533887	0.0492504	0.320261	0.264288	0.024646	0.93335	0.0680204	0.817279
TAF8	blue	-0.679788	0.00748063	-0.173049	0.554109	-0.628396	0.0160932	0.451346	0.105241	0.047216	0.872658	-0.198363	0.496622	-0.255614	0.377758	0.5443	0.0441859	-0.49373	0.0727674	0.491758	0.0740967	0.0340011	0.908135	0.614478	0.0193776
TNC	blue	-0.679152	0.00755841	-0.151399	0.605393	-0.630235	0.0156931	0.571294	0.032838	-0.230631	0.42762	-0.0140485	0.961983	-0.344167	0.228227	0.441097	0.114383	-0.400039	0.156406	0.649911	0.0118704	-0.395002	0.162175	0.530976	0.0507385
FAM13C	blue	-0.678764	0.00760624	-0.273201	0.344624	-0.543755	0.0444414	0.291808	0.311393	-0.0628459	0.830989	-0.264981	0.359903	-0.0392709	0.893965	0.581189	0.029276	-0.535197	0.0485909	0.173473	0.553124	0.12312	0.674979	0.246031	0.396503
CEP76	blue	-0.678448	0.00764527	-0.430843	0.124058	-0.471034	0.0891153	0.199701	0.493664	-0.276992	0.337699	-0.260443	0.368496	0.173432	0.553219	0.684557	0.00691662	-0.623567	0.0171806	-0.0254222	0.931255	0.167759	0.566467	-0.0744966	0.800188
VWA1	blue	-0.678385	0.00765314	-0.147702	0.614329	-0.672743	0.00837834	0.599574	0.0234325	-0.176267	0.546648	-0.202816	0.486806	-0.306865	0.285902	0.304576	0.289696	-0.229176	0.430622	0.490208	0.0751526	-0.382078	0.177611	0.579643	0.0298125
KRBA2	blue	-0.67822	0.00767366	0.223271	0.442915	-0.557205	0.0384516	0.573702	0.031943	-0.36418	0.200508	-0.145459	0.619776	-0.554815	0.0394695	0.3907	0.167212	-0.448421	0.107797	0.508305	0.0634663	-0.103609	0.724482	0.139575	0.634151
SV2A	blue	-0.677897	0.00771384	-0.581986	0.0290023	-0.583771	0.0283958	0.251002	0.386718	-0.0106176	0.971263	-0.181479	0.534656	0.172497	0.555392	0.678347	0.00765786	-0.566278	0.0347617	0.11689	0.690665	0.190396	0.514412	0.31129	0.278651
CLNS1A	blue	-0.677398	0.00777629	-0.34335	0.229406	-0.712688	0.00422774	0.351519	0.217782	0.0260893	0.929455	-0.662829	0.00978021	0.165911	0.570812	0.248853	0.390934	-0.105523	0.719578	-0.33954	0.234954	0.345015	0.227007	0.274525	0.342196
SCAMP1-AS1	blue	-0.676457	0.00789527	0.0298929	0.919199	-0.728039	0.00315529	0.555228	0.0392921	-0.0561689	0.848746	-0.814564	0.000388616	-0.174525	0.550682	0.0267913	0.927562	0.0918138	0.754914	-0.173488	0.553087	0.09528	0.745934	0.363188	0.201829
AURKB	blue	-0.676261	0.0079202	-0.147141	0.61569	-0.631628	0.015395	0.456497	0.100842	-0.428112	0.126726	-0.0165762	0.955148	-0.214364	0.461781	0.442967	0.112676	-0.46383	0.0948003	0.134322	0.647085	0.295311	0.305349	-0.211282	0.468398
ATP10D	blue	-0.676092	0.00794178	-0.084663	0.773529	-0.464683	0.0941144	0.458862	0.0988653	-0.393539	0.163876	0.0756121	0.797253	-0.387205	0.171379	0.660925	0.0100689	-0.683839	0.00699936	0.69234	0.00606773	-0.312108	0.277324	0.205755	0.480377
STON1	blue	-0.676023	0.00795049	-0.194429	0.505372	-0.527745	0.0524285	0.374409	0.187205	-0.0512317	0.861919	-0.376919	0.18403	-0.142093	0.627985	0.559759	0.0373848	-0.489094	0.0759189	0.222307	0.444939	0.144059	0.623185	0.362827	0.202311
HSPA1L	blue	-0.675683	0.00799407	-0.313277	0.275431	-0.546207	0.0433013	0.238442	0.411686	-0.00119855	0.996756	-0.535046	0.0486668	0.0851148	0.77235	0.56512	0.0352174	-0.480236	0.0822058	-0.181549	0.534495	0.529548	0.0514804	0.115162	0.695035
RAB27A	blue	-0.675005	0.00808148	0.203685	0.484902	-0.68899	0.00642252	0.638712	0.0139459	-0.356137	0.211378	-0.361684	0.203843	-0.425983	0.128831	0.155726	0.594997	-0.15685	0.592307	0.200258	0.492435	0.0132223	0.964217	0.0176674	0.952199
QPRT	blue	-0.675004	0.00808157	-0.580659	0.0294591	-0.595727	0.0245755	0.312565	0.276582	-0.216727	0.456738	-0.00583618	0.984202	0.142262	0.627572	0.613036	0.019745	-0.521345	0.0558952	0.171192	0.558434	0.00292087	0.992093	0.179266	0.539734
CLIP3	blue	-0.674899	0.00809515	-0.350178	0.219664	-0.598044	0.0238821	0.441496	0.114018	-0.304903	0.289152	-0.00181556	0.995085	-0.0918762	0.754752	0.485275	0.078586	-0.426792	0.128028	0.403403	0.152628	-0.333978	0.243203	0.337211	0.238387
RNASEH2A	blue	-0.67463	0.00813007	-0.377431	0.183386	-0.714331	0.00410095	0.406032	0.149719	-0.395268	0.161867	-0.178708	0.541017	0.0809903	0.783135	0.284775	0.32373	-0.224027	0.441331	-0.232347	0.424094	0.289442	0.315513	-0.257612	0.37391
IL7R	blue	-0.67454	0.00814177	-0.157139	0.591615	-0.678341	0.00765861	0.567437	0.0343101	-0.09195	0.754561	-0.224878	0.439552	-0.262885	0.363857	0.341302	0.232378	-0.2608	0.367814	0.439204	0.116129	-0.216349	0.457543	0.589693	0.0264519
RBL2	blue	-0.674228	0.00818252	-0.2026	0.48728	-0.37251	0.18963	0.251844	0.385074	-0.225669	0.437901	-0.0883367	0.763951	-0.192094	0.510596	0.846476	0.000134654	-0.869036	5.46139e-05	0.455324	0.101832	0.0722836	0.806019	0.0663586	0.821677
SLC4A8	blue	-0.673446	0.00828512	0.0097825	0.973523	-0.688539	0.00647145	0.591614	0.0258433	-0.0670243	0.819914	-0.18312	0.530905	-0.389417	0.168734	0.343526	0.229151	-0.306041	0.287264	0.511932	0.061291	-0.103683	0.724292	0.540753	0.0458662
NPAT	blue	-0.673243	0.00831196	-0.246261	0.396048	-0.400005	0.156444	0.221505	0.446624	-0.0495427	0.866433	-0.269027	0.352337	-0.110147	0.707772	0.836884	0.000189508	-0.819729	0.000331966	0.305061	0.28889	0.293528	0.308418	0.19717	0.499269
CDT1	blue	-0.672928	0.00835374	-0.0931192	0.751529	-0.645095	0.0127317	0.490934	0.0746566	-0.401694	0.15454	0.00169314	0.995417	-0.268677	0.352988	0.421038	0.133813	-0.445596	0.110305	0.203834	0.484576	0.266327	0.357377	-0.116074	0.692727
SLC39A14	blue	-0.672481	0.0084132	-0.114165	0.697561	-0.399769	0.156711	0.351406	0.217941	-0.455966	0.101289	0.0801361	0.785373	-0.304037	0.290593	0.769783	0.00128191	-0.828557	0.000250655	0.54916	0.0419577	-0.0830668	0.7777	-0.110408	0.707106
EGLN1	blue	-0.671308	0.0085709	0.283812	0.32544	-0.403478	0.152544	0.510659	0.0620481	-0.544018	0.0443178	-0.168978	0.563609	-0.588442	0.026854	0.507342	0.0640531	-0.601715	0.0228139	0.525347	0.0537088	-0.172863	0.55454	-0.127262	0.664619
ZDHHC15	blue	-0.671082	0.00860166	-0.598839	0.0236478	-0.488691	0.0761972	0.102726	0.726747	-0.0660154	0.822585	-0.325984	0.255362	0.328353	0.251722	0.741228	0.00241647	-0.641622	0.0133818	-0.158665	0.587976	0.379233	0.181132	0.046163	0.875478
ZSWIM3	blue	-0.67092	0.00862363	-0.4154	0.13965	-0.498721	0.0694804	0.279517	0.333132	-0.378155	0.182479	-0.183538	0.529952	0.121607	0.678778	0.559564	0.0374655	-0.492138	0.0738391	0.04038	0.890987	-0.122146	0.677424	-0.09927	0.735635
PIMREG	blue	-0.670481	0.00868352	-0.201457	0.489794	-0.553879	0.0398738	0.380258	0.179859	-0.442847	0.112785	-0.0151755	0.958935	-0.15287	0.601849	0.543752	0.0444425	-0.565512	0.0350628	0.108625	0.711649	0.309813	0.28106	-0.273681	0.343742
ZNF674-AS1	blue	-0.670264	0.00871318	-0.219345	0.451184	-0.571638	0.032709	0.344243	0.228116	-0.502024	0.0673633	-0.121431	0.679221	-0.0106655	0.971134	0.467364	0.091981	-0.46276	0.0956661	-0.096599	0.742525	0.281561	0.329457	-0.429405	0.125458
LOXL3	blue	-0.669691	0.00879216	-0.259198	0.370871	-0.581585	0.0291395	0.409735	0.145683	-0.129478	0.659097	-0.104558	0.722047	-0.177787	0.543138	0.584694	0.0280862	-0.54878	0.0421286	0.445089	0.11076	-0.0342795	0.907386	0.377049	0.183865
CLDN23	blue	-0.669446	0.00882598	-0.623911	0.0171012	-0.585585	0.0277894	0.177553	0.543679	-0.121769	0.67837	-0.22314	0.44319	0.328527	0.251455	0.604655	0.0219845	-0.500186	0.0685358	-0.212297	0.466214	0.380218	0.179908	-0.0391198	0.894371
TYW3	blue	-0.668945	0.00889568	-0.215919	0.458458	-0.553045	0.0402365	0.274867	0.341571	-0.0377762	0.897982	-0.486906	0.0774389	-0.00160353	0.995659	0.529914	0.0512895	-0.485889	0.0781527	-0.1233	0.674528	0.547729	0.042605	-0.033897	0.908415
RNASE4	blue	-0.668713	0.00892796	0.104806	0.721413	-0.566828	0.0345468	0.551352	0.0409801	-0.392878	0.16465	-0.176162	0.546891	-0.436233	0.118906	0.351733	0.217483	-0.378189	0.182435	0.496746	0.0707683	-0.33568	0.240661	0.136113	0.642666
H6PD	blue	-0.668527	0.00895408	-0.286358	0.320929	-0.477375	0.0843121	0.387893	0.170554	-0.493989	0.0725942	0.263104	0.363443	-0.231219	0.42641	0.721278	0.00359741	-0.751286	0.00195102	0.579369	0.0299083	-0.199964	0.493082	-0.0469299	0.873424
GFPT2	blue	-0.668296	0.00898642	-0.547304	0.0427986	-0.534235	0.0490746	0.298197	0.300422	-0.275702	0.340046	-0.011649	0.968473	0.0858	0.770561	0.661344	0.0100048	-0.586899	0.0273563	0.235963	0.416711	-0.0596556	0.839464	0.158001	0.589558
SYVN1	blue	-0.668078	0.00901708	0.12647	0.666595	-0.632039	0.0153079	0.701817	0.00514608	-0.470641	0.0894191	-0.030575	0.917361	-0.56467	0.0353956	0.229934	0.429058	-0.234861	0.418952	0.672509	0.00840943	-0.589179	0.0266167	0.383703	0.17562
RXRB	blue	-0.667888	0.00904389	-0.301634	0.294614	-0.662179	0.00987805	0.460358	0.0976284	-0.121786	0.678328	-0.267743	0.354729	-0.0644143	0.826828	0.331661	0.246689	-0.224945	0.439413	0.234507	0.419675	-0.238741	0.411083	0.525996	0.0533599
FRAT2	blue	-0.667352	0.00911987	-0.574476	0.0316591	-0.616887	0.0187757	0.280087	0.332105	-0.193837	0.506693	-0.182275	0.532836	0.245802	0.396956	0.5044	0.06587	-0.390567	0.16737	-0.0409282	0.889515	0.0340049	0.908125	0.112627	0.701463
DUSP28	blue	-0.666855	0.0091906	-0.154299	0.598416	-0.63778	0.0141304	0.467764	0.0916657	-0.0729587	0.804239	-0.432469	0.122488	-0.168275	0.565255	0.317446	0.268747	-0.233403	0.42193	0.0488574	0.868266	0.190273	0.514689	0.34682	0.224423
PLSCR1	blue	-0.666663	0.0092181	-0.159109	0.586917	-0.487606	0.0769502	0.277009	0.337669	-0.124967	0.670353	-0.366271	0.197741	-0.0681462	0.816946	0.595982	0.0244986	-0.564158	0.0355993	0.15265	0.602378	0.144441	0.622255	0.173607	0.552811
PDK4	blue	-0.666317	0.00926782	-0.508897	0.0631074	-0.545193	0.0437703	0.249255	0.390143	-0.177059	0.544819	0.0217887	0.941064	0.110478	0.706929	0.693275	0.00597141	-0.63416	0.0148646	0.226276	0.436639	0.067969	0.817415	0.153218	0.601013
SMAD3	blue	-0.665747	0.00935003	-0.477391	0.0843007	-0.581313	0.0292333	0.31342	0.2752	-0.0111555	0.969808	-0.35895	0.207535	0.107879	0.713555	0.504656	0.06571	-0.374044	0.18767	0.0940324	0.749163	-0.0309494	0.916353	0.458463	0.099197
DBT	blue	-0.665384	0.00940271	-0.0249063	0.932647	-0.401814	0.154405	0.293956	0.307679	-0.245398	0.397758	-0.51971	0.0568071	-0.191055	0.512929	0.535886	0.0482469	-0.540594	0.0459427	0.0605408	0.837111	0.139857	0.633459	-0.094733	0.747349
ZNF202	blue	-0.66523	0.00942525	-0.359031	0.207425	-0.534587	0.0488971	0.286617	0.320472	-0.387676	0.170813	-0.0761602	0.795811	0.0278016	0.924837	0.572714	0.032308	-0.562942	0.0360865	-0.0577194	0.844616	0.375568	0.185734	-0.316556	0.270165
STMN3	blue	-0.664648	0.00951035	-0.590546	0.0261803	-0.587472	0.027169	0.286941	0.3199	-0.0457057	0.876703	-0.0772358	0.792984	0.140425	0.632066	0.627012	0.0163993	-0.519094	0.0571532	0.217022	0.456111	0.00748032	0.979752	0.376949	0.183992
ECHDC3	blue	-0.663857	0.00962697	0.111362	0.704678	-0.778488	0.00103824	0.641738	0.0133597	-0.295006	0.305873	-0.265407	0.359103	-0.344283	0.228059	0.104061	0.723321	-0.0845626	0.773791	0.123414	0.674243	0.146949	0.616156	0.106788	0.716341
TEAD3	blue	-0.66379	0.00963682	-0.468588	0.0910183	-0.644121	0.0129114	0.415468	0.139578	-0.179785	0.538541	-0.0589145	0.841435	0.0261346	0.929333	0.460288	0.0976865	-0.356604	0.210736	0.302719	0.292794	-0.251046	0.386632	0.430713	0.124184
FBN1	blue	-0.66368	0.00965321	0.124048	0.672653	-0.468781	0.0908676	0.539632	0.0464066	-0.42776	0.127072	0.0819422	0.780642	-0.579622	0.0298197	0.585331	0.0278739	-0.65535	0.0109524	0.771353	0.00123488	-0.25365	0.38156	0.183819	0.52931
CDK14	blue	-0.663622	0.00966175	-0.465535	0.0934334	-0.428924	0.125928	0.149821	0.609201	0.017453	0.952778	-0.2221	0.445374	0.108412	0.712194	0.850404	0.000116296	-0.780308	0.000992299	0.226664	0.435831	0.210381	0.47034	0.302033	0.293944
ZSCAN26	blue	-0.662595	0.00981529	-0.178352	0.541836	-0.481127	0.0815574	0.301699	0.294506	-0.183091	0.530972	-0.597534	0.0240334	0.00302907	0.9918	0.451094	0.10546	-0.370588	0.192106	-0.106467	0.717161	0.134593	0.646416	0.133693	0.648642
B4GALT2	blue	-0.662205	0.00987404	-0.00478763	0.98704	-0.698017	0.00550145	0.677007	0.00782551	-0.483424	0.0799023	-0.0964049	0.743027	-0.369348	0.193714	0.130608	0.656288	-0.104621	0.721888	0.348049	0.222674	-0.369552	0.193449	0.213728	0.463142
JHY	blue	-0.661766	0.00994054	-0.432471	0.122486	-0.590905	0.0260668	0.2576	0.373933	0.0950697	0.746478	-0.299906	0.297527	0.0887492	0.762877	0.625334	0.0167763	-0.537283	0.0475546	0.035521	0.904045	0.48116	0.081533	0.350125	0.219739
STAT2	blue	-0.661608	0.00996461	-0.593339	0.0253057	-0.445543	0.110353	0.163613	0.576232	-0.293568	0.308348	0.107472	0.714593	0.162755	0.578261	0.854861	9.79809e-05	-0.816793	0.000363283	0.233799	0.421121	0.0917861	0.754986	-0.0572481	0.845871
NR3C1	blue	-0.661562	0.00997164	-0.526328	0.0531819	-0.497131	0.0705155	0.21214	0.466551	0.0445668	0.879755	-0.17711	0.5447	0.116122	0.692605	0.742769	0.00233999	-0.652047	0.0115032	0.264508	0.360795	0.0564707	0.847941	0.401478	0.154782
PARM1	blue	-0.661516	0.00997859	-0.47088	0.0892344	-0.575438	0.0313093	0.369349	0.193712	-0.105503	0.719629	-0.00647708	0.982468	-0.0238785	0.935422	0.599035	0.0235903	-0.515983	0.0589249	0.425704	0.129109	-0.189961	0.51539	0.446313	0.109665
MARC2	blue	-0.661436	0.00999085	0.329731	0.249618	-0.483756	0.0796649	0.557542	0.0383097	-0.557169	0.0384668	-0.168313	0.565167	-0.586491	0.0274903	0.379443	0.180872	-0.466937	0.0923184	0.416639	0.138353	-0.0565224	0.847804	-0.0739683	0.80158
ERAP1	blue	-0.66013	0.0101915	-0.325086	0.256751	-0.408069	0.147489	0.258911	0.37142	-0.151998	0.603948	0.0548764	0.852191	-0.148561	0.612248	0.8603	7.88824e-05	-0.860865	7.70859e-05	0.576669	0.0308655	-0.0450927	0.878345	0.263651	0.362411
UCK2	blue	-0.659978	0.0102149	-0.164272	0.574676	-0.746676	0.00215458	0.594984	0.0248011	-0.25734	0.374433	-0.129874	0.658112	-0.25244	0.383913	0.227422	0.434256	-0.173929	0.552065	0.194476	0.505266	0.103579	0.724557	0.242066	0.404399
DACT3	blue	-0.659907	0.010226	-0.248177	0.392263	-0.642129	0.0132853	0.491439	0.074313	-0.0722766	0.806038	-0.310978	0.279159	-0.157551	0.590632	0.302264	0.293557	-0.205082	0.481846	0.284893	0.323521	-0.250701	0.387308	0.516044	0.0588896
PAPSS2	blue	-0.659301	0.0103203	-0.122759	0.675885	-0.669901	0.00876318	0.586386	0.0275247	-0.226954	0.435228	-0.154319	0.598368	-0.314129	0.274057	0.235148	0.418367	-0.191323	0.512327	0.404173	0.151772	-0.314244	0.273872	0.357085	0.210078
ZNF319	blue	-0.659207	0.0103351	-0.0357652	0.903389	-0.541993	0.0452735	0.552894	0.0403023	-0.746779	0.00214986	0.257491	0.374144	-0.385393	0.173565	0.419364	0.135529	-0.482135	0.080828	0.516702	0.058512	-0.38916	0.16904	-0.172736	0.554836
TMEM100	blue	-0.658722	0.0104112	-0.527487	0.0525652	-0.579433	0.0298861	0.23047	0.427952	0.144778	0.621433	-0.424664	0.130148	0.196971	0.49971	0.567011	0.0344754	-0.430513	0.124378	-0.00709338	0.9808	0.219322	0.451232	0.457736	0.0998025
KCNE4	blue	-0.657698	0.0105733	-0.287823	0.318349	-0.639247	0.0138408	0.49956	0.0689382	-0.257145	0.374808	-0.0435945	0.882361	-0.146484	0.617285	0.398852	0.157753	-0.325731	0.255754	0.439047	0.116275	-0.37334	0.188568	0.380465	0.179602
KIF3C	blue	0.657457	0.0106117	-0.00490252	0.986729	0.642385	0.0132368	-0.390476	0.167477	0.156849	0.592309	0.83162	0.000226545	0.024729	0.933126	-0.122992	0.6753	0.0521234	0.859537	0.498287	0.069762	-0.530202	0.0511397	0.100833	0.731612
APOL3	blue	-0.657032	0.0106798	-0.441685	0.113844	-0.665333	0.00941019	0.388552	0.169765	-0.0140185	0.962064	-0.10971	0.708885	0.0136033	0.963187	0.468264	0.0912728	-0.369144	0.193979	0.284657	0.323939	-0.0690221	0.81463	0.491061	0.0745702
PLPP6	blue	-0.656944	0.0106938	-0.30274	0.292759	-0.339176	0.235489	0.192298	0.510138	-0.4267	0.128119	-0.0126339	0.965809	-0.0377309	0.898103	0.806064	0.000498625	-0.830621	0.000234186	0.265773	0.358415	-0.00845629	0.977111	-0.213582	0.463455
FAM83G	blue	-0.656527	0.010761	-0.339641	0.234806	-0.663072	0.00974376	0.456032	0.101234	-0.309555	0.281482	-0.0295329	0.92017	-0.045067	0.878414	0.408083	0.147474	-0.341347	0.232313	0.190156	0.514953	-0.0197102	0.946678	0.0618294	0.833687
RTN4R	blue	-0.656438	0.0107753	-0.133847	0.648261	-0.775966	0.00110463	0.605952	0.021626	-0.385271	0.173713	-0.0090158	0.975597	-0.212981	0.464745	0.141026	0.630594	-0.0974081	0.740436	0.24178	0.404971	-0.202206	0.488145	0.231416	0.426005
FANCB	blue	-0.656384	0.0107842	-0.386642	0.172056	-0.462927	0.0955304	0.210001	0.471161	-0.123889	0.673052	-0.215106	0.460193	0.0298347	0.919356	0.744634	0.00224999	-0.710276	0.00441945	0.0914246	0.755924	0.416917	0.138063	-0.00748494	0.97974
VCP	blue	-0.656303	0.0107972	-0.560431	0.0371078	-0.416724	0.138264	0.141285	0.629962	-0.325554	0.256026	0.00387692	0.989505	0.16375	0.575907	0.822463	0.000304789	-0.796125	0.000657631	0.104548	0.722073	0.183874	0.529183	-0.195795	0.502325
NTM	blue	-0.655648	0.0109036	-0.087944	0.764973	-0.596641	0.0243001	0.580313	0.029579	-0.366914	0.196895	0.0100268	0.972862	-0.376657	0.18436	0.394843	0.16236	-0.3801	0.180054	0.552302	0.0405616	-0.30393	0.290772	0.336167	0.239936
PDK2	blue	-0.655349	0.0109524	-0.0322275	0.91291	-0.802335	0.000554165	0.693661	0.00593202	-0.26383	0.362073	-0.230558	0.42777	-0.313118	0.275688	-0.000819378	0.997782	0.0765655	0.794746	0.264506	0.360797	-0.308154	0.283779	0.448741	0.107516
BCAS3	blue	-0.654702	0.0110587	-0.595384	0.0246793	-0.528132	0.0522239	0.20182	0.488994	-0.367598	0.195997	-0.108787	0.711238	0.298912	0.299208	0.573648	0.0319629	-0.490984	0.0746229	-0.11074	0.706261	0.0271106	0.926701	-0.177179	0.544541
ALDH1L2	blue	-0.654538	0.0110857	0.033475	0.909551	-0.498124	0.0698674	0.509133	0.0629651	-0.314937	0.272758	-0.114091	0.697749	-0.421293	0.133553	0.493742	0.0727596	-0.515674	0.0591031	0.562182	0.0363935	-0.215821	0.458668	0.215923	0.458451
PALM2-AKAP2	blue	-0.654044	0.0111676	-0.353778	0.214634	-0.515175	0.0593917	0.352996	0.215721	-0.178668	0.541109	-0.0211892	0.942683	-0.0849587	0.772757	0.639392	0.0138125	-0.587024	0.0273153	0.421524	0.133318	-0.118735	0.686005	0.34865	0.221822
FKBP5	blue	-0.652818	0.0113727	-0.535751	0.0483143	-0.429139	0.125718	0.145478	0.619731	-0.139426	0.634516	0.0517413	0.860558	0.106066	0.718187	0.888424	2.18146e-05	-0.858824	8.3736e-05	0.314103	0.274099	0.148923	0.611372	0.0831957	0.777363
ZHX2	blue	-0.652545	0.0114186	-0.6132	0.019703	-0.487944	0.0767147	0.144532	0.622032	0.00501582	0.986423	-0.105849	0.718743	0.21424	0.462046	0.807884	0.000473184	-0.720332	0.00366294	0.163484	0.576537	0.213305	0.464049	0.270887	0.348889
NR1D2	blue	-0.652424	0.0114392	-0.39091	0.166964	-0.521652	0.0557255	0.317758	0.26825	0.0483575	0.869604	-0.146061	0.618312	-0.0689528	0.814813	0.676807	0.00785083	-0.599641	0.0234129	0.443405	0.112279	-0.0346199	0.90647	0.580291	0.0295866
KLHL29	blue	-0.651755	0.0115529	0.233584	0.42156	-0.796862	0.0006446	0.823057	0.000299136	-0.400774	0.155575	-0.147097	0.615796	-0.597947	0.0239109	-0.0441432	0.88089	0.0567158	0.847289	0.426998	0.127824	-0.264786	0.36027	0.394712	0.162512
ZDBF2	blue	-0.651251	0.0116389	-0.202509	0.48748	-0.372329	0.189863	0.228158	0.432729	-0.15457	0.597766	-0.0728199	0.804605	-0.163758	0.575889	0.843066	0.000152431	-0.860154	7.9351e-05	0.4515	0.105107	0.117731	0.68854	0.119826	0.683257
HIST1H1E	blue	-0.650379	0.0117892	-0.460049	0.0978829	-0.606359	0.0215145	0.330881	0.247871	-0.270997	0.348685	-0.0187451	0.949286	0.121821	0.678239	0.492429	0.0736421	-0.417061	0.137913	0.150508	0.607541	-0.117928	0.688043	0.15538	0.595824
CFH	blue	-0.649968	0.0118605	-0.309141	0.282159	-0.632225	0.0152688	0.468262	0.0912744	-0.0669394	0.820139	-0.042999	0.883958	-0.16577	0.571144	0.490852	0.0747127	-0.411754	0.143513	0.521777	0.055656	-0.214477	0.461538	0.596262	0.0244141
PARP14	blue	-0.649798	0.01189	-0.488587	0.0762691	-0.405325	0.150498	0.14764	0.614479	-0.0575374	0.845101	-0.0165934	0.955102	0.0529317	0.857379	0.901433	1.0674e-05	-0.867053	5.94976e-05	0.358565	0.208058	0.16427	0.574681	0.230067	0.428782
CENPH	blue	-0.649309	0.0119755	-0.0323785	0.912503	-0.607235	0.0212758	0.405805	0.149968	-0.101478	0.729953	-0.467185	0.092123	-0.196333	0.501128	0.351301	0.218088	-0.327794	0.252577	-0.0705986	0.810466	0.513946	0.0601062	0.0453944	0.877537
AC098798.1	blue	-0.648877	0.0120514	0.0105077	0.971561	-0.599552	0.023439	0.459032	0.0987239	-0.0163572	0.95574	-0.48022	0.0822176	-0.239195	0.410165	0.326681	0.254288	-0.266144	0.35772	0.178942	0.540479	0.115912	0.693136	0.468717	0.0909172
SLITRK1	blue	-0.648789	0.012067	-0.457283	0.100181	-0.593973	0.0251104	0.330911	0.247826	-0.0339949	0.908152	-0.1302	0.657302	0.0442578	0.880583	0.555479	0.0391848	-0.453157	0.10368	0.303038	0.292261	-0.108959	0.710798	0.450164	0.106269
C3orf52	blue	-0.648404	0.0121349	-0.195298	0.503433	-0.597839	0.0239429	0.481676	0.0811593	-0.1242	0.672273	-0.301855	0.294243	-0.178476	0.541552	0.357678	0.209267	-0.270184	0.35019	0.326318	0.254847	-0.244884	0.398778	0.544661	0.0440175
WDR24	blue	-0.648266	0.0121593	-0.62534	0.016775	-0.594223	0.0250336	0.271575	0.347618	-0.430604	0.124289	0.0786525	0.789264	0.243458	0.401618	0.522758	0.0551161	-0.449559	0.106797	-0.0475037	0.871888	0.0364844	0.901454	-0.18592	0.524531
ACTG2	blue	-0.648205	0.0121702	-0.231674	0.425475	-0.613739	0.0195654	0.531166	0.0506403	-0.31462	0.273267	0.0650602	0.825116	-0.241866	0.404799	0.414163	0.140952	-0.369301	0.193775	0.554296	0.0396931	-0.412446	0.142775	0.386368	0.172386
TNS3	blue	-0.648069	0.0121943	-0.577083	0.0307171	-0.509583	0.0626935	0.227651	0.43378	-0.000169709	0.999541	-0.0418872	0.886941	0.0975738	0.740008	0.759077	0.00164185	-0.677428	0.00777257	0.321619	0.262154	0.0861441	0.769664	0.369052	0.1941
ZUP1	blue	0.648047	0.0121983	-0.119039	0.685241	0.808725	0.000461788	-0.784285	0.000897606	0.335307	0.241216	0.272681	0.34558	0.447178	0.108896	0.106317	0.717547	-0.165728	0.571242	-0.334404	0.242565	0.447849	0.108302	-0.402372	0.153779
B3GLCT	blue	-0.646961	0.0123924	-0.0562088	0.848639	-0.368677	0.194588	0.29933	0.2985	-0.257019	0.375049	-0.116493	0.691668	-0.275518	0.340382	0.746483	0.00216348	-0.778508	0.0010377	0.491675	0.074153	-0.0223285	0.939606	0.133806	0.648362
CLDN11	blue	-0.646663	0.0124461	-0.34304	0.229854	-0.593152	0.0253635	0.427521	0.127308	-0.107278	0.715089	-0.116803	0.690883	-0.0999	0.734012	0.47689	0.084673	-0.398013	0.15871	0.335004	0.241668	-0.0847527	0.773295	0.439425	0.115924
DDX60	blue	-0.646332	0.0125061	-0.279619	0.332947	-0.362406	0.202874	0.246517	0.395541	-0.287856	0.318291	0.0707918	0.809955	-0.14267	0.626575	0.829827	0.000240415	-0.854608	9.89547e-05	0.522131	0.0554608	-0.106468	0.71716	0.0723511	0.805841
ZBTB16	blue	-0.645476	0.0126618	-0.66511	0.00944263	-0.554719	0.0395108	0.174398	0.550975	0.0652376	0.824646	-0.197059	0.499515	0.277744	0.336334	0.668191	0.00900124	-0.541211	0.0456468	0.0482863	0.869794	0.182961	0.531268	0.366484	0.19746
ACOT1	blue	-0.645368	0.0126816	-0.0775016	0.792286	-0.556096	0.0389213	0.348954	0.221392	-0.449509	0.106842	-0.242386	0.403758	-0.0851929	0.772146	0.394401	0.162873	-0.405505	0.150299	-0.142263	0.627569	0.3874	0.171145	-0.38816	0.170234
CRABP2	blue	-0.645317	0.012691	-0.484578	0.0790795	-0.612856	0.0197912	0.341578	0.231976	-0.0225766	0.938936	-0.115984	0.692955	0.0747716	0.799464	0.515314	0.0593107	-0.401721	0.154509	0.267025	0.35607	-0.114442	0.69686	0.513184	0.0605521
PIGV	blue	-0.645312	0.0126918	-0.255576	0.377831	-0.397741	0.15902	0.233271	0.422201	-0.169006	0.563544	-0.295868	0.304396	-0.0094839	0.974331	0.650453	0.0117763	-0.607032	0.021331	0.200318	0.492302	-0.0632315	0.829966	0.177669	0.54341
PHTF2	blue	-0.645013	0.0127468	0.107237	0.715193	-0.410706	0.144636	0.448894	0.107381	-0.300956	0.295755	-0.0926134	0.75284	-0.493898	0.072655	0.630143	0.0157128	-0.677059	0.00781895	0.630018	0.0157398	-0.092245	0.753795	0.17903	0.540275
SUOX	blue	-0.64468	0.0128081	-0.543092	0.0447531	-0.503637	0.066347	0.245858	0.396846	-0.428649	0.126197	0.222646	0.444226	0.123151	0.674901	0.692039	0.00609891	-0.664623	0.00951393	0.249943	0.388793	-0.090457	0.758437	-0.105759	0.718974
SYTL4	blue	-0.644595	0.0128237	-0.212634	0.46549	-0.525692	0.0535232	0.355814	0.211822	-0.381692	0.178086	-0.0217217	0.941245	-0.116576	0.691459	0.549407	0.0418467	-0.540948	0.0457725	0.279433	0.333283	-0.035435	0.904277	-0.0248889	0.932695
AASDHPPT	blue	-0.644488	0.0128434	0.170653	0.559692	-0.389984	0.168061	0.373252	0.18868	-0.195481	0.503024	-0.510568	0.0621025	-0.35676	0.210523	0.511096	0.0617872	-0.52511	0.0538363	0.249972	0.388735	0.0827519	0.778524	0.10181	0.729099
KIRREL1	blue	-0.644454	0.0128497	-0.564623	0.0354142	-0.393045	0.164454	0.133353	0.649482	-0.114715	0.696168	-0.00769529	0.979171	0.11534	0.694583	0.904073	9.12313e-06	-0.852879	0.000105812	0.29322	0.308948	0.149583	0.609775	0.167197	0.567786
POLI	blue	-0.644402	0.0128595	0.0813115	0.782294	-0.458672	0.0990228	0.345252	0.226665	-0.0339711	0.908216	-0.689781	0.00633731	-0.236621	0.415373	0.444867	0.110959	-0.409628	0.145799	0.0127583	0.965472	0.347245	0.223816	0.180929	0.535915
TMEM198B	blue	-0.643288	0.0130669	-0.46511	0.0937724	-0.477112	0.0845079	0.185657	0.525128	0.0712607	0.808718	-0.281812	0.329008	0.136066	0.64278	0.723376	0.00345533	-0.624188	0.0170377	0.146426	0.617426	0.201215	0.490325	0.371857	0.190469
GMNN	blue	-0.642574	0.0132012	-0.430158	0.124723	-0.582829	0.0287147	0.200685	0.491494	0.121072	0.680123	-0.350201	0.219633	0.157353	0.591105	0.602708	0.0225312	-0.514864	0.0595719	-0.078162	0.790552	0.550611	0.0413086	0.235962	0.416711
BBS12	blue	-0.641436	0.0134173	-0.551208	0.0410437	-0.383932	0.175341	0.0813181	0.782276	-0.181214	0.535264	-0.145949	0.618585	0.247934	0.392743	0.809508	0.000451377	-0.752122	0.00191577	0.0763161	0.795401	0.0785336	0.789576	-0.0079524	0.978475
TGFBI	blue	-0.641004	0.0135001	-0.168071	0.565736	-0.634478	0.0147988	0.523711	0.0545951	-0.0205899	0.944302	-0.260984	0.367466	-0.250419	0.38786	0.348645	0.221829	-0.263147	0.363363	0.434824	0.120238	-0.200635	0.491603	0.655671	0.0108999
TAPBP	blue	-0.640605	0.0135769	-0.376973	0.183961	-0.436053	0.119076	0.280674	0.331049	-0.484405	0.0792027	0.0886174	0.76322	-0.00207754	0.994376	0.629785	0.0157901	-0.617317	0.0186699	0.312911	0.276023	-0.312903	0.276035	-0.0548443	0.852276
GNPTAB	blue	-0.640435	0.0136098	0.0384548	0.896158	-0.354763	0.213271	0.355974	0.211602	-0.246632	0.395313	-0.158957	0.587281	-0.400572	0.155803	0.69705	0.00559489	-0.741353	0.00241019	0.573752	0.0319246	-0.0788358	0.788783	0.165319	0.572205
MEDAG	blue	-0.639976	0.0136986	-0.507941	0.0636878	-0.543708	0.0444635	0.263424	0.36284	0.0281598	0.923871	-0.252472	0.383851	0.12802	0.662728	0.583003	0.0286554	-0.462189	0.0961304	0.200169	0.492631	-0.0658468	0.823032	0.470587	0.089461
TSPY26P	blue	-0.639819	0.0137293	-0.683959	0.0069854	-0.539429	0.0465049	0.14143	0.629606	-0.21471	0.46104	-0.129186	0.659824	0.381747	0.178019	0.622785	0.0173617	-0.519729	0.0567961	-0.212684	0.465382	0.297994	0.300768	-0.0999187	0.733964
BMPER	blue	-0.639313	0.0138281	-0.668398	0.00897207	-0.522177	0.0554357	0.150596	0.607329	0.0694664	0.813456	-0.189559	0.516297	0.281532	0.32951	0.70309	0.00503114	-0.580407	0.0295464	0.0668909	0.820267	0.174412	0.550943	0.346134	0.225402
GPR160	blue	-0.639197	0.0138507	0.120674	0.681124	-0.704422	0.00491304	0.590275	0.0262664	-0.13754	0.639151	-0.498812	0.0694212	-0.314672	0.273183	0.0395528	0.893208	0.016127	0.956363	0.0567035	0.847321	0.0260188	0.929646	0.253625	0.381609
USP40	blue	-0.638982	0.0138929	-0.164747	0.573554	-0.406684	0.149003	0.214744	0.460968	-0.39508	0.162085	-0.369572	0.193423	0.0108932	0.970518	0.51804	0.0577492	-0.52487	0.0539659	-0.202754	0.486942	0.316938	0.269557	-0.421867	0.132969
RFLNA	blue	-0.638256	0.014036	-0.631996	0.0153172	-0.561771	0.0365603	0.197445	0.498659	0.030134	0.91855	-0.130368	0.656885	0.250699	0.387311	0.661094	0.0100431	-0.542109	0.0452183	0.0928627	0.752194	0.175276	0.548941	0.366421	0.197544
GRAMD1C	blue	-0.637215	0.014243	-0.450774	0.105737	-0.423063	0.131758	0.172193	0.5561	-0.0419627	0.886738	-0.126603	0.666263	0.0483365	0.86966	0.810365	0.000440203	-0.764393	0.00145426	0.304469	0.289874	0.12524	0.669669	0.204137	0.483911
MTMR1	blue	-0.636999	0.0142864	-0.257398	0.374321	-0.31724	0.269075	0.18737	0.521242	-0.308645	0.282972	-0.207219	0.477191	-0.040975	0.889389	0.741977	0.00237905	-0.742512	0.00235262	0.222235	0.44509	-0.0282204	0.923708	-0.0838501	0.775653
HIBADH	blue	-0.636654	0.0143557	-0.61724	0.0186887	-0.481564	0.0812403	0.0807012	0.783892	0.0927986	0.75236	-0.337572	0.237854	0.323604	0.259052	0.716961	0.00390419	-0.605515	0.0217465	-0.0998785	0.734068	0.358136	0.208642	0.199765	0.493523
CSTF3	blue	-0.636559	0.0143748	-0.317425	0.26878	-0.412823	0.142373	0.211366	0.468216	-0.0106555	0.971161	-0.193747	0.506894	-0.0628214	0.831054	0.773002	0.00118699	-0.747845	0.00210144	0.263013	0.363616	0.310926	0.279243	0.15293	0.601705
FAM120AOS	blue	-0.636119	0.0144638	-0.254015	0.380852	-0.695955	0.00570213	0.38705	0.171565	-0.198558	0.496191	-0.623776	0.0171324	0.143846	0.623704	0.0619933	0.833252	0.0531313	0.856846	-0.494747	0.072089	0.280157	0.331979	-0.0049014	0.986732
PTGS2	blue	-0.635946	0.0144987	-0.592512	0.0255623	-0.50542	0.065236	0.195432	0.503135	0.0230993	0.937525	-0.205988	0.47987	0.203539	0.485221	0.688026	0.00652758	-0.566937	0.0345044	0.161337	0.581621	0.0443009	0.880468	0.387886	0.170562
SEMA4B	blue	-0.635444	0.0146009	-0.489079	0.0759292	-0.504374	0.0658858	0.313121	0.275683	-0.212293	0.466223	0.201656	0.489354	-0.0404906	0.89069	0.725554	0.00331249	-0.681109	0.00732098	0.544328	0.0441729	-0.19956	0.493974	0.301173	0.29539
ACTC1	blue	-0.635437	0.0146023	-0.555057	0.0393656	-0.558531	0.0378952	0.2329	0.42296	0.114671	0.696278	-0.281236	0.330041	0.182264	0.532859	0.588721	0.0267639	-0.459051	0.0987086	0.102178	0.728154	0.116025	0.69285	0.483764	0.0796592
BCL11A	blue	-0.635362	0.0146176	-0.323322	0.259492	-0.635274	0.0146356	0.417181	0.137788	0.0791235	0.788028	-0.35864	0.207956	-0.057257	0.845847	0.359085	0.207352	-0.238517	0.411534	0.235254	0.418151	-0.0982939	0.738151	0.649513	0.0119398
PRDM16	blue	-0.634319	0.0148317	-0.564772	0.0353551	-0.600583	0.0231393	0.244263	0.400013	0.128984	0.660326	-0.30837	0.283424	0.212748	0.465244	0.529927	0.0512829	-0.388428	0.169913	0.0387731	0.895303	0.145243	0.620301	0.507747	0.0638055
SDC2	blue	-0.63363	0.0149745	0.222836	0.443828	-0.529225	0.0516492	0.628335	0.0161065	-0.270046	0.350445	-0.169985	0.561253	-0.6172	0.0186985	0.322263	0.261145	-0.341881	0.231536	0.74203	0.00237641	-0.479247	0.0829296	0.510103	0.062381
DAAM2	blue	-0.633326	0.0150378	-0.643187	0.0130857	-0.570882	0.0329929	0.219407	0.451053	-0.000166902	0.999548	-0.0841618	0.774838	0.238625	0.411317	0.634213	0.0148535	-0.515129	0.0594178	0.118822	0.685786	0.117815	0.688328	0.391782	0.165935
UGDH	blue	-0.633017	0.0151023	-0.422549	0.132278	-0.355056	0.212867	0.111037	0.705505	-0.257826	0.3735	-0.013354	0.963861	0.0723032	0.805968	0.882967	2.8698e-05	-0.886245	2.43797e-05	0.16875	0.564143	0.318363	0.267289	-0.205015	0.481993
PKN3	blue	-0.632941	0.0151182	-0.478414	0.0835428	-0.532464	0.0499739	0.217513	0.455066	-0.246224	0.396121	0.0109289	0.970421	0.128246	0.662165	0.653739	0.0112184	-0.620727	0.0178456	0.00177713	0.995189	0.410236	0.145143	-0.187855	0.520146
TMEM69	blue	-0.632764	0.0151553	-0.0648519	0.825668	-0.60643	0.0214951	0.359183	0.207218	-0.18284	0.531543	-0.748152	0.00208765	0.0489762	0.867948	0.171042	0.558783	-0.0886457	0.763147	-0.457111	0.100326	0.43336	0.121634	-0.13179	0.653355
U91328.1	blue	-0.632665	0.015176	-0.281833	0.32897	-0.567831	0.0341574	0.354913	0.213063	-0.100341	0.732876	-0.159159	0.5868	-0.128427	0.661713	0.540521	0.0459776	-0.50027	0.0684819	0.171558	0.557581	0.3592	0.207195	0.183266	0.530571
SLC44A5	blue	-0.632199	0.0152741	0.24436	0.39982	-0.441427	0.114081	0.540705	0.0458894	-0.261439	0.3666	-0.244588	0.399368	-0.604326	0.0220761	0.428286	0.126554	-0.46386	0.0947766	0.648343	0.0121457	-0.28709	0.319638	0.372101	0.190156
BRWD1	blue	-0.632171	0.01528	-0.14682	0.61647	-0.469333	0.0904356	0.26453	0.360752	0.150266	0.608126	-0.538704	0.046858	-0.0982932	0.738153	0.547847	0.0425515	-0.488036	0.0766513	0.151306	0.605616	0.225314	0.438642	0.433796	0.121217
EHHADH	blue	-0.632132	0.0152884	-0.570401	0.0331745	-0.481319	0.0814182	0.135038	0.645317	-0.167783	0.566411	-0.273671	0.34376	0.282184	0.328344	0.631706	0.0153785	-0.543858	0.044393	-0.186162	0.523982	0.334435	0.242518	-0.140036	0.633019
HERPUD2	blue	-0.632105	0.0152941	0.0149173	0.959633	-0.390463	0.167493	0.379951	0.18024	-0.56919	0.033635	-0.00854672	0.976867	-0.334748	0.24205	0.5444	0.0441392	-0.620846	0.0178175	0.327839	0.252508	-0.0529367	0.857366	-0.325615	0.255933
TFDP2	blue	-0.631564	0.0154087	0.0960965	0.743823	-0.66286	0.00977547	0.552125	0.0406392	0.14046	0.63198	-0.678812	0.00760035	-0.336687	0.239164	0.123856	0.673135	-0.0365005	0.901411	0.139539	0.634239	0.0958635	0.744426	0.651316	0.0116278
SRPRA	blue	-0.631547	0.0154123	-0.0416324	0.887625	-0.377205	0.183669	0.394074	0.163254	-0.53654	0.0479218	0.13312	0.650061	-0.389178	0.169019	0.671161	0.00859083	-0.749863	0.00201214	0.57863	0.030168	-0.158355	0.588715	-0.152894	0.601792
MEIS3	blue	-0.631318	0.015461	-0.225381	0.438503	-0.653249	0.0113002	0.536666	0.0478592	-0.351339	0.218034	-0.196701	0.500309	-0.108309	0.712456	0.15534	0.59592	-0.0656578	0.823533	0.183622	0.529758	-0.433527	0.121473	0.266427	0.35719
GNA14	blue	-0.630883	0.0155538	-0.174663	0.550362	-0.426172	0.128643	0.295304	0.305362	-0.522099	0.0554783	0.11845	0.686726	-0.156984	0.591986	0.644905	0.0127665	-0.703637	0.00498241	0.261049	0.367342	0.0980088	0.738886	-0.378533	0.182006
IMPAD1	blue	-0.630582	0.0156183	-0.354559	0.213553	-0.301824	0.294296	0.136885	0.640764	-0.191151	0.512713	-0.0816161	0.781496	-0.02437	0.934095	0.90471	8.7782e-06	-0.900594	1.12104e-05	0.348831	0.221566	0.0981512	0.738519	0.0545738	0.852998
TMEM245	blue	-0.63036	0.0156662	-0.395441	0.161667	-0.387206	0.171378	0.192846	0.508911	0.0060311	0.983675	-0.0652158	0.824704	-0.0474708	0.871976	0.857475	8.83834e-05	-0.820448	0.000324638	0.482188	0.0807898	0.0326344	0.911814	0.391403	0.166383
LIN9	blue	-0.630161	0.015709	-0.447149	0.108921	-0.416511	0.138486	0.101123	0.730866	0.115372	0.694504	-0.423086	0.131735	0.180026	0.537987	0.753557	0.00185651	-0.667055	0.00916205	-0.00858858	0.976753	0.397863	0.158882	0.253139	0.382552
SMAD6	blue	-0.629958	0.0157527	-0.571258	0.0328514	-0.596831	0.0242432	0.245536	0.397485	0.12807	0.662604	-0.330822	0.24796	0.219049	0.451808	0.51616	0.0588231	-0.369219	0.193881	0.00708205	0.98083	0.165502	0.571775	0.501524	0.0676812
RFTN1	blue	-0.629935	0.0157577	-0.0683421	0.816428	-0.441208	0.114281	0.439853	0.115529	-0.244797	0.398951	0.0123489	0.96658	-0.394761	0.162455	0.619181	0.0182158	-0.640078	0.013679	0.697738	0.00552827	-0.261927	0.365674	0.313026	0.275837
STC2	blue	-0.629688	0.0158113	0.0515213	0.861145	-0.592513	0.0255621	0.640585	0.0135808	-0.348638	0.221838	0.00704219	0.980938	-0.503154	0.0666503	0.312777	0.276239	-0.307705	0.284516	0.675589	0.00800609	-0.434916	0.120151	0.422664	0.132161
MCL1	blue	-0.629296	0.0158963	0.162329	0.57927	-0.329087	0.2506	0.343559	0.229104	-0.428891	0.125961	-0.224208	0.440953	-0.404661	0.151231	0.604489	0.0220308	-0.689335	0.00638527	0.339913	0.234409	0.0753075	0.798054	-0.213363	0.463925
LINC00963	blue	-0.628851	0.0159935	-0.0200342	0.945803	-0.73234	0.00289717	0.634117	0.0148734	-0.264299	0.361188	-0.513605	0.0603055	-0.228348	0.432336	-0.0848817	0.772958	0.181753	0.534029	0.0227401	0.938495	-0.315102	0.272492	0.322361	0.260992
TANC2	blue	-0.628828	0.0159983	-0.0820599	0.780334	-0.636452	0.0143964	0.516758	0.0584799	-0.243374	0.401785	-0.42498	0.129832	-0.135223	0.644861	0.109021	0.71064	-0.0184949	0.949962	0.0830243	0.777811	-0.317656	0.268412	0.385937	0.172907
SMAD9	blue	-0.628767	0.0160117	-0.552465	0.0404899	-0.547456	0.0427294	0.195287	0.503457	0.187328	0.521339	-0.32947	0.250015	0.1986	0.496098	0.636259	0.0144354	-0.506928	0.0643063	0.0660806	0.822413	0.275698	0.340054	0.49559	0.0715298
ZNF217	blue	-0.628718	0.0160224	-0.487079	0.0773179	-0.438604	0.116687	0.19686	0.499958	-0.0334782	0.909542	-0.288392	0.317351	0.101764	0.729217	0.683128	0.00708201	-0.588765	0.0267497	0.114959	0.695549	0.13184	0.65323	0.239896	0.408755
ITGA10	blue	-0.628498	0.0160707	-0.57637	0.0309728	-0.543305	0.0446528	0.254869	0.379197	-0.0165749	0.955152	-0.0658064	0.823139	0.139238	0.634977	0.628439	0.0160836	-0.521102	0.0560299	0.282032	0.328615	-0.100627	0.732141	0.41561	0.139429
FOXK1	blue	-0.627878	0.0162073	-0.464879	0.0939578	-0.6334	0.0150223	0.344994	0.227036	-0.148744	0.611806	-0.263954	0.361839	0.136201	0.642448	0.320334	0.264174	-0.207648	0.476258	-0.0678337	0.817773	-0.00964397	0.973898	0.201065	0.490655
EPS8	blue	-0.627516	0.0162873	-0.356348	0.211088	-0.378235	0.182378	0.239458	0.409636	-0.194598	0.504993	0.101991	0.728634	-0.109003	0.710687	0.834212	0.000207637	-0.823755	0.000292587	0.565414	0.0351014	-0.132173	0.652405	0.243676	0.401183
NEIL3	blue	-0.627248	0.0163467	-0.0243411	0.934173	-0.506461	0.0645932	0.326615	0.25439	-0.0838049	0.775771	-0.260826	0.367766	-0.23763	0.413329	0.560682	0.0370049	-0.577154	0.0306917	0.161694	0.580774	0.512639	0.060873	0.0425373	0.885197
UAP1	blue	-0.62722	0.016353	-0.0647785	0.825863	-0.377816	0.182902	0.339184	0.235477	-0.104727	0.721614	-0.0949787	0.746714	-0.353375	0.215194	0.747404	0.00212135	-0.769903	0.00127825	0.641011	0.0134989	-0.0282991	0.923496	0.338084	0.237098
RIPOR2	blue	-0.626599	0.0164914	-0.507369	0.0640363	-0.55682	0.038614	0.2457	0.397159	0.052689	0.858027	-0.0452833	0.877835	0.0665767	0.821099	0.654638	0.0110693	-0.5835	0.0284874	0.246129	0.396308	0.217699	0.454671	0.372642	0.189462
RRM2	blue	-0.626498	0.016514	0.0579006	0.844133	-0.450753	0.105756	0.37767	0.183086	-0.3517	0.217529	-0.115545	0.694066	-0.356669	0.210647	0.545819	0.0434805	-0.617362	0.0186589	0.250524	0.387655	0.335916	0.240309	-0.218892	0.452141
CUL9	blue	-0.626074	0.0166093	-0.612961	0.0197641	-0.509938	0.0624803	0.189354	0.51676	-0.252363	0.384063	0.0792677	0.78765	0.214696	0.461071	0.690289	0.0062831	-0.628228	0.01613	0.0752052	0.798323	0.192447	0.509805	-0.0705437	0.810611
AP1G2	blue	-0.62591	0.0166461	-0.653592	0.0112429	-0.607198	0.0212857	0.253432	0.381984	-0.152792	0.602037	-0.0546542	0.852783	0.267474	0.355231	0.52441	0.0542149	-0.400613	0.155757	-0.00799811	0.978351	0.0906542	0.757925	0.166911	0.568459
ITGA5	blue	-0.625772	0.0166772	-0.0580582	0.843714	-0.362288	0.203033	0.402277	0.153885	-0.523432	0.0547471	0.149702	0.609487	-0.393079	0.164414	0.668728	0.00892585	-0.730287	0.00301823	0.674537	0.0081422	-0.350212	0.219616	-0.00382071	0.989657
PIAS3	blue	-0.62531	0.0167817	-0.418585	0.136332	-0.402736	0.153373	0.254611	0.379697	-0.29876	0.299466	0.255474	0.378028	-0.0776897	0.791792	0.832351	0.000221077	-0.834297	0.000207041	0.558718	0.037817	-0.122741	0.675929	0.0959918	0.744094
MEIS1	blue	-0.625005	0.016851	-0.704071	0.004944	-0.444812	0.111009	0.0398541	0.892399	-0.0750129	0.798829	-0.0815242	0.781737	0.370378	0.192378	0.825587	0.000275974	-0.74349	0.00230485	-0.0508125	0.863039	0.365461	0.19881	-0.00101103	0.997263
RASGRP2	blue	-0.624787	0.0169007	-0.206536	0.478677	-0.628738	0.016018	0.483236	0.080037	-0.465394	0.0935455	0.143576	0.624364	-0.197249	0.499092	0.358266	0.208465	-0.356695	0.210612	0.243885	0.400765	0.0313434	0.915291	-0.0963867	0.743073
PANX1	blue	-0.624675	0.0169262	-0.0592117	0.840645	-0.330338	0.248695	0.344799	0.227316	-0.392738	0.164813	-0.0981346	0.738562	-0.31477	0.273026	0.642783	0.0131618	-0.676775	0.00785487	0.484697	0.0789953	-0.225724	0.437788	0.037165	0.899624
TAF4B	blue	-0.624515	0.0169628	-0.668951	0.00889482	-0.491546	0.0742406	0.0945808	0.747743	-0.00577774	0.98436	-0.197352	0.498864	0.349752	0.220265	0.69157	0.00614788	-0.582768	0.0287354	-0.0684671	0.816097	0.241318	0.405898	0.128818	0.660739
PIGK	blue	-0.6237	0.01715	-0.0584819	0.842586	-0.308976	0.28243	0.266809	0.356475	-0.325404	0.256258	-0.0380794	0.897167	-0.289956	0.314614	0.788616	0.000802836	-0.84728	0.000130715	0.475438	0.0857596	0.0668701	0.820322	-0.054115	0.854221
KIAA0355	blue	-0.623431	0.0172121	-0.453603	0.103297	-0.356497	0.210883	0.128808	0.660765	-0.138541	0.63669	-0.0140762	0.961908	0.0495221	0.866489	0.874253	4.32997e-05	-0.851855	0.000110053	0.303642	0.291252	0.139967	0.633189	0.116358	0.69201
KIF22	blue	-0.622557	0.017415	-0.0524762	0.858595	-0.529776	0.0513617	0.407104	0.148543	-0.317453	0.268736	-0.0866491	0.768347	-0.27345	0.344165	0.459343	0.0984663	-0.496224	0.0711115	0.178169	0.542258	0.326611	0.254395	-0.145263	0.620254
CALN1	blue	-0.622369	0.0174589	-0.588264	0.0269116	-0.53524	0.0485697	0.200752	0.491345	0.0450797	0.87838	-0.049412	0.866783	0.178423	0.541674	0.693076	0.00599182	-0.598208	0.0238337	0.232927	0.422905	0.112457	0.701894	0.381971	0.177744
OTULINL	blue	-0.622312	0.017472	-0.435765	0.119348	-0.499219	0.0691577	0.2498	0.389073	0.0657575	0.823269	-0.134195	0.6474	-0.00906754	0.975457	0.691511	0.00615406	-0.621003	0.0177801	0.357982	0.208853	0.0962851	0.743336	0.434297	0.12074
MDFIC	blue	-0.62179	0.0175945	-0.58177	0.0290762	-0.407435	0.148181	0.0831602	0.777456	-0.0156853	0.957557	-0.0427084	0.884738	0.202206	0.488145	0.898652	1.25354e-05	-0.837029	0.000188557	0.200141	0.492692	0.296908	0.302616	0.171798	0.55702
OSGEPL1	blue	-0.621627	0.0176327	-0.50008	0.0686039	-0.446437	0.109555	0.113839	0.698387	0.0101322	0.972576	-0.320368	0.264119	0.227796	0.43348	0.709999	0.00444192	-0.622417	0.0174476	0.00434037	0.988251	0.260382	0.368612	0.155177	0.596312
ZNF467	blue	-0.621614	0.017636	-0.552073	0.0406622	-0.67505	0.00807562	0.36042	0.205544	-0.251295	0.386146	0.073691	0.80231	0.14582	0.618897	0.404354	0.151572	-0.30931	0.281882	0.105583	0.719423	-0.0384556	0.896156	0.158486	0.588402
GRM8	blue	-0.62106	0.0177666	-0.373739	0.188059	-0.50386	0.0662074	0.302029	0.293952	0.107511	0.714493	-0.117277	0.689686	-0.0977944	0.739439	0.691386	0.00616711	-0.616572	0.0188537	0.467496	0.0918774	0.0703059	0.811238	0.594777	0.0248641
ALDH6A1	blue	-0.620665	0.0178605	-0.630705	0.015592	-0.426338	0.128478	0.0571686	0.846083	-0.175451	0.548536	-0.0586955	0.842018	0.314643	0.27323	0.799298	0.000602987	-0.739338	0.002513	-0.0491	0.867617	0.340696	0.233263	-0.0952166	0.746098
FAR2	blue	-0.620655	0.0178627	-0.580724	0.0294366	-0.340859	0.233025	0.0591169	0.840897	-0.179805	0.538496	-0.160188	0.584351	0.249757	0.389157	0.831851	0.000224802	-0.767586	0.00135007	0.076462	0.795018	0.0844239	0.774154	0.0018528	0.994984
IL1RAP	blue	-0.620588	0.0178787	-0.0735645	0.802643	-0.384708	0.174396	0.373208	0.188736	-0.292906	0.309491	-0.060945	0.836037	-0.314929	0.272771	0.6393	0.0138306	-0.651356	0.0116209	0.605515	0.0217464	-0.303809	0.290974	0.204429	0.483272
IVD	blue	-0.620588	0.0178788	0.21201	0.466831	-0.458055	0.0995368	0.51862	0.0574207	-0.425639	0.129174	-0.0454938	0.877271	-0.57672	0.0308472	0.441461	0.11405	-0.519578	0.056881	0.524257	0.0542982	-0.0136945	0.96294	0.0537029	0.855321
ZSCAN20	blue	-0.620542	0.0178895	-0.271106	0.348482	-0.424096	0.130718	0.313208	0.275542	-0.230301	0.428301	0.0518748	0.860201	-0.161109	0.582162	0.661515	0.00997883	-0.652196	0.0114777	0.459896	0.0980095	-0.117934	0.688028	0.153852	0.59949
ACVR1	blue	-0.619049	0.0182478	0.059661	0.83945	-0.344743	0.227397	0.390698	0.167214	-0.274585	0.342087	-0.209405	0.472449	-0.42585	0.128963	0.586878	0.027363	-0.624813	0.0168947	0.541491	0.0455127	-0.195873	0.502152	0.175507	0.548406
C11orf54	blue	-0.618712	0.0183293	-0.610511	0.0204006	-0.39817	0.15853	0.0521429	0.859485	-0.0391502	0.894289	-0.27178	0.347239	0.326076	0.255221	0.772986	0.00118746	-0.671302	0.00857179	-0.0398763	0.892339	0.197811	0.497846	0.127882	0.663073
TIGD2	blue	-0.618696	0.0183332	-0.53808	0.0471626	-0.387161	0.171432	0.0597867	0.839116	-0.0447262	0.879327	-0.237956	0.412668	0.27572	0.340014	0.793501	0.00070575	-0.722122	0.0035397	-0.00328323	0.991112	0.262344	0.364882	0.018948	0.948738
BCL7A	blue	-0.617029	0.0187408	-0.351728	0.217491	-0.405221	0.150612	0.264698	0.360436	-0.403831	0.152152	-0.159442	0.586126	0.0188717	0.948944	0.540076	0.0461923	-0.5057	0.0650624	0.0965612	0.742623	-0.147746	0.614223	-0.129147	0.659921
CDC45	blue	-0.61691	0.01877	0.158043	0.589458	-0.503247	0.0665915	0.457805	0.099745	-0.432453	0.122504	-0.130068	0.65763	-0.417269	0.137697	0.389774	0.168309	-0.464988	0.0938701	0.187532	0.520877	0.322358	0.260996	-0.249485	0.389691
SLC7A1	blue	-0.61679	0.0187999	0.227547	0.433995	-0.35528	0.212558	0.470601	0.0894507	-0.629291	0.0158974	-0.0611482	0.835497	-0.536706	0.0478398	0.482189	0.0807889	-0.583836	0.0283741	0.477772	0.0840176	-0.192645	0.509362	-0.242023	0.404486
BRD3	blue	-0.616244	0.018935	-0.603811	0.0222202	-0.60354	0.0222965	0.262692	0.364224	0.0146539	0.960346	-0.159421	0.586174	0.198741	0.495787	0.495161	0.0718139	-0.369328	0.19374	0.0759571	0.796345	0.0512757	0.861801	0.412995	0.14219
EPB41L1	blue	-0.616017	0.0189916	-0.689758	0.00633982	-0.53837	0.0470209	0.149076	0.611003	-0.111574	0.704141	-0.0222667	0.939773	0.324779	0.257226	0.654465	0.0110979	-0.558877	0.0377506	-0.0018025	0.995121	0.189258	0.516977	0.104985	0.720955
MINPP1	blue	-0.61599	0.0189981	-0.380925	0.179033	-0.313956	0.274336	0.123393	0.674294	-0.202308	0.487921	-0.0620517	0.833097	0.0317601	0.914169	0.864208	6.71268e-05	-0.853633	0.000102774	0.329194	0.250437	0.0130562	0.964666	0.0385452	0.895915
TMEM123	blue	-0.615702	0.0190701	-0.24653	0.395515	-0.326712	0.25424	0.136684	0.641257	-0.160451	0.583725	-0.111479	0.704382	-0.0684123	0.816242	0.854232	0.000100413	-0.877286	3.76559e-05	0.251546	0.385656	0.356863	0.210381	-0.0527878	0.857763
EGF	blue	-0.615641	0.0190852	-0.284125	0.324884	-0.448916	0.107361	0.296544	0.303239	-0.575854	0.0311586	-0.101684	0.729423	0.0138356	0.962559	0.434292	0.120745	-0.421048	0.133803	0.0229708	0.937872	-0.212862	0.465	-0.378947	0.181489
NMT1	blue	-0.615083	0.0192252	-0.363041	0.202025	-0.324035	0.258381	0.180574	0.536729	-0.347844	0.222965	0.117289	0.689657	-0.0677649	0.817955	0.857164	8.94825e-05	-0.883802	2.75433e-05	0.362508	0.202737	0.105407	0.719874	-0.162144	0.579709
MCM5	blue	-0.615043	0.0192352	-0.233121	0.422507	-0.476559	0.0849197	0.268709	0.352929	-0.35154	0.217753	-0.00400526	0.989158	-0.0744536	0.800301	0.601141	0.0229785	-0.629566	0.0158377	0.0668315	0.820425	0.42735	0.127477	-0.286902	0.31997
ITM2B	blue	-0.614705	0.0193203	-0.0183775	0.95028	-0.528011	0.0522877	0.371026	0.19154	0.114628	0.696388	-0.432013	0.122927	-0.235762	0.417119	0.423569	0.131247	-0.381045	0.178884	0.294238	0.307193	0.0876074	0.76585	0.531462	0.0504877
FOXRED1	blue	-0.613962	0.0195085	-0.57323	0.0321168	-0.473881	0.0869362	0.155991	0.594361	-0.420124	0.134748	-0.00443753	0.987988	0.260311	0.368746	0.627007	0.0164003	-0.585699	0.0277517	-0.147372	0.615129	0.272525	0.345867	-0.399516	0.156999
MB21D2	blue	-0.613565	0.0196096	-0.657709	0.0105715	-0.503346	0.0665293	0.157333	0.591154	-0.0569871	0.846566	-0.26204	0.365459	0.313632	0.274858	0.615191	0.0191982	-0.483633	0.0797529	-0.127676	0.663584	0.26297	0.363697	0.14746	0.614916
TOB1	blue	-0.613119	0.0197237	-0.195063	0.503956	-0.620597	0.0178766	0.458952	0.0987908	-0.104607	0.721922	-0.32721	0.253474	-0.118204	0.687345	0.286108	0.32137	-0.189682	0.516021	0.159956	0.584902	-0.0226852	0.938643	0.436637	0.118525
ZSWIM4	blue	-0.613116	0.0197244	-0.590204	0.026289	-0.439369	0.115976	0.172194	0.556099	-0.420519	0.134344	-0.0140458	0.96199	0.268289	0.35371	0.604233	0.0221024	-0.535923	0.0482284	0.0117492	0.968202	-0.168005	0.565889	-0.1486	0.612153
CBS	blue	-0.612747	0.0198193	0.0713398	0.808509	-0.631666	0.0153871	0.667429	0.00910882	-0.293802	0.307944	-0.241596	0.405341	-0.464304	0.0944193	0.112631	0.701454	-0.0707834	0.809978	0.390477	0.167476	-0.297904	0.300921	0.417138	0.137833
BCAR3	blue	-0.612681	0.0198362	-0.648922	0.0120436	-0.498004	0.0699457	0.178129	0.54235	-0.102529	0.727252	0.0422065	0.886084	0.232939	0.422879	0.700875	0.0052325	-0.611066	0.0202552	0.211909	0.467048	-0.0311885	0.915708	0.20097	0.490864
CCDC50	blue	-0.612615	0.0198533	0.255483	0.378011	-0.555123	0.0393373	0.487587	0.0769632	-0.0220877	0.940256	-0.73601	0.00269031	-0.366546	0.197379	0.148177	0.613179	-0.115866	0.693254	0.033444	0.909635	0.174267	0.551279	0.244668	0.399208
FOSL2	blue	-0.611518	0.0201374	0.280788	0.330845	-0.392252	0.165383	0.546901	0.0429829	-0.533049	0.0496752	-0.174323	0.551151	-0.588122	0.0269576	0.356914	0.210312	-0.42095	0.133903	0.569116	0.0336632	-0.439821	0.115558	0.0528205	0.857676
CCNA2	blue	-0.611279	0.0201994	-0.162998	0.577687	-0.410929	0.144397	0.250176	0.388336	-0.332413	0.245556	-0.020127	0.945552	-0.146157	0.618078	0.670072	0.00873955	-0.719942	0.00369022	0.166907	0.568468	0.389703	0.168394	-0.293718	0.308089
AL928921.2	blue	-0.610866	0.0203076	-0.320935	0.263228	-0.531841	0.0502932	0.315611	0.271677	-0.530759	0.0508508	-0.068296	0.81655	0.0403655	0.891025	0.408712	0.14679	-0.397269	0.159561	-0.0488523	0.86828	0.0553875	0.850828	-0.410056	0.145336
SYNCRIP	blue	0.610826	0.0203181	0.248885	0.390869	0.675025	0.00807889	-0.470468	0.0895535	0.343638	0.228989	0.127506	0.66401	0.00478981	0.987034	-0.178709	0.541015	0.0962084	0.743534	-0.0706485	0.810334	0.220699	0.448323	-0.168708	0.564241
RNASEL	blue	-0.61021	0.02048	-0.585253	0.0278997	-0.426794	0.128026	0.161824	0.580467	-0.281684	0.329237	0.206825	0.478046	0.159066	0.587021	0.779209	0.00101983	-0.745892	0.00219081	0.31205	0.277417	-0.08587	0.770379	0.0160652	0.95653
C7orf55-LUC7L2	blue	-0.610101	0.0205086	-0.351037	0.218458	-0.468243	0.0912887	0.206855	0.477983	-0.275281	0.340815	0.0173422	0.953078	0.0752355	0.798244	0.644019	0.0129305	-0.630377	0.0156623	0.163687	0.576057	0.0864521	0.768861	-0.110446	0.707009
RADIL	blue	-0.609986	0.0205392	-0.671741	0.0085124	-0.541271	0.0456181	0.174619	0.550463	0.100074	0.733565	-0.128869	0.660614	0.268592	0.353147	0.654422	0.0111049	-0.526505	0.0530875	0.105834	0.718782	0.16275	0.578273	0.415011	0.140059
FBXO33	blue	-0.609969	0.0205436	-0.0990687	0.736154	-0.593579	0.0252316	0.436683	0.118482	-0.157887	0.58983	-0.485126	0.0786916	-0.0977167	0.73964	0.199826	0.493387	-0.109436	0.709582	-0.0314237	0.915075	0.00560839	0.984819	0.155675	0.595118
PKMYT1	blue	-0.609487	0.0206712	0.126676	0.666081	-0.533878	0.0492551	0.523559	0.0546778	-0.500056	0.0686189	-0.0308739	0.916556	-0.442417	0.113177	0.325271	0.256464	-0.394846	0.162356	0.26583	0.358309	0.155941	0.594482	-0.229485	0.429983
PM20D2	blue	-0.609472	0.0206752	0.189556	0.516304	-0.359877	0.206278	0.382677	0.176876	-0.340725	0.23322	-0.126132	0.66744	-0.485604	0.0783534	0.611356	0.0201795	-0.696681	0.0056309	0.497477	0.0702892	0.0869652	0.767523	-0.0322214	0.912927
DHFR	blue	-0.609472	0.0206753	0.155084	0.596533	-0.55121	0.0410428	0.480874	0.0817414	-0.275565	0.340295	-0.224672	0.439983	-0.423936	0.130878	0.321115	0.262945	-0.373692	0.188119	0.169942	0.561353	0.380266	0.179849	-0.120663	0.681151
NSMAF	blue	-0.609328	0.0207134	0.300423	0.296654	-0.353339	0.215244	0.455371	0.101792	-0.386503	0.172224	-0.269182	0.352049	-0.576703	0.0308532	0.465961	0.0930933	-0.551712	0.0408212	0.478078	0.0837911	-0.0906575	0.757916	-0.0837471	0.775922
WWTR1	blue	-0.609314	0.0207172	-0.54452	0.0440831	-0.307648	0.284611	0.0702122	0.811486	-0.183809	0.529333	0.0176761	0.952175	0.138869	0.635885	0.935986	8.64612e-07	-0.906154	8.03533e-06	0.282292	0.328149	0.101341	0.730306	0.0161863	0.956202
HERC3	blue	-0.60897	0.0208088	-0.602389	0.0226217	-0.440172	0.115234	0.154482	0.597978	-0.17557	0.54826	0.0556971	0.850003	0.196193	0.501439	0.761261	0.00156261	-0.696431	0.00565536	0.243202	0.402129	-0.00889297	0.97593	0.103358	0.725125
COQ8B	blue	-0.608917	0.0208229	-0.71409	0.00411935	-0.570181	0.0332577	0.190912	0.513252	-0.184451	0.52787	0.0303139	0.918065	0.329774	0.249553	0.587468	0.0271702	-0.478518	0.083466	-0.0167684	0.954629	0.119914	0.683036	0.067653	0.818251
E2F1	blue	-0.608916	0.0208232	0.279914	0.332416	-0.50698	0.0642746	0.530272	0.0511031	-0.481389	0.0813671	-0.0947936	0.747193	-0.54174	0.045394	0.34076	0.233169	-0.43479	0.12027	0.316584	0.27012	0.206831	0.478033	-0.208165	0.475136
GTF2H3	blue	-0.608836	0.0208445	0.0763636	0.795276	-0.474066	0.0867952	0.293396	0.308644	-0.0721704	0.806318	-0.62713	0.0163731	-0.15691	0.592163	0.398216	0.158477	-0.385683	0.173214	-0.153859	0.599472	0.538957	0.0467347	-0.0804061	0.784665
EPHB6	blue	-0.608537	0.0209247	-0.54746	0.0427273	-0.548732	0.0421504	0.224589	0.440156	0.130374	0.656871	-0.16614	0.570272	0.164081	0.575127	0.631492	0.0154239	-0.512645	0.0608693	0.150218	0.608242	0.233517	0.421698	0.462852	0.0955918
OPCML	blue	-0.608522	0.0209287	-0.516195	0.0588027	-0.568103	0.0340524	0.214849	0.460744	-0.0624778	0.831966	-0.134238	0.647294	0.227504	0.434086	0.548294	0.0423483	-0.449318	0.107008	0.0334527	0.909611	0.1214	0.679297	0.196155	0.501524
FOXC2	blue	-0.608344	0.0209763	-0.69105	0.00620247	-0.487926	0.0767274	0.102877	0.72636	0.0764321	0.795096	-0.125493	0.669037	0.317887	0.268045	0.734508	0.0027735	-0.617584	0.0186043	0.0611878	0.835392	0.226918	0.435302	0.348922	0.221437
PFKFB3	blue	-0.608185	0.0210192	-0.113186	0.700044	-0.34941	0.220747	0.350868	0.218695	-0.341014	0.232799	-0.00473888	0.987172	-0.311961	0.277561	0.681412	0.00728471	-0.705616	0.00480909	0.604343	0.0220717	-0.258331	0.372531	0.174102	0.551663
ZNF555	blue	-0.608142	0.0210306	-0.374159	0.187523	-0.485707	0.0782809	0.132494	0.651611	-0.0144145	0.960993	-0.469807	0.0900663	0.221709	0.446195	0.538864	0.0467797	-0.464448	0.094303	-0.224685	0.439955	0.399763	0.156718	-0.0381153	0.89707
HMGB2	blue	-0.608045	0.0210568	-0.279849	0.332533	-0.505986	0.0648857	0.204137	0.483911	-0.0752394	0.798233	-0.348925	0.221432	0.0569688	0.846615	0.53856	0.0469281	-0.506633	0.0644875	-0.198921	0.495388	0.681054	0.00732751	-0.141235	0.630083
FANCD2	blue	-0.607502	0.0212034	-0.29655	0.303229	-0.389464	0.168678	0.180898	0.535986	-0.227792	0.433488	0.0148397	0.959843	-0.0491338	0.867527	0.788352	0.000808379	-0.812246	0.000416451	0.216719	0.456756	0.396842	0.160052	-0.100577	0.73227
VSIG10	blue	-0.607124	0.0213058	-0.690814	0.00622737	-0.423379	0.131439	0.0317029	0.914323	0.0868138	0.767918	-0.138648	0.636426	0.323104	0.259831	0.851935	0.000109714	-0.759486	0.00162677	0.0277245	0.925045	0.409474	0.145965	0.18879	0.518031
THBD	blue	-0.607113	0.0213089	0.297133	0.302234	-0.410022	0.145373	0.544591	0.0440502	-0.75214	0.00191503	-0.107764	0.713848	-0.549876	0.0416364	0.285792	0.32193	-0.376475	0.184589	0.342479	0.230667	-0.254506	0.379901	-0.291871	0.311284
SGSM1	blue	-0.606978	0.0213456	-0.743761	0.00229175	-0.487686	0.0768947	0.108853	0.711068	-0.0924461	0.753274	0.00295353	0.992005	0.351776	0.217423	0.729084	0.00309098	-0.621244	0.0177232	0.0327671	0.911457	0.163693	0.576043	0.116556	0.691509
ABCA1	blue	0.6068	0.0213942	-0.379777	0.180456	0.712442	0.00424699	-0.712927	0.0042091	0.637655	0.0141553	0.666273	0.00927404	0.395993	0.161029	0.353839	0.21455	-0.365508	0.198748	0.361307	0.20435	0.0147664	0.960041	0.361788	0.203703
ZBED6	blue	-0.606755	0.0214063	0.332891	0.244835	-0.479159	0.0829947	0.537746	0.0473266	-0.213279	0.464105	-0.39886	0.157744	-0.579076	0.0300113	0.288025	0.317995	-0.31921	0.265949	0.479088	0.0830462	-0.173717	0.552557	0.346431	0.224977
ZNF561-AS1	blue	-0.60638	0.0215086	-0.4718	0.0885257	-0.547374	0.0427669	0.303617	0.291294	-0.22574	0.437755	-0.0747484	0.799526	0.127888	0.663056	0.473926	0.0869021	-0.376557	0.184485	0.152978	0.60159	-0.193192	0.508136	0.207277	0.477063
OPN3	blue	-0.606322	0.0215247	-0.3828	0.176725	-0.533342	0.0495268	0.251606	0.38554	-0.196473	0.500817	-0.00895832	0.975753	0.0700075	0.812026	0.575791	0.0311814	-0.542637	0.0449679	0.133093	0.650127	0.19896	0.495301	-0.0278632	0.924671
EIF2AK4	blue	-0.606174	0.0215652	-0.109214	0.710148	-0.720917	0.00362229	0.537081	0.0476543	-0.00753764	0.979597	-0.338405	0.236624	-0.233997	0.420715	0.117605	0.688858	-0.0427831	0.884537	0.0802476	0.785081	0.19998	0.493048	0.378731	0.181759
DERA	blue	-0.606075	0.0215922	-0.580956	0.0293564	-0.464196	0.094506	0.0610845	0.835666	-0.104115	0.723183	-0.345812	0.225863	0.389646	0.168461	0.631734	0.0153726	-0.53723	0.0475809	-0.360064	0.206025	0.53997	0.0462432	-0.189196	0.517116
DTNB	blue	-0.606053	0.0215983	-0.74661	0.0021576	-0.451916	0.104747	0.0547398	0.852555	0.00162336	0.995606	-0.145838	0.618854	0.392196	0.16545	0.771008	0.00124511	-0.650484	0.011771	-0.0556941	0.850011	0.287994	0.318048	0.147612	0.614548
CLPX	blue	-0.605797	0.0216686	-0.43678	0.118392	-0.34334	0.22942	0.076544	0.794802	0.0343326	0.907243	-0.240848	0.40684	0.0920834	0.754215	0.845881	0.000137625	-0.806558	0.000491606	0.159182	0.586743	0.332449	0.245501	0.147616	0.614538
CCNE1	blue	-0.605785	0.0216719	0.277912	0.336031	-0.485723	0.0782694	0.515731	0.0590701	-0.473925	0.0869023	-0.122857	0.675638	-0.533039	0.0496805	0.359839	0.206329	-0.451011	0.105532	0.312751	0.276281	0.197816	0.497836	-0.232594	0.423588
SLC22A17	blue	-0.605755	0.0216803	-0.470802	0.0892949	-0.641559	0.0133939	0.374493	0.187098	-0.153639	0.6	-0.105876	0.718673	0.0930949	0.751592	0.332557	0.245338	-0.218002	0.454028	0.136811	0.640946	-0.181855	0.533796	0.381122	0.17879
ANK3	blue	-0.605697	0.0216962	-0.414123	0.140995	-0.492544	0.0735648	0.244325	0.39989	0.0929902	0.751863	-0.0365845	0.901185	0.0019528	0.994714	0.721167	0.00360504	-0.654017	0.011172	0.431487	0.123435	0.0826957	0.778671	0.513693	0.0602543
KDELC1	blue	-0.605391	0.0217806	0.4612	0.0969377	-0.434362	0.120678	0.575952	0.0311232	-0.353559	0.214938	-0.22377	0.441869	-0.736592	0.0026586	0.353017	0.215692	-0.448802	0.107461	0.624222	0.01703	-0.134877	0.645715	0.1342	0.647388
ATP9A	blue	0.605357	0.02179	0.089359	0.761291	0.773426	0.00117493	-0.514734	0.0596474	0.0606116	0.836923	0.698641	0.00544184	0.0134693	0.963549	0.115993	0.692933	-0.248909	0.390823	0.371069	0.191484	-0.200547	0.491798	-0.265715	0.358524
TNFRSF10B	blue	-0.605167	0.0218425	-0.343654	0.228967	-0.312061	0.2774	0.174004	0.551891	-0.264042	0.361673	-0.0317302	0.914249	-0.0354177	0.904323	0.82119	0.000317207	-0.810493	0.00043856	0.384412	0.174756	-0.0687077	0.815461	0.0557634	0.849826
EXOC3L2	blue	-0.605062	0.0218717	-0.767845	0.00134188	-0.520631	0.056292	0.1192	0.684833	-0.0232487	0.937122	-0.0813205	0.78227	0.376562	0.184478	0.677339	0.00778381	-0.551985	0.0407008	-0.025898	0.929972	0.202691	0.48708	0.187714	0.520465
LRRCC1	blue	-0.604838	0.0219338	0.159292	0.586482	-0.523085	0.0549367	0.493815	0.072711	-0.010059	0.972774	-0.345228	0.2267	-0.487122	0.077288	0.393958	0.163389	-0.405457	0.150352	0.399965	0.156489	0.259359	0.370563	0.375733	0.185525
HIST1H4C	blue	-0.604806	0.0219427	-0.520506	0.0563617	-0.597657	0.0239968	0.188835	0.51793	0.0445272	0.879861	-0.244547	0.399449	0.272867	0.345238	0.498093	0.0698876	-0.394443	0.162824	-0.171593	0.5575	0.43677	0.118401	0.14964	0.609639
CTDSP1	blue	-0.60471	0.0219692	-0.299183	0.298749	-0.763112	0.00149784	0.507261	0.0641026	-0.00204186	0.994473	-0.358787	0.207757	-0.0274827	0.925697	0.0913396	0.756145	0.0469367	0.873406	0.00743319	0.97988	0.01299	0.964845	0.510326	0.0622471
HOXC6	blue	-0.604571	0.0220079	-0.76316	0.00149619	-0.50671	0.06444	0.126646	0.666155	-0.119867	0.683155	-0.0587448	0.841887	0.385505	0.17343	0.649739	0.0119004	-0.527395	0.0526139	-0.0744758	0.800243	0.164298	0.574615	0.0965546	0.74264
PIP5K1C	blue	-0.60448	0.0220334	0.119747	0.683455	-0.495127	0.0718365	0.612468	0.0198911	-0.53992	0.0462674	0.111171	0.705165	-0.549583	0.0417676	0.304876	0.289196	-0.344436	0.227839	0.745214	0.00222253	-0.683704	0.00701503	0.263719	0.362282
ATP2A3	blue	-0.604463	0.0220382	-0.421383	0.133462	-0.554464	0.0396208	0.278553	0.334871	0.0150737	0.959211	-0.0211762	0.942718	0.0506435	0.863491	0.589881	0.0263919	-0.517556	0.0580239	0.32353	0.259168	0.0330578	0.910674	0.469555	0.0902624
YY1AP1	blue	0.604404	0.0220546	-0.177961	0.542737	0.724124	0.00340572	-0.683055	0.0070906	0.614453	0.019384	0.556474	0.0387607	0.26709	0.355948	0.303064	0.292218	-0.354984	0.212966	0.320331	0.264179	0.14748	0.614868	0.222503	0.444527
HIF3A	blue	-0.604038	0.0221568	-0.605086	0.0218651	-0.548811	0.0421147	0.187953	0.519923	-0.035431	0.904288	-0.0388785	0.895019	0.238033	0.412513	0.610769	0.0203331	-0.514414	0.0598335	0.109548	0.709296	0.107355	0.714893	0.246801	0.394978
RMDN2	blue	-0.603847	0.0222102	-0.184932	0.526775	-0.531692	0.0503697	0.390664	0.167254	-0.0595708	0.83969	-0.33958	0.234896	-0.156874	0.59225	0.374394	0.187223	-0.302074	0.293876	0.256897	0.375284	-0.127443	0.664167	0.39333	0.164121
GNAL	blue	-0.603674	0.0222588	-0.466955	0.0923046	-0.579476	0.0298709	0.229136	0.430706	-0.0834695	0.776647	-0.444321	0.111451	0.260365	0.368644	0.347365	0.223645	-0.225444	0.438371	-0.342799	0.230203	0.337563	0.237866	0.142582	0.62679
NFATC4	blue	-0.603578	0.0222858	0.174474	0.550799	-0.450226	0.106215	0.519286	0.0570448	-0.242678	0.403174	-0.328637	0.251287	-0.479869	0.082474	0.333907	0.24331	-0.333571	0.243813	0.52176	0.0556658	-0.365928	0.198193	0.438463	0.116818
CDK1	blue	-0.603567	0.022289	0.225498	0.438258	-0.417151	0.13782	0.404459	0.151456	-0.325541	0.256047	-0.206706	0.478307	-0.465729	0.0932787	0.485015	0.0787701	-0.572322	0.0324535	0.288907	0.316448	0.304946	0.289081	-0.176068	0.547109
SFRP1	blue	-0.603412	0.0223325	-0.710418	0.00440798	-0.51609	0.0588632	0.174731	0.550203	-0.110706	0.706349	0.0172573	0.953307	0.284522	0.324179	0.671029	0.00860878	-0.5662	0.0347924	0.0734832	0.802857	0.147141	0.61569	0.163358	0.576835
KLF2	blue	-0.60322	0.0223866	-0.0396108	0.893052	-0.713217	0.0041866	0.665885	0.00933011	-0.19034	0.514538	-0.0501507	0.864808	-0.388163	0.17023	0.119426	0.684265	-0.0631193	0.830263	0.517406	0.0581096	-0.386616	0.172088	0.580011	0.0296843
USP36	blue	0.602999	0.0224488	-0.0142248	0.961506	0.644042	0.0129262	-0.476623	0.0848721	0.214886	0.460665	0.754286	0.00182693	0.064722	0.826012	0.0549312	0.852045	-0.15216	0.603558	0.325874	0.255532	-0.0242984	0.934288	-0.0469881	0.873269
SMARCA1	blue	-0.602855	0.0224896	-0.210959	0.469094	-0.36212	0.203258	0.176555	0.545982	-0.263201	0.36326	-0.229876	0.429176	-0.0195792	0.947032	0.660064	0.0102017	-0.664138	0.00958543	0.132554	0.651461	0.114208	0.697452	-0.169073	0.563387
PDE6B	blue	-0.602646	0.0225488	-0.545693	0.0435387	-0.565305	0.0351444	0.173131	0.553918	-0.0700583	0.811892	-0.50579	0.0650067	0.385928	0.172918	0.369937	0.192949	-0.224452	0.440443	-0.42843	0.126413	0.296959	0.30253	0.0675848	0.818431
NEMP2	blue	-0.602221	0.0226696	-0.680021	0.00745226	-0.416271	0.138738	0.0442055	0.880723	0.0436143	0.882308	-0.164364	0.574458	0.319639	0.265271	0.798507	0.000616266	-0.702487	0.00508538	-0.0178325	0.951753	0.358869	0.207644	0.106231	0.717766
ASF1B	blue	-0.602214	0.0226715	-0.0242791	0.93434	-0.422365	0.132464	0.304922	0.28912	-0.275717	0.340019	-0.084243	0.774626	-0.269602	0.351269	0.61221	0.0199578	-0.671562	0.00853657	0.232569	0.423639	0.410132	0.145255	-0.148584	0.612192
NCAPD3	blue	-0.601518	0.0228703	-0.191213	0.512575	-0.356044	0.211505	0.229772	0.429392	-0.173756	0.552466	0.0151802	0.958923	-0.208114	0.475247	0.80652	0.000492142	-0.843252	0.000151419	0.410433	0.144931	0.304348	0.290076	0.0196278	0.946901
FAM167A	blue	-0.601336	0.0229226	-0.654121	0.0111548	-0.526416	0.0531351	0.191627	0.511644	0.019192	0.948078	-0.055435	0.850702	0.240753	0.407032	0.637062	0.0142738	-0.518464	0.0575089	0.13468	0.646201	0.0991533	0.735935	0.378758	0.181725
BTD	blue	-0.601012	0.0230155	-0.198659	0.495968	-0.588556	0.0268172	0.462482	0.0958917	-0.0864073	0.768977	-0.200678	0.491507	-0.178104	0.542408	0.362147	0.203221	-0.276524	0.338549	0.371712	0.190656	-0.187461	0.521037	0.453992	0.102965
VEGFA	blue	-0.600775	0.0230839	-0.533387	0.0495038	-0.465226	0.0936799	0.18065	0.536555	0.139765	0.633686	-0.280141	0.332008	0.154451	0.598052	0.659381	0.0103079	-0.540733	0.0458758	0.153548	0.60022	0.133638	0.648777	0.497481	0.0702871
NUMB	blue	-0.600514	0.0231595	-0.206677	0.478369	-0.288617	0.316956	0.216962	0.456239	-0.334823	0.241938	0.0880584	0.764675	-0.186358	0.523536	0.836585	0.00019147	-0.877931	3.65365e-05	0.520643	0.0562852	-0.0627554	0.831229	-0.0337115	0.908914
RPRD1A	blue	-0.60048	0.0231693	-0.535218	0.0485804	-0.359018	0.207442	0.0428109	0.884463	0.0702172	0.811473	-0.185662	0.525116	0.21037	0.470364	0.881325	3.10861e-05	-0.811392	0.00042711	0.143231	0.625205	0.324885	0.257062	0.217464	0.455171
SLC43A1	blue	-0.600415	0.0231881	-0.469824	0.0900536	-0.471967	0.0883971	0.206811	0.478078	-0.415055	0.140013	0.188218	0.519324	0.137052	0.640351	0.655732	0.01089	-0.642882	0.013143	0.115501	0.694178	0.135864	0.64328	-0.21913	0.451638
SLC16A1	blue	-0.600222	0.0232439	-0.0104457	0.971728	-0.271557	0.34765	0.238919	0.410724	-0.491317	0.0743957	-0.0995023	0.735036	-0.243234	0.402064	0.682721	0.00712972	-0.760403	0.00159337	0.277162	0.337391	0.0467005	0.874039	-0.369606	0.193378
DDIT4L	blue	-0.60022	0.0232445	-0.499	0.0692995	-0.397145	0.159703	0.0817092	0.781252	-0.127762	0.663372	-0.200768	0.49131	0.244889	0.398769	0.752398	0.00190427	-0.68969	0.00634707	-0.0576731	0.844739	0.373881	0.187877	-0.0424315	0.88548
CPOX	blue	-0.600123	0.0232727	-0.243904	0.400728	-0.373021	0.188976	0.343317	0.229453	-0.637816	0.0141231	0.199466	0.494184	-0.20151	0.489675	0.606815	0.0213899	-0.645792	0.0126041	0.416473	0.138526	-0.27398	0.343193	-0.240032	0.408482
CLEC14A	blue	-0.600067	0.0232888	-0.622961	0.0173209	-0.435789	0.119325	0.11426	0.69732	-0.261182	0.367088	0.0319509	0.913655	0.282825	0.327198	0.700265	0.00528904	-0.637923	0.0141019	0.0892424	0.761594	-0.0314229	0.915077	-0.0522272	0.85926
FANCF	blue	-0.599827	0.0233588	-0.478034	0.0838234	-0.40366	0.152342	0.0708312	0.809852	-0.15297	0.601609	-0.319619	0.265302	0.315214	0.272313	0.650585	0.0117535	-0.572966	0.0322144	-0.163113	0.577414	0.212673	0.465406	-0.0811269	0.782777
MTMR11	blue	-0.599725	0.0233885	-0.465382	0.0935548	-0.567237	0.0343878	0.343433	0.229286	-0.184483	0.527798	0.0389539	0.894817	0.0439128	0.881508	0.497446	0.07031	-0.417878	0.137064	0.335685	0.240653	-0.232863	0.423036	0.315792	0.271388
AMHR2	blue	-0.599639	0.0234136	-0.574253	0.0317407	-0.549286	0.0419011	0.207393	0.476813	0.0932515	0.751186	-0.206489	0.478779	0.233195	0.422355	0.565764	0.0349635	-0.434234	0.1208	0.0954598	0.745469	0.0788725	0.788687	0.460374	0.0976154
CEMIP	blue	-0.599427	0.0234754	-0.0654027	0.824209	-0.52552	0.0536157	0.572874	0.0322487	-0.440732	0.114718	0.107637	0.714171	-0.413808	0.141328	0.361826	0.203652	-0.357352	0.209713	0.630321	0.0156744	-0.462889	0.0955615	0.309165	0.28212
NADK2	blue	-0.59934	0.0235007	-0.504201	0.0659941	-0.317176	0.269177	0.0137418	0.962812	-0.0986806	0.737154	-0.149173	0.610767	0.231319	0.426204	0.887909	2.24003e-05	-0.849712	0.00011937	0.0460773	0.875707	0.351363	0.218001	-0.0559218	0.849404
ADGRL4	blue	-0.599158	0.0235542	-0.162318	0.579296	-0.290707	0.313307	0.225962	0.437292	-0.347921	0.222856	-0.147581	0.614622	-0.147579	0.614628	0.717803	0.00384281	-0.734386	0.00278036	0.294636	0.306509	0.00815207	0.977935	-0.158479	0.588419
SDHD	blue	-0.59906	0.0235828	-0.383434	0.175949	-0.507701	0.0638341	0.178227	0.542125	-0.208569	0.474259	-0.339698	0.234724	0.237666	0.413255	0.454524	0.102511	-0.376424	0.184652	-0.270761	0.349121	0.315326	0.272133	-0.123958	0.672878
SPEF2	blue	-0.599011	0.0235972	-0.501979	0.0673919	-0.45182	0.104831	0.153644	0.599988	0.175564	0.548275	-0.151976	0.604002	0.0949412	0.746811	0.779876	0.00100305	-0.695868	0.00571072	0.295677	0.304723	0.244708	0.399128	0.511271	0.0616834
DSCC1	blue	-0.599006	0.0235986	-0.240062	0.408421	-0.484369	0.0792284	0.198867	0.495507	-0.033709	0.908921	-0.247831	0.392945	0.0072024	0.980505	0.597648	0.0239995	-0.585723	0.0277437	-0.0343203	0.907276	0.60737	0.0212393	-0.0585658	0.842363
MTURN	blue	-0.598944	0.0236169	-0.590419	0.0262206	-0.557105	0.0384935	0.15478	0.597262	0.123794	0.673288	-0.48613	0.0779834	0.344307	0.228024	0.455469	0.10171	-0.299344	0.298477	-0.292864	0.309564	0.361072	0.204666	0.292414	0.310341
PLEKHM3	blue	-0.598456	0.0237603	-0.239965	0.408615	-0.325191	0.256588	0.200668	0.49153	-0.0172409	0.953352	-0.165663	0.571394	-0.13128	0.654621	0.792889	0.000717381	-0.77263	0.00119767	0.471385	0.0888445	-0.00179029	0.995154	0.330661	0.248205
FGD6	blue	-0.59827	0.0238154	0.186155	0.523996	-0.345757	0.225942	0.410871	0.144459	-0.269204	0.352007	-0.240966	0.406604	-0.518513	0.0574812	0.558037	0.0381016	-0.618316	0.0184253	0.499286	0.0691145	0.029155	0.921188	0.0769236	0.793805
EGFR	blue	-0.598072	0.0238739	-0.679554	0.00750911	-0.447068	0.108994	0.166176	0.570188	-0.167786	0.566403	0.0920388	0.75433	0.202934	0.486548	0.735024	0.0027447	-0.654898	0.0110265	0.187027	0.52202	0.0621567	0.832818	0.12373	0.673451
MCM7	blue	-0.59778	0.0239605	-0.359194	0.207204	-0.431931	0.123006	0.183275	0.53055	-0.196709	0.500292	-0.0410852	0.889093	0.0268318	0.927453	0.694132	0.00588425	-0.694637	0.00583333	0.0649879	0.825308	0.460748	0.0973086	-0.158467	0.588448
LRIG3	blue	-0.597246	0.0241193	-0.579517	0.0298566	-0.312812	0.276183	0.02673	0.927727	-0.21396	0.462645	0.0423996	0.885566	0.22367	0.44208	0.926715	1.90721e-06	-0.899142	1.21897e-05	0.172751	0.554802	0.180379	0.537177	-0.102303	0.727834
GREM1	blue	-0.596859	0.0242349	-0.611229	0.0202126	-0.483442	0.0798895	0.135908	0.64317	0.124968	0.67035	-0.316939	0.269555	0.287214	0.31942	0.622965	0.01732	-0.487391	0.0771	0.00896354	0.975739	0.140858	0.631006	0.387904	0.17054
ADAM9	blue	-0.596743	0.0242698	0.255101	0.378748	-0.371322	0.191158	0.506169	0.0647729	-0.44437	0.111407	0.0270763	0.926793	-0.63527	0.0146364	0.526427	0.0531293	-0.620764	0.0178368	0.755455	0.00178032	-0.283292	0.326366	0.0876541	0.765728
PBK	blue	-0.596656	0.0242959	-0.257602	0.373929	-0.384327	0.17486	0.169485	0.562423	-0.203566	0.485163	-0.0854612	0.771445	-0.0445543	0.879788	0.738934	0.002534	-0.762737	0.00151079	0.101555	0.729755	0.507921	0.0637	-0.19733	0.498914
SMO	blue	-0.596622	0.0243058	-0.624864	0.0168831	-0.454007	0.102952	0.126262	0.667116	0.0963011	0.743295	-0.0920651	0.754262	0.220947	0.4478	0.75954	0.00162478	-0.658466	0.0104516	0.22415	0.441074	0.109963	0.70824	0.430329	0.124557
SYTL5	blue	-0.596454	0.0243563	-0.543626	0.0445017	-0.533904	0.0492418	0.241653	0.405226	0.130478	0.656612	-0.143663	0.62415	0.118912	0.68556	0.599143	0.0235586	-0.48468	0.0790075	0.260136	0.36908	0.0292868	0.920833	0.535582	0.0483986
BST2	blue	-0.596425	0.024365	-0.652065	0.0115001	-0.566852	0.0345372	0.154273	0.598478	0.0627889	0.83114	-0.301553	0.294751	0.374859	0.186633	0.495127	0.0718362	-0.347606	0.223304	-0.173522	0.55301	0.206248	0.479303	0.27277	0.345416
ADAM17	blue	-0.596352	0.0243871	-0.26513	0.359624	-0.285904	0.32173	0.138858	0.635912	-0.201645	0.489378	0.0165753	0.955151	-0.0883187	0.763998	0.882595	2.92253e-05	-0.91162	5.67441e-06	0.424546	0.130266	0.0964943	0.742796	0.0214388	0.942009
STRBP	blue	0.596254	0.0244164	0.38497	0.174077	0.656409	0.0107801	-0.403874	0.152104	0.293715	0.308095	0.239602	0.409345	-0.144223	0.622785	-0.182414	0.532517	0.0627295	0.831298	0.0921353	0.75408	0.16484	0.573335	-0.0997781	0.734326
GCH1	blue	-0.595854	0.024537	-0.0691825	0.814206	-0.362906	0.202206	0.248844	0.390951	-0.0758497	0.796628	-0.330697	0.248151	-0.148192	0.613141	0.622885	0.0173384	-0.610286	0.02046	0.265906	0.358165	0.094727	0.747365	0.183743	0.529484
KCNMA1	blue	-0.595343	0.0246918	-0.572556	0.0323666	-0.525221	0.0537765	0.261174	0.367104	0.00223576	0.993948	-0.100843	0.731585	0.148662	0.612005	0.554181	0.0397432	-0.432768	0.122201	0.218246	0.453511	-0.0859322	0.770217	0.466135	0.0929548
ITPRIPL2	blue	-0.594927	0.0248183	-0.606876	0.0213732	-0.46305	0.0954311	0.154489	0.59796	-0.219782	0.45026	-0.193192	0.508135	0.316725	0.269896	0.545067	0.0438287	-0.445438	0.110447	-0.104549	0.72207	-0.0121633	0.967082	-0.0309676	0.916304
IFIT2	blue	-0.594537	0.0249375	-0.481944	0.0809659	-0.561103	0.0368327	0.266651	0.35677	0.108043	0.713135	-0.157041	0.591852	0.105441	0.719787	0.516257	0.0587674	-0.407273	0.148358	0.224563	0.440211	-0.00581908	0.984248	0.513244	0.0605169
NINJ2	blue	-0.594267	0.0250201	-0.593729	0.0251855	-0.532835	0.0497846	0.18428	0.528258	-0.0664906	0.821327	-0.171939	0.556692	0.289731	0.315008	0.512382	0.0610249	-0.389875	0.168189	-0.0250701	0.932206	0.0167322	0.954726	0.27928	0.333559
CLSTN1	blue	-0.594126	0.0250633	0.135864	0.64328	-0.43821	0.117053	0.52755	0.0525316	-0.429609	0.125258	0.207154	0.477331	-0.588098	0.0269653	0.533288	0.0495538	-0.612548	0.0198705	0.838805	0.000177282	-0.325959	0.255401	0.204538	0.483035
MYBL2	blue	-0.594093	0.0250736	0.124305	0.672008	-0.480934	0.0816975	0.479419	0.0828037	-0.426214	0.128602	0.0627691	0.831193	-0.483023	0.0801897	0.431983	0.122956	-0.521025	0.0560731	0.433769	0.121242	0.113153	0.700129	-0.135516	0.644139
TXNRD1	blue	-0.594086	0.0250757	0.300476	0.296563	-0.377939	0.182749	0.508599	0.0632881	-0.386114	0.172693	-0.251226	0.386282	-0.604323	0.022077	0.386123	0.172682	-0.458427	0.0992269	0.487238	0.077207	-0.138024	0.63796	0.0125925	0.965921
FAM111A	blue	-0.593892	0.0251352	0.17106	0.558743	-0.364018	0.200724	0.361297	0.204363	-0.176312	0.546544	-0.230362	0.428174	-0.441384	0.11412	0.55837	0.0379624	-0.615528	0.0191136	0.426084	0.12873	0.149479	0.610027	0.137473	0.639315
SLC16A4	blue	-0.593862	0.0251445	-0.219874	0.450064	-0.552115	0.0406438	0.389566	0.168556	-0.0388796	0.895016	-0.152706	0.602243	-0.113078	0.700319	0.396127	0.160875	-0.331292	0.247248	0.354164	0.214099	-0.178692	0.541053	0.530324	0.0510761
GALM	blue	-0.593756	0.0251771	-0.605854	0.021653	-0.505084	0.0654444	0.0638584	0.828303	0.119246	0.684719	-0.361499	0.20409	0.392913	0.164609	0.617447	0.018638	-0.494781	0.0720664	-0.265933	0.358115	0.518152	0.0576854	0.167249	0.567664
EPS15L1	blue	0.593422	0.0252803	-0.0657217	0.823363	0.74573	0.00219835	-0.637521	0.0141821	0.284887	0.32353	0.619757	0.0180773	0.190091	0.515098	0.262332	0.364906	-0.363187	0.20183	0.212026	0.466796	0.192711	0.509214	-0.216948	0.456268
TK1	blue	-0.593314	0.0253134	0.167766	0.566451	-0.609525	0.0206611	0.587294	0.0272269	-0.530321	0.0510779	-0.0573443	0.845615	-0.45885	0.0988751	0.1426	0.626746	-0.202882	0.486662	0.155165	0.596339	0.173585	0.552864	-0.273375	0.344305
RETREG3	blue	-0.592977	0.025418	-0.551504	0.0409129	-0.319663	0.265232	0.130462	0.656651	-0.273925	0.343295	0.142985	0.625805	0.100851	0.731566	0.854035	0.000101186	-0.82356	0.000294403	0.383526	0.175837	-0.147652	0.614451	0.0631747	0.830116
MSN	blue	-0.592853	0.0254562	-0.21003	0.471098	-0.281828	0.32898	0.203846	0.484548	-0.463018	0.0954569	0.155297	0.596023	-0.168263	0.565284	0.813588	0.000400154	-0.881078	3.14586e-05	0.42136	0.133486	0.0189727	0.948671	-0.266822	0.35645
VANGL2	blue	-0.592795	0.0254744	-0.540848	0.0458208	-0.532037	0.0501924	0.190862	0.513364	0.114377	0.697023	-0.364918	0.199529	0.255185	0.378587	0.508226	0.0635141	-0.361604	0.20395	-0.0441128	0.880972	0.13609	0.642721	0.46484	0.0939891
POLA2	blue	-0.591533	0.0258688	-0.253946	0.380986	-0.598195	0.0238376	0.376941	0.184001	-0.357497	0.209514	-0.0314909	0.914894	-0.03427	0.907411	0.329224	0.250391	-0.307135	0.285456	-0.0699071	0.812292	0.335958	0.240246	-0.172033	0.556473
SORCS1	blue	-0.591113	0.0260012	-0.613736	0.019566	-0.413646	0.1415	0.159337	0.586374	-0.116107	0.692643	0.0120154	0.967482	0.179387	0.539455	0.719882	0.00369443	-0.638169	0.0140531	0.257107	0.374881	-0.0849422	0.7728	0.279477	0.333203
BISPR	blue	-0.591106	0.0260032	-0.623926	0.0170979	-0.566045	0.034853	0.169169	0.563162	0.14257	0.62682	-0.223781	0.441846	0.295595	0.304863	0.563606	0.0358197	-0.429553	0.125313	-0.00250546	0.993218	0.2273	0.43451	0.419004	0.1359
ZFYVE9	blue	-0.590897	0.0260692	-0.623284	0.017246	-0.340562	0.233459	0.0353793	0.904427	-0.0446467	0.87954	-0.0289315	0.921791	0.239994	0.408557	0.909938	6.33e-06	-0.850544	0.000115678	0.211357	0.468236	0.166951	0.568365	0.094485	0.747991
ZNF599	blue	-0.5906	0.0261634	-0.242914	0.402702	-0.387393	0.171152	0.151786	0.60446	-0.105729	0.719049	-0.320801	0.263439	0.0382594	0.896683	0.619671	0.0180979	-0.600096	0.0232804	0.0338088	0.908653	0.269373	0.351694	0.00132151	0.996423
EAPP	blue	-0.590476	0.0262027	-0.178887	0.540605	-0.708685	0.00454959	0.427506	0.127322	0.0471106	0.87294	-0.734983	0.00274699	0.0678256	0.817794	-0.00340964	0.99077	0.155109	0.596475	-0.354781	0.213246	0.229012	0.430962	0.368994	0.194174
MIS12	blue	-0.590354	0.0262414	-0.421671	0.133169	-0.340579	0.233433	0.0552634	0.851159	-0.126116	0.667479	-0.0974361	0.740364	0.159129	0.586869	0.834198	0.000207734	-0.818603	0.000343705	0.095055	0.746516	0.34081	0.233097	-0.124703	0.671014
HVCN1	blue	-0.590004	0.0263528	-0.738575	0.00255279	-0.485812	0.0782069	0.0457789	0.876507	0.0943593	0.748317	-0.274885	0.341538	0.437791	0.117444	0.676257	0.00792068	-0.540738	0.0458736	-0.220378	0.449001	0.453107	0.103722	0.152695	0.602271
CHTF18	blue	-0.58976	0.0264304	-0.240022	0.4085	-0.517134	0.0582647	0.34482	0.227286	-0.355018	0.212918	0.177213	0.544463	-0.147465	0.614905	0.564807	0.0353414	-0.588348	0.0268844	0.309765	0.281138	0.180975	0.53581	-0.0974643	0.740291
EFNB2	blue	-0.589652	0.0264651	-0.497517	0.0702631	-0.458797	0.0989188	0.194436	0.505355	0.0658886	0.822921	-0.191006	0.513039	0.133469	0.649197	0.647004	0.0123847	-0.549529	0.0417918	0.223381	0.442685	0.0236513	0.936035	0.452538	0.104211
REN	blue	-0.589473	0.0265225	-0.465191	0.0937081	-0.568394	0.0339404	0.292373	0.310413	0.0286802	0.922468	-0.0161245	0.956369	0.0454664	0.877344	0.549085	0.0419914	-0.470764	0.0893243	0.24551	0.397535	0.153726	0.599791	0.399706	0.156783
TWNK	blue	-0.588984	0.0266792	-0.453171	0.103667	-0.519272	0.0570527	0.227936	0.433189	-0.0545724	0.853002	-0.38569	0.173205	0.167505	0.567064	0.41812	0.136813	-0.315034	0.272602	-0.200508	0.491883	0.296585	0.303169	0.0835109	0.776539
GTF2A1	blue	-0.588801	0.026738	-0.0200912	0.945649	-0.430387	0.1245	0.337622	0.23778	-0.168257	0.565298	-0.685389	0.00682165	-0.129795	0.65831	0.277966	0.335932	-0.218789	0.45236	-0.161113	0.582153	0.163229	0.577141	0.0547318	0.852576
COCH	blue	-0.588697	0.0267717	0.367468	0.196168	-0.404129	0.151821	0.50717	0.0641585	-0.212766	0.465207	-0.417167	0.137802	-0.598657	0.0237012	0.337557	0.237875	-0.375614	0.185676	0.477382	0.0843074	-0.137777	0.638568	0.265472	0.35898
LAMA5	blue	-0.588426	0.0268592	-0.246737	0.395105	-0.619266	0.0181953	0.505802	0.0649992	-0.15801	0.589537	0.170589	0.559842	-0.250707	0.387297	0.404854	0.151017	-0.359293	0.207069	0.62527	0.0167908	-0.296988	0.302482	0.550973	0.0411476
MARS	blue	-0.588423	0.0268603	-0.49538	0.0716687	-0.297669	0.30132	0.115308	0.694664	-0.355763	0.211892	0.111592	0.704093	0.0821536	0.780089	0.855656	9.49783e-05	-0.851688	0.000110758	0.267912	0.354413	0.0394998	0.89335	-0.146798	0.616523
ZNF350	blue	-0.587744	0.0270804	-0.137461	0.639345	-0.398338	0.158339	0.185668	0.525102	0.211425	0.468089	-0.594323	0.0250029	-0.0651099	0.824984	0.58159	0.029138	-0.531016	0.0507177	0.020006	0.945879	0.48667	0.0776043	0.316309	0.270561
OAF	blue	-0.587658	0.0271084	-0.476409	0.0850321	-0.493667	0.0728096	0.260807	0.367803	-0.568371	0.0339492	0.221956	0.445675	0.120003	0.682811	0.534035	0.0491756	-0.523415	0.0547564	0.104809	0.721404	-0.0800268	0.785659	-0.374619	0.186938
FUT8	blue	-0.587483	0.0271653	-0.739002	0.00253043	-0.4734	0.0873016	0.0346579	0.906368	-0.0108264	0.970698	-0.2067	0.478319	0.454477	0.102552	0.662495	0.00983032	-0.544958	0.0438796	-0.243935	0.400667	0.396549	0.160389	0.00552276	0.98505
KIZ	blue	-0.587424	0.0271845	-0.461945	0.0963287	-0.545521	0.0436182	0.254398	0.380111	0.137807	0.638493	-0.124671	0.671094	0.0232558	0.937103	0.614416	0.0193935	-0.532618	0.0498951	0.23473	0.41922	0.327698	0.252724	0.426798	0.128022
PLIN3	blue	-0.58739	0.0271958	-0.183442	0.53017	-0.753899	0.00184257	0.652078	0.0114977	-0.456983	0.100433	0.0731469	0.803744	-0.228366	0.432298	0.0164756	0.95542	0.0443917	0.880224	0.257133	0.37483	-0.343272	0.229518	0.175744	0.547858
MAX	blue	-0.587213	0.0272536	-0.421682	0.133158	-0.466006	0.0930576	0.296334	0.303598	-0.405147	0.150694	0.143873	0.62364	0.0433225	0.883091	0.550556	0.0413328	-0.507259	0.064104	0.33868	0.236218	-0.369797	0.19313	0.0479393	0.870723
CAPG	blue	-0.587083	0.027296	-0.682095	0.00720344	-0.587823	0.0270546	0.189729	0.515914	-0.0921299	0.754094	-0.159466	0.586069	0.366174	0.197869	0.479725	0.0825794	-0.340972	0.23286	-0.209303	0.472671	0.282733	0.327363	0.0822214	0.779912
TDRKH	blue	-0.587055	0.027305	-0.0804034	0.784672	-0.441228	0.114263	0.29575	0.304597	-0.485323	0.0785519	-0.199906	0.493211	-0.0960316	0.743991	0.412708	0.142495	-0.435363	0.119727	-0.159494	0.586001	0.399358	0.157178	-0.461221	0.0969207
PRC1	blue	-0.587044	0.0273087	0.0993368	0.735463	-0.401659	0.154579	0.389588	0.16853	-0.40456	0.151343	0.014246	0.961449	-0.433396	0.121599	0.541484	0.0455164	-0.635301	0.01463	0.393823	0.163546	0.195661	0.502623	-0.210358	0.47039
C2orf68	blue	-0.586804	0.0273874	-0.410541	0.144814	-0.61085	0.0203118	0.214936	0.460558	-0.0259215	0.929908	-0.423293	0.131526	0.241333	0.405868	0.33045	0.248525	-0.230624	0.427635	-0.422723	0.132101	0.611906	0.0200364	-0.0516894	0.860696
FKBP9	blue	-0.586775	0.0273969	-0.154737	0.597365	-0.342346	0.23086	0.322648	0.260543	-0.334197	0.242875	0.209764	0.471675	-0.309667	0.281298	0.739687	0.00249496	-0.784772	0.000886517	0.722253	0.00353083	-0.275452	0.340502	0.1324	0.651843
PLK2	blue	-0.586301	0.0275529	-0.650427	0.0117809	-0.435162	0.119917	0.0888714	0.762559	-0.0771252	0.793275	0.0935882	0.750314	0.25682	0.375434	0.818572	0.000344035	-0.753695	0.00185086	0.177089	0.544749	0.21136	0.46823	0.0890868	0.761999
AC068152.1	blue	-0.585625	0.0277762	-0.455884	0.101359	-0.447691	0.108442	0.313913	0.274404	-0.30011	0.297181	-0.0434283	0.882807	-0.00347054	0.990605	0.500006	0.0686511	-0.433174	0.121811	0.229584	0.42978	-0.217408	0.455291	0.0923962	0.753403
PDIA6	blue	-0.58548	0.0278241	0.185914	0.524545	-0.539676	0.0463853	0.529456	0.0515285	-0.497678	0.0701583	0.00968528	0.973786	-0.476009	0.085331	0.299359	0.298452	-0.37082	0.191806	0.380257	0.17986	0.0126084	0.965878	-0.163115	0.57741
TGFB1	blue	-0.585132	0.02794	-0.668048	0.00902134	-0.552177	0.0406161	0.222853	0.443793	-0.133727	0.648557	-0.05891	0.841447	0.288659	0.316882	0.495887	0.0713334	-0.366252	0.197767	0.0467415	0.873929	-0.1043	0.722711	0.271094	0.348505
CCPG1	blue	-0.584659	0.0280977	0.41984	0.13504	-0.437417	0.117794	0.57938	0.0299044	-0.286684	0.320353	-0.18805	0.519704	-0.733366	0.00283809	0.337552	0.237882	-0.418081	0.136854	0.702043	0.00512558	-0.229588	0.429771	0.291045	0.312718
DARS2	blue	-0.584174	0.0282601	-0.558181	0.0380413	-0.344048	0.228398	0.0346709	0.906333	-0.197699	0.498095	-0.0214443	0.941994	0.22947	0.430016	0.847954	0.000127489	-0.825983	0.000272479	-0.000170381	0.999539	0.434554	0.120495	-0.21731	0.455498
EPM2AIP1	blue	-0.584154	0.0282671	-0.414186	0.140928	-0.342602	0.230489	0.104758	0.721535	0.0803788	0.784737	-0.14659	0.617027	0.027202	0.926454	0.835654	0.000197685	-0.79814	0.0006225	0.266648	0.356775	0.318673	0.266798	0.244013	0.400512
ARL6IP6	blue	-0.584008	0.0283161	-0.437499	0.117717	-0.334237	0.242815	0.0154494	0.958195	-0.160485	0.583645	-0.260145	0.369063	0.245204	0.398144	0.776407	0.00109279	-0.74272	0.00234237	-0.164643	0.573801	0.510626	0.062068	-0.232212	0.42437
CROCC	blue	-0.583854	0.0283679	-0.500226	0.0685099	-0.655377	0.0109479	0.402318	0.15384	-0.202689	0.487086	0.13398	0.647932	0.0396798	0.892867	0.374789	0.186722	-0.287588	0.318763	0.224147	0.441081	-0.0447336	0.879308	0.298888	0.299249
VPS26A	blue	0.583794	0.0283881	-0.277758	0.336309	0.819747	0.000331778	-0.851012	0.000113646	0.393335	0.164115	0.232331	0.424126	0.56087	0.0369279	0.295841	0.304442	-0.33266	0.245183	-0.273028	0.344942	0.361776	0.203719	-0.379732	0.180512
RGPD8	blue	-0.583643	0.028439	-0.259296	0.370683	-0.24983	0.389014	0.126548	0.6664	-0.344253	0.228102	-0.0342886	0.907361	-0.0381124	0.897078	0.827711	0.000257662	-0.856196	9.29791e-05	0.311843	0.277753	0.00915953	0.975208	-0.187781	0.520312
CD68	blue	-0.5833	0.0285548	-0.660945	0.0100659	-0.411814	0.143449	0.0926104	0.752848	-0.247166	0.394258	0.0711228	0.809082	0.284192	0.324764	0.763219	0.00149415	-0.701043	0.005217	0.00873244	0.976364	0.26706	0.356005	-0.109602	0.70916
LTBP4	blue	-0.583152	0.0286049	-0.561928	0.0364963	-0.463233	0.0952832	0.177665	0.543419	0.0802698	0.785023	-0.0680654	0.81716	0.142601	0.626743	0.706	0.00477598	-0.605362	0.0217886	0.318653	0.26683	-0.000693414	0.998123	0.529254	0.051634
CDCA8	blue	-0.582952	0.028673	-0.114133	0.697642	-0.448586	0.107651	0.311881	0.277692	-0.357128	0.210018	-0.0371927	0.89955	-0.188903	0.517776	0.519632	0.0568508	-0.563946	0.0356839	0.104086	0.723258	0.393696	0.163694	-0.29789	0.300944
PYGO2	blue	-0.582789	0.0287282	-0.600461	0.0231747	-0.523747	0.054575	0.211484	0.467963	-0.0165401	0.955246	-0.0571185	0.846216	0.203084	0.48622	0.55778	0.0382095	-0.4481	0.10808	0.150051	0.608646	-0.00974176	0.973633	0.415357	0.139695
NIF3L1	blue	-0.582231	0.0289183	-0.482599	0.0804938	-0.433711	0.121298	0.0808268	0.783563	0.105332	0.720065	-0.179554	0.539073	0.213878	0.462822	0.769926	0.00127756	-0.697584	0.00554317	0.0675795	0.818445	0.441897	0.11365	0.250737	0.387237
KIF14	blue	-0.582127	0.0289538	0.0612369	0.835261	-0.450261	0.106184	0.384289	0.174906	-0.190647	0.513846	-0.113598	0.698999	-0.370169	0.192648	0.50346	0.066458	-0.551616	0.0408633	0.324811	0.257177	0.304	0.290655	-0.042288	0.885866
FUT1	blue	-0.582126	0.0289543	-0.351585	0.21769	-0.417279	0.137686	0.24913	0.390388	-0.66649	0.00924295	0.14237	0.627307	0.0699879	0.812078	0.530002	0.0512438	-0.548849	0.0420978	0.0298088	0.919426	-0.027871	0.92465	-0.562742	0.0361672
SHCBP1	blue	-0.582109	0.02896	0.0571564	0.846115	-0.348852	0.221536	0.322609	0.260604	-0.386486	0.172244	-0.0015649	0.995764	-0.372295	0.189907	0.627095	0.0163807	-0.717151	0.0038903	0.374246	0.187412	0.224743	0.439834	-0.229256	0.430458
LRRC70	blue	-0.582	0.0289974	-0.360544	0.205377	-0.311571	0.278195	0.067057	0.819828	-0.0640492	0.827796	-0.224202	0.440965	0.106876	0.716116	0.823578	0.000294242	-0.793387	0.000707907	0.0655874	0.823719	0.43271	0.122257	0.0375427	0.898609
LARP6	blue	-0.581974	0.0290062	0.0404827	0.890711	-0.574792	0.031544	0.604716	0.0219678	-0.259224	0.370821	-0.314645	0.273227	-0.37074	0.19191	0.0888487	0.762618	-0.025953	0.929823	0.385151	0.173858	-0.517949	0.0578005	0.510209	0.0623176
EPHB2	blue	-0.581971	0.0290073	-0.313254	0.275469	-0.474593	0.0863963	0.362287	0.203033	-0.185333	0.525864	-0.11052	0.706821	-0.126315	0.666983	0.465014	0.0938491	-0.410183	0.1452	0.374014	0.187708	-0.263998	0.361755	0.345691	0.226037
HSD17B8	blue	-0.581949	0.0290147	-0.637421	0.0142019	-0.534967	0.0487062	0.144866	0.621219	-0.25507	0.378808	-0.129654	0.65866	0.386157	0.172641	0.479271	0.082912	-0.380581	0.179459	-0.338501	0.236483	0.355482	0.212279	-0.191914	0.511001
TRAFD1	blue	-0.581609	0.0291314	-0.567993	0.034095	-0.333448	0.243998	0.100541	0.732363	-0.182671	0.53193	-0.0256591	0.930616	0.194218	0.505842	0.773228	0.00118056	-0.707516	0.00464712	0.236481	0.415657	-0.14635	0.617611	0.117783	0.688408
IL11RA	blue	-0.581519	0.0291622	-0.0121826	0.96703	-0.617723	0.0185702	0.482708	0.0804154	0.0218545	0.940886	-0.622524	0.0174225	-0.186663	0.522845	0.0951623	0.746239	0.00658501	0.982175	0.0362279	0.902144	-0.0206104	0.944246	0.515523	0.0591902
AEBP1	blue	-0.58148	0.0291757	-0.72783	0.00316827	-0.496636	0.0708404	0.0880039	0.764817	0.0256114	0.930745	-0.0167603	0.954651	0.354145	0.214126	0.724078	0.00340876	-0.61826	0.018439	0.0320182	0.913474	0.282041	0.328599	0.180374	0.53719
SFMBT1	blue	-0.581446	0.0291873	-0.206131	0.479559	-0.294407	0.306902	0.11343	0.699426	-0.0936439	0.750169	-0.296912	0.30261	-0.030785	0.916796	0.760095	0.00160454	-0.765103	0.00143057	0.10304	0.725941	0.396736	0.160174	-0.0113644	0.969243
IVNS1ABP	blue	-0.581382	0.0292095	-0.407045	0.148608	-0.354419	0.213746	0.0998403	0.734166	0.164956	0.573061	-0.386005	0.172824	0.115752	0.693542	0.745398	0.00221388	-0.660245	0.0101736	0.131831	0.653253	0.249523	0.389616	0.38752	0.171001
TOP2A	blue	-0.58116	0.0292861	0.0315862	0.914637	-0.366923	0.196883	0.342373	0.230821	-0.253825	0.38122	0.0675238	0.818592	-0.417868	0.137075	0.679874	0.00747007	-0.759732	0.00161777	0.574365	0.0316999	0.138161	0.637624	0.0146607	0.960327
HAUS5	blue	-0.581022	0.0293337	-0.575113	0.031427	-0.569848	0.0333841	0.291233	0.31239	-0.207941	0.475622	0.191879	0.511079	0.121162	0.679896	0.536404	0.0479892	-0.459917	0.0979922	0.21649	0.457243	0.0241236	0.93476	0.221911	0.44577
GATA4	blue	-0.580621	0.0294722	-0.484672	0.079013	-0.520446	0.0563949	0.301828	0.294289	0.0128047	0.965347	-0.0360156	0.902715	0.0264203	0.928563	0.541789	0.0453705	-0.448787	0.107475	0.325397	0.256269	-0.0619336	0.833411	0.494887	0.0719961
RNF26	blue	-0.579552	0.0298444	-0.631167	0.0154931	-0.396337	0.160633	0.11604	0.692814	-0.288229	0.317636	0.244832	0.398883	0.194903	0.504313	0.795635	0.000666404	-0.769805	0.00128124	0.21086	0.469306	0.104005	0.723466	-0.0886388	0.763164
AC004980.1	blue	-0.579445	0.0298817	0.0518734	0.860205	-0.655195	0.0109777	0.603603	0.0222788	-0.160865	0.582743	-0.0608733	0.836227	-0.412774	0.142425	0.191065	0.512906	-0.170966	0.558962	0.559282	0.0375824	-0.298924	0.299188	0.523514	0.0547021
HSD17B4	blue	-0.579385	0.0299027	-0.383616	0.175727	-0.355159	0.212724	0.0726248	0.80512	-0.0669533	0.820102	-0.13115	0.654943	0.124955	0.670382	0.780753	0.000981341	-0.762416	0.00152193	0.14002	0.633059	0.267253	0.355644	-0.0110673	0.970047
ZNF252P	blue	-0.578971	0.0300481	0.369175	0.193939	-0.484371	0.0792272	0.577701	0.0304969	-0.427801	0.127032	-0.114887	0.695731	-0.660464	0.0101399	0.267587	0.355019	-0.355193	0.212678	0.448638	0.107606	0.0343263	0.90726	-0.0861291	0.769703
CDKN3	blue	-0.57897	0.0300483	0.218175	0.453661	-0.482172	0.0808018	0.464795	0.0940246	-0.339605	0.23486	-0.180046	0.537941	-0.47121	0.08898	0.330629	0.248254	-0.405863	0.149904	0.210235	0.470656	0.329572	0.24986	-0.210481	0.470124
PPIF	blue	-0.578909	0.0300699	-0.600026	0.0233008	-0.561384	0.036718	0.164815	0.573394	-0.0853394	0.771763	-0.121582	0.678839	0.321882	0.261742	0.528853	0.0518442	-0.430617	0.124277	-0.18302	0.531132	0.412829	0.142367	0.0441714	0.880814
PI4K2A	blue	-0.578833	0.0300964	-0.129662	0.658639	-0.245336	0.397882	0.198917	0.495397	-0.483596	0.0797791	-0.0701865	0.811554	-0.139774	0.633662	0.695084	0.00578863	-0.738203	0.00257241	0.240516	0.407507	-0.027406	0.925904	-0.274062	0.343043
GART	blue	-0.578596	0.0301801	-0.498486	0.0696327	-0.275189	0.340982	0.0388821	0.89501	-0.199667	0.49374	0.0773888	0.792582	0.123858	0.67313	0.95338	1.34002e-07	-0.95029	1.95631e-07	0.266055	0.357886	0.222543	0.444442	-0.0994039	0.73529
KATNB1	blue	-0.578553	0.0301952	-0.722602	0.00350718	-0.502528	0.0670448	0.169292	0.562874	-0.251669	0.385416	0.184917	0.52681	0.283142	0.326633	0.647384	0.0123165	-0.566104	0.0348298	0.106985	0.715837	0.0304906	0.917589	0.00828443	0.977576
SLC22A15	blue	-0.578488	0.0302183	-0.433637	0.121369	-0.633662	0.0149677	0.290944	0.312893	0.114096	0.697736	-0.334521	0.24239	0.164553	0.574012	0.329867	0.249411	-0.197136	0.499345	-0.0454913	0.877277	0.161464	0.581321	0.397516	0.159278
KCTD16	blue	-0.578327	0.0302752	-0.532005	0.050209	-0.415301	0.139754	0.194176	0.505936	-0.0409251	0.889523	-0.0857752	0.770626	0.105139	0.72056	0.646859	0.0124109	-0.563283	0.0359496	0.276568	0.33847	-0.120316	0.682024	0.367809	0.195722
FKBP11	blue	-0.577397	0.0306051	-0.149583	0.609775	-0.65481	0.011041	0.54491	0.0439015	-0.0616751	0.834097	-0.146332	0.617655	-0.234375	0.419944	0.203275	0.485799	-0.121516	0.679006	0.376772	0.184214	-0.215396	0.459575	0.547098	0.0428928
NUSAP1	blue	-0.577385	0.0306095	0.182592	0.532111	-0.432932	0.122043	0.42458	0.130232	-0.350217	0.219609	-0.0411044	0.889042	-0.479945	0.0824183	0.475098	0.0860158	-0.567438	0.0343095	0.38475	0.174346	0.252695	0.383417	-0.141686	0.628979
SLC39A6	blue	-0.577205	0.0306737	-0.189352	0.516763	-0.293894	0.307785	0.227377	0.43435	-0.116667	0.691229	-0.0324597	0.912285	-0.205849	0.480173	0.795064	0.000676763	-0.80439	0.000522969	0.575297	0.0313602	-0.0860341	0.769951	0.285379	0.322659
CLK2	blue	-0.577045	0.0307306	0.0593798	0.840198	-0.537963	0.0472201	0.370868	0.191744	-0.271858	0.347094	-0.535209	0.048585	-0.157066	0.59179	0.134667	0.646235	-0.124982	0.670314	-0.288054	0.317944	0.369598	0.193389	-0.273563	0.343959
CRIPT	blue	-0.576922	0.0307747	-0.279048	0.333977	-0.63895	0.0138991	0.323763	0.258805	-0.00270667	0.992673	-0.731102	0.0029697	0.188988	0.517584	0.0744777	0.800238	0.0733564	0.803191	-0.476203	0.0851864	0.30061	0.296338	0.215512	0.459328
TGFBR2	blue	-0.576003	0.0311049	0.318883	0.266466	-0.379095	0.181305	0.524443	0.0541969	-0.638898	0.0139093	0.0732189	0.803554	-0.634804	0.0147318	0.401971	0.154229	-0.525262	0.0537541	0.60096	0.0230307	-0.24808	0.392454	-0.255636	0.377715
TFB2M	blue	-0.575324	0.0313506	-0.431601	0.123324	-0.297984	0.300784	0.0467379	0.873938	-0.290729	0.313267	-0.216992	0.456174	0.24459	0.399364	0.730529	0.00300376	-0.694825	0.00581454	-0.0793091	0.787542	0.166245	0.570026	-0.273684	0.343737
RHOBTB2	blue	-0.574903	0.0315034	-0.292309	0.310523	-0.519943	0.0566763	0.36259	0.202628	-0.237123	0.414355	0.221374	0.446901	-0.183624	0.529755	0.548998	0.0420306	-0.560221	0.0371945	0.435364	0.119727	0.0703622	0.81109	0.11679	0.690916
CLCN3	blue	-0.574476	0.0316592	-0.107339	0.714932	-0.256956	0.375172	0.222299	0.444955	-0.283008	0.326872	-0.0256211	0.930719	-0.258786	0.371659	0.779802	0.0010049	-0.828723	0.000249294	0.452237	0.10447	0.0810552	0.782965	-0.054623	0.852867
SLC20A2	blue	-0.574268	0.0317351	0.120969	0.68038	-0.319455	0.265561	0.395308	0.161821	-0.403157	0.152903	-0.0569335	0.846709	-0.466575	0.0926056	0.582068	0.0289741	-0.648717	0.0120796	0.537883	0.0472594	-0.0831766	0.777413	0.012489	0.966201
ASPM	blue	-0.574126	0.0317871	-0.0124128	0.966407	-0.379029	0.181386	0.293075	0.3092	-0.132658	0.651205	-0.0137079	0.962904	-0.326952	0.25387	0.679344	0.00753489	-0.738485	0.0025575	0.462886	0.0955638	0.279318	0.333489	0.0625447	0.831788
TARS2	blue	-0.573993	0.0318359	-0.70427	0.00492645	-0.371519	0.190904	0.0406577	0.890241	-0.2029	0.486622	0.023663	0.936003	0.320107	0.264532	0.800471	0.000583738	-0.740298	0.0024636	-0.0038963	0.989453	0.25758	0.373972	-0.162686	0.578426
AMBRA1	blue	-0.573798	0.0319079	-0.598832	0.0236497	-0.419587	0.135299	0.209439	0.472377	-0.232539	0.4237	0.184768	0.527148	0.118895	0.685603	0.703915	0.00495774	-0.636559	0.0143749	0.370182	0.192631	-0.214467	0.461559	0.178968	0.540419
RNFT1	blue	-0.57379	0.0319107	0.182854	0.531513	-0.312536	0.27663	0.316208	0.270722	-0.267976	0.354293	-0.330957	0.247755	-0.350037	0.219863	0.524539	0.0541452	-0.56618	0.0347999	0.309495	0.281579	0.0247515	0.933065	0.0576268	0.844862
GLB1L2	blue	-0.573657	0.0319595	0.0582057	0.843321	-0.367888	0.195618	0.395042	0.162129	-0.427637	0.127193	0.178996	0.540354	-0.445358	0.110518	0.59911	0.0235681	-0.687479	0.00658776	0.674744	0.00811532	-0.209995	0.471174	0.0105729	0.971384
RASL10A	blue	-0.573164	0.0321415	-0.588579	0.0268099	-0.576175	0.0310427	0.287203	0.319439	-0.247355	0.393885	0.0912228	0.756448	0.192988	0.508593	0.440862	0.114598	-0.344435	0.227839	0.0914736	0.755797	-0.0695994	0.813105	0.135155	0.645029
IGSF3	blue	-0.573143	0.0321491	-0.736953	0.0026391	-0.461018	0.0970871	0.076272	0.795517	0.018059	0.95114	-0.070628	0.810388	0.364769	0.199726	0.691741	0.00612996	-0.5753	0.0313593	0.0411246	0.888988	0.114058	0.697831	0.261105	0.367235
MYOZ3	blue	-0.572549	0.0323694	-0.694004	0.00589723	-0.520705	0.056251	0.0921697	0.753991	0.0564932	0.847881	-0.247465	0.393667	0.418952	0.135954	0.566177	0.0348014	-0.424994	0.129818	-0.220291	0.449184	0.349206	0.221035	0.181669	0.534222
MSX2	blue	-0.572244	0.0324826	-0.576629	0.0308796	-0.579053	0.0300192	0.283158	0.326604	0.0644672	0.826688	-0.0531509	0.856794	0.131266	0.654655	0.510998	0.061846	-0.391284	0.166523	0.197456	0.498633	0.0937555	0.74988	0.471833	0.0885004
MBTD1	blue	-0.572166	0.0325116	-0.102908	0.72628	-0.524842	0.0539812	0.374807	0.186699	0.155491	0.59556	-0.400225	0.156195	-0.19754	0.498447	0.358031	0.208785	-0.296452	0.303396	0.296114	0.303973	0.0145859	0.96053	0.628083	0.0161619
DENND5A	blue	-0.572062	0.0325503	-0.0504775	0.863934	-0.30435	0.290072	0.282202	0.328312	-0.167697	0.566614	-0.2564	0.376241	-0.266594	0.356877	0.6279	0.0162022	-0.637441	0.0141978	0.383615	0.175728	-0.00075974	0.997943	0.116338	0.692059
ESPL1	blue	-0.571796	0.03265	-0.141423	0.629622	-0.328956	0.250799	0.24466	0.399223	-0.328071	0.252154	0.109503	0.709411	-0.242391	0.403748	0.750823	0.00197075	-0.814134	0.00039367	0.414928	0.140146	0.213795	0.463	-0.150672	0.607145
CNTN4	blue	-0.571766	0.0326612	-0.526997	0.0528251	-0.537712	0.0473434	0.257898	0.373361	0.0293495	0.920664	-0.0909576	0.757137	0.12821	0.662254	0.527206	0.0527144	-0.41404	0.141083	0.260966	0.3675	-0.103842	0.723884	0.454459	0.102566
SLCO3A1	blue	-0.571441	0.0327826	-0.772707	0.00119544	-0.399685	0.156807	0.00150907	0.995915	-0.0800692	0.785548	0.00901824	0.975591	0.409294	0.146159	0.822329	0.000306078	-0.734713	0.00276204	-0.0445873	0.8797	0.341828	0.231613	-0.0247774	0.932996
IL1RAPL1	blue	-0.571145	0.032894	-0.270419	0.349753	-0.468641	0.0909767	0.347796	0.223033	0.041134	0.888962	5.46481e-05	0.999852	-0.186566	0.523064	0.602261	0.0226582	-0.552495	0.040477	0.633333	0.0150362	-0.211214	0.468544	0.628035	0.0161725
FBLN2	blue	-0.571119	0.0329038	-0.412654	0.142553	-0.563668	0.0357952	0.389878	0.168187	-0.0873715	0.766464	0.0946847	0.747474	-0.0654584	0.824061	0.462351	0.0959981	-0.382119	0.177562	0.490619	0.0748717	-0.297995	0.300765	0.506084	0.0648253
EVA1B	blue	-0.570977	0.0329573	-0.304433	0.289933	-0.723453	0.0034502	0.546175	0.0433162	-0.267692	0.354823	-0.0262686	0.928972	-0.0693437	0.81378	0.0805405	0.784313	0.0239541	0.935218	0.197716	0.498057	-0.323198	0.259685	0.382625	0.176939
CHSY3	blue	-0.570833	0.0330115	-0.125956	0.667879	-0.272605	0.345719	0.186281	0.523712	-0.128855	0.660648	-0.314933	0.272764	-0.131219	0.654771	0.686625	0.00668259	-0.678681	0.00761644	0.300628	0.296308	0.00155631	0.995787	0.197872	0.497711
PACSIN2	blue	0.570827	0.0330138	0.00907894	0.975426	0.623414	0.017216	-0.395575	0.161512	0.212684	0.465381	0.818186	0.000348138	-0.0340728	0.907942	0.0685344	0.815919	-0.167039	0.568159	0.604683	0.0219769	-0.382969	0.176517	0.164999	0.572961
ST6GAL1	blue	-0.570809	0.0330202	-0.739234	0.00251839	-0.428807	0.126043	0.0639449	0.828073	0.039942	0.892163	0.0252212	0.931798	0.327456	0.253097	0.794523	0.000686679	-0.690625	0.00624736	0.164844	0.573327	0.132231	0.652262	0.293286	0.308834
CDC42EP1	blue	-0.57069	0.0330651	-0.645703	0.0126204	-0.527969	0.0523099	0.233364	0.42201	-0.290139	0.314296	0.0804602	0.784524	0.242058	0.404414	0.503672	0.0663249	-0.41237	0.142856	0.058121	0.843547	-0.067852	0.817724	0.0665089	0.821279
SALL2	blue	-0.570523	0.0331285	-0.71569	0.00399835	-0.431337	0.12358	0.0427952	0.884505	0.0417493	0.887311	-0.0463067	0.875093	0.367635	0.195949	0.775732	0.00111097	-0.6702	0.00872203	0.0626144	0.831603	0.216368	0.457503	0.261251	0.366957
FURIN	blue	-0.570093	0.0332912	-0.204621	0.482854	-0.601659	0.0228299	0.516298	0.0587437	-0.362214	0.203132	0.0569405	0.84669	-0.168858	0.56389	0.219242	0.451401	-0.166802	0.568715	0.374771	0.186745	-0.452861	0.103933	0.279683	0.332832
ANAPC5	blue	-0.56937	0.0335661	-0.0209221	0.943405	-0.329131	0.250533	0.282855	0.327146	-0.465261	0.0936522	-0.051835	0.860307	-0.243153	0.402225	0.607654	0.0211624	-0.66753	0.00909447	0.266027	0.357938	0.12097	0.680379	-0.313321	0.275361
TRIP13	blue	-0.569323	0.0335842	0.0958275	0.744519	-0.398133	0.158572	0.342416	0.230758	-0.374695	0.186842	-0.1156	0.693926	-0.343522	0.229157	0.483703	0.0797026	-0.565082	0.0352326	0.174739	0.550185	0.36907	0.194076	-0.318958	0.266347
KCTD18	blue	-0.567995	0.0340941	-0.146708	0.61674	-0.287149	0.319535	0.137075	0.640295	-0.153916	0.599336	-0.400897	0.155436	-0.00611129	0.983458	0.615357	0.0191564	-0.597017	0.0241877	0.0351766	0.904972	0.158831	0.587579	-0.0335344	0.909391
DIAPH3	blue	-0.56792	0.034123	-0.152074	0.603765	-0.358308	0.208408	0.233212	0.422322	-0.0811474	0.782723	-0.0161214	0.956378	-0.230194	0.428522	0.746679	0.00215444	-0.780734	0.0009818	0.410079	0.145312	0.343962	0.228521	0.0988713	0.736662
PHF13	blue	-0.567841	0.0341534	-0.390986	0.166874	-0.314329	0.273735	0.0785085	0.789642	-0.263474	0.362745	-0.287912	0.318193	0.169559	0.562248	0.621987	0.0175483	-0.596036	0.024482	-0.131033	0.655234	0.188895	0.517794	-0.329242	0.250364
SLC37A4	blue	-0.56752	0.0342776	-0.58468	0.0280906	-0.392049	0.165622	0.0598652	0.838907	-0.340214	0.233968	-0.0434207	0.882827	0.345057	0.226946	0.649211	0.0119928	-0.599356	0.0234961	-0.164798	0.573434	0.196047	0.501764	-0.314394	0.273631
JAK2	blue	-0.566848	0.0345391	0.131846	0.653216	-0.3029	0.292492	0.33677	0.23904	-0.336263	0.239793	0.0266386	0.927974	-0.451182	0.105383	0.665303	0.00941456	-0.759205	0.00163713	0.572051	0.0325547	0.0458409	0.876341	-0.0548367	0.852297
UBFD1	blue	-0.566754	0.0345755	-0.407709	0.147882	-0.253935	0.381007	0.101922	0.728812	-0.20644	0.478885	0.131623	0.653768	-0.0100663	0.972755	0.907902	7.20599e-06	-0.919769	3.23351e-06	0.478487	0.0834891	-0.0453223	0.87773	0.0567978	0.84707
MYOF	blue	0.566681	0.034604	0.104671	0.721759	0.676179	0.00793065	-0.402993	0.153086	0.109286	0.709966	0.772481	0.00120196	-0.0885562	0.763379	0.0785027	0.789657	-0.205863	0.480142	0.543895	0.0443756	-0.314136	0.274046	-0.0701412	0.811673
IL18R1	blue	-0.566662	0.0346115	-0.700358	0.00528035	-0.444202	0.111558	0.0868968	0.767701	0.0953417	0.745775	-0.135149	0.645045	0.332167	0.245926	0.700493	0.00526784	-0.571815	0.0326426	0.0849099	0.772884	0.114193	0.697489	0.361903	0.203549
SLC38A2	blue	-0.566092	0.0348347	-0.510565	0.0621043	-0.256571	0.375911	0.0186269	0.949606	-0.0537845	0.855103	-0.0260245	0.92963	0.140688	0.631422	0.954986	1.08967e-07	-0.92629	1.97258e-06	0.296873	0.302677	0.179081	0.540159	0.105087	0.720692
EPB41	blue	-0.565761	0.0349646	-0.524219	0.0543185	-0.343643	0.228982	0.0735286	0.802738	0.142127	0.627901	-0.0981739	0.73846	0.128389	0.661808	0.862484	7.21208e-05	-0.791388	0.000746514	0.327464	0.253084	0.174896	0.549821	0.439976	0.115415
C19orf12	blue	-0.565507	0.0350647	-0.408545	0.146972	-0.591417	0.0259054	0.331831	0.246434	-0.473534	0.0871998	-0.0150504	0.959273	0.144511	0.622084	0.290265	0.314075	-0.224726	0.43987	-0.18556	0.525349	0.15334	0.60072	-0.266889	0.356325
PRIM1	blue	-0.565495	0.0350693	-0.0543674	0.853548	-0.491431	0.0743182	0.2632	0.363263	-0.0818641	0.780847	-0.427523	0.127306	-0.083663	0.776142	0.382914	0.176585	-0.37686	0.184103	-0.187874	0.520101	0.64695	0.0123945	-0.114773	0.69602
ROBO3	blue	-0.564664	0.0353981	-0.673899	0.00822558	-0.545789	0.0434944	0.158759	0.587752	0.00875724	0.976297	-0.0396309	0.892998	0.30731	0.285168	0.588157	0.0269462	-0.471304	0.0889072	0.00527077	0.985733	0.249255	0.390144	0.282572	0.32765
KCNG1	blue	-0.564595	0.0354256	-0.68206	0.00720767	-0.515871	0.0589896	0.174025	0.551841	-0.140719	0.631348	0.0134057	0.963721	0.297499	0.301609	0.592755	0.0254868	-0.486625	0.0776356	0.0419515	0.886768	0.102236	0.728005	0.129015	0.660251
CNOT6L	blue	-0.564376	0.0355125	-0.520233	0.0565139	-0.345929	0.225696	0.0674131	0.818885	-0.190634	0.513876	-0.198935	0.495356	0.23725	0.414097	0.691323	0.00617373	-0.639172	0.0138556	-0.119574	0.683892	0.341999	0.231364	-0.24664	0.395298
MIXL1	blue	-0.564301	0.0355422	-0.58909	0.0266451	-0.432168	0.122777	0.08106	0.782952	0.150359	0.607901	-0.398389	0.15828	0.31547	0.271904	0.593566	0.0252357	-0.458723	0.0989808	-0.112931	0.700691	0.241835	0.404861	0.355754	0.211904
NAALAD2	blue	-0.564234	0.035569	-0.723458	0.00344987	-0.418141	0.136792	0.0642488	0.827267	0.0681581	0.816915	0.0271935	0.926477	0.296957	0.302534	0.822091	0.000308384	-0.722885	0.00348816	0.205348	0.481266	0.172553	0.555262	0.298499	0.299909
ASF1A	blue	-0.563887	0.0357077	-0.082822	0.77834	-0.348347	0.222251	0.214498	0.461495	-0.109844	0.708543	-0.474944	0.0861319	-0.0549488	0.851998	0.528999	0.0517676	-0.491435	0.0743155	0.0124961	0.966181	0.243557	0.401421	0.0340756	0.907934
CRBN	blue	-0.563852	0.0357213	-0.504235	0.0659726	-0.439626	0.115739	0.0849425	0.772799	0.142689	0.626528	-0.43696	0.118222	0.309835	0.281023	0.585718	0.0277452	-0.456608	0.100748	-0.143513	0.624517	0.314289	0.273799	0.353659	0.214799
TMEM200B	blue	-0.563819	0.0357349	-0.576908	0.0307798	-0.536713	0.0478361	0.195275	0.503483	0.176609	0.545858	-0.151701	0.604663	0.206525	0.478699	0.57736	0.0306184	-0.453473	0.103409	0.139282	0.634871	0.180236	0.537506	0.506089	0.0648223
DLG5	blue	-0.563806	0.0357399	-0.336636	0.23924	-0.431563	0.123361	0.233633	0.42146	0.122144	0.677428	-0.17583	0.547659	-0.0184655	0.950042	0.645383	0.0126788	-0.57516	0.0314101	0.349839	0.220142	0.0969115	0.741718	0.562624	0.0362149
F8	blue	-0.563742	0.0357653	-0.328028	0.252219	-0.460859	0.0972171	0.308992	0.282404	-0.0413181	0.888468	0.0298538	0.919305	-0.10286	0.726402	0.583459	0.0285012	-0.538842	0.0467905	0.521702	0.0556975	-0.211509	0.467908	0.444761	0.111054
GEMIN4	blue	-0.563547	0.0358437	-0.708167	0.0045926	-0.358793	0.207749	0.0203008	0.945083	-0.270654	0.34932	0.119741	0.68347	0.352408	0.21654	0.820606	0.000323039	-0.771114	0.00124195	-0.00413105	0.988817	0.247664	0.393275	-0.229068	0.430846
RECQL4	blue	-0.562899	0.0361039	0.204681	0.482723	-0.513581	0.0603199	0.559097	0.0376595	-0.38666	0.172034	0.119726	0.683509	-0.591178	0.0259806	0.344036	0.228415	-0.426825	0.127996	0.563965	0.0356762	0.0424405	0.885456	0.0681534	0.816927
DOCK11	blue	-0.5626	0.0362243	-0.619672	0.0180976	-0.388951	0.169289	0.0472242	0.872636	-0.140808	0.631127	-0.263118	0.363417	0.353226	0.215401	0.636876	0.014311	-0.547507	0.0427059	-0.291389	0.31212	0.433218	0.12177	-0.198278	0.49681
DIRC2	blue	-0.562563	0.0362394	-0.588267	0.0269107	-0.279279	0.33356	-0.00926577	0.974921	-0.276451	0.338682	-0.0305313	0.917479	0.312744	0.276292	0.827592	0.000258667	-0.790368	0.000766857	-0.00675601	0.981713	0.166371	0.569728	-0.218719	0.452508
CHST3	blue	-0.562266	0.0363596	-0.66879	0.00891727	-0.51155	0.0615171	0.122345	0.676924	0.0530166	0.857153	-0.234718	0.419245	0.34713	0.223981	0.569189	0.0336354	-0.439121	0.116206	-0.195073	0.503934	0.446329	0.109651	0.162311	0.579313
AUH	blue	-0.562105	0.0364247	-0.309148	0.282147	-0.656313	0.0107957	0.354124	0.214154	-0.135915	0.643153	-0.305849	0.287582	0.111126	0.705279	0.146364	0.617576	-0.0493984	0.866819	-0.161603	0.58099	0.072577	0.805246	0.0838325	0.775699
C10orf25	blue	-0.561575	0.0366399	-0.659334	0.0103152	-0.465246	0.0936636	0.0986435	0.737249	0.0500967	0.864952	-0.103951	0.723605	0.329568	0.249866	0.64766	0.0122672	-0.533149	0.0496245	0.0737939	0.802039	0.0761313	0.795887	0.344972	0.227068
LYPD6B	blue	-0.561486	0.0366762	-0.650544	0.0117607	-0.4078	0.147783	-0.0222764	0.939747	-0.0245933	0.933492	-0.214771	0.460909	0.434406	0.120636	0.714099	0.00411868	-0.624247	0.0170241	-0.256775	0.37552	0.497814	0.0700692	-0.0621291	0.832892
ZNF724	blue	-0.561471	0.0366824	-0.368292	0.19509	-0.382505	0.177087	0.154959	0.596833	0.169506	0.562373	-0.198283	0.496801	-0.0341595	0.907709	0.736734	0.00265091	-0.690345	0.00627713	0.272623	0.345686	0.365838	0.198312	0.388875	0.16938
KNL1	blue	-0.56132	0.036744	0.373974	0.187759	-0.467792	0.0916438	0.550814	0.0412185	-0.297006	0.302451	-0.0754222	0.797752	-0.665622	0.00936815	0.339584	0.23489	-0.432925	0.122051	0.556509	0.0387458	0.0936179	0.750237	0.105566	0.719466
HEYL	blue	-0.56119	0.0367971	-0.536951	0.0477184	-0.572971	0.0322126	0.252024	0.384724	0.17368	0.552642	-0.201759	0.489128	0.173397	0.553299	0.457389	0.100093	-0.318842	0.266531	0.137161	0.640084	0.0483578	0.869603	0.588424	0.0268599
ZNF646	blue	-0.560718	0.0369901	-0.520879	0.0561538	-0.33213	0.245981	0.125563	0.668862	-0.0987928	0.736864	0.214808	0.460832	0.0434835	0.882659	0.887586	2.27731e-05	-0.861343	7.5593e-05	0.495559	0.0715506	0.00492873	0.986658	0.255255	0.378452
CCNB2	blue	-0.560338	0.0371461	-0.157186	0.591503	-0.355371	0.212432	0.191177	0.512654	-0.220725	0.448268	-0.0517843	0.860443	-0.127	0.665273	0.678413	0.00764961	-0.72478	0.00336275	0.156818	0.592383	0.458441	0.0992152	-0.215035	0.460347
SLC27A3	blue	-0.560299	0.0371622	-0.265973	0.358041	-0.600789	0.0230798	0.447033	0.109024	-0.633537	0.0149937	0.0738607	0.801863	-0.023931	0.93528	0.156114	0.594068	-0.13229	0.652116	-0.0451897	0.878085	-0.112621	0.701479	-0.398516	0.158136
MYO6	blue	-0.56002	0.037277	-0.559769	0.037381	-0.321643	0.262116	0.0121782	0.967041	0.170704	0.559572	-0.202429	0.487655	0.207215	0.4772	0.883965	2.73221e-05	-0.807518	0.000478222	0.146861	0.616369	0.396509	0.160435	0.313655	0.274821
ZBTB22	blue	-0.55988	0.0373348	-0.481649	0.0811791	-0.550644	0.0412939	0.316277	0.270612	-0.251352	0.386035	0.200578	0.491728	0.0766337	0.794566	0.461246	0.0969003	-0.394494	0.162765	0.271495	0.347765	-0.163959	0.575415	0.23678	0.41505
EXOSC5	blue	-0.559623	0.037441	-0.600862	0.0230589	-0.639063	0.013877	0.267669	0.354866	-0.0790254	0.788286	-0.205142	0.481715	0.318149	0.26763	0.274181	0.342826	-0.127771	0.663348	-0.209955	0.471262	0.102149	0.728229	0.17715	0.544609
COG5	blue	-0.559606	0.0374484	-0.299669	0.297926	-0.213967	0.46263	0.0565504	0.847729	-0.258118	0.37294	-0.107011	0.715771	0.0332015	0.910287	0.855333	9.61875e-05	-0.871216	4.9623e-05	0.19219	0.510381	0.192779	0.509061	-0.190233	0.514778
ELF2	blue	-0.557874	0.0381698	-0.397863	0.158881	-0.278293	0.33534	0.0640379	0.827826	-0.0344377	0.90696	-0.000408656	0.998894	0.028376	0.923288	0.907239	7.51201e-06	-0.908301	7.02687e-06	0.369938	0.192947	0.204473	0.483177	0.0811187	0.782799
SLC9A9	blue	-0.557664	0.0382581	-0.719229	0.00374058	-0.402436	0.153708	0.0278297	0.924761	0.0957288	0.744774	-0.0789143	0.788577	0.359886	0.206266	0.788131	0.00081304	-0.674965	0.00808662	0.0776694	0.791845	0.223635	0.442152	0.292776	0.309715
RNF168	blue	-0.557596	0.0382868	-0.377743	0.182994	-0.461011	0.0970924	0.121927	0.677974	0.0586548	0.842126	-0.360413	0.205554	0.159303	0.586456	0.557252	0.0384318	-0.503485	0.0664422	-0.203095	0.486194	0.665122	0.00944096	-0.0272964	0.9262
ELMOD3	blue	0.557127	0.0384845	-0.0704644	0.81082	0.531743	0.0503435	-0.416891	0.13809	0.221765	0.446077	0.747889	0.00209947	0.107303	0.715026	0.0160847	0.956477	-0.0800669	0.785554	0.294466	0.306801	-0.00313689	0.991508	0.0606904	0.836713
NONO	blue	0.557002	0.0385371	-0.259185	0.370896	0.73721	0.00262526	-0.706912	0.0046981	0.228179	0.432686	0.437387	0.117822	0.423639	0.131177	0.220248	0.449275	-0.281125	0.330239	-0.137614	0.638969	0.2303	0.428303	-0.449741	0.106639
TMEM263	blue	-0.556978	0.0385473	0.282395	0.327966	-0.378218	0.182399	0.4836	0.0797765	-0.339646	0.234799	0.00461345	0.987512	-0.608225	0.0210084	0.472792	0.0877652	-0.558292	0.0379946	0.73714	0.00262902	-0.242541	0.403449	0.169721	0.561871
SBNO2	blue	-0.55672	0.0386564	-0.146362	0.617582	-0.51778	0.0578965	0.521915	0.0555802	-0.451569	0.105047	0.185131	0.526324	-0.293192	0.308998	0.333919	0.243291	-0.311628	0.278103	0.595867	0.0245331	-0.556474	0.038761	0.31099	0.279139
HERC6	blue	-0.556579	0.0387163	-0.608728	0.0208735	-0.319874	0.264899	0.024622	0.933415	-0.049617	0.866235	-0.167229	0.567711	0.299022	0.299023	0.735187	0.00273563	-0.652493	0.0114276	0.0327254	0.911569	0.0586187	0.842222	0.129156	0.659898
TMEM167A	blue	-0.556476	0.0387599	-0.264945	0.359971	-0.252646	0.383512	0.0549218	0.85207	-0.0728973	0.804401	-0.345379	0.226484	0.0646801	0.826124	0.73533	0.00272774	-0.714711	0.00407209	0.0445514	0.879796	0.273126	0.344761	-0.0188472	0.94901
SELENBP1	blue	-0.556164	0.0388927	-0.763758	0.00147574	-0.480784	0.0818065	0.0671343	0.819623	-0.191951	0.510919	0.0261395	0.92932	0.450665	0.105832	0.614369	0.0194052	-0.514191	0.059963	-0.168688	0.564287	0.222265	0.445027	-0.11009	0.707915
CKS1B	blue	-0.555586	0.0391391	-0.342476	0.230671	-0.572074	0.032546	0.22047	0.448806	-0.0351466	0.905053	-0.385138	0.173874	0.185092	0.526411	0.333644	0.243703	-0.250789	0.387137	-0.390704	0.167207	0.672843	0.00836494	-0.0696957	0.81285
PPFIA3	blue	-0.555552	0.0391534	-0.49127	0.0744281	-0.671651	0.00852465	0.289541	0.315339	0.00504062	0.986355	-0.291852	0.311316	0.269383	0.351675	0.216469	0.457287	-0.0744694	0.80026	-0.232581	0.423614	0.20249	0.487522	0.27584	0.339794
GBE1	blue	-0.555501	0.0391753	0.225241	0.438794	-0.341096	0.232678	0.357676	0.209269	-0.531904	0.0502607	-0.451897	0.104764	-0.297396	0.301785	0.303566	0.291379	-0.349669	0.220382	-0.0741389	0.80113	0.174932	0.549739	-0.451152	0.105409
ARHGEF16	blue	-0.555376	0.0392288	-0.692169	0.00608546	-0.52288	0.055049	0.0810542	0.782968	-0.0651555	0.824864	-0.247497	0.393605	0.484027	0.0794715	0.482232	0.0807583	-0.35042	0.219324	-0.3793	0.181048	0.372474	0.189676	-0.0289849	0.921647
PDLIM4	blue	-0.55497	0.0394032	-0.717131	0.00389172	-0.50843	0.0633905	0.173296	0.553535	-0.208843	0.473667	0.0204455	0.944692	0.343311	0.229463	0.528027	0.0522795	-0.416491	0.138507	-0.0484957	0.869234	0.0468483	0.873643	0.0481061	0.870276
CPT2	blue	-0.554952	0.0394107	-0.512889	0.0607258	-0.593462	0.0252677	0.30015	0.297114	-0.118979	0.685392	-0.205251	0.481478	0.195072	0.503936	0.249189	0.390272	-0.125312	0.66949	-0.122874	0.675596	-0.0131508	0.964411	0.13002	0.65775
DUSP10	blue	-0.554915	0.0394266	-0.681778	0.0072411	-0.501881	0.0674542	0.15131	0.605606	0.117514	0.689087	-0.136886	0.640761	0.300819	0.295985	0.577574	0.0305421	-0.439365	0.11598	0.0665776	0.821097	0.0950255	0.746593	0.414487	0.140611
C1orf56	blue	-0.554912	0.0394278	-0.370453	0.192281	-0.624626	0.0169374	0.361818	0.203662	0.0752687	0.798156	-0.447616	0.108508	0.117015	0.690348	0.198548	0.496214	-0.0406237	0.890332	-0.0780292	0.7909	0.0416498	0.887578	0.498238	0.0697936
WDR76	blue	-0.553471	0.040051	0.0360021	0.902752	-0.321558	0.26225	0.236625	0.415365	-0.247455	0.393687	-0.164915	0.573159	-0.264278	0.361228	0.617269	0.0186817	-0.688374	0.00648948	0.186842	0.52244	0.431369	0.123549	-0.244581	0.399382
XYLT2	blue	-0.553385	0.0400881	-0.0684181	0.816227	-0.668272	0.0089898	0.654024	0.0111709	-0.504983	0.0655068	0.241125	0.406284	-0.355812	0.211824	0.0871338	0.767084	-0.0700615	0.811884	0.504859	0.0655842	-0.497379	0.0703532	0.235271	0.418118
MCM6	blue	-0.553341	0.0401074	-0.181493	0.534624	-0.335376	0.241114	0.153189	0.601081	-0.242874	0.402784	-0.0759654	0.796323	-0.0724179	0.805665	0.684975	0.00686884	-0.728881	0.00310338	0.0717641	0.807389	0.50825	0.0634996	-0.304611	0.289638
GUCD1	blue	-0.553135	0.040197	-0.113379	0.699554	-0.447017	0.109039	0.414323	0.140784	-0.588767	0.0267491	0.392345	0.165274	-0.311542	0.278242	0.490227	0.0751401	-0.56005	0.0372648	0.507221	0.0641269	-0.171244	0.558312	-0.203689	0.484893
NAB1	blue	-0.552624	0.0404205	-0.675861	0.00797126	-0.420207	0.134663	0.0353801	0.904425	0.197049	0.499537	-0.187581	0.520764	0.338948	0.235824	0.745959	0.00218769	-0.627237	0.0163491	0.0428759	0.884289	0.292972	0.309378	0.376895	0.184059
KIF20A	blue	-0.552426	0.0405071	-0.129609	0.658771	-0.345188	0.226758	0.258153	0.372872	-0.319265	0.26586	0.141815	0.628663	-0.251859	0.385045	0.690406	0.00627059	-0.759996	0.00160813	0.394582	0.162663	0.236178	0.416272	-0.192361	0.509999
ATP8B1	blue	-0.552414	0.0405124	-0.244613	0.399318	-0.261979	0.365575	0.149964	0.608856	-0.0591149	0.840902	0.00509269	0.986215	-0.134545	0.646536	0.847532	0.000129499	-0.85931	8.21109e-05	0.558479	0.0379166	-0.0200655	0.945718	0.296011	0.30415
SIX5	blue	-0.552096	0.0406521	0.030556	0.917413	-0.721766	0.00356394	0.689612	0.00635549	-0.346609	0.224724	0.0415083	0.887958	-0.386856	0.171798	-0.0187387	0.949304	0.0520752	0.859666	0.379092	0.181308	-0.297769	0.301151	0.320796	0.263446
HJURP	blue	-0.552017	0.0406868	0.0367236	0.900811	-0.379283	0.18107	0.327491	0.253043	-0.300734	0.296129	-0.0469902	0.873263	-0.343182	0.229648	0.542906	0.044841	-0.613546	0.0196144	0.271758	0.34728	0.358943	0.207544	-0.198067	0.497278
CEBPB	blue	-0.55201	0.0406899	-0.626418	0.016532	-0.594736	0.0248765	0.260549	0.368293	-0.05297	0.857277	-0.0341077	0.907848	0.264372	0.361049	0.413273	0.141896	-0.276495	0.338602	0.0536033	0.855587	-0.0303562	0.917951	0.33424	0.242811
CERK	blue	-0.551994	0.0406969	0.186288	0.523696	-0.292281	0.310572	0.42442	0.130392	-0.539959	0.0462487	0.0543076	0.853708	-0.545392	0.0436781	0.514031	0.0600564	-0.618061	0.0184876	0.599493	0.0234562	-0.235085	0.418497	-0.131276	0.65463
BLM	blue	-0.551947	0.0407176	-0.429995	0.124882	-0.287864	0.318277	0.0427188	0.88471	-0.00828696	0.97757	-0.0575209	0.845144	0.0777433	0.791651	0.897896	1.30853e-05	-0.886715	2.3806e-05	0.196674	0.50037	0.472862	0.0877119	0.0374284	0.898916
ANKHD1	blue	0.551807	0.0407789	-0.355249	0.2126	0.698933	0.00541411	-0.697542	0.00554722	0.619394	0.0181645	0.56488	0.0353124	0.353285	0.215319	0.429644	0.125224	-0.450617	0.105874	0.292088	0.310908	0.237497	0.413597	0.289768	0.314943
RCC2	blue	-0.551533	0.0409001	-0.432805	0.122165	-0.296378	0.303523	0.123898	0.673028	-0.222796	0.443911	-0.119615	0.683788	0.110281	0.707431	0.690876	0.00622084	-0.647031	0.0123799	0.160729	0.583065	-0.0554169	0.85075	0.0200404	0.945786
SPC25	blue	-0.55151	0.04091	-0.0426936	0.884777	-0.432354	0.122598	0.25388	0.381114	-0.0833928	0.776848	-0.270647	0.349332	-0.175712	0.547931	0.502784	0.0668831	-0.525849	0.0534385	0.0289271	0.921803	0.600174	0.0232578	-0.113194	0.700025
MCMBP	blue	-0.551214	0.0410408	-0.525193	0.0537914	-0.23624	0.416147	-0.0185958	0.94969	-0.152748	0.602144	0.0145337	0.960671	0.188585	0.518495	0.942549	4.58333e-07	-0.93209	1.22188e-06	0.154646	0.597584	0.306243	0.28693	-0.125317	0.669476
ANKS6	blue	-0.551196	0.041049	-0.149573	0.6098	-0.566215	0.0347863	0.492636	0.0735029	-0.0719611	0.80687	-0.0321193	0.913201	-0.266025	0.357942	0.314596	0.273306	-0.258398	0.372402	0.525183	0.0537967	-0.295704	0.304676	0.499536	0.0689533
PCDHB7	blue	0.550504	0.041356	-0.0516845	0.860709	0.631348	0.0154547	-0.420521	0.134342	0.206215	0.479376	0.768337	0.00132644	0.0233619	0.936816	0.124264	0.672112	-0.197418	0.498717	0.563293	0.0359453	-0.386639	0.17206	0.172868	0.554529
BCAM	blue	-0.55031	0.0414427	-0.387061	0.171551	-0.491353	0.0743711	0.281953	0.328756	-0.0292857	0.920836	0.110878	0.705911	-0.0186742	0.949478	0.590771	0.026109	-0.534202	0.0490912	0.497868	0.0700344	-0.160518	0.583566	0.507665	0.0638555
CD1D	blue	-0.550142	0.0415175	-0.59769	0.0239871	-0.533798	0.0492953	0.179898	0.538281	0.170391	0.560303	-0.0912495	0.756379	0.231821	0.425172	0.580785	0.0294155	-0.457722	0.0998146	0.150026	0.608704	0.168128	0.5656	0.482999	0.0802067
TENM3	blue	-0.549968	0.0415954	-0.284915	0.323482	-0.386403	0.172344	0.273854	0.343424	0.0567565	0.84718	-0.177706	0.543325	-0.125767	0.668351	0.618794	0.0183095	-0.552368	0.0405323	0.427802	0.12703	-0.0249414	0.932553	0.557069	0.0385088
DNM3	blue	0.549758	0.041689	0.197993	0.497443	0.64024	0.0136475	-0.364807	0.199675	0.18742	0.521129	0.487403	0.077092	-0.0927426	0.752505	-0.0451184	0.878276	-0.0625444	0.831789	0.409584	0.145846	-0.292675	0.309891	0.0305252	0.917496
CENPI	blue	-0.549455	0.0418251	0.101537	0.729801	-0.357149	0.20999	0.325122	0.256695	-0.303258	0.291894	-0.157783	0.59008	-0.369758	0.193181	0.488708	0.0761853	-0.55816	0.0380499	0.207532	0.47651	0.332386	0.245596	-0.210784	0.469471
NAGA	blue	-0.549377	0.0418601	-0.375238	0.186152	-0.401139	0.155164	0.296548	0.303233	-0.275749	0.339961	0.28008	0.332117	-0.136603	0.641459	0.653424	0.011271	-0.655979	0.0108498	0.534103	0.0491411	-0.151256	0.605737	0.0728141	0.804621
PRKCQ	blue	-0.54918	0.0419488	-0.707292	0.00466592	-0.394134	0.163184	0.00294086	0.992039	0.0798763	0.786054	-0.0656671	0.823508	0.371633	0.190757	0.776789	0.0010826	-0.681165	0.00731426	0.0146575	0.960336	0.300137	0.297137	0.173953	0.552009
HYOU1	blue	-0.549127	0.0419726	-0.00960837	0.973994	-0.377084	0.183822	0.393974	0.163369	-0.408398	0.147132	0.305021	0.288956	-0.431041	0.123867	0.623789	0.0171295	-0.704841	0.00487634	0.750921	0.00196655	-0.211043	0.468913	0.0488484	0.86829
UGP2	blue	-0.549106	0.0419821	-0.376586	0.184449	-0.512935	0.0606989	0.2828	0.327242	-0.260736	0.367937	-0.118425	0.686789	0.0821016	0.780225	0.374214	0.187453	-0.31295	0.275959	0.0575056	0.845185	-0.0512909	0.861761	-0.00409277	0.988921
RBM23	blue	-0.548815	0.0421128	-0.751783	0.00193001	-0.32676	0.254166	-0.0372465	0.899405	-0.108982	0.71074	0.0473876	0.872199	0.403584	0.152427	0.878577	3.5442e-05	-0.807315	0.000481029	0.011418	0.969098	0.283008	0.326871	-0.0696728	0.812911
TACR1	blue	-0.54873	0.0421513	-0.761539	0.00155272	-0.374881	0.186605	-0.0332707	0.910101	0.0621949	0.832717	-0.0886916	0.763027	0.430704	0.124193	0.817178	0.000359051	-0.710494	0.00440186	-0.0244718	0.93382	0.309944	0.280845	0.158247	0.588973
ABCA7	blue	-0.548484	0.0422624	0.0724397	0.805608	-0.661934	0.00991513	0.65306	0.011332	-0.188473	0.518748	-0.0709247	0.809604	-0.447237	0.108844	0.0516071	0.860916	-0.00903738	0.975539	0.505134	0.0654131	-0.35501	0.212929	0.553115	0.0402057
SNX33	blue	-0.548482	0.0422632	-0.561857	0.0365255	-0.37893	0.18151	0.162311	0.579314	-0.474452	0.0865036	0.255843	0.377316	0.199291	0.49457	0.65583	0.010874	-0.627626	0.0162628	0.176463	0.546195	-0.153465	0.600419	-0.218582	0.452798
RFC4	blue	-0.54826	0.0423641	0.262706	0.364198	-0.582995	0.0286583	0.512447	0.0609861	-0.0236934	0.935921	-0.422438	0.13239	-0.442854	0.112779	0.18267	0.531932	-0.184881	0.526892	0.173719	0.552552	0.398908	0.157689	0.286414	0.32083
ADPRH	blue	-0.548008	0.0424784	-0.653133	0.0113196	-0.499648	0.0688816	0.10368	0.724299	-0.23517	0.418324	-0.207189	0.477256	0.461917	0.0963515	0.428937	0.125916	-0.311261	0.278699	-0.43149	0.123431	0.308034	0.283976	-0.229833	0.429266
STAC	blue	0.547267	0.0428154	-0.321126	0.262927	0.618121	0.0184729	-0.642232	0.0132659	0.180103	0.537811	0.528587	0.0519844	0.451456	0.105146	0.136382	0.642003	-0.180035	0.537966	-0.233188	0.42237	0.38933	0.168838	-0.482391	0.0806435
AXL	blue	-0.546979	0.0429473	-0.692675	0.00603313	-0.460963	0.0971321	0.10614	0.717997	0.0616304	0.834216	-0.146655	0.616869	0.332625	0.245236	0.634321	0.0148312	-0.508773	0.0631824	-0.0461938	0.875396	0.294563	0.306633	0.240626	0.407286
ARL13B	blue	0.54637	0.0432263	-0.219288	0.451304	0.710848	0.00437342	-0.731861	0.00292502	0.42893	0.125922	-0.0698907	0.812335	0.535221	0.0485788	0.0455438	0.877137	-0.0319841	0.913566	-0.472411	0.0880567	0.306501	0.286503	-0.279434	0.33328
SSTR1	blue	-0.546367	0.0432281	-0.155642	0.595197	-0.36085	0.204964	0.276893	0.33788	-0.0991741	0.735882	0.177454	0.543907	-0.276574	0.338459	0.732128	0.00290945	-0.764822	0.00143991	0.688198	0.00650874	-0.0391373	0.894324	0.331073	0.247581
IMPA2	blue	-0.545945	0.0434223	-0.458406	0.0992442	-0.489414	0.0756982	0.147742	0.614233	-0.318059	0.267773	-0.158326	0.588784	0.269011	0.352366	0.43878	0.116523	-0.391046	0.166803	-0.359036	0.207418	0.474328	0.0865973	-0.419894	0.134985
UNC5D	blue	-0.545794	0.043492	-0.644491	0.0128429	-0.498673	0.069511	0.158731	0.587818	0.12624	0.66717	-0.0598536	0.838938	0.258157	0.372865	0.60887	0.0208357	-0.480258	0.0821896	0.167707	0.566589	0.0737932	0.802041	0.474136	0.0867426
TNFRSF19	blue	0.545702	0.0435347	-0.0106741	0.97111	0.657157	0.0106597	-0.512233	0.0611125	0.149218	0.610658	0.697401	0.00556088	0.114644	0.696348	0.15688	0.592235	-0.260219	0.368921	0.349389	0.220777	-0.15186	0.604281	-0.135723	0.643627
NGFR	blue	-0.545471	0.0436414	-0.696396	0.00565876	-0.41979	0.135091	0.0761135	0.795934	0.0680711	0.817145	-0.154867	0.597054	0.348088	0.222618	0.64984	0.0118828	-0.522201	0.0554224	0.0507875	0.863106	0.0326233	0.911844	0.339522	0.234981
SERINC1	blue	-0.54483	0.0439387	0.365174	0.199189	-0.27414	0.342901	0.455444	0.101731	-0.540481	0.0459968	-0.178432	0.541652	-0.605772	0.0216756	0.382651	0.176908	-0.483677	0.0797217	0.50438	0.0658824	-0.292615	0.309993	-0.156479	0.593193
CCDC85A	blue	-0.544631	0.0440315	-0.0611074	0.835605	-0.288309	0.317496	0.294567	0.306627	-0.316786	0.269799	0.173398	0.553297	-0.335282	0.241253	0.691012	0.00620645	-0.755317	0.00178578	0.669167	0.00886466	-0.212206	0.46641	0.130787	0.655845
CTSO	blue	-0.54438	0.0441488	-0.500726	0.0681899	-0.292168	0.310769	0.096478	0.742838	-0.0945298	0.747875	0.152759	0.602117	0.0656602	0.823526	0.876185	3.96293e-05	-0.849421	0.000120686	0.46413	0.0945594	-0.0354963	0.904112	0.274264	0.342673
SPCS3	blue	-0.544327	0.0441736	-0.634676	0.0147582	-0.303022	0.292288	-0.0243666	0.934104	0.10294	0.726199	-0.125052	0.67014	0.299319	0.298518	0.884906	2.60742e-05	-0.801513	0.000567064	0.151824	0.604368	0.223596	0.442233	0.241575	0.405382
STIL	blue	-0.543261	0.0446735	-0.174481	0.550784	-0.278625	0.334741	0.159354	0.586334	-0.203842	0.484558	0.026254	0.929011	-0.159686	0.585544	0.768014	0.00133657	-0.824677	0.000284129	0.321315	0.262632	0.311097	0.278966	-0.137538	0.639156
TTK	blue	-0.543198	0.0447033	-0.216742	0.456707	-0.270112	0.350322	0.118089	0.687635	-0.15041	0.607777	-0.0087846	0.976223	-0.104156	0.723079	0.824198	0.000288499	-0.867975	5.71852e-05	0.296073	0.304044	0.372406	0.189764	-0.127515	0.663986
ACSL3	blue	-0.542841	0.0448717	0.258797	0.371638	-0.275059	0.34122	0.382148	0.177525	-0.551076	0.0411021	-0.0107482	0.97091	-0.526574	0.0530505	0.511519	0.0615356	-0.633633	0.0149738	0.488068	0.0766286	-0.0875526	0.765993	-0.309693	0.281255
MORC4	blue	-0.542729	0.0449247	-0.104129	0.723147	-0.262346	0.36488	0.181509	0.534587	-0.468408	0.0911595	0.0265313	0.928263	-0.14927	0.610533	0.651891	0.0115296	-0.723139	0.00347113	0.277243	0.337244	-0.0278129	0.924807	-0.345548	0.226241
PRKCQ-AS1	blue	-0.542728	0.0449251	-0.229531	0.42989	-0.66965	0.00879776	0.354245	0.213987	0.03402	0.908084	-0.44483	0.110993	0.0776707	0.791842	0.128848	0.660666	-0.0237551	0.935755	-0.215605	0.459129	0.334572	0.242314	0.21975	0.450326
JAG1	blue	-0.542619	0.0449765	-0.257019	0.37505	-0.220504	0.448734	0.102211	0.728069	-0.0781749	0.790518	-0.243862	0.400812	-0.0408377	0.889758	0.775738	0.00111081	-0.76396	0.00146888	0.290859	0.313041	0.0586443	0.842154	0.149139	0.610848
ELL2	blue	-0.542589	0.0449907	-0.362906	0.202205	-0.343838	0.2287	0.211423	0.468095	-0.0486251	0.868888	-0.122307	0.67702	-0.0115208	0.96882	0.660913	0.0100707	-0.594196	0.0250418	0.355379	0.212421	-0.0889541	0.762344	0.350359	0.21941
MXRA5	blue	-0.54237	0.0450944	-0.414917	0.140157	-0.50517	0.0653907	0.332682	0.245149	-0.0265855	0.928117	0.0831527	0.777476	-0.0437311	0.881995	0.521259	0.055943	-0.443311	0.112364	0.502165	0.0672742	-0.235447	0.41776	0.558684	0.0378312
ZNF19	blue	-0.542181	0.0451841	-0.235969	0.416698	-0.42978	0.125092	0.201788	0.489065	0.163256	0.577076	-0.464509	0.0942543	-0.0300884	0.918673	0.48569	0.0782933	-0.421735	0.133103	-0.00252079	0.993176	0.449707	0.106668	0.369382	0.193669
CENPM	blue	-0.541655	0.0454346	-0.00128961	0.996509	-0.538891	0.0467666	0.405184	0.150653	-0.343344	0.229414	-0.0363812	0.901732	-0.238527	0.411514	0.299114	0.298866	-0.334238	0.242813	0.0595457	0.839756	0.398774	0.157842	-0.189877	0.515581
GABRB3	blue	-0.541595	0.0454631	0.0746296	0.799838	-0.529792	0.0513533	0.537036	0.0476765	-0.235464	0.417725	-0.315969	0.271103	-0.340887	0.232984	0.0841655	0.774829	-0.0371916	0.899553	0.373229	0.18871	-0.540225	0.0461201	0.459837	0.0980578
POC1A	blue	-0.541566	0.0454773	-0.194662	0.504851	-0.501081	0.0679629	0.293637	0.308229	-0.392347	0.165272	-0.197599	0.498316	-0.00745244	0.979828	0.28439	0.324413	-0.278717	0.334574	-0.270804	0.349041	0.453161	0.103676	-0.417417	0.137543
KCTD20	blue	-0.540776	0.045855	-0.289862	0.314778	-0.176412	0.546312	0.0449075	0.878842	-0.269635	0.351208	-0.0797158	0.786475	0.00316911	0.991421	0.856456	9.20282e-05	-0.881955	3.01509e-05	0.210537	0.470004	0.17421	0.551413	-0.215499	0.459354
SMG5	blue	0.540576	0.0459511	0.1218	0.678293	0.636862	0.0143138	-0.373635	0.188191	-0.0903839	0.758627	0.734755	0.0027597	-0.054999	0.851864	-0.0115462	0.968751	-0.123848	0.673155	0.346681	0.22462	-0.284421	0.324358	-0.306749	0.286094
GLUD1	blue	-0.540515	0.0459807	-0.45498	0.102123	-0.263018	0.363606	0.0738348	0.801931	-0.343763	0.228809	0.241468	0.405597	0.074352	0.800569	0.866798	6.01521e-05	-0.896966	1.37878e-05	0.317795	0.268192	0.0811757	0.782649	-0.267586	0.355022
NPPC	blue	-0.54023	0.046118	-0.130368	0.656885	-0.616403	0.0188956	0.544067	0.0442948	-0.366739	0.197125	0.141696	0.628955	-0.252851	0.383114	0.145974	0.618523	-0.120219	0.682268	0.422346	0.132483	-0.436229	0.11891	0.234555	0.419577
APH1B	blue	-0.540196	0.0461342	-0.28229	0.328153	-0.301451	0.294922	0.16033	0.584012	-0.484938	0.0788245	-0.023625	0.936106	0.048992	0.867906	0.623056	0.0172989	-0.62998	0.0157479	0.0539621	0.854629	0.0783674	0.790013	-0.4379	0.117342
CD164	blue	-0.539765	0.0463422	-0.451503	0.105105	-0.215122	0.46016	0.0122618	0.966815	-0.109276	0.709991	-0.0219719	0.940569	0.120802	0.6808	0.917152	3.89755e-06	-0.897557	1.3338e-05	0.30542	0.288293	0.0805793	0.784212	0.0639433	0.828077
CEP44	blue	-0.539703	0.0463723	-0.537829	0.047286	-0.253096	0.382637	-0.0279865	0.924338	0.0283531	0.92335	-0.0603533	0.837609	0.214886	0.460664	0.950268	1.96132e-07	-0.910471	6.11587e-06	0.199244	0.494673	0.325026	0.256844	0.105764	0.718961
SEMA5B	blue	-0.539666	0.0463905	-0.633387	0.015025	-0.4823	0.0807091	0.148615	0.612117	0.140555	0.631749	-0.0515725	0.861009	0.240123	0.408298	0.620767	0.0178362	-0.501811	0.0674989	0.185185	0.526199	0.0781201	0.790662	0.444457	0.111328
ABCC1	blue	-0.53961	0.0464174	0.15112	0.606064	-0.429168	0.12569	0.559776	0.037378	-0.328447	0.251577	-0.0697735	0.812645	-0.527544	0.0525348	0.261964	0.365603	-0.273651	0.343797	0.696699	0.00562907	-0.62845	0.0160812	0.419521	0.135367
LSAMP	blue	-0.539339	0.0465489	-0.030025	0.918843	-0.520607	0.0563056	0.466062	0.0930134	0.0109976	0.970235	-0.162842	0.578055	-0.336012	0.240167	0.314848	0.272901	-0.280416	0.331513	0.546714	0.0430688	-0.246391	0.395789	0.575535	0.0312741
ZNF214	blue	-0.538577	0.0469199	-0.41826	0.136669	-0.374517	0.187068	0.0689371	0.814855	-0.192053	0.510689	-0.520638	0.056288	0.353685	0.214763	0.404497	0.151412	-0.310253	0.28034	-0.449706	0.106669	0.213733	0.463133	-0.249078	0.39049
ERCC6L	blue	-0.53829	0.0470602	-0.158847	0.587541	-0.262186	0.365182	0.116598	0.691403	-0.111176	0.705151	-0.0960657	0.743903	-0.127609	0.663752	0.801157	0.000572719	-0.843142	0.000152015	0.250379	0.387939	0.453915	0.10303	-0.084056	0.775115
BARD1	blue	-0.53825	0.0470794	0.0794293	0.787226	-0.289431	0.315531	0.243013	0.402505	-0.310797	0.279453	-0.114276	0.697279	-0.29383	0.307895	0.607678	0.0211558	-0.691343	0.0061717	0.255323	0.378319	0.309296	0.281904	-0.182414	0.532516
PRR11	blue	-0.538179	0.0471142	0.270301	0.349973	-0.458659	0.0990341	0.510226	0.0623072	-0.26779	0.35464	-0.104739	0.721583	-0.596775	0.0242602	0.311238	0.278736	-0.391167	0.16666	0.431418	0.123502	0.184234	0.528365	0.0261583	0.929269
ALCAM	blue	-0.537947	0.047228	0.389428	0.168721	-0.428298	0.126543	0.601168	0.0229709	-0.235147	0.418369	-0.183293	0.53051	-0.722893	0.0034876	0.272639	0.345656	-0.324863	0.257096	0.743026	0.00232742	-0.33872	0.23616	0.447483	0.108626
ZNF853	blue	-0.537678	0.0473604	-0.605332	0.021797	-0.395648	0.161428	0.112651	0.701404	0.164503	0.574129	-0.0512042	0.861992	0.177745	0.543235	0.754768	0.00180761	-0.654674	0.0110634	0.323016	0.259968	0.068745	0.815363	0.522092	0.0554826
ERP44	blue	-0.537643	0.0473773	0.369757	0.193183	-0.400593	0.155779	0.474301	0.0866178	-0.190183	0.514891	-0.440946	0.114521	-0.557118	0.0384882	0.249498	0.389666	-0.294153	0.30734	0.375162	0.186249	-0.0579403	0.844028	0.130453	0.656675
TBL2	blue	-0.53748	0.0474577	-0.50352	0.0664205	-0.384146	0.17508	0.224284	0.440793	-0.27522	0.340925	0.312649	0.276447	-0.00446505	0.987913	0.699956	0.00531782	-0.679572	0.00750694	0.52673	0.0529677	-0.266791	0.356508	0.118601	0.686346
DENND4C	blue	-0.537238	0.0475768	-0.216678	0.456843	-0.224888	0.439532	0.139087	0.635349	-0.161678	0.580812	0.0618777	0.833559	-0.148231	0.613047	0.868633	5.55779e-05	-0.898416	1.27053e-05	0.542807	0.0448877	0.00475588	0.987126	0.112991	0.70054
SLC6A6	blue	-0.537161	0.0476148	-0.6467	0.0124395	-0.362292	0.203027	0.12032	0.682014	-0.0722367	0.806143	0.126333	0.666937	0.182013	0.533435	0.766437	0.00138685	-0.69048	0.00626275	0.368288	0.195095	-0.133103	0.650101	0.266482	0.357087
TONSL	blue	-0.536706	0.0478394	-0.107129	0.71547	-0.497953	0.0699791	0.388249	0.170127	-0.200979	0.490845	0.144204	0.622831	-0.281802	0.329026	0.446779	0.10925	-0.480058	0.0823354	0.394785	0.162428	0.183066	0.531027	0.115592	0.693946
UNG	blue	-0.536561	0.0479115	-0.670403	0.00869417	-0.422515	0.132312	-0.00632034	0.982892	-0.106523	0.71702	-0.145032	0.620815	0.457163	0.100283	0.648413	0.0121333	-0.564398	0.035504	-0.332314	0.245705	0.545717	0.0435276	-0.205568	0.480786
GTSE1	blue	-0.536112	0.0481345	0.107342	0.714927	-0.406782	0.148895	0.42092	0.133934	-0.478132	0.0837514	0.0883849	0.763825	-0.439177	0.116154	0.402513	0.153622	-0.49762	0.070196	0.359113	0.207314	0.101464	0.729989	-0.262297	0.364972
C12orf4	blue	0.535743	0.0483183	-0.280055	0.332161	0.744311	0.00226534	-0.777728	0.0010579	0.294818	0.306196	0.34671	0.22458	0.50188	0.0674547	0.307427	0.284975	-0.357126	0.210021	-0.272466	0.345974	0.487321	0.0771493	-0.460784	0.0972784
PRDM2	blue	0.53554	0.0484194	-0.11078	0.706159	0.591637	0.025836	-0.533977	0.0492049	0.782208	0.000946111	0.202917	0.486585	0.189026	0.5175	0.146486	0.61728	-0.13916	0.63517	0.21506	0.460294	0.223911	0.441575	0.491209	0.0744697
ZBTB49	blue	-0.535388	0.0484954	-0.0330772	0.910622	-0.22429	0.440782	0.22416	0.441054	-0.280211	0.331882	-0.0609929	0.835909	-0.288567	0.317044	0.715694	0.00399804	-0.767186	0.00136279	0.464189	0.0945115	-0.0166387	0.954979	-0.0540431	0.854413
THAP9	blue	-0.535009	0.0486852	-0.425064	0.129747	-0.253341	0.38216	0.068609	0.815722	-0.2953	0.305369	-0.0302403	0.918263	0.166488	0.569453	0.728906	0.00310189	-0.710621	0.00439161	0.123504	0.674018	-0.0205703	0.944355	-0.148394	0.612651
SGK1	blue	-0.535007	0.0486863	-0.520027	0.0566291	-0.399057	0.15752	0.12819	0.662305	0.221933	0.445724	-0.184567	0.527606	0.126228	0.6672	0.702425	0.00509095	-0.607923	0.0210897	0.232898	0.422964	0.233376	0.421985	0.511926	0.0612944
FANCI	blue	-0.534391	0.0489958	-0.17821	0.542164	-0.264088	0.361586	0.124761	0.670867	-0.163359	0.576833	-0.027213	0.926424	-0.122861	0.675628	0.788796	0.000799081	-0.837765	0.000183818	0.257315	0.37448	0.412642	0.142565	-0.155683	0.5951
PPIL2	blue	-0.534147	0.0491191	-0.0778118	0.791471	-0.363735	0.2011	0.384519	0.174626	-0.600725	0.0230985	0.370497	0.192224	-0.333627	0.243729	0.531464	0.0504871	-0.612711	0.0198284	0.576527	0.0309162	-0.288116	0.317835	-0.191261	0.512468
PEX5	blue	-0.533964	0.0492113	-0.204717	0.482644	-0.520817	0.0561885	0.462894	0.0955574	-0.393134	0.164351	0.285446	0.32254	-0.229558	0.429834	0.350686	0.21895	-0.346039	0.225538	0.574568	0.0316257	-0.489107	0.0759095	0.199471	0.494173
GCN1	blue	-0.533374	0.0495101	-0.0523238	0.859002	-0.278221	0.335471	0.320749	0.26352	-0.340419	0.233667	0.249122	0.390404	-0.397349	0.15947	0.721495	0.00358251	-0.793904	0.000698183	0.767053	0.00136703	-0.218112	0.453796	0.0960476	0.74395
ZNF160	blue	-0.533178	0.0496099	-0.184145	0.528568	-0.344695	0.227467	0.288479	0.317198	-0.0467941	0.873788	-0.0251782	0.931914	-0.270095	0.350354	0.648743	0.0120751	-0.637845	0.0141175	0.563777	0.0357513	-0.0254011	0.931312	0.408174	0.147375
PLPPR3	blue	-0.532755	0.0498252	-0.685528	0.00680597	-0.466095	0.0929868	0.117863	0.688207	0.0614629	0.834661	-0.160829	0.582828	0.351908	0.217238	0.562327	0.0363347	-0.417485	0.137472	-0.00841688	0.977218	0.0717228	0.807499	0.352475	0.216447
P2RX4	blue	-0.532736	0.049835	-0.0416582	0.887555	-0.301272	0.295223	0.218588	0.452786	-0.558975	0.0377098	-0.00978298	0.973521	-0.15734	0.591137	0.552257	0.0405813	-0.625315	0.0167807	0.102807	0.726539	0.174848	0.549933	-0.483469	0.0798702
TMEM39A	blue	-0.532704	0.0498511	-0.0804773	0.784479	-0.257646	0.373844	0.16643	0.56959	-0.138499	0.636793	-0.0870447	0.767316	-0.191776	0.511309	0.764236	0.00145954	-0.803903	0.000530239	0.434692	0.120363	0.12113	0.679975	0.0499485	0.865348
PTPN9	blue	-0.532472	0.04997	0.0710697	0.809222	-0.226546	0.436076	0.284381	0.324429	-0.49695	0.0706343	0.0015416	0.995827	-0.36781	0.19572	0.610911	0.0202957	-0.704125	0.00493924	0.425996	0.128818	-0.0811433	0.782734	-0.317494	0.26867
CECR2	blue	-0.531476	0.0504805	-0.251916	0.384935	-0.547041	0.0429187	0.32475	0.257271	0.225071	0.439149	-0.391582	0.166171	-0.0231954	0.937266	0.327022	0.253763	-0.211358	0.468235	0.0948967	0.746926	0.211554	0.467812	0.648352	0.0121441
PCDHAC2	blue	-0.531217	0.0506142	-0.120099	0.682571	-0.326305	0.254868	0.297331	0.301895	-0.342324	0.230891	0.277751	0.336323	-0.3167	0.269936	0.701719	0.00515507	-0.766986	0.00136918	0.63948	0.0137953	-0.0543258	0.853659	-0.00961136	0.973986
PPARG	blue	-0.531002	0.0507252	-0.569613	0.0334737	-0.455971	0.101285	0.174938	0.549724	-0.0958961	0.744341	0.0685433	0.815896	0.21462	0.461234	0.589975	0.0263618	-0.499514	0.0689678	0.212971	0.464767	-0.0849934	0.772666	0.232926	0.422907
NIPSNAP1	blue	-0.530916	0.0507698	-0.565815	0.0349435	-0.526108	0.0532999	0.28023	0.331846	-0.1388	0.636053	0.199775	0.493501	0.122623	0.676225	0.494789	0.0720607	-0.405784	0.149991	0.348757	0.22167	-0.2381	0.412378	0.36727	0.196427
G6PD	blue	-0.530855	0.050801	0.179325	0.539597	-0.560689	0.0370022	0.604233	0.0221022	-0.74891	0.00205394	0.0919483	0.754565	-0.455691	0.101521	0.00956195	0.974119	-0.0781819	0.7905	0.199531	0.494039	-0.217126	0.45589	-0.468393	0.0911711
USP19	blue	-0.530854	0.0508018	-0.712449	0.00424644	-0.342167	0.231119	0.039203	0.894148	-0.158081	0.589368	0.241162	0.40621	0.288509	0.317145	0.8412	0.000162943	-0.787499	0.000826481	0.259689	0.369933	0.01984	0.946328	0.0626828	0.831422
ELP2	blue	-0.530777	0.0508417	-0.629389	0.0158762	-0.223533	0.442366	-0.0609157	0.836114	-0.0697871	0.812609	-0.0975525	0.740063	0.319757	0.265084	0.899664	1.18294e-05	-0.836821	0.000189918	0.0702746	0.811321	0.190979	0.513101	-0.00953359	0.974196
ST3GAL2	blue	-0.53053	0.0509694	-0.564011	0.0356581	-0.448124	0.108059	0.203122	0.486136	-0.426649	0.12817	0.32953	0.249924	0.173911	0.552105	0.574378	0.031695	-0.54759	0.0426682	0.167589	0.566867	-0.0520264	0.859796	-0.166109	0.570344
SOS2	blue	-0.530259	0.0511102	-0.255151	0.378652	-0.206057	0.479719	0.125264	0.669608	-0.160219	0.584277	0.0694268	0.813561	-0.143267	0.625116	0.879185	3.44386e-05	-0.909683	6.43479e-06	0.504072	0.0660745	0.0727211	0.804866	0.0621856	0.832742
TLN1	blue	-0.530154	0.0511647	-0.360487	0.205454	-0.519949	0.056673	0.356788	0.210484	-0.317593	0.268513	0.379026	0.181391	-0.114298	0.697225	0.506552	0.0645374	-0.505001	0.0654955	0.44915	0.107156	-0.0376607	0.898292	0.0905439	0.758211
BLOC1S5	blue	-0.529795	0.0513513	-0.222173	0.44522	-0.363799	0.201015	0.1247	0.67102	0.100296	0.732992	-0.66185	0.00992789	0.122312	0.677006	0.452787	0.103997	-0.362055	0.203345	-0.263475	0.362743	0.465793	0.093227	0.140023	0.633053
FZD9	blue	-0.529668	0.0514177	-0.664654	0.00950938	-0.467825	0.0916181	0.15881	0.587629	0.0193664	0.947607	0.0410269	0.88925	0.258457	0.372289	0.604698	0.0219728	-0.487407	0.0770886	0.235023	0.418623	-0.104366	0.722539	0.429217	0.125641
KNSTRN	blue	-0.529475	0.0515188	-0.0652829	0.824526	-0.462535	0.0958488	0.25844	0.372322	-0.260316	0.368737	-0.483807	0.0796284	-0.0135858	0.963234	0.243487	0.401559	-0.228033	0.432989	-0.420882	0.133973	0.626792	0.0164483	-0.40602	0.149731
METTL2B	blue	0.529474	0.051519	0.0629363	0.830749	0.654256	0.0111324	-0.515163	0.0593985	0.398301	0.158381	0.176235	0.546721	0.101626	0.729573	0.0546666	0.85275	-0.108567	0.711798	-0.00903795	0.975537	0.268535	0.353252	-0.111631	0.703994
PIK3C3	blue	-0.529019	0.0517573	-0.385403	0.173553	-0.200178	0.492611	0.0146871	0.960256	-0.0803422	0.784833	-0.11574	0.693572	0.0873747	0.766456	0.868431	5.60681e-05	-0.852634	0.000106812	0.272174	0.346512	0.0935133	0.750508	0.0652498	0.824614
EGR1	blue	-0.528844	0.0518491	-0.0548698	0.852208	-0.479348	0.0828553	0.53266	0.0498737	-0.523441	0.0547424	0.0918665	0.754777	-0.353481	0.215047	0.247454	0.393688	-0.243235	0.402063	0.442302	0.113281	-0.396329	0.160642	0.0660906	0.822386
NIT1	blue	-0.528798	0.0518734	-0.364012	0.200731	-0.590025	0.0263459	0.251474	0.385796	-0.0847803	0.773223	-0.503292	0.0665636	0.259491	0.370311	0.17682	0.545369	-0.0506898	0.863367	-0.460341	0.0976424	0.424595	0.130217	0.000132186	0.999642
CRISPLD2	blue	-0.528374	0.052096	-0.470026	0.0898964	-0.490405	0.0750178	0.31061	0.279759	-0.103911	0.723706	0.169638	0.562065	0.0074254	0.979901	0.5342	0.049092	-0.463127	0.0953684	0.439163	0.116167	-0.177349	0.544149	0.362939	0.202162
MAGEL2	blue	-0.528261	0.0521557	-0.607031	0.0213311	-0.314628	0.273255	0.0496108	0.866251	-0.224235	0.440898	0.274488	0.342264	0.192582	0.509503	0.859798	8.05053e-05	-0.838503	0.000179157	0.306072	0.287212	0.0729244	0.80433	-0.0194828	0.947293
TTC30A	blue	-0.527899	0.0523469	-0.659479	0.0102925	-0.290504	0.31366	-0.0354377	0.904269	0.0143924	0.961053	0.0164714	0.955432	0.313999	0.274267	0.869052	5.45751e-05	-0.803159	0.000541489	0.150893	0.606613	0.180817	0.536173	0.143997	0.623337
MOAP1	blue	-0.527802	0.0523982	0.0542946	0.853743	-0.360855	0.204957	0.335824	0.240447	-0.322198	0.261247	-0.507443	0.0639914	-0.152068	0.603779	0.208925	0.47349	-0.178606	0.541253	-0.0291008	0.921334	-0.191889	0.511057	-0.0367878	0.900638
ATG2B	blue	-0.527666	0.0524703	-0.206549	0.478648	-0.25998	0.369377	0.205955	0.479942	-0.386422	0.172321	0.217965	0.454107	-0.184508	0.527739	0.738061	0.0025799	-0.787807	0.000819905	0.468636	0.0909807	-0.0397309	0.89273	-0.14918	0.610749
MAGEE1	blue	-0.527014	0.0528165	0.039788	0.892576	-0.458505	0.0991615	0.487798	0.0768163	-0.704239	0.00492917	0.252691	0.383424	-0.37587	0.185353	0.294299	0.307088	-0.37121	0.191303	0.372424	0.18974	-0.209609	0.47201	-0.417749	0.137198
EDEM3	blue	-0.526411	0.0531377	-0.0733159	0.803298	-0.209757	0.47169	0.219303	0.451272	-0.258679	0.371864	0.0702209	0.811463	-0.315524	0.271817	0.78178	0.000956369	-0.843474	0.000150213	0.61676	0.0188072	-0.0692451	0.814041	0.0532816	0.856445
DAZAP2	blue	-0.526266	0.0532153	-0.0806925	0.783915	-0.306233	0.286947	0.187114	0.521823	-0.30563	0.287945	-0.458911	0.0988241	0.0306743	0.917094	0.384726	0.174374	-0.355115	0.212785	-0.0952512	0.746009	-0.0648756	0.825605	-0.0855385	0.771244
C5orf34	blue	-0.52625	0.0532237	0.0650224	0.825216	-0.468009	0.0914728	0.332116	0.246002	-0.150863	0.606684	-0.422441	0.132387	-0.204264	0.483633	0.28197	0.328727	-0.28913	0.316058	-0.130114	0.657517	0.586092	0.0276215	-0.11231	0.702269
DLG1	blue	0.526036	0.0533383	-0.436685	0.118481	0.753852	0.0018445	-0.784112	0.000901574	0.478789	0.0832666	0.60693	0.0213586	0.461448	0.0967345	0.530185	0.0511485	-0.565247	0.0351673	0.211857	0.46716	0.176156	0.546905	-0.0114381	0.969044
GNG12	blue	-0.525764	0.0534841	-0.446663	0.109353	-0.196995	0.499657	0.0150206	0.959354	-0.251576	0.385599	0.13523	0.644844	0.0976474	0.739818	0.926026	2.01414e-06	-0.936343	8.36728e-07	0.320958	0.263192	0.0867574	0.768065	-0.101651	0.729509
AL031282.2	blue	-0.525713	0.0535115	-0.11884	0.685742	-0.295858	0.304412	0.154529	0.597865	-0.153853	0.599486	-0.190308	0.51461	-0.100801	0.731694	0.634153	0.014866	-0.662577	0.00981804	0.153673	0.59992	0.320515	0.263888	0.0271798	0.926514
LCMT2	blue	-0.5257	0.0535189	-0.368293	0.195089	-0.40904	0.146435	0.212242	0.466332	-0.529884	0.0513051	-0.127738	0.663432	0.211238	0.468492	0.351957	0.217169	-0.298488	0.299927	-0.178564	0.541348	-0.140268	0.632452	-0.387777	0.170692
PCDH7	blue	-0.525582	0.053582	-0.704009	0.00494944	-0.414906	0.14017	0.0791024	0.788084	0.14676	0.616615	0.0139738	0.962185	0.278305	0.335319	0.74887	0.00205568	-0.633058	0.0150937	0.227586	0.433916	0.131993	0.652851	0.437178	0.118018
JRKL	blue	0.525142	0.0538189	-0.223009	0.443464	0.704602	0.00489731	-0.674426	0.00815669	0.361946	0.203491	0.382601	0.17697	0.331596	0.246788	0.296324	0.303615	-0.353854	0.214528	-0.0260869	0.929462	0.35741	0.209633	-0.28305	0.326798
ZNF783	blue	-0.524902	0.0539487	-0.626024	0.0166205	-0.410151	0.145234	0.118311	0.687075	0.034059	0.907979	0.0144159	0.960989	0.222799	0.443904	0.685809	0.00677416	-0.599786	0.0233708	0.204198	0.483779	0.119918	0.683025	0.331508	0.246922
FBN2	blue	-0.524593	0.0541155	-0.57794	0.0304121	-0.34589	0.225752	0.0664095	0.821542	0.0601225	0.838223	0.0968584	0.741855	0.152154	0.603572	0.865825	6.26978e-05	-0.809964	0.000445408	0.34491	0.227156	0.239055	0.410449	0.347567	0.223359
KYAT1	blue	-0.524517	0.054157	-0.0800642	0.785561	-0.618305	0.0184282	0.483324	0.0799739	-0.198718	0.495837	-0.402363	0.153789	-0.0975285	0.740125	-0.0308816	0.916535	0.12738	0.664324	-0.0477365	0.871265	-0.149734	0.609412	0.317256	0.26905
AC022150.4	blue	-0.524429	0.0542048	0.240973	0.40659	-0.33044	0.248539	0.342447	0.230713	-0.144143	0.62298	-0.234203	0.420296	-0.469062	0.0906478	0.516855	0.0584245	-0.587994	0.026999	0.395494	0.161605	0.299703	0.29787	0.0495565	0.866396
PRICKLE1	blue	-0.524051	0.0544096	-0.150791	0.606858	-0.298812	0.299378	0.219908	0.449992	0.0726295	0.805107	-0.0968861	0.741784	-0.224646	0.440036	0.704957	0.00486623	-0.702885	0.00504955	0.595066	0.0247762	-0.0540289	0.854451	0.508596	0.0632897
RCAN3	blue	-0.523215	0.0548655	-0.730931	0.00297979	-0.473705	0.0870693	0.127144	0.664911	-0.165219	0.572442	-0.00903979	0.975532	0.385615	0.173296	0.503299	0.0665591	-0.391692	0.166042	-0.108842	0.711096	0.0789535	0.788474	0.0178346	0.951747
PIK3CD	blue	-0.52314	0.0549065	-0.223363	0.442722	-0.356403	0.211013	0.1954	0.503206	-0.24698	0.394626	-0.354998	0.212946	0.01866	0.949516	0.456667	0.100699	-0.424595	0.130217	-0.196204	0.501416	0.436387	0.118761	-0.203728	0.484807
CNOT2	blue	-0.522849	0.0550663	-0.265536	0.35886	-0.316951	0.269535	0.0516003	0.860934	0.110964	0.705691	-0.535825	0.0482775	0.126945	0.66541	0.615478	0.0191262	-0.553779	0.0399171	-0.170358	0.56038	0.57051	0.0331332	0.0552941	0.851077
PRIM2	blue	-0.522115	0.0554694	-0.63062	0.0156102	-0.311504	0.278303	-0.0748338	0.799301	0.0618181	0.833717	-0.290161	0.314257	0.431434	0.123485	0.782677	0.000934982	-0.688554	0.00646988	-0.226838	0.43547	0.538115	0.0471456	-0.0373561	0.899111
TMEM63A	blue	-0.521823	0.0556309	-0.196514	0.500726	-0.446419	0.10957	0.401883	0.154327	-0.594613	0.0249143	0.250716	0.387278	-0.214446	0.461605	0.381947	0.177773	-0.410213	0.145167	0.282725	0.327377	-0.0899978	0.75963	-0.258259	0.37267
GATA6-AS1	blue	-0.521563	0.0557744	-0.101741	0.729278	-0.586744	0.027407	0.467932	0.0915333	-0.0708839	0.809712	-0.138704	0.636288	-0.171449	0.557836	0.176718	0.545606	-0.0985173	0.737575	0.325704	0.255795	-0.272055	0.346733	0.537286	0.0475531
SLC1A4	blue	-0.521528	0.0557939	-0.0832371	0.777255	-0.291084	0.31265	0.216522	0.457174	-0.15719	0.591495	-0.046998	0.873242	-0.207791	0.475948	0.645169	0.0127181	-0.672272	0.00844112	0.469981	0.0899315	-0.0560018	0.849191	0.195564	0.502841
HCG11	blue	-0.521473	0.0558241	-0.729229	0.00308216	-0.469028	0.0906743	0.113217	0.699967	-0.26374	0.362242	0.0230892	0.937552	0.403342	0.152696	0.475002	0.0860877	-0.376092	0.185071	-0.158971	0.587247	0.014314	0.961265	-0.148268	0.612959
FUT4	blue	-0.520592	0.056314	-0.564139	0.0356069	-0.295828	0.304463	0.0204783	0.944603	-0.206948	0.477779	-0.0205179	0.944496	0.275581	0.340267	0.781699	0.000958321	-0.727607	0.00318222	0.0475631	0.871729	0.176301	0.54657	-0.102253	0.727961
SMAD7	blue	-0.520555	0.0563346	-0.617207	0.0186969	-0.468091	0.0914086	0.130222	0.657248	0.224725	0.439873	-0.144849	0.621262	0.252038	0.384697	0.602856	0.0224894	-0.471118	0.0890504	0.136367	0.642039	0.163722	0.575973	0.569566	0.0334917
CCNF	blue	-0.520373	0.056436	-0.161888	0.580315	-0.327798	0.252572	0.225196	0.438889	-0.362351	0.202948	0.147558	0.61468	-0.174588	0.550536	0.62941	0.0158715	-0.695325	0.00576456	0.258571	0.372071	0.278579	0.334824	-0.292756	0.309751
C17orf53	blue	-0.520357	0.0564448	-0.366128	0.19793	-0.340343	0.233779	0.106263	0.717684	-0.0296665	0.91981	-0.0167246	0.954747	0.011539	0.96877	0.721337	0.00359335	-0.724915	0.00335389	0.174557	0.550607	0.442001	0.113555	0.0041109	0.988872
TMEM116	blue	-0.519941	0.0566771	-0.20594	0.479973	-0.601333	0.0229235	0.366915	0.196893	0.00356963	0.990337	-0.686129	0.00673807	0.105151	0.72053	-0.0378603	0.897755	0.185397	0.525718	-0.372094	0.190165	0.0796049	0.786766	0.272949	0.345087
TRPV4	blue	-0.519857	0.0567245	-0.751433	0.00194478	-0.2784	0.335147	-0.0802622	0.785042	-0.127526	0.663959	0.0437331	0.88199	0.426222	0.128594	0.878637	3.53432e-05	-0.811409	0.000426897	-0.0107398	0.970933	0.25005	0.388582	-0.127123	0.664966
NUF2	blue	-0.519676	0.0568256	-0.0495341	0.866456	-0.348191	0.222473	0.209069	0.473178	-0.202907	0.486606	-0.0956579	0.744957	-0.18523	0.526099	0.585914	0.0276804	-0.642135	0.0132843	0.122429	0.676714	0.521378	0.0558769	-0.212902	0.464914
TAF1A	blue	-0.519658	0.0568358	-0.511402	0.0616054	-0.406173	0.149563	0.0618652	0.833592	0.179423	0.539373	-0.28921	0.315917	0.281076	0.330328	0.63531	0.0146282	-0.537551	0.0474226	-0.099506	0.735027	0.492351	0.0736949	0.227479	0.434137
COA7	blue	-0.519373	0.0569962	-0.68164	0.0072575	-0.41811	0.136824	0.0457966	0.876459	0.00441008	0.988062	-0.111437	0.704487	0.363062	0.201998	0.644217	0.0128937	-0.541127	0.0456868	-0.139836	0.633511	0.387489	0.171038	0.00693061	0.98124
ZNF436-AS1	blue	0.519348	0.0570099	-0.21993	0.449946	0.516342	0.0587187	-0.448608	0.107632	0.564847	0.0353254	0.628702	0.0160259	0.155294	0.596031	0.167849	0.566255	-0.184794	0.52709	0.464071	0.0946062	-0.0537577	0.855175	0.442535	0.113069
AC009506.1	blue	-0.519339	0.0570155	-0.427896	0.126938	-0.481285	0.0814428	0.335613	0.24076	-0.103159	0.725636	0.213766	0.46306	-0.105662	0.719222	0.530438	0.0510173	-0.47648	0.0849788	0.506066	0.0648368	-0.115295	0.694697	0.452246	0.104463
CLSTN3	blue	-0.519254	0.057063	-0.743678	0.00229574	-0.341069	0.232717	-0.00405684	0.989018	-0.0699815	0.812095	0.208691	0.473996	0.33332	0.24419	0.866355	6.13004e-05	-0.803548	0.000535578	0.204906	0.48223	0.155733	0.594979	0.0900707	0.759441
MYBL1	blue	-0.51904	0.0571835	-0.282359	0.328031	-0.400518	0.155864	0.176624	0.545823	-0.12887	0.660612	-0.123975	0.672835	0.0372335	0.89944	0.501979	0.0673919	-0.494838	0.0720286	-0.019619	0.946925	0.394566	0.162681	-0.0623253	0.832371
SQLE	blue	0.51875	0.0573473	0.215705	0.458916	0.67075	0.0086468	-0.452547	0.104204	0.0589059	0.841458	0.512079	0.061204	-0.0622975	0.832445	0.097256	0.740829	-0.249053	0.390541	0.215322	0.459734	0.113618	0.698949	-0.392526	0.165062
PIK3IP1	blue	-0.518577	0.0574448	0.0978422	0.739316	-0.560101	0.0372438	0.548629	0.042197	-0.0939903	0.749272	-0.442475	0.113124	-0.324649	0.257428	-0.0198378	0.946334	0.095167	0.746227	0.264092	0.361577	-0.406491	0.149214	0.605268	0.0218145
RIPK1	blue	-0.518564	0.0574519	-0.126353	0.666886	-0.181474	0.534667	0.140273	0.63244	-0.283211	0.326511	0.0296215	0.919931	-0.195882	0.502131	0.80155	0.00056647	-0.867377	5.86761e-05	0.467977	0.0914977	0.002468	0.993319	-0.0994288	0.735226
TBL3	blue	-0.518117	0.0577052	-0.594323	0.0250028	-0.467548	0.0918363	0.18424	0.52835	-0.44565	0.110257	0.249446	0.389768	0.251303	0.386131	0.51283	0.0607605	-0.469257	0.0904953	0.00468685	0.987313	0.0349576	0.905561	-0.267451	0.355274
ZNF212	blue	-0.517967	0.0577905	-0.368059	0.195394	-0.574203	0.0317593	0.323089	0.259855	-0.0119336	0.967703	-0.255678	0.377634	0.0890984	0.761969	0.262327	0.364915	-0.144139	0.622991	-0.0260239	0.929632	0.153685	0.599889	0.451441	0.105159
MARCH3	blue	-0.517825	0.057871	-0.0730346	0.80404	-0.549627	0.0417479	0.574718	0.031571	-0.351914	0.21723	-0.031369	0.915222	-0.331351	0.247159	0.0895937	0.760681	-0.0467963	0.873782	0.425324	0.129488	-0.524543	0.054143	0.230808	0.427256
HELB	blue	-0.517473	0.0580712	-0.753167	0.00187246	-0.38306	0.176407	-0.00963142	0.973931	0.114066	0.697813	-0.205966	0.479918	0.434086	0.12094	0.694311	0.00586622	-0.557585	0.0382914	-0.15146	0.605245	0.359401	0.206923	0.171099	0.55865
NKAIN2	blue	-0.517407	0.0581092	-0.104847	0.721308	-0.351107	0.218359	0.265676	0.358598	-0.0194881	0.947278	0.0131215	0.96449	-0.244867	0.398813	0.659152	0.0103437	-0.662607	0.00981344	0.605876	0.021647	-0.0338607	0.908513	0.441706	0.113825
ZKSCAN7	blue	-0.517327	0.0581544	-0.739727	0.00249287	-0.33688	0.238877	-0.0291642	0.921163	0.0857519	0.770687	-0.0386998	0.895499	0.392784	0.16476	0.785989	0.000859306	-0.685775	0.00677798	0.0408048	0.889846	0.216763	0.456661	0.216259	0.457735
MGST1	blue	-0.517213	0.0582196	-0.649163	0.0120011	-0.397615	0.159165	0.0544874	0.853228	-0.0972906	0.740739	-0.00297968	0.991934	0.340366	0.233744	0.655586	0.0109138	-0.580898	0.0293764	-0.100347	0.732862	0.351952	0.217176	-0.134416	0.646854
KIAA0319L	blue	-0.516678	0.0585255	-0.0114037	0.969137	-0.328459	0.25156	0.383343	0.17606	-0.326137	0.255126	0.280759	0.330897	-0.470088	0.0898478	0.629618	0.0158264	-0.700117	0.00530282	0.801867	0.000561481	-0.21343	0.463782	0.176798	0.545421
ZC3HAV1	blue	-0.516211	0.0587939	0.408332	0.147203	-0.442037	0.113522	0.565259	0.0351624	-0.469955	0.0899513	-0.282115	0.328467	-0.615598	0.0190961	0.0543234	0.853666	-0.138272	0.63735	0.179244	0.539785	0.0642766	0.827193	-0.236197	0.416234
EFEMP2	blue	-0.51615	0.058829	-0.698945	0.00541295	-0.540481	0.045997	0.187884	0.52008	-0.214212	0.462105	-0.00844063	0.977154	0.372679	0.189414	0.383655	0.175678	-0.256605	0.375848	-0.200507	0.491886	0.13148	0.654123	0.00330158	0.991063
GJA1	blue	-0.515907	0.0589684	-0.579664	0.0298052	-0.36728	0.196415	0.0480347	0.870467	-0.280265	0.331784	-0.310771	0.279496	0.411523	0.14376	0.456238	0.10106	-0.357488	0.209527	-0.37477	0.186746	0.108876	0.711011	-0.315994	0.271063
FLII	blue	-0.515883	0.0589827	-0.347739	0.223114	-0.336891	0.238861	0.215126	0.460151	-0.519187	0.0571007	0.414818	0.140261	-0.068981	0.814739	0.672683	0.00838628	-0.723739	0.00343118	0.389676	0.168426	-0.0517997	0.860402	-0.328552	0.251417
RGS17	blue	-0.515828	0.0590139	-0.458086	0.0995106	-0.546502	0.043166	0.17296	0.554315	0.148533	0.612316	-0.563936	0.0356879	0.334542	0.242359	0.25807	0.373031	-0.095776	0.744652	-0.431471	0.12345	0.421585	0.133256	0.245912	0.396739
SLC38A9	blue	-0.515521	0.0591915	-0.700066	0.00530759	-0.255222	0.378516	-0.0515904	0.860961	-0.0610489	0.835761	-0.0507304	0.863258	0.373463	0.18841	0.855696	9.48274e-05	-0.772004	0.00121581	0.0401603	0.891577	0.18386	0.529217	0.0496806	0.866065
PRUNE1	blue	-0.51512	0.0594234	-0.592412	0.0255936	-0.223801	0.441805	-0.0716618	0.807659	0.0340552	0.90799	-0.0721582	0.80635	0.280397	0.331547	0.925093	2.16708e-06	-0.86997	5.24271e-05	0.142727	0.626436	0.269945	0.350632	0.154911	0.596948
ADAMTS12	blue	-0.514203	0.0599562	-0.737879	0.00258955	-0.379646	0.180618	0.0657139	0.823384	0.0214518	0.941974	0.0895613	0.760765	0.286117	0.321354	0.773838	0.00116329	-0.674017	0.00821012	0.185245	0.526063	0.176609	0.545858	0.252303	0.384179
RBM10	blue	-0.514082	0.060027	-0.527143	0.0527479	-0.451977	0.104695	0.235038	0.418593	-0.423919	0.130895	0.372292	0.189911	0.0976052	0.739927	0.550214	0.0414852	-0.535912	0.048234	0.231804	0.425209	-0.0431794	0.883474	-0.163725	0.575968
GPN3	blue	-0.514077	0.0600298	-0.471474	0.0887763	-0.496187	0.0711359	0.122588	0.676313	0.076611	0.794626	-0.548262	0.0423628	0.348558	0.221952	0.344217	0.228154	-0.205306	0.481358	-0.467511	0.0918653	0.537075	0.0476573	0.0120133	0.967488
KIFC1	blue	-0.514024	0.0600608	-0.0368422	0.900492	-0.327238	0.253431	0.259305	0.370668	-0.344999	0.22703	0.0855123	0.771312	-0.270083	0.350377	0.590157	0.026304	-0.67173	0.00851396	0.299252	0.298633	0.281843	0.328953	-0.296798	0.302805
NVL	blue	-0.513771	0.0602083	-0.572802	0.0322754	-0.320482	0.26394	0.00385218	0.989572	-0.0384382	0.896202	-0.0535817	0.855644	0.243328	0.401876	0.745007	0.00223229	-0.695351	0.00576199	-0.00456654	0.987639	0.355669	0.212022	-0.082385	0.779484
UBOX5	blue	-0.513589	0.0603148	-0.662443	0.00983825	-0.424241	0.130572	0.0704947	0.81074	0.017469	0.952735	-0.0787496	0.789009	0.367923	0.195572	0.621219	0.0177291	-0.509213	0.0629165	0.0160309	0.956622	0.115849	0.693295	0.247087	0.394413
C11orf96	blue	-0.513359	0.0604498	-0.296834	0.302743	-0.667152	0.00914828	0.432051	0.122891	-0.169332	0.562781	-0.00104185	0.99718	-0.0193591	0.947627	0.136527	0.641646	-0.0645128	0.826567	0.0328728	0.911172	0.115044	0.695333	0.201268	0.490208
NRDC	blue	-0.513166	0.060563	-0.471896	0.0884513	-0.225325	0.43862	0.000129953	0.999648	0.0303846	0.917874	0.0334805	0.909536	0.0858455	0.770443	0.93554	9.00459e-07	-0.927433	1.8006e-06	0.339892	0.234439	0.279362	0.33341	0.132223	0.652282
KIF18A	blue	-0.513156	0.0605686	-0.297821	0.301062	-0.339277	0.235341	0.127985	0.662814	0.131405	0.654311	-0.0472661	0.872524	-0.0640706	0.82774	0.769107	0.00130259	-0.762602	0.00151547	0.320409	0.264055	0.469183	0.0905526	0.248967	0.390709
TSPAN14	blue	0.513082	0.0606121	0.138235	0.637441	0.499033	0.0692779	-0.224355	0.440645	0.185446	0.525607	0.632004	0.0153153	-0.175727	0.547897	-0.137318	0.639697	0.0526587	0.858108	0.553688	0.0399564	-0.454649	0.102405	0.202192	0.488177
ZNF333	blue	-0.51272	0.0608255	-0.573259	0.0321064	-0.242172	0.404187	-0.0170314	0.953918	0.00662916	0.982056	0.0598124	0.839047	0.204513	0.483089	0.931295	1.30799e-06	-0.890459	1.96227e-05	0.330925	0.247804	0.119097	0.685093	0.198215	0.49695
TRIB1	blue	-0.512507	0.060951	-0.642566	0.0132026	-0.243408	0.401718	0.0118451	0.967942	-0.219911	0.449987	0.194141	0.506014	0.233897	0.420921	0.884816	2.61918e-05	-0.847013	0.000132011	0.275663	0.340117	-0.00458191	0.987597	-0.0433829	0.882929
MSH6	blue	-0.511828	0.0613522	-0.557215	0.0384473	-0.239794	0.40896	-0.0690162	0.814646	0.0298994	0.919182	-0.0353148	0.9046	0.234778	0.419122	0.932635	1.16567e-06	-0.90438	8.95528e-06	0.097981	0.738958	0.493928	0.0726349	-0.000737351	0.998004
GTPBP1	blue	-0.511656	0.0614544	-0.682447	0.00716196	-0.304222	0.290285	0.0315864	0.914637	-0.274977	0.34137	0.308294	0.283549	0.276781	0.338083	0.826062	0.000271787	-0.794249	0.000691748	0.239012	0.410535	-0.00263142	0.992877	-0.0908192	0.757496
FBXO38	blue	-0.511602	0.0614865	-0.319125	0.266083	-0.178638	0.541178	0.0367995	0.900607	-0.203367	0.485598	-0.048703	0.868679	0.0202044	0.945343	0.858841	8.36781e-05	-0.87028	5.1718e-05	0.24423	0.400079	0.19172	0.511437	-0.149234	0.610619
POLE2	blue	-0.511492	0.0615515	-0.075125	0.798534	-0.327302	0.253333	0.166244	0.570028	-0.222641	0.444237	-0.0852455	0.772008	-0.121987	0.677824	0.610094	0.0205107	-0.662686	0.00980161	0.0827571	0.77851	0.509546	0.0627157	-0.302725	0.292786
RGP1	blue	-0.511216	0.0617162	0.0388607	0.895067	-0.29826	0.300314	0.34537	0.226497	-0.382773	0.176758	0.23436	0.419974	-0.414557	0.140537	0.561693	0.0365922	-0.649668	0.0119128	0.713591	0.00415773	-0.349777	0.220229	0.0375625	0.898556
TRAIP	blue	-0.511058	0.0618103	-0.135429	0.644354	-0.441665	0.113863	0.25137	0.386001	-0.203461	0.485392	-0.121604	0.678784	-0.0969584	0.741597	0.417465	0.137493	-0.432497	0.122461	-0.0487526	0.868547	0.519419	0.0569701	-0.205852	0.480166
SNX16	blue	0.510973	0.0618608	-0.35173	0.217488	0.679863	0.00747142	-0.786871	0.000840014	0.516891	0.0584034	-0.0469011	0.873501	0.656921	0.0106976	0.177147	0.544615	-0.130795	0.655825	-0.496462	0.070955	0.419619	0.135267	-0.14707	0.615863
ZFC3H1	blue	0.510861	0.0619272	0.174847	0.549934	0.5768	0.0308183	-0.34911	0.221172	0.340268	0.233888	0.608584	0.0209121	-0.17838	0.541772	0.116488	0.691679	-0.224717	0.439889	0.579816	0.0297522	-0.051723	0.860607	0.202005	0.488588
HAND1	blue	-0.510691	0.062029	-0.612554	0.0198688	-0.444387	0.111392	0.122375	0.676849	0.184725	0.527246	-0.124948	0.6704	0.246283	0.396004	0.573936	0.0318569	-0.452908	0.103894	0.116188	0.692439	0.114334	0.697132	0.475984	0.0853496
SPC24	blue	-0.509996	0.062445	0.258635	0.371948	-0.431504	0.123418	0.424324	0.130489	-0.358696	0.20788	-0.164529	0.574068	-0.454806	0.102272	0.257071	0.374949	-0.344054	0.22839	0.136654	0.641333	0.371582	0.190823	-0.276954	0.337768
PRICKLE2	blue	-0.509887	0.0625109	0.0939536	0.749367	-0.304965	0.289049	0.347571	0.223352	-0.0205286	0.944467	-0.0708055	0.809919	-0.465793	0.0932269	0.591759	0.0257978	-0.623784	0.0171306	0.74033	0.00246197	-0.149352	0.610334	0.510276	0.0622775
SEPSECS	blue	-0.50987	0.0625208	-0.314938	0.272757	-0.266721	0.356639	0.100602	0.732207	-0.0489609	0.867989	-0.3388	0.236042	0.0968164	0.741964	0.593986	0.0251064	-0.525569	0.0535892	0.0666259	0.820969	0.00930896	0.974804	0.134501	0.646643
CDC20	blue	-0.509858	0.0625279	-0.292493	0.310206	-0.369017	0.194145	0.18553	0.525417	-0.368533	0.194775	0.133381	0.649415	-0.0119971	0.967531	0.578581	0.0301852	-0.61465	0.0193343	0.0759863	0.796269	0.336716	0.23912	-0.380246	0.179873
KDM6A	blue	-0.50975	0.0625933	-0.66881	0.00891438	-0.212632	0.465493	-0.0959536	0.744193	-0.0258961	0.929977	-0.00932352	0.974765	0.346722	0.224562	0.931466	1.28908e-06	-0.874208	4.33879e-05	0.124533	0.671438	0.177143	0.544624	0.0356977	0.90357
SEMA3C	blue	-0.509623	0.0626695	0.325931	0.255444	-0.365999	0.198099	0.59137	0.0259201	-0.465572	0.0934034	0.0532538	0.856519	-0.70387	0.00496177	0.297367	0.301835	-0.372935	0.189086	0.799611	0.000597801	-0.506592	0.0645128	0.228548	0.431922
C7orf31	blue	-0.508976	0.06306	-0.485533	0.0784035	-0.323921	0.258559	0.0543282	0.853653	-0.124303	0.672013	0.132163	0.65243	0.119678	0.68363	0.773509	0.00117257	-0.767392	0.00135622	0.234628	0.419428	0.213044	0.464609	-0.0221825	0.94
CEBPD	blue	-0.508635	0.0632663	-0.737329	0.00261888	-0.470953	0.0891779	0.114346	0.697102	-0.119956	0.68293	0.153484	0.600373	0.361998	0.203421	0.599875	0.0233449	-0.49302	0.0732444	0.0645121	0.826569	0.0588799	0.841527	0.117383	0.689418
PTK7	blue	-0.508091	0.0635961	-0.495066	0.0718767	-0.252704	0.383398	0.0921492	0.754044	-0.328681	0.25122	0.378793	0.181681	0.0527561	0.857848	0.872329	4.72231e-05	-0.888015	2.22782e-05	0.480261	0.0821877	-0.0808587	0.78348	-0.0469511	0.873368
PCCB	blue	-0.507713	0.0638265	-0.506492	0.064574	-0.31297	0.275927	0.0438608	0.881647	-0.329208	0.250415	-0.191489	0.511954	0.326813	0.254084	0.537443	0.0474758	-0.479193	0.0829694	-0.297182	0.302151	0.218796	0.452346	-0.427495	0.127333
PLBD2	blue	0.5071	0.0642014	-0.198598	0.496102	0.659277	0.0103241	-0.508034	0.063631	0.0656957	0.823432	0.901861	1.04091e-05	0.142382	0.627279	0.293744	0.308044	-0.39114	0.166693	0.494322	0.0723723	-0.289012	0.316264	-0.137178	0.640043
CACNA2D1	blue	-0.50653	0.0645505	0.476999	0.0845922	-0.298054	0.300665	0.509759	0.0625874	-0.574787	0.0315458	-0.117718	0.688572	-0.698922	0.00541517	0.286515	0.320653	-0.410296	0.145078	0.479061	0.0830663	-0.13825	0.637404	-0.240799	0.406939
GNAQ	blue	0.506026	0.0648612	0.312756	0.276273	0.632385	0.0152349	-0.419691	0.135193	0.28494	0.323438	0.0575047	0.845188	-0.0542143	0.853956	-0.082326	0.779638	-0.0150543	0.959263	-0.0605127	0.837186	0.291327	0.312228	-0.221625	0.446372
CTPS1	blue	-0.505866	0.0649598	0.0545878	0.85296	-0.243399	0.401735	0.241976	0.404579	-0.334526	0.242383	-0.0462851	0.875151	-0.340473	0.233589	0.620266	0.0179554	-0.708423	0.0045713	0.341913	0.23149	0.221716	0.44618	-0.230226	0.428456
SPG11	blue	-0.505788	0.0650083	-0.568262	0.033991	-0.185754	0.524908	-0.0812904	0.782349	-0.0447318	0.879312	0.038094	0.897127	0.236102	0.416426	0.969957	9.94978e-09	-0.947941	2.56747e-07	0.224093	0.441194	0.223725	0.441963	0.00219233	0.994065
MCM4	blue	-0.505512	0.065179	-0.0977444	0.739568	-0.275552	0.34032	0.178617	0.541226	-0.214526	0.461435	0.0706938	0.810214	-0.217437	0.455227	0.719883	0.00369438	-0.790788	0.00075844	0.34551	0.226295	0.358998	0.207469	-0.149762	0.609344
ZNF710	blue	-0.505002	0.0654948	-0.660093	0.0101972	-0.317198	0.269142	0.0636892	0.828751	-0.395672	0.1614	0.297604	0.301431	0.261501	0.366481	0.726439	0.00325583	-0.702812	0.00505613	0.141368	0.629758	-0.0268461	0.927414	-0.311983	0.277526
MMP14	blue	-0.504969	0.0655153	-0.0230111	0.937763	-0.632137	0.0152872	0.636253	0.0144366	-0.338906	0.235887	0.070746	0.810076	-0.375748	0.185506	0.0304766	0.917627	0.0127055	0.965615	0.499569	0.0689322	-0.517168	0.0582454	0.379955	0.180235
PHF12	blue	-0.504958	0.0655224	-0.520059	0.0566114	-0.523621	0.0546441	0.250122	0.388441	0.109328	0.709856	0.0560816	0.848978	0.101292	0.730432	0.492569	0.0735476	-0.392172	0.165477	0.342253	0.230995	-0.0626017	0.831637	0.560896	0.0369172
ARID2	blue	-0.504906	0.0655547	-0.51833	0.0575847	-0.248994	0.390656	0.00469312	0.987296	0.147978	0.613659	-0.210498	0.470088	0.181548	0.534498	0.821648	0.000312697	-0.744142	0.00227342	0.189673	0.51604	0.218932	0.452057	0.365966	0.198143
LMNB1	blue	-0.504773	0.0656373	-0.429449	0.125415	-0.359954	0.206174	0.0871889	0.76694	-0.163403	0.576728	0.0616801	0.834084	0.114005	0.697968	0.682943	0.00710366	-0.684093	0.00696999	0.0283705	0.923303	0.489577	0.075586	-0.225271	0.438733
MPPED2	blue	-0.504701	0.0656824	-0.270379	0.349828	-0.46422	0.0944865	0.185769	0.524873	0.200752	0.491345	-0.6144	0.0193975	0.162672	0.578459	0.296896	0.302638	-0.171398	0.557953	-0.184475	0.527815	0.227782	0.433508	0.48788	0.0767597
NCAPG	blue	-0.504257	0.0659592	-0.0618221	0.833707	-0.28798	0.318073	0.179199	0.539888	-0.223709	0.441997	-0.0512429	0.861889	-0.195946	0.501989	0.638761	0.0139362	-0.706602	0.00472442	0.194474	0.50527	0.434461	0.120583	-0.257982	0.373201
FBXO34	blue	-0.504131	0.0660377	-0.0195736	0.947047	-0.237767	0.413052	0.177121	0.544674	-0.196518	0.500717	-0.0357807	0.903347	-0.241602	0.405327	0.719345	0.00373233	-0.78274	0.000933504	0.392736	0.164816	0.231243	0.42636	-0.102579	0.727123
SORL1	blue	-0.50413	0.0660382	-0.651293	0.0116318	-0.408182	0.147366	0.0807085	0.783873	0.2356	0.417448	-0.0676448	0.818272	0.251354	0.386031	0.693722	0.00592582	-0.57711	0.0307075	0.23138	0.426079	0.129952	0.657919	0.558912	0.037736
TRIB2	blue	0.503891	0.0661875	-0.599124	0.0235641	0.61571	0.0190682	-0.722848	0.00349068	0.4541	0.102873	0.68574	0.00678195	0.598609	0.0237155	0.420891	0.133963	-0.403357	0.152679	0.194023	0.506277	-0.0380512	0.897242	0.11215	0.702677
KIF18B	blue	-0.503783	0.0662551	-0.0635127	0.829219	-0.350653	0.218997	0.271283	0.348156	-0.232077	0.424648	0.155504	0.595526	-0.29368	0.308155	0.618526	0.0183744	-0.691355	0.0061704	0.430439	0.12445	0.271603	0.347564	-0.077345	0.792697
ABCA6	blue	0.503374	0.0665117	0.131925	0.653019	0.543178	0.0447127	-0.264011	0.361732	0.0984534	0.737739	0.539777	0.0463366	-0.135116	0.645126	-0.137785	0.638548	0.0608904	0.836182	0.452681	0.104089	-0.527929	0.0523308	0.0605584	0.837064
DKK1	blue	-0.503277	0.0665727	-0.736116	0.00268448	-0.355891	0.211716	-0.0328833	0.911144	0.205213	0.48156	-0.0767961	0.79414	0.389017	0.169211	0.813805	0.000397565	-0.698849	0.00542211	0.0737988	0.802026	0.33705	0.238626	0.347181	0.223909
ACAD10	blue	-0.503178	0.0666351	-0.703848	0.00496374	-0.339109	0.235588	0.0808181	0.783586	-0.171487	0.557745	0.163007	0.577666	0.28129	0.329944	0.69097	0.00621095	-0.605861	0.0216511	0.241725	0.405082	-0.219221	0.451445	0.153982	0.599178
POLR2D	blue	-0.503047	0.0667175	0.121821	0.678241	-0.46702	0.0922529	0.376411	0.184669	0.0217859	0.941071	-0.35016	0.219691	-0.363683	0.201169	0.290165	0.31425	-0.299217	0.298692	0.171549	0.5576	0.390773	0.167125	0.179077	0.540169
AC093512.2	blue	-0.503012	0.0667392	-0.349714	0.220318	-0.497016	0.0705912	0.353468	0.215064	-0.276455	0.338675	0.140517	0.63184	-0.0714276	0.808277	0.364367	0.20026	-0.32678	0.254135	0.233491	0.42175	-0.0343951	0.907075	0.033455	0.909605
ARL4D	blue	-0.503009	0.0667414	-0.770073	0.00127311	-0.455832	0.101403	0.0427207	0.884705	-0.0427128	0.884726	-0.104617	0.721896	0.49648	0.0709429	0.534571	0.0489054	-0.393875	0.163485	-0.20913	0.473044	0.175492	0.54844	0.131854	0.653196
PIGO	blue	-0.502887	0.0668185	-0.66944	0.00882677	-0.253724	0.381418	-0.0091827	0.975146	-0.205262	0.481453	0.234327	0.420042	0.262344	0.364883	0.901542	1.06062e-05	-0.868746	5.53058e-05	0.224816	0.439682	0.143909	0.623551	-0.0758518	0.796622
ZKSCAN4	blue	-0.501933	0.0674213	-0.531244	0.0506003	-0.311637	0.278087	-0.0410695	0.889135	0.107742	0.713903	-0.296014	0.304146	0.33595	0.240258	0.698411	0.00546377	-0.61135	0.0201811	-0.161656	0.580865	0.468085	0.0914134	0.0789548	0.788471
SCAMP1	blue	-0.501757	0.067533	-0.466149	0.0929435	-0.165454	0.571887	-0.0326674	0.911726	-0.138817	0.636011	0.00457659	0.987611	0.163402	0.57673	0.89398	1.62577e-05	-0.879765	3.35017e-05	0.2544	0.380106	0.0582302	0.843256	-0.022426	0.939343
ABCD1	blue	-0.5017	0.0675689	-0.404964	0.150897	-0.516747	0.058486	0.325429	0.25622	0.0873291	0.766575	-0.042663	0.884859	-0.0176737	0.952182	0.377263	0.183596	-0.274432	0.342367	0.399408	0.157121	-0.254523	0.379868	0.659078	0.0103553
ITPRIP	blue	-0.501566	0.0676542	-0.444225	0.111537	-0.203399	0.485528	0.0909982	0.757031	-0.314079	0.274137	0.288547	0.317079	0.0130422	0.964704	0.863034	7.04966e-05	-0.879123	3.45403e-05	0.525831	0.0534485	-0.215904	0.458492	-0.0156803	0.95757
AC007744.1	blue	-0.501397	0.0677618	0.24219	0.404151	-0.262986	0.363667	0.254053	0.380779	-0.0587006	0.842004	-0.477285	0.0843788	-0.368572	0.194724	0.457798	0.099751	-0.506631	0.0644888	0.221719	0.446175	0.239679	0.409192	0.0553827	0.850841
NAP1L3	blue	-0.500835	0.0681202	-0.403941	0.15203	-0.218407	0.453169	-0.0547517	0.852523	-0.192736	0.509158	-0.238665	0.411236	0.262126	0.365297	0.737939	0.00258635	-0.720143	0.00367616	-0.219938	0.44993	0.50919	0.0629302	-0.335877	0.240368
FBXO30	blue	-0.500758	0.0681695	-0.534813	0.0487838	-0.165083	0.572761	-0.0601824	0.838063	-0.222464	0.444608	0.0398092	0.892519	0.223505	0.442424	0.915338	4.42082e-06	-0.907874	7.21894e-06	0.113795	0.698499	0.242219	0.404092	-0.22126	0.447141
PLBD1	blue	-0.500625	0.0682543	-0.260445	0.368492	-0.555613	0.0391277	0.238845	0.410872	0.114488	0.696743	-0.602434	0.0226089	0.182977	0.531231	0.16105	0.582303	-0.0372356	0.899435	-0.40891	0.146576	0.463662	0.0949363	0.193374	0.50773
PIM1	blue	-0.500278	0.0684764	-0.249376	0.389906	-0.364776	0.199716	0.197612	0.498287	0.0426871	0.884795	-0.292339	0.310472	-0.041084	0.889096	0.551559	0.0408886	-0.497647	0.0701787	0.126566	0.666356	0.342388	0.230799	0.341591	0.231958
IGF2-AS	blue	-0.500256	0.0684909	-0.556727	0.0386537	-0.435248	0.119837	0.168614	0.564462	0.126726	0.665955	0.0598672	0.838902	0.132257	0.652197	0.625027	0.016846	-0.528039	0.0522732	0.384495	0.174655	-0.076992	0.793625	0.545182	0.0437751
ATAD2	blue	-0.499775	0.0687995	0.118221	0.687302	-0.262479	0.364626	0.242282	0.403966	-0.122022	0.677734	-0.164962	0.573047	-0.369284	0.193798	0.615386	0.0191491	-0.68825	0.00650298	0.353444	0.215098	0.371507	0.19092	-0.0290635	0.921435
NBPF3	blue	-0.499771	0.0688024	0.0353387	0.904536	-0.266156	0.357698	0.355452	0.21232	-0.272296	0.346287	0.0889484	0.762359	-0.45946	0.0983698	0.565811	0.0349449	-0.617327	0.0186674	0.694175	0.00587993	-0.254391	0.380123	0.247796	0.393015
ETS1	blue	0.499563	0.0689359	-0.301075	0.295554	0.717164	0.00388934	-0.693368	0.00596195	0.0746363	0.799821	0.524491	0.0541711	0.438636	0.116657	0.308248	0.283623	-0.378742	0.181745	-0.103985	0.723517	0.169676	0.561975	-0.529957	0.0512674
SETDB1	blue	-0.499428	0.0690234	-0.65419	0.0111434	-0.332657	0.245188	-0.0298936	0.919198	0.112977	0.700574	-0.0995987	0.734788	0.344103	0.228318	0.767843	0.00134194	-0.687514	0.0065839	0.0301622	0.918474	0.310615	0.279751	0.162975	0.577742
IKZF5	blue	-0.499309	0.0690999	-0.29941	0.298366	-0.203041	0.486312	0.0377703	0.897997	-0.0706841	0.81024	-0.0203111	0.945055	-0.0188761	0.948932	0.859018	8.30843e-05	-0.877723	3.68938e-05	0.255435	0.378105	0.399771	0.156709	-0.0187033	0.949399
NPR3	blue	-0.49925	0.0691379	-0.634683	0.0147567	-0.317818	0.268154	-0.0218701	0.940844	0.211461	0.468012	-0.0695245	0.813302	0.280105	0.332071	0.825572	0.000276104	-0.739172	0.00252159	0.203277	0.485795	0.237977	0.412626	0.39273	0.164823
E2F2	blue	-0.49905	0.0692674	0.315328	0.272131	-0.407955	0.147613	0.432765	0.122204	-0.313282	0.275424	-0.0422324	0.886015	-0.532492	0.0499595	0.335878	0.240365	-0.437848	0.117391	0.389529	0.1686	0.226882	0.435378	-0.0559458	0.84934
CTBP2	blue	-0.498876	0.0693798	-0.735228	0.00273339	-0.500685	0.0682162	0.0855929	0.771102	0.0833801	0.776881	-0.105605	0.719368	0.428216	0.126623	0.511022	0.0618316	-0.366609	0.197296	-0.139787	0.633632	0.261839	0.36584	0.286978	0.319836
INTS1	blue	-0.498843	0.0694012	-0.554039	0.0398043	-0.32254	0.260712	0.12838	0.661832	-0.362387	0.2029	0.449547	0.106808	0.0901446	0.759249	0.770748	0.00125283	-0.77554	0.00111618	0.402126	0.154055	-0.0557361	0.849899	-0.0945697	0.747772
EML3	blue	-0.498484	0.069634	-0.495159	0.0718155	-0.506289	0.0646993	0.200842	0.491147	0.0992169	0.735772	-0.260947	0.367536	0.234205	0.420291	0.355935	0.211655	-0.214613	0.461249	-0.000248111	0.999328	-0.0183762	0.950283	0.519452	0.0569515
GPRC5C	blue	-0.498178	0.0698328	-0.757812	0.00168922	-0.451628	0.104996	0.0352684	0.904725	-0.00243836	0.993399	-0.0725522	0.805311	0.489425	0.0756907	0.572033	0.0325612	-0.436843	0.118332	-0.166596	0.569199	0.229601	0.429744	0.151995	0.603955
ANLN	blue	-0.497571	0.0702281	-0.079223	0.787767	-0.213949	0.462669	0.167802	0.566366	-0.282625	0.327555	0.109261	0.710028	-0.248524	0.39158	0.754146	0.00183259	-0.839743	0.000171545	0.429997	0.12488	0.204778	0.48251	-0.198914	0.495404
PITPNB	blue	0.4974	0.07034	-0.312256	0.277082	0.762128	0.00153199	-0.802202	0.000556242	0.343233	0.229575	0.392987	0.164522	0.480343	0.0821276	0.468996	0.0906993	-0.530753	0.0508542	-0.0722061	0.806224	0.375521	0.185793	-0.330169	0.248952
AL162377.1	blue	-0.497384	0.0703504	0.0750355	0.79877	-0.399012	0.157571	0.223959	0.441474	0.167111	0.567988	-0.696757	0.00562345	-0.113737	0.698646	0.274789	0.341712	-0.23573	0.417183	-0.108648	0.711592	0.369432	0.193605	0.31451	0.273444
HPRT1	blue	-0.497146	0.0705059	-0.401702	0.154531	-0.413797	0.141339	0.0633697	0.829599	-0.310178	0.280462	-0.29072	0.313283	0.347229	0.22384	0.369863	0.193045	-0.324883	0.257066	-0.521535	0.0557902	0.479036	0.0830847	-0.504886	0.0655671
CKAP2L	blue	-0.497092	0.0705409	0.00622919	0.983138	-0.318594	0.266924	0.234013	0.420683	-0.216561	0.457092	-0.0592225	0.840616	-0.265134	0.359615	0.569746	0.033423	-0.636289	0.0144292	0.221059	0.447564	0.424132	0.130681	-0.227439	0.434221
ADA2	blue	-0.496751	0.0707647	0.220028	0.44974	-0.372158	0.190082	0.333675	0.243657	-0.536652	0.0478663	-0.359361	0.206977	-0.22104	0.447604	0.136081	0.642745	-0.197656	0.49819	-0.235687	0.417271	0.233544	0.421642	-0.631316	0.0154615
FAM107B	blue	-0.496648	0.0708326	-0.589494	0.0265156	-0.267878	0.354477	-0.0358544	0.903149	0.0175104	0.952623	-0.0694355	0.813538	0.273676	0.343752	0.83835	0.000180118	-0.783128	0.000924373	0.0829657	0.777965	0.319828	0.264972	-0.0327642	0.911465
DIXDC1	blue	-0.496551	0.0708961	-0.637629	0.0141605	-0.386718	0.171964	0.07445	0.800311	0.24817	0.392277	-0.14451	0.622086	0.242972	0.402587	0.695815	0.00571593	-0.568232	0.0340025	0.165287	0.572281	0.235287	0.418085	0.527313	0.0526572
TFPI	blue	-0.496476	0.0709456	-0.758001	0.00168206	-0.261187	0.367079	-0.112979	0.70057	0.0687814	0.815266	-0.0190538	0.948452	0.430762	0.124137	0.902307	1.01386e-05	-0.816405	0.000367601	0.0518291	0.860323	0.27727	0.337194	0.115184	0.694978
DLGAP5	blue	-0.496088	0.0712008	-0.0865715	0.768549	-0.285253	0.322882	0.201404	0.489908	-0.221057	0.447569	0.0771409	0.793233	-0.243784	0.400967	0.670818	0.00863746	-0.743164	0.00232067	0.347977	0.222776	0.333203	0.244366	-0.162151	0.579693
CYP2U1	blue	-0.495691	0.0714631	-0.354612	0.213479	-0.163819	0.575746	0.00712494	0.980714	-0.0608027	0.836415	-0.17212	0.556271	0.0715171	0.808041	0.816977	0.000361253	-0.796056	0.000658858	0.194967	0.504172	0.169751	0.561799	0.10748	0.714572
PDE4DIP	blue	-0.495377	0.0716705	-0.0701188	0.811732	-0.288652	0.316896	0.288515	0.317135	-0.0755592	0.797392	0.12467	0.671094	-0.350407	0.219342	0.695637	0.00573364	-0.72501	0.00334772	0.706302	0.00475005	-0.032347	0.912588	0.356991	0.210206
SLC22A5	blue	-0.495316	0.0717114	-0.414485	0.140613	-0.4569	0.100503	0.237778	0.413028	0.253737	0.381392	-0.0441432	0.88089	-0.0172263	0.953391	0.557445	0.0383503	-0.468152	0.0913607	0.448935	0.107344	0.0112444	0.969567	0.727675	0.00317797
ERO1B	blue	-0.495295	0.0717252	-0.476611	0.0848812	-0.274087	0.342997	0.0213321	0.942297	0.0828212	0.778343	0.0107714	0.970847	0.124204	0.672263	0.86473	6.56685e-05	-0.82281	0.000301471	0.347986	0.222763	0.195902	0.502088	0.296776	0.302842
GPC3	blue	-0.494718	0.072108	-0.577381	0.030611	-0.458333	0.099305	0.211299	0.468361	-0.0197798	0.94649	0.146453	0.617361	0.146295	0.617744	0.554071	0.0397908	-0.46019	0.0977673	0.369564	0.193433	-0.196403	0.500973	0.426801	0.12802
CDK2	blue	-0.494635	0.0721634	-0.391903	0.165793	-0.393198	0.164276	0.0596331	0.839524	0.210458	0.470175	-0.216724	0.456745	0.171589	0.557508	0.666046	0.00930682	-0.600808	0.0230746	0.00700525	0.981038	0.612371	0.019916	0.300504	0.296517
LRTOMT	blue	-0.494566	0.0722094	-0.298811	0.29938	-0.420446	0.134419	0.260305	0.368758	-0.0892899	0.761471	-0.280739	0.330933	0.0618892	0.833529	0.396662	0.160259	-0.299033	0.299003	0.0414048	0.888235	0.0766356	0.794561	0.238478	0.411613
DTL	blue	-0.494563	0.0722111	-0.176967	0.54503	-0.261161	0.367128	0.0987366	0.737009	-0.0114571	0.968992	-0.100262	0.733082	-0.100988	0.731212	0.748691	0.00206364	-0.78063	0.000984351	0.212954	0.464803	0.531826	0.0503009	-0.00596931	0.983842
TTC8	blue	-0.494551	0.0722197	0.0770422	0.793493	-0.18657	0.523056	0.182736	0.531782	-0.329789	0.24953	-0.0428158	0.88445	-0.270934	0.348802	0.674711	0.0081195	-0.760061	0.00160578	0.382486	0.17711	0.0737308	0.802205	-0.223642	0.442138
PGBD2	blue	-0.494249	0.072421	-0.594476	0.0249559	-0.3547	0.213358	0.0513856	0.861508	0.0584208	0.842749	0.0479202	0.870774	0.213438	0.463764	0.758957	0.00164629	-0.688495	0.00647625	0.225295	0.438683	0.225967	0.437281	0.349048	0.221259
SCGB1A1	blue	-0.494207	0.0724484	-0.196451	0.500867	-0.612332	0.0199263	0.403407	0.152624	0.10207	0.728431	-0.163373	0.576799	-0.0838839	0.775564	0.162808	0.578136	-0.0727642	0.804752	0.238245	0.412083	-0.0891017	0.76196	0.603276	0.0223708
VPS39	blue	-0.494053	0.0725514	-0.383639	0.175698	-0.151114	0.606079	0.0465117	0.874544	-0.261834	0.36585	0.171806	0.557002	-0.00611002	0.983461	0.885337	2.55184e-05	-0.911326	5.78468e-06	0.411131	0.14418	0.000348381	0.999057	-0.0888937	0.762501
STRN	blue	0.493894	0.0726581	-0.30214	0.293765	0.683831	0.0070003	-0.738229	0.00257104	0.425674	0.129138	0.00315609	0.991457	0.557987	0.0381226	0.200018	0.492964	-0.180983	0.535793	-0.428006	0.12683	0.432197	0.12275	-0.267362	0.35544
H2AFY2	blue	-0.493702	0.0727863	-0.758519	0.00166262	-0.469023	0.0906782	0.0219179	0.940715	0.106196	0.717856	-0.253776	0.381316	0.513522	0.0603544	0.508801	0.0631657	-0.354498	0.213636	-0.329555	0.249887	0.404677	0.151213	0.165083	0.572761
GSTM2	blue	-0.493477	0.0729373	-0.751686	0.00193408	-0.488179	0.0765517	0.0896801	0.760456	0.0260064	0.929679	-0.072354	0.805834	0.444253	0.111512	0.508777	0.0631801	-0.361542	0.204033	-0.140567	0.631718	0.209994	0.471177	0.220254	0.449262
CRHBP	blue	-0.492759	0.0734195	-0.40926	0.146197	-0.355172	0.212707	0.172359	0.555715	0.115828	0.69335	0.0392512	0.894018	-0.0416351	0.887618	0.698058	0.00549755	-0.653843	0.0112011	0.438682	0.116614	0.134438	0.646799	0.447016	0.109039
TPX2	blue	-0.492006	0.0739284	-0.143313	0.625004	-0.311253	0.278712	0.185858	0.524671	-0.171071	0.558715	0.0622451	0.832584	-0.183558	0.529905	0.653822	0.0112045	-0.710591	0.00439404	0.279358	0.333416	0.404725	0.151161	-0.144421	0.622303
NIPBL-DT	blue	-0.491836	0.0740432	-0.48927	0.0757974	-0.235504	0.417644	0.0132621	0.964109	-0.112291	0.702317	-0.052023	0.859805	0.162159	0.579673	0.778993	0.00102532	-0.752502	0.00189992	0.0503859	0.864179	0.367359	0.196311	-0.110914	0.705819
VCL	blue	-0.490855	0.0747103	0.0877663	0.765436	-0.207903	0.475704	0.315732	0.271484	-0.417074	0.137899	0.19135	0.512267	-0.471709	0.0885953	0.643588	0.0130107	-0.74857	0.00206898	0.721341	0.00359307	-0.233473	0.421786	-0.0446469	0.87954
EZH1	blue	-0.490837	0.0747227	0.0770878	0.793373	-0.293205	0.308975	0.3225	0.260774	-0.073732	0.802202	-0.230065	0.428788	-0.381983	0.177729	0.489157	0.075875	-0.494562	0.0722119	0.502121	0.0673024	-0.105186	0.720439	0.426345	0.128472
PSMD1	blue	-0.490689	0.0748238	0.0773178	0.792769	-0.219812	0.450196	0.225048	0.439199	-0.485896	0.0781481	-0.22103	0.447625	-0.249275	0.390103	0.459408	0.098413	-0.537741	0.047329	0.0623037	0.832428	0.149398	0.610222	-0.508637	0.0632647
EVC2	blue	-0.490668	0.0748385	-0.677763	0.00773058	-0.383465	0.175911	0.0348861	0.905753	-0.0562146	0.848624	-0.045848	0.876322	0.352752	0.216061	0.62027	0.0179546	-0.532051	0.0501854	-0.163698	0.576032	0.41702	0.137956	-0.0682959	0.81655
PDE3A	blue	-0.490498	0.0749547	0.365945	0.198171	-0.295942	0.304269	0.464977	0.0938791	-0.297947	0.300847	-0.0380517	0.897241	-0.673185	0.00831966	0.428721	0.126127	-0.521501	0.0558086	0.754785	0.00180693	-0.23691	0.414788	0.241491	0.40555
DHX40	blue	-0.490276	0.0751064	-0.333188	0.244389	-0.161267	0.581788	-0.0394929	0.893369	0.0452598	0.877897	-0.202905	0.48661	0.105189	0.720433	0.869357	5.38523e-05	-0.853831	0.000101988	0.191097	0.512835	0.292118	0.310854	0.09342	0.750749
PCDHA11	blue	0.490091	0.0752327	0.148977	0.611241	0.584518	0.028145	-0.315025	0.272617	0.281577	0.32943	0.509543	0.0627175	-0.169307	0.562839	0.0694657	0.813458	-0.156711	0.592638	0.498134	0.069861	-0.123953	0.672892	0.194567	0.505063
FXYD6	blue	-0.489909	0.0753581	-0.75477	0.00180752	-0.378669	0.181836	-0.0448041	0.879119	-0.10061	0.732186	0.0206812	0.944055	0.488316	0.0764566	0.676602	0.00787678	-0.592882	0.0254472	-0.228999	0.430988	0.427141	0.127683	-0.15742	0.590944
CES2	blue	-0.489827	0.075414	0.0246385	0.93337	-0.313193	0.275568	0.380241	0.17988	-0.489861	0.0753909	0.344065	0.228373	-0.44525	0.110616	0.548666	0.0421803	-0.64584	0.0125954	0.652596	0.0114101	-0.156419	0.593337	-0.166207	0.570116
SH3PXD2B	blue	0.489526	0.0756211	-0.0343068	0.907312	0.552865	0.0403148	-0.318873	0.266481	-0.0683427	0.816426	0.699992	0.00531446	0.0125747	0.965969	-0.0330531	0.910687	-0.0429779	0.884015	0.293892	0.307789	-0.325497	0.256114	-0.196331	0.501132
ETV5	blue	-0.489492	0.0756445	-0.678567	0.00763061	-0.316191	0.270749	0.00089811	0.997569	-0.20094	0.490932	0.206205	0.479398	0.333859	0.243381	0.760999	0.00157194	-0.715587	0.00400606	0.107201	0.715285	0.109604	0.709153	-0.133932	0.648052
LGMN	blue	-0.489293	0.0757818	-0.165899	0.570839	-0.544069	0.0442943	0.456764	0.100617	-0.00776365	0.978986	0.0965936	0.742539	-0.254619	0.379681	0.300389	0.296711	-0.245111	0.398328	0.626487	0.0165166	-0.358937	0.207552	0.69241	0.00606042
UFL1	blue	-0.489084	0.0759258	-0.367095	0.196657	-0.185482	0.525525	0.0138802	0.962438	-0.0691504	0.814291	-0.042763	0.884591	0.0353547	0.904493	0.858713	8.41107e-05	-0.863373	6.951e-05	0.272657	0.345623	0.253001	0.382822	-0.0375989	0.898458
PLA2G5	blue	-0.488979	0.0759978	-0.374516	0.187068	-0.600778	0.0230831	0.377728	0.183014	0.0504659	0.863965	-0.168655	0.564365	0.0534605	0.855968	0.157092	0.591729	-0.0249133	0.932629	0.160001	0.584794	-0.221216	0.447234	0.597403	0.0240725
C5orf15	blue	-0.488927	0.0760343	-0.431225	0.123688	-0.189889	0.515552	-0.0112318	0.969602	-0.000183066	0.999504	-0.0352455	0.904787	0.129069	0.660114	0.889465	2.06702e-05	-0.858792	8.38451e-05	0.322129	0.261355	0.109222	0.710128	0.218131	0.453756
FAM114A2	blue	-0.488543	0.0762997	0.193232	0.508047	-0.295151	0.305624	0.26225	0.365061	-0.498324	0.0697374	-0.294439	0.306847	-0.223467	0.442505	0.299696	0.297881	-0.378603	0.181918	-0.129965	0.657887	0.282802	0.327239	-0.642996	0.0131217
ULK2	blue	-0.488159	0.0765656	-0.102793	0.726575	-0.158637	0.588043	0.152367	0.603059	-0.221019	0.447649	-0.0257757	0.930302	-0.216898	0.456375	0.767033	0.00136768	-0.807477	0.000478779	0.472696	0.0878383	0.00083977	0.997727	0.0226509	0.938736
CCDC9	blue	-0.488118	0.0765942	-0.579774	0.0297668	-0.611144	0.0202347	0.267078	0.355971	-0.0688141	0.81518	-0.121403	0.67929	0.294284	0.307114	0.206092	0.479643	-0.0683145	0.816501	-0.200516	0.491866	0.144586	0.621901	0.143503	0.624542
SRRM2	blue	0.487974	0.0766943	-0.170406	0.560268	0.559779	0.0373768	-0.483404	0.0799167	0.587046	0.0273081	0.572435	0.0324116	0.115527	0.694112	0.303738	0.291092	-0.335398	0.24108	0.488352	0.0764316	0.101433	0.730068	0.475353	0.0858238
IRF2BPL	blue	-0.487823	0.0767989	-0.583721	0.0284127	-0.454338	0.10267	0.188574	0.518519	0.0731343	0.803777	0.0457061	0.876702	0.185429	0.525645	0.557652	0.0382631	-0.442644	0.112969	0.299749	0.297792	-0.0802734	0.785013	0.559351	0.0375538
ATL2	blue	-0.487808	0.0768096	-0.722945	0.00348413	-0.304229	0.290274	-0.0629095	0.83082	0.188198	0.519369	-0.0527739	0.8578	0.38566	0.173242	0.848769	0.000123674	-0.744515	0.0022556	0.122593	0.676301	0.25766	0.373819	0.323619	0.259029
SNAI2	blue	-0.487728	0.0768655	-0.560401	0.0371204	-0.493774	0.0727381	0.209233	0.472823	0.195839	0.502228	-0.144204	0.622831	0.188748	0.518126	0.460943	0.0971483	-0.318801	0.266595	0.178795	0.540816	0.0222022	0.939947	0.604147	0.0221262
ZBED1	blue	-0.48752	0.0770099	-0.636546	0.0143774	-0.389923	0.168133	0.127785	0.663313	-0.508985	0.0630542	0.216136	0.457997	0.30612	0.287134	0.481049	0.0816136	-0.432246	0.122703	-0.069849	0.812445	-0.0902369	0.759009	-0.334525	0.242384
PAR-Y-ZBED1	blue	-0.48752	0.0770099	-0.636546	0.0143774	-0.389923	0.168133	0.127785	0.663313	-0.508985	0.0630542	0.216136	0.457997	0.30612	0.287134	0.481049	0.0816136	-0.432246	0.122703	-0.069849	0.812445	-0.0902369	0.759009	-0.334525	0.242384
PRKCI	blue	-0.487048	0.0773395	-0.32319	0.259698	-0.173035	0.554141	-0.0067741	0.981664	-0.041986	0.886676	-0.045813	0.876416	0.0580468	0.843744	0.883884	2.7432e-05	-0.891064	1.90076e-05	0.274465	0.342306	0.286424	0.320812	0.0492489	0.867219
RAD21	blue	-0.486921	0.0774283	-0.634203	0.0148556	-0.247174	0.394241	-0.1364	0.641958	0.222023	0.445536	-0.240751	0.407035	0.392024	0.165651	0.869537	5.34309e-05	-0.787367	0.000829313	-0.0840506	0.775129	0.552264	0.040578	0.14505	0.620772
ANGPT1	blue	-0.486748	0.0775496	-0.705888	0.0047856	-0.369087	0.194053	0.0410456	0.8892	0.113635	0.698904	0.110589	0.706645	0.290903	0.312965	0.768666	0.0013162	-0.67357	0.00826876	0.226946	0.435245	0.190284	0.514664	0.337898	0.237371
NUP93	blue	-0.486683	0.077595	-0.498281	0.0697655	-0.35772	0.20921	0.0658509	0.823021	-0.339777	0.234607	-0.0985603	0.737464	0.308696	0.282888	0.497956	0.069977	-0.46067	0.0973723	-0.320936	0.263226	0.376772	0.184214	-0.537906	0.0472482
NCAPG2	blue	-0.486543	0.077693	-0.130104	0.65754	-0.252458	0.383878	0.171414	0.557915	-0.215778	0.45876	0.156098	0.594105	-0.220091	0.449606	0.741528	0.00240142	-0.815239	0.000380802	0.430669	0.124226	0.273288	0.344463	-0.125012	0.67024
TCF19	blue	-0.486508	0.077718	0.245857	0.396847	-0.35973	0.206477	0.385825	0.173043	-0.345708	0.226012	-0.0848163	0.773129	-0.474613	0.0863815	0.34606	0.225508	-0.445294	0.110576	0.261393	0.366688	0.302468	0.293216	-0.211674	0.467555
GPR27	blue	-0.486166	0.0779575	-0.688072	0.00652255	-0.338	0.237221	-0.0121003	0.967252	0.0846437	0.773579	-0.0311259	0.915877	0.372183	0.190051	0.740415	0.00245762	-0.643884	0.0129555	0.00597482	0.983827	0.322863	0.260208	0.191832	0.511185
LRRN4	blue	-0.486166	0.0779581	-0.138535	0.636705	-0.413524	0.141629	0.421461	0.133383	-0.0875183	0.766082	0.0391666	0.894245	-0.297167	0.302175	0.396763	0.160143	-0.357819	0.209075	0.687193	0.0066194	-0.478186	0.083711	0.609494	0.0206693
FBXO36	blue	-0.486044	0.0780437	-0.697722	0.0055298	-0.329543	0.249905	-0.0736161	0.802507	-0.0566812	0.847381	-0.188383	0.518951	0.510532	0.062124	0.666892	0.00918539	-0.565626	0.0350178	-0.332215	0.245854	0.444444	0.11134	-0.219786	0.45025
TEK	blue	-0.485523	0.078411	-0.759545	0.00162462	-0.240557	0.407425	-0.116839	0.690792	0.0321573	0.913099	0.0897895	0.760172	0.404694	0.151195	0.94087	5.42825e-07	-0.87242	4.70318e-05	0.120643	0.681202	0.270054	0.35043	0.0820018	0.780486
PCED1A	blue	-0.485364	0.0785229	-0.660611	0.0101171	-0.568379	0.0339459	0.194944	0.504222	-0.056396	0.848141	-0.0654812	0.824001	0.360279	0.205734	0.285688	0.322113	-0.145387	0.619952	-0.171648	0.55737	0.0746869	0.799687	0.186678	0.522811
DENND5B	blue	-0.485247	0.0786055	-0.643824	0.0129667	-0.382147	0.177527	0.0194328	0.947428	0.314038	0.274204	-0.156943	0.592085	0.308072	0.283914	0.701215	0.0052012	-0.58272	0.0287516	0.0918743	0.754757	0.322974	0.260035	0.485968	0.0780969
GOLPH3	blue	-0.485197	0.0786408	-0.48563	0.0783354	-0.162627	0.578565	-0.0694806	0.813418	0.034533	0.906704	-0.121637	0.678702	0.202259	0.488029	0.915915	4.24848e-06	-0.877614	3.70831e-05	0.202895	0.486633	0.220399	0.448955	0.123031	0.675203
TAPBPL	blue	-0.485161	0.0786668	-0.260004	0.369332	-0.497425	0.0703237	0.418786	0.136125	-0.509493	0.0627477	0.263277	0.363117	-0.113001	0.700514	0.19883	0.49559	-0.189029	0.517494	0.341586	0.231965	-0.539431	0.0465043	-0.0268148	0.927498
ZNF175	blue	-0.485141	0.0786805	-0.387095	0.171511	-0.379564	0.18072	0.142476	0.627049	0.171181	0.558461	-0.201345	0.490039	0.0651727	0.824818	0.573045	0.0321853	-0.502827	0.0668558	0.169885	0.561486	0.252501	0.383795	0.329608	0.249805
CDH11	blue	-0.484994	0.0787851	-0.70455	0.00490182	-0.29008	0.314398	0.00365288	0.990112	0.0554462	0.850672	0.161395	0.581484	0.269125	0.352155	0.866843	6.00375e-05	-0.79046	0.000765019	0.348744	0.221689	0.0301076	0.918621	0.316797	0.26978
SLC35B4	blue	0.483913	0.0795528	-0.47126	0.0889409	0.703265	0.00501551	-0.829806	0.000240584	0.316606	0.270086	0.257908	0.373342	0.674351	0.00816639	0.348234	0.222411	-0.358176	0.208588	-0.403406	0.152625	0.450696	0.105806	-0.423556	0.131261
ADCY4	blue	-0.483691	0.0797116	-0.280572	0.331233	-0.310179	0.280461	0.203041	0.486314	-0.0893399	0.761341	-0.199776	0.493498	-0.00995723	0.97305	0.501981	0.0673911	-0.439524	0.115832	0.275872	0.339737	-0.216731	0.456729	0.383104	0.176352
GLA	blue	-0.483577	0.0797932	-0.195418	0.503164	-0.491517	0.0742601	0.245006	0.398535	0.300386	0.296715	-0.699169	0.00539179	0.0776662	0.791854	0.187183	0.521665	-0.0533613	0.856232	-0.165492	0.571798	0.236543	0.415531	0.528453	0.0520548
GPSM3	blue	-0.483206	0.0800586	-0.528597	0.051979	-0.617626	0.0185939	0.265859	0.358255	0.0199944	0.945911	-0.201869	0.488886	0.290531	0.313612	0.185627	0.525196	-0.0308844	0.916528	-0.166068	0.570442	0.0797544	0.786374	0.332859	0.244883
EPB41L2	blue	0.483124	0.0801173	-0.517456	0.058081	0.674273	0.00817665	-0.764997	0.00143409	0.485749	0.0782512	0.659308	0.0103193	0.495394	0.0716598	0.566773	0.0345684	-0.596865	0.0242332	0.206816	0.478067	0.260288	0.368791	0.0103877	0.971885
LMNB2	blue	-0.482776	0.0803668	-0.286985	0.319824	-0.362006	0.20341	0.262577	0.364441	-0.352597	0.216277	0.439247	0.116089	-0.158147	0.58921	0.627631	0.0162618	-0.672831	0.00836659	0.520428	0.0564053	-0.0298237	0.919386	-0.0408651	0.889684
NHSL2	blue	0.482636	0.0804676	-0.644198	0.0128972	0.541215	0.045645	-0.714554	0.00408395	0.659424	0.0103012	0.521298	0.0559214	0.642258	0.0132609	0.361663	0.203871	-0.310688	0.279631	0.0926951	0.752628	0.0973445	0.7406	0.350254	0.219557
ICMT	blue	-0.482621	0.0804782	0.309399	0.281736	-0.270462	0.349674	0.398301	0.158381	-0.584886	0.0280219	-0.0449275	0.878788	-0.526123	0.0532919	0.337128	0.23851	-0.462586	0.095807	0.320998	0.263129	0.00799237	0.978367	-0.379493	0.180808
DDX60L	blue	-0.482552	0.0805274	0.398932	0.157662	-0.241862	0.404806	0.411312	0.143986	-0.328737	0.251135	-0.200776	0.491292	-0.616992	0.0187498	0.382621	0.176944	-0.479596	0.0826734	0.54793	0.0425134	-0.155528	0.595471	0.00269265	0.992711
PRPF40B	blue	-0.482485	0.0805762	-0.610565	0.0203865	-0.242544	0.403442	-0.017436	0.952824	0.0536297	0.855516	0.0999278	0.733941	0.214736	0.460985	0.901439	1.06703e-05	-0.843545	0.000149826	0.310501	0.279936	0.172429	0.55555	0.212571	0.465625
NOTCH2	blue	-0.48186	0.0810264	-0.734188	0.00279149	-0.401571	0.154677	0.0785136	0.789629	0.0594697	0.839959	0.144923	0.621082	0.306947	0.285766	0.70373	0.00497414	-0.592083	0.0256963	0.230872	0.427125	0.0684889	0.81604	0.385735	0.173151
RBSN	blue	-0.48178	0.0810844	-0.0994502	0.735171	-0.229651	0.429642	0.252049	0.384674	-0.158223	0.589029	0.160156	0.584427	-0.341672	0.231839	0.714068	0.00412107	-0.759801	0.00161523	0.725682	0.00330428	-0.169201	0.563086	0.236334	0.415956
MICU3	blue	-0.481694	0.0811467	-0.451163	0.105399	-0.526053	0.0533294	0.255211	0.378536	0.131859	0.653184	-0.146514	0.617213	0.122629	0.676212	0.364719	0.199792	-0.235345	0.417967	0.0795853	0.786817	0.159514	0.585954	0.452687	0.104083
HIC1	blue	-0.481224	0.0814871	0.0456467	0.876861	-0.51339	0.0604316	0.572737	0.0322995	-0.322328	0.261043	0.27086	0.348937	-0.501043	0.0679871	0.204821	0.482415	-0.233603	0.421522	0.765386	0.0014212	-0.545218	0.0437585	0.377226	0.183643
ORC3	blue	-0.480906	0.0817176	-0.413024	0.14216	-0.156362	0.593474	-0.0619732	0.833305	0.00310053	0.991607	-0.0895004	0.760923	0.125173	0.669836	0.910166	6.23789e-06	-0.906517	7.85692e-06	0.148451	0.612514	0.438371	0.116903	-0.0448063	0.879113
GINS2	blue	-0.4808	0.0817948	0.0694887	0.813397	-0.409835	0.145574	0.253792	0.381286	-0.104047	0.723357	-0.312693	0.276376	-0.192374	0.509969	0.345463	0.226363	-0.38001	0.180167	-0.090223	0.759045	0.653815	0.0112056	-0.180095	0.537828
VPS4B	blue	-0.480673	0.0818869	-0.26437	0.361055	-0.123142	0.674925	-0.0306118	0.917262	-0.166448	0.569547	-0.095405	0.745611	0.0608247	0.836356	0.857162	8.9491e-05	-0.885716	2.50379e-05	0.172391	0.55564	0.266371	0.357294	-0.163397	0.576743
PACS1	blue	-0.47976	0.0825534	-0.65721	0.0106512	-0.286726	0.32028	0.0616032	0.834288	-0.173115	0.553955	0.309847	0.281004	0.218501	0.452971	0.792097	0.000732642	-0.739697	0.0024944	0.396905	0.159979	-0.186982	0.522121	0.173074	0.55405
RSC1A1	blue	-0.479369	0.0828404	-0.172453	0.555494	-0.122992	0.6753	0.0539183	0.854746	-0.23838	0.411812	0.00425972	0.988469	-0.118076	0.687668	0.818982	0.000339719	-0.879947	3.32123e-05	0.331093	0.24755	0.164684	0.573702	-0.199446	0.494227
GPX7	blue	-0.479152	0.0829991	-0.822013	0.000309139	-0.377469	0.183338	-0.0537555	0.855181	0.159934	0.584953	-0.132313	0.65206	0.523473	0.0547249	0.684982	0.00686796	-0.539061	0.0466839	-0.12798	0.662828	0.283101	0.326706	0.256493	0.376063
TBC1D23	blue	-0.478903	0.0831824	-0.18813	0.519524	-0.145293	0.62018	0.0616898	0.834058	-0.194844	0.504445	-0.0844468	0.774094	-0.062091	0.832993	0.797461	0.00063416	-0.822455	0.000304869	0.308946	0.282479	0.124536	0.671431	-0.0756859	0.797058
ACOT2	blue	-0.478889	0.0831926	-0.680894	0.00734676	-0.467346	0.0919953	0.135597	0.643939	-0.222736	0.444037	0.188051	0.519701	0.342922	0.230025	0.494951	0.0719533	-0.405972	0.149785	0.0107238	0.970976	0.0287725	0.922219	0.0469257	0.873436
NT5C2	blue	-0.478786	0.0832689	-0.0233504	0.936847	-0.157404	0.590984	0.150045	0.608659	-0.257269	0.37457	0.0298789	0.919237	-0.263048	0.363551	0.767265	0.00136028	-0.839521	0.000172891	0.497346	0.070375	0.0533378	0.856295	-0.0716971	0.807566
NPTX1	blue	-0.478634	0.0833809	-0.463804	0.0948219	-0.458781	0.0989321	0.170819	0.559305	0.285817	0.321884	-0.117899	0.688115	0.113202	0.700004	0.546743	0.0430553	-0.442053	0.113508	0.200308	0.492325	0.288045	0.317959	0.590109	0.0263193
MASTL	blue	-0.478344	0.0835949	0.204941	0.482155	-0.329152	0.2505	0.320453	0.263987	-0.225622	0.438	-0.117598	0.688875	-0.405579	0.150217	0.447053	0.109007	-0.528044	0.0522702	0.286947	0.31989	0.344521	0.227717	-0.131925	0.65302
ZNF141	blue	-0.478196	0.0837039	-0.521829	0.0556277	-0.448987	0.107299	0.0668067	0.82049	0.19987	0.493292	-0.412297	0.142933	0.325272	0.256462	0.413235	0.141935	-0.29069	0.313336	-0.296556	0.303218	0.452158	0.104539	0.21858	0.452802
NBPF15	blue	0.478027	0.083829	0.143175	0.625342	0.618187	0.0184569	-0.382176	0.177491	0.100417	0.732681	0.659891	0.0102284	-0.120593	0.681327	0.171154	0.558522	-0.302073	0.293878	0.487224	0.0772164	-0.116242	0.692303	-0.139919	0.633308
POLD1	blue	-0.477849	0.083961	-0.551653	0.0408472	-0.448882	0.107391	0.162724	0.578336	-0.207911	0.475686	0.256367	0.376305	0.167418	0.567267	0.56451	0.0354592	-0.527363	0.052631	0.0928284	0.752282	0.28778	0.318426	-0.101218	0.730622
KIF20B	blue	-0.477469	0.0842426	0.0396586	0.892924	-0.278396	0.335154	0.213675	0.463257	0.0412239	0.888721	-0.263126	0.363402	-0.295226	0.305495	0.588594	0.0268051	-0.621739	0.0176064	0.274622	0.342018	0.459355	0.0984566	0.116043	0.692806
DCAKD	blue	-0.477381	0.0843077	-0.735793	0.0027022	-0.449937	0.106467	0.0731366	0.803771	-0.0621261	0.8329	0.0957716	0.744663	0.415327	0.139726	0.54124	0.0456328	-0.434684	0.120371	-0.0356316	0.903748	0.108602	0.71171	0.131485	0.654112
ZFP14	blue	-0.477275	0.0843867	-0.521112	0.0560245	-0.35871	0.207861	0.0347338	0.906163	0.180138	0.53773	-0.29845	0.299993	0.267048	0.356027	0.574993	0.0314706	-0.46077	0.0972899	-0.0537335	0.855239	0.260618	0.368162	0.283068	0.326764
ATP2A2	blue	-0.477139	0.0844874	-0.582739	0.0287453	-0.229921	0.429085	0.00661417	0.982097	-0.0606268	0.836882	0.241661	0.40521	0.154088	0.598923	0.904284	9.00765e-06	-0.882888	2.88102e-05	0.457268	0.100194	-0.0176297	0.9523	0.196744	0.500214
RP1	blue	-0.477103	0.0845147	-0.626496	0.0165145	-0.356769	0.210511	0.0232498	0.937119	0.257827	0.373498	-0.1674	0.567309	0.3005	0.296524	0.673704	0.00825121	-0.558148	0.038055	0.107657	0.714122	0.208834	0.473686	0.464286	0.0944335
SKIDA1	blue	-0.477091	0.0845238	-0.67058	0.00866991	-0.426354	0.128462	-0.0074055	0.979955	0.311588	0.278168	-0.313625	0.27487	0.442286	0.113296	0.589891	0.0263886	-0.439465	0.115887	-0.192476	0.509739	0.479832	0.0825013	0.404229	0.15171
SLC30A5	blue	-0.476861	0.0846944	-0.20254	0.487411	-0.139429	0.634509	0.060352	0.837613	-0.176021	0.547217	0.0480938	0.870309	-0.114387	0.696999	0.859561	8.12829e-05	-0.908283	7.03521e-06	0.434066	0.120959	0.137096	0.640243	-0.0423429	0.885718
ZNF114	blue	-0.476629	0.0848674	-0.103059	0.725893	-0.523089	0.0549347	0.318858	0.266505	0.15709	0.591733	-0.301672	0.294552	-0.122534	0.67645	0.312661	0.276428	-0.261113	0.36722	0.0455589	0.877096	0.554322	0.0396822	0.314701	0.273136
PITX2	blue	-0.47605	0.0853008	-0.26578	0.358402	-0.416099	0.138917	0.316063	0.270953	-0.0246925	0.933224	0.140563	0.631729	-0.189962	0.51539	0.552085	0.0406568	-0.526291	0.0532019	0.547663	0.0426349	0.0110802	0.970012	0.459296	0.098505
LRRC37A4P	blue	-0.475654	0.0855972	0.175415	0.548618	-0.185654	0.525134	0.245918	0.396728	-0.13389	0.648155	-0.203012	0.486376	-0.413167	0.142008	0.593198	0.0253494	-0.659156	0.0103431	0.491677	0.0741513	0.0412904	0.888543	0.118792	0.685862
FADS1	blue	-0.475545	0.0856796	-0.282764	0.327307	-0.333564	0.243823	0.126155	0.667383	-0.136711	0.641192	0.122883	0.675575	-0.0404991	0.890667	0.671127	0.00859547	-0.70312	0.00502854	0.200392	0.492138	0.45551	0.101674	-0.150336	0.607957
AC022384.1	blue	-0.475474	0.085733	-0.288047	0.317956	-0.158557	0.588233	0.0459856	0.875953	-0.21327	0.464124	0.112612	0.701503	-0.052173	0.859405	0.864374	6.66604e-05	-0.909048	6.70146e-06	0.382856	0.176657	0.153209	0.601033	-0.154339	0.598321
DCLK1	blue	0.475184	0.0859512	-0.407439	0.148177	0.585362	0.0278634	-0.712056	0.00427735	0.299035	0.299	0.358203	0.208551	0.589595	0.0264831	0.273924	0.343296	-0.290262	0.314081	-0.350626	0.219035	0.56685	0.0345383	-0.42186	0.132976
PTER	blue	-0.474997	0.0860919	-0.652529	0.0114214	-0.41481	0.14027	0.0174131	0.952886	0.254548	0.37982	-0.22261	0.444302	0.345667	0.22607	0.6283	0.0161141	-0.508696	0.063229	-0.111727	0.70375	0.541743	0.0453928	0.267294	0.355567
SIMC1	blue	-0.474918	0.0861514	-0.569453	0.0335346	-0.211628	0.467652	-0.0342902	0.907357	0.106616	0.716781	0.0657704	0.823234	0.164341	0.574513	0.946497	3.01598e-07	-0.905319	8.45836e-06	0.326162	0.255088	0.298834	0.29934	0.238468	0.411633
RPS6KA5	blue	-0.474633	0.0863663	-0.528311	0.0521294	-0.382509	0.177083	0.0638032	0.828449	0.153116	0.601258	-0.448082	0.108096	0.325326	0.256379	0.435861	0.119256	-0.299022	0.299022	-0.175881	0.547541	0.153237	0.600967	0.335531	0.240882
C2orf42	blue	-0.474413	0.086533	-0.108849	0.711079	-0.253232	0.382372	0.186506	0.5232	-0.042353	0.885691	-0.206066	0.479701	-0.120689	0.681084	0.57146	0.0327756	-0.547104	0.0428901	0.361905	0.203546	-0.0916431	0.755357	0.305609	0.287981
SRRD	blue	0.474147	0.086734	-0.188133	0.519516	0.541881	0.0453271	-0.619144	0.0182247	0.607321	0.0212524	-0.279447	0.333257	0.506906	0.0643202	-0.0526125	0.858231	0.109453	0.709539	-0.563924	0.0356926	0.500995	0.068018	0.0197378	0.946604
FUT10	blue	-0.473263	0.0874054	-0.56517	0.0351978	-0.229588	0.429772	-0.0616625	0.834131	0.00737512	0.980037	0.111988	0.703088	0.227308	0.434492	0.891495	1.85782e-05	-0.867404	5.86088e-05	0.199896	0.493234	0.332777	0.245007	0.0568424	0.846951
FBXO42	blue	-0.473139	0.0875005	-0.157595	0.590528	-0.182527	0.532259	0.114145	0.697613	-0.131684	0.653618	0.0363871	0.901716	-0.137902	0.63826	0.781363	0.000966437	-0.812808	0.000409565	0.505618	0.065113	-0.0373312	0.899178	0.0904725	0.758397
UBASH3B	blue	-0.473009	0.0875997	-0.838912	0.000176616	-0.318001	0.267865	-0.0708941	0.809685	-0.0243722	0.934089	0.0783155	0.790149	0.492219	0.0737843	0.764886	0.00143777	-0.665315	0.00941287	-0.0745715	0.799991	0.282079	0.328531	-0.00618127	0.983268
TMEM39B	blue	-0.472528	0.0879668	-0.599342	0.0235001	-0.547459	0.0427278	0.271796	0.34721	-0.0826064	0.778904	0.134873	0.645725	0.182717	0.531825	0.353346	0.215234	-0.24129	0.405953	0.191022	0.513005	-0.145701	0.619189	0.335805	0.240475
PLK1	blue	-0.472466	0.0880146	-0.290489	0.313685	-0.353647	0.214816	0.196098	0.50165	-0.307834	0.284304	0.236216	0.416196	-0.0679698	0.817413	0.585075	0.027959	-0.623234	0.0172575	0.211855	0.467164	0.298864	0.29929	-0.242269	0.403993
IQCH	blue	-0.471831	0.0885013	0.394497	0.162762	-0.283745	0.325559	0.448487	0.107739	-0.295984	0.304197	-0.154058	0.598995	-0.640264	0.0136428	0.319994	0.26471	-0.419228	0.135669	0.629747	0.0157984	-0.277977	0.335912	0.105144	0.720548
AKT2	blue	-0.471806	0.0885209	-0.336123	0.240001	-0.557109	0.0384922	0.378826	0.181639	0.0510167	0.862494	-0.188908	0.517765	-0.0169943	0.954018	0.147329	0.615233	-0.0218992	0.940766	0.151797	0.604432	-0.161576	0.581055	0.618677	0.0183377
GAS7	blue	-0.471632	0.0886543	-0.409943	0.145458	-0.430583	0.12431	0.286444	0.320777	-0.0409269	0.889518	0.284339	0.324503	-0.0743195	0.800654	0.54465	0.0440226	-0.501569	0.0676525	0.568895	0.033748	-0.175676	0.548015	0.472073	0.088316
TOPORS	blue	-0.471426	0.0888135	-0.491032	0.0745899	-0.225487	0.438282	-0.0646072	0.826317	0.11564	0.693826	-0.128823	0.660727	0.214853	0.460735	0.845074	0.000141746	-0.799761	0.000595335	0.0633532	0.829643	0.498863	0.0693881	0.0641918	0.827418
IRF1	blue	-0.471232	0.0889631	-0.418571	0.136347	-0.501609	0.0676269	0.268703	0.352939	0.229658	0.429626	-0.0297518	0.91958	0.0183374	0.950388	0.430412	0.124476	-0.325871	0.255537	0.384165	0.175057	-0.05166	0.860775	0.737724	0.0025978
NELFB	blue	-0.471075	0.0890841	0.00860508	0.976709	-0.46994	0.0899628	0.495663	0.0714818	-0.664437	0.00954127	0.414473	0.140625	-0.37019	0.192621	0.200237	0.492481	-0.274416	0.342396	0.463586	0.0949978	-0.362384	0.202903	-0.220939	0.447817
RHOBTB3	blue	-0.47072	0.0893585	-0.450133	0.106296	-0.390722	0.167186	0.131175	0.654882	0.325646	0.255885	-0.221516	0.446602	0.115716	0.693633	0.595172	0.0247436	-0.483005	0.0802026	0.264981	0.359904	0.139333	0.634745	0.677131	0.00780988
ESYT2	blue	-0.470555	0.0894863	-0.251613	0.385526	-0.132278	0.652144	0.0738736	0.801829	-0.341149	0.232602	0.159073	0.587005	-0.08197	0.78057	0.824317	0.00028741	-0.878574	3.54477e-05	0.393557	0.163856	0.0262189	0.929106	-0.26947	0.351514
TMSB15A	blue	-0.470355	0.0896411	-0.331704	0.246625	-0.259183	0.3709	-0.0166439	0.954965	0.0989831	0.736374	-0.182381	0.532592	0.122018	0.677745	0.77515	0.00112685	-0.761937	0.00153869	0.00723169	0.980425	0.685767	0.00677886	4.3505e-05	0.999882
UBE2G1	blue	0.469677	0.0901678	-0.355828	0.211802	0.766502	0.00138477	-0.797156	0.000639466	0.386758	0.171916	0.365116	0.199267	0.498941	0.0693379	0.526104	0.0533018	-0.562904	0.036102	0.000887087	0.997599	0.260229	0.368902	-0.161938	0.580197
ODF2	blue	0.469276	0.0904802	-0.0282968	0.923502	0.54327	0.0446692	-0.418096	0.136838	0.402136	0.154044	0.681351	0.00729195	-0.0261601	0.929265	0.274256	0.342688	-0.35835	0.208351	0.553062	0.040229	0.0689758	0.814753	0.254174	0.380543
NR5A2	blue	-0.469044	0.0906619	0.0546021	0.852922	-0.190416	0.514367	0.131457	0.654182	-0.176397	0.546346	-0.282302	0.328132	-0.167451	0.567191	0.599306	0.0235109	-0.639563	0.0137791	0.154048	0.599019	0.269328	0.351778	-0.130431	0.656728
TROAP	blue	-0.469026	0.0906759	0.0119599	0.967632	-0.314127	0.27406	0.291169	0.312502	-0.279739	0.332731	0.136931	0.640649	-0.333134	0.24447	0.536918	0.047735	-0.612076	0.0199924	0.394446	0.162821	0.227736	0.433605	-0.134278	0.647195
DNA2	blue	-0.468645	0.0909741	-0.31691	0.269601	-0.273063	0.344877	0.0391531	0.894282	0.128799	0.660789	-0.102817	0.726512	0.0542087	0.853972	0.762061	0.00153432	-0.744216	0.00226992	0.148725	0.611851	0.564741	0.0353677	0.127125	0.664961
ESCO2	blue	-0.468335	0.0912167	0.09211	0.754146	-0.28204	0.328601	0.214905	0.460625	-0.165186	0.572519	-0.106957	0.715909	-0.306081	0.287197	0.553935	0.0398494	-0.631851	0.0153477	0.23535	0.417957	0.464309	0.0944147	-0.153279	0.600867
IRAK1BP1	blue	-0.468235	0.0912952	-0.475931	0.0853899	-0.545555	0.0436025	0.185355	0.525813	-0.116396	0.691912	-0.166695	0.568966	0.306154	0.287077	0.257714	0.373714	-0.158007	0.589544	-0.354413	0.213755	0.41974	0.135142	-0.145597	0.619442
TLK1	blue	0.468186	0.0913337	0.054726	0.852592	0.614487	0.0193755	-0.500737	0.0681825	0.523705	0.0545983	0.354095	0.214194	0.00738392	0.980013	0.264918	0.360022	-0.3501	0.219775	0.344926	0.227133	0.236508	0.415603	0.164155	0.574952
LDB2	blue	-0.46817	0.0913462	-0.805748	0.000503151	-0.365065	0.199334	-0.078167	0.790539	0.0472564	0.87255	-0.0525373	0.858432	0.545698	0.0435364	0.679714	0.00748966	-0.562627	0.0362133	-0.208025	0.475439	0.365117	0.199265	-0.0106264	0.971239
SUCLA2	blue	0.468082	0.0914156	0.203314	0.485713	0.604669	0.0219807	-0.516749	0.0584849	0.50271	0.06693	0.0174155	0.95288	0.0663275	0.821759	0.119631	0.683748	-0.191883	0.511069	0.00643948	0.982569	0.426134	0.128681	0.00635824	0.982789
EDNRA	blue	-0.467995	0.0914838	-0.594639	0.0249061	-0.278425	0.335101	0.0632984	0.829788	-0.14142	0.629631	0.211584	0.467747	0.191617	0.511666	0.713971	0.00412848	-0.672862	0.00836243	0.321094	0.262978	-0.151072	0.606181	0.155522	0.595484
RASSF8	blue	-0.467904	0.0915554	-0.130205	0.657291	-0.161516	0.581197	0.0855071	0.771326	-0.099354	0.735419	-0.440229	0.115182	-0.0188919	0.94889	0.561051	0.0368537	-0.541717	0.0454048	0.0537278	0.855255	0.0530549	0.85705	0.0167179	0.954765
EIF4G1	blue	0.467559	0.0918275	0.104047	0.723357	0.47172	0.0885873	-0.246353	0.395865	0.000764244	0.997931	0.796649	0.000648348	-0.148045	0.613497	-0.0143015	0.961299	-0.112192	0.702568	0.463771	0.0948485	-0.170897	0.559122	-0.132197	0.652347
SDE2	blue	-0.467536	0.0918453	-0.513431	0.0604077	-0.127545	0.663913	-0.0735568	0.802663	-0.15807	0.589395	0.0639787	0.827983	0.204782	0.482501	0.92618	1.98989e-06	-0.914672	4.62662e-06	0.193989	0.506354	0.187401	0.521173	-0.127909	0.663005
DPH2	blue	-0.467437	0.0919234	-0.424071	0.130742	-0.412548	0.142666	0.234896	0.418881	-0.575885	0.0311473	0.349442	0.220702	0.0971617	0.741072	0.412237	0.142997	-0.416105	0.138911	0.103163	0.725626	-0.102334	0.727755	-0.34458	0.227631
ATR	blue	-0.467323	0.0920133	-0.162644	0.578523	-0.171649	0.557368	0.0990073	0.736312	-0.0980358	0.738816	-0.0476312	0.871547	-0.123993	0.672791	0.779766	0.0010058	-0.79853	0.000615871	0.430079	0.1248	0.0970615	0.741331	0.143746	0.623947
FNBP1	blue	-0.46732	0.0920162	-0.732841	0.0028682	-0.431383	0.123535	-0.00266942	0.992774	0.221468	0.446702	-0.318833	0.266545	0.493655	0.0728177	0.489879	0.0753784	-0.329431	0.250074	-0.290344	0.313938	0.351054	0.218434	0.289761	0.314955
SYTL2	blue	-0.467115	0.0921779	-0.456231	0.101066	-0.389498	0.168638	0.152709	0.602237	0.298865	0.299288	-0.120535	0.681473	0.074482	0.800227	0.600046	0.0232952	-0.496599	0.0708649	0.383648	0.175687	0.0141622	0.961675	0.725212	0.0033346
WDR81	blue	-0.466841	0.0923948	-0.501755	0.0675343	-0.49427	0.0724065	0.32048	0.263944	-0.3793	0.181049	0.251616	0.38552	0.105505	0.719624	0.280011	0.332242	-0.204104	0.483985	0.1966	0.500536	-0.377342	0.183498	0.0724743	0.805517
PROSER2	blue	-0.466698	0.0925077	-0.283332	0.326295	-0.463153	0.0953475	0.30893	0.282505	0.0109389	0.970394	-0.245886	0.39679	0.0123262	0.966641	0.23619	0.416249	-0.134046	0.64777	0.139115	0.635281	-0.173652	0.552707	0.531878	0.0502742
LINC02381	blue	-0.466299	0.0928249	-0.721434	0.00358671	-0.39961	0.156892	-0.0166168	0.955039	0.14734	0.615208	-0.267518	0.355149	0.497329	0.0703859	0.532315	0.0500503	-0.387632	0.170866	-0.272705	0.345534	0.339561	0.234924	0.241688	0.405155
RUNX1	blue	-0.466241	0.0928708	-0.726707	0.00323881	-0.409828	0.145582	0.0314353	0.915044	0.252496	0.383804	-0.0996022	0.734779	0.38769	0.170796	0.622031	0.0175378	-0.478753	0.083293	0.0426495	0.884896	0.206079	0.479672	0.462972	0.0954942
LANCL1	blue	-0.466035	0.0930344	-0.411699	0.143572	-0.119875	0.683135	-0.0554503	0.850661	-0.144875	0.621197	0.103496	0.72477	0.113369	0.699581	0.939979	5.92612e-07	-0.955832	9.74222e-08	0.318944	0.26637	0.143858	0.623676	-0.0836276	0.776234
PUS7	blue	-0.465848	0.0931838	-0.402127	0.154054	-0.153712	0.599825	-0.0539791	0.854584	0.0300869	0.918677	0.0207836	0.943779	0.0957956	0.744601	0.932204	1.20993e-06	-0.937924	7.22e-07	0.333575	0.243808	0.246524	0.395527	0.0613175	0.835047
CASC10	blue	-0.465715	0.0932898	-0.715579	0.00400661	-0.40128	0.155005	-0.0387092	0.895474	0.0527515	0.85786	-0.0783223	0.790131	0.506236	0.0647318	0.603602	0.0222791	-0.491331	0.0743861	-0.202836	0.486763	0.346007	0.225584	0.0808779	0.783429
AP000944.2	blue	-0.465687	0.0933115	0.090391	0.758608	-0.216941	0.456283	0.172631	0.555081	-0.283772	0.325512	-0.189607	0.516189	-0.212724	0.465296	0.558111	0.0380705	-0.632342	0.0152439	0.117011	0.690357	0.377011	0.183914	-0.309048	0.28231
ATE1	blue	-0.465643	0.0933473	-0.507822	0.0637603	-0.132397	0.651851	-0.100187	0.733275	-0.000221293	0.999401	-0.0391774	0.894216	0.221239	0.447185	0.928241	1.68655e-06	-0.901349	1.0727e-05	0.155416	0.595739	0.300221	0.296995	-0.00129686	0.996489
KNTC1	blue	-0.465291	0.0936282	-0.315043	0.272588	-0.213679	0.463248	0.0134885	0.963497	0.102142	0.728247	-0.0357534	0.90342	0.0100647	0.972759	0.858003	8.65405e-05	-0.862799	7.11862e-05	0.284028	0.325056	0.484088	0.079428	0.139033	0.635482
AGTPBP1	blue	0.465282	0.0936352	-0.24689	0.394804	0.663146	0.00973266	-0.666331	0.00926581	0.138791	0.636077	0.424529	0.130283	0.404278	0.151656	0.309541	0.281503	-0.378909	0.181536	-0.191917	0.510994	0.431323	0.123593	-0.55165	0.0408485
STK24	blue	-0.465098	0.0937824	-0.354053	0.214254	-0.339758	0.234636	0.187842	0.520174	-0.0321049	0.91324	-0.172262	0.55594	0.0748072	0.799371	0.472762	0.087788	-0.401732	0.154497	0.192543	0.50959	-0.104435	0.722363	0.307419	0.284989
PAQR8	blue	-0.465087	0.0937907	-0.731814	0.00292782	-0.206859	0.477972	-0.152245	0.603354	0.0859411	0.770193	0.0193908	0.947541	0.416975	0.138003	0.9354	9.11979e-07	-0.86858	5.57065e-05	0.0458818	0.876231	0.388567	0.169747	0.0819215	0.780697
CSRNP3	blue	0.465028	0.093838	-0.459575	0.0982747	0.462378	0.0959766	-0.559163	0.0376319	0.753598	0.00185482	0.363684	0.201167	0.475023	0.0860725	0.21945	0.450961	-0.139066	0.635401	0.194822	0.504494	0.00894418	0.975791	0.645524	0.0126531
SLC7A2	blue	-0.464932	0.093915	-0.848096	0.000126817	-0.285883	0.321769	-0.102338	0.727743	-0.0192553	0.947907	0.0262239	0.929092	0.51668	0.0585246	0.799287	0.000603178	-0.692091	0.00609352	-0.0986394	0.73726	0.302641	0.292926	-0.00828338	0.977579
URI1	blue	-0.464423	0.0943231	-0.188739	0.518148	-0.398126	0.158581	0.211479	0.467974	0.0404631	0.890763	-0.284024	0.325063	0.015574	0.957858	0.348964	0.221378	-0.293401	0.308636	0.045061	0.87843	0.114978	0.695501	0.211905	0.467058
RCN3	blue	-0.464002	0.0946622	-0.147916	0.61381	-0.58307	0.0286328	0.560982	0.036882	-0.271495	0.347765	0.149664	0.609579	-0.305239	0.288594	0.0857138	0.770786	-0.0422375	0.886001	0.470134	0.0898121	-0.38569	0.173205	0.332688	0.245141
RAD51	blue	-0.463981	0.0946791	0.245752	0.397056	-0.463701	0.0949047	0.412747	0.142454	-0.230017	0.428887	-0.269483	0.351489	-0.379291	0.18106	0.135347	0.644554	-0.189654	0.516083	-0.0120682	0.967339	0.492429	0.0736427	-0.213746	0.463104
ZRANB1	blue	-0.463809	0.0948178	-0.393133	0.164351	-0.214461	0.461574	-0.00488442	0.986778	0.190205	0.514841	-0.266725	0.356632	0.15076	0.606932	0.750081	0.00200267	-0.690491	0.00626155	0.170781	0.559392	0.212985	0.464736	0.275908	0.339671
PDZD2	blue	-0.463746	0.0948686	-0.0784407	0.78982	-0.290351	0.313926	0.23308	0.422592	0.038759	0.89534	-0.0478274	0.871022	-0.276558	0.338488	0.594215	0.0250359	-0.608186	0.0210188	0.569695	0.0334425	-0.0224239	0.939349	0.419521	0.135368
ACTR6	blue	-0.463732	0.0948799	-0.329468	0.250019	-0.195891	0.502112	-0.065159	0.824854	0.0562382	0.848561	-0.417191	0.137777	0.221964	0.44566	0.692087	0.00609393	-0.649806	0.0118886	-0.16416	0.574941	0.472474	0.0880084	-0.146702	0.616757
ZFP36	blue	-0.46362	0.0949701	-0.307934	0.28414	-0.501221	0.0678736	0.432068	0.122874	-0.340993	0.232828	0.219283	0.451313	-0.123483	0.674068	0.261198	0.367058	-0.203795	0.484661	0.449965	0.106443	-0.468128	0.0913797	0.298602	0.299735
TRERF1	blue	-0.463403	0.0951458	-0.218302	0.453393	-0.503869	0.0662016	0.354816	0.213197	0.0800552	0.785585	0.00868057	0.976504	-0.20213	0.488314	0.355223	0.212636	-0.314545	0.273388	0.359683	0.206541	0.162363	0.579189	0.414571	0.140522
FCF1	blue	-0.463274	0.0952498	0.232573	0.42363	-0.241346	0.405841	0.238646	0.411275	-0.245718	0.397123	-0.266282	0.357461	-0.358179	0.208584	0.457273	0.10019	-0.545358	0.0436935	0.152537	0.602651	0.370608	0.19208	-0.265373	0.359166
ACER2	blue	-0.463253	0.0952671	-0.311648	0.27807	-0.248474	0.391679	0.115371	0.694505	0.141404	0.62967	0.0261077	0.929406	-0.0826941	0.778675	0.770043	0.001274	-0.74651	0.00216222	0.57718	0.0306825	-0.00794784	0.978487	0.542753	0.0449132
POMGNT2	blue	-0.463208	0.0953034	-0.785586	0.000868246	-0.378453	0.182105	0.00705414	0.980906	-0.0503898	0.864169	-0.0436074	0.882327	0.496858	0.0706946	0.571536	0.0327473	-0.440504	0.114928	-0.176876	0.545239	0.169235	0.563007	0.0761477	0.795844
ATPAF1	blue	-0.463078	0.0954085	-0.65669	0.0107347	-0.218564	0.452836	-0.14793	0.613776	-0.0325986	0.911911	0.00751691	0.979653	0.413056	0.142125	0.877207	3.77941e-05	-0.834099	0.000208432	-0.0967508	0.742133	0.518129	0.0576987	-0.155083	0.596536
EPRS	blue	-0.462995	0.0954754	-0.214978	0.460469	-0.152741	0.602159	0.0700453	0.811927	-0.211689	0.467521	0.0756334	0.797197	-0.120307	0.682046	0.804368	0.000523306	-0.860848	7.71388e-05	0.339731	0.234675	0.253689	0.381485	-0.184245	0.52834
TTC33	blue	-0.4626	0.0957956	-0.723359	0.00345647	-0.185111	0.526368	-0.165974	0.570664	0.0698478	0.812448	-0.104919	0.721122	0.449309	0.107017	0.901661	1.05321e-05	-0.819556	0.000333749	-0.0335548	0.909336	0.327522	0.252995	0.0110701	0.970039
NR2F1-AS1	blue	-0.462569	0.0958214	0.0294455	0.920405	-0.252004	0.384763	0.270338	0.349903	-0.126846	0.665656	-0.266527	0.357003	-0.267929	0.354382	0.442449	0.113148	-0.435747	0.119364	0.431947	0.122991	-0.286594	0.320512	0.342074	0.231254
NRF1	blue	-0.462537	0.0958469	-0.662323	0.00985625	-0.320913	0.263263	-0.0587594	0.841848	0.137597	0.63901	4.0672e-05	0.99989	0.341198	0.23253	0.78537	0.000873064	-0.715199	0.0040352	0.0241466	0.934698	0.459421	0.0984015	0.125602	0.668763
PGM3	blue	-0.462516	0.0958646	0.423346	0.131473	-0.211026	0.46895	0.358167	0.208601	-0.428324	0.126517	-0.209408	0.472443	-0.570068	0.0333008	0.368562	0.194738	-0.488054	0.0766386	0.364538	0.200032	0.0287483	0.922285	-0.263836	0.362062
INPPL1	blue	-0.462419	0.0959432	-0.216935	0.456295	-0.44532	0.110553	0.444829	0.110994	-0.345287	0.226616	0.392515	0.165075	-0.286054	0.321467	0.340063	0.234188	-0.34122	0.232498	0.706795	0.00470803	-0.57207	0.0325474	0.350073	0.219813
AC022149.1	blue	-0.461999	0.0962852	0.154571	0.597763	-0.172844	0.554586	0.280954	0.330547	-0.505054	0.065463	0.162316	0.579301	-0.450587	0.1059	0.579448	0.0298808	-0.704811	0.00487902	0.582477	0.0288342	-0.18297	0.531247	-0.25146	0.385824
SUV39H1	blue	-0.461928	0.0963428	-0.263938	0.361868	-0.316698	0.269939	0.162724	0.578334	-0.434242	0.120792	0.244744	0.399058	-0.00900436	0.975628	0.564201	0.0355823	-0.617216	0.0186947	0.136875	0.640789	0.210057	0.47104	-0.451314	0.105269
SLIT3	blue	-0.461809	0.0964396	-0.344657	0.22752	-0.295058	0.305784	0.166176	0.570187	0.0724862	0.805485	-0.150768	0.606914	-0.0132691	0.964091	0.590008	0.0263513	-0.516365	0.0587052	0.380728	0.179276	-0.120082	0.682613	0.567768	0.0341819
TNS2	blue	-0.461726	0.0965074	-0.601218	0.0229563	-0.326511	0.254549	0.0746169	0.799872	-0.186189	0.52392	0.408917	0.146568	0.16554	0.571685	0.771831	0.00122086	-0.753244	0.00186932	0.372229	0.189992	0.0453389	0.877686	0.000664467	0.998201
JAM3	blue	-0.461719	0.096513	0.130239	0.657205	-0.160872	0.582724	0.194608	0.504971	-0.499321	0.0690919	-0.0564325	0.848043	-0.299737	0.297811	0.533789	0.0493002	-0.64646	0.0124829	0.206569	0.478605	0.120244	0.682205	-0.512	0.0612504
CDC27	blue	-0.461489	0.0967011	0.0619922	0.833255	-0.156868	0.592265	0.15144	0.605292	-0.161997	0.580057	-0.114021	0.697925	-0.299131	0.298838	0.689007	0.00642064	-0.765488	0.00141785	0.406649	0.149041	0.183662	0.529669	-0.105132	0.720578
TEPSIN	blue	-0.461403	0.0967713	-0.289064	0.316173	-0.513049	0.0606316	0.348582	0.221917	-0.242685	0.40316	0.0247429	0.933089	-7.79559e-05	0.999789	0.184284	0.528249	-0.107538	0.714425	0.166828	0.568654	-0.288087	0.317886	0.259855	0.369617
USP25	blue	-0.46128	0.096872	-0.0594492	0.840013	-0.119588	0.683857	0.117059	0.690238	-0.173926	0.55207	0.015589	0.957817	-0.241431	0.40567	0.786286	0.000852763	-0.853467	0.000103439	0.527353	0.0526362	0.0129743	0.964888	-0.00101235	0.99726
ZNF367	blue	-0.460944	0.0971474	0.252076	0.384621	-0.344578	0.227635	0.341775	0.23169	-0.26452	0.360771	-0.111698	0.703823	-0.428378	0.126464	0.350879	0.218679	-0.441944	0.113608	0.214327	0.461859	0.399938	0.15652	-0.170439	0.560191
BCL3	blue	-0.460807	0.0972596	-0.404757	0.151125	-0.489188	0.0758537	0.335728	0.240589	-0.196856	0.499966	0.029181	0.921118	0.0628509	0.830976	0.267693	0.354823	-0.166562	0.569279	0.262125	0.365297	-0.409763	0.145653	0.299085	0.298916
SLC4A4	blue	-0.460625	0.0974092	-0.61351	0.0196236	-0.330935	0.247789	-0.00957147	0.974094	0.31889	0.266455	-0.141003	0.630651	0.297917	0.300898	0.738645	0.00254914	-0.624208	0.017033	0.164324	0.574553	0.251676	0.385403	0.493307	0.0730513
GFM2	blue	-0.460608	0.0974232	-0.413411	0.141748	-0.123951	0.672896	-0.0677674	0.817948	-0.0607656	0.836513	0.0730743	0.803935	0.108791	0.711227	0.957557	7.6997e-08	-0.971128	7.85868e-09	0.294226	0.307213	0.29013	0.31431	-0.0373759	0.899058
EFR3A	blue	-0.460528	0.0974891	-0.134244	0.64728	-0.0920016	0.754427	0.0447751	0.879197	-0.242697	0.403136	-0.0250432	0.932278	-0.111523	0.704268	0.810742	0.000435367	-0.865806	6.27486e-05	0.352418	0.216526	0.0850497	0.772519	-0.169164	0.563174
STXBP6	blue	-0.46048	0.0975281	-0.0455612	0.87709	-0.478447	0.0835188	0.451736	0.104904	-0.0312198	0.915624	0.109589	0.709193	-0.350573	0.219109	0.306719	0.286142	-0.28291	0.327047	0.701998	0.00512963	-0.391364	0.166428	0.614804	0.0192953
CDC25C	blue	-0.460447	0.0975557	-0.336801	0.238995	-0.263787	0.362154	0.0928948	0.75211	-0.202832	0.48677	0.192542	0.509593	-0.00603223	0.983672	0.719741	0.00370439	-0.75381	0.00184618	0.238717	0.411131	0.3193	0.265806	-0.155757	0.59492
CCHCR1	blue	-0.460278	0.0976943	-0.799036	0.000607357	-0.457752	0.0997897	0.0647926	0.825825	-0.0454003	0.877521	0.0542235	0.853932	0.463843	0.0947905	0.490404	0.0750188	-0.357396	0.209652	-0.10797	0.713323	0.08739	0.766416	0.131165	0.654907
NOMO2	blue	-0.460209	0.0977518	0.00661263	0.982101	-0.208142	0.475187	0.293812	0.307928	-0.289001	0.316284	0.20786	0.475798	-0.427453	0.127375	0.658223	0.0104899	-0.729492	0.00306616	0.795163	0.000674953	-0.293818	0.307917	0.171912	0.556755
ZNF18	blue	-0.460148	0.0978016	-0.127703	0.663519	-0.432491	0.122467	0.306389	0.286688	-0.362572	0.202651	-0.177301	0.544259	7.50102e-05	0.999797	0.177967	0.542724	-0.135715	0.643648	-0.0245624	0.933576	-0.118512	0.686568	0.0342608	0.907436
MGME1	blue	-0.460129	0.0978171	0.322028	0.261512	-0.295601	0.304853	0.313531	0.275021	0.0171975	0.953469	-0.370823	0.191802	-0.472305	0.0881377	0.385635	0.173272	-0.449245	0.107073	0.31159	0.278164	0.329186	0.250449	0.1602	0.584322
MGAT2	blue	-0.459699	0.0981722	-0.124367	0.671855	-0.273619	0.343856	0.303496	0.291495	-0.752764	0.00188909	0.379388	0.180939	-0.212802	0.465129	0.459242	0.0985502	-0.533735	0.0493274	0.402927	0.153159	-0.362547	0.202686	-0.408133	0.14742
CCNB1	blue	-0.459602	0.0982525	-0.1135	0.699247	-0.294729	0.30635	0.153694	0.59987	-0.272204	0.346457	0.00511322	0.986159	-0.112727	0.70121	0.556838	0.0386064	-0.617499	0.0186251	0.0629624	0.83068	0.488283	0.0764795	-0.385085	0.173938
C6orf120	blue	-0.459562	0.098285	-0.515799	0.0590309	-0.164267	0.574686	-0.0334818	0.909533	-0.292861	0.309569	0.251745	0.385268	0.169369	0.562695	0.877238	3.774e-05	-0.890666	1.94106e-05	0.284689	0.323882	0.0355439	0.903984	-0.250067	0.38855
LIPE	blue	-0.459255	0.0985395	-0.32115	0.26289	-0.276128	0.33927	0.186641	0.522895	-0.167517	0.567036	0.344201	0.228178	-0.121208	0.679779	0.695254	0.00577163	-0.714631	0.00407816	0.623518	0.017192	-0.181802	0.533918	0.252	0.384771
ORC1	blue	-0.459226	0.098563	-0.289035	0.316224	-0.346308	0.225154	0.159853	0.585148	-0.135317	0.644629	0.0756843	0.797063	-0.0352006	0.904907	0.5657	0.0349886	-0.578223	0.0303117	0.116317	0.692112	0.450139	0.10629	-0.106932	0.715974
CACTIN	blue	-0.4591	0.0986678	-0.305828	0.287616	-0.488867	0.0760756	0.40803	0.147531	-0.416649	0.138342	0.466977	0.0922874	-0.168472	0.564794	0.353691	0.214756	-0.352804	0.215988	0.513454	0.0603943	-0.292625	0.309977	0.105747	0.719003
MEF2A	blue	-0.458977	0.09877	-0.016558	0.955197	-0.173507	0.553045	0.191428	0.512091	-0.172919	0.554411	-0.120192	0.682336	-0.250403	0.387891	0.611883	0.0200425	-0.639248	0.0138408	0.412992	0.142193	-0.0550512	0.851725	0.130222	0.657249
PKP2	blue	-0.458926	0.0988116	-0.0347076	0.906234	-0.222112	0.445349	0.234126	0.420453	-0.12644	0.666671	0.15677	0.592498	-0.330743	0.24808	0.668132	0.00900956	-0.723736	0.00343137	0.72378	0.00342845	-0.206187	0.479436	0.317884	0.268051
LAS1L	blue	-0.458879	0.0988509	-0.634914	0.0147093	-0.366232	0.197793	1.54488e-05	0.999958	-0.0103837	0.971896	-0.19288	0.508835	0.379464	0.180845	0.533044	0.0496779	-0.446711	0.109311	-0.272501	0.345911	0.423901	0.130913	-0.0914946	0.755742
ARL17A	blue	-0.458491	0.0991737	-0.0927199	0.752564	-0.216362	0.457516	0.154323	0.598358	0.150851	0.606713	-0.221024	0.447639	-0.234674	0.419334	0.695921	0.00570547	-0.696489	0.00564961	0.446955	0.109094	0.235813	0.417015	0.369501	0.193515
ISM1	blue	-0.458302	0.0993309	-0.550056	0.0415557	-0.34392	0.228583	0.0445776	0.879726	0.174558	0.550605	0.0396466	0.892956	0.201234	0.490282	0.726199	0.00327114	-0.652683	0.0113954	0.293081	0.309188	0.147268	0.615381	0.42391	0.130904
DCLRE1C	blue	-0.458279	0.09935	0.263379	0.362925	-0.374124	0.187567	0.418056	0.13688	-0.0871426	0.767061	-0.0729084	0.804372	-0.567203	0.0344007	0.324779	0.257227	-0.402085	0.1541	0.530145	0.0511695	0.107861	0.7136	0.24122	0.406094
RCC1	blue	-0.458092	0.0995059	-0.155716	0.59502	-0.356411	0.211002	0.212854	0.465017	-0.180228	0.537524	0.0853786	0.771661	-0.128217	0.662238	0.523414	0.054757	-0.564119	0.0356148	0.204823	0.482412	0.355348	0.212463	-0.154832	0.597137
RNF217	blue	-0.457717	0.0998189	-0.739711	0.0024937	-0.239696	0.409156	-0.144949	0.621018	0.0932807	0.75111	0.0138738	0.962455	0.453831	0.103102	0.890495	1.95858e-05	-0.814463	0.000389799	-0.00784412	0.978768	0.419263	0.135633	0.073824	0.801959
BIRC2	blue	-0.457437	0.100053	-0.109366	0.709761	-0.138156	0.637637	0.029244	0.920948	-0.146766	0.6166	-0.26016	0.369034	-0.0283772	0.923285	0.70995	0.00444591	-0.728077	0.00315295	0.0987717	0.736919	0.299624	0.298004	-0.144015	0.623292
DDX11	blue	-0.457301	0.100167	-0.200663	0.491541	-0.22735	0.434406	0.0736628	0.802384	-0.134401	0.64689	0.0738398	0.801918	-0.0604971	0.837227	0.761925	0.0015391	-0.807566	0.000477559	0.242993	0.402546	0.442465	0.113133	-0.154825	0.597154
KIF23	blue	-0.457001	0.100419	0.165003	0.57295	-0.279292	0.333536	0.315754	0.271448	-0.211247	0.468473	0.00832561	0.977465	-0.46609	0.092991	0.503653	0.0663368	-0.596532	0.0243329	0.452668	0.1041	0.243662	0.40121	-0.0607951	0.836435
R3HDM1	blue	0.456894	0.100508	-0.354188	0.214066	0.665559	0.00937739	-0.697177	0.00558251	0.434392	0.120649	0.636955	0.0142952	0.353307	0.215288	0.544327	0.0441732	-0.606604	0.0214475	0.283936	0.32522	0.238979	0.410603	-0.0115936	0.968623
DNMT3B	blue	-0.456717	0.100657	-0.7767	0.00108498	-0.296051	0.304081	-0.111126	0.70528	0.0542247	0.853929	0.0915486	0.755602	0.457523	0.0999807	0.825197	0.000279441	-0.750061	0.00200355	-0.0323882	0.912477	0.420879	0.133976	-0.0198229	0.946374
CDC14A	blue	-0.456178	0.10111	-0.359067	0.207376	-0.143895	0.623585	-0.0249443	0.932545	-0.188249	0.519255	-0.08474	0.773328	0.125982	0.667814	0.798573	0.00061515	-0.79831	0.000619598	0.0369053	0.900323	0.383234	0.176194	-0.239614	0.409323
HS6ST1	blue	-0.456037	0.101229	-0.442649	0.112965	-0.417859	0.137084	0.194235	0.505803	0.0115863	0.968643	0.0791156	0.788049	0.0860123	0.770008	0.479412	0.082809	-0.420183	0.134688	0.247274	0.394045	0.0147481	0.960091	0.251179	0.386374
TRIM8	blue	-0.456024	0.10124	-0.781752	0.000957044	-0.446856	0.109182	0.0844956	0.773966	0.0208396	0.943627	0.0832876	0.777123	0.399671	0.156823	0.525518	0.0536166	-0.394182	0.163128	0.0388439	0.895112	0.0208357	0.943638	0.295857	0.304413
ELP4	blue	-0.455965	0.10129	-0.378703	0.181793	-0.331565	0.246836	0.0404465	0.890808	-0.0448763	0.878925	-0.268215	0.353848	0.217118	0.455906	0.532004	0.0502092	-0.487786	0.076825	-0.181204	0.535287	0.448242	0.107954	-0.232328	0.424133
NSD2	blue	-0.455764	0.10146	-0.341116	0.23265	-0.231442	0.425953	0.040772	0.889934	-0.108759	0.711308	0.152429	0.602911	0.00655365	0.98226	0.804147	0.00052659	-0.83694	0.000189142	0.247547	0.393506	0.44169	0.11384	-0.119127	0.685017
MAD2L1	blue	-0.455739	0.101481	-0.402233	0.153935	-0.266987	0.356141	-0.0255247	0.930979	-0.0355863	0.90387	-0.0816808	0.781327	0.188788	0.518037	0.713312	0.00417923	-0.710543	0.00439793	-0.107424	0.714717	0.675219	0.00805385	-0.222459	0.444619
CERS4	blue	-0.455699	0.101515	-0.79293	0.000716587	-0.366666	0.197222	-0.0695286	0.813292	-0.0489565	0.868001	-0.182599	0.532093	0.596264	0.0244135	0.547066	0.0429075	-0.414646	0.140443	-0.409947	0.145454	0.354727	0.21332	-0.0782013	0.790449
ZNF7	blue	-0.455642	0.101563	-0.0869508	0.767561	-0.368753	0.194489	0.246991	0.394604	0.0999925	0.733774	-0.3013	0.295176	-0.152408	0.602961	0.430945	0.123959	-0.375985	0.185206	0.214743	0.460969	0.220708	0.448304	0.358317	0.208395
VRK2	blue	0.455456	0.101721	0.388484	0.169847	0.560084	0.0372509	-0.351678	0.21756	0.264554	0.360708	-0.0203269	0.945012	-0.12919	0.659813	-0.0901473	0.759242	-0.00408109	0.988953	-0.039667	0.892901	0.334221	0.242839	-0.207646	0.476262
IFIT3	blue	-0.455429	0.101743	-0.45651	0.100831	-0.498382	0.0696999	0.137462	0.639343	0.216973	0.456215	-0.593088	0.0253836	0.342767	0.230249	0.175426	0.548594	-0.0144748	0.96083	-0.42203	0.132804	0.307837	0.284299	0.322066	0.261453
NPR1	blue	-0.455301	0.101851	-0.615138	0.0192114	-0.405132	0.150711	0.0854666	0.771431	-0.343678	0.228931	0.170549	0.559936	0.340249	0.233917	0.479323	0.0828736	-0.430281	0.124604	-0.160002	0.584793	0.19974	0.493577	-0.390246	0.16775
ZNF70	blue	-0.455189	0.101947	-0.0732297	0.803525	-0.452757	0.104023	0.325125	0.256691	0.062473	0.831979	0.0942395	0.748627	-0.267741	0.354732	0.446187	0.109777	-0.450605	0.105884	0.542039	0.0452516	0.076439	0.795078	0.447525	0.108588
SLF1	blue	-0.45496	0.102141	-0.341841	0.231594	-0.320303	0.264223	0.0385115	0.896006	-0.135764	0.643526	-0.368218	0.195186	0.285864	0.321801	0.473044	0.0875726	-0.414916	0.140159	-0.319218	0.265935	0.415856	0.139172	-0.216417	0.457398
DONSON	blue	-0.454767	0.102305	0.0795881	0.78681	-0.302964	0.292384	0.279489	0.333182	-0.249461	0.389739	0.0467741	0.873842	-0.350192	0.219645	0.503341	0.0665326	-0.587386	0.0271971	0.32168	0.262058	0.344849	0.227245	-0.193545	0.507346
UHRF1	blue	-0.454681	0.102378	-0.205421	0.481106	-0.268141	0.353987	0.119562	0.683922	-0.149791	0.609274	0.135887	0.643223	-0.109362	0.70977	0.702556	0.00507919	-0.755726	0.00176964	0.272173	0.346514	0.438504	0.11678	-0.131134	0.654983
GNPNAT1	blue	-0.454208	0.102781	0.131012	0.655285	-0.161838	0.580433	0.165501	0.571776	-0.345523	0.226277	-0.09891	0.736563	-0.293718	0.308089	0.588021	0.0269903	-0.685598	0.00679798	0.247077	0.394433	0.219852	0.45011	-0.365868	0.198273
TRPC1	blue	-0.454093	0.102878	-0.719504	0.0037211	-0.244104	0.40033	-0.154489	0.59796	0.128656	0.661143	-0.219838	0.450141	0.51186	0.0613336	0.796699	0.000647468	-0.688733	0.0064504	-0.211403	0.468137	0.482609	0.0804868	0.00726414	0.980337
MRE11	blue	-0.453843	0.103092	-0.565415	0.0351008	-0.199356	0.494425	-0.126728	0.66595	0.106907	0.716036	-0.0598786	0.838871	0.293673	0.308167	0.904584	8.84533e-06	-0.861819	7.41295e-05	0.0384197	0.896252	0.544657	0.0440196	0.0524684	0.858616
GATAD2B	blue	-0.45368	0.103231	-0.275316	0.34075	-0.275794	0.339878	0.164267	0.574688	0.137422	0.639442	-0.114219	0.697425	-0.0909008	0.757284	0.576857	0.0307979	-0.537211	0.0475901	0.428569	0.126276	-0.0895387	0.760824	0.500431	0.0683783
MBOAT1	blue	-0.453522	0.103367	-0.661168	0.0100317	-0.283449	0.326087	-0.0408236	0.889796	0.060229	0.83794	0.0989323	0.736505	0.332009	0.246164	0.783459	0.000916647	-0.718139	0.00381852	0.133205	0.649848	0.245567	0.397423	0.125076	0.67008
NCOA3	blue	-0.453193	0.103649	-0.38198	0.177732	-0.127144	0.664913	0.014681	0.960272	-0.0546827	0.852707	0.126707	0.666002	-0.00259318	0.99298	0.907847	7.23111e-06	-0.911293	5.79728e-06	0.520541	0.056342	-0.0249635	0.932493	0.198567	0.496172
IL6ST	blue	-0.452984	0.103828	-0.438994	0.116324	-0.131819	0.653282	-0.0157047	0.957504	-0.0252669	0.931674	0.0557512	0.849859	0.0732862	0.803376	0.902555	9.99049e-06	-0.885279	2.55924e-05	0.43501	0.120062	0.000947646	0.997435	0.20604	0.479756
ANP32E	blue	-0.452708	0.104065	-0.56746	0.0343012	-0.300564	0.296416	-0.0491429	0.867503	0.179062	0.540203	-0.106053	0.718221	0.266934	0.35624	0.767693	0.00134668	-0.709189	0.00450802	-0.0357771	0.903357	0.66078	0.0100912	0.097798	0.73943
KIF11	blue	-0.452371	0.104355	-0.187407	0.521159	-0.231411	0.426016	0.0951124	0.746368	-0.105694	0.719139	0.0327555	0.911488	-0.10202	0.72856	0.709844	0.00445451	-0.758448	0.00166527	0.234809	0.419058	0.443338	0.112339	-0.166337	0.569808
LYPD6	blue	-0.451903	0.104759	-0.5163	0.0587427	-0.227699	0.433681	-0.0845085	0.773933	-0.0944451	0.748095	0.0708626	0.809769	0.296094	0.304009	0.820312	0.000326016	-0.806018	0.000499273	0.0460049	0.875902	0.372807	0.18925	-0.0978729	0.739237
NOTCH2NLA	blue	-0.451861	0.104796	-0.638154	0.0140561	-0.481841	0.0810403	0.158281	0.58889	0.167428	0.567244	0.0174033	0.952913	0.266627	0.356815	0.47587	0.0854358	-0.342237	0.231018	0.172202	0.556079	0.0211429	0.942808	0.53032	0.0510783
ZNF383	blue	0.45173	0.104908	-0.284382	0.324427	0.514634	0.0597054	-0.687988	0.00653168	0.802332	0.00055422	-0.00580617	0.984283	0.53663	0.0478774	0.242441	0.403649	-0.195658	0.50263	-0.310064	0.280648	0.733895	0.00280801	0.241824	0.404884
PARP4	blue	-0.451685	0.104948	0.101776	0.729188	-0.165712	0.57128	0.243043	0.402445	-0.503201	0.0666203	0.176042	0.547168	-0.381662	0.178123	0.598492	0.0237498	-0.715263	0.00403036	0.52099	0.0560925	-0.123927	0.672955	-0.341476	0.232124
NCEH1	blue	-0.45154	0.105073	0.193836	0.506697	-0.172361	0.555711	0.322613	0.260597	-0.579827	0.0297484	0.0359771	0.902819	-0.43611	0.119022	0.460893	0.0971889	-0.555399	0.039219	0.515237	0.0593557	-0.356207	0.211281	-0.225353	0.438562
FDX1	blue	-0.451232	0.105339	-0.758207	0.00167431	-0.442251	0.113328	-0.0105361	0.971484	0.0392543	0.89401	-0.140531	0.631807	0.554563	0.0395781	0.487089	0.0773111	-0.34718	0.22391	-0.362156	0.203209	0.413206	0.141967	0.00195665	0.994703
ZNF174	blue	0.451213	0.105356	-0.143218	0.625237	0.458107	0.0994936	-0.423131	0.131689	0.357032	0.21015	0.51921	0.0570879	0.166303	0.56989	0.0534851	0.855902	-0.0937564	0.749878	0.289646	0.315156	-0.178921	0.540527	0.127032	0.665192
PPP1R26	blue	-0.451087	0.105466	-0.523893	0.0544957	-0.418099	0.136835	0.211758	0.467373	-0.177695	0.543351	0.278283	0.335359	0.0974583	0.740306	0.499509	0.0689709	-0.441699	0.113832	0.352407	0.216542	-0.225848	0.437529	0.178926	0.540515
NDC80	blue	-0.450992	0.105548	0.133099	0.650112	-0.310758	0.279517	0.27214	0.346575	-0.217406	0.455294	-0.0720633	0.8066	-0.346423	0.22499	0.446176	0.109787	-0.530097	0.0511945	0.220878	0.447946	0.418784	0.136126	-0.226949	0.435238
CEP68	blue	-0.450762	0.105747	-0.702926	0.00504586	-0.377049	0.183865	0.0476003	0.87163	-0.292859	0.309573	0.0478734	0.870899	0.459235	0.0985557	0.438955	0.11636	-0.34563	0.226124	-0.237843	0.412898	0.0240007	0.935092	-0.197824	0.497818
WDR82	blue	-0.450562	0.105921	-0.317682	0.268371	-0.127228	0.664703	-0.0063629	0.982777	-0.225924	0.437372	-0.00516896	0.986008	0.0797105	0.786489	0.762144	0.00153143	-0.786805	0.000841447	0.185425	0.525656	0.0835361	0.776473	-0.178255	0.54206
ADAM10	blue	-0.450335	0.10612	-0.339386	0.23518	-0.106107	0.718083	0.00373173	0.989898	-0.127684	0.663565	0.157295	0.591245	-0.0350636	0.905276	0.926233	1.98154e-06	-0.957737	7.50962e-08	0.480712	0.0818589	0.0860058	0.770024	0.0212765	0.942447
SLC1A3	blue	-0.450293	0.106156	-0.670804	0.0086394	-0.349972	0.219954	0.0305092	0.917539	0.207994	0.475506	-0.0123408	0.966602	0.311005	0.279115	0.697412	0.00555981	-0.577754	0.0304782	0.209835	0.47152	0.1142	0.697472	0.487819	0.0768018
MEN1	blue	-0.45009	0.106333	-0.638226	0.0140418	-0.270442	0.349712	0.00209446	0.99433	-0.26536	0.359191	0.395708	0.161359	0.246407	0.395759	0.799241	0.000603946	-0.789377	0.000787042	0.250542	0.38762	0.084529	0.773879	-0.1497	0.609493
CENPU	blue	-0.449621	0.106743	0.176411	0.546314	-0.305675	0.287871	0.261843	0.365833	-0.194647	0.504885	-0.157063	0.591798	-0.334943	0.24176	0.416099	0.138917	-0.499047	0.0692689	0.154354	0.598284	0.463867	0.0947708	-0.209818	0.471558
UNK	blue	-0.449548	0.106807	-0.672376	0.0084273	-0.327667	0.252772	-0.0146946	0.960236	-0.0471885	0.872732	0.248103	0.392409	0.32558	0.255987	0.752651	0.00189377	-0.696007	0.00569703	0.141146	0.630301	0.22409	0.4412	0.0583709	0.842882
BAZ2A	blue	-0.449442	0.1069	-0.181276	0.535122	-0.312065	0.277393	0.271105	0.348485	-0.195698	0.502541	0.417783	0.137162	-0.270918	0.34883	0.649144	0.0120046	-0.69703	0.0055968	0.777246	0.00107052	-0.234437	0.419819	0.263072	0.363504
SMAD4	blue	-0.448989	0.107298	-0.57744	0.0305896	-0.137742	0.638653	-0.144747	0.621508	-0.0342719	0.907406	0.0215787	0.941631	0.320848	0.263365	0.946056	3.16538e-07	-0.9171	3.91185e-06	0.107115	0.715507	0.316038	0.270994	-0.0632561	0.8299
AARS	blue	-0.448763	0.107496	-0.721774	0.00356339	-0.184359	0.528081	-0.123201	0.674776	-0.15245	0.602859	0.176845	0.545311	0.37727	0.183588	0.893963	1.62719e-05	-0.86378	6.83389e-05	0.0614831	0.834607	0.266282	0.35746	-0.197321	0.498933
BORA	blue	-0.448551	0.107682	-0.407113	0.148533	-0.267461	0.355255	-0.0257753	0.930303	0.00422211	0.988571	0.0329714	0.910907	0.166387	0.569692	0.767057	0.00136691	-0.769207	0.00129952	0.0580556	0.843721	0.566344	0.034736	-0.124553	0.671389
ZFP62	blue	-0.448523	0.107707	-0.525328	0.053719	-0.14861	0.612129	-0.114863	0.695793	0.12283	0.675706	-0.0740402	0.80139	0.216344	0.457554	0.912589	5.32238e-06	-0.885651	2.51196e-05	0.129287	0.659572	0.448253	0.107945	0.0612992	0.835096
C1orf112	blue	-0.448165	0.108022	-0.586397	0.0275211	-0.168588	0.564524	-0.0902108	0.759077	0.0229094	0.938038	0.107822	0.713701	0.228581	0.431854	0.936369	8.34699e-07	-0.909675	6.43809e-06	0.20247	0.487566	0.375832	0.1854	0.0448833	0.878906
AGTR1	blue	-0.44813	0.108053	-0.597711	0.0239808	-0.352309	0.216678	0.0823623	0.779543	0.0193171	0.94774	0.272801	0.345359	0.18306	0.531041	0.717769	0.00384528	-0.659201	0.010336	0.346727	0.224554	0.10527	0.720226	0.324801	0.257192
MLKL	blue	-0.4481	0.10808	-0.261632	0.366234	-0.42293	0.131892	0.23061	0.427664	-0.0873556	0.766506	0.0591692	0.840758	-0.0637835	0.828501	0.449885	0.106513	-0.445899	0.110035	0.208526	0.474354	0.267724	0.354765	-0.0242343	0.934461
VPS52	blue	-0.447362	0.108733	-0.660457	0.0101409	-0.163524	0.576442	-0.129219	0.659742	-0.0779596	0.791083	0.0840839	0.775042	0.336484	0.239465	0.900916	1.10021e-05	-0.870677	5.08211e-05	0.0761871	0.795741	0.279457	0.333239	-0.197237	0.49912
DLX2	blue	-0.447185	0.10889	-0.546996	0.0429392	-0.413916	0.141214	0.121117	0.680008	0.290014	0.314513	-0.030502	0.917558	0.171921	0.556734	0.582741	0.0287447	-0.472609	0.0879053	0.265533	0.358866	0.150513	0.607529	0.620235	0.0179628
DNAJC18	blue	-0.447179	0.108895	-0.370584	0.192111	-0.251207	0.386318	0.0911204	0.756714	0.122045	0.677677	-0.255843	0.377316	0.0824144	0.779407	0.572503	0.0323864	-0.492851	0.0733579	0.173317	0.553486	0.0350608	0.905283	0.450492	0.105983
PAMR1	blue	-0.447072	0.10899	-0.312879	0.276074	-0.496153	0.0711581	0.400681	0.15568	-0.166457	0.569527	0.129157	0.659896	-0.105395	0.719904	0.269433	0.351582	-0.200331	0.492273	0.403842	0.15214	-0.290889	0.312989	0.395777	0.161279
MOCS3	blue	-0.446648	0.109367	-0.806015	0.000499325	-0.25032	0.388053	-0.115071	0.695266	-0.111106	0.705331	0.111457	0.704436	0.500638	0.0682464	0.780798	0.000980223	-0.69383	0.00591484	-0.0516635	0.860765	0.150167	0.608364	-0.0917112	0.75518
TAF5L	blue	-0.446254	0.109718	-0.0400798	0.891793	-0.177278	0.544312	0.194375	0.505491	-0.509585	0.0626926	0.279643	0.332904	-0.264601	0.360618	0.633881	0.0149223	-0.734056	0.00279891	0.470312	0.0896741	-0.114094	0.697741	-0.341604	0.231938
LIPT2	blue	0.446031	0.109917	-0.680355	0.00741174	0.353059	0.215633	-0.550852	0.0412016	0.311107	0.278949	0.522025	0.0555195	0.740453	0.00245567	0.00444425	0.98797	0.0810503	0.782978	-0.234798	0.419082	-0.0780173	0.790932	0.00360448	0.990243
TOR3A	blue	-0.445907	0.110027	-0.265966	0.358054	-0.461389	0.0967827	0.228463	0.432097	-0.402454	0.153688	-0.168711	0.564235	0.133892	0.648148	0.139584	0.634128	-0.112464	0.701878	-0.413806	0.14133	0.343721	0.22887	-0.568591	0.0338646
CEP128	blue	-0.445897	0.110037	-0.191231	0.512535	-0.22102	0.447647	0.0916295	0.755392	-0.19686	0.499957	0.0195971	0.946984	-0.0907871	0.757579	0.68437	0.00693806	-0.732245	0.0029027	0.159003	0.587171	0.467919	0.0915435	-0.213495	0.463642
PATL1	blue	0.445857	0.110072	-0.528986	0.0517748	0.656932	0.0106957	-0.730921	0.00298044	0.371264	0.191234	0.598132	0.0238561	0.496662	0.0708233	0.539704	0.0463721	-0.562361	0.0363208	0.176875	0.545244	0.127686	0.663559	-0.0293989	0.920531
COL6A2	blue	-0.445598	0.110304	-0.337368	0.238155	-0.561842	0.0365314	0.388415	0.169929	-0.108084	0.713032	0.270383	0.349821	-0.107232	0.715206	0.294128	0.307383	-0.246699	0.395181	0.401867	0.154345	-0.0479571	0.870675	0.35439	0.213787
METTL25	blue	-0.445593	0.110308	-0.042853	0.88435	-0.250495	0.387711	0.132568	0.651426	-0.224094	0.441192	-0.193134	0.508267	-0.0828895	0.778164	0.477149	0.0844804	-0.51052	0.062131	0.0844973	0.773962	0.141374	0.629744	-0.291987	0.311081
FDXACB1	blue	-0.445502	0.11039	-0.694062	0.00589138	-0.232641	0.423492	-0.121327	0.679481	-0.13539	0.644449	0.00642631	0.982605	0.486669	0.077605	0.759869	0.00161276	-0.688628	0.00646178	-0.13808	0.637822	0.240466	0.407607	-0.221876	0.445844
NEMP1	blue	-0.445479	0.110411	-0.485692	0.0782918	-0.143222	0.625228	-0.0666112	0.821008	-0.0386132	0.895732	0.0461206	0.875591	0.1453	0.620164	0.891187	1.88836e-05	-0.884082	2.71644e-05	0.174927	0.54975	0.384186	0.175031	-0.0430449	0.883835
MCM2	blue	-0.445335	0.110539	-0.539105	0.0466626	-0.231839	0.425136	-0.0771346	0.79325	0.000292289	0.999209	0.0605492	0.837089	0.255925	0.377157	0.831416	0.000228089	-0.817395	0.000356674	0.0283718	0.9233	0.552118	0.0406422	-0.101182	0.730714
HMMR	blue	-0.445282	0.110587	-0.0186486	0.949547	-0.251853	0.385058	0.183831	0.529283	-0.221647	0.446326	-0.00669435	0.98188	-0.237331	0.413933	0.554931	0.0394197	-0.631939	0.0153292	0.208341	0.474754	0.398524	0.158126	-0.276147	0.339235
MRAP2	blue	-0.444859	0.110966	0.197505	0.498524	-0.317141	0.269232	0.293648	0.308211	-0.375238	0.186152	-0.0624807	0.831958	-0.320055	0.264614	0.377155	0.183733	-0.457033	0.100391	0.180869	0.536054	0.271125	0.348448	-0.314353	0.273697
ATF6	blue	-0.444705	0.111105	-0.23608	0.416472	-0.1545	0.597933	0.0907456	0.757687	0.0167543	0.954667	0.119112	0.685055	-0.173851	0.552245	0.853082	0.000104988	-0.882426	2.9467e-05	0.620377	0.017929	0.0677575	0.817974	0.260955	0.367521
SKIV2L	blue	-0.444506	0.111284	-0.719072	0.00375174	-0.408701	0.146803	0.0979109	0.739139	-0.189032	0.517487	0.210388	0.470327	0.357682	0.209262	0.537413	0.0474907	-0.437202	0.117996	0.0669479	0.820116	-0.0493767	0.866877	0.0718728	0.807103
DEPDC1	blue	-0.444281	0.111487	-0.249442	0.389775	-0.180823	0.536158	0.017042	0.953889	-0.132891	0.650626	0.068961	0.814792	-0.0159575	0.956821	0.790351	0.000767215	-0.842184	0.000157329	0.200424	0.492069	0.455041	0.102072	-0.21137	0.468208
INTS5	blue	-0.443497	0.112196	-0.727543	0.0031862	-0.300907	0.295838	-0.012422	0.966382	-0.229768	0.429401	0.0336469	0.909088	0.458224	0.099396	0.574822	0.031533	-0.480053	0.0823392	-0.129914	0.658013	-0.0145861	0.960529	-0.106163	0.717939
STEAP1	blue	-0.443494	0.112198	-0.505337	0.065287	-0.293499	0.308467	-0.0799353	0.7859	-0.0428573	0.884338	-0.256797	0.375477	0.41288	0.142312	0.595829	0.0245446	-0.533404	0.0494948	-0.398368	0.158305	0.643635	0.013002	-0.304758	0.289393
MIA2	blue	-0.443385	0.112297	-0.418052	0.136884	-0.157526	0.590692	-0.0211737	0.942725	0.159414	0.586191	-0.074955	0.798982	0.0740466	0.801373	0.876785	3.85429e-05	-0.839056	0.000175734	0.372713	0.18937	0.18626	0.523759	0.30225	0.293581
COBLL1	blue	-0.443293	0.11238	0.334647	0.242201	-0.255494	0.37799	0.398323	0.158355	-0.108536	0.711878	-0.0756108	0.797256	-0.633772	0.0149448	0.43402	0.121003	-0.513746	0.0602233	0.761821	0.00154277	-0.190285	0.514663	0.391236	0.166579
PMF1	blue	-0.443162	0.112499	-0.478227	0.0836812	-0.51105	0.061815	0.136881	0.640773	-0.0195796	0.947031	-0.49731	0.0703988	0.416818	0.138166	0.1383	0.637281	0.0118478	0.967935	-0.585149	0.0279344	0.39956	0.156948	0.0261301	0.929345
PTPDC1	blue	0.442636	0.112977	-0.304829	0.289274	0.585428	0.0278414	-0.634981	0.0146955	0.441019	0.114454	-0.0028269	0.992348	0.491483	0.0742834	0.129901	0.658047	-0.100421	0.732671	-0.397334	0.159486	0.406762	0.148918	-0.208925	0.473488
GID4	blue	-0.442318	0.113266	-0.759289	0.00163402	-0.171067	0.558726	-0.148417	0.612597	-0.0242372	0.934453	0.065399	0.824219	0.412897	0.142294	0.882428	2.94645e-05	-0.815375	0.000379241	0.0657179	0.823374	0.17641	0.546318	0.0066044	0.982123
PTBP3	blue	0.442312	0.113272	-0.550012	0.0415754	0.704857	0.00487494	-0.786315	0.000852137	0.316004	0.271049	0.373161	0.188797	0.635028	0.014686	0.492977	0.0732728	-0.483113	0.0801247	-0.113512	0.699218	0.183538	0.529951	-0.170393	0.560299
ATRN	blue	-0.44206	0.113501	0.187321	0.521353	-0.309913	0.280896	0.473703	0.0870709	-0.288783	0.316666	0.192797	0.509021	-0.632379	0.0152363	0.415385	0.139666	-0.489674	0.0755194	0.871615	4.87523e-05	-0.364302	0.200345	0.286806	0.320139
SPTLC3	blue	-0.44204	0.11352	-0.413212	0.14196	-0.278773	0.334474	0.0428324	0.884405	-0.237589	0.413412	0.088704	0.762995	0.204507	0.483102	0.580926	0.0293667	-0.564059	0.0356387	0.12626	0.667121	-0.079056	0.788205	-0.144134	0.623002
TMPO-AS1	blue	-0.441635	0.11389	-0.086681	0.768264	-0.315632	0.271643	0.212437	0.465914	-0.193876	0.506606	-0.0165923	0.955105	-0.192813	0.508984	0.503462	0.0664567	-0.544601	0.0440456	0.149785	0.609287	0.455716	0.1015	-0.184236	0.528361
TSPYL4	blue	-0.44148	0.114032	-0.385222	0.173772	-0.0704152	0.81095	-0.0602018	0.838012	-0.17911	0.540093	0.0772196	0.793027	0.0943973	0.748218	0.910591	6.06864e-06	-0.929379	1.53619e-06	0.310946	0.279212	0.0781267	0.790644	-0.105235	0.720315
MTR	blue	-0.440972	0.114498	-0.386747	0.171929	-0.140158	0.632722	0.0246323	0.933387	-0.101213	0.730634	0.231888	0.425035	-0.0456135	0.87695	0.898781	1.2444e-05	-0.927105	1.84867e-06	0.514336	0.0598786	0.0937371	0.749928	0.0812682	0.782407
TOMM20	blue	0.440871	0.114591	-0.441358	0.114144	0.607845	0.0211107	-0.716728	0.00392137	0.667736	0.00906531	0.022043	0.940377	0.587817	0.0270566	0.323331	0.259477	-0.259137	0.370987	-0.189476	0.516485	0.303981	0.290686	0.197575	0.49837
SNX27	blue	-0.440856	0.114604	-0.635352	0.0146197	-0.216679	0.456841	-0.0850401	0.772544	0.200562	0.491765	0.0728737	0.804464	0.261046	0.367346	0.910922	5.93913e-06	-0.846927	0.000132431	0.302931	0.29244	0.240317	0.407907	0.366293	0.197712
FLT1	blue	-0.440792	0.114663	-0.756294	0.00174745	-0.17485	0.549928	-0.146888	0.616304	0.0372423	0.899417	0.12	0.682818	0.385315	0.173659	0.947529	2.68947e-07	-0.886312	2.42974e-05	0.169372	0.562686	0.217149	0.45584	0.0917697	0.755028
VWF	blue	0.440542	0.114893	-0.411824	0.143438	0.476508	0.0849578	-0.552108	0.0406468	0.697223	0.00557811	0.53773	0.0473347	0.352926	0.215818	0.350952	0.218578	-0.328207	0.251944	0.338627	0.236297	0.142677	0.626556	0.517287	0.0581777
CSNK1G3	blue	-0.440337	0.115082	-0.35168	0.217558	-0.104687	0.721718	-0.04057	0.890476	-0.0302232	0.918309	0.0803121	0.784912	0.0303546	0.917955	0.935587	8.96628e-07	-0.953958	1.24506e-07	0.421658	0.133182	0.157237	0.591381	0.0539795	0.854583
ASTE1	blue	-0.439474	0.115879	-0.664864	0.00947868	-0.436435	0.118716	-0.00194273	0.994741	0.0456089	0.876962	-0.307236	0.28529	0.556047	0.0389425	0.386181	0.172612	-0.236344	0.415937	-0.48954	0.0756114	0.43569	0.119418	0.014723	0.960159
RAD54L	blue	-0.439133	0.116195	-0.0952109	0.746113	-0.2549	0.379138	0.123035	0.675193	-0.0443296	0.88039	-0.0769177	0.79382	-0.146651	0.61688	0.620219	0.0179666	-0.665502	0.00938557	0.160101	0.584558	0.560891	0.0369192	-0.0859088	0.770278
USP30	blue	-0.43903	0.11629	-0.515342	0.0592945	-0.18347	0.530106	-0.105073	0.720728	0.0812314	0.782503	-0.0623228	0.832377	0.295578	0.304892	0.850671	0.000115125	-0.80174	0.000563476	0.141095	0.630426	0.240434	0.407672	0.173841	0.552268
PAXBP1	blue	0.438943	0.116371	0.353095	0.215583	0.486511	0.0777154	-0.298354	0.300155	0.39106	0.166787	0.154313	0.598383	-0.17828	0.542002	-0.039042	0.89458	-0.0479226	0.870767	0.240714	0.40711	0.163265	0.577056	0.186298	0.523673
KLK6	blue	-0.438834	0.116472	-0.83244	0.000220416	-0.291852	0.311317	-0.0921829	0.753956	-0.105155	0.720519	0.0186757	0.949474	0.53739	0.0475019	0.668107	0.00901302	-0.563818	0.0357351	-0.183943	0.529028	0.177612	0.543542	-0.118348	0.686983
ACADM	blue	-0.438646	0.116647	-0.431692	0.123236	-0.25607	0.376878	-0.106321	0.717534	0.128566	0.661368	-0.337958	0.237283	0.328184	0.25198	0.683267	0.00706581	-0.633644	0.0149715	-0.295751	0.304596	0.760659	0.00158412	-0.146355	0.617597
IPP	blue	-0.438607	0.116684	0.144509	0.622088	-0.270552	0.349507	0.326942	0.253886	-0.18269	0.531886	0.121777	0.67835	-0.488173	0.0765561	0.522945	0.0550134	-0.611327	0.020187	0.663257	0.00971613	-0.0124037	0.966431	0.102572	0.727143
C3orf58	blue	-0.438417	0.11686	-0.00656984	0.982217	-0.118131	0.68753	0.104623	0.721882	-0.195662	0.502621	-0.0232446	0.937133	-0.226555	0.436056	0.730252	0.00302031	-0.798831	0.00061079	0.450288	0.106161	0.0621714	0.832779	-0.0342089	0.907576
DCAF10	blue	0.438173	0.117087	-0.477693	0.0840763	0.682075	0.00720583	-0.756069	0.00175622	0.388918	0.169328	0.508311	0.0634624	0.523426	0.0547504	0.559932	0.0373137	-0.583775	0.0283945	0.114854	0.695815	0.193121	0.508295	-0.0661081	0.82234
KLF11	blue	-0.437763	0.11747	-0.809563	0.000450655	-0.226471	0.436231	-0.17048	0.560097	0.0985478	0.737496	0.0172805	0.953245	0.519064	0.0571702	0.873477	4.48493e-05	-0.779225	0.00101942	-0.0471359	0.872873	0.372707	0.189378	0.0878732	0.765158
STAG2	blue	-0.437506	0.117711	-0.513565	0.0603289	-0.121062	0.680148	-0.159275	0.586521	0.0116792	0.968391	-0.115258	0.694792	0.290624	0.313449	0.872183	4.75337e-05	-0.849472	0.000120452	0.00580744	0.98428	0.380592	0.179444	-0.127484	0.664064
GYS1	blue	-0.437344	0.117862	-0.256761	0.375546	-0.288994	0.316296	0.280835	0.330759	-0.478973	0.0831308	0.512873	0.0607352	-0.220772	0.448169	0.564229	0.0355711	-0.623824	0.0171213	0.611394	0.0201697	-0.291214	0.312423	-0.146802	0.616513
RGL1	blue	-0.437192	0.118005	0.100636	0.732119	-0.167434	0.567231	0.237935	0.412711	-0.402	0.154196	0.192781	0.509057	-0.403422	0.152608	0.637046	0.0142769	-0.749327	0.00203556	0.561997	0.0364685	0.00799288	0.978365	-0.190497	0.514184
ITGAV	blue	-0.437075	0.118114	0.230312	0.428277	-0.152068	0.603779	0.275248	0.340875	-0.278672	0.334656	-0.248695	0.391245	-0.420004	0.134871	0.454818	0.102261	-0.511109	0.0617797	0.444981	0.110857	-0.199183	0.494808	0.0789757	0.788416
FUT11	blue	-0.436926	0.118254	0.246822	0.394938	-0.288336	0.317449	0.425715	0.129098	-0.470462	0.0895582	0.213194	0.464287	-0.577705	0.0304953	0.39923	0.157323	-0.511526	0.0615317	0.663493	0.00968097	-0.203085	0.486217	-0.0879154	0.765048
NECAP1	blue	0.436724	0.118444	-0.305812	0.287644	0.71533	0.00402534	-0.700945	0.00522608	0.278498	0.33497	0.4097	0.145721	0.417642	0.137309	0.474578	0.0864079	-0.515634	0.0591258	0.117855	0.688226	0.0417225	0.887383	-0.0907027	0.757799
MELK	blue	-0.436609	0.118552	0.180428	0.537064	-0.308644	0.282973	0.295794	0.304521	-0.279821	0.332584	-0.112669	0.701356	-0.358339	0.208365	0.345049	0.226957	-0.431925	0.123011	0.138985	0.635599	0.38557	0.173351	-0.31811	0.267692
XBP1	blue	-0.436475	0.118678	-0.402192	0.153981	-0.32158	0.262215	0.110213	0.707602	-0.121098	0.680058	0.123507	0.674008	0.127526	0.663959	0.60849	0.0209374	-0.576713	0.0308497	0.27491	0.341492	-0.00551724	0.985065	0.0423219	0.885775
TMEM117	blue	-0.436388	0.118759	-0.248118	0.392381	-0.21724	0.455647	0.0737795	0.802077	0.0595478	0.839751	-0.103966	0.723567	-0.0220371	0.940393	0.65868	0.0104178	-0.639239	0.0138425	0.346306	0.225156	0.0389898	0.89472	0.268404	0.353497
TCAF1P1	blue	-0.435902	0.119218	-0.218763	0.452415	-0.278324	0.335284	0.291541	0.311856	-0.427504	0.127325	0.509937	0.0624808	-0.252919	0.38298	0.597733	0.0239745	-0.653741	0.0112179	0.743159	0.00232091	-0.41702	0.137956	0.0132138	0.96424
AL139005.1	blue	-0.435671	0.119436	-0.829353	0.0002442	-0.371591	0.190811	-0.0546582	0.852773	0.122876	0.675592	-0.102216	0.728056	0.55509	0.0393516	0.581619	0.0291279	-0.432222	0.122725	-0.177571	0.543636	0.198447	0.496437	0.213532	0.463563
NEK2	blue	-0.435583	0.11952	-0.351248	0.218162	-0.23444	0.419812	0.0110589	0.970069	-0.029707	0.919701	-0.00819162	0.977828	0.0873577	0.7665	0.712392	0.00425094	-0.725013	0.00334756	0.0643957	0.826878	0.52973	0.0513857	-0.115095	0.695206
ARAP1	blue	-0.435583	0.11952	-0.667577	0.0090879	-0.403893	0.152083	0.105488	0.719666	0.0342379	0.907498	0.189468	0.516502	0.254142	0.380606	0.560557	0.0370561	-0.46193	0.0963413	0.2562	0.376627	-0.0762543	0.795564	0.430117	0.124763
HLTF	blue	-0.435144	0.119935	-0.141165	0.630255	-0.16666	0.569049	0.105531	0.719557	0.00165078	0.995531	0.114186	0.697509	-0.214576	0.461327	0.816019	0.000371932	-0.858714	8.4107e-05	0.628299	0.0161144	0.0865281	0.768662	0.256968	0.375148
RFK	blue	-0.43514	0.119939	-0.020267	0.945174	-0.221326	0.447001	0.0642142	0.827359	-0.157213	0.59144	-0.557558	0.0383028	0.0590573	0.841056	0.352027	0.217072	-0.348825	0.221575	-0.290737	0.313254	0.30303	0.292275	-0.310402	0.280097
KIF2C	blue	-0.434784	0.120277	-0.272125	0.346602	-0.278464	0.335031	0.112128	0.702732	-0.155943	0.594477	0.141902	0.628451	-0.0548506	0.852259	0.633938	0.0149104	-0.673134	0.00832635	0.19051	0.514154	0.414057	0.141065	-0.173235	0.553677
SC5D	blue	-0.434778	0.120282	-0.315263	0.272234	-0.168881	0.563837	0.00275427	0.992544	0.217153	0.455831	-0.273924	0.343296	0.0625686	0.831725	0.740946	0.00243067	-0.687021	0.00663841	0.278215	0.335483	0.12802	0.662728	0.444899	0.110931
ZNF620	blue	-0.43459	0.120461	0.0173167	0.953146	-0.230178	0.428554	0.0993602	0.735402	-0.0694017	0.813627	-0.251185	0.386361	-0.111797	0.703572	0.547454	0.0427304	-0.585886	0.0276897	0.0480281	0.870485	0.490624	0.0748684	-0.0806739	0.783964
SULT1C4	blue	-0.43426	0.120774	-0.72456	0.00337707	-0.21982	0.450178	-0.0950257	0.746592	0.00891814	0.975862	0.0307739	0.916826	0.42532	0.129492	0.787457	0.000827379	-0.695573	0.00573998	0.0987055	0.73709	0.0335038	0.909474	0.13616	0.642549
RAVER2	blue	-0.434105	0.120922	-0.803873	0.000530691	-0.251971	0.384827	-0.16164	0.580904	0.202079	0.488425	-0.0476575	0.871477	0.505043	0.0654694	0.8374	0.00018616	-0.732115	0.0029102	-0.0686141	0.815709	0.441898	0.11365	0.154581	0.597739
FAM57A	blue	-0.433766	0.121246	-0.652566	0.0114151	-0.220443	0.448864	-0.131299	0.654572	-0.156755	0.592534	-0.0298644	0.919276	0.4632	0.0953094	0.747155	0.00213269	-0.691616	0.00614301	-0.23688	0.414849	0.439807	0.115571	-0.287233	0.319386
LUZP1	blue	0.433599	0.121405	0.409722	0.145697	0.544056	0.0442999	-0.309231	0.282012	0.325165	0.256629	0.0747146	0.799615	-0.228227	0.432587	-0.0444172	0.880156	-0.0676864	0.818162	0.225313	0.438644	0.118027	0.687793	0.0790184	0.788304
CCDC82	blue	0.433497	0.121502	0.210409	0.47028	0.573154	0.032145	-0.444527	0.111265	0.407831	0.147748	-0.00586059	0.984136	0.00765028	0.979292	0.0936612	0.750124	-0.160123	0.584506	-0.0130687	0.964633	0.420228	0.134642	-0.0584978	0.842544
HACD4	blue	-0.433497	0.121503	0.0885933	0.763283	-0.360732	0.205123	0.340538	0.233493	-0.334913	0.241804	-0.15172	0.604619	-0.318866	0.266492	0.217942	0.454157	-0.254214	0.380467	0.0613275	0.835021	0.240597	0.407344	-0.253373	0.382097
FBXO17	blue	-0.433201	0.121786	-0.830245	0.00023712	-0.342685	0.230368	-0.0626676	0.831462	0.0918103	0.754923	0.121514	0.67901	0.480318	0.0821457	0.724219	0.00339947	-0.615341	0.0191605	0.0112977	0.969423	0.253013	0.382798	0.178056	0.542519
PRKAA2	blue	-0.43317	0.121816	-0.613222	0.0196973	-0.257001	0.375085	-0.0521924	0.859353	-0.127737	0.663433	-0.038955	0.894814	0.367708	0.195853	0.676354	0.00790839	-0.613381	0.0196567	-0.12878	0.660834	0.33362	0.24374	-0.0899136	0.759849
SUSD4	blue	-0.432868	0.122105	-0.574442	0.0316715	-0.323638	0.258999	0.0289139	0.921838	0.326381	0.254751	-0.138408	0.637016	0.242556	0.403418	0.653297	0.0112922	-0.534356	0.0490136	0.235604	0.417439	0.0883103	0.764019	0.631629	0.0153949
DYNC2H1	blue	-0.432705	0.122262	-0.279616	0.332952	-0.467521	0.0918574	0.204611	0.482875	0.304504	0.289815	-0.236746	0.415119	0.0110903	0.969984	0.420778	0.134079	-0.338906	0.235887	0.101823	0.729066	0.505784	0.0650105	0.498234	0.0697961
WDFY3	blue	-0.432674	0.122292	0.508628	0.0632703	-0.234484	0.419721	0.44294	0.1127	-0.272808	0.345346	-0.175666	0.548037	-0.698835	0.00542343	0.299241	0.298651	-0.410092	0.145298	0.628963	0.0159689	-0.188728	0.518171	0.16946	0.562481
[truncated: 11,054 more rows]
