# Supplementary material for: Wnt signaling mediates acquisition of blood–brain barrier properties in naïve endothelium derived from human pluripotent stem cells
Source: eLife. 2021 Nov 10;10:e70992. doi: 10.7554/eLife.70992 (PMC8664294; doi:10.7554/eLife.70992)
Supplement: Supplementary file 5. — (A–C) Enriched gene sets from the Hallmark gene set collection are shown. For each gene set, the total number of genes in the gene set (K), the number of genes enriched in a given comparison (k), the enrichment ratio (k/K), and the false discovery rate (FDR) are shown. (A) Passage 1 CHIR-treated ECs versus Passage 1 DMSO-treated ECs. (B) Passage 3 CHIR-treated ECs versus Passage 3 DMSO-treated ECs. (C) Adult mouse pituitary ECs with β-catenin-stabilization versus controls (Wang et al., 2019). [file elife-70992-supp5.xlsx]

## Sheet: (A) Passage 1
Hallmarks
Gene Set Name	# Genes in Gene Set (K)	# Genes in Overlap (k)	k/K	FDR
CHOLESTEROL HOMEOSTASIS	74	19	0.2568	5.03e-11
MTORC1 SIGNALING	200	34	0.17	1.61e-13
WNT BETA CATENIN SIGNALING	42	7	0.1667	0.000625
NOTCH SIGNALING	32	5	0.1562	0.00496
PI3K AKT MTOR SIGNALING	105	16	0.1524	1.12e-06
REACTIVE OXYGEN SPECIES PATHWAY	49	7	0.1429	0.00153
MITOTIC SPINDLE	199	28	0.1407	1.3e-09
TNFA SIGNALING VIA NFKB	200	28	0.14	1.3e-09
MYC TARGETS V2	58	8	0.1379	0.000892
OXIDATIVE PHOSPHORYLATION	200	27	0.135	5.13e-09
ESTROGEN RESPONSE EARLY	200	26	0.13	2.02e-08
COMPLEMENT	200	25	0.125	6.83e-08
INFLAMMATORY RESPONSE	200	25	0.125	6.83e-08
BILE ACID METABOLISM	112	14	0.125	4.27e-05
PROTEIN SECRETION	96	12	0.125	0.00014
APOPTOSIS	161	20	0.1242	1.15e-06
FATTY ACID METABOLISM	158	19	0.1203	3.27e-06
ADIPOGENESIS	200	24	0.12	1.97e-07
MYOGENESIS	200	24	0.12	1.97e-07
P53 PATHWAY	200	24	0.12	1.97e-07
XENOBIOTIC METABOLISM	200	24	0.12	1.97e-07
ANDROGEN RESPONSE	100	12	0.12	0.00019
IL2 STAT5 SIGNALING	199	23	0.1156	6.84e-07
UV RESPONSE UP	158	18	0.1139	1.28e-05
UV RESPONSE DN	144	16	0.1111	4.76e-05
ANGIOGENESIS	36	4	0.1111	0.0347
HEDGEHOG SIGNALING	36	4	0.1111	0.0347
HEME METABOLISM	200	22	0.11	2.4e-06
SPERMATOGENESIS	135	14	0.1037	0.000237
APICAL JUNCTION	200	20	0.1	2.56e-05
ESTROGEN RESPONSE LATE	200	20	0.1	2.56e-05
UNFOLDED PROTEIN RESPONSE	113	11	0.0973	0.00178
EPITHELIAL MESENCHYMAL TRANSITION	200	19	0.095	7.19e-05
HYPOXIA	200	19	0.095	7.19e-05
GLYCOLYSIS	200	18	0.09	0.00019
KRAS SIGNALING UP	200	18	0.09	0.00019
MYC TARGETS V1	200	18	0.09	0.00019
PEROXISOME	104	9	0.0865	0.0091
IL6 JAK STAT3 SIGNALING	87	7	0.0805	0.0298
ALLOGRAFT REJECTION	200	15	0.075	0.00361
G2M CHECKPOINT	200	14	0.07	0.00832
INTERFERON GAMMA RESPONSE	200	14	0.07	0.00832
E2F TARGETS	200	12	0.06	0.0374

## Sheet: (B) Passage 3
Hallmarks
Gene Set Name	# Genes in Gene Set (K)	# Genes in Overlap (k)	k/K	FDR
PANCREAS BETA CELLS	40	4	0.1	0.00411
WNT BETA CATENIN SIGNALING	42	4	0.0952	0.00464
KRAS SIGNALING UP	200	19	0.095	1.92e-10
NOTCH SIGNALING	32	3	0.0938	0.0164
EPITHELIAL MESENCHYMAL TRANSITION	200	17	0.085	7.53e-09
ANGIOGENESIS	36	3	0.0833	0.0216
INTERFERON ALPHA RESPONSE	97	8	0.0825	0.000125
TNFA SIGNALING VIA NFKB	200	16	0.08	4.05e-08
INFLAMMATORY RESPONSE	200	15	0.075	2.29e-07
INTERFERON GAMMA RESPONSE	200	14	0.07	1.29e-06
MYOGENESIS	200	12	0.06	3.62e-05
P53 PATHWAY	200	12	0.06	3.62e-05
IL6 JAK STAT3 SIGNALING	87	5	0.0575	0.0103
APOPTOSIS	161	9	0.0559	0.000591
ALLOGRAFT REJECTION	200	11	0.055	0.000156
UV RESPONSE UP	158	8	0.0506	0.0023
IL2 STAT5 SIGNALING	199	10	0.0503	0.000591
KRAS SIGNALING DN	200	10	0.05	0.000591
XENOBIOTIC METABOLISM	200	9	0.045	0.00232
BILE ACID METABOLISM	112	5	0.0446	0.024
FATTY ACID METABOLISM	158	7	0.0443	0.00815
SPERMATOGENESIS	135	5	0.037	0.0478
APICAL JUNCTION	200	7	0.035	0.0233

## Sheet: (C) Pituitary EC
Hallmarks
Gene Set Name	# Genes in Gene Set (K)	# Genes in Overlap (k)	k/K	FDR
IL6 JAK STAT3 SIGNALING	87	17	0.1954	1.5e-12
ALLOGRAFT REJECTION	200	39	0.195	2e-27
INFLAMMATORY RESPONSE	200	34	0.17	4.18e-22
INTERFERON GAMMA RESPONSE	200	31	0.155	4.27e-19
WNT BETA CATENIN SIGNALING	42	6	0.1429	0.000241
COMPLEMENT	200	25	0.125	2.05e-13
TNFA SIGNALING VIA NFKB	200	25	0.125	2.05e-13
INTERFERON ALPHA RESPONSE	97	12	0.1237	5.8e-07
KRAS SIGNALING UP	200	23	0.115	9.52e-12
ANGIOGENESIS	36	4	0.1111	0.00651
EPITHELIAL MESENCHYMAL TRANSITION	200	20	0.1	3.01e-09
IL2 STAT5 SIGNALING	199	19	0.0955	1.58e-08
CHOLESTEROL HOMEOSTASIS	74	7	0.0946	0.000761
NOTCH SIGNALING	32	3	0.0938	0.0303
APOPTOSIS	161	15	0.0932	6.94e-07
TGF BETA SIGNALING	54	5	0.0926	0.00527
ESTROGEN RESPONSE LATE	200	18	0.09	8.49e-08
MTORC1 SIGNALING	200	18	0.09	8.49e-08
ANDROGEN RESPONSE	100	8	0.08	0.000875
ESTROGEN RESPONSE EARLY	200	15	0.075	1.02e-05
COAGULATION	138	10	0.0725	0.000445
KRAS SIGNALING DN	200	14	0.07	4.45e-05
GLYCOLYSIS	200	13	0.065	0.000171
HYPOXIA	200	13	0.065	0.000171
BILE ACID METABOLISM	112	7	0.0625	0.00651
P53 PATHWAY	200	12	0.06	0.000584
FATTY ACID METABOLISM	158	9	0.057	0.00427
PROTEIN SECRETION	96	5	0.0521	0.0436
APICAL JUNCTION	200	10	0.05	0.00565
XENOBIOTIC METABOLISM	200	10	0.05	0.00565
HEME METABOLISM	200	9	0.045	0.0157
