# Supplementary figures and images for: Wnt signaling mediates acquisition of blood–brain barrier properties in naïve endothelium derived from human pluripotent stem cells
Source: eLife journal article supplement (doi:10.7554/elife.70992), 2021-11-10

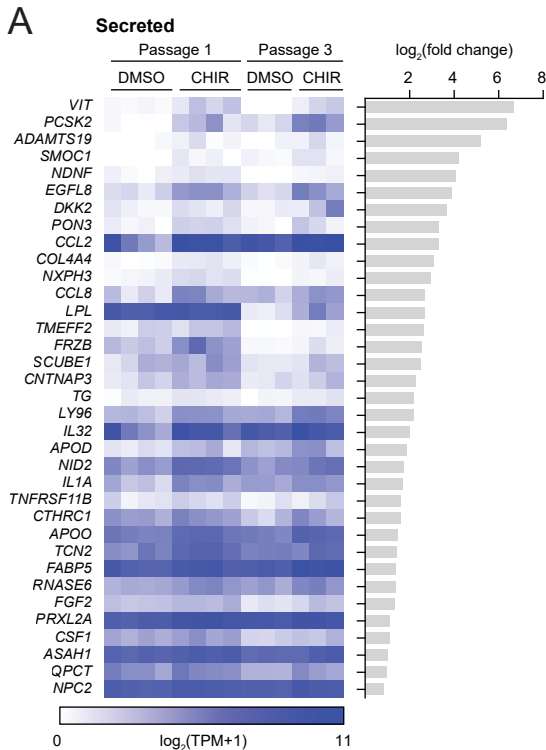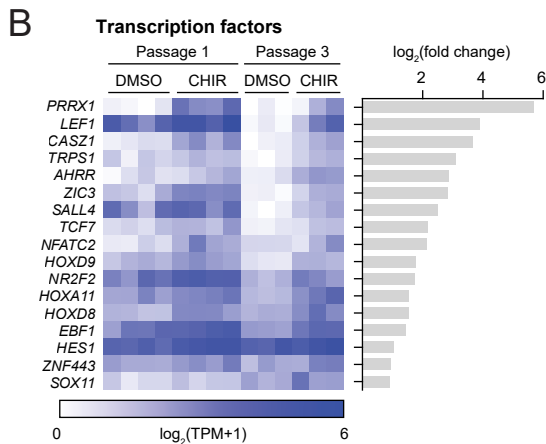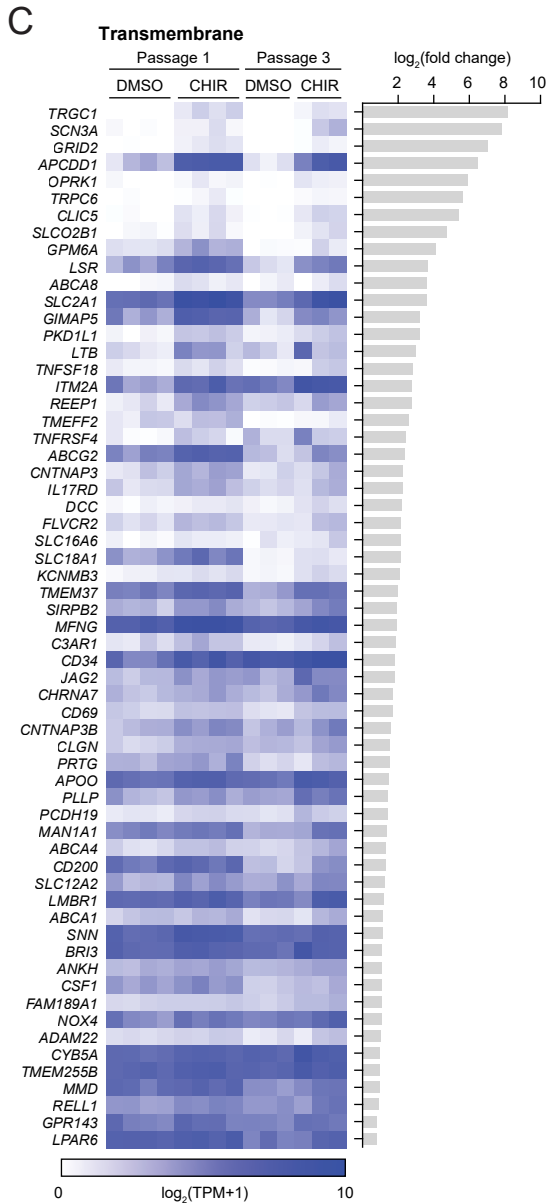

Supplement: supp [file elife-70992-supp-v2.zip]

A

DMSO

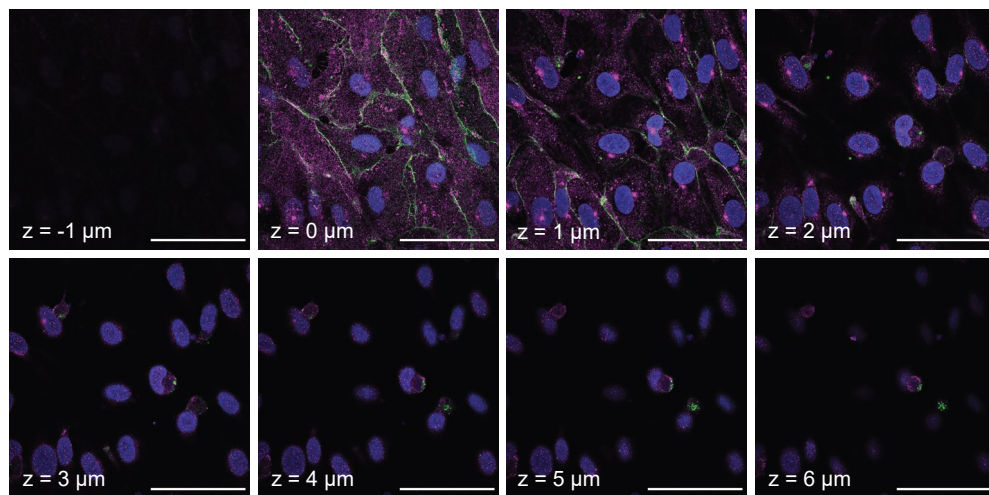

CHIR

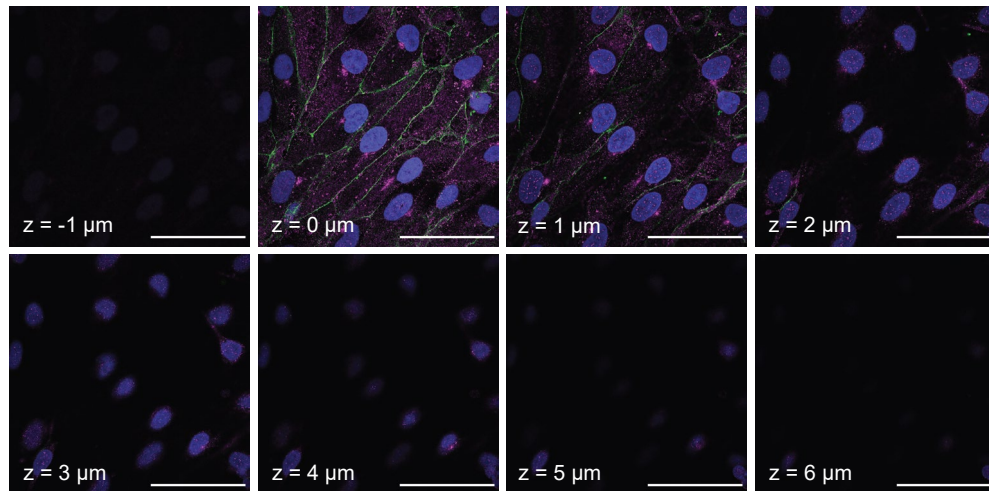

B

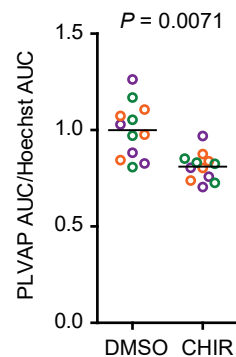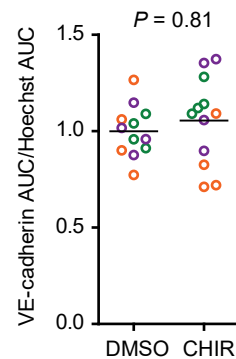

Supplement: supp [file elife-70992-supp-v2.zip]

A

Claudin-5 GLUT-1 Hoechst

DMSO

CHIR

IMR90-4

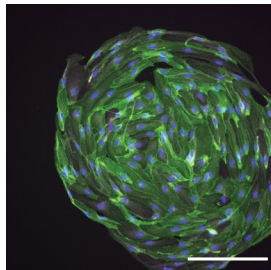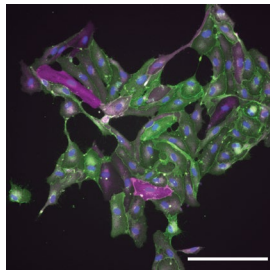

H9-CDH5-eGFP

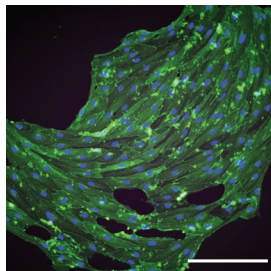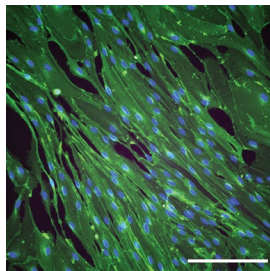

B

IMR90-4

H9-CDH5-eGFP

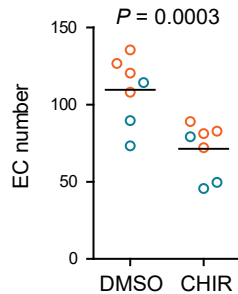

C

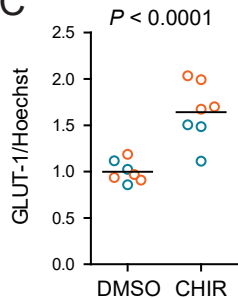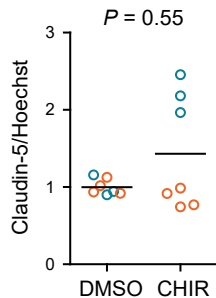

Supplement: supp [file elife-70992-supp-v2.zip]

A

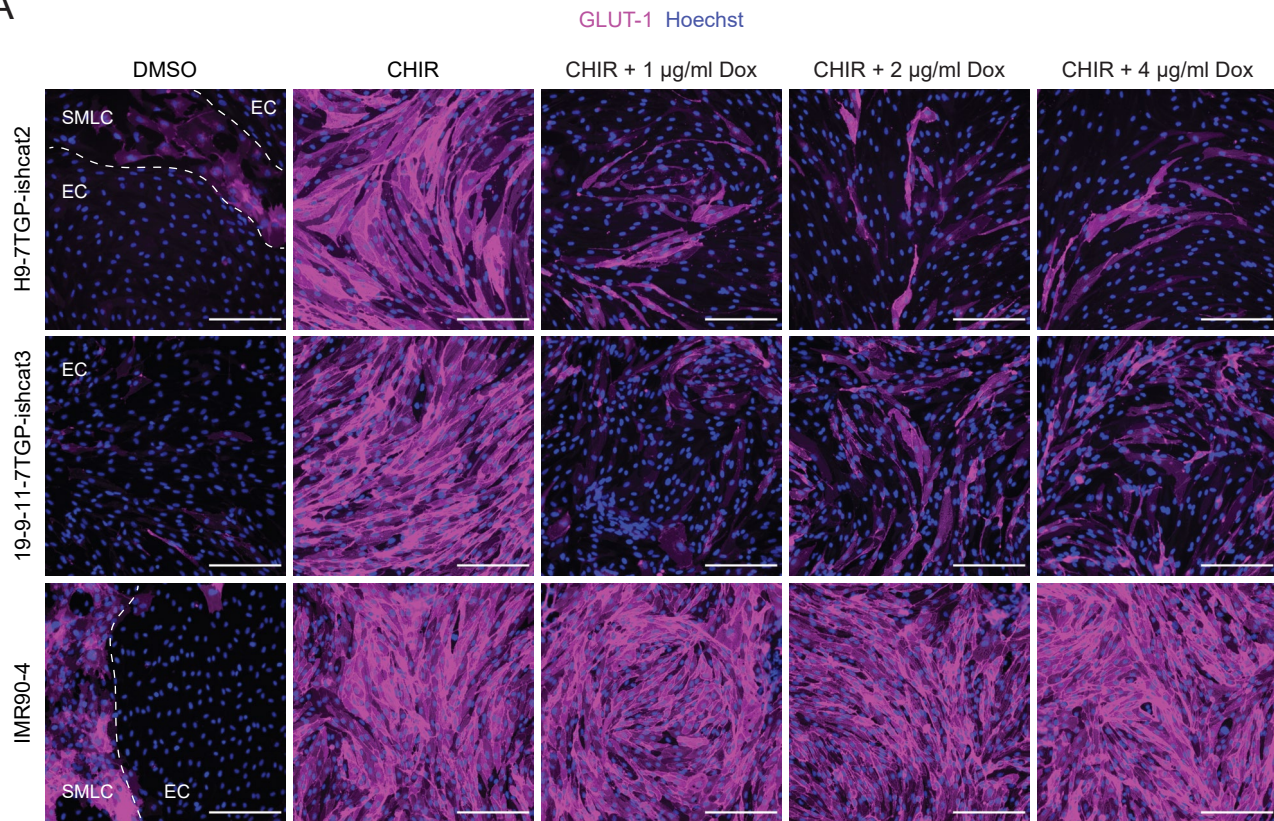

B

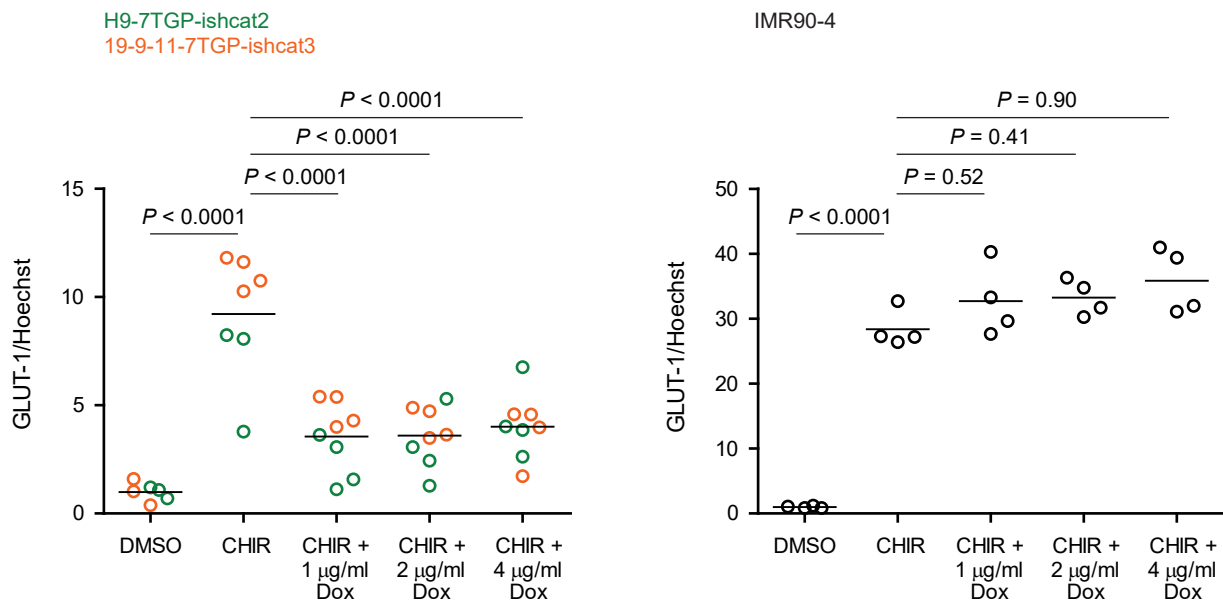

Supplement: supp [file elife-70992-supp-v2.zip]

A

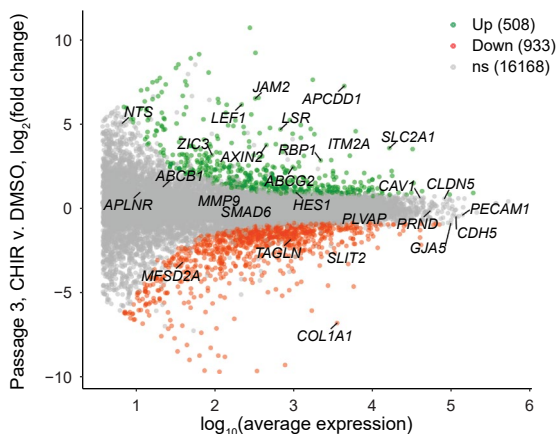

B

○ Passage 1, DMSO    □ Passage 1, CHIR    ◇ Passage 3, DMSO    △ Passage 3, CHIR

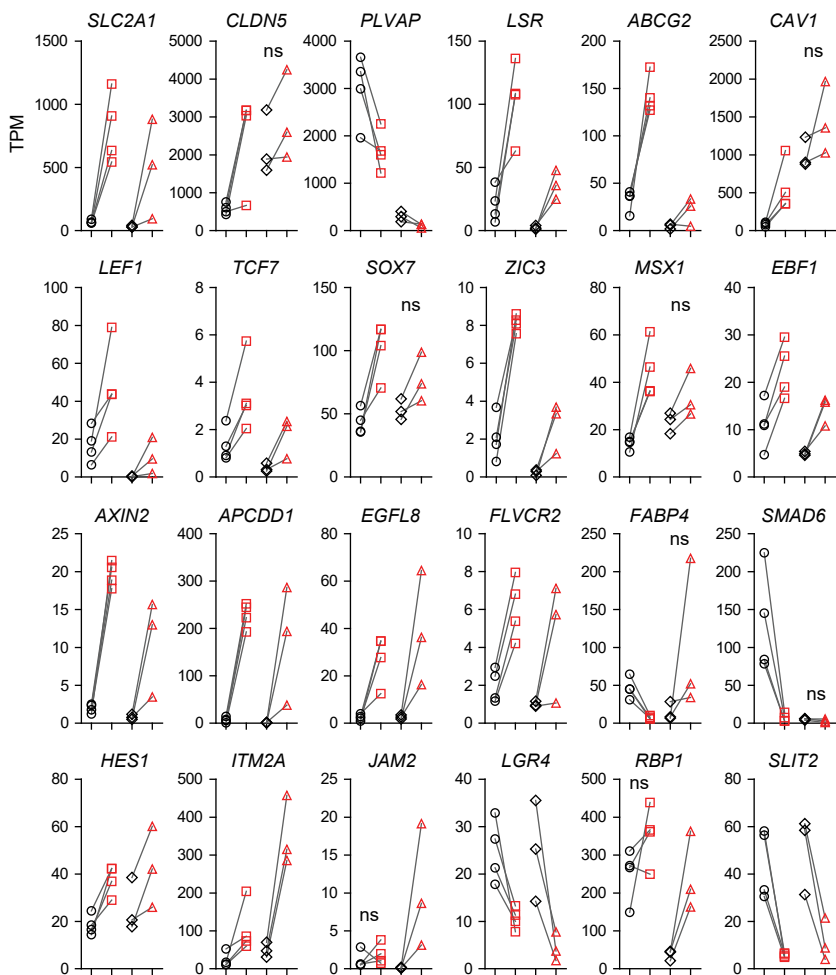

Supplement: supp [file elife-70992-supp-v2.zip]

A

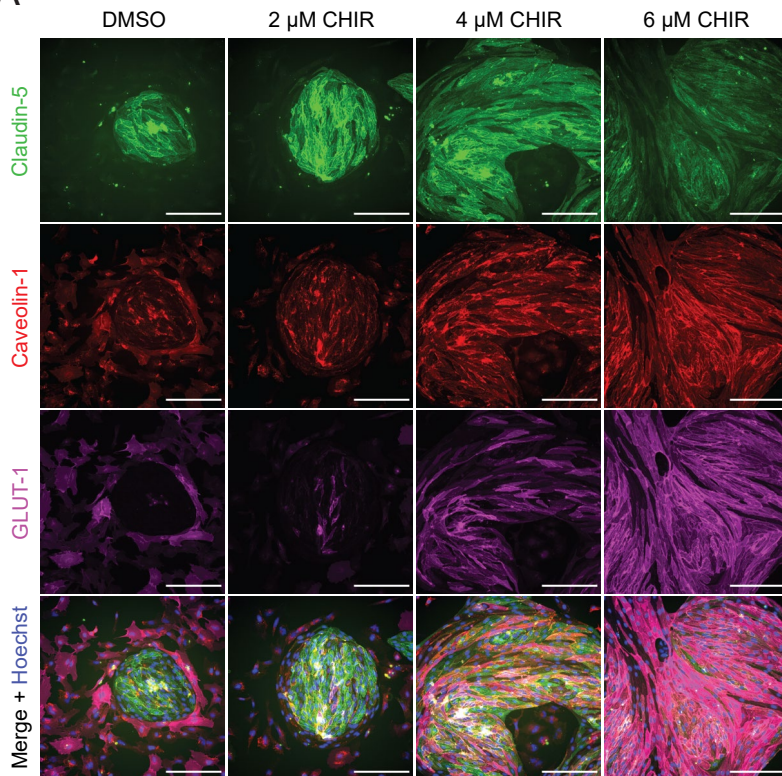

B

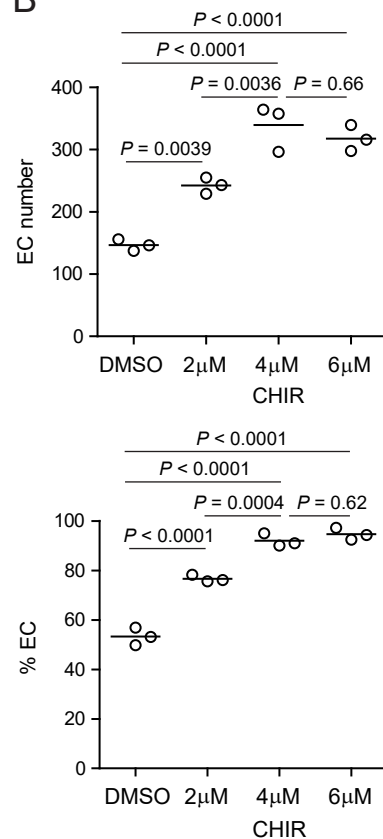

C

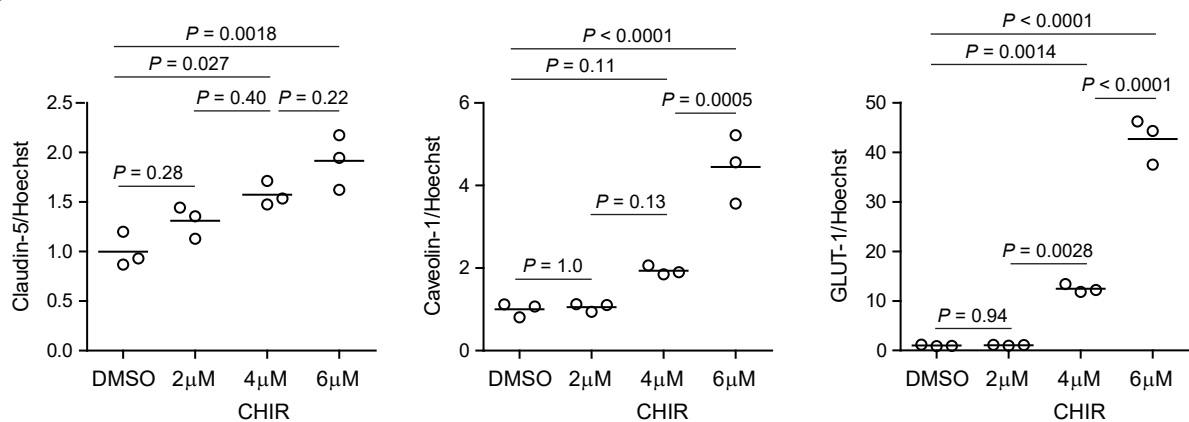

Supplement: supp [file elife-70992-supp-v2.zip]

A

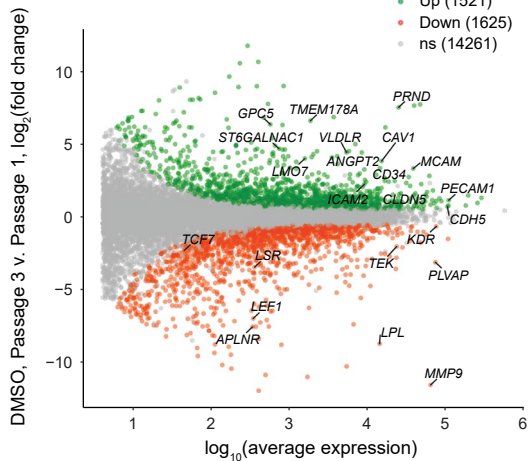

B

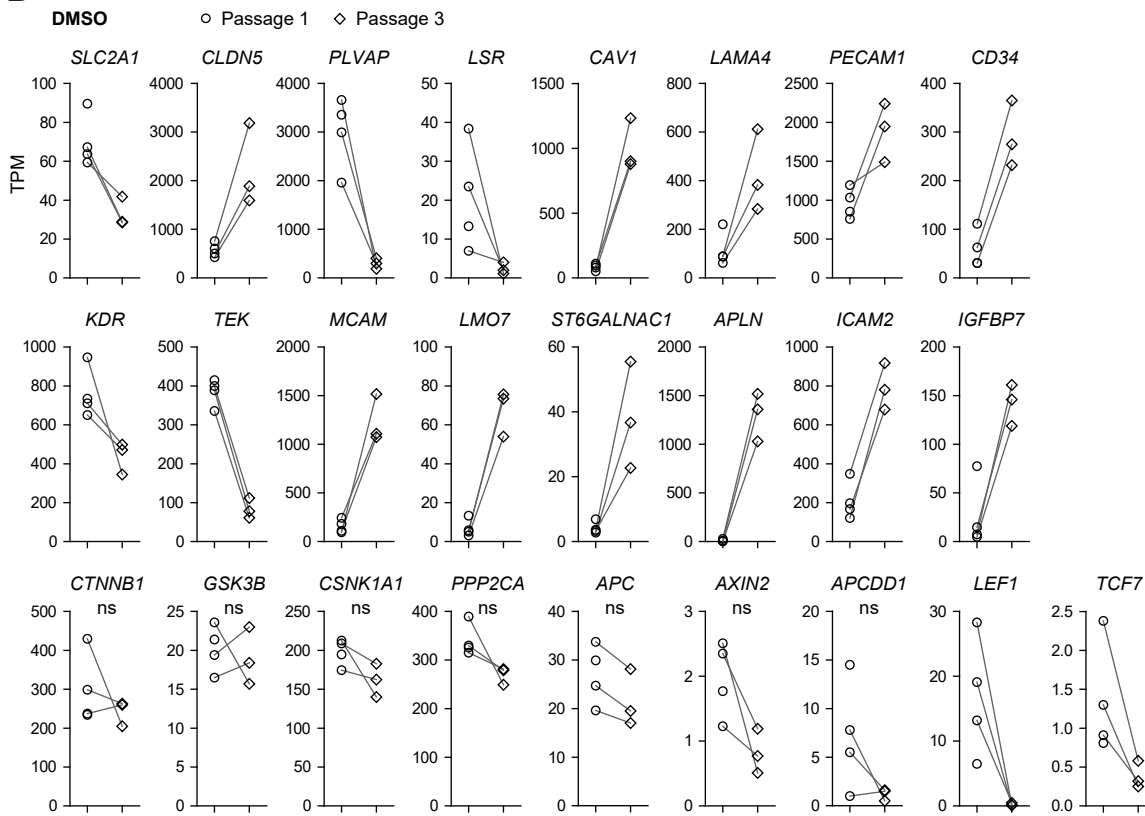

C

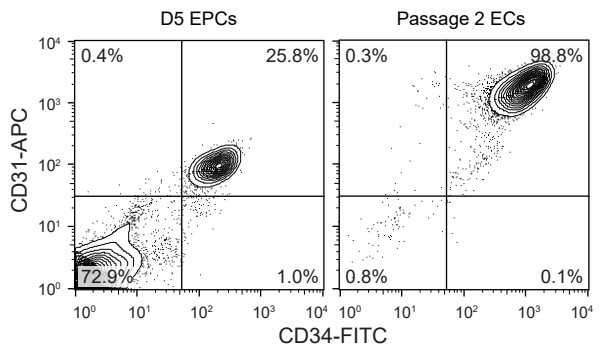

Supplement: supp [file elife-70992-supp-v2.zip]

Calponin

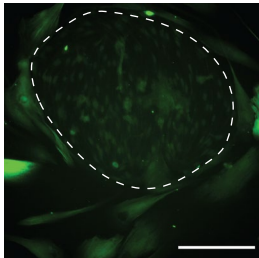

SM22 $\alpha$

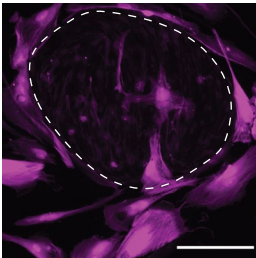

Merge + Hoechst

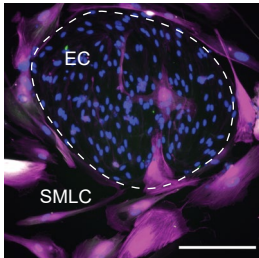

Supplement: supp [file elife-70992-supp-v2.zip]

**A**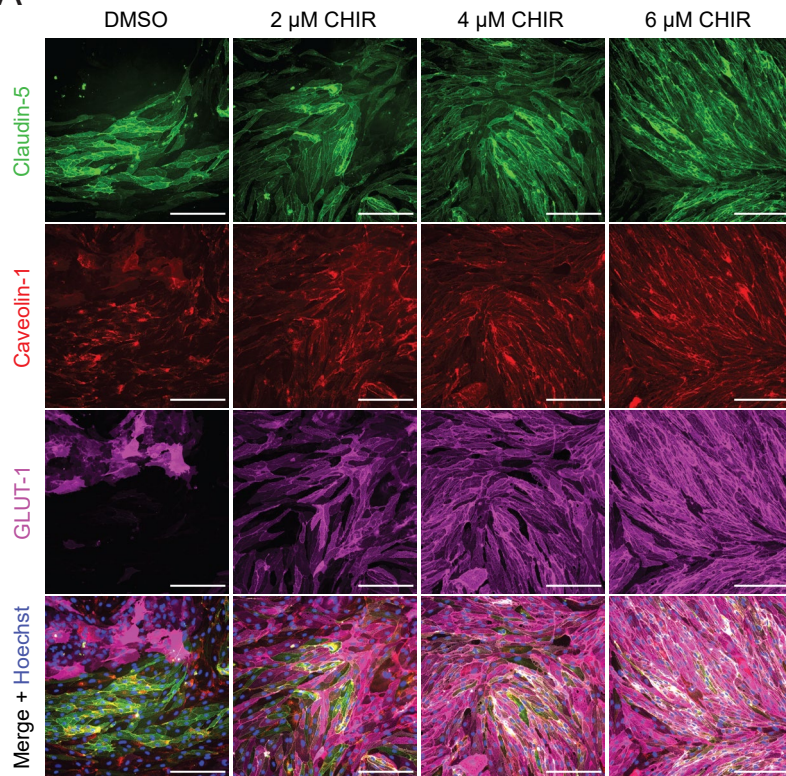**B**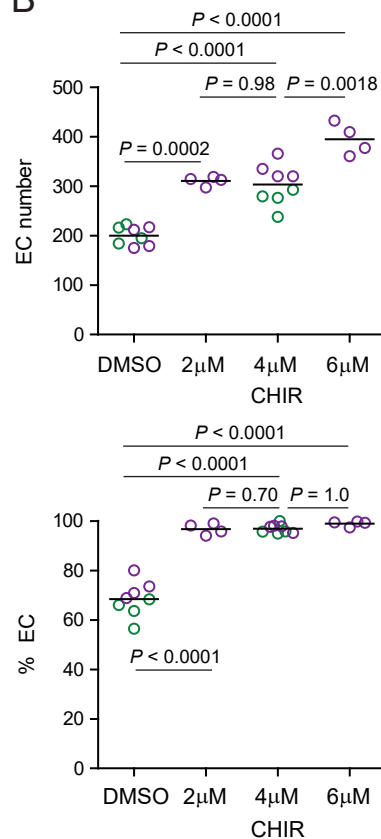**C**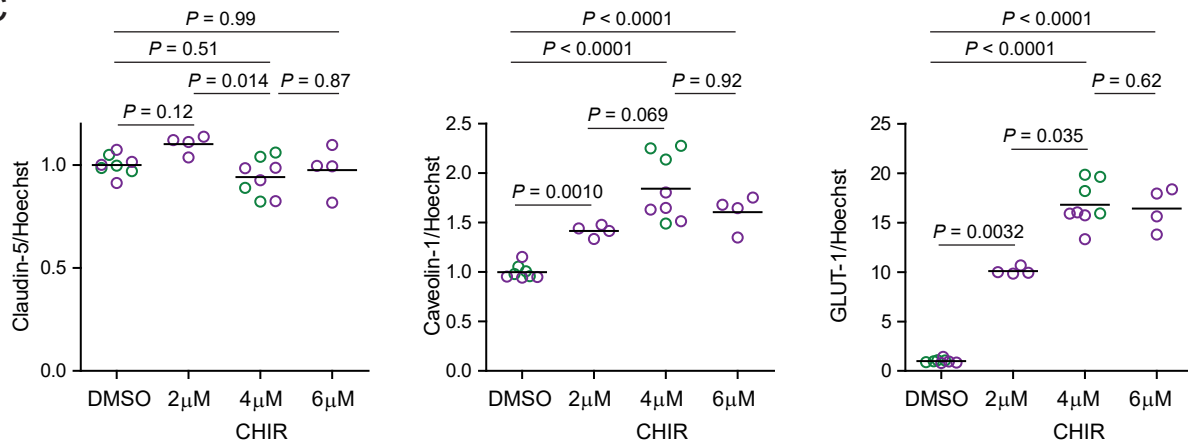

Supplement: supp [file elife-70992-supp-v2.zip]

A

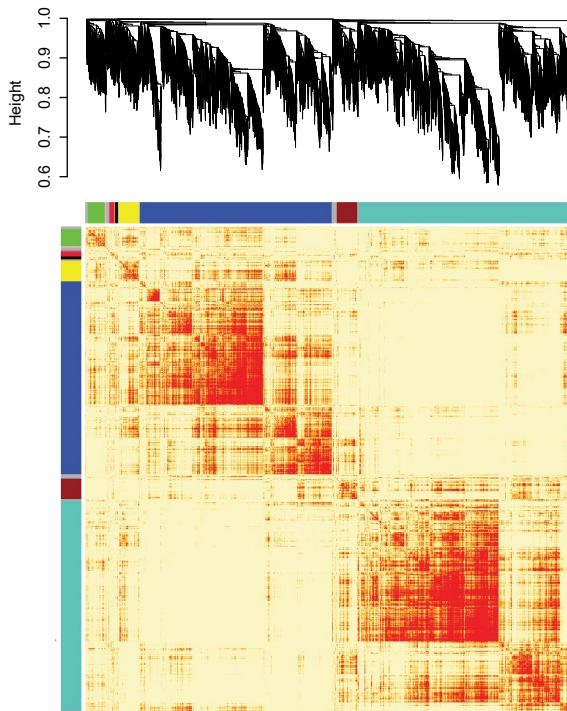

B

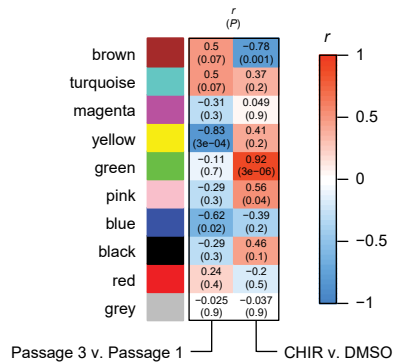

C

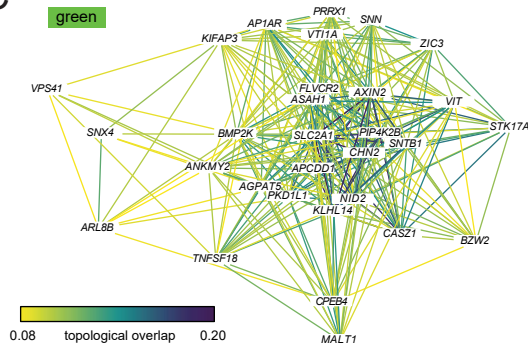

Supplement: supp [file elife-70992-supp-v2.zip]

hPSC EC, Passage 3, CHIR/DMSO,  
 $\log_2(\text{fold change})$

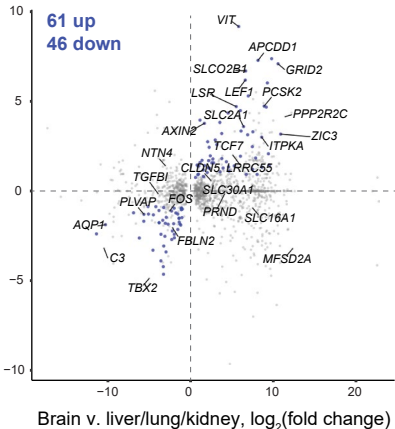

Supplement: supp [file elife-70992-supp-v2.zip]

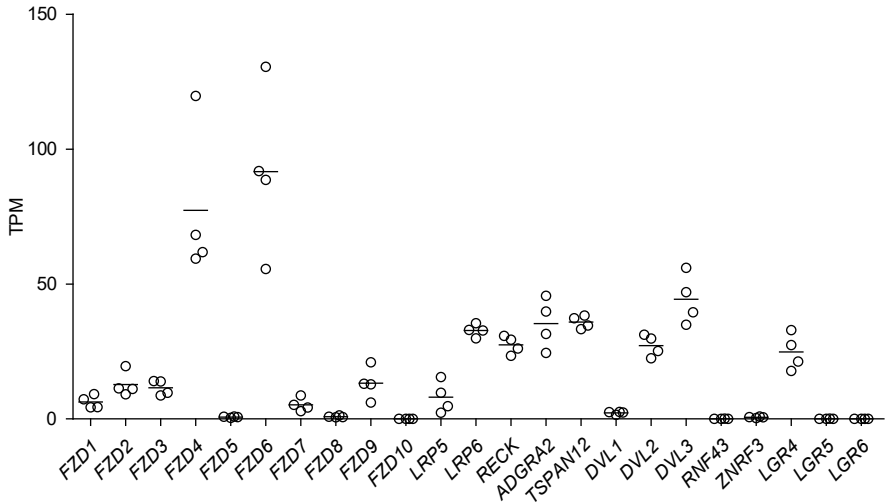

Supplement: supp [file elife-70992-supp-v2.zip]

A

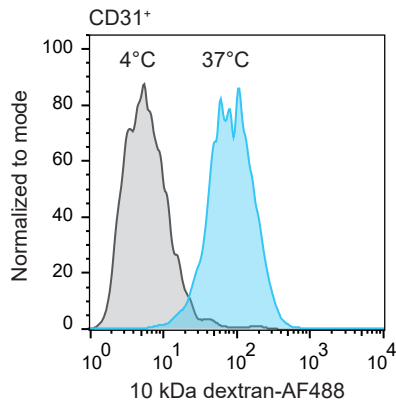

B

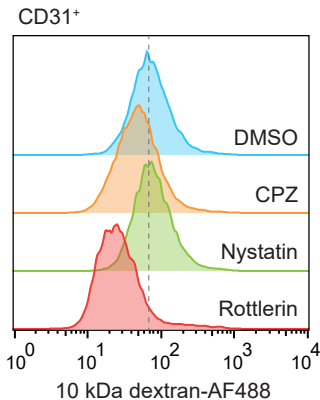

C

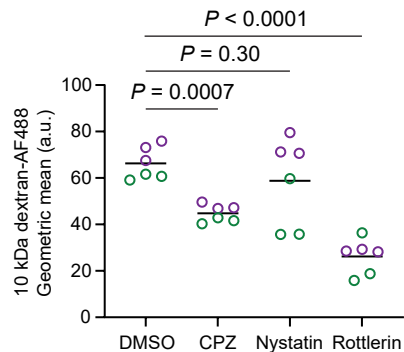

D

10 kDa dextran Caveolin-1 Hoechst

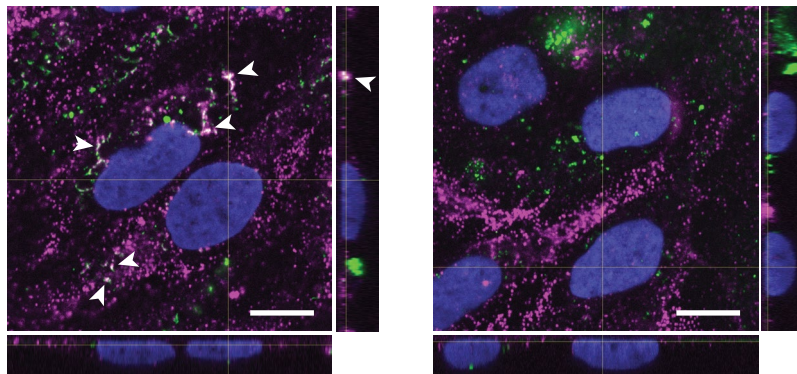

Supplement: supp [file elife-70992-supp-v2.zip]
